# Supplementary material for: Statistical and computational methods for integrating microbiome, host genomics, and metabolomics data
Source: eLife. 2024 Jun 4;13:e88956. doi: 10.7554/eLife.88956 (PMC11149933; doi:10.7554/eLife.88956)
Supplement: Supplementary file 1. — Table of estimated Pearson and Spearman’s correlations for all microbe and metabolite pairs. Correlations are calculated at baseline and 6 weeks using the original and log-transformed data. [file elife-88956-supp1.xlsx]

## Sheet: Baseline
metabolite	microbe	pr.cor.log	pr.cor.og	sp.cor.log	sp.cor.og
x2_hydroxybutyrate_p	acaryochloris	-0.238229	-0.0660967	-0.204431	-0.0279929
x2_hydroxybutyrate_p	acetoanaerobium	-0.337571	-0.108497	-0.328501	-0.207363
x2_hydroxybutyrate_p	acetobacter	0.299951	0.114992	0.242711	0.219525
x2_hydroxybutyrate_p	acetobacterium	0.0938695	0.101964	0.110767	0.126133
x2_hydroxybutyrate_p	acetohalobium	0.174077	0.292825	0.117337	0.178259
x2_hydroxybutyrate_p	acetomicrobium	-0.193767	-0.102429	-0.155889	-0.0604244
x2_hydroxybutyrate_p	acholeplasma	-0.145652	-0.0346185	-0.100071	0.0190047
x2_hydroxybutyrate_p	achromobacter	0.047735	0.0820368	0.0449042	0.112505
x2_hydroxybutyrate_p	acidaminococcus	-0.07226	-0.0684032	-0.114677	-0.0412662
x2_hydroxybutyrate_p	acidianus	-0.0725827	-0.0325327	-0.0876364	0.0681323
x2_hydroxybutyrate_p	acidiferrobacter	0.0922568	0.146295	0.0985503	0.179716
x2_hydroxybutyrate_p	acidihalobacter	0.192291	0.130269	0.128142	0.131958
x2_hydroxybutyrate_p	acidilobus	0.023916	0.154794	-0.00749308	0.285238
x2_hydroxybutyrate_p	acidimicrobium	0.0333107	0.0335564	-0.0134658	0.0830204
x2_hydroxybutyrate_p	acidiphilium	-0.0874292	-0.126244	-0.0973557	-0.0067211
x2_hydroxybutyrate_p	acidipropionibacterium	0.0398961	-0.0983667	-0.0907857	-0.015126
x2_hydroxybutyrate_p	acidithiobacillus	-0.234012	-0.195408	-0.139274	0.0264458
x2_hydroxybutyrate_p	acidobacterium	0.1128	0.0391739	0.048705	0.172108
x2_hydroxybutyrate_p	acidothermus	-0.157628	-0.0422095	-0.238693	-0.0345345
x2_hydroxybutyrate_p	acidovorax	0.269107	0.0945788	0.326112	0.181843
x2_hydroxybutyrate_p	aciduliprofundum	-0.323242	-0.0996033	-0.253027	-0.0803392
x2_hydroxybutyrate_p	acinetobacter	0.211454	-0.0694807	0.219906	0.0958897
x2_hydroxybutyrate_p	actinoalloteichus	0.188888	0.0826506	0.107564	0.175238
x2_hydroxybutyrate_p	actinobacillus	0.0145039	0.037275	-0.0359451	0.0346419
x2_hydroxybutyrate_p	actinomyces	0.106004	0.281971	0.0840528	0.159798
x2_hydroxybutyrate_p	actinoplanes	0.195312	0.0281355	0.22805	0.190911
x2_hydroxybutyrate_p	actinopolymorpha	-0.0313495	-0.1282	-0.07808	-0.023203
x2_hydroxybutyrate_p	actinopolyspora	0.0983166	0.0816533	0.101319	0.185453
x2_hydroxybutyrate_p	actinosynnema	-0.0495772	-0.124599	-0.105989	-0.0204297
x2_hydroxybutyrate_p	actinotignum	0.217227	0.152793	0.230385	0.239967
x2_hydroxybutyrate_p	acutalibacter	-0.166805	-0.0315505	-0.142749	-0.0157998
x2_hydroxybutyrate_p	adlercreutzia	0.322982	0.212392	0.327143	0.281425
x2_hydroxybutyrate_p	advenella	0.0303612	0.1117	0.0486507	0.0684522
x2_hydroxybutyrate_p	aequorivita	0.0639183	0.0264785	0.0693381	0.151857
x2_hydroxybutyrate_p	aeribacillus	-0.198549	-0.0738354	-0.194983	-0.0251134
x2_hydroxybutyrate_p	aerococcus	-0.00676431	-0.0596392	-0.00336646	0.146875
x2_hydroxybutyrate_p	aeromicrobium	0.150986	-0.0112454	0.115002	0.105693
x2_hydroxybutyrate_p	aeromonas	0.197475	0.151914	0.181571	0.180105
x2_hydroxybutyrate_p	afipia	-0.0277655	-0.154049	-0.00901341	0.0811163
x2_hydroxybutyrate_p	agarilytica	0.0729844	0.0136817	0.0315469	0.0464891
x2_hydroxybutyrate_p	agarivorans	0.0353205	0.0070159	0.0262801	0.0684827
x2_hydroxybutyrate_p	aggregatibacter	0.0133659	-0.0873521	-0.0765054	-0.0632025
x2_hydroxybutyrate_p	agrobacterium	0.0202385	-0.0706855	-0.00504968	0.0285606
x2_hydroxybutyrate_p	agrococcus	-0.135076	-0.0292677	-0.11902	-0.00152265
x2_hydroxybutyrate_p	agromyces	0.185336	0.168722	0.23386	0.175212
x2_hydroxybutyrate_p	ahniella	-0.00781697	0.135516	0.053266	0.212528
x2_hydroxybutyrate_p	akkermansia	0.108747	-0.0493793	0.117935	0.0759081
x2_hydroxybutyrate_p	alcaligenes	0.148649	0.168924	0.17359	0.151056
x2_hydroxybutyrate_p	alcanivorax	0.250004	0.163039	0.2489	0.227181
x2_hydroxybutyrate_p	algibacter	-0.0510709	0.0362815	-0.0338274	0.133554
x2_hydroxybutyrate_p	algoriphagus	0.278408	0.233046	0.360265	0.265007
x2_hydroxybutyrate_p	alicycliphilus	-0.233009	-0.0285411	-0.277244	-0.0778727
x2_hydroxybutyrate_p	alicyclobacillus	0.0207786	-0.0879816	0.0308954	0.0853791
x2_hydroxybutyrate_p	aliivibrio	0.102103	0.00488985	0.0864419	0.0645599
x2_hydroxybutyrate_p	alistipes	0.241518	0.0410677	0.274746	0.178857
x2_hydroxybutyrate_p	alkalilimnicola	-0.0553178	0.00760693	-0.0937721	-0.0111144
x2_hydroxybutyrate_p	alkaliphilus	-0.178255	-0.096169	-0.221643	-0.0467503
x2_hydroxybutyrate_p	alkalitalea	0.0681536	0.176212	0.0104252	0.023622
x2_hydroxybutyrate_p	alloactinosynnema	0.149124	0.114461	0.12988	0.222001
x2_hydroxybutyrate_p	allochromatium	-0.0495296	-0.0971467	-0.0466417	0.0161146
x2_hydroxybutyrate_p	allofrancisella	-0.127419	0.113259	-0.146604	0.0593395
x2_hydroxybutyrate_p	allokutzneria	0.0809971	0.178697	-0.0123799	0.138312
x2_hydroxybutyrate_p	altererythrobacter	0.0584284	-0.0131768	0.0673834	0.0324709
x2_hydroxybutyrate_p	alteromonas	0.163225	0.185342	0.135853	0.153337
x2_hydroxybutyrate_p	aminobacter	0.00889179	-0.0262085	0.00537547	0.0346785
x2_hydroxybutyrate_p	aminobacterium	-0.198422	-0.124108	-0.253896	-0.0236148
x2_hydroxybutyrate_p	aminomonas	-0.0583056	0.0704662	-0.105555	0.0231914
x2_hydroxybutyrate_p	ammonifex	-0.0508177	-0.0691378	-0.113211	0.0876602
x2_hydroxybutyrate_p	amphibacillus	-0.0908357	-0.0180825	-0.0839442	0.080899
x2_hydroxybutyrate_p	amycolatopsis	0.052989	-0.0257421	0.06494	0.0835392
x2_hydroxybutyrate_p	anabaena	-0.213731	-0.120606	-0.218548	-0.0778949
x2_hydroxybutyrate_p	anabaenopsis	-0.0961549	-0.0171613	-0.077157	0.109561
x2_hydroxybutyrate_p	anaerococcus	-0.0839554	-0.129541	-0.113916	0.0046153
x2_hydroxybutyrate_p	anaerolinea	0.0499916	-0.0523069	0.0907857	0.0642359
x2_hydroxybutyrate_p	anaeromyxobacter	0.0943318	0.00421391	-0.0104252	0.0497652
x2_hydroxybutyrate_p	anaerostipes	0.207747	-0.101051	0.245154	0.131129
x2_hydroxybutyrate_p	anaerotignum	-0.107898	-0.246778	-0.101482	0.0333388
x2_hydroxybutyrate_p	anaplasma	-0.229859	-0.205993	-0.165228	-0.00523712
x2_hydroxybutyrate_p	anderseniella	-0.0483589	0.184483	0.0395287	0.119052
x2_hydroxybutyrate_p	aneurinibacillus	0.203646	0.183906	0.178259	0.216702
x2_hydroxybutyrate_p	anoxybacillus	0.130347	0.0594615	0.152196	0.144269
x2_hydroxybutyrate_p	antarctobacter	-0.0174338	0.161346	-0.0778628	0.0606834
x2_hydroxybutyrate_p	aquabacterium	-0.0846559	0.037895	-0.16235	0.03323
x2_hydroxybutyrate_p	aquaspirillum	0.0227776	-0.0213841	0.0205788	0.078883
x2_hydroxybutyrate_p	aquifex	-0.172821	-0.0143067	-0.124016	0.00192721
x2_hydroxybutyrate_p	aquiflexum	0.0908325	-0.00525365	0.107129	0.108074
x2_hydroxybutyrate_p	arachidicoccus	0.0393521	0.0619337	0.0579899	0.0330852
x2_hydroxybutyrate_p	arcanobacterium	-0.0784471	0.0206152	-0.108921	0.00869235
x2_hydroxybutyrate_p	archaeoglobus	-0.124507	-0.104711	-0.110061	-0.0776011
x2_hydroxybutyrate_p	archangium	0.0214879	-0.021082	0.0870935	0.0804286
x2_hydroxybutyrate_p	arcobacter	-0.110644	-0.0138535	-0.138188	-0.0213939
x2_hydroxybutyrate_p	arcticibacterium	0.269043	0.220971	0.296628	0.343466
x2_hydroxybutyrate_p	arenibacter	-0.0290566	0.142378	-0.0803605	-0.0515775
x2_hydroxybutyrate_p	aromatoleum	0.0278835	0.14933	0.0234023	0.0996903
x2_hydroxybutyrate_p	arsenicicoccus	0.0895751	0.0385758	0.107672	0.128998
x2_hydroxybutyrate_p	arsenophonus	-0.164354	-0.0426212	-0.102785	-0.0679738
x2_hydroxybutyrate_p	arthrobacter	0.206081	-0.0806346	0.299452	0.144866
x2_hydroxybutyrate_p	arthrospira	-0.0466231	-0.0925541	-0.104034	-0.0181996
x2_hydroxybutyrate_p	asaia	-0.0252926	0.00749478	0.0269859	0.11458
x2_hydroxybutyrate_p	asticcacaulis	-0.184206	-0.0564585	-0.211109	-0.0693497
x2_hydroxybutyrate_p	atopobium	-0.0471991	-0.0136321	0.0318727	0.00152033
x2_hydroxybutyrate_p	aurantimicrobium	0.00309425	-0.0251523	-0.103709	0.041601
x2_hydroxybutyrate_p	auraticoccus	0.00380675	0.0367998	-0.0729218	0.122938
x2_hydroxybutyrate_p	aureimonas	-0.153879	-0.12187	-0.171309	-0.0154984
x2_hydroxybutyrate_p	aureitalea	-0.0494768	0.108503	-0.0713471	0.113549
x2_hydroxybutyrate_p	auricoccus	-0.0375278	0.334985	-0.158549	0.0318542
x2_hydroxybutyrate_p	azoarcus	0.18166	0.067184	0.115871	0.15616
x2_hydroxybutyrate_p	azorhizobium	-0.23577	-0.179255	-0.219525	0.0052683
x2_hydroxybutyrate_p	azospira	0.221499	0.0923514	0.237118	0.187929
x2_hydroxybutyrate_p	azospirillum	0.226326	0.0518631	0.190205	0.125048
x2_hydroxybutyrate_p	azotobacter	-0.170509	-0.049502	-0.205408	-0.0150421
x2_hydroxybutyrate_p	bacillus	0.120092	0.0782019	0.108432	0.133138
x2_hydroxybutyrate_p	bacterioplanes	-0.0909348	0.028782	-0.0868763	0.0338127
x2_hydroxybutyrate_p	bacteriovorax	0.102257	0.0502842	0.0718901	0.212661
x2_hydroxybutyrate_p	bacteroides	0.289226	0.192158	0.212793	0.157843
x2_hydroxybutyrate_p	barnesiella	0.241406	0.159012	0.325514	0.196395
x2_hydroxybutyrate_p	bartonella	0.197959	0.124727	0.229571	0.198843
x2_hydroxybutyrate_p	basfia	0.0256424	-0.00872707	0.00553836	0.0257668
x2_hydroxybutyrate_p	basilea	0.139701	-0.120824	0.122876	0.0734135
x2_hydroxybutyrate_p	bdellovibrio	0.0161685	0.0829251	0.130097	0.0932588
x2_hydroxybutyrate_p	beggiatoa	-0.0308065	0.0385835	-0.0855731	-0.00496959
x2_hydroxybutyrate_p	beijerinckia	-0.0914386	0.117529	-0.107998	0.00280299
x2_hydroxybutyrate_p	belliella	0.134726	0.133713	0.144323	0.159721
x2_hydroxybutyrate_p	bernardetia	0.0846059	0.172419	0.167454	0.120117
x2_hydroxybutyrate_p	beutenbergia	0.118503	-0.0269931	0.0624966	0.144293
x2_hydroxybutyrate_p	bibersteinia	-0.122044	-0.0413893	-0.157355	-0.0286259
x2_hydroxybutyrate_p	bifidobacterium	0.0865115	0.431489	0.0586415	-0.00640712
x2_hydroxybutyrate_p	blastochloris	-0.146065	-0.0145778	-0.153337	0.0220658
x2_hydroxybutyrate_p	blastococcus	0.034573	0.0306531	0.0269316	0.0524471
x2_hydroxybutyrate_p	blastomonas	-0.132987	-0.0894478	-0.114622	-0.0123432
x2_hydroxybutyrate_p	blattabacterium	-0.0533091	-0.005028	0.0460444	0.0110779
x2_hydroxybutyrate_p	blautia	0.0805713	0.0533823	0.0103166	0.0697182
x2_hydroxybutyrate_p	bordetella	0.185564	0.147344	0.210458	0.186621
x2_hydroxybutyrate_p	borrelia	-0.205702	-0.122423	-0.15464	-0.0500353
x2_hydroxybutyrate_p	borreliella	-0.307353	-0.168215	-0.365423	-0.153503
x2_hydroxybutyrate_p	bosea	0.174561	0.0489416	0.173047	0.156214
x2_hydroxybutyrate_p	brachybacterium	-0.135977	-0.128534	-0.0570668	-0.0713471
x2_hydroxybutyrate_p	brachyspira	-0.102729	-0.0604452	-0.0796004	0.0545978
x2_hydroxybutyrate_p	bradymonas	-0.181354	-0.149854	-0.22034	-0.0627685
x2_hydroxybutyrate_p	bradyrhizobium	0.0638177	-0.0590553	0.0748222	0.0650486
x2_hydroxybutyrate_p	brenneria	-0.178721	-0.0851416	-0.0567954	-0.084218
x2_hydroxybutyrate_p	brevefilum	0.00559745	0.0285345	-0.0536461	0.0192902
x2_hydroxybutyrate_p	brevibacillus	-0.0631222	0.0178061	-0.0477819	0.0181897
x2_hydroxybutyrate_p	brevibacterium	0.100533	-0.130364	0.0919802	0.0184069
x2_hydroxybutyrate_p	brevirhabdus	-0.181175	-0.0878045	-0.175816	-0.0175664
x2_hydroxybutyrate_p	brevundimonas	0.0927712	0.071375	0.0485964	0.121572
x2_hydroxybutyrate_p	brochothrix	0.00772656	0.0399252	0.000814465	0.0529945
x2_hydroxybutyrate_p	brucella	0.0315315	0.201854	-0.0308954	0.0673907
x2_hydroxybutyrate_p	buchnera	-0.147462	-0.116609	-0.184884	-0.0956479
x2_hydroxybutyrate_p	burkholderia	0.100981	-0.0379461	0.101591	0.125428
x2_hydroxybutyrate_p	butyrivibrio	0.177654	0.191307	0.141988	0.193082
x2_hydroxybutyrate_p	caldanaerobacter	0.113807	0.214054	0.100505	0.12407
x2_hydroxybutyrate_p	caldicellulosiruptor	-0.218859	-0.0756635	-0.163653	-0.0420807
x2_hydroxybutyrate_p	caldilinea	-0.0467908	0.0339769	-0.0210132	0.0831001
x2_hydroxybutyrate_p	caldimicrobium	-0.215907	-0.0245728	-0.236466	-0.101108
x2_hydroxybutyrate_p	caldisericum	0.0339234	0.0417862	-0.0646142	0.14158
x2_hydroxybutyrate_p	caldisphaera	-0.0915927	0.241577	-0.0428952	0.285552
x2_hydroxybutyrate_p	calditerrivibrio	-0.228745	-0.154953	-0.185318	-0.00988325
x2_hydroxybutyrate_p	caldithrix	0.197585	0.0149369	0.213118	0.241174
x2_hydroxybutyrate_p	calothrix	0.0757463	0.0931308	0.0464245	0.0478362
x2_hydroxybutyrate_p	campylobacter	0.0940745	-0.0882201	0.0597817	0.0386599
x2_hydroxybutyrate_p	candidatus_accumulibacter	-0.137789	-0.110951	-0.0692295	0.0992986
x2_hydroxybutyrate_p	candidatus_amoebophilus	-0.141999	-0.0345251	-0.122821	0.0348954
x2_hydroxybutyrate_p	candidatus_aquiluna	-0.0276331	-0.0207102	-0.0655373	0.144373
x2_hydroxybutyrate_p	candidatus_arthromitus	-0.29854	-0.116185	-0.273063	-0.102897
x2_hydroxybutyrate_p	candidatus_atelocyanobacterium	-0.0508378	0.106719	-0.103003	0.107257
x2_hydroxybutyrate_p	candidatus_azobacteroides	0.0590575	0.125647	0.147092	0.100027
x2_hydroxybutyrate_p	candidatus_babela	-0.19392	-0.00332507	-0.0819352	0.0247911
x2_hydroxybutyrate_p	candidatus_blochmannia	-0.164683	-0.0397614	-0.139328	-0.0217521
x2_hydroxybutyrate_p	candidatus_cardinium	0.0724892	0.042718	0.0229136	0.124272
x2_hydroxybutyrate_p	candidatus_carsonella	-0.297658	-0.149246	-0.249335	-0.203758
x2_hydroxybutyrate_p	candidatus_cloacimonas	-0.0417864	0.188022	-0.0597274	0.0753276
x2_hydroxybutyrate_p	candidatus_desulfofervidus	-0.137696	0.172104	-0.208503	-0.0475877
x2_hydroxybutyrate_p	candidatus_desulforudis	0.171251	0.308263	0.0624966	0.19545
x2_hydroxybutyrate_p	candidatus_doolittlea	-0.2521	-0.105414	-0.255851	-0.204327
x2_hydroxybutyrate_p	candidatus_endolissoclinum	-0.24922	-0.0844234	-0.248683	-0.113042
x2_hydroxybutyrate_p	candidatus_evansia	-0.237622	-0.129337	-0.233208	-0.163682
x2_hydroxybutyrate_p	candidatus_fokinia	0.0687158	0.169537	0.0687951	0.275771
x2_hydroxybutyrate_p	candidatus_fonsibacter	0.0944208	0.390085	-0.0205788	0.117764
x2_hydroxybutyrate_p	candidatus_gullanella	0.0687065	0.112537	0.0681436	0.156871
x2_hydroxybutyrate_p	candidatus_hamiltonella	0.016107	0.131603	-0.0452843	0.102068
x2_hydroxybutyrate_p	candidatus_hoaglandella	-0.0911601	-0.167168	-0.0291035	0.0490875
x2_hydroxybutyrate_p	candidatus_ishikawaella	-0.204882	-0.151945	-0.167671	-0.0786138
x2_hydroxybutyrate_p	candidatus_izimaplasma	-0.128936	-0.162548	-0.187544	-0.0425283
x2_hydroxybutyrate_p	candidatus_kinetoplastibacterium	-0.207813	-0.178274	-0.188304	-0.0385013
x2_hydroxybutyrate_p	candidatus_korarchaeum	-0.156225	0.00346508	-0.12988	0.0157998
x2_hydroxybutyrate_p	candidatus_koribacter	0.193046	0.189501	0.109355	0.153894
x2_hydroxybutyrate_p	candidatus_kuenenia	-0.186292	-0.165196	-0.204485	-0.0389499
x2_hydroxybutyrate_p	candidatus_methanomethylophilus	0.0186053	0.0384527	-0.0234023	0.0271598
x2_hydroxybutyrate_p	candidatus_methanoplasma	-0.0186512	0.047863	-0.0561438	0.0843094
x2_hydroxybutyrate_p	candidatus_methylopumilus	-0.308195	-0.130581	-0.280393	-0.0593223
x2_hydroxybutyrate_p	candidatus_midichloria	-0.200016	-0.0931197	-0.166857	0.0399033
x2_hydroxybutyrate_p	candidatus_mikella	-0.22221	-0.0353519	-0.224738	-0.223522
x2_hydroxybutyrate_p	candidatus_moranella	-0.227919	-0.152752	-0.229245	-0.139327
x2_hydroxybutyrate_p	candidatus_nanopelagicus	-0.0130643	0.0999064	0.0377369	0.160487
x2_hydroxybutyrate_p	candidatus_nasuia	-0.143648	0.0208058	-0.135527	0.0992275
x2_hydroxybutyrate_p	candidatus_nitrosocaldus	-0.114301	0.0794253	-0.0741706	0.131172
x2_hydroxybutyrate_p	candidatus_nitrosoglobus	-0.270216	-0.125937	-0.22539	-0.0317774
x2_hydroxybutyrate_p	candidatus_nitrosomarinus	-0.180435	-0.107418	-0.15464	-0.126398
x2_hydroxybutyrate_p	candidatus_nitrosopelagicus	-0.156756	0.00579944	-0.13835	0.0568593
x2_hydroxybutyrate_p	candidatus_nitrosotenuis	-0.104671	0.282318	-0.120269	0.0370225
x2_hydroxybutyrate_p	candidatus_nucleicultrix	-0.267838	-0.042464	-0.265787	-0.0930468
x2_hydroxybutyrate_p	candidatus_paracaedibacter	-0.398607	-0.207441	-0.416572	-0.264088
x2_hydroxybutyrate_p	candidatus_pelagibacter	-0.180688	-0.142859	-0.158875	0.0232896
x2_hydroxybutyrate_p	candidatus_phaeomarinobacter	-0.346512	-0.154986	-0.272954	-0.137782
x2_hydroxybutyrate_p	candidatus_phycorickettsia	0.172705	0.247485	0.149264	0.203615
x2_hydroxybutyrate_p	candidatus_phytoplasma	-0.066271	-0.115158	-0.0257371	0.120762
x2_hydroxybutyrate_p	candidatus_planktophila	0.0486979	0.0806271	0.00526687	0.113322
x2_hydroxybutyrate_p	candidatus_portiera	-0.276723	-0.259989	-0.235	-0.269008
x2_hydroxybutyrate_p	candidatus_profftella	0.0765736	0.185258	0.0527773	0.237368
x2_hydroxybutyrate_p	candidatus_promineofilum	0.214813	-0.0259225	0.243742	0.113295
x2_hydroxybutyrate_p	candidatus_protochlamydia	0.075465	0.237068	0.0236195	0.212245
x2_hydroxybutyrate_p	candidatus_puniceispirillum	-0.0550424	0.212683	-0.189336	-0.038507
x2_hydroxybutyrate_p	candidatus_riesia	-0.154502	-0.0483127	-0.0915459	0.00336358
x2_hydroxybutyrate_p	candidatus_ruthia	-0.145583	-0.048612	-0.181951	-0.0377316
x2_hydroxybutyrate_p	candidatus_solibacter	0.0183184	-0.127633	0.0263344	-0.00781886
x2_hydroxybutyrate_p	candidatus_sulcia	-0.0787073	0.0519659	-0.0744421	0.10262
x2_hydroxybutyrate_p	candidatus_symbiobacter	-0.00306083	0.13626	-0.0103709	0.0200923
x2_hydroxybutyrate_p	candidatus_tachikawaea	-0.0837201	0.0247669	-0.171961	-0.134319
x2_hydroxybutyrate_p	candidatus_thioglobus	-0.31771	-0.0880947	-0.34832	-0.152482
x2_hydroxybutyrate_p	candidatus_tremblaya	-0.230394	-0.166927	-0.183743	-0.068721
x2_hydroxybutyrate_p	candidatus_walczuchella	-0.197731	0.035155	-0.248955	-0.120739
x2_hydroxybutyrate_p	candidatus_xiphinematobacter	0.0238143	0.125691	0.00874192	0.129408
x2_hydroxybutyrate_p	capnocytophaga	0.24449	0.182414	0.290112	0.166477
x2_hydroxybutyrate_p	carboxydocella	0.0462518	0.058092	0.0372482	0.0808492
x2_hydroxybutyrate_p	carboxydothermus	0.00540154	0.159686	0.00852473	0.206769
x2_hydroxybutyrate_p	carnobacterium	0.0379757	0.011844	0.0197643	0.128034
x2_hydroxybutyrate_p	castellaniella	0.0930409	0.176139	0.114948	0.224962
x2_hydroxybutyrate_p	catenovulum	0.0493277	0.0420621	-0.0425694	0.105673
x2_hydroxybutyrate_p	catenulispora	0.0113923	-0.0683249	-0.000868763	0.0572181
x2_hydroxybutyrate_p	caulobacter	0.117544	-0.121009	0.0380084	0.00602704
x2_hydroxybutyrate_p	cedecea	-0.134826	-0.181656	0.0522344	-0.033556
x2_hydroxybutyrate_p	celeribacter	0.0255491	0.0847578	0.0679264	0.206554
x2_hydroxybutyrate_p	cellulomonas	0.109769	0.10295	0.107401	0.135151
x2_hydroxybutyrate_p	cellulophaga	0.0846851	0.100458	0.0630396	0.112101
x2_hydroxybutyrate_p	cellulosilyticum	0.0867297	0.0396306	0.0457186	0.0724874
x2_hydroxybutyrate_p	cellulosimicrobium	-0.0731725	-0.010161	-0.0444155	0.0508824
x2_hydroxybutyrate_p	cellvibrio	0.189898	0.242265	0.245751	0.21964
x2_hydroxybutyrate_p	chamaesiphon	0.0613123	0.205134	0.0122713	0.0789502
x2_hydroxybutyrate_p	chania	-0.0372899	0.126451	0.00874192	0.128484
x2_hydroxybutyrate_p	chelativorans	-0.0996979	0.0196688	-0.122496	-0.0163971
x2_hydroxybutyrate_p	chelatococcus	-0.00625923	0.0188129	0.00662431	0.0703717
x2_hydroxybutyrate_p	chitinophaga	0.0960671	-0.0590673	0.128685	0.0605962
x2_hydroxybutyrate_p	chlamydia	-0.308618	-0.0493628	-0.268448	-0.104797
x2_hydroxybutyrate_p	chloracidobacterium	0.00624532	-0.0847396	0.0292121	0.1732
x2_hydroxybutyrate_p	chlorobaculum	0.112894	-0.00862069	0.129446	0.108867
x2_hydroxybutyrate_p	chlorobium	0.048307	0.123778	0.0983874	0.103274
x2_hydroxybutyrate_p	chloroflexus	0.199538	0.199656	0.195634	0.224317
x2_hydroxybutyrate_p	chloroherpeton	0.00269011	0.00660811	-0.0721616	0.0924447
x2_hydroxybutyrate_p	chondrocystis	0.0717187	-0.0224742	0.0481077	0.169562
x2_hydroxybutyrate_p	chondromyces	0.11636	0.119697	0.113699	0.123715
x2_hydroxybutyrate_p	christensenella	0.00274027	-0.0482512	-0.0154748	0.0268773
x2_hydroxybutyrate_p	chromobacterium	0.293706	0.0976624	0.326166	0.148698
x2_hydroxybutyrate_p	chromohalobacter	0.0245873	0.0592723	-0.010208	0.0810018
x2_hydroxybutyrate_p	chroococcidiopsis	-0.0301039	-0.0170909	-0.0685237	0.0344671
x2_hydroxybutyrate_p	chryseobacterium	0.126007	-0.0733075	0.106152	0.096867
x2_hydroxybutyrate_p	chthonomonas	0.0320541	0.328702	0.0257914	0.0995384
x2_hydroxybutyrate_p	citrobacter	-0.140285	-0.212467	0.016778	-0.0789488
x2_hydroxybutyrate_p	citromicrobium	-0.163487	-0.14241	-0.146984	-0.0876925
x2_hydroxybutyrate_p	clavibacter	-0.0497596	-0.137493	0.017321	0.040327
x2_hydroxybutyrate_p	cloacibacillus	0.118726	-0.113112	0.115491	0.0489222
x2_hydroxybutyrate_p	clostridioides	-0.00721396	-0.111288	-0.0925775	0.0225878
x2_hydroxybutyrate_p	clostridium	-0.0493814	-0.0880194	-0.117229	-0.0487593
x2_hydroxybutyrate_p	cnuibacter	-0.0253108	0.0282529	-0.053266	0.0938897
x2_hydroxybutyrate_p	cobetia	-0.109896	-0.0568525	-0.134441	-0.105607
x2_hydroxybutyrate_p	cohaesibacter	-0.22459	-0.220349	-0.239453	-0.105601
x2_hydroxybutyrate_p	collimonas	0.173598	0.141249	0.246077	0.170006
x2_hydroxybutyrate_p	collinsella	-0.164762	-0.0953251	-0.166042	-0.0744421
x2_hydroxybutyrate_p	colwellia	-0.126103	-0.0137811	-0.164956	-0.00673309
x2_hydroxybutyrate_p	comamonas	0.124825	0.0186815	0.029375	0.0937721
x2_hydroxybutyrate_p	conexibacter	-0.185656	0.0112549	-0.167074	-0.0282627
x2_hydroxybutyrate_p	confluentimicrobium	0.116164	-0.015598	0.0722159	0.134676
x2_hydroxybutyrate_p	congregibacter	-0.0969102	-0.0656095	-0.128848	-0.0399799
x2_hydroxybutyrate_p	coprothermobacter	-0.0928427	-0.128165	-0.1017	0.00560804
x2_hydroxybutyrate_p	coraliomargarita	0.189798	0.28477	0.186187	0.205263
x2_hydroxybutyrate_p	corallococcus	0.0326736	-0.0808042	0.000108595	0.0837361
x2_hydroxybutyrate_p	coriobacterium	-0.144175	-0.0209975	-0.085193	0.0409947
x2_hydroxybutyrate_p	corynebacterium	0.294187	-0.110222	0.363577	0.0982788
x2_hydroxybutyrate_p	coxiella	0.0859387	0.197862	0.0491937	0.219568
x2_hydroxybutyrate_p	crinalium	-0.137858	-0.130248	-0.145192	-0.0680182
x2_hydroxybutyrate_p	croceibacter	-0.019188	-0.0178654	0.0769941	0.155593
x2_hydroxybutyrate_p	croceicoccus	0.100415	0.121633	0.227507	0.131036
x2_hydroxybutyrate_p	cronobacter	-0.154146	-0.206938	0.00988217	-0.0727589
x2_hydroxybutyrate_p	cryobacterium	0.0175782	0.0660036	0.110822	0.0989411
x2_hydroxybutyrate_p	cryptobacterium	-0.363344	-0.245574	-0.392138	-0.219642
x2_hydroxybutyrate_p	cuniculiplasma	0.00945564	0.126237	0.0374111	0.241256
x2_hydroxybutyrate_p	cupriavidus	0.223712	0.108269	0.18673	0.146006
x2_hydroxybutyrate_p	curtobacterium	0.0534116	0.0484807	0.0924689	0.208834
x2_hydroxybutyrate_p	curvibacter	-0.0102366	-0.150082	-0.0241082	0.0239817
x2_hydroxybutyrate_p	cutibacterium	0.0444592	-0.13238	0.0620079	0.145898
x2_hydroxybutyrate_p	cyanobacterium	0.127141	0.252373	0.133898	0.193932
x2_hydroxybutyrate_p	cyanobium	0.207096	0.0802462	0.222349	0.163562
x2_hydroxybutyrate_p	cyanothece	0.12011	0.0383115	0.133464	0.0906771
x2_hydroxybutyrate_p	cyclobacterium	-0.025979	-0.0278894	-0.0475648	-0.0236764
x2_hydroxybutyrate_p	cycloclasticus	-0.262607	-0.157275	-0.304501	-0.152567
x2_hydroxybutyrate_p	cylindrospermum	-0.0806396	-0.0174654	-0.159907	0.0453214
x2_hydroxybutyrate_p	cystobacter	0.190866	0.17729	0.0891025	0.173755
x2_hydroxybutyrate_p	cytophaga	0.239067	0.317068	0.315035	0.335362
x2_hydroxybutyrate_p	dactylococcopsis	-0.185051	-0.138871	-0.1674	0.0409762
x2_hydroxybutyrate_p	dechloromonas	0.0711487	-0.0297508	0.0988217	0.135564
x2_hydroxybutyrate_p	deferribacter	-0.225487	-0.0736783	-0.247815	-0.0289558
x2_hydroxybutyrate_p	defluviimonas	-0.193402	-0.157233	-0.164033	-0.0513882
x2_hydroxybutyrate_p	defluviitoga	0.0323864	0.0955015	-0.0208503	0.0673653
x2_hydroxybutyrate_p	dehalobacter	-0.143263	0.0293731	-0.0305153	0.0587501
x2_hydroxybutyrate_p	dehalobacterium	-0.0224847	0.0512365	0.0904599	0.0854645
x2_hydroxybutyrate_p	dehalococcoides	-0.102339	0.0201913	-0.0657545	0.0423522
x2_hydroxybutyrate_p	dehalogenimonas	-0.194798	-0.107888	-0.268556	-0.0154205
x2_hydroxybutyrate_p	deinococcus	0.352568	-0.111577	0.384047	0.150024
x2_hydroxybutyrate_p	delftia	-0.100811	-0.0992392	-0.00488679	0.0798176
x2_hydroxybutyrate_p	denitrobacterium	0.0728589	0.0270591	0.0445241	0.0468059
x2_hydroxybutyrate_p	denitrovibrio	0.0941488	-0.0242288	0.105229	0.164516
x2_hydroxybutyrate_p	dermabacter	-0.110383	-0.0898071	-0.075148	0.12222
x2_hydroxybutyrate_p	dermacoccus	-0.186504	-0.130826	-0.198349	-0.0336422
x2_hydroxybutyrate_p	dermatophilus	0.0350426	0.0113343	0.0904599	0.0898862
x2_hydroxybutyrate_p	desulfallas	-0.0646434	0.0459191	0.0397459	0.0421361
x2_hydroxybutyrate_p	desulfarculus	-0.0982577	-0.0854223	-0.0812293	-0.0187649
x2_hydroxybutyrate_p	desulfatibacillum	0.15034	0.0933257	0.233589	0.206143
x2_hydroxybutyrate_p	desulfitobacterium	0.13252	0.0180508	0.106043	0.16121
x2_hydroxybutyrate_p	desulfobacca	0.0270976	0.097748	0.0325243	0.113893
x2_hydroxybutyrate_p	desulfobacter	0.0749152	0.0512928	0.0848672	0.12794
x2_hydroxybutyrate_p	desulfobacterium	0.23024	0.304277	0.167508	0.195087
x2_hydroxybutyrate_p	desulfobacula	-0.174339	0.0230687	-0.105935	0.0326096
x2_hydroxybutyrate_p	desulfobulbus	0.0482597	0.0605442	0.0342075	0.00602868
x2_hydroxybutyrate_p	desulfocapsa	-0.0399701	0.0247769	-0.050714	0.100206
x2_hydroxybutyrate_p	desulfococcus	0.225732	0.063061	0.164088	0.140961
x2_hydroxybutyrate_p	desulfofarcimen	-0.119118	-0.049119	-0.197318	-0.0217734
x2_hydroxybutyrate_p	desulfohalobium	0.0806967	0.183843	0.0661889	0.122297
x2_hydroxybutyrate_p	desulfomicrobium	-0.00017786	-0.0884518	-0.00982788	-0.037031
x2_hydroxybutyrate_p	desulfomonile	0.0772225	0.328231	0.0167237	0.137422
x2_hydroxybutyrate_p	desulfosporosinus	-0.0509843	-0.0793558	-0.0190585	0.123093
x2_hydroxybutyrate_p	desulfotalea	0.0367509	-0.0874501	-0.0308954	0.109813
x2_hydroxybutyrate_p	desulfotomaculum	0.217143	-0.0671358	0.211164	0.0662431
x2_hydroxybutyrate_p	desulfovibrio	0.00577157	0.356626	-0.0462616	-0.0967041
x2_hydroxybutyrate_p	desulfurella	0.145161	0.086928	0.0482706	0.182392
x2_hydroxybutyrate_p	desulfurispirillum	-0.0162784	-0.0673914	-0.0648314	-0.0132794
x2_hydroxybutyrate_p	desulfurivibrio	0.120539	0.0500505	0.0504425	0.101443
x2_hydroxybutyrate_p	desulfurobacterium	-0.260132	0.116348	-0.243145	-0.173935
x2_hydroxybutyrate_p	desulfurococcus	-0.193484	-0.113365	-0.186675	-0.145599
x2_hydroxybutyrate_p	desulfuromonas	0.107548	0.0750318	0.0507683	0.108432
x2_hydroxybutyrate_p	devosia	0.109017	0.00897137	0.0961069	0.103817
x2_hydroxybutyrate_p	devriesea	-0.0951302	-0.0839107	-0.179345	-0.0728148
x2_hydroxybutyrate_p	dialister	0.202704	0.145503	0.145898	0.0773199
x2_hydroxybutyrate_p	diaphorobacter	-0.1154	0.0645114	-0.176739	0.078447
x2_hydroxybutyrate_p	dichelobacter	-0.185014	-0.113005	-0.177825	0.00919364
x2_hydroxybutyrate_p	dickeya	-0.0298236	0.184345	0.0800891	0.0153662
x2_hydroxybutyrate_p	dictyoglomus	0.0702137	0.208147	-0.0574469	0.105987
x2_hydroxybutyrate_p	dietzia	0.00817026	0.0711763	-0.0298094	0.139723
x2_hydroxybutyrate_p	dinoroseobacter	0.0975519	0.0298743	0.0962155	0.121317
x2_hydroxybutyrate_p	dokdonella	0.0246306	0.000922385	0.0337188	0.115946
x2_hydroxybutyrate_p	dokdonia	-0.0479772	0.0351272	-0.00754738	-0.00160222
x2_hydroxybutyrate_p	dolichospermum	-0.0875458	-0.0346779	-0.0952924	0.0291401
x2_hydroxybutyrate_p	draconibacterium	0.278881	0.124685	0.24738	0.181591
x2_hydroxybutyrate_p	dyadobacter	0.312143	0.306009	0.351957	0.314003
x2_hydroxybutyrate_p	dyella	0.266471	0.164238	0.244339	0.257779
x2_hydroxybutyrate_p	echinicola	0.218515	0.0679156	0.168268	0.17426
x2_hydroxybutyrate_p	ectothiorhodospira	0.0511729	0.0572335	0.0594016	0.100139
x2_hydroxybutyrate_p	edwardsiella	-0.227596	-0.120561	-0.108161	-0.117554
x2_hydroxybutyrate_p	eggerthella	0.298743	0.187277	0.206331	0.129989
x2_hydroxybutyrate_p	ehrlichia	-0.118371	-0.00352242	-0.178694	-0.0435877
x2_hydroxybutyrate_p	eikenella	0.0672117	0.0156681	0.0662974	0.10075
x2_hydroxybutyrate_p	elizabethkingia	0.164362	0.132323	0.122713	0.0868786
x2_hydroxybutyrate_p	elusimicrobium	-0.125823	-0.102266	-0.181951	0.0426073
x2_hydroxybutyrate_p	endomicrobium	0.0632253	-0.0218465	0.0433838	0.120028
x2_hydroxybutyrate_p	endozoicomonas	0.163669	0.123936	0.189716	0.190365
x2_hydroxybutyrate_p	ensifer	-0.0598755	0.0280821	0.0183526	0.0798805
x2_hydroxybutyrate_p	enterobacter	-0.207304	-0.139554	-0.125699	-0.275669
x2_hydroxybutyrate_p	enterococcus	-0.0221737	-0.0333513	0.0605419	-0.0935549
x2_hydroxybutyrate_p	entomoplasma	-0.0942244	-0.224514	-0.13531	0.0127794
x2_hydroxybutyrate_p	epibacterium	0.0736684	0.0582846	0.141283	0.185226
x2_hydroxybutyrate_p	ereboglobus	0.258289	0.143708	0.238801	0.229633
x2_hydroxybutyrate_p	erwinia	-0.12936	-0.185179	0.0566868	-0.049248
x2_hydroxybutyrate_p	erysipelatoclostridium	-0.122568	0.423652	-0.0866048	0.24753
x2_hydroxybutyrate_p	erysipelothrix	-0.0288989	0.0793861	-0.0474562	0.0784601
x2_hydroxybutyrate_p	erythrobacter	0.320217	0.167715	0.31813	0.212087
x2_hydroxybutyrate_p	escherichia	-0.129601	-0.0579328	-0.134767	-0.177336
x2_hydroxybutyrate_p	ethanoligenens	0.0855667	-0.0793517	0.0534289	0.0857903
x2_hydroxybutyrate_p	eubacterium	0.22575	0.0483505	0.212467	0.172884
x2_hydroxybutyrate_p	euzebya	-0.0348764	-0.0845689	0.015692	0.12615
x2_hydroxybutyrate_p	exiguobacterium	0.119545	0.0698526	0.0842157	0.0829668
x2_hydroxybutyrate_p	ezakiella	0.00607941	-0.0728788	0.0672748	0.128835
x2_hydroxybutyrate_p	faecalibacterium	0.119301	-0.0663657	0.109953	0.0153662
x2_hydroxybutyrate_p	faecalibaculum	0.185213	0.00304869	0.177988	0.130477
x2_hydroxybutyrate_p	faecalitalea	0.197459	0.309215	0.0790031	0.0655373
x2_hydroxybutyrate_p	fastidiosipila	-0.232583	-0.0639768	-0.193191	-0.0254934
x2_hydroxybutyrate_p	fermentimonas	0.180742	0.198702	0.176902	0.161807
x2_hydroxybutyrate_p	ferrimonas	-0.092703	-0.0325663	-0.171689	0.059571
x2_hydroxybutyrate_p	ferroglobus	-0.154591	0.0384807	-0.115708	0.0737323
x2_hydroxybutyrate_p	ferroplasma	-0.145733	0.112242	-0.064397	0.152451
x2_hydroxybutyrate_p	fervidobacterium	0.0883815	0.0801004	-0.0221534	0.161607
x2_hydroxybutyrate_p	fibrella	0.228944	0.138337	0.289298	0.200418
x2_hydroxybutyrate_p	fibrobacter	0.193697	0.0884546	0.179562	0.166603
x2_hydroxybutyrate_p	fictibacillus	-0.146997	-0.0627934	-0.138785	-0.0468046
x2_hydroxybutyrate_p	filifactor	0.169966	0.36918	0.151436	0.17321
x2_hydroxybutyrate_p	filimonas	0.184591	0.24612	0.288049	0.225559
x2_hydroxybutyrate_p	filomicrobium	-0.0322651	0.123741	-0.0401803	0.0807277
x2_hydroxybutyrate_p	fimbriimonas	-0.0481222	-0.0240977	-0.171526	0.0392082
x2_hydroxybutyrate_p	finegoldia	0.00206646	0.0736996	-0.0130857	0.0955639
x2_hydroxybutyrate_p	fischerella	0.0602434	0.146491	0.0182983	0.105294
x2_hydroxybutyrate_p	flammeovirga	0.116455	-0.0137107	0.209752	0.167255
x2_hydroxybutyrate_p	flavisolibacter	-0.0140599	0.136062	0.0880165	0.151014
x2_hydroxybutyrate_p	flavivirga	-0.220225	0.0247352	-0.156051	-0.103946
x2_hydroxybutyrate_p	flavobacterium	0.365453	0.205125	0.350111	0.235326
x2_hydroxybutyrate_p	flavonifractor	0.115373	0.0353144	0.0708042	-0.0182983
x2_hydroxybutyrate_p	flexistipes	-0.277933	-0.13282	-0.179074	-0.0229942
x2_hydroxybutyrate_p	fluoribacter	-0.0738831	-0.126404	-0.0428409	0.0522646
x2_hydroxybutyrate_p	fluviicola	-0.0470739	0.0415683	-0.0393658	-0.0218484
x2_hydroxybutyrate_p	formosa	0.0145055	0.0480663	0.0892111	0.0952484
x2_hydroxybutyrate_p	francisella	-0.119912	0.0611959	-0.113102	0.00771027
x2_hydroxybutyrate_p	frankia	0.0456977	-0.0167894	0.0749851	0.11788
x2_hydroxybutyrate_p	frateuria	0.0899325	0.109028	0.0329587	0.0375299
x2_hydroxybutyrate_p	friedmanniella	0.0564235	-0.133894	0.0110224	0.020427
x2_hydroxybutyrate_p	frischella	-0.0574279	0.169349	-0.0926318	0.0514612
x2_hydroxybutyrate_p	frondihabitans	0.100547	0.028748	0.13607	0.228344
x2_hydroxybutyrate_p	fuerstia	0.00123506	0.147275	-0.0272574	0.016517
x2_hydroxybutyrate_p	fusobacterium	-0.160374	-0.157429	-0.0924689	-0.0687951
x2_hydroxybutyrate_p	gallibacterium	-0.0702577	0.00734838	-0.145355	-0.022449
x2_hydroxybutyrate_p	gallionella	0.306367	0.138437	0.240159	0.266339
x2_hydroxybutyrate_p	gardnerella	-0.0522226	-0.10881	-0.0824782	0.0222138
x2_hydroxybutyrate_p	geitlerinema	-0.0650404	0.194694	-0.163056	-0.0431431
x2_hydroxybutyrate_p	gemella	0.0591354	0.105101	0.046153	0.0761253
x2_hydroxybutyrate_p	geminocystis	-0.124515	-0.122489	-0.248358	-0.101863
x2_hydroxybutyrate_p	gemmata	0.146051	0.105962	0.11169	0.155256
x2_hydroxybutyrate_p	gemmatimonas	0.249374	0.221638	0.238855	0.242967
x2_hydroxybutyrate_p	gemmatirosa	-0.161973	-0.0391354	-0.136016	-0.00950235
x2_hydroxybutyrate_p	gemmobacter	-0.0640441	-0.0889188	-0.103763	0.0711779
x2_hydroxybutyrate_p	geoalkalibacter	-0.149792	-0.0740187	-0.0355107	-0.0399088
x2_hydroxybutyrate_p	geobacillus	0.168338	0.153552	0.159364	0.200304
x2_hydroxybutyrate_p	geobacter	0.280841	0.113903	0.220991	0.172721
x2_hydroxybutyrate_p	geodermatophilus	0.0626972	-0.0128136	0.037574	0.0768103
x2_hydroxybutyrate_p	geoglobus	-0.0658565	0.118879	0.0125971	0.0756604
x2_hydroxybutyrate_p	geosporobacter	-0.0566007	0.0442051	-0.0826953	0.00836184
x2_hydroxybutyrate_p	gibbsiella	-0.225807	-0.212311	-0.0916002	-0.0975292
x2_hydroxybutyrate_p	gilliamella	-0.234623	-0.136764	-0.30461	-0.146912
x2_hydroxybutyrate_p	gillisia	0.227119	0.1793	0.232014	0.270802
x2_hydroxybutyrate_p	gilvibacter	0.118026	0.100228	0.106641	0.193809
x2_hydroxybutyrate_p	glaciecola	-0.129427	0.081816	-0.126839	-0.00951168
x2_hydroxybutyrate_p	glaesserella	0.125571	0.0830502	0.128523	0.198349
x2_hydroxybutyrate_p	gloeobacter	0.118381	0.00148799	0.123039	0.182386
x2_hydroxybutyrate_p	gloeocapsa	0.110614	0.169754	0.0852473	0.163383
x2_hydroxybutyrate_p	gloeomargarita	-0.173705	-0.0353734	-0.255579	-0.110781
x2_hydroxybutyrate_p	gluconacetobacter	-0.00956167	0.0262947	-0.0636912	0.0959311
x2_hydroxybutyrate_p	gluconobacter	-0.0938817	-0.0190201	0.0418635	0.0945891
x2_hydroxybutyrate_p	glutamicibacter	-0.170277	-0.0594192	-0.212141	-0.0678003
x2_hydroxybutyrate_p	gordonia	0.000207389	-0.130404	0.0134658	0.0537004
x2_hydroxybutyrate_p	gordonibacter	0.221089	0.263883	0.155291	0.0223163
x2_hydroxybutyrate_p	gottschalkia	-0.134642	-0.0587737	-0.163545	0.00665164
x2_hydroxybutyrate_p	gramella	0.231102	0.20374	0.252593	0.152359
x2_hydroxybutyrate_p	granulibacter	0.135238	-0.0144574	0.105392	0.10333
x2_hydroxybutyrate_p	granulicella	-0.111845	0.0259472	-0.124016	0.0112671
x2_hydroxybutyrate_p	granulosicoccus	0.00788408	0.067571	-0.015149	0.1234
x2_hydroxybutyrate_p	grimontia	0.0723539	0.07157	0.000814465	0.0399674
x2_hydroxybutyrate_p	gynuella	0.0194752	0.0346058	0.033556	0.0507006
x2_hydroxybutyrate_p	haematospirillum	0.0442933	-0.0292716	0.115817	0.221833
x2_hydroxybutyrate_p	haemophilus	0.108132	-0.0382933	0.0650486	0.0358908
x2_hydroxybutyrate_p	hafnia	-0.119825	-0.0119146	-0.094858	-0.110822
x2_hydroxybutyrate_p	hahella	-0.277037	-0.225577	-0.326003	-0.142345
x2_hydroxybutyrate_p	halalkalicoccus	-0.147019	-0.0611949	-0.145952	-0.00199202
x2_hydroxybutyrate_p	halanaeroarchaeum	0.0109238	0.161063	-0.000597274	0.193836
x2_hydroxybutyrate_p	halanaerobium	0.0574576	0.0171302	0.0571754	0.166902
x2_hydroxybutyrate_p	haliangium	-0.0241025	0.0852511	0.0133029	0.0301074
x2_hydroxybutyrate_p	halioglobus	0.243384	0.283871	0.247815	0.188681
x2_hydroxybutyrate_p	haliscomenobacter	0.229294	0.15188	0.191345	0.161172
x2_hydroxybutyrate_p	haloarcula	-0.0943669	-0.118121	-0.01933	0.0402585
x2_hydroxybutyrate_p	halobacillus	-0.0894611	-0.0798413	-0.0668947	0.00765597
x2_hydroxybutyrate_p	halobacteriovorax	-0.201885	0.0147377	-0.251561	-0.0616661
x2_hydroxybutyrate_p	halobacterium	-0.100124	-0.126154	-0.138568	-0.023637
x2_hydroxybutyrate_p	halobacteroides	-0.216686	-0.0505276	-0.320465	-0.065718
x2_hydroxybutyrate_p	halobiforma	0.105069	0.123339	0.140305	0.24931
x2_hydroxybutyrate_p	halocynthiibacter	-0.0547452	-0.0815199	-0.0325786	0.161315
x2_hydroxybutyrate_p	halodesulfurarchaeum	0.0722211	0.175782	0.085736	0.198009
x2_hydroxybutyrate_p	haloferax	0.296388	0.218205	0.325352	0.2607
x2_hydroxybutyrate_p	halogeometricum	-0.195253	-0.0130315	-0.233426	-0.143941
x2_hydroxybutyrate_p	halohasta	0.0343367	0.0826441	-0.0816637	0.0244725
x2_hydroxybutyrate_p	halomicrobium	-0.355975	-0.127365	-0.384265	-0.260845
x2_hydroxybutyrate_p	halomicronema	-0.0960867	-0.151282	-0.0519629	0.0807005
x2_hydroxybutyrate_p	halomonas	0.263614	0.074009	0.192865	0.230874
x2_hydroxybutyrate_p	halopenitus	-0.296386	-0.218487	-0.29071	-0.0235902
x2_hydroxybutyrate_p	halopiger	-0.206437	-0.200298	-0.107564	0.0582479
x2_hydroxybutyrate_p	haloplanus	-0.181251	0.0380454	-0.151871	-0.00924534
x2_hydroxybutyrate_p	haloquadratum	-0.164753	-0.0774011	-0.135364	-0.0773123
x2_hydroxybutyrate_p	halorhabdus	-0.302662	-0.0307244	-0.312809	-0.161992
x2_hydroxybutyrate_p	halorhodospira	0.0345291	0.106311	0.0104252	0.0807845
x2_hydroxybutyrate_p	halorientalis	0.0453571	0.0874999	-0.0753109	0.13294
x2_hydroxybutyrate_p	halorubrum	-0.39431	-0.299101	-0.41011	-0.177844
x2_hydroxybutyrate_p	halostagnicola	-0.0870662	0.0376626	-0.0765054	0.123206
x2_hydroxybutyrate_p	halotalea	0.0402829	0.06746	0.0922517	0.0868861
x2_hydroxybutyrate_p	haloterrigena	-0.00111806	0.000367131	0.000325786	0.0376621
x2_hydroxybutyrate_p	halothece	-0.26286	-0.0994546	-0.280719	-0.10641
x2_hydroxybutyrate_p	halothermothrix	-0.150164	-0.118014	-0.151925	-0.0397668
x2_hydroxybutyrate_p	halothiobacillus	0.122265	0.143902	0.163545	0.231423
x2_hydroxybutyrate_p	hartmannibacter	-0.0624516	-0.00294741	-0.0180811	0.0477749
x2_hydroxybutyrate_p	helicobacter	0.139347	-0.108506	0.127328	0.138188
x2_hydroxybutyrate_p	heliobacterium	0.0499372	-0.0883347	0.0046696	0.0717815
x2_hydroxybutyrate_p	herbaspirillum	0.203087	0.162332	0.168594	0.190693
x2_hydroxybutyrate_p	herbinix	0.0661513	-0.0144146	0.0254656	0.0643427
x2_hydroxybutyrate_p	herbivorax	0.0282858	0.237481	-0.0405604	0.089754
x2_hydroxybutyrate_p	herminiimonas	-0.0538131	-0.0589728	-0.0486507	0.0804083
x2_hydroxybutyrate_p	hippea	-0.0953356	0.117848	-0.180757	0.0388236
x2_hydroxybutyrate_p	hirschia	-0.0993532	-0.0684924	-0.0546234	0.0977705
x2_hydroxybutyrate_p	histophilus	0.094615	0.292891	0.0418092	0.150228
x2_hydroxybutyrate_p	hoeflea	-0.134227	-0.166046	-0.175979	-0.0547067
x2_hydroxybutyrate_p	homo	-0.0155024	-0.192583	-0.00662431	0.0577184
x2_hydroxybutyrate_p	hoyosella	0.0498645	0.116252	0.0531574	0.175899
x2_hydroxybutyrate_p	hydrogenobacter	-0.0704788	0.0121151	-0.0904056	0.0139534
x2_hydroxybutyrate_p	hydrogenobaculum	-0.197426	-0.146068	-0.180866	-0.0906951
x2_hydroxybutyrate_p	hydrogenophaga	0.0514113	0.0668645	0.100179	0.072788
x2_hydroxybutyrate_p	hydrogenovibrio	-0.126908	-0.0576631	-0.2331	-0.0178623
x2_hydroxybutyrate_p	hydromonas	-0.133754	-0.125996	-0.0388771	0.105676
x2_hydroxybutyrate_p	hymenobacter	0.398839	0.143588	0.376717	0.247923
x2_hydroxybutyrate_p	hyperthermus	-0.184619	-0.0228543	-0.132975	0.0466088
x2_hydroxybutyrate_p	hyphomicrobium	0.208562	0.0965492	0.177716	0.166658
x2_hydroxybutyrate_p	hyphomonas	-0.0977244	0.0301747	-0.121735	0.00879861
x2_hydroxybutyrate_p	ichthyobacterium	-0.135494	0.00631754	-0.1693	-0.00263798
x2_hydroxybutyrate_p	idiomarina	0.125792	0.0604694	0.10208	0.124233
x2_hydroxybutyrate_p	ignavibacterium	-0.114895	-0.0402688	-0.13531	-0.0571974
x2_hydroxybutyrate_p	ignicoccus	-0.1083	0.0506926	-0.0833469	0.0639384
x2_hydroxybutyrate_p	ilyobacter	-0.210183	-0.28242	-0.0474562	-0.0117296
x2_hydroxybutyrate_p	immundisolibacter	0.163626	0.213842	0.00841614	0.0808959
x2_hydroxybutyrate_p	intestinimonas	0.0867291	-0.0637883	0.0926861	0.0712928
x2_hydroxybutyrate_p	intrasporangium	-0.20127	-0.106634	-0.172124	0.0506281
x2_hydroxybutyrate_p	isoptericola	0.0520458	0.174442	0.0345876	0.167383
x2_hydroxybutyrate_p	isosphaera	0.0418531	0.237367	-0.000217191	0.159098
x2_hydroxybutyrate_p	janibacter	0.0276127	-0.128688	0.0294293	0.0313892
x2_hydroxybutyrate_p	jannaschia	-0.202164	-0.0475567	-0.213281	0.00224369
x2_hydroxybutyrate_p	janthinobacterium	0.207084	0.110721	0.204322	0.167513
x2_hydroxybutyrate_p	jatrophihabitans	-0.022031	0.0207898	-0.029918	0.0507166
x2_hydroxybutyrate_p	jeongeupia	0.0394003	0.000873129	0.070967	0.104242
x2_hydroxybutyrate_p	jeotgalibaca	-0.00975455	0.115421	0.0135201	0.0535433
x2_hydroxybutyrate_p	jeotgalibacillus	0.107676	0.135461	0.114785	0.151929
x2_hydroxybutyrate_p	jeotgalicoccus	-0.128811	0.0804053	-0.130477	0.047919
x2_hydroxybutyrate_p	jiangella	-0.107461	0.156117	-0.0584786	0.025055
x2_hydroxybutyrate_p	jonesia	0.0712467	0.347781	0.0155291	0.140268
x2_hydroxybutyrate_p	jonquetella	0.109602	-0.077327	0.0535375	0.0840756
x2_hydroxybutyrate_p	kangiella	-0.0289507	-0.124872	-0.0300266	-0.0310583
x2_hydroxybutyrate_p	ketobacter	-0.0568184	0.133605	-0.0829125	0.0478764
x2_hydroxybutyrate_p	ketogulonicigenium	-0.221879	-0.125606	-0.171309	-0.0356191
x2_hydroxybutyrate_p	kibdelosporangium	0.00404788	0.0217263	-0.0537004	0.0892851
x2_hydroxybutyrate_p	kineococcus	0.0343525	0.0653536	0.0320899	0.165987
x2_hydroxybutyrate_p	kingella	0.214403	0.200914	0.17359	0.330972
x2_hydroxybutyrate_p	kiritimatiella	-0.119281	0.0258141	-0.0250312	0.00198375
x2_hydroxybutyrate_p	kitasatospora	-0.0341773	0.0446948	-0.0207417	0.0897512
x2_hydroxybutyrate_p	klebsiella	-0.0860737	-0.266381	-0.018244	-0.0870392
x2_hydroxybutyrate_p	kluyvera	-0.169027	-0.160692	-0.149427	-0.0751345
x2_hydroxybutyrate_p	kocuria	-0.0318296	-0.130936	-0.00733018	0.0293207
x2_hydroxybutyrate_p	komagataeibacter	0.0766771	0.0314689	0.040669	0.0924146
x2_hydroxybutyrate_p	kosakonia	-0.133653	-0.199861	0.085193	-0.0565239
x2_hydroxybutyrate_p	kosmotoga	-0.305349	-0.0837853	-0.341098	-0.144756
x2_hydroxybutyrate_p	kozakia	-0.0988999	0.209291	-0.13455	-0.00995161
x2_hydroxybutyrate_p	kribbella	-0.0101445	-0.0365356	0.00776457	-0.0154398
x2_hydroxybutyrate_p	kurthia	-0.0929582	-0.0307042	-0.117717	0.0171084
x2_hydroxybutyrate_p	kushneria	-0.203042	-0.117115	-0.263887	-0.086822
x2_hydroxybutyrate_p	kutzneria	0.0743889	0.0291641	0.0595645	0.115174
x2_hydroxybutyrate_p	kyrpidia	0.0772323	0.119111	0.0465331	0.1155
x2_hydroxybutyrate_p	kytococcus	0.0330763	-0.130751	0.0602161	0.00184893
x2_hydroxybutyrate_p	labrenzia	0.22408	0.128932	0.239996	0.17435
x2_hydroxybutyrate_p	laceyella	-0.138544	0.0288859	-0.121355	-0.0116472
x2_hydroxybutyrate_p	lachnoclostridium	-0.0740373	-0.122806	-0.0357279	-0.135527
x2_hydroxybutyrate_p	lacimicrobium	0.0467743	0.0896913	0.0566868	0.123431
x2_hydroxybutyrate_p	lacinutrix	-0.239029	-0.0935887	-0.165771	-0.102748
x2_hydroxybutyrate_p	lactobacillus	0.038436	-0.152128	0.225715	0.0311669
x2_hydroxybutyrate_p	lactococcus	0.0259103	0.219328	0.054732	0.0683608
x2_hydroxybutyrate_p	lacunisphaera	0.231302	0.189804	0.125753	0.212999
x2_hydroxybutyrate_p	laribacter	0.109988	0.00281263	0.180485	0.155688
x2_hydroxybutyrate_p	lawsonella	-0.0396242	0.0256945	-0.0686865	0.115395
x2_hydroxybutyrate_p	lawsonia	-0.175609	-0.153719	-0.143563	-0.0929285
x2_hydroxybutyrate_p	leadbetterella	0.0853061	0.173142	0.204268	0.160454
x2_hydroxybutyrate_p	leclercia	-0.194191	-0.19477	-0.10322	-0.109193
x2_hydroxybutyrate_p	legionella	0.0502256	0.175225	-0.0140631	0.000814465
x2_hydroxybutyrate_p	leifsonia	0.177286	-0.0233173	0.152848	0.0823242
x2_hydroxybutyrate_p	leisingera	-0.042035	-0.128594	-0.0332302	0.096079
x2_hydroxybutyrate_p	lelliottia	-0.223829	-0.289042	-0.0102623	-0.148993
x2_hydroxybutyrate_p	leminorella	-0.235515	-0.121486	-0.168811	-0.0669584
x2_hydroxybutyrate_p	lentibacillus	-0.113856	-0.0986406	-0.0951838	0.0246538
x2_hydroxybutyrate_p	lentzea	-0.0120095	0.0228164	-0.0718358	0.0649027
x2_hydroxybutyrate_p	leptolyngbya	0.140938	0.0220434	0.122278	0.201086
x2_hydroxybutyrate_p	leptospira	0.0188364	0.219067	-0.0480534	0.120736
x2_hydroxybutyrate_p	leptospirillum	-0.243493	-0.0858913	-0.230494	0.000163874
x2_hydroxybutyrate_p	leptothrix	0.027896	0.0932268	0.0155834	0.0396045
x2_hydroxybutyrate_p	leptotrichia	-0.151808	-0.212933	-0.0837813	-0.0490308
x2_hydroxybutyrate_p	leuconostoc	-0.0204844	-0.0430853	0.0207417	0.101374
x2_hydroxybutyrate_p	libanicoccus	0.0457216	-0.0721812	0.0414291	0.0502253
x2_hydroxybutyrate_p	liberibacter	-0.129852	-0.114945	-0.0262801	0.089782
x2_hydroxybutyrate_p	limnobaculum	-0.308935	-0.25781	-0.304718	-0.151395
x2_hydroxybutyrate_p	limnochorda	0.00503916	-0.0230603	0.0270945	0.0556853
x2_hydroxybutyrate_p	limnohabitans	0.0809204	0.110132	0.117609	0.171021
x2_hydroxybutyrate_p	listeria	0.0336469	0.0460346	-0.0110767	0.0880165
x2_hydroxybutyrate_p	luteibacter	-0.220793	-0.0962348	-0.284465	-0.0965848
x2_hydroxybutyrate_p	luteimonas	0.0638804	0.126985	0.0421893	0.198648
x2_hydroxybutyrate_p	luteipulveratus	0.0271892	0.0237578	-0.0211761	0.137415
x2_hydroxybutyrate_p	luteitalea	-0.164007	-0.0338962	-0.212412	-0.0404978
x2_hydroxybutyrate_p	lutibacter	-0.0470892	-0.0326767	-0.00743878	0.136264
x2_hydroxybutyrate_p	lysinibacillus	0.182262	0.124351	0.274963	0.226319
x2_hydroxybutyrate_p	lysobacter	0.0729152	-0.0230996	-0.0333931	0.0252762
x2_hydroxybutyrate_p	macrococcus	0.236697	0.216874	0.212684	0.201336
x2_hydroxybutyrate_p	mageeibacillus	-0.162996	-0.107965	-0.185807	-0.0402889
x2_hydroxybutyrate_p	magnetococcus	0.0561293	0.137202	0.138839	0.129731
x2_hydroxybutyrate_p	magnetospira	-0.153146	-0.0778126	-0.0752023	0.0563897
x2_hydroxybutyrate_p	magnetospirillum	0.106571	0.0398187	0.119455	0.170929
x2_hydroxybutyrate_p	mahella	0.119971	0.0356834	0.182277	0.227522
x2_hydroxybutyrate_p	mannheimia	-0.0158032	-0.0538459	-0.0174838	0.0783515
x2_hydroxybutyrate_p	maribacter	0.0179946	-0.050232	0.0584243	0.128374
x2_hydroxybutyrate_p	maricaulis	-0.126361	-0.0596935	-0.132703	0.0308644
x2_hydroxybutyrate_p	marichromatium	-0.054732	0.0174592	-0.0298094	0.018313
x2_hydroxybutyrate_p	marinilactibacillus	-0.0954411	0.157377	-0.205734	-0.0196563
x2_hydroxybutyrate_p	marinithermus	0.0876164	0.0687498	0.0390943	0.20752
x2_hydroxybutyrate_p	marinitoga	0.0351508	0.182766	-0.0150405	0.0389148
x2_hydroxybutyrate_p	marinobacter	0.202288	-0.00379279	0.13102	0.142151
x2_hydroxybutyrate_p	marinobacterium	0.0591317	0.121475	0.11636	0.137719
x2_hydroxybutyrate_p	marinomonas	0.283203	0.200354	0.307542	0.252464
x2_hydroxybutyrate_p	marinovum	-0.0018577	0.0519679	-0.0617364	0.14033
x2_hydroxybutyrate_p	mariprofundus	-0.157024	-0.0575268	-0.108595	0.0951385
x2_hydroxybutyrate_p	marivirga	-0.03416	0.0326314	-0.0278004	0.116078
x2_hydroxybutyrate_p	marivivens	-0.174907	-0.087682	-0.158495	0.0459106
x2_hydroxybutyrate_p	marmoricola	0.128202	-0.120651	0.131835	0.140058
x2_hydroxybutyrate_p	martelella	-0.0399732	-0.110448	-0.111745	-0.0411316
x2_hydroxybutyrate_p	massilia	0.252489	0.174453	0.357659	0.281913
x2_hydroxybutyrate_p	megamonas	0.0108334	0.00781806	0.00428952	0.0422979
x2_hydroxybutyrate_p	megasphaera	0.0869983	0.0295419	0.168377	0.200793
x2_hydroxybutyrate_p	meiothermus	0.110573	-0.00890006	0.104794	0.0929645
x2_hydroxybutyrate_p	melaminivora	-0.0406191	-0.0433002	0.016778	0.0953726
x2_hydroxybutyrate_p	melioribacter	0.0814978	0.118478	0.15654	0.147423
x2_hydroxybutyrate_p	melissococcus	-0.260332	-0.1123	-0.269316	-0.0857609
x2_hydroxybutyrate_p	melittangium	-0.0328798	0.0349204	-0.0316012	0.05483
x2_hydroxybutyrate_p	mesoplasma	-0.0347005	0.121972	-0.0932834	0.0506339
x2_hydroxybutyrate_p	mesorhizobium	0.0122291	-0.00299122	0.0359994	0.0593473
x2_hydroxybutyrate_p	mesotoga	-0.00955421	-0.0467086	0.0484878	0.0991452
x2_hydroxybutyrate_p	metallosphaera	-0.169765	-0.00185346	-0.146929	-0.0273033
x2_hydroxybutyrate_p	methanobacterium	-0.0498051	-0.0676955	-0.0565239	0.0956829
x2_hydroxybutyrate_p	methanobrevibacter	-0.0932817	-0.050196	-0.170115	-0.100559
x2_hydroxybutyrate_p	methanocaldococcus	-0.139592	0.00272221	-0.203996	-0.037183
x2_hydroxybutyrate_p	methanocella	-0.0117242	0.144722	0.00879622	0.0940092
x2_hydroxybutyrate_p	methanococcoides	-0.142542	-0.150449	-0.160993	0.0279629
x2_hydroxybutyrate_p	methanococcus	-0.126229	-0.0447698	-0.1314	0.050448
x2_hydroxybutyrate_p	methanocorpusculum	0.165741	0.241134	0.0439268	0.0969476
x2_hydroxybutyrate_p	methanoculleus	0.274505	-0.118113	0.279199	0.182875
x2_hydroxybutyrate_p	methanofollis	0.101903	-0.0858601	0.00977358	0.0242625
x2_hydroxybutyrate_p	methanohalobium	0.0361415	0.17936	-0.0443069	0.110397
x2_hydroxybutyrate_p	methanohalophilus	0.07921	0.0881164	0.072053	0.216569
x2_hydroxybutyrate_p	methanolacinia	-0.38788	-0.194659	-0.294673	-0.190247
x2_hydroxybutyrate_p	methanolinea	-0.192415	-0.0347462	-0.275452	-0.0929359
x2_hydroxybutyrate_p	methanolobus	0.146803	0.152505	0.0985503	0.240264
x2_hydroxybutyrate_p	methanomassiliicoccus	0.119823	0.145425	0.138405	0.259706
x2_hydroxybutyrate_p	methanomethylovorans	0.168072	0.398986	0.158441	0.174212
x2_hydroxybutyrate_p	methanoplanus	0.359005	0.314859	0.33241	0.411168
x2_hydroxybutyrate_p	methanopyrus	-0.248659	-0.0589161	-0.187924	0.0377311
x2_hydroxybutyrate_p	methanoregula	-0.160962	-0.0862476	-0.178205	-0.0995161
x2_hydroxybutyrate_p	methanosalsum	0.00623742	0.0878851	-0.00488679	0.119246
x2_hydroxybutyrate_p	methanosarcina	0.192796	0.26033	0.182223	0.1693
x2_hydroxybutyrate_p	methanosphaera	-0.207059	-0.152653	-0.234349	-0.0483093
x2_hydroxybutyrate_p	methanosphaerula	-0.284741	-0.176227	-0.288592	-0.0641957
x2_hydroxybutyrate_p	methanospirillum	-0.0940874	0.0719235	-0.0275289	0.151423
x2_hydroxybutyrate_p	methanothermobacter	0.0760886	-0.12939	0.102514	0.101971
x2_hydroxybutyrate_p	methanothermococcus	-0.184187	0.00523712	-0.216159	-0.108922
x2_hydroxybutyrate_p	methanothermus	-0.100843	0.0120918	-0.139491	-0.00838936
x2_hydroxybutyrate_p	methanothrix	-0.0552121	-0.0181521	-0.0513656	0.0655327
x2_hydroxybutyrate_p	methanotorris	-0.25229	-0.213219	-0.180431	-0.149341
x2_hydroxybutyrate_p	methylacidiphilum	-0.132954	-0.0735704	-0.0733561	0.00516006
x2_hydroxybutyrate_p	methylibium	-0.0827071	0.135739	-0.0922517	-0.0114949
x2_hydroxybutyrate_p	methylobacillus	0.00444745	0.0673372	-0.0444155	0.0392433
x2_hydroxybutyrate_p	methylobacterium	0.10567	-0.129641	0.184666	0.128305
x2_hydroxybutyrate_p	methyloceanibacter	0.000102985	0.0509223	0.0392572	0.096381
x2_hydroxybutyrate_p	methylocella	-0.104523	-0.0945455	-0.0854645	0.0981607
x2_hydroxybutyrate_p	methylococcus	0.113119	0.312888	0.0554922	0.134813
x2_hydroxybutyrate_p	methylocystis	-0.174429	-0.112061	-0.137102	0.0429883
x2_hydroxybutyrate_p	methylomicrobium	-0.143661	-0.0148073	-0.149264	0.00114286
x2_hydroxybutyrate_p	methylomonas	0.150935	0.0467508	0.14769	0.0778713
x2_hydroxybutyrate_p	methylophaga	-0.0663568	0.0257676	0.00266059	0.011621
x2_hydroxybutyrate_p	methylophilus	0.0315148	0.279229	0.0155834	0.135743
x2_hydroxybutyrate_p	methylorubrum	0.00268116	-0.134695	-0.0166694	0.00331216
x2_hydroxybutyrate_p	methylosinus	-0.00634451	0.118813	-0.00184612	0.188421
x2_hydroxybutyrate_p	methylotenera	0.145061	0.100118	0.196449	0.210852
x2_hydroxybutyrate_p	methyloversatilis	-0.228457	-0.144966	-0.196123	-0.076025
x2_hydroxybutyrate_p	methylovorus	-0.00639924	-0.0149853	-0.0785687	-0.00423568
x2_hydroxybutyrate_p	methylovulum	-0.0686727	0.110485	-0.117609	0.00450915
x2_hydroxybutyrate_p	micavibrio	-0.0640986	-0.0190448	-0.027909	0.0644863
x2_hydroxybutyrate_p	microbacterium	0.122815	-0.129948	0.0835098	0.0312212
x2_hydroxybutyrate_p	microbulbifer	0.125342	0.129554	0.116306	0.124342
x2_hydroxybutyrate_p	microcella	0.0631253	0.0464532	0.0616821	0.106418
x2_hydroxybutyrate_p	microchaete	-0.149892	-0.12907	-0.22034	-0.00217341
x2_hydroxybutyrate_p	micrococcus	0.0286356	-0.130792	0.143129	0.137156
x2_hydroxybutyrate_p	microcoleus	0.0824762	0.0476244	0.0502253	0.181732
x2_hydroxybutyrate_p	microcystis	0.0814826	0.147693	0.0541891	0.115429
x2_hydroxybutyrate_p	microlunatus	-0.132857	-0.190125	-0.0679807	0.035786
x2_hydroxybutyrate_p	micromonospora	0.113521	-0.130883	0.070967	0.0135744
x2_hydroxybutyrate_p	micropruina	0.045657	0.0172927	0.0565782	0.186161
x2_hydroxybutyrate_p	microterricola	-0.141632	-0.104288	-0.114894	0.0513935
x2_hydroxybutyrate_p	microvirga	0.116638	0.114148	0.123147	0.133301
x2_hydroxybutyrate_p	microvirgula	0.100591	0.0382155	0.144975	0.160966
x2_hydroxybutyrate_p	miniimonas	-0.0125004	0.0732101	0.0311669	0.105043
x2_hydroxybutyrate_p	mitsuaria	-0.16514	-0.10574	-0.130423	-0.0309965
x2_hydroxybutyrate_p	mobiluncus	-0.289771	-0.204362	-0.191508	-0.108733
x2_hydroxybutyrate_p	modestobacter	0.143098	0.211469	0.10474	0.215804
x2_hydroxybutyrate_p	mogibacterium	0.171742	0.160852	0.187055	0.236955
x2_hydroxybutyrate_p	monoglobus	0.14274	-0.00539154	0.134278	0.124342
x2_hydroxybutyrate_p	moorea	-0.458867	-0.37007	-0.372971	-0.186864
x2_hydroxybutyrate_p	moorella	-0.155461	-0.0361686	-0.0752566	0.0539719
x2_hydroxybutyrate_p	moraxella	0.181037	-0.0993305	0.26052	0.0828582
x2_hydroxybutyrate_p	mordavella	0.0352524	0.00569065	-0.0440354	0.028995
x2_hydroxybutyrate_p	morganella	0.101581	-0.0864248	0.15806	0.14074
x2_hydroxybutyrate_p	moritella	-0.141058	0.0382078	-0.113102	-0.0410713
x2_hydroxybutyrate_p	mucilaginibacter	0.309166	0.247403	0.314601	0.263344
x2_hydroxybutyrate_p	mucinivorans	0.291255	0.167722	0.40088	0.321714
x2_hydroxybutyrate_p	murdochiella	-0.0383946	0.154995	0.0068958	0.0799262
x2_hydroxybutyrate_p	muribaculum	0.21177	0.0218696	0.173535	0.101591
x2_hydroxybutyrate_p	muricauda	0.124131	0.126804	0.178585	0.148808
x2_hydroxybutyrate_p	mycetocola	-0.108424	-0.00873334	-0.0618993	0.0789629
x2_hydroxybutyrate_p	mycobacterium	0.0689056	0.0450147	0.130151	0.112613
x2_hydroxybutyrate_p	mycobacteroides	0.192214	-0.106063	0.0792746	0.0841614
x2_hydroxybutyrate_p	mycolicibacter	0.0586218	0.0468336	0.00276918	0.0971777
x2_hydroxybutyrate_p	mycolicibacterium	0.232742	0.0122223	0.134984	0.138568
x2_hydroxybutyrate_p	mycoplasma	-0.00195773	0.0123787	0.00342075	0.0337188
x2_hydroxybutyrate_p	myroides	0.0123638	0.0525894	0.0194929	0.0318464
x2_hydroxybutyrate_p	myxococcus	0.245749	0.129599	0.255036	0.220617
x2_hydroxybutyrate_p	nakamurella	0.132918	0.00486312	0.066406	0.149814
x2_hydroxybutyrate_p	natranaerobius	0.181766	0.185781	0.117554	0.163725
x2_hydroxybutyrate_p	natrialba	-0.05845	0.0453108	-0.110604	-0.0592197
x2_hydroxybutyrate_p	natrinema	-0.0121955	-0.0272583	-0.00157463	0.0861842
x2_hydroxybutyrate_p	natronobacterium	-0.141208	-0.014341	-0.0708042	0.0775062
x2_hydroxybutyrate_p	natronococcus	-0.161845	-0.0191442	-0.147418	0.0869244
x2_hydroxybutyrate_p	natronomonas	-0.0172566	0.0455972	-0.0537547	0.209048
x2_hydroxybutyrate_p	nautilia	0.192928	0.182408	0.159689	0.224881
x2_hydroxybutyrate_p	ndongobacter	-0.0402542	0.162774	-0.107129	0.0255206
x2_hydroxybutyrate_p	negativicoccus	0.118755	0.352059	0.193625	0.165011
x2_hydroxybutyrate_p	neisseria	0.335528	-0.00367664	0.298583	0.120215
x2_hydroxybutyrate_p	neoasaia	-0.0685549	0.114971	-0.0385513	0.0814487
x2_hydroxybutyrate_p	neomicrococcus	-0.0503951	-0.110924	-0.0983331	0.0178193
x2_hydroxybutyrate_p	neorhizobium	-0.108098	-0.104559	-0.172775	-0.0614147
x2_hydroxybutyrate_p	neorickettsia	0.11886	0.14955	0.104469	0.179374
x2_hydroxybutyrate_p	niabella	0.123507	0.23064	0.0715643	0.0997747
x2_hydroxybutyrate_p	niastella	0.021624	0.0935866	-0.0336103	0.0387184
x2_hydroxybutyrate_p	nitratifractor	-0.117821	0.060761	-0.182657	-0.0575559
x2_hydroxybutyrate_p	nitratireductor	0.104464	0.0231311	0.0267145	0.0804236
x2_hydroxybutyrate_p	nitratiruptor	-0.145169	0.00501053	-0.205245	0.0123338
x2_hydroxybutyrate_p	nitrobacter	-0.120284	-0.0143301	-0.090297	0.0608709
x2_hydroxybutyrate_p	nitrosococcus	-0.206331	0.157055	-0.24586	-0.110748
x2_hydroxybutyrate_p	nitrosomonas	-0.134409	-0.139328	-0.054352	-0.00222626
x2_hydroxybutyrate_p	nitrosopumilus	-0.259519	-0.188208	-0.263398	-0.150924
x2_hydroxybutyrate_p	nitrososphaera	-0.200099	-0.155509	-0.218005	-0.0376344
x2_hydroxybutyrate_p	nitrosospira	-0.203645	-0.0301863	-0.178748	-0.0722355
x2_hydroxybutyrate_p	nitrospira	0.09889	0.00694537	0.0521801	0.132653
x2_hydroxybutyrate_p	nitrospirillum	0.283525	0.259516	0.266384	0.259668
x2_hydroxybutyrate_p	niveispirillum	-0.0180365	0.128649	-0.00217191	0.108726
x2_hydroxybutyrate_p	nocardia	0.232441	0.119743	0.273877	0.237552
x2_hydroxybutyrate_p	nocardioides	0.282272	0.133156	0.264158	0.213444
x2_hydroxybutyrate_p	nocardiopsis	0.0713465	-0.0457422	0.0112396	0.0728151
x2_hydroxybutyrate_p	nodularia	-0.304475	-0.198724	-0.270511	-0.0578191
x2_hydroxybutyrate_p	nonlabens	0.285314	0.177313	0.366781	0.258185
x2_hydroxybutyrate_p	nonomuraea	0.134375	0.166429	0.0364337	0.0789603
x2_hydroxybutyrate_p	nostoc	0.24191	0.135363	0.270891	0.255362
x2_hydroxybutyrate_p	novibacillus	0.076287	0.297154	0.0371939	0.14643
x2_hydroxybutyrate_p	novosphingobium	0.162203	-0.003629	0.148287	0.146698
x2_hydroxybutyrate_p	obesumbacterium	-0.16131	-0.0688943	-0.00716729	-0.0105953
x2_hydroxybutyrate_p	oblitimonas	0.151023	0.171006	0.103003	0.191343
x2_hydroxybutyrate_p	oceanicoccus	0.214046	0.327676	0.176739	0.378877
x2_hydroxybutyrate_p	oceanimonas	0.10747	0.0891579	0.0820438	0.116717
x2_hydroxybutyrate_p	oceanisphaera	-0.0463065	0.0403821	-0.0232394	0.0752466
x2_hydroxybutyrate_p	oceanithermus	-0.0703962	-0.0861512	-0.0280719	0.0685311
x2_hydroxybutyrate_p	oceanobacillus	0.0233239	0.00839291	0.038117	0.0944339
x2_hydroxybutyrate_p	ochrobactrum	0.22624	0.172985	0.169354	0.190585
x2_hydroxybutyrate_p	octadecabacter	0.154945	0.100463	0.118858	0.177317
x2_hydroxybutyrate_p	odoribacter	0.204545	-0.0438385	0.129283	0.117772
x2_hydroxybutyrate_p	oenococcus	-0.0178971	0.107697	-0.00352935	0.19767
x2_hydroxybutyrate_p	oleiphilus	0.247388	0.201754	0.163979	0.246065
x2_hydroxybutyrate_p	oleispira	0.105672	0.170992	0.129826	0.246156
x2_hydroxybutyrate_p	oligella	-0.003783	-0.0279269	-0.0620622	-0.0752647
x2_hydroxybutyrate_p	oligotropha	-0.00889499	0.0826355	-0.0266602	0.0976385
x2_hydroxybutyrate_p	olleya	-0.0243865	0.260741	0.0831297	0.187341
x2_hydroxybutyrate_p	olsenella	-0.028013	-0.135499	0.053809	0.0125428
x2_hydroxybutyrate_p	opitutus	0.152211	0.198712	0.127165	0.179421
x2_hydroxybutyrate_p	orientia	0.0989328	0.237201	0.076614	0.145802
x2_hydroxybutyrate_p	ornithobacterium	0.0761813	0.159965	0.127165	0.0610849
x2_hydroxybutyrate_p	orrella	-0.0836299	0.0184073	-0.103817	0.0405678
x2_hydroxybutyrate_p	oscillatoria	-0.118633	-0.0214084	-0.1314	0.0270116
x2_hydroxybutyrate_p	oscillibacter	0.0058492	-0.192999	-0.0263887	-0.0374111
x2_hydroxybutyrate_p	ottowia	0.214907	-0.11789	0.263344	0.148056
x2_hydroxybutyrate_p	owenweeksia	0.113569	0.0995854	0.160178	0.145846
x2_hydroxybutyrate_p	oxalobacter	0.145779	0.212888	0.0493566	0.108733
x2_hydroxybutyrate_p	paenalcaligenes	-0.160027	-0.0151876	-0.0784058	-0.0686661
x2_hydroxybutyrate_p	paenarthrobacter	-0.066826	0.0156281	-0.107075	0.0210185
x2_hydroxybutyrate_p	paenibacillus	0.193424	0.127005	0.309605	0.1674
x2_hydroxybutyrate_p	paeniclostridium	-0.146033	-0.0839409	-0.126894	-0.114677
x2_hydroxybutyrate_p	pajaroellobacter	-0.0723476	0.0224433	-0.0747679	0.0667752
x2_hydroxybutyrate_p	palaeococcus	0.20678	0.30029	0.200793	0.372469
x2_hydroxybutyrate_p	paludibacter	0.228655	0.173143	0.29033	0.186044
x2_hydroxybutyrate_p	paludisphaera	0.0980793	0.0362042	0.116088	0.111177
x2_hydroxybutyrate_p	pandoraea	0.131991	0.0794417	0.156649	0.161536
x2_hydroxybutyrate_p	pannonibacter	0.059849	-0.021787	0.0298094	0.163273
x2_hydroxybutyrate_p	pantoea	-0.112967	-0.194087	0.0475648	-0.0593473
x2_hydroxybutyrate_p	parabacteroides	0.0322979	-0.119174	-0.0128142	-0.0968127
x2_hydroxybutyrate_p	paraburkholderia	0.028085	-0.00486533	0.037574	0.0900255
x2_hydroxybutyrate_p	parachlamydia	-0.325066	-0.155624	-0.345387	-0.23166
x2_hydroxybutyrate_p	paracoccus	0.0578752	-0.139478	-0.00255199	-0.0648314
x2_hydroxybutyrate_p	parageobacillus	-0.0909596	-0.0832132	-0.120269	0.0328501
x2_hydroxybutyrate_p	paraglaciecola	-0.172223	-0.0895538	-0.159092	0.00857536
x2_hydroxybutyrate_p	paraliobacillus	-0.163722	-0.0436128	-0.235652	-0.0123443
x2_hydroxybutyrate_p	paraoerskovia	-0.156294	-0.0479009	-0.144975	0.08516
x2_hydroxybutyrate_p	paraphotobacterium	-0.39202	-0.278614	-0.301243	-0.240186
x2_hydroxybutyrate_p	pararhodospirillum	-0.181736	-0.129498	-0.193354	-0.0587789
x2_hydroxybutyrate_p	parasaccharibacter	0.152006	0.138283	0.15806	0.123941
x2_hydroxybutyrate_p	parascardovia	-0.0930349	-0.0401913	-0.133627	0.0204436
x2_hydroxybutyrate_p	parvibaculum	0.00622936	-0.12678	0.0563067	0.141972
x2_hydroxybutyrate_p	parvimonas	-0.0370937	-0.104971	0.00450671	0.0409144
x2_hydroxybutyrate_p	parvularcula	-0.35319	-0.292362	-0.304067	-0.151556
x2_hydroxybutyrate_p	pasteurella	0.321424	0.268361	0.242982	0.284085
x2_hydroxybutyrate_p	paucibacter	0.0608656	0.104807	0.0926318	0.131057
x2_hydroxybutyrate_p	paucimonas	0.207002	0.212832	0.153662	0.242125
x2_hydroxybutyrate_p	pectobacterium	0.0741312	0.147821	0.174513	0.140251
x2_hydroxybutyrate_p	pediococcus	0.0419242	0.0274757	0.0493023	0.122115
x2_hydroxybutyrate_p	pedobacter	0.244442	0.115157	0.274529	0.204431
x2_hydroxybutyrate_p	pelagibaca	-0.143979	0.153285	-0.236901	-0.0246887
x2_hydroxybutyrate_p	pelagibacterium	0.135505	0.0478093	0.119944	0.175594
x2_hydroxybutyrate_p	pelobacter	0.18063	0.0488832	0.18244	0.151599
x2_hydroxybutyrate_p	pelodictyon	0.188162	0.237514	0.2451	0.252457
x2_hydroxybutyrate_p	pelosinus	-0.0475644	-0.0252154	-0.0513656	0.0210675
x2_hydroxybutyrate_p	peptoclostridium	-0.0510974	-0.0810108	-0.00966498	0.0932834
x2_hydroxybutyrate_p	peptoniphilus	-0.0779425	-0.00948162	-0.141663	0.0091773
x2_hydroxybutyrate_p	persephonella	-0.34297	-0.236706	-0.394255	-0.279825
x2_hydroxybutyrate_p	persicobacter	0.161734	0.011237	0.131563	0.123975
x2_hydroxybutyrate_p	petrimonas	0.22968	0.0370535	0.237064	0.0708585
x2_hydroxybutyrate_p	petrotoga	0.0791646	0.166469	0.0562524	0.105023
x2_hydroxybutyrate_p	phaeobacter	0.316191	0.194579	0.252158	0.248629
x2_hydroxybutyrate_p	phenylobacterium	0.24242	0.0920191	0.184232	0.19506
x2_hydroxybutyrate_p	phoenicibacter	0.143313	0.346363	0.119509	0.129884
x2_hydroxybutyrate_p	photobacterium	-0.120002	-0.0433399	-0.119944	-0.086822
x2_hydroxybutyrate_p	photorhabdus	-0.17782	-0.0362661	-0.157355	-0.068254
x2_hydroxybutyrate_p	phreatobacter	-0.0116645	0.109065	-0.0262801	0.0419949
x2_hydroxybutyrate_p	phycicoccus	0.294945	0.293267	0.307433	0.36411
x2_hydroxybutyrate_p	phycisphaera	0.246314	0.118993	0.242602	0.218049
x2_hydroxybutyrate_p	phyllobacterium	0.0216756	0.0317379	-0.112179	0.0542172
x2_hydroxybutyrate_p	phytobacter	-0.42006	-0.238044	-0.480426	-0.407465
x2_hydroxybutyrate_p	picrophilus	0.136454	0.305001	0.0911658	0.221037
x2_hydroxybutyrate_p	pimelobacter	0.121178	0.0975735	0.17701	0.268267
x2_hydroxybutyrate_p	pirellula	-0.15269	-0.0456257	-0.151816	0.0452217
x2_hydroxybutyrate_p	piscirickettsia	-0.338278	-0.279598	-0.353315	-0.206013
x2_hydroxybutyrate_p	planctomyces	-0.0533821	-0.0501187	-0.0378455	0.0489235
x2_hydroxybutyrate_p	planctopirus	0.0727692	0.0715806	0.0665689	0.149818
x2_hydroxybutyrate_p	planktomarina	0.106551	0.354704	0.0522887	0.202302
x2_hydroxybutyrate_p	planktothrix	0.0421421	-0.0994528	-0.0361622	0.0923631
x2_hydroxybutyrate_p	planococcus	-0.0487624	0.0264379	-0.0794918	0.00678721
x2_hydroxybutyrate_p	plantactinospora	0.0455985	0.0395217	-0.0247597	0.118264
x2_hydroxybutyrate_p	plantibacter	-0.0580513	0.0444586	0.00146604	0.109864
x2_hydroxybutyrate_p	plesiomonas	-0.235298	-0.162594	-0.206766	-0.193429
x2_hydroxybutyrate_p	pleurocapsa	-0.17146	0.0382291	-0.21958	-0.103915
x2_hydroxybutyrate_p	pluralibacter	-0.208783	-0.182913	-0.0608134	-0.171689
x2_hydroxybutyrate_p	polaribacter	0.156268	0.203704	0.250421	0.155671
x2_hydroxybutyrate_p	polaromonas	-0.149419	-0.0190402	-0.080632	0.0518683
x2_hydroxybutyrate_p	polymorphum	-0.00987075	0.0464965	-0.03904	0.070211
x2_hydroxybutyrate_p	polynucleobacter	0.0436414	0.137441	0.0905142	0.130399
x2_hydroxybutyrate_p	pontibacter	0.154372	0.11541	0.218005	0.186295
x2_hydroxybutyrate_p	pontimonas	-0.0735368	0.00999374	-0.159635	0.0516292
x2_hydroxybutyrate_p	porphyrobacter	0.208684	0.085279	0.205137	0.230088
x2_hydroxybutyrate_p	porphyromonas	0.150852	-0.1373	0.276321	0.0639084
x2_hydroxybutyrate_p	pragia	-0.328289	-0.181456	-0.374274	-0.149712
x2_hydroxybutyrate_p	prauserella	0.0809267	0.352471	0.020253	0.185172
x2_hydroxybutyrate_p	prevotella	0.22636	0.0978731	0.250041	0.200195
x2_hydroxybutyrate_p	prochlorococcus	0.00357001	0.191191	-0.0741706	0.146535
x2_hydroxybutyrate_p	propionibacterium	-0.275532	-0.153622	-0.294836	-0.202422
x2_hydroxybutyrate_p	propionimicrobium	0.0586681	-0.0771499	0.0955096	0.0308962
x2_hydroxybutyrate_p	prosthecochloris	0.241203	0.173806	0.288429	0.250312
x2_hydroxybutyrate_p	proteiniphilum	0.250504	0.110494	0.247163	0.153934
x2_hydroxybutyrate_p	proteus	-0.0591441	-0.0602463	0.0485421	0.0402628
x2_hydroxybutyrate_p	providencia	0.0418975	0.102795	0.0179182	0.0447413
x2_hydroxybutyrate_p	pseudanabaena	-0.0994891	0.038885	-0.0879079	0.103344
x2_hydroxybutyrate_p	pseudarcicella	0.231315	0.154185	0.214313	0.195293
x2_hydroxybutyrate_p	pseudarthrobacter	0.150638	0.113645	0.12836	0.13026
x2_hydroxybutyrate_p	pseudoalteromonas	0.049359	0.0245691	0.0328501	0.117663
x2_hydroxybutyrate_p	pseudodesulfovibrio	-0.136664	-0.0856915	-0.185046	-0.105663
x2_hydroxybutyrate_p	pseudogulbenkiania	-0.262163	-0.0517027	-0.261117	-0.0427334
x2_hydroxybutyrate_p	pseudohongiella	0.0787456	0.0170086	-0.00819895	0.0839729
x2_hydroxybutyrate_p	pseudomonas	0.178187	-0.0759678	0.241245	0.0359994
x2_hydroxybutyrate_p	pseudonocardia	0.114386	-0.129957	0.0703698	0.0435857
x2_hydroxybutyrate_p	pseudopedobacter	0.271131	0.246727	0.271597	0.198185
x2_hydroxybutyrate_p	pseudopropionibacterium	0.0584583	0.228114	-0.00640712	0.114785
x2_hydroxybutyrate_p	pseudorhodoplanes	-0.0582305	-0.150253	-0.0612478	0.0689797
x2_hydroxybutyrate_p	pseudothermotoga	-0.0950231	0.0409066	-0.0661346	0.0609579
x2_hydroxybutyrate_p	pseudovibrio	0.152138	-0.00867284	0.0904599	0.202532
x2_hydroxybutyrate_p	pseudoxanthomonas	0.0949761	-0.129608	0.0118912	0.0183003
x2_hydroxybutyrate_p	psychrobacter	0.285878	0.204007	0.187001	0.232047
x2_hydroxybutyrate_p	psychroflexus	0.250619	0.237837	0.159744	0.160629
x2_hydroxybutyrate_p	psychromonas	-0.129971	-0.0618447	-0.174676	0.0593796
x2_hydroxybutyrate_p	pusillimonas	-0.0150581	0.00544056	0.0477819	0.0796979
x2_hydroxybutyrate_p	pyrobaculum	-0.220583	-0.224136	-0.135961	-0.236997
x2_hydroxybutyrate_p	pyrococcus	-0.0678023	0.0103234	-0.0471304	0.118056
x2_hydroxybutyrate_p	pyrodictium	-0.11618	-0.0583122	-0.155997	-0.0201863
x2_hydroxybutyrate_p	pyrolobus	-0.0601981	0.325108	-0.0599446	0.151841
x2_hydroxybutyrate_p	rahnella	-0.233573	-0.210689	-0.250801	-0.1199
x2_hydroxybutyrate_p	ralstonia	0.0588771	0.0541391	0.0944779	0.117392
x2_hydroxybutyrate_p	ramlibacter	-0.0200281	-0.130631	-0.0344247	-0.0156937
x2_hydroxybutyrate_p	raoultella	-0.273377	-0.271947	-0.206005	-0.240213
x2_hydroxybutyrate_p	raphidiopsis	-0.0666476	0.118941	-0.144323	-0.0101176
x2_hydroxybutyrate_p	rathayibacter	-0.386027	-0.171836	-0.357713	-0.161336
x2_hydroxybutyrate_p	reinekea	0.037115	0.142922	0.065483	0.227229
x2_hydroxybutyrate_p	renibacterium	0.0794461	0.14804	0.0714557	0.167624
x2_hydroxybutyrate_p	rhizobacter	0.0111993	0.0155415	0.0147147	0.130041
x2_hydroxybutyrate_p	rhizobium	0.293712	0.102713	0.304121	0.187001
x2_hydroxybutyrate_p	rhizorhabdus	-0.21904	-0.115743	-0.264267	-0.066062
x2_hydroxybutyrate_p	rhodanobacter	-0.0212727	-0.00590051	-0.0322528	0.0617806
x2_hydroxybutyrate_p	rhodobaca	0.00156351	0.0659062	-0.0200901	0.120212
x2_hydroxybutyrate_p	rhodobacter	0.179084	0.133344	0.134767	0.150079
x2_hydroxybutyrate_p	rhodococcus	0.246365	0.0208449	0.188521	0.13607
x2_hydroxybutyrate_p	rhodoferax	-0.080961	0.0831213	0.0484878	0.100722
x2_hydroxybutyrate_p	rhodoluna	0.111667	0.0787436	0.0658088	0.192599
x2_hydroxybutyrate_p	rhodomicrobium	-0.0907173	-0.0357334	-0.086279	0.00991875
x2_hydroxybutyrate_p	rhodopirellula	0.0135793	0.131832	-0.0150948	0.0695047
x2_hydroxybutyrate_p	rhodoplanes	0.125711	0.0946346	0.129228	0.200087
x2_hydroxybutyrate_p	rhodopseudomonas	0.130666	-0.00799818	0.053809	0.078598
x2_hydroxybutyrate_p	rhodospirillum	0.0561897	-0.0395831	0.00130314	0.0695525
x2_hydroxybutyrate_p	rhodothermus	0.186145	0.0502783	0.16235	0.139583
x2_hydroxybutyrate_p	rhodovulum	-0.203801	0.0961794	-0.195037	0.0312296
x2_hydroxybutyrate_p	rickettsia	-0.0376734	-0.0145596	0.0262258	0.0584306
x2_hydroxybutyrate_p	riemerella	-0.0156122	0.0340314	0.00993647	0.0857035
x2_hydroxybutyrate_p	rivularia	0.182948	0.380436	0.177608	0.345836
x2_hydroxybutyrate_p	robiginitalea	0.147882	0.130809	0.203453	0.274135
x2_hydroxybutyrate_p	roseateles	-0.29947	-0.158013	-0.267416	-0.0621062
x2_hydroxybutyrate_p	roseburia	0.111691	0.0295367	0.0668947	0.0785687
x2_hydroxybutyrate_p	roseibacterium	-0.0743171	-0.0399742	-0.0663517	0.0439688
x2_hydroxybutyrate_p	roseiflexus	-0.0721139	-0.021603	-0.00754738	0.0305319
x2_hydroxybutyrate_p	roseobacter	0.141603	0.194282	0.192702	0.24661
x2_hydroxybutyrate_p	roseomonas	0.055434	0.0168685	0.0556008	0.0917112
x2_hydroxybutyrate_p	roseovarius	0.0379967	0.00386895	-0.0554379	0.0438527
x2_hydroxybutyrate_p	rothia	-0.00771575	-0.166372	0.0351849	-0.0178639
x2_hydroxybutyrate_p	rouxiella	0.00226758	-0.105567	0.0165065	0.0337188
x2_hydroxybutyrate_p	rubinisphaera	0.0142387	0.078484	-0.0341532	0.147301
x2_hydroxybutyrate_p	rubrivivax	-0.172193	-0.0885385	-0.123147	-0.0226637
x2_hydroxybutyrate_p	rubrobacter	0.0941008	-0.102098	0.11093	0.107023
x2_hydroxybutyrate_p	ruegeria	0.079838	0.0751963	0.0068958	0.0841705
x2_hydroxybutyrate_p	rufibacter	0.286423	0.0898679	0.244774	0.211794
x2_hydroxybutyrate_p	ruminiclostridium	0.0718203	-0.0636307	0.14731	0.0820438
x2_hydroxybutyrate_p	ruminococcus	0.238447	0.222112	0.180757	0.139328
x2_hydroxybutyrate_p	rummeliibacillus	-0.13961	-0.162304	-0.15578	-0.0285412
x2_hydroxybutyrate_p	runella	0.185809	0.148622	0.203671	0.185209
x2_hydroxybutyrate_p	saccharomonospora	0.0184526	-0.0395342	0.0068958	0.0339913
x2_hydroxybutyrate_p	saccharophagus	0.255614	0.154968	0.269154	0.243859
x2_hydroxybutyrate_p	saccharopolyspora	-0.00848925	-0.0454075	-0.0146061	0.158891
x2_hydroxybutyrate_p	saccharothrix	-0.106278	0.163703	-0.124613	0.0339676
x2_hydroxybutyrate_p	sagittula	-0.15759	-0.115283	-0.191291	-0.0661331
x2_hydroxybutyrate_p	salegentibacter	0.13407	0.0488683	0.125916	0.160466
x2_hydroxybutyrate_p	salimicrobium	-0.0538491	0.0592277	-0.0605419	0.104634
x2_hydroxybutyrate_p	salinarchaeum	-0.0789361	-0.00735331	-0.0960526	0.0433224
x2_hydroxybutyrate_p	salinibacter	0.133417	0.0361023	0.128631	0.0989411
x2_hydroxybutyrate_p	salinibacterium	0.0213276	0.0640034	0.0334474	0.0875294
x2_hydroxybutyrate_p	salinicoccus	0.0284241	0.159423	0.0951295	0.220508
x2_hydroxybutyrate_p	salinicola	-0.194081	-0.119648	-0.162133	-0.0361716
x2_hydroxybutyrate_p	salinigranum	0.115555	0.0555513	0.0675463	0.108028
x2_hydroxybutyrate_p	salinimonas	0.102932	0.188692	0.192159	0.139114
x2_hydroxybutyrate_p	salinisphaera	0.0161866	0.0943651	0.0275832	0.182322
x2_hydroxybutyrate_p	salinispira	0.299646	0.168985	0.257642	0.238214
x2_hydroxybutyrate_p	salinispora	-0.197941	-0.222894	-0.202204	-0.0392978
x2_hydroxybutyrate_p	salinivirga	0.0372809	0.106558	0.0637998	0.128802
x2_hydroxybutyrate_p	salipiger	0.0405968	0.000927771	0.0628224	0.0860682
x2_hydroxybutyrate_p	salmonella	-0.144491	-0.200268	-0.085193	-0.140468
x2_hydroxybutyrate_p	sandaracinus	0.0696949	0.223824	0.0744421	0.111498
x2_hydroxybutyrate_p	sanguibacter	-0.063469	-0.0472926	-0.0540805	0.0347435
x2_hydroxybutyrate_p	saprospira	-0.0788468	-0.0368167	-0.101971	0.0649253
x2_hydroxybutyrate_p	scardovia	-0.0127841	0.0464178	-0.164902	0.00165987
x2_hydroxybutyrate_p	scytonema	-0.247446	0.183562	-0.266059	-0.177532
x2_hydroxybutyrate_p	sebaldella	-0.0791851	-0.131091	0.040126	-0.0583987
x2_hydroxybutyrate_p	sedimenticola	-0.0475782	0.096911	-0.175653	0.00518557
x2_hydroxybutyrate_p	sediminicola	-0.0307582	-0.0246594	-0.102785	-0.00147083
x2_hydroxybutyrate_p	sediminispirochaeta	0.17749	0.179078	0.109247	0.135961
x2_hydroxybutyrate_p	segniliparus	-0.106487	-0.00178408	-0.0575555	0.103731
x2_hydroxybutyrate_p	selenomonas	0.228188	-0.0641707	0.222512	0.0759624
x2_hydroxybutyrate_p	seonamhaeicola	-0.255186	-0.098052	-0.268936	-0.117407
x2_hydroxybutyrate_p	serinicoccus	-0.0899094	-0.0280382	-0.0984417	-0.0060204
x2_hydroxybutyrate_p	serratia	-0.0997716	-0.150018	0.197046	-0.068958
x2_hydroxybutyrate_p	shewanella	0.105693	0.0810481	0.0809035	0.0926861
x2_hydroxybutyrate_p	shigella	-0.151898	-0.150448	-0.189227	-0.179279
x2_hydroxybutyrate_p	shimwellia	-0.137236	-0.190673	-0.097953	-0.0997747
x2_hydroxybutyrate_p	shinella	0.0961195	0.0491568	0.0812836	0.20196
x2_hydroxybutyrate_p	siansivirga	0.12375	0.264179	0.101048	0.15992
x2_hydroxybutyrate_p	sideroxydans	0.00394509	0.0100887	0.0263887	0.0625849
x2_hydroxybutyrate_p	simiduia	0.0207518	0.0444015	-0.0260629	0.0627206
x2_hydroxybutyrate_p	simkania	-0.0310724	0.0381305	-0.158278	0.0412353
x2_hydroxybutyrate_p	simonsiella	0.00635884	0.0388943	-0.0687951	0.035598
x2_hydroxybutyrate_p	simplicispira	-0.074834	0.0162486	-0.0952381	0.0996799
x2_hydroxybutyrate_p	singulisphaera	0.191537	0.0320859	0.171363	0.22267
x2_hydroxybutyrate_p	sinomonas	-0.165671	-0.0716619	-0.149427	-0.0127472
x2_hydroxybutyrate_p	sinorhizobium	0.20898	0.191794	0.106966	0.192377
x2_hydroxybutyrate_p	slackia	0.0472863	0.0380692	0.0628767	0.0845415
x2_hydroxybutyrate_p	sneathia	-0.277139	-0.240679	-0.258022	-0.170336
x2_hydroxybutyrate_p	snodgrassella	-0.0215664	0.352898	-0.102351	0.00578286
x2_hydroxybutyrate_p	sodalis	-0.115397	0.215457	-0.134007	-0.0704784
x2_hydroxybutyrate_p	solibacillus	0.185989	0.249396	0.242005	0.163436
x2_hydroxybutyrate_p	solitalea	0.013416	0.197989	0.0834012	0.119567
x2_hydroxybutyrate_p	sorangium	0.216436	0.0879955	0.229951	0.21339
x2_hydroxybutyrate_p	sphaerobacter	0.0713975	0.0764004	0.046153	0.133178
x2_hydroxybutyrate_p	sphaerochaeta	-0.133148	-0.0283638	-0.0912744	0.00271488
x2_hydroxybutyrate_p	sphaerospermopsis	-0.0848635	0.0613148	-0.111853	-0.0757752
x2_hydroxybutyrate_p	sphingobacterium	0.305511	0.228967	0.282456	0.206168
x2_hydroxybutyrate_p	sphingobium	0.283055	0.0885869	0.227507	0.201227
x2_hydroxybutyrate_p	sphingomonas	0.289104	-0.135289	0.282402	0.083184
x2_hydroxybutyrate_p	sphingopyxis	0.0804655	0.123886	0.0824239	0.126622
x2_hydroxybutyrate_p	sphingorhabdus	0.29419	0.165121	0.249661	0.20682
x2_hydroxybutyrate_p	spiribacter	0.00957089	0.0720973	0.00532117	0.105633
x2_hydroxybutyrate_p	spirochaeta	0.229939	0.0938354	0.253136	0.208047
x2_hydroxybutyrate_p	spiroplasma	-0.108004	-0.0505801	-0.0841071	0.0174838
x2_hydroxybutyrate_p	spirosoma	0.406101	-0.0523005	0.384808	0.208394
x2_hydroxybutyrate_p	spongiibacter	0.013926	0.14379	0.000597274	0.149402
x2_hydroxybutyrate_p	spongiibacterium	0.281023	0.286309	0.248466	0.259467
x2_hydroxybutyrate_p	sporosarcina	0.0962351	0.162045	0.123093	0.168974
x2_hydroxybutyrate_p	stackebrandtia	0.0475804	0.0182141	0.0189499	0.184599
x2_hydroxybutyrate_p	stanieria	0.0492605	0.0438749	0.0305153	0.137658
x2_hydroxybutyrate_p	staphylococcus	-0.037159	-0.131819	-0.0416463	-0.0469132
x2_hydroxybutyrate_p	staphylothermus	-0.255146	-0.21635	-0.262475	-0.173572
x2_hydroxybutyrate_p	stappia	-0.00299584	0.0115286	-0.0184612	0.139793
x2_hydroxybutyrate_p	starkeya	-0.140091	-0.0783719	-0.160612	-0.0422431
x2_hydroxybutyrate_p	stenotrophomonas	0.416075	-0.0422463	0.388337	0.132921
x2_hydroxybutyrate_p	steroidobacter	-0.00407149	0.0380938	-0.113265	0.124138
x2_hydroxybutyrate_p	stigmatella	0.191479	0.100049	0.0854645	0.165345
x2_hydroxybutyrate_p	streptobacillus	-0.0958732	0.0816488	-0.0763425	-0.0277491
x2_hydroxybutyrate_p	streptococcus	-0.00623078	-0.135435	-0.0424065	-0.0920345
x2_hydroxybutyrate_p	streptomyces	0.301891	0.101677	0.324917	0.205028
x2_hydroxybutyrate_p	streptosporangium	0.136136	0.0318299	0.166694	0.10953
x2_hydroxybutyrate_p	sulfitobacter	-0.0220163	-0.0312963	-0.0679264	0.062483
x2_hydroxybutyrate_p	sulfolobus	-0.410331	-0.299641	-0.332356	-0.243493
x2_hydroxybutyrate_p	sulfuricaulis	-0.0280484	0.0497695	-0.0223706	0.0455262
x2_hydroxybutyrate_p	sulfuricella	-0.0351684	0.0609648	0.0199815	0.132593
x2_hydroxybutyrate_p	sulfuricurvum	-0.196019	-0.232189	-0.089374	-0.00892551
x2_hydroxybutyrate_p	sulfuriferula	0.0138055	-0.000365877	0.0209046	0.142966
x2_hydroxybutyrate_p	sulfurifustis	-0.0935485	-0.128442	-0.0401803	0.0950569
x2_hydroxybutyrate_p	sulfurihydrogenibium	-0.216243	-0.00768745	-0.288266	-0.0607651
x2_hydroxybutyrate_p	sulfurimonas	0.122432	0.048132	0.181354	0.193929
x2_hydroxybutyrate_p	sulfuritalea	0.127233	0.239058	0.163979	0.177541
x2_hydroxybutyrate_p	sulfurospirillum	-0.0208381	0.055888	-0.0245425	0.0759081
x2_hydroxybutyrate_p	sulfurovum	-0.163758	0.0644616	-0.228702	-0.0804236
x2_hydroxybutyrate_p	symbiobacterium	0.142716	0.00455812	0.162024	0.107241
x2_hydroxybutyrate_p	synechococcus	0.335103	0.10046	0.27328	0.176522
x2_hydroxybutyrate_p	synechocystis	0.156029	0.301696	0.158386	0.19548
x2_hydroxybutyrate_p	syntrophobacter	0.14841	0.0908976	0.171581	0.214806
x2_hydroxybutyrate_p	syntrophobotulus	-0.150731	-0.171294	-0.184178	-0.0118912
x2_hydroxybutyrate_p	syntrophomonas	0.0977958	0.0597427	0.108215	0.164512
x2_hydroxybutyrate_p	syntrophothermus	-0.104138	0.020501	-0.188359	-0.0495949
x2_hydroxybutyrate_p	syntrophus	-0.168022	0.000286914	-0.116197	0.0213991
x2_hydroxybutyrate_p	tamlana	-0.0230154	0.209146	-0.0140631	0.0175105
x2_hydroxybutyrate_p	tannerella	0.318626	0.212562	0.330293	0.243634
x2_hydroxybutyrate_p	tateyamaria	-0.0362348	0.00475789	-0.0408318	0.0941272
x2_hydroxybutyrate_p	tatlockia	-0.25022	-0.25141	-0.244557	-0.210853
x2_hydroxybutyrate_p	tatumella	0.0322987	0.152621	-0.0150948	0.13645
x2_hydroxybutyrate_p	taylorella	-0.169773	-0.115664	-0.167183	-0.0951113
x2_hydroxybutyrate_p	tenacibaculum	0.0409833	0.103203	0.0497367	0.0820527
x2_hydroxybutyrate_p	tepidanaerobacter	0.279229	0.341265	0.179291	0.140262
x2_hydroxybutyrate_p	teredinibacter	0.114919	0.25989	0.0554379	0.221742
x2_hydroxybutyrate_p	terribacillus	0.00953768	0.109526	0.0457729	0.139126
x2_hydroxybutyrate_p	terriglobus	0.0455967	0.0478288	0.0370853	0.127002
x2_hydroxybutyrate_p	tessaracoccus	0.154207	-0.137065	0.125373	0.0171581
x2_hydroxybutyrate_p	tetragenococcus	0.0830518	0.24427	0.0514199	0.133261
x2_hydroxybutyrate_p	thalassococcus	-0.270028	-0.136391	-0.18901	-0.0701921
x2_hydroxybutyrate_p	thalassolituus	-0.398058	-0.298081	-0.42059	-0.285109
x2_hydroxybutyrate_p	thalassospira	0.122386	0.0464278	0.103383	0.124409
x2_hydroxybutyrate_p	thalassotalea	0.00643604	0.113108	-0.0602704	0.0444446
x2_hydroxybutyrate_p	thauera	0.136017	0.0323824	0.0750937	0.0935846
x2_hydroxybutyrate_p	thermacetogenium	0.260994	0.225458	0.323886	0.254409
x2_hydroxybutyrate_p	thermaerobacter	0.18671	0.00719837	0.182657	0.117187
x2_hydroxybutyrate_p	thermanaeromonas	-0.0152412	0.119405	-0.114242	0.0324709
x2_hydroxybutyrate_p	thermanaerovibrio	-0.0790052	-0.133658	-0.14492	0.0279709
x2_hydroxybutyrate_p	thermincola	-0.0444044	0.0204334	-0.0898083	-0.00168483
x2_hydroxybutyrate_p	thermoanaerobacter	-0.0843071	0.242336	-0.125102	0.0183531
x2_hydroxybutyrate_p	thermoanaerobacterium	0.0652255	-0.0134651	0.0706413	0.0431666
x2_hydroxybutyrate_p	thermobacillus	0.296683	-0.0241113	0.188847	0.131672
x2_hydroxybutyrate_p	thermobaculum	0.161337	0.0676293	0.210784	0.295057
x2_hydroxybutyrate_p	thermobifida	-0.0180801	-0.0367046	-0.0383342	0.139894
x2_hydroxybutyrate_p	thermobispora	0.208736	0.263725	0.22501	0.321514
x2_hydroxybutyrate_p	thermococcus	0.155035	0.00441304	0.188087	0.136959
x2_hydroxybutyrate_p	thermocrinis	-0.0308018	0.0406899	0.0246511	0.212319
x2_hydroxybutyrate_p	thermodesulfatator	-0.0962859	0.0510887	-0.0353478	0.103761
x2_hydroxybutyrate_p	thermodesulfobacterium	-0.269601	-0.151609	-0.202693	-0.0807833
x2_hydroxybutyrate_p	thermodesulfobium	0.00321678	0.109122	-0.0544606	0.0614232
x2_hydroxybutyrate_p	thermodesulfovibrio	-0.0821335	0.173793	-0.0906228	0.0808174
x2_hydroxybutyrate_p	thermofilum	-0.229345	-0.0855611	-0.165282	-0.0171468
x2_hydroxybutyrate_p	thermogladius	-0.127849	-0.0310523	-0.129554	0.0288827
x2_hydroxybutyrate_p	thermogutta	0.0721754	0.181126	0.123853	0.119405
x2_hydroxybutyrate_p	thermomicrobium	-0.133093	0.0868941	-0.0585872	0.0630111
x2_hydroxybutyrate_p	thermomonospora	0.00144342	0.0744028	-0.0858989	0.0499281
x2_hydroxybutyrate_p	thermoplasma	0.0639968	0.154878	0.0273117	0.151893
x2_hydroxybutyrate_p	thermoproteus	-0.137729	0.12299	-0.0858989	0.175393
x2_hydroxybutyrate_p	thermosediminibacter	-0.174269	0.0213019	-0.126731	0.0285342
x2_hydroxybutyrate_p	thermosipho	-0.0923539	0.027066	-0.0670033	-0.00390943
x2_hydroxybutyrate_p	thermosulfidibacter	-0.0297536	0.126516	0.00895911	0.140906
x2_hydroxybutyrate_p	thermosynechococcus	-0.205148	-0.0459844	-0.264647	0.00730869
x2_hydroxybutyrate_p	thermotoga	0.252301	0.163755	0.182712	0.147163
x2_hydroxybutyrate_p	thermovibrio	0.072479	0.269364	0.138079	0.202263
x2_hydroxybutyrate_p	thermovirga	-0.0813952	0.178933	-0.0870935	0.0849318
x2_hydroxybutyrate_p	thermus	0.191307	0.131215	0.226367	0.174029
x2_hydroxybutyrate_p	thioalkalivibrio	0.0916482	0.115752	0.116686	0.130586
x2_hydroxybutyrate_p	thiobacillus	-0.0031209	0.139269	-0.0404518	0.0833379
x2_hydroxybutyrate_p	thioclava	-0.0872571	0.0202734	-0.0493023	0.0435258
x2_hydroxybutyrate_p	thiocystis	-0.00744882	-0.0170584	0.0438725	0.167866
x2_hydroxybutyrate_p	thiodictyon	0.183632	0.06652	0.173753	0.140972
x2_hydroxybutyrate_p	thioflavicoccus	0.234128	0.0564168	0.19634	0.143307
x2_hydroxybutyrate_p	thiohalobacter	0.0296139	0.101555	0.033556	0.147792
x2_hydroxybutyrate_p	thiolapillus	-0.0506165	0.0415773	-0.0317641	0.0407454
x2_hydroxybutyrate_p	thiomicrospira	0.0291959	0.017875	-0.0369224	0.0769315
x2_hydroxybutyrate_p	thiomonas	0.1794	0.177182	0.173264	0.18822
x2_hydroxybutyrate_p	thioploca	-0.140042	-0.0309614	-0.121301	0.0924164
x2_hydroxybutyrate_p	tistrella	-0.161743	-0.0952316	-0.0603247	0.0306939
x2_hydroxybutyrate_p	tolumonas	-0.273046	-0.128629	-0.310746	-0.0851307
x2_hydroxybutyrate_p	treponema	0.161072	0.0415797	0.162241	0.148015
x2_hydroxybutyrate_p	trichodesmium	-0.0923388	0.00835082	-0.0591845	0.103888
x2_hydroxybutyrate_p	trichormus	-0.441247	-0.283595	-0.415106	-0.158153
x2_hydroxybutyrate_p	tropheryma	-0.307647	-0.188189	-0.276864	-0.305648
x2_hydroxybutyrate_p	truepera	-0.129293	-0.135173	-0.146441	0.0138367
x2_hydroxybutyrate_p	trueperella	-0.0427642	-0.075586	-0.0781886	0.0157463
x2_hydroxybutyrate_p	tsukamurella	-0.0231776	0.0086693	-0.0627681	0.0685988
x2_hydroxybutyrate_p	tumebacillus	0.124331	0.112393	0.114568	0.166042
x2_hydroxybutyrate_p	turicibacter	0.186168	-0.0223488	0.172775	0.151219
x2_hydroxybutyrate_p	turneriella	-0.0805956	0.0843209	-0.161264	-0.000606564
x2_hydroxybutyrate_p	ureaplasma	-0.0242133	0.118395	-0.079166	-0.000488812
x2_hydroxybutyrate_p	vagococcus	-0.103916	0.05871	-0.106858	-0.00944779
x2_hydroxybutyrate_p	variibacter	-0.0433777	0.0198629	-0.179725	0.032086
x2_hydroxybutyrate_p	variovorax	-0.101084	-0.157466	-0.0796004	-0.0093392
x2_hydroxybutyrate_p	veillonella	-0.0630626	-0.225016	0.0920888	0.0157463
x2_hydroxybutyrate_p	verminephrobacter	0.082807	0.218383	0.0169952	0.151192
x2_hydroxybutyrate_p	verrucomicrobium	0.156483	0.220719	0.102405	0.184889
x2_hydroxybutyrate_p	verrucosispora	-0.156057	-0.157698	-0.147364	0.0572075
x2_hydroxybutyrate_p	vibrio	-0.00800364	-0.128266	-0.110767	0.0693381
x2_hydroxybutyrate_p	virgibacillus	-0.0700557	0.119234	-0.140034	-0.0221534
x2_hydroxybutyrate_p	vitreoscilla	0.0758452	0.109346	0.0244882	0.110888
x2_hydroxybutyrate_p	vogesella	-0.0519126	0.0455581	-0.0657002	0.100994
x2_hydroxybutyrate_p	vulcanisaeta	0.039751	0.224259	0.115057	0.298852
x2_hydroxybutyrate_p	vulgatibacter	-0.025431	0.0576834	-0.0775914	0.0232926
x2_hydroxybutyrate_p	waddlia	-0.129536	-0.115648	-0.140034	0.0192174
x2_hydroxybutyrate_p	weeksella	-0.0188178	0.121613	-0.00532117	0.0965401
x2_hydroxybutyrate_p	weissella	0.0650693	0.209191	0.0596731	0.0976298
x2_hydroxybutyrate_p	wenyingzhuangia	-0.0791881	0.0347169	-0.0787859	0.0669389
x2_hydroxybutyrate_p	wenzhouxiangella	-0.0880419	-0.0795218	-0.0342075	0.025008
x2_hydroxybutyrate_p	wigglesworthia	-0.148592	-0.00908957	-0.18863	-0.0529467
x2_hydroxybutyrate_p	winogradskyella	0.0442406	-0.0418431	0.0739534	0.111558
x2_hydroxybutyrate_p	woeseia	0.0637851	-0.051055	0.149807	0.178788
x2_hydroxybutyrate_p	wolbachia	-0.124628	-0.0795902	-0.150513	-0.0575239
x2_hydroxybutyrate_p	wolinella	0.0873716	0.132066	0.123962	0.143183
x2_hydroxybutyrate_p	xanthobacter	0.10703	0.0271167	0.0300266	0.108163
x2_hydroxybutyrate_p	xanthomonas	0.223528	0.0898609	0.201987	0.163925
x2_hydroxybutyrate_p	xenorhabdus	0.0562435	0.145071	0.0830754	0.172124
x2_hydroxybutyrate_p	xylanimonas	-0.134703	-0.00832717	-0.117174	0.0940962
x2_hydroxybutyrate_p	xylella	-0.0943557	-0.0563149	-0.126894	0.0968162
x2_hydroxybutyrate_p	yangia	-0.016343	-0.062623	-0.0144432	0.0777639
x2_hydroxybutyrate_p	yersinia	-0.0508354	-0.0361463	0.0781343	-0.0225335
x2_hydroxybutyrate_p	yoonia	0.12058	0.131614	0.139002	0.167183
x2_hydroxybutyrate_p	zea	-0.20298	-0.151138	-0.15111	-0.0604296
x2_hydroxybutyrate_p	zhihengliuella	-0.139116	0.105628	-0.101374	0.055998
x2_hydroxybutyrate_p	zhongshania	-0.150855	-0.0932245	-0.253027	-0.0519684
x2_hydroxybutyrate_p	zobellella	0.098902	0.081581	0.0425694	0.140852
x2_hydroxybutyrate_p	zobellia	0.0489015	0.0857431	0.0894283	0.0858136
x2_hydroxybutyrate_p	zunongwangia	0.0693276	0.0216838	0.0824239	0.0507369
x2_hydroxybutyrate_p	zymomonas	0.205387	0.132384	0.237824	0.201689
x3_hydroxybutyrate_p	acaryochloris	-0.0399205	0.124614	-0.0904302	0.0463342
x3_hydroxybutyrate_p	acetoanaerobium	-0.0617572	0.244773	-0.0912449	0.0590919
x3_hydroxybutyrate_p	acetobacter	0.0703686	0.418371	0.0118944	0.116446
x3_hydroxybutyrate_p	acetobacterium	-0.0620542	0.419976	-0.0478492	0.0738106
x3_hydroxybutyrate_p	acetohalobium	0.0687158	0.164435	0.019118	0.131599
x3_hydroxybutyrate_p	acetomicrobium	-0.0440554	0.332238	-0.0897784	0.022394
x3_hydroxybutyrate_p	acholeplasma	0.00135336	0.153397	0.0257441	0.111126
x3_hydroxybutyrate_p	achromobacter	-0.010537	0.307672	-0.0311753	0.0414404
x3_hydroxybutyrate_p	acidaminococcus	-0.105523	-0.0880586	-0.130024	0.0632197
x3_hydroxybutyrate_p	acidianus	-0.152865	-0.0832065	-0.115034	0.0922326
x3_hydroxybutyrate_p	acidiferrobacter	0.0512417	0.0840701	0.107267	0.201566
x3_hydroxybutyrate_p	acidihalobacter	-0.0873936	-0.0502576	-0.0325874	0.0338946
x3_hydroxybutyrate_p	acidilobus	0.00491742	0.0209464	-0.106452	0.254573
x3_hydroxybutyrate_p	acidimicrobium	0.121319	0.805652	-0.0630024	0.0861489
x3_hydroxybutyrate_p	acidiphilium	-0.152653	0.00684162	-0.166196	-0.0219924
x3_hydroxybutyrate_p	acidipropionibacterium	0.214493	0.428273	0.131816	0.155783
x3_hydroxybutyrate_p	acidithiobacillus	0.0196413	0.153609	-0.0253096	0.153667
x3_hydroxybutyrate_p	acidobacterium	-0.0805824	-0.0387133	-0.0144471	0.0742854
x3_hydroxybutyrate_p	acidothermus	-0.215618	-0.0540193	-0.202531	0.0107696
x3_hydroxybutyrate_p	acidovorax	0.0350157	0.21383	0.130187	0.0980882
x3_hydroxybutyrate_p	aciduliprofundum	-0.29852	-0.0685327	-0.305833	-0.0548848
x3_hydroxybutyrate_p	acinetobacter	0.236531	0.208395	0.253313	0.373669
x3_hydroxybutyrate_p	actinoalloteichus	-0.000562646	0.0444396	-0.00472518	0.0823466
x3_hydroxybutyrate_p	actinobacillus	-0.185194	-0.0140674	-0.158864	0.00353031
x3_hydroxybutyrate_p	actinomyces	-0.111257	-0.00518946	-0.0955355	0.0825549
x3_hydroxybutyrate_p	actinoplanes	0.108899	0.148292	0.141158	0.203128
x3_hydroxybutyrate_p	actinopolymorpha	0.177857	-0.0246823	0.212633	0.248624
x3_hydroxybutyrate_p	actinopolyspora	0.0226861	0.000656568	0.0630567	0.14617
x3_hydroxybutyrate_p	actinosynnema	-0.271093	-0.0761913	-0.183739	-0.0660593
x3_hydroxybutyrate_p	actinotignum	-0.0239588	0.14864	-0.00716924	0.0878327
x3_hydroxybutyrate_p	acutalibacter	-0.199799	-0.0456841	-0.230882	0.00526802
x3_hydroxybutyrate_p	adlercreutzia	0.28742	0.12765	0.250543	0.276667
x3_hydroxybutyrate_p	advenella	0.0666193	0.302857	0.101673	0.11352
x3_hydroxybutyrate_p	aequorivita	0.130162	0.186357	0.089887	0.176481
x3_hydroxybutyrate_p	aeribacillus	0.110859	0.181649	-0.0498588	0.110203
x3_hydroxybutyrate_p	aerococcus	0.0491063	0.43453	-0.0211818	0.203834
x3_hydroxybutyrate_p	aeromicrobium	0.132955	0.186018	0.17456	0.170057
x3_hydroxybutyrate_p	aeromonas	-0.0545829	0.278858	-0.0429068	0.0870628
x3_hydroxybutyrate_p	afipia	-0.130828	0.0775346	-0.160004	-0.00179401
x3_hydroxybutyrate_p	agarilytica	-0.0352763	-0.0118872	-0.015642	0.0225368
x3_hydroxybutyrate_p	agarivorans	0.0930777	0.16122	0.0772866	0.144058
x3_hydroxybutyrate_p	aggregatibacter	-0.0752323	-0.082469	-0.0187921	0.121551
x3_hydroxybutyrate_p	agrobacterium	0.0215426	0.249457	-0.00803824	0.109222
x3_hydroxybutyrate_p	agrococcus	-0.160315	0.0162827	-0.117912	0.0131092
x3_hydroxybutyrate_p	agromyces	-0.0251319	0.0442092	0.0290571	0.0905362
x3_hydroxybutyrate_p	ahniella	-0.01622	0.0432326	-0.0110254	0.202804
x3_hydroxybutyrate_p	akkermansia	0.0689916	-0.0587929	0.0451336	0.125244
x3_hydroxybutyrate_p	alcaligenes	0.105255	0.438179	0.224908	0.262383
x3_hydroxybutyrate_p	alcanivorax	0.0638771	0.265924	0.0675103	0.150826
x3_hydroxybutyrate_p	algibacter	0.0625839	0.0843456	0.0445362	0.194319
x3_hydroxybutyrate_p	algoriphagus	0.277842	0.319332	0.36373	0.34139
x3_hydroxybutyrate_p	alicycliphilus	-0.172282	0.0607606	-0.235173	-0.0486837
x3_hydroxybutyrate_p	alicyclobacillus	0.117245	0.107593	0.093363	0.191069
x3_hydroxybutyrate_p	aliivibrio	0.243494	0.572623	0.232946	0.204432
x3_hydroxybutyrate_p	alistipes	-0.0145651	-0.0831478	0.149631	0.16033
x3_hydroxybutyrate_p	alkalilimnicola	-0.107025	0.100431	-0.131436	-0.0459648
x3_hydroxybutyrate_p	alkaliphilus	-0.105662	0.105905	-0.185803	0.0353031
x3_hydroxybutyrate_p	alkalitalea	0.0412685	0.0637685	0.0786987	0.112276
x3_hydroxybutyrate_p	alloactinosynnema	0.12539	0.348378	0.184554	0.255414
x3_hydroxybutyrate_p	allochromatium	-0.061046	-0.0160788	-0.063274	0.0351192
x3_hydroxybutyrate_p	allofrancisella	0.0106314	0.114131	-0.0740278	0.178946
x3_hydroxybutyrate_p	allokutzneria	-0.119722	0.000499557	-0.0857593	0.0217234
x3_hydroxybutyrate_p	altererythrobacter	0.119486	0.589856	0.111884	0.119192
x3_hydroxybutyrate_p	alteromonas	0.133304	0.407069	0.123561	0.158375
x3_hydroxybutyrate_p	aminobacter	0.0594908	0.421108	0.0731588	0.113897
x3_hydroxybutyrate_p	aminobacterium	-0.110745	0.155415	-0.142244	0.0669494
x3_hydroxybutyrate_p	aminomonas	0.0569814	0.268513	-0.0547469	0.0765741
x3_hydroxybutyrate_p	ammonifex	0.0335371	0.0875232	0.000380187	0.147498
x3_hydroxybutyrate_p	amphibacillus	-0.0572276	0.121836	-0.0119487	0.121993
x3_hydroxybutyrate_p	amycolatopsis	0.0930289	0.065557	0.146644	0.169514
x3_hydroxybutyrate_p	anabaena	-0.0368664	0.0462128	-0.0114599	0.0253528
x3_hydroxybutyrate_p	anabaenopsis	-0.079887	0.152706	-0.186726	0.0145926
x3_hydroxybutyrate_p	anaerococcus	0.0996922	-0.0121522	0.110634	0.282099
x3_hydroxybutyrate_p	anaerolinea	0.166162	0.302083	0.12872	0.137468
x3_hydroxybutyrate_p	anaeromyxobacter	-0.0422983	0.103106	-0.0797849	0.0392961
x3_hydroxybutyrate_p	anaerostipes	0.0824182	0.0113361	0.110526	0.208451
x3_hydroxybutyrate_p	anaerotignum	-0.0288278	0.0111304	-0.00146644	0.118401
x3_hydroxybutyrate_p	anaplasma	-0.177681	0.0911901	-0.269878	-0.0633231
x3_hydroxybutyrate_p	anderseniella	0.159632	0.236139	0.120737	0.18057
x3_hydroxybutyrate_p	aneurinibacillus	0.211772	0.318961	0.163643	0.28237
x3_hydroxybutyrate_p	anoxybacillus	-0.0240988	0.224472	-0.0449707	0.0229742
x3_hydroxybutyrate_p	antarctobacter	0.0115951	0.411274	-0.0370954	0.0175524
x3_hydroxybutyrate_p	aquabacterium	-0.0738002	0.124849	-0.111286	-0.0169464
x3_hydroxybutyrate_p	aquaspirillum	-0.0204441	0.126992	0.025038	0.0678187
x3_hydroxybutyrate_p	aquifex	0.144666	0.608455	-0.0721812	0.0838731
x3_hydroxybutyrate_p	aquiflexum	0.112772	0.336267	0.101238	0.0921471
x3_hydroxybutyrate_p	arachidicoccus	0.168827	0.580265	0.240007	0.211173
x3_hydroxybutyrate_p	arcanobacterium	0.0595551	0.526843	0.0484467	0.117487
x3_hydroxybutyrate_p	archaeoglobus	-0.232253	-0.0807512	-0.193189	-0.115475
x3_hydroxybutyrate_p	archangium	0.177516	0.130473	0.232837	0.205994
x3_hydroxybutyrate_p	arcobacter	0.022912	0.267071	-0.0282425	0.0847297
x3_hydroxybutyrate_p	arcticibacterium	0.269472	0.452013	0.266239	0.371301
x3_hydroxybutyrate_p	arenibacter	-0.0536534	0.114184	-0.0140669	0.0238115
x3_hydroxybutyrate_p	aromatoleum	0.143324	0.211622	0.0792961	0.140691
x3_hydroxybutyrate_p	arsenicicoccus	0.167706	0.323611	0.14257	0.167612
x3_hydroxybutyrate_p	arsenophonus	0.0221398	0.684247	-0.0473061	-0.000562178
x3_hydroxybutyrate_p	arthrobacter	0.0123679	0.064619	0.155388	0.171899
x3_hydroxybutyrate_p	arthrospira	-0.183545	-0.00138019	-0.143113	-0.0498315
x3_hydroxybutyrate_p	asaia	-0.111543	0.216369	-0.0779926	0.0498536
x3_hydroxybutyrate_p	asticcacaulis	0.0410159	0.526567	0.055453	0.0737449
x3_hydroxybutyrate_p	atopobium	-0.035172	0.0784277	0.0205844	0.0483924
x3_hydroxybutyrate_p	aurantimicrobium	-0.0314263	0.323685	0.00678905	0.1052
x3_hydroxybutyrate_p	auraticoccus	-0.226784	-0.0995787	-0.135618	0.0129658
x3_hydroxybutyrate_p	aureimonas	0.024768	0.137971	0.00271562	0.102154
x3_hydroxybutyrate_p	aureitalea	-0.00484434	0.0147292	0.0488812	0.220827
x3_hydroxybutyrate_p	auricoccus	-0.131215	0.116745	-0.157234	0.0456891
x3_hydroxybutyrate_p	azoarcus	0.0814284	0.309732	0.0230828	0.144417
x3_hydroxybutyrate_p	azorhizobium	-0.210429	-0.0101908	-0.280904	-0.0563373
x3_hydroxybutyrate_p	azospira	0.0319078	0.0531805	0.0978167	0.0858974
x3_hydroxybutyrate_p	azospirillum	0.0686465	0.311612	-0.000814686	0.0836954
x3_hydroxybutyrate_p	azotobacter	-0.13033	0.0957448	-0.225885	-0.0833786
x3_hydroxybutyrate_p	bacillus	0.0613801	0.430198	0.0162394	0.20579
x3_hydroxybutyrate_p	bacterioplanes	0.132456	0.496504	0.19433	0.246425
x3_hydroxybutyrate_p	bacteriovorax	0.152793	0.189431	0.0840213	0.244798
x3_hydroxybutyrate_p	bacteroides	0.0147657	0.0975896	0.0154247	0.117315
x3_hydroxybutyrate_p	barnesiella	-0.0221159	0.0553313	0.0330763	0.0696828
x3_hydroxybutyrate_p	bartonella	0.221406	0.512401	0.208614	0.269234
x3_hydroxybutyrate_p	basfia	-0.194033	0.0258506	-0.126928	-0.0651702
x3_hydroxybutyrate_p	basilea	-0.060712	-0.0389973	0.0185205	0.092091
x3_hydroxybutyrate_p	bdellovibrio	0.0914117	0.417354	0.207528	0.202917
x3_hydroxybutyrate_p	beggiatoa	-0.309838	-0.098925	-0.249783	-0.170397
x3_hydroxybutyrate_p	beijerinckia	-0.0027548	0.0946575	-0.00374756	0.0858508
x3_hydroxybutyrate_p	belliella	0.0411562	0.30528	-0.00809255	0.130625
x3_hydroxybutyrate_p	bernardetia	0.194134	0.460491	0.28791	0.244158
x3_hydroxybutyrate_p	beutenbergia	0.0459588	0.00153304	0.062242	0.161722
x3_hydroxybutyrate_p	bibersteinia	-0.0612023	0.120752	-0.059798	0.0160044
x3_hydroxybutyrate_p	bifidobacterium	0.0868809	0.0618791	0.0643602	0.173202
x3_hydroxybutyrate_p	blastochloris	-0.133959	0.176164	-0.183141	0.0251162
x3_hydroxybutyrate_p	blastococcus	0.0134463	0.514261	0.0148273	0.0301449
x3_hydroxybutyrate_p	blastomonas	0.0890587	0.0543699	0.18287	0.19078
x3_hydroxybutyrate_p	blattabacterium	0.0682079	0.465803	0.063274	0.125638
x3_hydroxybutyrate_p	blautia	-0.135124	-0.0162514	-0.1927	0.0273735
x3_hydroxybutyrate_p	bordetella	0.0314524	0.287634	0.086574	0.126928
x3_hydroxybutyrate_p	borrelia	0.146381	0.199653	0.159733	0.191175
x3_hydroxybutyrate_p	borreliella	-0.0774017	0.17838	-0.00391049	0.113115
x3_hydroxybutyrate_p	bosea	-0.0155517	0.0848956	-0.0169998	0.0536607
x3_hydroxybutyrate_p	brachybacterium	-0.0451788	-0.00209071	-0.0634369	0.0865197
x3_hydroxybutyrate_p	brachyspira	0.108226	0.325077	0.026776	0.229775
x3_hydroxybutyrate_p	bradymonas	-0.130059	-0.108852	0.0320443	0.081041
x3_hydroxybutyrate_p	bradyrhizobium	-0.050443	0.191963	-0.0392136	0.0392136
x3_hydroxybutyrate_p	brenneria	-0.141706	0.0784082	-0.128395	-0.0499416
x3_hydroxybutyrate_p	brevefilum	-0.0370736	0.138289	-0.0400826	0.0102362
x3_hydroxybutyrate_p	brevibacillus	-0.0443327	0.262902	-0.0487182	0.109928
x3_hydroxybutyrate_p	brevibacterium	0.115689	-0.0262775	0.14257	0.188899
x3_hydroxybutyrate_p	brevirhabdus	-0.0328345	0.393925	-0.0849446	0.0477871
x3_hydroxybutyrate_p	brevundimonas	-0.103028	0.0489711	-0.139094	-0.0183576
x3_hydroxybutyrate_p	brochothrix	0.0972949	0.388507	0.017217	0.101075
x3_hydroxybutyrate_p	brucella	-0.0273312	0.116989	-0.042418	0.0864748
x3_hydroxybutyrate_p	buchnera	-0.00696917	0.169429	-0.0132522	0.0902425
x3_hydroxybutyrate_p	burkholderia	0.0231467	0.25422	0.0279709	0.161145
x3_hydroxybutyrate_p	butyrivibrio	0.0693099	0.388179	0.0340539	0.136813
x3_hydroxybutyrate_p	caldanaerobacter	0.184639	0.556349	0.0727243	0.18048
x3_hydroxybutyrate_p	caldicellulosiruptor	0.0452582	0.199962	0.0134152	0.120302
x3_hydroxybutyrate_p	caldilinea	-0.147303	-0.00637967	-0.0585488	0.0660795
x3_hydroxybutyrate_p	caldimicrobium	-0.083272	0.468098	-0.1039	0.0541962
x3_hydroxybutyrate_p	caldisericum	-0.0486479	0.345779	-0.0760374	0.129936
x3_hydroxybutyrate_p	caldisphaera	-0.126311	0.0432801	-0.132359	0.270885
x3_hydroxybutyrate_p	calditerrivibrio	-0.10529	0.00836132	-0.123778	0.0510049
x3_hydroxybutyrate_p	caldithrix	-0.00246045	0.139072	0.0282425	0.153393
x3_hydroxybutyrate_p	calothrix	0.13804	0.215474	0.0373669	0.170215
x3_hydroxybutyrate_p	campylobacter	-0.0346979	0.117784	-0.0756029	-0.0487182
x3_hydroxybutyrate_p	candidatus_accumulibacter	0.17046	0.246545	0.136324	0.265829
x3_hydroxybutyrate_p	candidatus_amoebophilus	0.0622394	0.393506	-0.0644145	0.0612692
x3_hydroxybutyrate_p	candidatus_aquiluna	-0.0858818	-0.0446671	-0.0216163	0.194858
x3_hydroxybutyrate_p	candidatus_arthromitus	0.0259298	0.289455	-0.0258527	0.081145
x3_hydroxybutyrate_p	candidatus_atelocyanobacterium	-0.0509392	0.215707	-0.140669	0.0970174
x3_hydroxybutyrate_p	candidatus_azobacteroides	0.117278	0.140707	0.235933	0.223303
x3_hydroxybutyrate_p	candidatus_babela	0.0253823	-0.00342205	0.0534434	0.253429
x3_hydroxybutyrate_p	candidatus_blochmannia	-0.220352	0.277468	-0.213991	-0.0882289
x3_hydroxybutyrate_p	candidatus_cardinium	0.0420462	0.0233284	0.0676733	0.193522
x3_hydroxybutyrate_p	candidatus_carsonella	-0.274898	-0.0742927	-0.341028	-0.246007
x3_hydroxybutyrate_p	candidatus_cloacimonas	0.141596	0.302914	0.0799479	0.144303
x3_hydroxybutyrate_p	candidatus_desulfofervidus	-0.270267	-0.0247223	-0.224419	-0.0483177
x3_hydroxybutyrate_p	candidatus_desulforudis	0.149774	0.338328	0.0841299	0.267795
x3_hydroxybutyrate_p	candidatus_doolittlea	-0.267096	-0.0615463	-0.312351	-0.241237
x3_hydroxybutyrate_p	candidatus_endolissoclinum	-0.420691	-0.124137	-0.435586	-0.284355
x3_hydroxybutyrate_p	candidatus_evansia	-0.196837	-0.107527	-0.152346	0.0409157
x3_hydroxybutyrate_p	candidatus_fokinia	-0.042294	0.00107154	-0.00706061	0.169172
x3_hydroxybutyrate_p	candidatus_fonsibacter	-0.0826191	0.00082248	-0.100424	0.0824569
x3_hydroxybutyrate_p	candidatus_gullanella	0.104313	0.165618	0.0610472	0.200898
x3_hydroxybutyrate_p	candidatus_hamiltonella	-0.00826965	0.387849	-0.0508364	0.0618663
x3_hydroxybutyrate_p	candidatus_hoaglandella	-0.280038	-0.0776041	-0.213937	-0.133454
x3_hydroxybutyrate_p	candidatus_ishikawaella	-0.0973324	0.259322	-0.183033	-0.0594019
x3_hydroxybutyrate_p	candidatus_izimaplasma	-0.0993974	0.20138	-0.143928	0.0116611
x3_hydroxybutyrate_p	candidatus_kinetoplastibacterium	-0.0594308	0.00186385	-0.0269933	0.116569
x3_hydroxybutyrate_p	candidatus_korarchaeum	-0.170226	0.0124043	-0.200304	0.158041
x3_hydroxybutyrate_p	candidatus_koribacter	0.054658	0.235742	0.104497	0.106807
x3_hydroxybutyrate_p	candidatus_kuenenia	-0.137531	0.143042	-0.225451	-0.016674
x3_hydroxybutyrate_p	candidatus_methanomethylophilus	0.119248	0.00569976	0.0672388	0.110947
x3_hydroxybutyrate_p	candidatus_methanoplasma	-0.102924	-0.000919134	-0.112155	0.0572569
x3_hydroxybutyrate_p	candidatus_methylopumilus	-0.248577	-0.0723585	-0.208397	-0.0281878
x3_hydroxybutyrate_p	candidatus_midichloria	-0.0312766	0.0944582	-0.0387248	0.281067
x3_hydroxybutyrate_p	candidatus_mikella	-0.144377	0.142961	-0.243374	-0.238497
x3_hydroxybutyrate_p	candidatus_moranella	-0.268318	-0.111672	-0.275581	-0.165716
x3_hydroxybutyrate_p	candidatus_nanopelagicus	0.142372	0.635299	0.0545297	0.183987
x3_hydroxybutyrate_p	candidatus_nasuia	-0.182657	0.392737	-0.274278	-0.0190519
x3_hydroxybutyrate_p	candidatus_nitrosocaldus	-0.00679717	0.54525	-0.095264	0.253945
x3_hydroxybutyrate_p	candidatus_nitrosoglobus	-0.0934318	0.0491874	-0.148219	0.0925096
x3_hydroxybutyrate_p	candidatus_nitrosomarinus	-0.192503	-0.0422672	-0.209972	0.0263401
x3_hydroxybutyrate_p	candidatus_nitrosopelagicus	-0.208024	0.0476173	-0.280143	-0.0343288
x3_hydroxybutyrate_p	candidatus_nitrosotenuis	-0.130559	-0.0255351	-0.163969	0.00528526
x3_hydroxybutyrate_p	candidatus_nucleicultrix	-0.0398354	0.414574	-0.15881	0.0197169
x3_hydroxybutyrate_p	candidatus_paracaedibacter	-0.184912	0.333232	-0.26385	-0.105811
x3_hydroxybutyrate_p	candidatus_pelagibacter	0.0880397	0.146967	0.027808	0.144986
x3_hydroxybutyrate_p	candidatus_phaeomarinobacter	-0.26549	0.243466	-0.35705	-0.179754
x3_hydroxybutyrate_p	candidatus_phycorickettsia	0.283513	0.568832	0.293613	0.331525
x3_hydroxybutyrate_p	candidatus_phytoplasma	0.0880846	0.270107	0.0930372	0.215896
x3_hydroxybutyrate_p	candidatus_planktophila	0.158574	0.32011	0.0678362	0.202048
x3_hydroxybutyrate_p	candidatus_portiera	-0.235657	-0.0660184	-0.295731	-0.182891
x3_hydroxybutyrate_p	candidatus_profftella	0.000162259	0.0511055	0.0616989	0.276308
x3_hydroxybutyrate_p	candidatus_promineofilum	0.147982	0.22174	0.149142	0.156994
x3_hydroxybutyrate_p	candidatus_protochlamydia	0.0851371	0.177313	0.0109168	0.290496
x3_hydroxybutyrate_p	candidatus_puniceispirillum	-0.0330619	0.119037	0.0661525	0.112415
x3_hydroxybutyrate_p	candidatus_riesia	-0.20046	-0.0778053	-0.150608	-0.0759816
x3_hydroxybutyrate_p	candidatus_ruthia	-0.0962892	0.183093	-0.112264	0.110086
x3_hydroxybutyrate_p	candidatus_solibacter	0.0947413	-0.0186849	0.128883	0.16033
x3_hydroxybutyrate_p	candidatus_sulcia	0.160485	0.772792	0.0656637	0.212576
x3_hydroxybutyrate_p	candidatus_symbiobacter	0.0437013	0.327918	-0.0192809	0.0286801
x3_hydroxybutyrate_p	candidatus_tachikawaea	0.0304507	0.177681	-0.0590376	-0.00235515
x3_hydroxybutyrate_p	candidatus_thioglobus	-0.0828439	0.670612	-0.113567	-0.0214321
x3_hydroxybutyrate_p	candidatus_tremblaya	-0.191972	-0.0627184	-0.185097	0.0821868
x3_hydroxybutyrate_p	candidatus_walczuchella	-0.132042	0.25373	-0.252444	-0.0282372
x3_hydroxybutyrate_p	candidatus_xiphinematobacter	-0.00753305	0.0431574	-0.0612644	0.103124
x3_hydroxybutyrate_p	capnocytophaga	0.221907	0.431567	0.312296	0.286607
x3_hydroxybutyrate_p	carboxydocella	0.0657692	0.387481	0.0424723	0.126222
x3_hydroxybutyrate_p	carboxydothermus	0.129334	0.222756	-0.00342168	0.153081
x3_hydroxybutyrate_p	carnobacterium	0.0170888	0.268946	-0.103791	0.0966218
x3_hydroxybutyrate_p	castellaniella	0.0690064	0.111407	0.116337	0.193839
x3_hydroxybutyrate_p	catenovulum	0.0242331	0.0914207	0.00298718	0.117645
x3_hydroxybutyrate_p	catenulispora	-0.115627	-0.0774478	-0.0368238	0.0467757
x3_hydroxybutyrate_p	caulobacter	-0.047803	0.0207595	-0.0603411	0.109765
x3_hydroxybutyrate_p	cedecea	-0.207069	-0.0614668	-0.19786	-0.102107
x3_hydroxybutyrate_p	celeribacter	0.0153989	0.419305	-0.0941234	0.100073
x3_hydroxybutyrate_p	cellulomonas	-0.162608	-0.0193354	-0.224962	-0.0813894
x3_hydroxybutyrate_p	cellulophaga	0.00520531	0.0905487	-0.00418206	0.0923608
x3_hydroxybutyrate_p	cellulosilyticum	0.066226	0.120373	-0.00293287	0.212796
x3_hydroxybutyrate_p	cellulosimicrobium	-6.19194e-05	0.0108647	-0.0187921	0.153829
x3_hydroxybutyrate_p	cellvibrio	0.196026	0.340869	0.229633	0.273525
x3_hydroxybutyrate_p	chamaesiphon	0.241557	0.661286	0.257169	0.265121
x3_hydroxybutyrate_p	chania	0.105765	0.451711	0.119868	0.230681
x3_hydroxybutyrate_p	chelativorans	-0.00801722	0.208557	0.0357919	0.0745425
x3_hydroxybutyrate_p	chelatococcus	-0.0900178	0.116507	-0.0687595	0.0619993
x3_hydroxybutyrate_p	chitinophaga	0.235574	0.121224	0.33098	0.347056
x3_hydroxybutyrate_p	chlamydia	-0.218465	0.0586326	-0.240604	-0.0866307
x3_hydroxybutyrate_p	chloracidobacterium	0.0748387	0.252584	0.0131979	0.158762
x3_hydroxybutyrate_p	chlorobaculum	0.117595	0.263218	0.174506	0.18678
x3_hydroxybutyrate_p	chlorobium	0.215225	0.492554	0.181241	0.232294
x3_hydroxybutyrate_p	chloroflexus	0.302353	0.42952	0.282479	0.318824
x3_hydroxybutyrate_p	chloroherpeton	-0.0212145	0.242276	0.030252	0.12184
x3_hydroxybutyrate_p	chondrocystis	0.144845	0.173531	0.146318	0.215168
x3_hydroxybutyrate_p	chondromyces	0.0333556	0.246909	0.0628938	0.110096
x3_hydroxybutyrate_p	christensenella	-0.0148611	0.121572	-0.0496959	0.0816316
x3_hydroxybutyrate_p	chromobacterium	0.131144	0.302335	0.143113	0.135405
x3_hydroxybutyrate_p	chromohalobacter	-0.00555666	-0.0269396	0.0775581	0.134442
x3_hydroxybutyrate_p	chroococcidiopsis	0.112502	0.640022	0.0242777	0.149017
x3_hydroxybutyrate_p	chryseobacterium	-0.00755407	-0.0446255	0.0336737	0.0986313
x3_hydroxybutyrate_p	chthonomonas	0.146759	0.262527	0.18602	0.207908
x3_hydroxybutyrate_p	citrobacter	-0.21411	-0.101209	-0.161742	-0.137736
x3_hydroxybutyrate_p	citromicrobium	-0.0123772	-0.0605816	0.0259613	0.0765255
x3_hydroxybutyrate_p	clavibacter	-0.0236766	-0.0285091	-0.0309581	0.128864
x3_hydroxybutyrate_p	cloacibacillus	0.165545	0.0952392	0.135129	0.20932
x3_hydroxybutyrate_p	clostridioides	-0.0807849	0.0906626	-0.126168	0.0929285
x3_hydroxybutyrate_p	clostridium	-0.00578087	0.210771	0.00776668	0.111612
x3_hydroxybutyrate_p	cnuibacter	0.145711	0.656649	0.119976	0.201709
x3_hydroxybutyrate_p	cobetia	-0.253059	-0.0757643	-0.138008	-0.0984008
x3_hydroxybutyrate_p	cohaesibacter	-0.0743195	-0.0078241	-0.0846187	0.0296828
x3_hydroxybutyrate_p	collimonas	0.0271166	0.139985	0.0979796	0.184336
x3_hydroxybutyrate_p	collinsella	0.0234685	0.222367	-0.0532262	0.0567565
x3_hydroxybutyrate_p	colwellia	0.0594918	0.158361	0.0116772	0.124324
x3_hydroxybutyrate_p	comamonas	-0.104824	0.304626	-0.185966	-0.0225397
x3_hydroxybutyrate_p	conexibacter	0.12132	0.496348	-0.013904	0.0844038
x3_hydroxybutyrate_p	confluentimicrobium	0.0544255	0.235094	0.0669672	0.0986943
x3_hydroxybutyrate_p	congregibacter	-0.0572227	0.0795436	0.0288942	0.0789393
x3_hydroxybutyrate_p	coprothermobacter	-0.0684352	0.0180931	-0.0690311	0.0373146
x3_hydroxybutyrate_p	coraliomargarita	0.0308749	0.0224076	0.104063	0.106147
x3_hydroxybutyrate_p	corallococcus	-0.191952	-0.0611482	-0.178742	0.0221076
x3_hydroxybutyrate_p	coriobacterium	-0.066079	0.432302	-0.130839	0.0496415
x3_hydroxybutyrate_p	corynebacterium	0.0225925	0.0966184	0.066587	0.152401
x3_hydroxybutyrate_p	coxiella	-0.0664922	0.09914	-0.105529	0.0510845
x3_hydroxybutyrate_p	crinalium	0.0413511	0.219048	-0.0401369	0.058686
x3_hydroxybutyrate_p	croceibacter	-0.0817101	-0.055018	0.0941234	0.190142
x3_hydroxybutyrate_p	croceicoccus	0.117278	0.154527	0.169726	0.20343
x3_hydroxybutyrate_p	cronobacter	-0.197531	-0.0562717	-0.25831	-0.161036
x3_hydroxybutyrate_p	cryobacterium	-0.00733345	0.271727	-0.0262329	-0.00450842
x3_hydroxybutyrate_p	cryptobacterium	-0.18556	0.0808651	-0.229742	-0.110096
x3_hydroxybutyrate_p	cuniculiplasma	0.187564	0.796929	0.0348686	0.338756
x3_hydroxybutyrate_p	cupriavidus	0.191286	0.287129	0.292146	0.297198
x3_hydroxybutyrate_p	curtobacterium	0.096595	0.00910318	0.197317	0.330616
x3_hydroxybutyrate_p	curvibacter	-0.168516	0.12523	-0.103085	-0.0401436
x3_hydroxybutyrate_p	cutibacterium	-0.0980354	-0.0344227	-0.115197	0.0427982
x3_hydroxybutyrate_p	cyanobacterium	-0.0402049	-0.0243166	0.0542581	0.104573
x3_hydroxybutyrate_p	cyanobium	0.0576419	0.153073	0.0349229	0.0660347
x3_hydroxybutyrate_p	cyanothece	0.151735	0.438592	0.0989029	0.164621
x3_hydroxybutyrate_p	cyclobacterium	0.0533528	0.182778	0.147404	0.169039
x3_hydroxybutyrate_p	cycloclasticus	-0.0540847	-0.0308046	-0.0471975	0.0809759
x3_hydroxybutyrate_p	cylindrospermum	0.0600627	0.222819	-0.115414	0.104876
x3_hydroxybutyrate_p	cystobacter	-0.0749054	0.0973916	-0.0476863	0.0441708
x3_hydroxybutyrate_p	cytophaga	0.388761	0.463519	0.42972	0.416422
x3_hydroxybutyrate_p	dactylococcopsis	-0.0870252	-0.0473128	-0.0668043	0.144377
x3_hydroxybutyrate_p	dechloromonas	0.0066008	0.0516943	0.0418206	0.106427
x3_hydroxybutyrate_p	deferribacter	0.0396365	0.441048	-0.0383446	0.13602
x3_hydroxybutyrate_p	defluviimonas	-0.0305731	0.0336869	-0.0406257	0.0466364
x3_hydroxybutyrate_p	defluviitoga	-0.00915886	0.0327403	0.0276993	0.129567
x3_hydroxybutyrate_p	dehalobacter	0.00656953	0.261734	-0.042418	0.0765805
x3_hydroxybutyrate_p	dehalobacterium	0.100628	0.164495	0.114219	0.18678
x3_hydroxybutyrate_p	dehalococcoides	0.0408524	0.135561	-0.0213991	0.095101
x3_hydroxybutyrate_p	dehalogenimonas	-0.135274	0.269603	-0.169781	0.023463
x3_hydroxybutyrate_p	deinococcus	0.0742224	0.0044899	0.203346	0.168586
x3_hydroxybutyrate_p	delftia	-0.0184606	0.0769083	-0.0216707	0.068488
x3_hydroxybutyrate_p	denitrobacterium	-0.0597909	0.381574	-0.0734304	0.0457323
x3_hydroxybutyrate_p	denitrovibrio	0.146491	0.373775	0.0436129	0.102224
x3_hydroxybutyrate_p	dermabacter	-0.155943	-0.0529324	-0.126222	0.107587
x3_hydroxybutyrate_p	dermacoccus	-0.130368	-0.033744	-0.127037	0.0821713
x3_hydroxybutyrate_p	dermatophilus	-0.204594	-0.0864547	-0.0385075	-0.0178285
x3_hydroxybutyrate_p	desulfallas	0.0815275	0.445844	0.176841	0.157999
x3_hydroxybutyrate_p	desulfarculus	0.144933	0.443	0.118564	0.131988
x3_hydroxybutyrate_p	desulfatibacillum	0.17906	0.506309	0.127145	0.16472
x3_hydroxybutyrate_p	desulfitobacterium	0.0534658	0.262172	-0.0165653	0.125027
x3_hydroxybutyrate_p	desulfobacca	-0.143619	0.0116268	-0.108516	-0.0419632
x3_hydroxybutyrate_p	desulfobacter	-0.181351	-0.0836961	-0.10944	-0.0510271
x3_hydroxybutyrate_p	desulfobacterium	0.109268	0.217723	0.0493157	0.102857
x3_hydroxybutyrate_p	desulfobacula	-0.025902	0.104388	-0.0153704	0.0930441
x3_hydroxybutyrate_p	desulfobulbus	0.133067	0.280346	0.10982	0.0977346
x3_hydroxybutyrate_p	desulfocapsa	0.00436859	0.136718	0.015479	0.123295
x3_hydroxybutyrate_p	desulfococcus	-0.0127214	0.301523	-0.0260156	-0.00339462
x3_hydroxybutyrate_p	desulfofarcimen	-0.0721147	0.0989471	-0.114545	0.0258527
x3_hydroxybutyrate_p	desulfohalobium	0.000407907	0.052667	0.0678362	0.132575
x3_hydroxybutyrate_p	desulfomicrobium	-0.0711537	0.0951736	-0.124864	-0.0750598
x3_hydroxybutyrate_p	desulfomonile	0.0657734	0.0923368	0.0254725	0.14999
x3_hydroxybutyrate_p	desulfosporosinus	0.0706184	0.243759	-0.00890724	0.155985
x3_hydroxybutyrate_p	desulfotalea	-0.0408726	-0.00165062	-0.0625136	0.0840197
x3_hydroxybutyrate_p	desulfotomaculum	0.292	0.109514	0.20579	0.281121
x3_hydroxybutyrate_p	desulfovibrio	-0.0745478	0.0125594	-0.112481	-0.0228655
x3_hydroxybutyrate_p	desulfurella	0.195634	0.234771	0.204269	0.289545
x3_hydroxybutyrate_p	desulfurispirillum	-0.136588	0.137123	-0.118238	-0.0631825
x3_hydroxybutyrate_p	desulfurivibrio	0.0962443	0.181331	0.094232	0.143657
x3_hydroxybutyrate_p	desulfurobacterium	-0.0229505	0.183017	-0.0175972	0.0269463
x3_hydroxybutyrate_p	desulfurococcus	-0.216618	-0.0550302	-0.247773	-0.0857987
x3_hydroxybutyrate_p	desulfuromonas	-0.161612	0.141745	-0.243374	-0.0897241
x3_hydroxybutyrate_p	devosia	0.249507	0.279066	0.222681	0.244732
x3_hydroxybutyrate_p	devriesea	-0.197065	-0.0977429	-0.140832	-0.0562242
x3_hydroxybutyrate_p	dialister	0.19145	0.070521	0.225722	0.252227
x3_hydroxybutyrate_p	diaphorobacter	-0.016599	0.0588309	0.0139583	0.223089
x3_hydroxybutyrate_p	dichelobacter	-0.0605481	0.133199	-0.0238975	0.102827
x3_hydroxybutyrate_p	dickeya	-0.08235	0.214084	-0.0873344	0.00293287
x3_hydroxybutyrate_p	dictyoglomus	0.159792	0.329466	0.0993917	0.175696
x3_hydroxybutyrate_p	dietzia	0.0912146	0.0915741	0.140506	0.238783
x3_hydroxybutyrate_p	dinoroseobacter	0.0441735	0.0254387	0.118292	0.132411
x3_hydroxybutyrate_p	dokdonella	-0.0284241	0.0172436	-0.0070063	0.071938
x3_hydroxybutyrate_p	dokdonia	0.122951	0.419304	0.132088	0.127723
x3_hydroxybutyrate_p	dolichospermum	-0.0680995	-0.037987	-0.0065718	0.153096
x3_hydroxybutyrate_p	draconibacterium	0.254261	0.218387	0.348849	0.368713
x3_hydroxybutyrate_p	dyadobacter	0.289458	0.231781	0.396644	0.406589
x3_hydroxybutyrate_p	dyella	-0.0432201	0.0368584	0.0369868	0.116784
x3_hydroxybutyrate_p	echinicola	0.227496	0.426511	0.286715	0.289136
x3_hydroxybutyrate_p	ectothiorhodospira	-0.131309	0.0705403	-0.184608	-0.0933159
x3_hydroxybutyrate_p	edwardsiella	-0.130226	0.114623	-0.194438	-0.0644145
x3_hydroxybutyrate_p	eggerthella	-0.0728672	-0.0537486	-0.100261	-0.0244949
x3_hydroxybutyrate_p	ehrlichia	0.106744	0.733213	-0.0555073	0.0721186
x3_hydroxybutyrate_p	eikenella	-0.0145599	0.0812432	-0.00396481	0.0390341
x3_hydroxybutyrate_p	elizabethkingia	0.154514	0.512495	0.222735	0.197567
x3_hydroxybutyrate_p	elusimicrobium	-0.19562	-0.0348592	-0.179122	-0.0100537
x3_hydroxybutyrate_p	endomicrobium	0.117123	0.158821	0.112101	0.186432
x3_hydroxybutyrate_p	endozoicomonas	0.0999759	0.111365	0.129535	0.17363
x3_hydroxybutyrate_p	ensifer	0.0999649	0.432547	0.103031	0.156763
x3_hydroxybutyrate_p	enterobacter	-0.338998	-0.0872188	-0.415055	-0.390235
x3_hydroxybutyrate_p	enterococcus	0.00847452	0.0179853	0.110852	0.189442
x3_hydroxybutyrate_p	entomoplasma	-0.0327393	0.0801249	-0.00249837	0.0847476
x3_hydroxybutyrate_p	epibacterium	0.262054	0.423287	0.347437	0.314632
x3_hydroxybutyrate_p	ereboglobus	-0.0648643	-0.0315259	0.0463828	0.0610637
x3_hydroxybutyrate_p	erwinia	-0.157542	-0.0162397	-0.155171	-0.00152075
x3_hydroxybutyrate_p	erysipelatoclostridium	-0.169598	0.0235095	-0.188899	0.173845
x3_hydroxybutyrate_p	erysipelothrix	-0.0118742	0.392772	-0.110471	0.0785901
x3_hydroxybutyrate_p	erythrobacter	0.329057	0.581743	0.358896	0.294102
x3_hydroxybutyrate_p	escherichia	-0.302602	-0.112657	-0.291115	-0.284271
x3_hydroxybutyrate_p	ethanoligenens	0.0180208	0.144343	0.00369324	0.11058
x3_hydroxybutyrate_p	eubacterium	0.178246	0.3218	0.0777211	0.202803
x3_hydroxybutyrate_p	euzebya	-0.0287882	-0.0018194	0.0359548	0.118808
x3_hydroxybutyrate_p	exiguobacterium	0.115567	0.438167	0.0349772	0.152889
x3_hydroxybutyrate_p	ezakiella	0.236823	0.232804	0.297632	0.288972
x3_hydroxybutyrate_p	faecalibacterium	0.0627727	0.0735161	0.00934174	0.112807
x3_hydroxybutyrate_p	faecalibaculum	0.0281343	0.427887	0.0070063	0.0557245
x3_hydroxybutyrate_p	faecalitalea	0.00132198	0.151921	-0.0356289	0.110852
x3_hydroxybutyrate_p	fastidiosipila	-0.000612892	0.141179	-0.0515425	0.0816338
x3_hydroxybutyrate_p	fermentimonas	0.117303	0.112513	0.242342	0.257332
x3_hydroxybutyrate_p	ferrimonas	-0.168673	-0.0193179	-0.156746	0.0657795
x3_hydroxybutyrate_p	ferroglobus	-0.18454	-0.0226196	-0.202314	0.100092
x3_hydroxybutyrate_p	ferroplasma	-0.20269	-0.0656937	-0.176189	0.0231291
x3_hydroxybutyrate_p	fervidobacterium	0.055582	0.247815	0.0180317	0.181803
x3_hydroxybutyrate_p	fibrella	0.191826	0.185578	0.306105	0.298265
x3_hydroxybutyrate_p	fibrobacter	0.107934	0.0682552	0.236368	0.193753
x3_hydroxybutyrate_p	fictibacillus	0.05687	0.233203	-0.0619162	0.0931458
x3_hydroxybutyrate_p	filifactor	0.0270944	0.192683	0.0789159	0.12796
x3_hydroxybutyrate_p	filimonas	0.287283	0.491867	0.376657	0.329712
x3_hydroxybutyrate_p	filomicrobium	-0.0030109	0.432738	-0.002607	0.104486
x3_hydroxybutyrate_p	fimbriimonas	0.128706	0.270889	0.0685966	0.174064
x3_hydroxybutyrate_p	finegoldia	0.0974477	0.228502	0.0782642	0.175755
x3_hydroxybutyrate_p	fischerella	0.106948	0.104018	0.0960244	0.179084
x3_hydroxybutyrate_p	flammeovirga	0.160209	0.163528	0.202314	0.235144
x3_hydroxybutyrate_p	flavisolibacter	0.163977	0.316197	0.258473	0.2995
x3_hydroxybutyrate_p	flavivirga	-0.0682348	-0.049383	0.0265045	0.0482309
x3_hydroxybutyrate_p	flavobacterium	0.31653	0.5156	0.371334	0.334727
x3_hydroxybutyrate_p	flavonifractor	0.121675	0.259838	0.0981425	0.171899
x3_hydroxybutyrate_p	flexistipes	-0.110278	-0.0343407	-0.0542581	0.219949
x3_hydroxybutyrate_p	fluoribacter	-0.256454	-0.113437	-0.184228	-0.0890018
x3_hydroxybutyrate_p	fluviicola	-0.0190974	-0.0228474	0.0863567	0.119003
x3_hydroxybutyrate_p	formosa	0.115014	0.170245	0.175212	0.256545
x3_hydroxybutyrate_p	francisella	0.144723	0.268376	0.0824462	0.176407
x3_hydroxybutyrate_p	frankia	0.0189841	0.321758	-0.0142299	0.0820661
x3_hydroxybutyrate_p	frateuria	0.135988	0.182117	0.176515	0.191123
x3_hydroxybutyrate_p	friedmanniella	-0.162362	-0.040562	-0.091788	0.00902076
x3_hydroxybutyrate_p	frischella	-0.12538	0.0646869	-0.0832609	0.107107
x3_hydroxybutyrate_p	frondihabitans	0.151578	0.322692	0.164892	0.22995
x3_hydroxybutyrate_p	fuerstia	0.012985	-0.0289113	0.131382	0.170849
x3_hydroxybutyrate_p	fusobacterium	-0.0414063	-0.00677199	-0.106072	-0.0223767
x3_hydroxybutyrate_p	gallibacterium	-0.276258	-0.0795319	-0.218879	-0.118536
x3_hydroxybutyrate_p	gallionella	0.152976	0.114372	0.221921	0.29835
x3_hydroxybutyrate_p	gardnerella	-0.145187	-0.0350499	-0.133174	-0.0163796
x3_hydroxybutyrate_p	geitlerinema	0.0720244	0.267052	0.0817402	0.138766
x3_hydroxybutyrate_p	gemella	-0.0851024	-0.00427538	-0.0775038	0.0410602
x3_hydroxybutyrate_p	geminocystis	0.046053	-0.00824029	-0.0894525	0.0876025
x3_hydroxybutyrate_p	gemmata	-0.0639736	0.13744	-0.0157506	0.0385662
x3_hydroxybutyrate_p	gemmatimonas	0.205823	0.405907	0.195579	0.251046
x3_hydroxybutyrate_p	gemmatirosa	-0.0296635	0.207643	0.0350315	0.0969231
x3_hydroxybutyrate_p	gemmobacter	-0.144141	0.295493	-0.215349	-0.0257238
x3_hydroxybutyrate_p	geoalkalibacter	-0.0541787	0.373277	-0.0278623	0.0262329
x3_hydroxybutyrate_p	geobacillus	0.0180193	0.156289	-0.0252553	0.0733761
x3_hydroxybutyrate_p	geobacter	0.00484145	0.299124	0.030415	0.113459
x3_hydroxybutyrate_p	geodermatophilus	-0.0830063	0.141046	-0.0518684	-0.0236487
x3_hydroxybutyrate_p	geoglobus	0.0607588	0.103271	-0.0221052	0.186459
x3_hydroxybutyrate_p	geosporobacter	-0.0242912	0.27459	0.0248751	0.091788
x3_hydroxybutyrate_p	gibbsiella	-0.223173	-0.0899904	-0.244134	-0.154753
x3_hydroxybutyrate_p	gilliamella	-0.0803611	0.222778	-0.135944	-0.0274089
x3_hydroxybutyrate_p	gillisia	-0.029097	0.0470148	0.0396481	0.0960121
x3_hydroxybutyrate_p	gilvibacter	0.229669	0.428572	0.323702	0.335542
x3_hydroxybutyrate_p	glaciecola	-0.00893049	0.629906	-0.121931	-0.0299177
x3_hydroxybutyrate_p	glaesserella	0.198134	0.324262	0.147078	0.219672
x3_hydroxybutyrate_p	gloeobacter	0.164146	0.263288	0.113947	0.22632
x3_hydroxybutyrate_p	gloeocapsa	0.165328	0.49559	0.0715838	0.17512
x3_hydroxybutyrate_p	gloeomargarita	-0.0932019	0.320993	-0.12872	-0.00998344
x3_hydroxybutyrate_p	gluconacetobacter	-0.125365	-0.0634222	-0.0996633	0.0261008
x3_hydroxybutyrate_p	gluconobacter	-0.0608516	0.301126	-0.0897784	0.115363
x3_hydroxybutyrate_p	glutamicibacter	-0.161523	0.164005	-0.176298	-0.0992283
x3_hydroxybutyrate_p	gordonia	0.205332	-0.0307183	0.214969	0.262601
x3_hydroxybutyrate_p	gordonibacter	0.123282	0.176947	0.0975994	0.142896
x3_hydroxybutyrate_p	gottschalkia	0.00889172	0.28722	-0.0568651	0.110284
x3_hydroxybutyrate_p	gramella	0.276253	0.44409	0.349935	0.31876
x3_hydroxybutyrate_p	granulibacter	0.131733	0.515734	0.11134	0.114933
x3_hydroxybutyrate_p	granulicella	0.0961823	0.35895	0.0316098	0.121935
x3_hydroxybutyrate_p	granulosicoccus	-0.00391698	0.683996	0.0230828	0.125418
x3_hydroxybutyrate_p	grimontia	-0.0734774	0.0421978	0.00972192	0.0619229
x3_hydroxybutyrate_p	gynuella	0.0599352	0.696549	0.0618075	0.102217
x3_hydroxybutyrate_p	haematospirillum	0.0979464	0.485105	0.0720726	0.211949
x3_hydroxybutyrate_p	haemophilus	-0.00431812	-0.0825346	0.0483381	0.100043
x3_hydroxybutyrate_p	hafnia	-0.0133169	-0.0114556	-0.0766891	0.0586574
x3_hydroxybutyrate_p	hahella	-0.127579	-0.0762466	-0.0671301	0.0503211
x3_hydroxybutyrate_p	halalkalicoccus	-0.192273	-0.0665819	-0.131979	0.0589564
x3_hydroxybutyrate_p	halanaeroarchaeum	0.00246897	0.1736	-0.0389963	0.278091
x3_hydroxybutyrate_p	halanaerobium	0.231248	0.376582	0.185368	0.306405
x3_hydroxybutyrate_p	haliangium	0.0373228	-0.0283106	0.151586	0.127719
x3_hydroxybutyrate_p	halioglobus	0.221633	0.338085	0.31474	0.291166
x3_hydroxybutyrate_p	haliscomenobacter	0.275077	0.374525	0.311699	0.309366
x3_hydroxybutyrate_p	haloarcula	-0.130158	0.0035714	-0.0792418	0.0273744
x3_hydroxybutyrate_p	halobacillus	-0.00532528	0.23734	-0.0429068	0.12595
x3_hydroxybutyrate_p	halobacteriovorax	0.00866309	0.0302384	0.00760374	0.235452
x3_hydroxybutyrate_p	halobacterium	-0.178216	-0.113259	-0.0588747	-0.0058697
x3_hydroxybutyrate_p	halobacteroides	-0.118372	0.10882	-0.124701	0.0556582
x3_hydroxybutyrate_p	halobiforma	0.220844	0.335419	0.186509	0.26233
x3_hydroxybutyrate_p	halocynthiibacter	-0.106335	-0.0281534	-0.0864654	0.126934
x3_hydroxybutyrate_p	halodesulfurarchaeum	0.117539	0.379835	0.121551	0.272273
x3_hydroxybutyrate_p	haloferax	0.259819	0.341375	0.344286	0.32784
x3_hydroxybutyrate_p	halogeometricum	-0.0874985	-0.0688054	-0.0561047	0.0703659
x3_hydroxybutyrate_p	halohasta	-0.164749	-0.069429	-0.175538	-0.0687815
x3_hydroxybutyrate_p	halomicrobium	-0.138604	0.34049	-0.208342	-0.0458221
x3_hydroxybutyrate_p	halomicronema	-0.109489	-0.00784877	-0.0688138	0.0811032
x3_hydroxybutyrate_p	halomonas	0.0575951	0.20048	0.0695742	0.164784
x3_hydroxybutyrate_p	halopenitus	-0.263767	0.00645642	-0.421627	-0.0724422
x3_hydroxybutyrate_p	halopiger	-0.116394	-0.0789502	-0.0111884	0.158534
x3_hydroxybutyrate_p	haloplanus	-0.0171295	0.0567263	-0.00532262	0.151029
x3_hydroxybutyrate_p	haloquadratum	-0.0489014	0.0518419	0.0371497	0.15123
x3_hydroxybutyrate_p	halorhabdus	-0.191698	0.171405	-0.271128	-0.12686
x3_hydroxybutyrate_p	halorhodospira	0.262197	0.717231	0.107702	0.170851
x3_hydroxybutyrate_p	halorientalis	-0.179138	-0.0804985	-0.116826	0.090599
x3_hydroxybutyrate_p	halorubrum	-0.254314	-0.0796138	-0.244949	-0.0450564
x3_hydroxybutyrate_p	halostagnicola	-0.201912	-0.045566	-0.168531	0.125561
x3_hydroxybutyrate_p	halotalea	0.12379	0.208153	0.16234	0.153961
x3_hydroxybutyrate_p	haloterrigena	0.106601	0.313997	0.207908	0.183122
x3_hydroxybutyrate_p	halothece	-0.325869	-0.0662901	-0.3432	-0.109781
x3_hydroxybutyrate_p	halothermothrix	-0.100856	-0.0291895	-0.0636542	0.037756
x3_hydroxybutyrate_p	halothiobacillus	0.0764086	0.168275	0.115631	0.149526
x3_hydroxybutyrate_p	hartmannibacter	0.0757912	0.411062	0.0549642	0.0928512
x3_hydroxybutyrate_p	helicobacter	0.0673507	-0.00828324	0.0644145	0.220834
x3_hydroxybutyrate_p	heliobacterium	0.00500531	0.227858	-0.0236802	0.121334
x3_hydroxybutyrate_p	herbaspirillum	-0.0425128	0.083127	-0.0617532	0.0591462
x3_hydroxybutyrate_p	herbinix	0.00835866	0.197999	-0.0803824	0.148382
x3_hydroxybutyrate_p	herbivorax	0.137767	0.507174	0.0559961	0.177982
x3_hydroxybutyrate_p	herminiimonas	-0.15892	-0.0416394	-0.142516	-0.0144257
x3_hydroxybutyrate_p	hippea	0.120064	0.754564	-0.0142842	0.227671
x3_hydroxybutyrate_p	hirschia	0.111204	0.580564	0.0152075	0.15179
x3_hydroxybutyrate_p	histophilus	0.222829	0.208357	0.177493	0.289971
x3_hydroxybutyrate_p	hoeflea	-0.0825979	0.261234	-0.115848	-0.00941036
x3_hydroxybutyrate_p	homo	-0.135635	-0.0752683	-0.127743	0.026939
x3_hydroxybutyrate_p	hoyosella	0.0719543	0.212767	0.0637628	0.189368
x3_hydroxybutyrate_p	hydrogenobacter	-0.0374066	0.225412	-0.106887	0.0114848
x3_hydroxybutyrate_p	hydrogenobaculum	-0.197769	0.003136	-0.222518	-0.104279
x3_hydroxybutyrate_p	hydrogenophaga	0.171799	0.460338	0.156583	0.164191
x3_hydroxybutyrate_p	hydrogenovibrio	-0.199916	-0.0987291	-0.207745	-0.0113104
x3_hydroxybutyrate_p	hydromonas	0.153634	0.172273	0.163209	0.285716
x3_hydroxybutyrate_p	hymenobacter	0.24852	0.2483	0.346405	0.346839
x3_hydroxybutyrate_p	hyperthermus	-0.0951805	0.584359	-0.181349	0.158332
x3_hydroxybutyrate_p	hyphomicrobium	0.00629176	0.284476	0.0534434	0.169962
x3_hydroxybutyrate_p	hyphomonas	0.123685	0.347118	0.0239518	0.101809
x3_hydroxybutyrate_p	ichthyobacterium	0.173704	0.274712	0.0658266	0.221226
x3_hydroxybutyrate_p	idiomarina	-0.00788853	0.0379815	-0.07267	0.048501
x3_hydroxybutyrate_p	ignavibacterium	0.0530796	0.481171	0.00581143	0.068563
x3_hydroxybutyrate_p	ignicoccus	-0.189283	-0.0658221	-0.188301	0.026568
x3_hydroxybutyrate_p	ilyobacter	-0.0140868	-0.0340481	0.0664241	0.0949484
x3_hydroxybutyrate_p	immundisolibacter	-0.0536711	0.00837729	-0.0794591	-0.0215781
x3_hydroxybutyrate_p	intestinimonas	0.135029	0.327627	0.0969477	0.179774
x3_hydroxybutyrate_p	intrasporangium	-0.174243	0.224658	-0.22909	-0.00989992
x3_hydroxybutyrate_p	isoptericola	-0.069256	-0.0264213	-0.0264501	0.108138
x3_hydroxybutyrate_p	isosphaera	0.000860084	-0.00749239	0.0404084	0.207309
x3_hydroxybutyrate_p	janibacter	0.0260128	-0.0339769	0.0814143	0.190759
x3_hydroxybutyrate_p	jannaschia	0.103725	0.675357	-0.0289485	0.130005
x3_hydroxybutyrate_p	janthinobacterium	0.110853	0.155122	0.0950467	0.127013
x3_hydroxybutyrate_p	jatrophihabitans	0.106003	0.207744	0.117423	0.148649
x3_hydroxybutyrate_p	jeongeupia	0.166811	0.308698	0.156637	0.193264
x3_hydroxybutyrate_p	jeotgalibaca	-0.00949392	0.1438	0.0193352	0.136665
x3_hydroxybutyrate_p	jeotgalibacillus	0.19659	0.566212	0.119324	0.225077
x3_hydroxybutyrate_p	jeotgalicoccus	0.0971183	0.275043	-0.00852705	0.192516
x3_hydroxybutyrate_p	jiangella	-0.109612	0.125525	-0.0227026	0.0712985
x3_hydroxybutyrate_p	jonesia	-0.112424	0.222161	-0.140235	-0.0166234
x3_hydroxybutyrate_p	jonquetella	0.0848604	0.0833588	0.0397024	0.0988754
x3_hydroxybutyrate_p	kangiella	0.0394855	-0.0125521	-0.0383989	0.112698
x3_hydroxybutyrate_p	ketobacter	-0.0186573	0.132203	-0.0497502	0.0797794
x3_hydroxybutyrate_p	ketogulonicigenium	-0.121455	0.179572	-0.106398	0.0197998
x3_hydroxybutyrate_p	kibdelosporangium	-0.057712	0.0312761	-0.0707148	0.0645708
x3_hydroxybutyrate_p	kineococcus	-0.13089	-0.059124	-0.0494243	0.123871
x3_hydroxybutyrate_p	kingella	-0.0605758	-0.067906	0.172116	0.31384
x3_hydroxybutyrate_p	kiritimatiella	-0.124239	-0.0675913	-0.0329676	0.00641496
x3_hydroxybutyrate_p	kitasatospora	0.0998838	0.522589	-0.0386161	0.103303
x3_hydroxybutyrate_p	klebsiella	-0.292504	-0.100289	-0.346405	-0.312948
x3_hydroxybutyrate_p	kluyvera	-0.130035	-0.0794385	-0.0746253	0.00597761
x3_hydroxybutyrate_p	kocuria	0.0329349	-0.0323762	0.0253096	0.139854
x3_hydroxybutyrate_p	komagataeibacter	-0.0125191	0.241849	-0.0329676	0.0441017
x3_hydroxybutyrate_p	kosakonia	-0.201079	-0.0767465	-0.0507278	-0.0868456
x3_hydroxybutyrate_p	kosmotoga	-0.127343	-0.0137946	-0.021725	0.111902
x3_hydroxybutyrate_p	kozakia	-0.043703	0.425025	-0.0989029	0.0236075
x3_hydroxybutyrate_p	kribbella	-0.219457	-0.123886	-0.0741364	-0.053006
x3_hydroxybutyrate_p	kurthia	-0.00817921	0.0696351	-0.0175429	0.123268
x3_hydroxybutyrate_p	kushneria	-0.336093	-0.0769757	-0.393548	-0.187106
x3_hydroxybutyrate_p	kutzneria	0.0778718	0.590797	-0.0661525	0.0328769
x3_hydroxybutyrate_p	kyrpidia	0.313249	0.738946	0.176407	0.176285
x3_hydroxybutyrate_p	kytococcus	0.0218598	-0.0325301	0.175212	0.170746
x3_hydroxybutyrate_p	labrenzia	0.207633	0.450945	0.190582	0.196068
x3_hydroxybutyrate_p	laceyella	-0.217309	0.131962	-0.256572	-0.0669147
x3_hydroxybutyrate_p	lachnoclostridium	-0.160937	-0.103161	-0.149576	-0.125299
x3_hydroxybutyrate_p	lacimicrobium	0.0850552	0.285446	0.0809798	0.140256
x3_hydroxybutyrate_p	lacinutrix	0.115592	0.200767	0.106507	0.112384
x3_hydroxybutyrate_p	lactobacillus	0.0191583	0.0568101	0.0989572	0.200087
x3_hydroxybutyrate_p	lactococcus	-0.0769521	0.0128277	-0.0623507	0.0374756
x3_hydroxybutyrate_p	lacunisphaera	-0.00373055	-0.046079	0.0867912	0.117263
x3_hydroxybutyrate_p	laribacter	0.0818413	0.104901	0.149957	0.133569
x3_hydroxybutyrate_p	lawsonella	-0.0337948	0.124274	-0.124593	0.144474
x3_hydroxybutyrate_p	lawsonia	-0.143995	0.0428659	-0.106072	-0.0931982
x3_hydroxybutyrate_p	leadbetterella	0.212088	0.304268	0.239518	0.245091
x3_hydroxybutyrate_p	leclercia	-0.206263	-0.0393675	-0.325386	-0.254291
x3_hydroxybutyrate_p	legionella	0.0418072	0.363861	0.0138497	0.162611
x3_hydroxybutyrate_p	leifsonia	0.170507	0.335259	0.153867	0.181477
x3_hydroxybutyrate_p	leisingera	-0.194605	-0.0293122	-0.16587	-0.0392395
x3_hydroxybutyrate_p	lelliottia	-0.170192	-0.0924368	-0.139854	-0.0370411
x3_hydroxybutyrate_p	leminorella	-0.082136	-0.0391263	-0.0232457	0.0518361
x3_hydroxybutyrate_p	lentibacillus	-0.0246073	0.151879	-0.114925	0.0441608
x3_hydroxybutyrate_p	lentzea	-0.190305	-0.0763495	-0.190039	-0.0726933
x3_hydroxybutyrate_p	leptolyngbya	-0.00801478	0.186902	-0.0139583	0.0106464
x3_hydroxybutyrate_p	leptospira	0.0818466	0.266036	-0.00342168	0.138779
x3_hydroxybutyrate_p	leptospirillum	-0.00899054	0.10053	-0.069357	0.0801017
x3_hydroxybutyrate_p	leptothrix	0.274219	0.361038	0.31284	0.261602
x3_hydroxybutyrate_p	leptotrichia	-0.0393259	0.0867667	-0.0646861	0.0913535
x3_hydroxybutyrate_p	leuconostoc	-0.0795676	-0.0249488	-0.0608842	0.0379644
x3_hydroxybutyrate_p	libanicoccus	0.077029	0.0427421	0.122637	0.156637
x3_hydroxybutyrate_p	liberibacter	0.034627	0.0178993	-0.00157506	0.142406
x3_hydroxybutyrate_p	limnobaculum	-0.29169	-0.100716	-0.328807	-0.122008
x3_hydroxybutyrate_p	limnochorda	0.0871261	0.418212	0.0489355	0.0921096
x3_hydroxybutyrate_p	limnohabitans	0.062802	0.0605662	0.0771779	0.175422
x3_hydroxybutyrate_p	listeria	0.0720807	0.225413	-0.0312296	0.168043
x3_hydroxybutyrate_p	luteibacter	-0.159996	0.00977661	-0.165816	-0.0283349
x3_hydroxybutyrate_p	luteimonas	-0.0546632	0.119655	-0.0255811	0.126419
x3_hydroxybutyrate_p	luteipulveratus	0.0205874	0.0255017	0.0538779	0.186337
x3_hydroxybutyrate_p	luteitalea	-0.034101	0.0910509	-0.128177	0.0491015
x3_hydroxybutyrate_p	lutibacter	0.163677	0.186185	0.127634	0.26068
x3_hydroxybutyrate_p	lysinibacillus	0.241543	0.415724	0.315664	0.33957
x3_hydroxybutyrate_p	lysobacter	-0.0299705	0.108849	-0.0762003	0.0888847
x3_hydroxybutyrate_p	macrococcus	0.188369	0.263324	0.1568	0.229307
x3_hydroxybutyrate_p	mageeibacillus	-0.159244	0.119422	-0.233109	-0.0328047
x3_hydroxybutyrate_p	magnetococcus	0.154048	0.476694	0.142624	0.225747
x3_hydroxybutyrate_p	magnetospira	-0.0367205	0.323517	-0.0972735	0.0447003
x3_hydroxybutyrate_p	magnetospirillum	0.00342061	0.234243	-0.0347599	0.0899957
x3_hydroxybutyrate_p	mahella	0.217745	0.320821	0.217684	0.320889
x3_hydroxybutyrate_p	mannheimia	-0.0849192	0.139057	-0.0946665	0.052846
x3_hydroxybutyrate_p	maribacter	0.121741	0.120407	0.0981425	0.255242
x3_hydroxybutyrate_p	maricaulis	-0.0806901	0.332562	-0.111721	0.0593096
x3_hydroxybutyrate_p	marichromatium	0.03297	0.0848606	0.0579513	0.0710671
x3_hydroxybutyrate_p	marinilactibacillus	-0.00836791	0.182609	-0.0908647	0.0549657
x3_hydroxybutyrate_p	marinithermus	-0.0818076	-0.0439664	0.00868999	0.120262
x3_hydroxybutyrate_p	marinitoga	0.154777	0.30151	0.154845	0.207231
x3_hydroxybutyrate_p	marinobacter	-0.00114925	0.30791	0.00733218	0.132468
x3_hydroxybutyrate_p	marinobacterium	0.0628637	0.22188	0.02607	0.0513531
x3_hydroxybutyrate_p	marinomonas	0.0869498	0.0609367	0.226103	0.239524
x3_hydroxybutyrate_p	marinovum	-0.0594963	0.22193	-0.0753313	0.106934
x3_hydroxybutyrate_p	mariprofundus	0.0234793	0.137573	0.0219965	0.174645
x3_hydroxybutyrate_p	marivirga	0.12718	0.246513	0.163589	0.265439
x3_hydroxybutyrate_p	marivivens	-0.024954	0.0610231	0.0146644	0.165418
x3_hydroxybutyrate_p	marmoricola	0.200322	-0.0233339	0.203889	0.349126
x3_hydroxybutyrate_p	martelella	-0.0601055	0.391989	-0.160276	0.00209108
x3_hydroxybutyrate_p	massilia	0.105016	0.227709	0.123832	0.194221
x3_hydroxybutyrate_p	megamonas	0.138726	0.171121	0.0180317	0.106398
x3_hydroxybutyrate_p	megasphaera	0.0493265	-0.0288208	0.096133	0.249403
x3_hydroxybutyrate_p	meiothermus	0.177398	0.150598	0.144851	0.119139
x3_hydroxybutyrate_p	melaminivora	0.00283512	0.0625338	0.070932	0.140436
x3_hydroxybutyrate_p	melioribacter	0.172603	0.440794	0.23148	0.236158
x3_hydroxybutyrate_p	melissococcus	-0.207689	0.518141	-0.329894	-0.165339
x3_hydroxybutyrate_p	melittangium	-0.0134244	-0.0213686	0.0825549	0.120359
x3_hydroxybutyrate_p	mesoplasma	0.0436898	0.300733	0.00847274	0.141895
x3_hydroxybutyrate_p	mesorhizobium	-0.0210221	0.221327	-0.0206387	0.030415
x3_hydroxybutyrate_p	mesotoga	0.0962652	0.0413342	0.211058	0.237959
x3_hydroxybutyrate_p	metallosphaera	-0.20201	-0.0224853	-0.236694	-0.0129435
x3_hydroxybutyrate_p	methanobacterium	-0.115699	0.0782378	-0.0144471	0.125149
x3_hydroxybutyrate_p	methanobrevibacter	0.122401	0.0411312	0.00244406	0.136378
x3_hydroxybutyrate_p	methanocaldococcus	0.126217	0.0946463	0.103194	0.215862
x3_hydroxybutyrate_p	methanocella	0.107686	0.389058	0.0738106	0.148784
x3_hydroxybutyrate_p	methanococcoides	-0.191952	0.043777	-0.241962	-0.0301264
x3_hydroxybutyrate_p	methanococcus	0.102172	0.413672	0.0565935	0.166486
x3_hydroxybutyrate_p	methanocorpusculum	0.0103833	0.206032	0.0849989	0.145841
x3_hydroxybutyrate_p	methanoculleus	0.243563	-0.00676884	0.307517	0.330328
x3_hydroxybutyrate_p	methanofollis	0.191079	0.000823321	0.172496	0.220187
x3_hydroxybutyrate_p	methanohalobium	-0.0821509	0.219852	-0.100424	0.0787053
x3_hydroxybutyrate_p	methanohalophilus	0.0357969	0.267103	-0.0117315	0.129378
x3_hydroxybutyrate_p	methanolacinia	-0.152654	-0.0722099	-0.0643059	0.014976
x3_hydroxybutyrate_p	methanolinea	-0.234112	-0.0412619	-0.260102	-0.00518641
x3_hydroxybutyrate_p	methanolobus	0.14526	0.402118	0.20541	0.330027
x3_hydroxybutyrate_p	methanomassiliicoccus	0.222691	0.213025	0.209537	0.318994
x3_hydroxybutyrate_p	methanomethylovorans	0.0160146	0.0312753	0.090919	0.155678
x3_hydroxybutyrate_p	methanoplanus	0.399054	0.278741	0.474962	0.512375
x3_hydroxybutyrate_p	methanopyrus	-0.0248097	0.174794	-0.099609	0.173835
x3_hydroxybutyrate_p	methanoregula	-0.194412	-0.0842255	-0.0968934	-0.0301893
x3_hydroxybutyrate_p	methanosalsum	-0.0626128	0.40678	-0.113296	0.0195652
x3_hydroxybutyrate_p	methanosarcina	0.180179	0.26512	0.177276	0.24924
x3_hydroxybutyrate_p	methanosphaera	-0.018139	0.366082	-0.0730502	0.0691915
x3_hydroxybutyrate_p	methanosphaerula	-0.244268	0.0520572	-0.315066	-0.0398209
x3_hydroxybutyrate_p	methanospirillum	0.123609	0.536694	0.033728	0.265444
x3_hydroxybutyrate_p	methanothermobacter	0.212713	-0.0287685	0.256518	0.33174
x3_hydroxybutyrate_p	methanothermococcus	-0.208629	-0.0191056	-0.294699	-0.0797402
x3_hydroxybutyrate_p	methanothermus	-0.0602209	0.0261269	-0.158755	0.142501
x3_hydroxybutyrate_p	methanothrix	0.135751	0.685931	0.0574625	0.136175
x3_hydroxybutyrate_p	methanotorris	-0.179531	-0.0670424	-0.181295	0.0444121
x3_hydroxybutyrate_p	methylacidiphilum	-0.202795	-0.0639912	-0.0988486	-0.00100439
x3_hydroxybutyrate_p	methylibium	-0.131914	0.0697507	-0.105475	-0.0327
x3_hydroxybutyrate_p	methylobacillus	0.0171035	0.0655578	0.0594178	0.108869
x3_hydroxybutyrate_p	methylobacterium	0.0674021	-0.0274291	0.0920052	0.142461
x3_hydroxybutyrate_p	methyloceanibacter	0.195179	0.298449	0.0852705	0.171333
x3_hydroxybutyrate_p	methylocella	0.189767	0.199294	0.24408	0.315598
x3_hydroxybutyrate_p	methylococcus	-0.136121	0.00240647	-0.0504562	-0.0109478
x3_hydroxybutyrate_p	methylocystis	-0.145924	0.158205	-0.232403	-0.028223
x3_hydroxybutyrate_p	methylomicrobium	0.0196505	0.0732397	0.0621334	0.186173
x3_hydroxybutyrate_p	methylomonas	0.200725	0.314849	0.252173	0.28088
x3_hydroxybutyrate_p	methylophaga	-0.0138608	0.294663	0.00988486	0.0675177
x3_hydroxybutyrate_p	methylophilus	0.0286018	0.0730102	0.115088	0.21233
x3_hydroxybutyrate_p	methylorubrum	0.0898965	-0.0314774	0.19786	0.223333
x3_hydroxybutyrate_p	methylosinus	0.125618	0.125306	0.0775581	0.235686
x3_hydroxybutyrate_p	methylotenera	0.127032	0.169339	0.225505	0.251397
x3_hydroxybutyrate_p	methyloversatilis	0.0268641	0.422558	0.0333478	0.0768061
x3_hydroxybutyrate_p	methylovorus	-0.035153	0.102151	-0.0564306	0.0343835
x3_hydroxybutyrate_p	methylovulum	-0.175835	-0.029715	-0.0499674	0.0989566
x3_hydroxybutyrate_p	micavibrio	-0.00745409	0.68551	-0.103248	0.0109771
x3_hydroxybutyrate_p	microbacterium	-0.123673	-0.0316434	-0.0854877	0.0194982
x3_hydroxybutyrate_p	microbulbifer	-0.00844102	0.289122	-0.124267	0.0593635
x3_hydroxybutyrate_p	microcella	-0.185504	-0.0896038	-0.0558332	0.0335007
x3_hydroxybutyrate_p	microchaete	-0.257692	-0.0781299	-0.311916	-0.12302
x3_hydroxybutyrate_p	micrococcus	-0.0627392	-0.0337502	0.0388334	0.138062
x3_hydroxybutyrate_p	microcoleus	-0.132009	-0.0753335	-0.00298718	0.112002
x3_hydroxybutyrate_p	microcystis	0.231129	0.364633	0.204649	0.265406
x3_hydroxybutyrate_p	microlunatus	-0.15867	-0.0841932	-0.0733761	0.0598045
x3_hydroxybutyrate_p	micromonospora	-0.124727	-0.033134	-0.0476863	0.0126548
x3_hydroxybutyrate_p	micropruina	0.112215	0.137	0.208886	0.256151
x3_hydroxybutyrate_p	microterricola	-0.108879	0.00460933	-0.0644688	0.103358
x3_hydroxybutyrate_p	microvirga	0.181307	0.346163	0.173908	0.237182
x3_hydroxybutyrate_p	microvirgula	0.294848	0.329791	0.236856	0.266047
x3_hydroxybutyrate_p	miniimonas	0.00674408	0.244489	0.0340539	0.118349
x3_hydroxybutyrate_p	mitsuaria	0.105265	0.0615693	0.107593	0.15982
x3_hydroxybutyrate_p	mobiluncus	-0.0336598	-0.032679	0.0142842	0.0664421
x3_hydroxybutyrate_p	modestobacter	-0.0762613	-0.0102007	0.0437758	0.0906203
x3_hydroxybutyrate_p	mogibacterium	0.165898	0.35357	0.192646	0.261623
x3_hydroxybutyrate_p	monoglobus	0.166533	0.498236	0.164675	0.189876
x3_hydroxybutyrate_p	moorea	-0.251563	-0.0963229	-0.20264	-0.0171558
x3_hydroxybutyrate_p	moorella	0.0250823	0.192805	-0.029383	0.174234
x3_hydroxybutyrate_p	moraxella	0.284711	0.0446195	0.377417	0.31322
x3_hydroxybutyrate_p	mordavella	-0.0578389	0.0907752	-0.169781	0.0632197
x3_hydroxybutyrate_p	morganella	-0.158008	-0.0733031	-0.280415	-0.219096
x3_hydroxybutyrate_p	moritella	-0.0652654	0.0608325	-0.0808169	-0.0208673
x3_hydroxybutyrate_p	mucilaginibacter	0.21423	0.354159	0.291821	0.351401
x3_hydroxybutyrate_p	mucinivorans	0.314731	0.160331	0.433848	0.448186
x3_hydroxybutyrate_p	murdochiella	-0.0528064	0.156338	-0.0848903	0.0923854
x3_hydroxybutyrate_p	muribaculum	0.0590113	0.0375475	0.143005	0.201662
x3_hydroxybutyrate_p	muricauda	0.173866	0.413209	0.263415	0.291337
x3_hydroxybutyrate_p	mycetocola	-0.0325704	0.066281	-0.0433956	0.0974819
x3_hydroxybutyrate_p	mycobacterium	0.149855	0.271088	0.227623	0.214697
x3_hydroxybutyrate_p	mycobacteroides	-0.015342	-0.021571	-0.0649033	0.0829894
x3_hydroxybutyrate_p	mycolicibacter	-0.0848187	0.0690136	-0.0914078	-0.0366623
x3_hydroxybutyrate_p	mycolicibacterium	0.105152	0.189427	0.0784814	0.19433
x3_hydroxybutyrate_p	mycoplasma	0.173026	0.356978	0.170269	0.216326
x3_hydroxybutyrate_p	myroides	0.158901	0.224627	0.179883	0.204383
x3_hydroxybutyrate_p	myxococcus	0.0896051	0.110103	0.152455	0.129511
x3_hydroxybutyrate_p	nakamurella	0.0443559	0.0297112	0.0653378	0.15048
x3_hydroxybutyrate_p	natranaerobius	0.111626	0.1031	0.152998	0.19321
x3_hydroxybutyrate_p	natrialba	-0.00574815	0.190653	0.0305779	0.10598
x3_hydroxybutyrate_p	natrinema	-0.168498	-0.0731049	-0.065881	0.0352215
x3_hydroxybutyrate_p	natronobacterium	-0.0984748	0.331949	-0.14295	0.0237524
x3_hydroxybutyrate_p	natronococcus	-0.136785	0.093493	-0.179557	0.0797499
x3_hydroxybutyrate_p	natronomonas	0.0689684	0.0287228	0.0689225	0.367775
x3_hydroxybutyrate_p	nautilia	0.275158	0.388838	0.186183	0.285435
x3_hydroxybutyrate_p	ndongobacter	-0.0744602	0.248362	-0.158484	-0.00991229
x3_hydroxybutyrate_p	negativicoccus	0.0156905	0.0920068	0.169781	0.216
x3_hydroxybutyrate_p	neisseria	0.0957252	0.2388	0.151586	0.222681
x3_hydroxybutyrate_p	neoasaia	0.0674985	0.124817	0.00206387	0.122233
x3_hydroxybutyrate_p	neomicrococcus	-0.237341	-0.111064	-0.188138	-0.0377133
x3_hydroxybutyrate_p	neorhizobium	-0.0994867	-0.00919591	-0.176461	-0.0302808
x3_hydroxybutyrate_p	neorickettsia	0.294498	0.356222	0.190691	0.271072
x3_hydroxybutyrate_p	niabella	0.0921815	0.276811	0.0448077	0.183853
x3_hydroxybutyrate_p	niastella	-0.0528344	0.0350053	0.0656637	0.112222
x3_hydroxybutyrate_p	nitratifractor	0.0179734	0.469929	-0.1272	-0.0897551
x3_hydroxybutyrate_p	nitratireductor	-0.0825577	0.0219996	-0.0654465	-0.00630092
x3_hydroxybutyrate_p	nitratiruptor	0.224426	0.774996	0.00820117	0.192227
x3_hydroxybutyrate_p	nitrobacter	-0.22335	0.00901303	-0.135564	0.0410452
x3_hydroxybutyrate_p	nitrosococcus	0.0435213	0.235678	-0.0886379	0.0558524
x3_hydroxybutyrate_p	nitrosomonas	-0.147511	0.111014	-0.170215	-0.0524672
x3_hydroxybutyrate_p	nitrosopumilus	-0.174251	0.169687	-0.222192	-0.0290165
x3_hydroxybutyrate_p	nitrososphaera	-0.227374	-0.106336	-0.290734	-0.0935532
x3_hydroxybutyrate_p	nitrosospira	-0.114918	-0.0138339	-0.0853791	0
x3_hydroxybutyrate_p	nitrospira	0.157766	0.557223	0.154845	0.152595
x3_hydroxybutyrate_p	nitrospirillum	0.219116	0.33273	0.251032	0.231651
x3_hydroxybutyrate_p	niveispirillum	0.231148	0.288454	0.222409	0.293376
x3_hydroxybutyrate_p	nocardia	0.138412	0.400273	0.198403	0.22431
x3_hydroxybutyrate_p	nocardioides	-0.0844129	0.0447735	-0.0268303	0.0588203
x3_hydroxybutyrate_p	nocardiopsis	-0.079802	0.00468116	-0.117912	-0.000841865
x3_hydroxybutyrate_p	nodularia	-0.102247	0.213316	-0.13589	0.124328
x3_hydroxybutyrate_p	nonlabens	0.23119	0.226003	0.265696	0.253965
x3_hydroxybutyrate_p	nonomuraea	-0.0743949	-0.00682048	-0.0539322	-0.0213229
x3_hydroxybutyrate_p	nostoc	0.261142	0.2293	0.217901	0.277645
x3_hydroxybutyrate_p	novibacillus	0.0393918	0.0910697	0.0192809	0.163852
x3_hydroxybutyrate_p	novosphingobium	0.177972	0.250366	0.19786	0.208209
x3_hydroxybutyrate_p	obesumbacterium	-0.0272207	0.0113808	0.0197697	0.0226543
x3_hydroxybutyrate_p	oblitimonas	-0.0893128	-0.037574	-0.00608299	0.119687
x3_hydroxybutyrate_p	oceanicoccus	0.13425	0.211956	0.0983055	0.301556
x3_hydroxybutyrate_p	oceanimonas	-0.0169288	0.044245	5.43124164886137e-05	0.0629923
x3_hydroxybutyrate_p	oceanisphaera	-0.00563299	0.0663304	0.0263958	0.0723586
x3_hydroxybutyrate_p	oceanithermus	-0.0163584	0.00139677	0.0204215	0.105323
x3_hydroxybutyrate_p	oceanobacillus	0.0776503	0.21916	0.0102107	0.125584
x3_hydroxybutyrate_p	ochrobactrum	0.0180417	0.339837	0.0298175	0.089887
x3_hydroxybutyrate_p	octadecabacter	-0.0857422	0.274428	-0.158701	-0.0368353
x3_hydroxybutyrate_p	odoribacter	-0.00595728	-0.00630378	0.014773	0.0948838
x3_hydroxybutyrate_p	oenococcus	0.0953024	0.377718	0.0239518	0.168523
x3_hydroxybutyrate_p	oleiphilus	0.12183	0.268371	0.127906	0.190062
x3_hydroxybutyrate_p	oleispira	-0.0320582	0.104678	-0.00238975	0.131344
x3_hydroxybutyrate_p	oligella	-0.21132	-0.107598	-0.187432	-0.13031
x3_hydroxybutyrate_p	oligotropha	-0.190922	-0.0912229	-0.136053	-0.0528147
x3_hydroxybutyrate_p	olleya	0.171024	0.549714	0.146915	0.235556
x3_hydroxybutyrate_p	olsenella	0.0216955	0.262424	0.0873344	0.198023
x3_hydroxybutyrate_p	opitutus	0.0499705	0.0458246	0.121062	0.118678
x3_hydroxybutyrate_p	orientia	0.0224769	0.216036	0.0320443	0.107274
x3_hydroxybutyrate_p	ornithobacterium	-0.186051	-0.100514	-0.0346513	-0.0645232
x3_hydroxybutyrate_p	orrella	-0.0801748	0.04517	-0.0412774	0.0406876
x3_hydroxybutyrate_p	oscillatoria	-0.0755613	-0.0355481	-0.0849989	0.0529778
x3_hydroxybutyrate_p	oscillibacter	0.164517	0.250086	0.0690854	0.172333
x3_hydroxybutyrate_p	ottowia	0.0552912	-0.01158	0.0819031	0.148693
x3_hydroxybutyrate_p	owenweeksia	0.158738	0.0630838	0.287801	0.279622
x3_hydroxybutyrate_p	oxalobacter	0.107154	0.258055	0.00760374	0.121883
x3_hydroxybutyrate_p	paenalcaligenes	0.0783793	0.323922	0.0131436	0.0339908
x3_hydroxybutyrate_p	paenarthrobacter	-0.264729	-0.11127	-0.222952	-0.0532495
x3_hydroxybutyrate_p	paenibacillus	0.0479174	0.360808	0.117912	0.185911
x3_hydroxybutyrate_p	paeniclostridium	-0.116869	-0.0485314	-0.0936889	0.001738
x3_hydroxybutyrate_p	pajaroellobacter	-0.0885519	0.0108212	-0.0985227	0.170655
x3_hydroxybutyrate_p	palaeococcus	0.0701161	0.256608	0.0956985	0.294798
x3_hydroxybutyrate_p	paludibacter	0.198817	0.28652	0.314686	0.304291
x3_hydroxybutyrate_p	paludisphaera	0.0905146	-0.0125653	0.266565	0.233118
x3_hydroxybutyrate_p	pandoraea	0.0209271	0.203697	0.0456224	0.110471
x3_hydroxybutyrate_p	pannonibacter	-0.0348679	0.355883	-0.0759288	0.0819031
x3_hydroxybutyrate_p	pantoea	-0.206404	-0.0225427	-0.136541	-0.064849
x3_hydroxybutyrate_p	parabacteroides	-0.152789	-0.105467	-0.116174	-0.0600152
x3_hydroxybutyrate_p	paraburkholderia	0.00380369	0.306784	0.0712579	0.126602
x3_hydroxybutyrate_p	parachlamydia	-0.257043	-0.0941258	-0.202803	-0.0623443
x3_hydroxybutyrate_p	paracoccus	-0.12471	0.075585	-0.179937	0.00483381
x3_hydroxybutyrate_p	parageobacillus	-0.0284621	0.39037	-0.138497	0.0405714
x3_hydroxybutyrate_p	paraglaciecola	-0.191834	-0.0362824	-0.205029	0.0199067
x3_hydroxybutyrate_p	paraliobacillus	0.0575954	0.300603	-0.0568651	0.114828
x3_hydroxybutyrate_p	paraoerskovia	-0.0494076	0.0505363	-0.0985227	0.128676
x3_hydroxybutyrate_p	paraphotobacterium	-0.223415	-0.046462	-0.299805	-0.156514
x3_hydroxybutyrate_p	pararhodospirillum	-0.0397134	0.336714	-0.138768	-0.0374892
x3_hydroxybutyrate_p	parasaccharibacter	0.189705	0.39664	0.191125	0.194709
x3_hydroxybutyrate_p	parascardovia	-0.318209	-0.0833866	-0.202314	-0.0728078
x3_hydroxybutyrate_p	parvibaculum	0.0488964	0.014425	0.104443	0.188887
x3_hydroxybutyrate_p	parvimonas	-0.0158493	-0.0430055	-0.0413861	0.0821498
x3_hydroxybutyrate_p	parvularcula	-0.241365	-0.0826374	-0.220237	-0.0588912
x3_hydroxybutyrate_p	pasteurella	0.176019	0.174557	0.160439	0.242233
x3_hydroxybutyrate_p	paucibacter	0.283832	0.14482	0.235444	0.273608
x3_hydroxybutyrate_p	paucimonas	0.170081	0.147828	0.130078	0.239963
x3_hydroxybutyrate_p	pectobacterium	-0.0102378	0.215918	0.0150989	0.079622
x3_hydroxybutyrate_p	pediococcus	0.106071	0.100869	0.152889	0.258636
x3_hydroxybutyrate_p	pedobacter	0.216213	0.55378	0.262872	0.302574
x3_hydroxybutyrate_p	pelagibaca	0.0438472	0.286881	0.00331306	0.116188
x3_hydroxybutyrate_p	pelagibacterium	-0.166176	-0.0327459	-0.133283	-0.0608138
x3_hydroxybutyrate_p	pelobacter	0.0538427	0.292362	-0.0251466	0.1039
x3_hydroxybutyrate_p	pelodictyon	0.273271	0.281316	0.356996	0.345682
x3_hydroxybutyrate_p	pelosinus	0.0206168	0.150952	-0.0179231	0.0971106
x3_hydroxybutyrate_p	peptoclostridium	-0.0267589	0.160458	-0.0299261	0.0886379
x3_hydroxybutyrate_p	peptoniphilus	-0.192006	0.0133868	-0.199381	-0.0235741
x3_hydroxybutyrate_p	persephonella	-0.116019	0.0016408	-0.0934717	-0.0497162
x3_hydroxybutyrate_p	persicobacter	0.204295	0.112745	0.285412	0.323497
x3_hydroxybutyrate_p	petrimonas	0.176175	0.328895	0.182164	0.184445
x3_hydroxybutyrate_p	petrotoga	0.232211	0.635433	0.27091	0.262436
x3_hydroxybutyrate_p	phaeobacter	0.231862	0.570218	0.181241	0.298936
x3_hydroxybutyrate_p	phenylobacterium	0.028598	0.128545	0.00988486	0.0352279
x3_hydroxybutyrate_p	phoenicibacter	-0.164077	0.0505161	-0.156854	-0.0644977
x3_hydroxybutyrate_p	photobacterium	0.117886	0.265376	0.0873887	0.165001
x3_hydroxybutyrate_p	photorhabdus	-0.0726935	0.353163	-0.0672931	0.0570296
x3_hydroxybutyrate_p	phreatobacter	0.00723987	0.139514	-0.0759831	0.0150527
x3_hydroxybutyrate_p	phycicoccus	-0.0592094	0.0122262	0.0429068	0.154995
x3_hydroxybutyrate_p	phycisphaera	-0.0468996	0.00256723	0.0379101	0.0895105
x3_hydroxybutyrate_p	phyllobacterium	0.0906728	0.525055	0.0367152	0.12859
x3_hydroxybutyrate_p	phytobacter	-0.316257	-0.102573	-0.279003	-0.247246
x3_hydroxybutyrate_p	picrophilus	0.147393	0.489355	0.0236259	0.111088
x3_hydroxybutyrate_p	pimelobacter	0.00509067	-0.00134946	0.0624593	0.223603
x3_hydroxybutyrate_p	pirellula	-0.272943	-0.0841054	-0.0300348	0.109772
x3_hydroxybutyrate_p	piscirickettsia	-0.382509	-0.119242	-0.328916	-0.151898
x3_hydroxybutyrate_p	planctomyces	-0.0658286	0.169647	-0.0238975	0.0878256
x3_hydroxybutyrate_p	planctopirus	-0.0268441	0.0983011	0.0805453	0.185923
x3_hydroxybutyrate_p	planktomarina	0.0598626	0.0575628	0.0986313	0.173072
x3_hydroxybutyrate_p	planktothrix	-0.0224131	-0.0322252	0.0128177	0.113127
x3_hydroxybutyrate_p	planococcus	0.0696844	0.418997	-0.0306865	0.149088
x3_hydroxybutyrate_p	plantactinospora	-0.177487	-0.0228204	-0.178199	-0.0477588
x3_hydroxybutyrate_p	plantibacter	0.0874011	0.595751	0.085705	0.207182
x3_hydroxybutyrate_p	plesiomonas	-0.173501	-0.0380164	-0.207148	-0.167463
x3_hydroxybutyrate_p	pleurocapsa	-0.0638975	0.794359	-0.116229	-0.0301347
x3_hydroxybutyrate_p	pluralibacter	-0.163257	-0.0228205	-0.143113	-0.14572
x3_hydroxybutyrate_p	polaribacter	0.179138	0.30581	0.302086	0.313165
x3_hydroxybutyrate_p	polaromonas	0.0332461	0.419881	-0.0380187	0.084859
x3_hydroxybutyrate_p	polymorphum	0.0147073	0.0840831	0.0757115	0.185209
x3_hydroxybutyrate_p	polynucleobacter	0.112016	0.153781	0.103465	0.185971
x3_hydroxybutyrate_p	pontibacter	0.123317	0.31149	0.238323	0.259179
x3_hydroxybutyrate_p	pontimonas	-0.172609	-0.00439353	-0.185586	0.0556421
x3_hydroxybutyrate_p	porphyrobacter	0.142948	0.348008	0.169237	0.25282
x3_hydroxybutyrate_p	porphyromonas	0.159382	-0.0334742	0.34673	0.313328
x3_hydroxybutyrate_p	pragia	-0.318036	-0.0693315	-0.299044	-0.0603303
x3_hydroxybutyrate_p	prauserella	0.0546974	0.25059	0.0843472	0.189477
[truncated: 83,876 more rows]

## Sheet: Week 6
metabolite	microbe	pr.cor.log	pr.cor.og	sp.cor.log	sp.cor.og
x2_hydroxybutyrate_p	acaryochloris	-0.0153899	0.0104698	0.056336	-0.118854
x2_hydroxybutyrate_p	acetoanaerobium	0.0189426	0.138723	-0.0820786	-0.104315
x2_hydroxybutyrate_p	acetobacter	-0.0780465	-0.144529	-0.0888985	-0.142881
x2_hydroxybutyrate_p	acetobacterium	0.060618	-0.106329	0.0167135	-0.0332829
x2_hydroxybutyrate_p	acetohalobium	0.0698505	0.135543	0.0570084	-0.0497563
x2_hydroxybutyrate_p	acetomicrobium	0.00372474	-0.147767	0.00163293	-0.0641866
x2_hydroxybutyrate_p	acholeplasma	-0.0581823	-0.0550308	-0.035252	-0.0612348
x2_hydroxybutyrate_p	achromobacter	-0.243102	-0.161518	-0.179238	-0.0860649
x2_hydroxybutyrate_p	acidaminococcus	-0.151238	-0.0382588	-0.230051	-0.162668
x2_hydroxybutyrate_p	acidianus	0.0165757	-0.131804	-0.036933	-0.0537589
x2_hydroxybutyrate_p	acidiferrobacter	0.388617	0.28709	0.357131	0.270387
x2_hydroxybutyrate_p	acidihalobacter	0.000699299	-0.0768355	-0.044089	-0.0525899
x2_hydroxybutyrate_p	acidilobus	0.0277116	-0.0747768	-0.0431285	-0.176287
x2_hydroxybutyrate_p	acidimicrobium	-0.0174596	-0.018566	0.0128233	-0.0699171
x2_hydroxybutyrate_p	acidiphilium	-0.0699205	-0.159926	-0.0230051	-0.0330507
x2_hydroxybutyrate_p	acidipropionibacterium	0.0215205	-0.134188	0.0547031	-0.00922345
x2_hydroxybutyrate_p	acidithiobacillus	0.0119608	-0.0528419	0.0874577	0.0708883
x2_hydroxybutyrate_p	acidobacterium	-0.134618	-0.126926	-0.176884	-0.0938041
x2_hydroxybutyrate_p	acidothermus	0.103312	0.148674	0.0195471	-0.0273402
x2_hydroxybutyrate_p	acidovorax	-0.00954311	-0.0850983	0.121941	0.00120068
x2_hydroxybutyrate_p	aciduliprofundum	-0.100626	-0.211957	-0.136109	-0.10989
x2_hydroxybutyrate_p	acinetobacter	0.138051	-0.0319482	0.0312177	-0.13073
x2_hydroxybutyrate_p	actinoalloteichus	-0.19789	-0.175872	-0.0728574	0.0104702
x2_hydroxybutyrate_p	actinobacillus	-0.0251745	-0.0265367	-0.179574	-0.0735778
x2_hydroxybutyrate_p	actinomyces	0.195748	0.131161	0.181111	-0.000432246
x2_hydroxybutyrate_p	actinoplanes	-0.0408281	-0.138224	0.0370771	0.000624355
x2_hydroxybutyrate_p	actinopolymorpha	-0.188938	-0.192652	-0.136397	-0.135735
x2_hydroxybutyrate_p	actinopolyspora	-0.0404431	-0.160373	0.0243018	0.00467721
x2_hydroxybutyrate_p	actinosynnema	-0.0883655	-0.198846	-0.0939894	-0.14721
x2_hydroxybutyrate_p	actinotignum	0.0119816	-0.0965766	0.0480273	0.00331388
x2_hydroxybutyrate_p	adlercreutzia	-0.0526815	-0.120258	0.0521576	0.00100857
x2_hydroxybutyrate_p	advenella	-0.173379	-0.175335	-0.170017	-0.0851605
x2_hydroxybutyrate_p	aequorivita	-0.114044	-0.162826	-0.1473	-0.123452
x2_hydroxybutyrate_p	aeribacillus	0.101375	-0.0230055	0.052734	-0.0659911
x2_hydroxybutyrate_p	aerococcus	0.0419604	-0.117939	-0.0213721	-0.0803977
x2_hydroxybutyrate_p	aeromicrobium	-0.0491862	-0.194085	-0.115938	-0.0873136
x2_hydroxybutyrate_p	aeromonas	0.216661	-0.00246349	0.173763	0.00946137
x2_hydroxybutyrate_p	afipia	0.323283	-0.0130247	0.340033	0.242758
x2_hydroxybutyrate_p	agarilytica	-0.167412	-0.18942	-0.0631078	-0.116072
x2_hydroxybutyrate_p	agarivorans	0.0179896	0.145869	-0.104651	-0.0935036
x2_hydroxybutyrate_p	aggregatibacter	-0.0484021	-0.19406	-0.0949019	-0.0811181
x2_hydroxybutyrate_p	agrobacterium	-0.299937	-0.18826	-0.181255	-0.0975434
x2_hydroxybutyrate_p	agrococcus	0.00981723	-0.0650029	0.0785246	0.0150452
x2_hydroxybutyrate_p	agromyces	-0.0372316	-0.189009	-0.0435607	-0.0791009
x2_hydroxybutyrate_p	ahniella	-0.165974	-0.0780242	-0.185433	-0.202653
x2_hydroxybutyrate_p	akkermansia	-0.115936	-0.0637892	-0.149893	-0.112672
x2_hydroxybutyrate_p	alcaligenes	-0.0277382	-0.1135	-0.0296809	-0.0670941
x2_hydroxybutyrate_p	alcanivorax	0.154024	-0.0882207	0.115265	-0.0114305
x2_hydroxybutyrate_p	algibacter	0.176604	-0.0365516	0.169536	0.104889
x2_hydroxybutyrate_p	algoriphagus	0.0045854	-0.0423638	0.0971592	-0.00494681
x2_hydroxybutyrate_p	alicycliphilus	-0.11296	-0.100707	-0.12247	-0.0712242
x2_hydroxybutyrate_p	alicyclobacillus	-0.149761	-0.173628	-0.00821266	-0.0659333
x2_hydroxybutyrate_p	aliivibrio	0.0574867	0.25199	-0.0892347	-0.0529792
x2_hydroxybutyrate_p	alistipes	0.0482767	0.0206361	0.225488	0.181927
x2_hydroxybutyrate_p	alkalilimnicola	0.0764468	-0.0148168	0.0789568	0.0333149
x2_hydroxybutyrate_p	alkaliphilus	0.213756	-0.0189776	0.0709363	0.0339073
x2_hydroxybutyrate_p	alkalitalea	-0.0554871	-0.103544	-0.00509089	-0.121896
x2_hydroxybutyrate_p	alloactinosynnema	-0.209	-0.202885	-0.229186	-0.200423
x2_hydroxybutyrate_p	allochromatium	0.0651193	-0.115121	0.0785246	-0.0292146
x2_hydroxybutyrate_p	allofrancisella	0.079682	-0.0519371	0.0525418	0.0080352
x2_hydroxybutyrate_p	allokutzneria	-0.0857897	-0.194226	0.0121509	-0.05118
x2_hydroxybutyrate_p	altererythrobacter	-0.0935853	-0.132144	0.0874096	0.012391
x2_hydroxybutyrate_p	alteromonas	0.0900167	0.0584496	-0.0328026	0.00273755
x2_hydroxybutyrate_p	aminobacter	-0.252979	-0.149401	-0.181687	-0.1488
x2_hydroxybutyrate_p	aminobacterium	-0.0104339	-0.19664	0.0250222	-0.0824601
x2_hydroxybutyrate_p	aminomonas	-0.113187	0.0239485	0.0403909	0.0435169
x2_hydroxybutyrate_p	ammonifex	0.0530228	-0.0260382	0.0344356	0.0480023
x2_hydroxybutyrate_p	amphibacillus	0.0561999	-0.174235	0.0172898	-0.0568928
x2_hydroxybutyrate_p	amycolatopsis	-0.171819	-0.228768	-0.132795	-0.1412
x2_hydroxybutyrate_p	anabaena	0.12285	-0.0958575	0.137886	0.0675544
x2_hydroxybutyrate_p	anabaenopsis	0.131109	-0.0332886	0.0748265	0.0612744
x2_hydroxybutyrate_p	anaerococcus	0.11427	0.0064894	0.0161372	-0.0667579
x2_hydroxybutyrate_p	anaerolinea	-0.0885873	-0.0891963	0.0247821	-0.0327578
x2_hydroxybutyrate_p	anaeromyxobacter	-0.0878506	-0.148865	-0.0260308	-0.0425522
x2_hydroxybutyrate_p	anaerostipes	-0.249144	-0.231451	-0.237351	-0.197344
x2_hydroxybutyrate_p	anaerotignum	-0.175467	-0.12512	-0.10201	-0.0798694
x2_hydroxybutyrate_p	anaplasma	0.0724591	-0.0171146	0.0232452	-0.0325958
x2_hydroxybutyrate_p	anderseniella	-0.0609254	-0.0744493	-0.0360205	-0.0497802
x2_hydroxybutyrate_p	aneurinibacillus	-0.215667	-0.0825531	-0.164926	-0.12977
x2_hydroxybutyrate_p	anoxybacillus	-0.159606	-0.0867202	-0.115602	-0.146003
x2_hydroxybutyrate_p	antarctobacter	0.0582796	-0.0397904	0.0957664	0.0536516
x2_hydroxybutyrate_p	aquabacterium	0.173753	-0.120169	0.11685	0.0756313
x2_hydroxybutyrate_p	aquaspirillum	-0.138388	-0.183867	-0.160891	-0.115867
x2_hydroxybutyrate_p	aquifex	0.0252564	-0.013289	-0.0603703	-0.0382881
x2_hydroxybutyrate_p	aquiflexum	0.0900437	-0.0430773	0.164926	0.0841215
x2_hydroxybutyrate_p	arachidicoccus	0.0118791	-0.0608607	0.105324	-0.0242081
x2_hydroxybutyrate_p	arcanobacterium	0.0745322	-0.0734433	0.134572	0.0266199
x2_hydroxybutyrate_p	archaeoglobus	-0.0409095	-0.176637	-0.147012	-0.120504
x2_hydroxybutyrate_p	archangium	-0.142089	-0.142617	-0.0456739	-0.0342948
x2_hydroxybutyrate_p	arcobacter	0.124357	-0.0719682	0.109262	0.0664217
x2_hydroxybutyrate_p	arcticibacterium	0.187532	-0.0327767	0.316644	0.162012
x2_hydroxybutyrate_p	arenibacter	0.0120527	-0.0320608	0.0222847	0.00525012
x2_hydroxybutyrate_p	aromatoleum	-0.0117773	-0.0692899	-0.0476431	-0.0356877
x2_hydroxybutyrate_p	arsenicicoccus	-0.0701168	-0.160734	-0.00518695	-0.112631
x2_hydroxybutyrate_p	arsenophonus	0.105457	0.0786756	-0.0134476	-0.0353842
x2_hydroxybutyrate_p	arthrobacter	0.0634455	-0.142254	0.079197	-0.0655572
x2_hydroxybutyrate_p	arthrospira	-3.1761e-05	-0.143526	0.0779483	-0.0373181
x2_hydroxybutyrate_p	asaia	-0.188806	-0.299869	-0.179718	-0.214817
x2_hydroxybutyrate_p	asticcacaulis	-0.0277051	-0.0875002	-0.0356362	-0.042957
x2_hydroxybutyrate_p	atopobium	0.0782592	-0.00254051	0.0718968	-0.116082
x2_hydroxybutyrate_p	aurantimicrobium	-0.282369	-0.276113	-0.213097	-0.175582
x2_hydroxybutyrate_p	auraticoccus	-0.0213329	-0.103842	0.0447134	-0.0302484
x2_hydroxybutyrate_p	aureimonas	0.0982409	0.0391271	0.0834714	0.0702143
x2_hydroxybutyrate_p	aureitalea	0.0303408	-0.0766605	0.082799	-0.0278634
x2_hydroxybutyrate_p	auricoccus	-0.00175055	0.136626	-0.0936532	-0.134706
x2_hydroxybutyrate_p	azoarcus	0.027891	-0.0972431	0.10859	-0.0313138
x2_hydroxybutyrate_p	azorhizobium	-0.0899389	-0.0681433	-0.0613308	-0.0597266
x2_hydroxybutyrate_p	azospira	-0.147433	-0.137293	-0.113152	-0.0795332
x2_hydroxybutyrate_p	azospirillum	0.00535683	-0.0880692	0.0318901	-0.0255505
x2_hydroxybutyrate_p	azotobacter	0.152348	-0.0793611	0.119012	0.0133039
x2_hydroxybutyrate_p	bacillus	-0.0568507	-0.0792726	-0.0761713	-0.216219
x2_hydroxybutyrate_p	bacterioplanes	-0.127301	-0.226229	-0.0858247	-0.146921
x2_hydroxybutyrate_p	bacteriovorax	-0.246787	-0.162015	-0.356795	-0.270289
x2_hydroxybutyrate_p	bacteroides	-0.0873661	-0.127399	0.0752107	0.0762193
x2_hydroxybutyrate_p	barnesiella	0.00473191	0.0694985	0.230627	0.242538
x2_hydroxybutyrate_p	bartonella	0.218132	0.00563866	0.271066	0.0659415
x2_hydroxybutyrate_p	basfia	0.00168178	0.0245548	-0.171313	-0.117819
x2_hydroxybutyrate_p	basilea	-0.102556	-0.0170575	-0.138751	-0.139637
x2_hydroxybutyrate_p	bdellovibrio	0.238699	-0.0224188	0.328314	0.0860649
x2_hydroxybutyrate_p	beggiatoa	-0.179394	-0.0876851	-0.16118	-0.147191
x2_hydroxybutyrate_p	beijerinckia	-0.0870764	-0.142181	-0.0447134	-0.0908891
x2_hydroxybutyrate_p	belliella	0.0936875	0.0247194	0.170209	0.0949736
x2_hydroxybutyrate_p	bernardetia	-0.0543154	-0.0569286	0.00513892	-0.0673359
x2_hydroxybutyrate_p	beutenbergia	-0.132606	-0.219918	-0.137886	-0.170529
x2_hydroxybutyrate_p	bibersteinia	0.122513	0.141092	0.0290565	0.0655887
x2_hydroxybutyrate_p	bifidobacterium	-0.0431805	0.0129139	-0.197056	-0.177413
x2_hydroxybutyrate_p	blastochloris	-0.0847887	-0.185505	-0.0575847	-0.0724321
x2_hydroxybutyrate_p	blastococcus	0.116843	-0.0144469	0.137502	0.0808009
x2_hydroxybutyrate_p	blastomonas	-0.109846	-0.176089	-0.0468266	-0.0465604
x2_hydroxybutyrate_p	blattabacterium	0.147111	-0.0800576	0.150373	0.040635
x2_hydroxybutyrate_p	blautia	-0.150775	-0.0138856	-0.0696876	-0.14754
x2_hydroxybutyrate_p	bordetella	-0.250223	-0.128145	-0.136926	-0.0466825
x2_hydroxybutyrate_p	borrelia	-0.0820471	-0.165372	-0.0293447	-0.0665194
x2_hydroxybutyrate_p	borreliella	0.125221	0.0182908	0.0380856	0.00906064
x2_hydroxybutyrate_p	bosea	0.276529	-0.0747895	0.252816	0.0703119
x2_hydroxybutyrate_p	brachybacterium	-0.126622	-0.12121	-0.171457	-0.0996566
x2_hydroxybutyrate_p	brachyspira	0.0415696	-0.0827764	-0.0713685	-0.0668059
x2_hydroxybutyrate_p	bradymonas	0.012501	-0.0625709	0.0744423	0.0182027
x2_hydroxybutyrate_p	bradyrhizobium	-0.239547	-0.184739	0.00355402	-0.0771318
x2_hydroxybutyrate_p	brenneria	0.0915981	0.381418	-0.116082	-0.0907235
x2_hydroxybutyrate_p	brevefilum	-0.0462886	-0.116974	-0.0368369	-0.0522293
x2_hydroxybutyrate_p	brevibacillus	-0.0654861	-0.0523684	-0.109742	-0.152679
x2_hydroxybutyrate_p	brevibacterium	-0.0021405	-0.141042	0.045818	-0.00196912
x2_hydroxybutyrate_p	brevirhabdus	-0.0351349	-0.136675	-0.00629157	-0.00891076
x2_hydroxybutyrate_p	brevundimonas	-0.0963397	-0.127309	-0.157193	-0.0614269
x2_hydroxybutyrate_p	brochothrix	-0.228372	-0.132498	-0.268521	-0.254486
x2_hydroxybutyrate_p	brucella	0.0895199	0.0586696	0.126456	0.0504767
x2_hydroxybutyrate_p	buchnera	0.277239	0.10568	0.206517	0.163149
x2_hydroxybutyrate_p	burkholderia	0.0923138	-0.11121	0.0542228	0.0203636
x2_hydroxybutyrate_p	butyrivibrio	-0.270459	-0.0950535	-0.19086	-0.146963
x2_hydroxybutyrate_p	caldanaerobacter	-0.0927086	0.047472	-0.0854886	-0.123142
x2_hydroxybutyrate_p	caldicellulosiruptor	-0.0970401	-0.193732	-0.0988401	-0.0813582
x2_hydroxybutyrate_p	caldilinea	-0.120885	-0.172178	-0.0642605	-0.0669343
x2_hydroxybutyrate_p	caldimicrobium	-0.126813	-0.105015	-0.109694	-0.147137
x2_hydroxybutyrate_p	caldisericum	-0.0420292	-0.145768	-0.0856807	-0.141513
x2_hydroxybutyrate_p	caldisphaera	0.105189	0.0114583	0.0366448	0.0841592
x2_hydroxybutyrate_p	calditerrivibrio	-0.0786077	-0.0711262	-0.120741	-0.15591
x2_hydroxybutyrate_p	caldithrix	0.240855	0.148202	0.300795	0.152307
x2_hydroxybutyrate_p	calothrix	0.0631009	0.0651765	0.0744423	-0.00590736
x2_hydroxybutyrate_p	campylobacter	-0.13803	-0.0784184	-0.131547	-0.18284
x2_hydroxybutyrate_p	candidatus_accumulibacter	0.101396	-0.028541	0.22885	0.145593
x2_hydroxybutyrate_p	candidatus_amoebophilus	0.100103	-0.052202	0.1059	0.0600619
x2_hydroxybutyrate_p	candidatus_aquiluna	-0.244787	-0.206309	-0.304589	-0.290086
x2_hydroxybutyrate_p	candidatus_arthromitus	0.0423671	-0.136925	-0.0383738	-0.0716087
x2_hydroxybutyrate_p	candidatus_atelocyanobacterium	0.180503	0.0867832	0.0842398	0.0696716
x2_hydroxybutyrate_p	candidatus_azobacteroides	-0.0131502	-0.0607421	-0.0342435	-0.0676704
x2_hydroxybutyrate_p	candidatus_babela	0.0490989	-0.0999251	0.0566722	0.021819
x2_hydroxybutyrate_p	candidatus_blochmannia	0.0567486	-0.0333773	-0.000288164	-0.0491437
x2_hydroxybutyrate_p	candidatus_cardinium	0.175941	-0.00366941	0.186826	0.0841464
x2_hydroxybutyrate_p	candidatus_carsonella	0.0896181	-0.0431967	0.00850083	-0.0253661
x2_hydroxybutyrate_p	candidatus_cloacimonas	0.0455693	0.0201018	0.00374613	-0.076322
x2_hydroxybutyrate_p	candidatus_desulfofervidus	-0.0264923	0.0920137	-0.0750666	-0.191459
x2_hydroxybutyrate_p	candidatus_desulforudis	-0.0500082	0.091588	0.114641	-0.0188267
x2_hydroxybutyrate_p	candidatus_doolittlea	0.100702	0.0130709	0.00864491	0.0114352
x2_hydroxybutyrate_p	candidatus_endolissoclinum	0.180923	-0.00302876	0.150133	0.0831862
x2_hydroxybutyrate_p	candidatus_evansia	0.0988196	-0.0595274	0.111231	0.0814371
x2_hydroxybutyrate_p	candidatus_fokinia	0.0368019	-0.00273788	-0.014168	-0.122343
x2_hydroxybutyrate_p	candidatus_fonsibacter	0.264553	0.233284	0.0319381	0.00785434
x2_hydroxybutyrate_p	candidatus_gullanella	0.112617	-0.0399448	0.114161	0.0704548
x2_hydroxybutyrate_p	candidatus_hamiltonella	0.0342722	-0.0741306	0.0381817	-0.0371751
x2_hydroxybutyrate_p	candidatus_hoaglandella	0.0231941	0.0139203	-0.0727613	-0.0838243
x2_hydroxybutyrate_p	candidatus_ishikawaella	0.00602809	-0.036586	-0.0525899	-0.143596
x2_hydroxybutyrate_p	candidatus_izimaplasma	-0.0807981	-0.0440831	-0.141825	-0.137646
x2_hydroxybutyrate_p	candidatus_kinetoplastibacterium	-0.115865	-0.221914	-0.0681987	-0.111384
x2_hydroxybutyrate_p	candidatus_korarchaeum	0.076699	-0.0514252	0.0243498	-0.0585578
x2_hydroxybutyrate_p	candidatus_koribacter	-0.00370951	-0.0776118	0.00893307	-0.0403526
x2_hydroxybutyrate_p	candidatus_kuenenia	0.0118853	0.0253653	-0.0411114	-0.138671
x2_hydroxybutyrate_p	candidatus_methanomethylophilus	0.0231976	0.0747037	-0.0487957	-0.0399228
x2_hydroxybutyrate_p	candidatus_methanoplasma	0.018211	0.00253929	-0.0567682	-0.107568
x2_hydroxybutyrate_p	candidatus_methylopumilus	-0.118483	-0.177563	-0.0927887	-0.142448
x2_hydroxybutyrate_p	candidatus_midichloria	-0.173423	-0.245439	-0.17895	-0.245136
x2_hydroxybutyrate_p	candidatus_mikella	0.147552	0.0579016	0.0366448	0.111357
x2_hydroxybutyrate_p	candidatus_moranella	0.0164736	-0.032016	-0.150469	-0.140263
x2_hydroxybutyrate_p	candidatus_nanopelagicus	0.243519	0.0323322	0.128281	0.124718
x2_hydroxybutyrate_p	candidatus_nasuia	0.0572654	-0.140901	0.00302572	-0.125886
x2_hydroxybutyrate_p	candidatus_nitrosocaldus	0.0571847	0.000778951	-0.0443772	-0.0851715
x2_hydroxybutyrate_p	candidatus_nitrosoglobus	-0.108809	-0.147411	-0.145907	-0.148726
x2_hydroxybutyrate_p	candidatus_nitrosomarinus	0.0353867	-0.141689	-0.00821266	-0.0386874
x2_hydroxybutyrate_p	candidatus_nitrosopelagicus	0.159733	0.038385	0.077516	0.178746
x2_hydroxybutyrate_p	candidatus_nitrosotenuis	0.182428	0.220307	0.154744	0.102368
x2_hydroxybutyrate_p	candidatus_nucleicultrix	-0.0287591	-0.0813914	-0.0611868	-0.0946963
x2_hydroxybutyrate_p	candidatus_paracaedibacter	-0.127065	-0.155806	-0.126936	-0.184494
x2_hydroxybutyrate_p	candidatus_pelagibacter	0.174928	0.178451	0.11344	0.0956726
x2_hydroxybutyrate_p	candidatus_phaeomarinobacter	-0.272971	-0.118981	-0.318373	-0.268749
x2_hydroxybutyrate_p	candidatus_phycorickettsia	0.132257	0.0447423	0.122566	0.0616721
x2_hydroxybutyrate_p	candidatus_phytoplasma	0.0734763	-0.0494187	0.0502365	0.0186116
x2_hydroxybutyrate_p	candidatus_planktophila	-0.196597	-0.166178	-0.160219	-0.24566
x2_hydroxybutyrate_p	candidatus_portiera	0.02349	-0.0920815	-0.0743943	-0.241154
x2_hydroxybutyrate_p	candidatus_profftella	0.322905	0.211259	0.434071	0.281393
x2_hydroxybutyrate_p	candidatus_promineofilum	-0.144535	-0.155649	-0.0691113	-0.0917823
x2_hydroxybutyrate_p	candidatus_protochlamydia	0.0570095	-0.0810104	0.11685	0.101069
x2_hydroxybutyrate_p	candidatus_puniceispirillum	-0.118167	0.0832629	-0.066854	-0.137858
x2_hydroxybutyrate_p	candidatus_riesia	-0.058814	-0.0146288	-0.195087	-0.254402
x2_hydroxybutyrate_p	candidatus_ruthia	-0.247299	-0.242306	-0.171265	-0.222041
x2_hydroxybutyrate_p	candidatus_solibacter	-0.0709596	-0.181712	-0.00509089	-0.0837676
x2_hydroxybutyrate_p	candidatus_sulcia	0.0592997	-0.0893191	-0.0282881	-0.0862411
x2_hydroxybutyrate_p	candidatus_symbiobacter	0.0906204	-0.0706553	0.12732	0.0652706
x2_hydroxybutyrate_p	candidatus_tachikawaea	0.331939	0.293028	0.238167	0.284181
x2_hydroxybutyrate_p	candidatus_thioglobus	-0.0851457	-0.135893	-0.13438	-0.241343
x2_hydroxybutyrate_p	candidatus_tremblaya	0.0403582	-0.13386	0.000288164	-0.142705
x2_hydroxybutyrate_p	candidatus_walczuchella	0.0704644	-0.0353847	0.0465865	-0.00838835
x2_hydroxybutyrate_p	candidatus_xiphinematobacter	0.192232	0.14725	0.202579	0.12958
x2_hydroxybutyrate_p	capnocytophaga	0.0125618	-0.0980044	0.047595	-0.0343395
x2_hydroxybutyrate_p	carboxydocella	-0.161781	-0.0950584	-0.0802536	-0.0313648
x2_hydroxybutyrate_p	carboxydothermus	-0.0587997	-0.0679615	-0.00888505	-0.0778709
x2_hydroxybutyrate_p	carnobacterium	0.16511	-0.0256331	0.1132	0.0446173
x2_hydroxybutyrate_p	castellaniella	0.0839971	0.0497722	0.125447	0.0992117
x2_hydroxybutyrate_p	catenovulum	0.217964	0.409376	0.142737	0.0980145
x2_hydroxybutyrate_p	catenulispora	0.0188119	-0.137031	0.0261268	-0.0167059
x2_hydroxybutyrate_p	caulobacter	-0.0737892	-0.146463	0.0869294	0.035156
x2_hydroxybutyrate_p	cedecea	0.124766	0.208386	0.0168095	-0.0144082
x2_hydroxybutyrate_p	celeribacter	0.176746	-0.0425826	0.194126	0.0807339
x2_hydroxybutyrate_p	cellulomonas	0.227525	-0.0584425	0.140384	0.0353481
x2_hydroxybutyrate_p	cellulophaga	-0.111887	-0.126833	-0.12319	-0.173475
x2_hydroxybutyrate_p	cellulosilyticum	-0.014876	0.0160405	-0.0108542	-0.116322
x2_hydroxybutyrate_p	cellulosimicrobium	0.20037	-0.0871911	0.214154	0.108736
x2_hydroxybutyrate_p	cellvibrio	0.0738983	-0.0428763	0.051101	-0.0362126
x2_hydroxybutyrate_p	chamaesiphon	0.0864887	0.102716	0.138607	0.0808711
x2_hydroxybutyrate_p	chania	0.332043	0.352025	0.272891	0.215183
x2_hydroxybutyrate_p	chelativorans	0.0509423	-0.102897	0.143938	0.0160863
x2_hydroxybutyrate_p	chelatococcus	-0.0578103	-0.1462	-0.000432246	-0.0545162
x2_hydroxybutyrate_p	chitinophaga	-0.106672	-0.0960739	0.0928848	-0.0533583
x2_hydroxybutyrate_p	chlamydia	0.118399	0.0445185	0.0313138	-0.0656533
x2_hydroxybutyrate_p	chloracidobacterium	-0.209586	-0.114696	-0.280095	-0.211005
x2_hydroxybutyrate_p	chlorobaculum	-0.0171915	-0.147052	0.0649809	-0.0115746
x2_hydroxybutyrate_p	chlorobium	-0.00233381	-0.0536582	0.147684	0.0328987
x2_hydroxybutyrate_p	chloroflexus	-0.0316685	-0.0458231	0.0269913	-0.0060115
x2_hydroxybutyrate_p	chloroherpeton	0.0548255	-0.0742877	-0.0282881	-0.00981076
x2_hydroxybutyrate_p	chondrocystis	-0.0436679	-0.204906	-0.00715606	-0.121287
x2_hydroxybutyrate_p	chondromyces	0.154388	-0.0425846	0.216411	0.14169
x2_hydroxybutyrate_p	christensenella	-0.147847	-0.150717	-0.133372	-0.0939414
x2_hydroxybutyrate_p	chromobacterium	-0.178261	-0.17444	0.0381817	-0.0358292
x2_hydroxybutyrate_p	chromohalobacter	0.0782045	-0.142611	0.0988401	0.0632191
x2_hydroxybutyrate_p	chroococcidiopsis	0.0583837	-0.112347	0.0726172	0.0365054
x2_hydroxybutyrate_p	chryseobacterium	-0.00632756	-0.0364603	0.0779483	0.000720409
x2_hydroxybutyrate_p	chthonomonas	-0.142039	0.0238796	-0.0964868	-0.16733
x2_hydroxybutyrate_p	citrobacter	0.11062	0.553545	-0.0854886	-0.089859
x2_hydroxybutyrate_p	citromicrobium	-0.0522674	-0.0257013	-0.0477871	0.00287745
x2_hydroxybutyrate_p	clavibacter	-0.139454	-0.187387	-0.0764594	-0.0779261
x2_hydroxybutyrate_p	cloacibacillus	-0.10332	-0.081946	0.0101818	-0.0139279
x2_hydroxybutyrate_p	clostridioides	0.0912735	-0.128369	-0.0393343	-0.0883222
x2_hydroxybutyrate_p	clostridium	0.116702	0.0649403	-0.0244459	-0.0660855
x2_hydroxybutyrate_p	cnuibacter	-0.175762	-0.208952	-0.1692	-0.161766
x2_hydroxybutyrate_p	cobetia	-0.0582584	0.102357	-0.156473	-0.0803451
x2_hydroxybutyrate_p	cohaesibacter	-0.12378	-0.0825573	-0.0958625	-0.0716431
x2_hydroxybutyrate_p	collimonas	0.162376	-0.0335324	0.195087	0.0560959
x2_hydroxybutyrate_p	collinsella	-0.211159	-0.157194	-0.22813	-0.217516
x2_hydroxybutyrate_p	colwellia	0.151819	0.102067	0.0834234	0.0190668
x2_hydroxybutyrate_p	comamonas	-0.122658	-0.111576	-0.0431765	0.00979757
x2_hydroxybutyrate_p	conexibacter	-0.133655	-0.203533	-0.150373	-0.105372
x2_hydroxybutyrate_p	confluentimicrobium	-0.0705337	-0.0703255	-0.105084	-0.0783924
x2_hydroxybutyrate_p	congregibacter	0.0178777	-0.0309357	0.0288164	-0.00815983
x2_hydroxybutyrate_p	coprothermobacter	-0.0673442	-0.164797	-0.0274236	-0.086171
x2_hydroxybutyrate_p	coraliomargarita	-0.0888227	-0.11127	-0.0255985	-0.0223034
x2_hydroxybutyrate_p	corallococcus	-0.0889345	-0.168534	-0.0315059	-0.0243615
x2_hydroxybutyrate_p	coriobacterium	-0.312497	-0.130024	-0.330812	-0.202944
x2_hydroxybutyrate_p	corynebacterium	-0.244128	-0.185691	-0.206661	-0.0904834
x2_hydroxybutyrate_p	coxiella	0.157926	0.102655	0.0260308	-0.000889171
x2_hydroxybutyrate_p	crinalium	-0.082588	-0.13904	0.0119108	-0.12325
x2_hydroxybutyrate_p	croceibacter	0.0755933	-0.0811994	0.0869774	-0.00785907
x2_hydroxybutyrate_p	croceicoccus	-0.118146	-0.178418	-0.0220925	-0.0284349
x2_hydroxybutyrate_p	cronobacter	0.113121	0.202638	0.0437529	0.0451456
x2_hydroxybutyrate_p	cryobacterium	0.00200827	-0.152356	-0.019355	-0.0396715
x2_hydroxybutyrate_p	cryptobacterium	-0.214759	-0.162913	-0.301707	-0.169813
x2_hydroxybutyrate_p	cuniculiplasma	0.034951	-0.0809959	-0.0637802	-0.0967149
x2_hydroxybutyrate_p	cupriavidus	-0.206212	-0.153744	-0.0214682	-0.0268472
x2_hydroxybutyrate_p	curtobacterium	0.0605358	-0.146849	0.146579	0.0116229
x2_hydroxybutyrate_p	curvibacter	-0.261276	-0.247609	-0.254641	-0.217675
x2_hydroxybutyrate_p	cutibacterium	-0.0151009	-0.155498	-0.0443772	-0.0856326
x2_hydroxybutyrate_p	cyanobacterium	0.270774	0.240228	0.211272	0.108248
x2_hydroxybutyrate_p	cyanobium	-0.103016	-0.104029	0.0690152	0.00129677
x2_hydroxybutyrate_p	cyanothece	-0.172913	-0.0980288	-0.189612	-0.167807
x2_hydroxybutyrate_p	cyclobacterium	0.132152	-0.0588354	0.146291	0.0366483
x2_hydroxybutyrate_p	cycloclasticus	0.171174	0.050948	0.215162	0.190633
x2_hydroxybutyrate_p	cylindrospermum	-0.103351	-0.249831	-0.110223	-0.158942
x2_hydroxybutyrate_p	cystobacter	0.0870203	-0.082987	0.12756	0.0434772
x2_hydroxybutyrate_p	cytophaga	0.0799156	0.042231	0.0875057	0.0373688
x2_hydroxybutyrate_p	dactylococcopsis	-0.0518592	-0.000687423	-0.0349639	-0.0667271
x2_hydroxybutyrate_p	dechloromonas	0.0298148	-0.0820282	0.0302092	-0.016241
x2_hydroxybutyrate_p	deferribacter	0.0662804	-0.0125062	0.0257426	-0.0178328
x2_hydroxybutyrate_p	defluviimonas	-0.124685	-0.235134	-0.0312658	-0.096545
x2_hydroxybutyrate_p	defluviitoga	0.0647592	0.0255279	0.033379	-0.0393896
x2_hydroxybutyrate_p	dehalobacter	-0.130021	-0.0611919	-0.0117187	-0.00874096
x2_hydroxybutyrate_p	dehalobacterium	-0.103768	-0.145102	-0.0945657	-0.0927407
x2_hydroxybutyrate_p	dehalococcoides	0.0993014	0.0373145	0.038758	0.0208919
x2_hydroxybutyrate_p	dehalogenimonas	-0.363013	-0.243525	-0.335134	-0.19221
x2_hydroxybutyrate_p	deinococcus	-0.155948	-0.164521	0.0466345	-0.0329467
x2_hydroxybutyrate_p	delftia	-0.167414	-0.117085	-0.0982638	-0.0176277
x2_hydroxybutyrate_p	denitrobacterium	-0.303627	-0.184641	-0.261268	-0.163897
x2_hydroxybutyrate_p	denitrovibrio	-0.0514248	-0.0367187	-0.0383258	-0.0991123
x2_hydroxybutyrate_p	dermabacter	0.0432648	-0.0182256	-0.0553274	-0.100812
x2_hydroxybutyrate_p	dermacoccus	0.236893	0.0281431	0.22155	0.0770912
x2_hydroxybutyrate_p	dermatophilus	-0.154741	-0.0396971	-0.122758	-0.193171
x2_hydroxybutyrate_p	desulfallas	-0.104487	-0.144447	-0.185097	-0.115172
x2_hydroxybutyrate_p	desulfarculus	-0.185723	-0.191894	-0.0749706	-0.101972
x2_hydroxybutyrate_p	desulfatibacillum	-0.162817	-0.0794171	-0.0234853	-0.0450987
x2_hydroxybutyrate_p	desulfitobacterium	-0.266759	-0.198084	-0.400451	-0.189948
x2_hydroxybutyrate_p	desulfobacca	-0.119986	-0.170419	-0.166415	-0.118859
x2_hydroxybutyrate_p	desulfobacter	-0.0757753	-0.0173245	-0.0200754	-0.0539125
x2_hydroxybutyrate_p	desulfobacterium	-0.0386967	-0.0177456	0.00681987	-0.0312207
x2_hydroxybutyrate_p	desulfobacula	0.0578257	-0.0644366	0.0208919	-0.0240159
x2_hydroxybutyrate_p	desulfobulbus	-0.192979	-0.162036	-0.179094	-0.120143
x2_hydroxybutyrate_p	desulfocapsa	0.358825	0.381819	0.257138	0.185806
x2_hydroxybutyrate_p	desulfococcus	-0.0825463	-0.0173278	0.000480273	0.00609946
x2_hydroxybutyrate_p	desulfofarcimen	-0.0134918	-0.0415713	-0.0708402	-0.133804
x2_hydroxybutyrate_p	desulfohalobium	0.102919	0.049498	0.144034	0.0843588
x2_hydroxybutyrate_p	desulfomicrobium	-0.270777	0.0571504	-0.194174	-0.0902433
x2_hydroxybutyrate_p	desulfomonile	0.0757058	0.1511	0.0552794	0.0400259
x2_hydroxybutyrate_p	desulfosporosinus	-0.151352	-0.114084	-0.0656533	-0.112432
x2_hydroxybutyrate_p	desulfotalea	0.147302	-0.0974937	0.103787	0.0626821
x2_hydroxybutyrate_p	desulfotomaculum	-0.0945006	-0.0983738	-0.00494681	-0.0308335
x2_hydroxybutyrate_p	desulfovibrio	-0.205352	0.129851	-0.129818	-0.111375
x2_hydroxybutyrate_p	desulfurella	-0.0323949	0.0143482	-0.0839037	-0.0990915
x2_hydroxybutyrate_p	desulfurispirillum	-0.1205	-0.0149028	-0.0765555	-0.0722457
x2_hydroxybutyrate_p	desulfurivibrio	-0.0697723	-0.073646	0.0322743	0.0271965
x2_hydroxybutyrate_p	desulfurobacterium	-0.146204	-0.0734777	-0.166751	-0.226086
x2_hydroxybutyrate_p	desulfurococcus	0.0924783	-0.0313195	0.0240617	0.0132957
x2_hydroxybutyrate_p	desulfuromonas	-0.286356	-0.145112	-0.16627	-0.0737699
x2_hydroxybutyrate_p	devosia	-0.0947333	-0.129433	0.0633	0.0309296
x2_hydroxybutyrate_p	devriesea	-0.0660247	-0.172952	-0.0529261	-0.127877
x2_hydroxybutyrate_p	dialister	0.133162	0.10661	0.0831352	0.0495642
x2_hydroxybutyrate_p	diaphorobacter	0.118584	-0.0339056	0.117667	0.0690716
x2_hydroxybutyrate_p	dichelobacter	0.0335592	-0.113128	0.000912518	-0.037613
x2_hydroxybutyrate_p	dickeya	0.159479	0.364787	0.12756	0.00782845
x2_hydroxybutyrate_p	dictyoglomus	-0.00167796	0.0271317	-0.114113	-0.101828
x2_hydroxybutyrate_p	dietzia	-0.15011	-0.212339	-0.122374	-0.15801
x2_hydroxybutyrate_p	dinoroseobacter	-0.0291768	-0.150839	0.0165214	-0.0399779
x2_hydroxybutyrate_p	dokdonella	-0.245163	-0.157699	-0.206902	-0.0882233
x2_hydroxybutyrate_p	dokdonia	0.106372	-0.0442943	0.0937973	0.022909
x2_hydroxybutyrate_p	dolichospermum	0.00401684	0.0372178	0.00878899	-0.101844
x2_hydroxybutyrate_p	draconibacterium	0.00284935	-0.0706345	0.110319	0.0144562
x2_hydroxybutyrate_p	dyadobacter	0.0586542	-0.0811338	0.117763	-0.0054276
x2_hydroxybutyrate_p	dyella	0.0156562	-0.0280351	-0.00840477	0.036981
x2_hydroxybutyrate_p	echinicola	0.152828	0.0259871	0.221118	0.0942295
x2_hydroxybutyrate_p	ectothiorhodospira	-0.0314646	-0.141358	-0.0323224	-0.0366468
x2_hydroxybutyrate_p	edwardsiella	0.158086	0.405874	-0.0481714	-0.0834714
x2_hydroxybutyrate_p	eggerthella	0.0987525	0.210166	0.151478	0.121413
x2_hydroxybutyrate_p	ehrlichia	0.0822975	-0.0869108	0.0785726	-0.0100186
x2_hydroxybutyrate_p	eikenella	-0.0887769	-0.0924152	-0.0536945	-0.0402662
x2_hydroxybutyrate_p	elizabethkingia	-0.0123081	-0.0423608	-0.0273275	-0.102154
x2_hydroxybutyrate_p	elusimicrobium	-0.0015482	-0.060305	0.0005283	-0.0512971
x2_hydroxybutyrate_p	endomicrobium	-0.210581	-0.106837	-0.224624	-0.170657
x2_hydroxybutyrate_p	endozoicomonas	0.213235	0.0574265	0.22544	0.0824648
x2_hydroxybutyrate_p	ensifer	-0.0310586	-0.0694276	0.0784285	0.0263733
x2_hydroxybutyrate_p	enterobacter	0.038534	0.478425	-0.24566	-0.174963
x2_hydroxybutyrate_p	enterococcus	0.142995	0.52441	-0.0319862	-0.000960546
x2_hydroxybutyrate_p	entomoplasma	0.11089	-0.108288	0.0612828	-0.0306902
x2_hydroxybutyrate_p	epibacterium	-0.0609418	-0.107898	-0.0166655	-0.0817631
x2_hydroxybutyrate_p	ereboglobus	-0.174045	-0.141547	-0.110847	-0.0783753
x2_hydroxybutyrate_p	erwinia	0.00920377	-0.0619698	-0.00129674	-0.137406
x2_hydroxybutyrate_p	erysipelatoclostridium	0.170548	0.201535	0.0955743	0.0905744
x2_hydroxybutyrate_p	erysipelothrix	0.19148	0.110125	0.0643085	-0.0280479
x2_hydroxybutyrate_p	erythrobacter	-0.0944259	-0.176746	-0.0742982	-0.115484
x2_hydroxybutyrate_p	escherichia	0.00655083	-0.067305	-0.0509569	-0.089715
x2_hydroxybutyrate_p	ethanoligenens	-0.362411	-0.218944	-0.271738	-0.146051
x2_hydroxybutyrate_p	eubacterium	-0.192532	-0.159518	-0.104459	-0.101866
x2_hydroxybutyrate_p	euzebya	0.0770304	-0.0684762	0.146339	0.0734888
x2_hydroxybutyrate_p	exiguobacterium	-0.39714	-0.249178	-0.312658	-0.261412
x2_hydroxybutyrate_p	ezakiella	0.223665	-0.0623339	0.216987	0.106861
x2_hydroxybutyrate_p	faecalibacterium	-0.291348	-0.225648	-0.28509	-0.238696
x2_hydroxybutyrate_p	faecalibaculum	-0.189778	-0.171414	-0.231059	-0.169872
x2_hydroxybutyrate_p	faecalitalea	-0.119697	0.104656	-0.103547	-0.0875057
x2_hydroxybutyrate_p	fastidiosipila	0.129069	-0.0727321	0.115362	0.0444733
x2_hydroxybutyrate_p	fermentimonas	0.0489576	0.180794	0.0956703	0.0608506
x2_hydroxybutyrate_p	ferrimonas	0.111692	-0.0226224	0.035252	-0.0384699
x2_hydroxybutyrate_p	ferroglobus	0.134602	0.0187761	0.0856326	0.158387
x2_hydroxybutyrate_p	ferroplasma	0.0545747	0.00180835	0.00340994	-0.0886486
x2_hydroxybutyrate_p	fervidobacterium	0.0100643	-0.0220614	-0.0376534	-0.0928456
x2_hydroxybutyrate_p	fibrella	-0.073231	-0.157857	0.0804937	-0.0252143
x2_hydroxybutyrate_p	fibrobacter	-0.311712	-0.263228	-0.255649	-0.1972
x2_hydroxybutyrate_p	fictibacillus	-0.259246	-0.242602	-0.16214	-0.240425
x2_hydroxybutyrate_p	filifactor	0.0912537	0.183323	-0.110127	-0.0889465
x2_hydroxybutyrate_p	filimonas	-0.0322593	-0.0932508	0.0531182	-0.0328274
x2_hydroxybutyrate_p	filomicrobium	0.165511	0.0100385	0.145186	0.0588942
x2_hydroxybutyrate_p	fimbriimonas	-0.0910485	-0.123787	-0.0483154	-0.0450354
x2_hydroxybutyrate_p	finegoldia	0.195051	-0.0104097	0.0800134	0.0597459
x2_hydroxybutyrate_p	fischerella	-0.111935	-0.156935	-0.124102	-0.16285
x2_hydroxybutyrate_p	flammeovirga	0.239696	0.0380358	0.177221	0.154483
x2_hydroxybutyrate_p	flavisolibacter	0.014846	-0.0132744	0.121701	0.0246018
x2_hydroxybutyrate_p	flavivirga	0.101558	0.032004	0.140912	0.0526241
x2_hydroxybutyrate_p	flavobacterium	0.0543414	-0.0590393	0.0765555	-0.0329947
x2_hydroxybutyrate_p	flavonifractor	-0.256453	-0.0504963	-0.0745864	-0.0478352
x2_hydroxybutyrate_p	flexistipes	0.216096	0.0258744	0.289989	0.197117
x2_hydroxybutyrate_p	fluoribacter	0.156308	-0.00512286	0.216699	0.136337
x2_hydroxybutyrate_p	fluviicola	-0.0101306	-0.0976875	0.00946137	-0.085897
x2_hydroxybutyrate_p	formosa	0.00422766	-0.11083	0.0174339	-0.00513941
x2_hydroxybutyrate_p	francisella	0.0370445	-0.130346	-0.0142641	-0.0769397
x2_hydroxybutyrate_p	frankia	-0.203455	-0.143181	-0.0998007	-0.066902
x2_hydroxybutyrate_p	frateuria	0.0132181	-0.0393783	0.0204116	-0.0233178
x2_hydroxybutyrate_p	friedmanniella	-0.0481647	-0.227297	0.0119108	-0.0363121
x2_hydroxybutyrate_p	frischella	0.17042	0.0772907	0.0448095	0.0255517
x2_hydroxybutyrate_p	frondihabitans	-0.113595	-0.163222	-0.143986	-0.111265
x2_hydroxybutyrate_p	fuerstia	-0.0741551	-0.154762	-0.0602262	-0.112719
x2_hydroxybutyrate_p	fusobacterium	0.0494951	-0.0692121	0.0604183	-0.000816464
x2_hydroxybutyrate_p	gallibacterium	0.117094	0.0961908	-0.0413035	-0.0425726
x2_hydroxybutyrate_p	gallionella	0.00434896	0.0749748	0.0373172	0.0511699
x2_hydroxybutyrate_p	gardnerella	0.212715	0.0758623	0.17333	0.147912
x2_hydroxybutyrate_p	geitlerinema	-0.262051	-0.203034	-0.281536	-0.210376
x2_hydroxybutyrate_p	gemella	0.123263	-0.000989823	0.101962	0.005283
x2_hydroxybutyrate_p	geminocystis	-0.116709	-0.110811	-0.149893	-0.215888
x2_hydroxybutyrate_p	gemmata	-0.091239	-0.0865141	-0.0928367	-0.0541002
x2_hydroxybutyrate_p	gemmatimonas	0.133194	-0.100356	0.0715606	-0.0176277
x2_hydroxybutyrate_p	gemmatirosa	-0.158683	-0.209923	-0.115265	-0.0756105
x2_hydroxybutyrate_p	gemmobacter	-0.0599276	-0.109026	-0.0714166	-0.0686875
x2_hydroxybutyrate_p	geoalkalibacter	-0.153084	-0.0669878	-0.0980237	-0.114332
x2_hydroxybutyrate_p	geobacillus	-0.26562	-0.203493	-0.222751	-0.169536
x2_hydroxybutyrate_p	geobacter	-0.150031	-0.0787473	0.198209	0.035204
x2_hydroxybutyrate_p	geodermatophilus	-0.242313	-0.122004	-0.220829	-0.230925
x2_hydroxybutyrate_p	geoglobus	0.181479	0.00160811	0.304829	0.241601
x2_hydroxybutyrate_p	geosporobacter	0.0587117	-0.0470827	-0.0920203	-0.0961026
x2_hydroxybutyrate_p	gibbsiella	0.0988779	0.230921	-0.0621473	-0.106621
x2_hydroxybutyrate_p	gilliamella	0.142805	0.288073	-0.0131114	-0.0445332
x2_hydroxybutyrate_p	gillisia	0.298642	0.137241	0.339073	0.198559
x2_hydroxybutyrate_p	gilvibacter	0.168974	0.00778476	0.22544	0.143303
x2_hydroxybutyrate_p	glaciecola	0.179622	0.137483	0.0635881	0.0069676
x2_hydroxybutyrate_p	glaesserella	0.176192	-0.138458	0.147732	0.103509
x2_hydroxybutyrate_p	gloeobacter	-0.200908	-0.197851	-0.209975	-0.149801
x2_hydroxybutyrate_p	gloeocapsa	0.193098	0.01104	0.169296	0.182087
x2_hydroxybutyrate_p	gloeomargarita	-0.0203618	-0.101732	-0.0495642	-0.11992
x2_hydroxybutyrate_p	gluconacetobacter	0.0345131	-0.080302	0.0723291	0.000241803
x2_hydroxybutyrate_p	gluconobacter	-0.146053	-0.234866	-0.259155	-0.152006
x2_hydroxybutyrate_p	glutamicibacter	-0.467918	-0.255445	-0.507072	-0.344905
x2_hydroxybutyrate_p	gordonia	-0.187844	-0.150933	-0.0877458	-0.095142
x2_hydroxybutyrate_p	gordonibacter	-0.137638	0.0635529	0.0249262	-0.0047547
x2_hydroxybutyrate_p	gottschalkia	0.0631381	-0.0276205	-0.0443772	-0.0962467
x2_hydroxybutyrate_p	gramella	0.0301947	-0.102988	0.0279519	-0.0411114
x2_hydroxybutyrate_p	granulibacter	-0.0914519	-0.160816	-0.0452897	-0.0790719
x2_hydroxybutyrate_p	granulicella	-0.206325	-0.228393	-0.202915	-0.116949
x2_hydroxybutyrate_p	granulosicoccus	-0.0958066	-0.235229	-0.158826	-0.161852
x2_hydroxybutyrate_p	grimontia	-0.0832576	0.0508503	-0.159547	-0.0982662
x2_hydroxybutyrate_p	gynuella	0.0492165	-0.104214	0.0367409	-0.0389808
x2_hydroxybutyrate_p	haematospirillum	-0.0242363	-0.0908963	0.0220445	-0.0113183
x2_hydroxybutyrate_p	haemophilus	-0.155575	-0.169361	-0.118147	-0.156761
x2_hydroxybutyrate_p	hafnia	0.0968736	-0.0381103	0.0591216	0.0238696
x2_hydroxybutyrate_p	hahella	0.0981642	-0.0123033	0.0617631	0.0116362
x2_hydroxybutyrate_p	halalkalicoccus	-0.0920814	-0.184545	-0.177365	-0.12655
x2_hydroxybutyrate_p	halanaeroarchaeum	0.229713	0.119257	0.266119	0.253555
x2_hydroxybutyrate_p	halanaerobium	0.20517	0.101662	0.164301	0.140528
x2_hydroxybutyrate_p	haliangium	-0.143086	-0.116414	-0.114545	-0.0741898
x2_hydroxybutyrate_p	halioglobus	0.158395	0.0956711	0.177365	0.0857308
x2_hydroxybutyrate_p	haliscomenobacter	0.0407012	-0.0581733	0.0688231	-0.000384403
x2_hydroxybutyrate_p	haloarcula	0.128043	0.0117598	0.0723291	0.0771224
x2_hydroxybutyrate_p	halobacillus	-0.147543	-0.251341	-0.0849603	-0.173667
x2_hydroxybutyrate_p	halobacteriovorax	0.129375	0.0690815	0.125159	0.0529946
x2_hydroxybutyrate_p	halobacterium	-0.0134547	-0.160717	0.0163773	-0.0365739
x2_hydroxybutyrate_p	halobacteroides	0.0677394	-0.0267342	0.0670941	-0.0114401
x2_hydroxybutyrate_p	halobiforma	0.0556886	-0.0389178	0.0647408	0.0163967
x2_hydroxybutyrate_p	halocynthiibacter	0.0113233	-0.118042	-0.047547	-0.0710576
x2_hydroxybutyrate_p	halodesulfurarchaeum	0.0181615	-0.0838849	0.147252	0.00954218
x2_hydroxybutyrate_p	haloferax	0.0571492	-0.0409095	0.0909156	0.00904739
x2_hydroxybutyrate_p	halogeometricum	-0.0115972	-0.137314	0.125159	0.04903
x2_hydroxybutyrate_p	halohasta	-0.0414613	-0.0739988	-0.0289124	-0.11078
x2_hydroxybutyrate_p	halomicrobium	-0.10868	-0.0356354	-0.143121	-0.194806
x2_hydroxybutyrate_p	halomicronema	-0.129872	-0.0975455	-0.21084	-0.153648
x2_hydroxybutyrate_p	halomonas	0.00871009	-0.146437	0.0188747	-0.0719449
x2_hydroxybutyrate_p	halopenitus	0.165185	-0.0359872	0.1412	0.152288
x2_hydroxybutyrate_p	halopiger	-0.156718	-0.113496	-0.0908676	-0.13765
x2_hydroxybutyrate_p	haloplanus	0.216125	0.00784266	0.229907	0.197851
x2_hydroxybutyrate_p	haloquadratum	-0.106399	-0.226502	-0.0889465	-0.204532
x2_hydroxybutyrate_p	halorhabdus	-0.164801	-0.135367	-0.103115	-0.158701
x2_hydroxybutyrate_p	halorhodospira	-0.0974232	-0.111453	-0.0797253	-0.118583
x2_hydroxybutyrate_p	halorientalis	-0.185727	-0.138962	-0.152871	-0.18997
x2_hydroxybutyrate_p	halorubrum	-0.125161	-0.162247	-0.0410633	-0.135973
x2_hydroxybutyrate_p	halostagnicola	-0.109014	-0.205351	-0.0874577	-0.0413536
x2_hydroxybutyrate_p	halotalea	0.275613	0.0206983	0.254304	0.164127
x2_hydroxybutyrate_p	haloterrigena	-0.0118901	-0.160759	-0.0449535	-0.0737402
x2_hydroxybutyrate_p	halothece	-0.111752	-0.0758263	-0.189083	-0.215631
x2_hydroxybutyrate_p	halothermothrix	0.00848328	-0.125455	0.0889465	-0.0396743
x2_hydroxybutyrate_p	halothiobacillus	-0.0323456	-0.0192073	-0.0405831	-0.040487
x2_hydroxybutyrate_p	hartmannibacter	-0.03509	-0.167695	-0.00946137	-0.0714166
x2_hydroxybutyrate_p	helicobacter	0.252243	0.159487	0.266503	0.149317
x2_hydroxybutyrate_p	heliobacterium	0.000266683	-0.184537	-0.0149845	-0.108205
x2_hydroxybutyrate_p	herbaspirillum	-0.116139	-0.00512181	-0.104075	-0.0902913
x2_hydroxybutyrate_p	herbinix	-0.204273	-0.105788	-0.141777	-0.161708
x2_hydroxybutyrate_p	herbivorax	0.0512002	0.0685628	0.105468	-0.0279999
x2_hydroxybutyrate_p	herminiimonas	-0.0129325	-0.130819	-0.0944216	-0.125844
x2_hydroxybutyrate_p	hippea	0.0285219	0.00906237	-0.00782845	-0.13634
x2_hydroxybutyrate_p	hirschia	0.0302528	-0.0796367	0.00624355	-0.0596159
x2_hydroxybutyrate_p	histophilus	-0.00917343	-0.0309111	-0.0646927	-0.146387
x2_hydroxybutyrate_p	hoeflea	-0.201047	-0.0869684	-0.182312	-0.0991279
x2_hydroxybutyrate_p	homo	-0.14118	-0.142741	-0.171553	-0.17919
x2_hydroxybutyrate_p	hoyosella	0.220005	0.0626894	0.170881	0.126743
x2_hydroxybutyrate_p	hydrogenobacter	0.114741	-0.0324341	0.12732	0.107388
x2_hydroxybutyrate_p	hydrogenobaculum	-0.196129	-0.188353	-0.169728	-0.156074
x2_hydroxybutyrate_p	hydrogenophaga	-0.140886	-0.131191	-0.00148885	0.0255505
x2_hydroxybutyrate_p	hydrogenovibrio	-0.101177	-0.116265	-0.150469	-0.16165
x2_hydroxybutyrate_p	hydromonas	0.159851	-0.0480904	0.155032	0.137255
x2_hydroxybutyrate_p	hymenobacter	-0.0336516	-0.125596	0.150566	0.0186346
x2_hydroxybutyrate_p	hyperthermus	0.16811	0.0860768	0.115794	0.151958
x2_hydroxybutyrate_p	hyphomicrobium	0.0334439	-0.0613577	0.129674	0.0378455
x2_hydroxybutyrate_p	hyphomonas	-0.0317496	-0.111817	-0.051005	-0.0560052
x2_hydroxybutyrate_p	ichthyobacterium	0.0335152	-0.0741989	-0.0276637	-0.073598
x2_hydroxybutyrate_p	idiomarina	0.0297317	-0.105741	-0.0338112	-0.109358
x2_hydroxybutyrate_p	ignavibacterium	-0.134802	-0.0976798	-0.179286	-0.120265
x2_hydroxybutyrate_p	ignicoccus	0.0867277	-0.0259621	0.0747785	0.100791
x2_hydroxybutyrate_p	ilyobacter	0.0251992	-0.0812861	-0.00278558	-0.0428403
x2_hydroxybutyrate_p	immundisolibacter	-0.152832	-0.193843	-0.107101	-0.0852543
x2_hydroxybutyrate_p	intestinimonas	-0.121785	-0.0548703	-0.0294888	-0.0294407
x2_hydroxybutyrate_p	intrasporangium	-0.026059	-0.0850231	0.000864491	-0.0188776
x2_hydroxybutyrate_p	isoptericola	-0.0638379	-0.209124	-0.0499964	-0.126106
x2_hydroxybutyrate_p	isosphaera	0.157248	0.0380457	0.135197	0.134326
x2_hydroxybutyrate_p	janibacter	0.0204407	-0.0103644	-0.0294407	-0.0945748
x2_hydroxybutyrate_p	jannaschia	-0.168289	-0.174721	-0.0910597	-0.127458
x2_hydroxybutyrate_p	janthinobacterium	0.206226	-0.030383	0.18284	0.0986961
x2_hydroxybutyrate_p	jatrophihabitans	0.0193291	-0.111822	0.0346757	-0.0295243
x2_hydroxybutyrate_p	jeongeupia	0.103077	-0.0424928	0.0443772	0.0381177
x2_hydroxybutyrate_p	jeotgalibaca	0.0577306	-0.0538503	0.0255025	-0.0428403
x2_hydroxybutyrate_p	jeotgalibacillus	0.0188444	-0.0266865	0.10835	-0.0384218
x2_hydroxybutyrate_p	jeotgalicoccus	-0.0489716	0.0275731	0.014072	-0.0657509
x2_hydroxybutyrate_p	jiangella	-0.0285741	-0.132132	-0.0732416	-0.0735676
x2_hydroxybutyrate_p	jonesia	0.177392	0.199601	-0.0102778	0.081918
x2_hydroxybutyrate_p	jonquetella	-0.14289	-0.120231	-0.0647408	-0.0480765
x2_hydroxybutyrate_p	kangiella	0.0859027	0.0439992	0.0516774	0.031698
x2_hydroxybutyrate_p	ketobacter	0.0426928	-0.0543815	0.04577	-0.0309444
x2_hydroxybutyrate_p	ketogulonicigenium	-0.325982	-0.246032	-0.27779	-0.251538
x2_hydroxybutyrate_p	kibdelosporangium	-0.140352	-0.0890106	-0.197344	-0.175447
x2_hydroxybutyrate_p	kineococcus	0.021453	-0.0969018	0.0873616	-0.00803136
x2_hydroxybutyrate_p	kingella	-0.0766352	-0.182805	-0.029873	-0.0469879
x2_hydroxybutyrate_p	kiritimatiella	-0.0595334	-0.123446	-0.0095094	0.0237975
x2_hydroxybutyrate_p	kitasatospora	0.0235689	-0.114321	0.0110943	-0.00518695
x2_hydroxybutyrate_p	klebsiella	0.0947662	0.263243	-0.00609946	0.00754028
x2_hydroxybutyrate_p	kluyvera	0.136558	0.263208	0.0356362	0.0396759
x2_hydroxybutyrate_p	kocuria	-0.108389	-0.189118	-0.144082	-0.134428
x2_hydroxybutyrate_p	komagataeibacter	-0.273844	-0.130403	-0.0503326	-0.0479793
x2_hydroxybutyrate_p	kosakonia	0.099239	0.292189	0.00624355	-0.0815023
x2_hydroxybutyrate_p	kosmotoga	0.251695	0.0230096	0.142353	0.0983663
x2_hydroxybutyrate_p	kozakia	-0.176438	-0.187075	-0.176644	-0.188021
x2_hydroxybutyrate_p	kribbella	-0.0293112	-0.0618721	-0.0252623	-0.043662
x2_hydroxybutyrate_p	kurthia	-0.143927	-0.097217	-0.294407	-0.275388
x2_hydroxybutyrate_p	kushneria	-0.0165539	-0.0791133	0.120068	-0.00321791
x2_hydroxybutyrate_p	kutzneria	-0.148568	-0.187232	-0.13366	-0.127063
x2_hydroxybutyrate_p	kyrpidia	-0.0810059	-0.102378	-0.0826549	-0.131033
x2_hydroxybutyrate_p	kytococcus	-0.0603288	-0.190236	-0.0788608	-0.0867454
x2_hydroxybutyrate_p	labrenzia	0.146208	-0.0386322	0.181111	0.0536945
x2_hydroxybutyrate_p	laceyella	-0.0435975	0.0543083	-0.0634921	-0.0942295
x2_hydroxybutyrate_p	lachnoclostridium	0.00599732	-0.00110872	0.0201234	-0.0126312
x2_hydroxybutyrate_p	lacimicrobium	0.137148	0.002264	0.0414956	0.00494729
x2_hydroxybutyrate_p	lacinutrix	0.159558	-0.00292137	0.0871215	0.0589097
x2_hydroxybutyrate_p	lactobacillus	0.265717	0.0310584	0.226305	0.107101
x2_hydroxybutyrate_p	lactococcus	0.0734952	-0.0128948	0.01412	-0.00864491
x2_hydroxybutyrate_p	lacunisphaera	-0.0948953	-0.0718481	-0.0578248	-0.0327341
x2_hydroxybutyrate_p	laribacter	-0.212101	-0.160858	-0.141344	-0.070799
x2_hydroxybutyrate_p	lawsonella	-0.189539	-0.18373	-0.153111	-0.194876
x2_hydroxybutyrate_p	lawsonia	-0.00793679	0.111849	-0.0714166	-0.00144151
x2_hydroxybutyrate_p	leadbetterella	0.0779142	-0.0234476	0.0776601	0.0185883
x2_hydroxybutyrate_p	leclercia	0.0665073	0.106964	-0.0836155	-0.0609466
x2_hydroxybutyrate_p	legionella	0.0562244	0.0198525	-0.0452417	-0.0943736
x2_hydroxybutyrate_p	leifsonia	-0.141553	-0.204038	-0.0357803	-0.0658934
x2_hydroxybutyrate_p	leisingera	-0.0972172	-0.108522	-0.00955743	-0.0738389
x2_hydroxybutyrate_p	lelliottia	0.118268	0.0840841	0.0277117	-0.00902913
x2_hydroxybutyrate_p	leminorella	0.16668	0.0340104	0.0416397	0.0839777
x2_hydroxybutyrate_p	lentibacillus	-0.0592017	-0.152906	-0.0326105	-0.0864512
x2_hydroxybutyrate_p	lentzea	0.0690952	-0.128412	0.0934611	0.0361729
x2_hydroxybutyrate_p	leptolyngbya	-0.266012	-0.117568	-0.349062	-0.234438
x2_hydroxybutyrate_p	leptospira	0.0635926	-0.000389514	0.0278558	-0.0133516
x2_hydroxybutyrate_p	leptospirillum	-0.172292	-0.0912553	-0.205413	-0.213728
x2_hydroxybutyrate_p	leptothrix	-0.225304	-0.185708	-0.153015	-0.145077
x2_hydroxybutyrate_p	leptotrichia	0.0492532	-0.0380633	-0.0047547	-0.0507648
x2_hydroxybutyrate_p	leuconostoc	0.123831	0.0481906	0.118243	-0.000336191
x2_hydroxybutyrate_p	libanicoccus	-0.251223	-0.0830359	-0.212088	-0.127464
x2_hydroxybutyrate_p	liberibacter	0.0355858	-0.0551924	0.0184425	-0.0516989
x2_hydroxybutyrate_p	limnobaculum	0.117382	0.201419	-0.0292966	-0.0724732
x2_hydroxybutyrate_p	limnochorda	-0.0771994	-0.108015	-0.0447134	-0.0179425
x2_hydroxybutyrate_p	limnohabitans	0.0523681	-0.058216	0.0321783	0.0116494
x2_hydroxybutyrate_p	listeria	0.0652435	-0.0158299	-0.0196432	-0.0554235
x2_hydroxybutyrate_p	luteibacter	-0.197921	-0.143348	-0.173715	-0.1337
x2_hydroxybutyrate_p	luteimonas	-0.106511	-0.0693407	0.0184905	0.028415
x2_hydroxybutyrate_p	luteipulveratus	-0.0511636	-0.137186	-0.0788608	-0.0626821
x2_hydroxybutyrate_p	luteitalea	-0.133828	-0.209185	-0.161948	-0.104229
x2_hydroxybutyrate_p	lutibacter	0.0686544	-0.0251054	0.0386139	-0.0135437
x2_hydroxybutyrate_p	lysinibacillus	0.0342504	-0.0594327	0.119588	-0.05283
x2_hydroxybutyrate_p	lysobacter	-0.000159863	-0.155145	-0.0111904	-0.0628197
x2_hydroxybutyrate_p	macrococcus	0.202872	0.125516	0.195135	0.0514372
x2_hydroxybutyrate_p	mageeibacillus	-0.318388	-0.162216	-0.185721	-0.171361
x2_hydroxybutyrate_p	magnetococcus	-0.0392628	-0.087663	0.0242538	-0.0574406
x2_hydroxybutyrate_p	magnetospira	-0.188502	-0.213878	-0.191773	-0.107688
x2_hydroxybutyrate_p	magnetospirillum	-0.168308	-0.0891053	0.0376054	0.0100377
x2_hydroxybutyrate_p	mahella	-0.0332236	-0.0899775	-0.0245419	-0.0608025
x2_hydroxybutyrate_p	mannheimia	-0.0882621	-0.126616	-0.170353	-0.182312
x2_hydroxybutyrate_p	maribacter	0.0113875	-0.165799	-0.0095094	-0.145763
x2_hydroxybutyrate_p	maricaulis	-0.0655741	-0.178914	-0.106813	-0.148905
x2_hydroxybutyrate_p	marichromatium	-0.146534	-0.189605	-0.15412	-0.10948
x2_hydroxybutyrate_p	marinilactibacillus	0.09002	0.125586	0.0428403	0.0234429
x2_hydroxybutyrate_p	marinithermus	0.114631	0.00185899	0.120597	0.0331818
x2_hydroxybutyrate_p	marinitoga	0.153447	0.123805	0.170017	0.0245923
x2_hydroxybutyrate_p	marinobacter	0.0770011	-0.115027	0.0779963	0.019403
x2_hydroxybutyrate_p	marinobacterium	-0.266784	-0.17651	-0.257378	-0.130445
x2_hydroxybutyrate_p	marinomonas	0.229482	0.0665147	0.246812	0.188603
x2_hydroxybutyrate_p	marinovum	0.0127687	-0.118401	-0.0654612	-0.0955012
x2_hydroxybutyrate_p	mariprofundus	-0.337962	-0.174266	-0.312465	-0.174999
x2_hydroxybutyrate_p	marivirga	0.115925	-0.0345928	0.146003	0.0700643
x2_hydroxybutyrate_p	marivivens	-0.156419	-0.182488	-0.147924	-0.199329
x2_hydroxybutyrate_p	marmoricola	-0.00757511	-0.16675	-0.0471628	-0.0228632
x2_hydroxybutyrate_p	martelella	-0.0551613	-0.156022	-0.0319381	-0.0623394
x2_hydroxybutyrate_p	massilia	0.0302174	-0.0785216	0.0944697	0.0217564
x2_hydroxybutyrate_p	megamonas	0.0183444	-0.112962	0.121653	0.00273755
x2_hydroxybutyrate_p	megasphaera	-0.0368569	0.139681	-0.0376534	-0.116514
x2_hydroxybutyrate_p	meiothermus	0.0132565	-0.0944734	0.0455779	0.0107152
x2_hydroxybutyrate_p	melaminivora	-0.12073	-0.11814	-0.123094	-0.0870812
x2_hydroxybutyrate_p	melioribacter	-0.0522988	-0.0441346	0.0523017	-0.0163308
x2_hydroxybutyrate_p	melissococcus	0.101013	0.0777316	0.0488918	0.0136641
x2_hydroxybutyrate_p	melittangium	0.0101978	-0.0914517	0.0628197	-0.0170098
x2_hydroxybutyrate_p	mesoplasma	-0.0715455	0.0928936	-0.122181	-0.133996
x2_hydroxybutyrate_p	mesorhizobium	-0.148008	-0.209564	-0.0381337	-0.0729054
x2_hydroxybutyrate_p	mesotoga	0.0328701	0.00846831	0.0964388	0.103452
x2_hydroxybutyrate_p	metallosphaera	0.129067	0.0291015	0.0551833	0.0257838
x2_hydroxybutyrate_p	methanobacterium	0.245343	-0.00766978	0.220397	0.0475481
x2_hydroxybutyrate_p	methanobrevibacter	0.0135438	0.00590503	-0.0592176	-0.0473549
x2_hydroxybutyrate_p	methanocaldococcus	-0.0379101	-0.075284	-0.0645006	-0.0794321
x2_hydroxybutyrate_p	methanocella	0.0183528	-0.0222014	-0.0145042	-0.0448472
x2_hydroxybutyrate_p	methanococcoides	-0.0218982	-0.105026	-0.0116226	-0.0727036
x2_hydroxybutyrate_p	methanococcus	0.201649	-0.0164072	0.202771	0.0896211
x2_hydroxybutyrate_p	methanocorpusculum	0.00305172	0.0156878	0.00744423	-0.0803449
x2_hydroxybutyrate_p	methanoculleus	0.0599916	-0.0903105	0.124823	0.0566722
x2_hydroxybutyrate_p	methanofollis	-0.0109618	-0.0879242	0.107101	0.0394556
x2_hydroxybutyrate_p	methanohalobium	-0.219433	-0.123653	-0.215883	-0.266708
x2_hydroxybutyrate_p	methanohalophilus	0.044284	-0.131633	0.129626	0.0232245
x2_hydroxybutyrate_p	methanolacinia	-0.184038	-0.254117	-0.185577	-0.184236
x2_hydroxybutyrate_p	methanolinea	0.24596	0.258219	0.227313	0.106427
x2_hydroxybutyrate_p	methanolobus	-0.114676	-0.190725	-0.0884182	-0.173606
x2_hydroxybutyrate_p	methanomassiliicoccus	0.0535179	0.0289153	-0.0542228	-0.0235757
x2_hydroxybutyrate_p	methanomethylovorans	0.00717239	0.178008	-0.0655572	-0.152368
x2_hydroxybutyrate_p	methanoplanus	0.131425	0.0422676	0.189852	0.096188
x2_hydroxybutyrate_p	methanopyrus	0.0171412	-0.157213	-0.0562399	-0.0721554
x2_hydroxybutyrate_p	methanoregula	0.0343132	-0.0845748	0.0601302	0.0652567
x2_hydroxybutyrate_p	methanosalsum	0.0693734	-0.090069	0.0988401	-0.0168453
x2_hydroxybutyrate_p	methanosarcina	0.0739875	0.0388402	0.110223	0.0234853
x2_hydroxybutyrate_p	methanosphaera	-0.0759061	-0.14168	-0.110223	-0.143113
x2_hydroxybutyrate_p	methanosphaerula	0.0631995	-0.0905822	0.0436088	-0.00500728
x2_hydroxybutyrate_p	methanospirillum	-0.0341134	-0.0853482	-0.0343875	-0.0968765
x2_hydroxybutyrate_p	methanothermobacter	0.0747025	-0.137754	0.0452417	-0.0745864
x2_hydroxybutyrate_p	methanothermococcus	-0.0896016	-0.161801	-0.107629	-0.197949
x2_hydroxybutyrate_p	methanothermus	0.000822048	-0.115361	0.0170497	0.0282061
x2_hydroxybutyrate_p	methanothrix	-0.129032	-0.160655	-0.119636	-0.0907934
x2_hydroxybutyrate_p	methanotorris	0.113438	-0.0296963	0.00408232	-0.0030829
x2_hydroxybutyrate_p	methylacidiphilum	0.0203069	-0.150977	0.0243979	-0.00292987
x2_hydroxybutyrate_p	methylibium	-0.0829989	-0.089886	-0.104411	-0.0643875
x2_hydroxybutyrate_p	methylobacillus	-0.138197	-0.156258	-0.143842	-0.1161
x2_hydroxybutyrate_p	methylobacterium	0.0461698	-0.165205	0.0424081	-0.00465865
x2_hydroxybutyrate_p	methyloceanibacter	0.0736279	-0.0863848	0.056384	0.0218049
x2_hydroxybutyrate_p	methylocella	0.096121	0.00102504	0.203732	0.104087
x2_hydroxybutyrate_p	methylococcus	0.216744	-0.0928973	0.137502	0.0797633
x2_hydroxybutyrate_p	methylocystis	-0.108275	-0.165505	-0.0673342	-0.0414035
x2_hydroxybutyrate_p	methylomicrobium	0.208804	0.0106126	0.327882	0.145318
x2_hydroxybutyrate_p	methylomonas	-0.0123534	-0.0477099	0.167663	0.0524458
x2_hydroxybutyrate_p	methylophaga	0.119688	-0.00160438	0.153783	0.0532142
x2_hydroxybutyrate_p	methylophilus	0.153272	0.127322	0.0666138	0.0132914
x2_hydroxybutyrate_p	methylorubrum	0.139855	-0.110066	0.184569	0.047499
x2_hydroxybutyrate_p	methylosinus	-0.0292735	-0.138777	-0.000240136	-0.0211962
x2_hydroxybutyrate_p	methylotenera	0.185035	0.0789092	0.219052	0.0943569
x2_hydroxybutyrate_p	methyloversatilis	0.0155545	-0.0717831	0.00571525	0.00076851
x2_hydroxybutyrate_p	methylovorus	0.00210466	0.0290719	0.0363086	0.020316
x2_hydroxybutyrate_p	methylovulum	-0.0666462	-0.0607936	-0.00254545	-0.0590157
x2_hydroxybutyrate_p	micavibrio	0.0620294	-0.0127562	0.0633	0.0381854
x2_hydroxybutyrate_p	microbacterium	0.0201149	-0.164573	0.0701198	-0.0191629
x2_hydroxybutyrate_p	microbulbifer	0.192338	-0.02049	0.274332	0.109598
x2_hydroxybutyrate_p	microcella	-0.151042	-0.23392	-0.0711284	-0.0870999
x2_hydroxybutyrate_p	microchaete	0.173651	0.0876945	0.0518214	0.0806356
x2_hydroxybutyrate_p	micrococcus	0.0263022	-0.0969123	-0.00787647	-0.0237255
x2_hydroxybutyrate_p	microcoleus	0.151037	0.0130291	0.19379	0.0983464
x2_hydroxybutyrate_p	microcystis	0.0224731	-0.136626	0.0638763	-0.0224822
x2_hydroxybutyrate_p	microlunatus	0.125366	-0.109368	0.184233	0.0671265
x2_hydroxybutyrate_p	micromonospora	-0.104489	-0.161119	-0.0779963	-0.0544149
x2_hydroxybutyrate_p	micropruina	0.00157271	-0.108202	0.0843359	0.0449391
x2_hydroxybutyrate_p	microterricola	-0.0823833	-0.0812821	-0.0244459	-0.0280547
x2_hydroxybutyrate_p	microvirga	-0.0492716	-0.0640959	0.119444	0.0595538
x2_hydroxybutyrate_p	microvirgula	0.337418	0.200821	0.231395	0.141594
x2_hydroxybutyrate_p	miniimonas	-0.21406	-0.194994	-0.172466	-0.175678
x2_hydroxybutyrate_p	mitsuaria	0.0583592	-0.0786724	0.0722811	0.021991
x2_hydroxybutyrate_p	mobiluncus	-0.0907686	-0.174613	-0.087986	-0.0595595
x2_hydroxybutyrate_p	modestobacter	-0.15407	-0.155273	-0.185866	-0.111938
x2_hydroxybutyrate_p	mogibacterium	0.165401	-0.0970602	0.119108	-0.0129193
x2_hydroxybutyrate_p	monoglobus	-0.0636929	-0.0122056	-0.00624355	0.014024
x2_hydroxybutyrate_p	moorea	0.0786969	-0.0944395	-0.0443292	-0.00046726
x2_hydroxybutyrate_p	moorella	-0.114149	-0.0782884	0.0470667	-0.000192114
x2_hydroxybutyrate_p	moraxella	0.134397	0.0611514	0.0230051	-0.0398626
x2_hydroxybutyrate_p	mordavella	-0.26163	-0.276232	-0.277694	-0.247244
x2_hydroxybutyrate_p	morganella	0.0724641	0.479122	-0.0199313	-0.0609946
x2_hydroxybutyrate_p	moritella	0.254947	0.31672	0.214682	0.200418
x2_hydroxybutyrate_p	mucilaginibacter	0.0517748	-0.010724	0.17309	0.0358764
x2_hydroxybutyrate_p	mucinivorans	0.0142383	-0.109075	0.116802	0.0107581
x2_hydroxybutyrate_p	murdochiella	-0.0368138	-0.115294	-0.0131595	-0.0376054
x2_hydroxybutyrate_p	muribaculum	0.0466899	0.022262	0.169008	0.087986
x2_hydroxybutyrate_p	muricauda	0.0535469	0.0253598	0.19086	0.128293
x2_hydroxybutyrate_p	mycetocola	0.0511089	-0.0825915	0.0711284	0.0234205
x2_hydroxybutyrate_p	mycobacterium	-0.0372983	-0.188579	0.0591216	-0.0587374
x2_hydroxybutyrate_p	mycobacteroides	0.0573154	-0.0487226	0.130202	0.043993
x2_hydroxybutyrate_p	mycolicibacter	-0.142723	-0.179307	-0.0883702	-0.122741
x2_hydroxybutyrate_p	mycolicibacterium	-0.125053	-0.149974	0.0129674	-0.00259347
x2_hydroxybutyrate_p	mycoplasma	0.224075	-0.0133507	0.166174	0.0783325
x2_hydroxybutyrate_p	myroides	0.00714814	-0.100407	0.0252623	-0.00653171
x2_hydroxybutyrate_p	myxococcus	-0.205419	-0.148413	-0.0327546	-0.0587854
x2_hydroxybutyrate_p	nakamurella	-0.2355	-0.185395	-0.187306	-0.190042
x2_hydroxybutyrate_p	natranaerobius	0.206508	0.179468	0.160843	0.0741319
x2_hydroxybutyrate_p	natrialba	-0.153384	-0.149738	-0.109598	-0.206919
x2_hydroxybutyrate_p	natrinema	0.0801932	-0.0782511	0.0401988	0.0100592
x2_hydroxybutyrate_p	natronobacterium	-0.0509389	-0.137918	-0.0830392	-0.110899
x2_hydroxybutyrate_p	natronococcus	0.105809	-0.065632	0.00701198	-0.0345364
x2_hydroxybutyrate_p	natronomonas	0.193061	0.0355057	0.0836635	0.0489289
x2_hydroxybutyrate_p	nautilia	-0.13809	-0.125599	-0.145715	-0.158505
x2_hydroxybutyrate_p	ndongobacter	0.0115154	0.0943242	-0.0913479	-0.0830412
x2_hydroxybutyrate_p	negativicoccus	0.133606	0.197075	0.136349	0.0594578
x2_hydroxybutyrate_p	neisseria	0.0334063	-0.146608	0.0652691	-0.0817905
x2_hydroxybutyrate_p	neoasaia	-0.289431	-0.123968	-0.370723	-0.280186
x2_hydroxybutyrate_p	neomicrococcus	-0.0118653	-0.0519878	0.0706001	0.0249862
x2_hydroxybutyrate_p	neorhizobium	-0.152583	-0.170123	-0.0652691	-0.0492327
x2_hydroxybutyrate_p	neorickettsia	0.317133	0.0786599	0.255649	0.221693
x2_hydroxybutyrate_p	niabella	-0.194576	-0.153315	-0.0931729	-0.079391
x2_hydroxybutyrate_p	niastella	-0.231994	-0.144666	-0.247581	-0.186831
x2_hydroxybutyrate_p	nitratifractor	-0.238712	-0.13301	-0.16848	-0.12149
x2_hydroxybutyrate_p	nitratireductor	-0.114024	-0.232308	-0.0954782	-0.144998
x2_hydroxybutyrate_p	nitratiruptor	-0.280391	-0.217124	-0.26732	-0.320356
x2_hydroxybutyrate_p	nitrobacter	-0.229139	-0.15363	-0.235574	-0.147746
x2_hydroxybutyrate_p	nitrosococcus	-0.341253	-0.136623	-0.348966	-0.286966
x2_hydroxybutyrate_p	nitrosomonas	0.0833534	-0.0698608	0.110607	0.00883702
x2_hydroxybutyrate_p	nitrosopumilus	0.139034	-0.0185382	0.159355	0.132568
x2_hydroxybutyrate_p	nitrososphaera	-0.160139	-0.284148	-0.205989	-0.257682
x2_hydroxybutyrate_p	nitrosospira	-0.14159	-0.19698	-0.0744903	-0.0999472
x2_hydroxybutyrate_p	nitrospira	-0.0799123	-0.164654	0.0684869	-0.0460101
x2_hydroxybutyrate_p	nitrospirillum	-0.102584	-0.136062	-0.00509089	-0.0519705
x2_hydroxybutyrate_p	niveispirillum	0.207814	-0.0619065	0.226305	0.130262
x2_hydroxybutyrate_p	nocardia	0.0236391	-0.142658	0.148068	-0.00220925
x2_hydroxybutyrate_p	nocardioides	0.00288729	-0.169951	0.0231491	-0.0254545
x2_hydroxybutyrate_p	nocardiopsis	-0.116269	-0.0958136	0.0347237	-0.0200082
x2_hydroxybutyrate_p	nodularia	0.184233	0.0851888	0.148452	0.19487
x2_hydroxybutyrate_p	nonlabens	0.22272	-0.0392494	0.240088	0.0434647
x2_hydroxybutyrate_p	nonomuraea	-0.0854414	-0.156691	-0.0632039	-0.0967843
x2_hydroxybutyrate_p	nostoc	0.00101758	-0.0700619	-0.0672862	-0.174723
x2_hydroxybutyrate_p	novibacillus	-0.203622	0.0371709	-0.269241	-0.246948
x2_hydroxybutyrate_p	novosphingobium	-0.0371869	-0.135003	0.0644046	0.0278078
x2_hydroxybutyrate_p	obesumbacterium	0.19432	0.296477	0.0238215	0.00553664
x2_hydroxybutyrate_p	oblitimonas	0.288288	0.203618	0.242586	0.152574
x2_hydroxybutyrate_p	oceanicoccus	-0.0164806	0.00962768	-0.136878	-0.176095
x2_hydroxybutyrate_p	oceanimonas	0.263958	-0.00123081	0.242154	0.173251
x2_hydroxybutyrate_p	oceanisphaera	0.0594239	0.0840544	-0.0355402	-0.0642914
x2_hydroxybutyrate_p	oceanithermus	-0.194192	-0.199203	-0.0973033	-0.0903
x2_hydroxybutyrate_p	oceanobacillus	0.0862969	-0.142012	0.100905	-0.0144082
x2_hydroxybutyrate_p	ochrobactrum	0.00260454	-0.0990575	-0.0153687	-0.0770358
x2_hydroxybutyrate_p	octadecabacter	-0.156031	-0.0992179	-0.132555	-0.100617
x2_hydroxybutyrate_p	odoribacter	-0.0461847	-0.107647	0.0409673	0.0244939
x2_hydroxybutyrate_p	oenococcus	-0.0395639	-0.0400237	0.0292006	-0.031557
x2_hydroxybutyrate_p	oleiphilus	0.051546	0.04242	-0.00922124	0.023726
x2_hydroxybutyrate_p	oleispira	0.110746	-0.0246126	0.0797253	0.0750096
x2_hydroxybutyrate_p	oligella	-0.234944	-0.101258	-0.229186	-0.256829
x2_hydroxybutyrate_p	oligotropha	0.12511	-0.00581621	-0.00864491	-0.00386712
x2_hydroxybutyrate_p	olleya	0.236761	0.0924172	0.194799	0.171668
x2_hydroxybutyrate_p	olsenella	-0.076913	-0.132262	-0.0595538	-0.0855846
x2_hydroxybutyrate_p	opitutus	-0.0423148	-0.157545	-0.0174339	-0.0206567
x2_hydroxybutyrate_p	orientia	0.295613	0.17879	0.252575	0.130078
x2_hydroxybutyrate_p	ornithobacterium	0.0844806	0.0446327	0.147204	0.128329
x2_hydroxybutyrate_p	orrella	0.0733882	-0.0610504	0.0873616	0.061024
x2_hydroxybutyrate_p	oscillatoria	-0.0667745	0.0266462	-0.0992244	-0.130714
x2_hydroxybutyrate_p	oscillibacter	-0.11462	-0.099295	0.035156	0.00533103
x2_hydroxybutyrate_p	ottowia	0.02546	-0.0484533	0.192013	0.0830652
x2_hydroxybutyrate_p	owenweeksia	-0.278971	-0.134609	-0.221358	-0.192271
x2_hydroxybutyrate_p	oxalobacter	-0.00615831	-0.0234308	0.0283361	0.0109745
x2_hydroxybutyrate_p	paenalcaligenes	0.0622663	0.0104483	0.107581	0.0474528
x2_hydroxybutyrate_p	paenarthrobacter	-0.0616516	-0.208876	-0.0143602	-0.0514403
x2_hydroxybutyrate_p	paenibacillus	-0.279724	-0.102273	-0.112624	-0.10979
x2_hydroxybutyrate_p	paeniclostridium	0.0985451	0.483944	-0.113969	-0.0717047
x2_hydroxybutyrate_p	pajaroellobacter	-0.0573328	-0.163684	-0.1132	-0.104485
x2_hydroxybutyrate_p	palaeococcus	0.181402	0.0522954	0.124102	0.0654503
x2_hydroxybutyrate_p	paludibacter	0.0313535	-0.0284221	0.111856	0.022575
x2_hydroxybutyrate_p	paludisphaera	-0.0156368	-0.189184	0.0339553	-0.0205366
x2_hydroxybutyrate_p	pandoraea	-0.00399697	-0.104305	-0.0469707	-0.0479312
x2_hydroxybutyrate_p	pannonibacter	-0.124064	-0.111304	-0.0573926	-0.062581
x2_hydroxybutyrate_p	pantoea	0.102202	0.373218	-0.158106	-0.146963
x2_hydroxybutyrate_p	parabacteroides	0.0323115	0.0403222	0.122277	0.0918282
x2_hydroxybutyrate_p	paraburkholderia	-0.242299	-0.157965	-0.07036	-0.0397186
x2_hydroxybutyrate_p	parachlamydia	-0.119764	-0.195381	-0.015801	-0.110888
x2_hydroxybutyrate_p	paracoccus	-0.0848699	-0.109999	-0.0318901	-0.0999448
x2_hydroxybutyrate_p	parageobacillus	0.0460871	-0.0211905	0.0558557	-0.0913479
x2_hydroxybutyrate_p	paraglaciecola	0.132735	0.00699313	0.0507648	0.0385063
x2_hydroxybutyrate_p	paraliobacillus	-0.0768408	-0.133379	-0.054607	-0.114188
x2_hydroxybutyrate_p	paraoerskovia	-0.304474	-0.168359	-0.272171	-0.192033
x2_hydroxybutyrate_p	paraphotobacterium	0.0782852	-0.0014652	0.0318421	-0.0046412
x2_hydroxybutyrate_p	pararhodospirillum	0.00318002	-0.0640138	-0.0219965	-0.0500696
x2_hydroxybutyrate_p	parasaccharibacter	0.101514	-0.0408719	0.137118	0.0699344
x2_hydroxybutyrate_p	parascardovia	0.0729561	-0.153579	0.0724732	0.0259853
x2_hydroxybutyrate_p	parvibaculum	0.112017	-0.166679	0.0716087	-0.0442272
x2_hydroxybutyrate_p	parvimonas	0.119897	-0.0384797	0.0998007	-0.0427453
x2_hydroxybutyrate_p	parvularcula	0.0451257	-0.0627228	0.142929	0.0525667
x2_hydroxybutyrate_p	pasteurella	0.104383	-0.0472086	0.114545	0.00730015
x2_hydroxybutyrate_p	paucibacter	0.171493	-0.0332593	0.223279	0.16589
x2_hydroxybutyrate_p	paucimonas	0.0530061	-0.00817118	0.0358284	0.0265468
x2_hydroxybutyrate_p	pectobacterium	0.212591	0.440579	0.0309776	-0.0417837
x2_hydroxybutyrate_p	pediococcus	0.10162	0.0455533	0.0975914	-0.0121509
x2_hydroxybutyrate_p	pedobacter	-0.0441779	-0.0126282	0.115506	0.0379416
x2_hydroxybutyrate_p	pelagibaca	-0.0799135	-0.0282904	-0.0751147	-0.113547
x2_hydroxybutyrate_p	pelagibacterium	-0.00779459	-0.118401	-0.00725212	-0.0484767
x2_hydroxybutyrate_p	pelobacter	-0.0882038	-0.0784991	0.120981	0.00365007
x2_hydroxybutyrate_p	pelodictyon	0.101877	0.0801376	0.159787	0.0473069
x2_hydroxybutyrate_p	pelosinus	0.0275048	-0.0783342	0.0814062	-0.000240136
x2_hydroxybutyrate_p	peptoclostridium	0.0842303	-0.16103	0.163581	0.0248301
x2_hydroxybutyrate_p	peptoniphilus	0.135723	0.0509649	0.130298	0.0310737
x2_hydroxybutyrate_p	persephonella	-0.141401	-0.135291	-0.143842	-0.217519
x2_hydroxybutyrate_p	persicobacter	0.0777211	0.00438293	0.166559	0.1212
x2_hydroxybutyrate_p	petrimonas	-0.142005	-0.18877	-0.0486516	-0.153927
x2_hydroxybutyrate_p	petrotoga	0.235673	0.0100989	0.158394	0.084014
x2_hydroxybutyrate_p	phaeobacter	-0.180708	-0.178027	0.000480273	-0.0649809
x2_hydroxybutyrate_p	phenylobacterium	0.0562741	-0.132407	0.0291045	-0.00809193
x2_hydroxybutyrate_p	phoenicibacter	0.0108339	0.165127	0.00182504	-0.0244939
x2_hydroxybutyrate_p	photobacterium	-0.0324435	0.0481588	-0.276541	-0.190284
x2_hydroxybutyrate_p	photorhabdus	0.124996	0.42457	-0.0153687	0.0350119
x2_hydroxybutyrate_p	phreatobacter	-0.0398028	-0.0652611	-0.0473069	-0.0616006
x2_hydroxybutyrate_p	phycicoccus	-0.0345732	-0.0584303	-0.00744423	-0.10696
x2_hydroxybutyrate_p	phycisphaera	0.0297846	-0.136046	0.100233	0.0414111
x2_hydroxybutyrate_p	phyllobacterium	-0.083488	-0.131749	-0.088082	-0.154469
x2_hydroxybutyrate_p	phytobacter	-0.0226879	0.145928	-0.0645006	-0.100491
x2_hydroxybutyrate_p	picrophilus	0.22625	0.191678	0.13073	0.0929481
x2_hydroxybutyrate_p	pimelobacter	0.0892928	-0.138359	0.0787647	0.0312391
x2_hydroxybutyrate_p	pirellula	-0.198785	-0.190473	-0.127849	-0.157365
x2_hydroxybutyrate_p	piscirickettsia	-0.0225492	-0.0271967	-0.091588	-0.110597
x2_hydroxybutyrate_p	planctomyces	-0.155862	-0.182076	-0.0691113	-0.0766774
x2_hydroxybutyrate_p	planctopirus	0.0221983	-0.103236	0.033427	-0.02707
x2_hydroxybutyrate_p	planktomarina	0.0503772	-0.0948744	0.0976875	0.0338199
x2_hydroxybutyrate_p	planktothrix	0.145548	-0.00682635	0.172322	0.0628048
x2_hydroxybutyrate_p	planococcus	-0.218401	-0.199369	-0.131211	-0.236006
x2_hydroxybutyrate_p	plantactinospora	-0.22465	-0.22156	-0.171073	-0.121371
x2_hydroxybutyrate_p	plantibacter	0.290519	0.128141	0.197536	0.14633
x2_hydroxybutyrate_p	plesiomonas	0.00595908	-0.0271022	-0.207382	-0.159547
x2_hydroxybutyrate_p	pleurocapsa	0.158271	-0.0302888	0.175828	0.0995516
x2_hydroxybutyrate_p	pluralibacter	0.197675	0.337562	0.109838	0.0414475
x2_hydroxybutyrate_p	polaribacter	0.145651	-0.0051782	0.184377	0.0501885
x2_hydroxybutyrate_p	polaromonas	-0.114085	-0.139037	-0.02118	-0.0248781
x2_hydroxybutyrate_p	polymorphum	-0.106522	-0.117285	0.0174819	-0.0178164
x2_hydroxybutyrate_p	polynucleobacter	-0.345423	-0.104874	-0.374421	-0.265255
x2_hydroxybutyrate_p	pontibacter	0.00337813	-0.0896177	0.0691593	-0.0194991
x2_hydroxybutyrate_p	pontimonas	0.0702629	0.018545	-0.0432726	-0.0548428
x2_hydroxybutyrate_p	porphyrobacter	0.0789485	-0.0965543	0.184089	0.0536237
x2_hydroxybutyrate_p	porphyromonas	0.063942	0.372412	0.0452897	-0.0182504
x2_hydroxybutyrate_p	pragia	0.0946139	0.0619624	0.109982	-0.0259853
x2_hydroxybutyrate_p	prauserella	0.00319243	0.0396276	0.000720409	0.0119349
x2_hydroxybutyrate_p	prevotella	-0.0183692	-0.0615805	0.0909156	0.00936532
x2_hydroxybutyrate_p	prochlorococcus	0.182489	0.057273	0.0473069	-0.0391672
x2_hydroxybutyrate_p	propionibacterium	0.146068	-0.062731	0.122518	-0.0174819
x2_hydroxybutyrate_p	propionimicrobium	-0.147171	-0.102681	-0.170929	-0.107944
x2_hydroxybutyrate_p	prosthecochloris	-0.150812	-0.126554	0.0219004	-0.0277124
x2_hydroxybutyrate_p	proteiniphilum	0.0364748	0.0279562	0.172034	0.0900512
x2_hydroxybutyrate_p	proteus	0.0408941	0.169536	-0.144418	-0.21449
x2_hydroxybutyrate_p	providencia	0.160706	0.552195	-0.00888505	-0.102202
x2_hydroxybutyrate_p	pseudanabaena	0.292799	0.393295	0.18356	0.143848
x2_hydroxybutyrate_p	pseudarcicella	0.0578129	0.00348202	0.0590255	0.0478598
x2_hydroxybutyrate_p	pseudarthrobacter	-0.0681705	-0.13428	-0.00413035	-0.0706001
x2_hydroxybutyrate_p	pseudoalteromonas	0.112596	0.344323	-0.0804457	-0.14485
x2_hydroxybutyrate_p	pseudodesulfovibrio	-0.0673896	0.0239426	-0.0143602	-0.04577
x2_hydroxybutyrate_p	pseudogulbenkiania	-0.226107	-0.222259	-0.0842398	-0.063882
x2_hydroxybutyrate_p	pseudohongiella	0.308618	0.0998849	0.238023	0.108264
x2_hydroxybutyrate_p	pseudomonas	0.341619	-0.0787502	0.226689	0.00614749
x2_hydroxybutyrate_p	pseudonocardia	-0.228067	-0.206939	-0.204404	-0.16326
x2_hydroxybutyrate_p	pseudopedobacter	-0.0640541	-0.0688786	-0.0501405	-0.0788128
x2_hydroxybutyrate_p	pseudopropionibacterium	-0.0500597	-0.104354	-0.0644526	-0.13251
x2_hydroxybutyrate_p	pseudorhodoplanes	-0.162165	-0.0968963	-0.125639	-0.0308751
x2_hydroxybutyrate_p	pseudothermotoga	-0.0866159	-0.0761558	-0.152391	-0.181707
x2_hydroxybutyrate_p	pseudovibrio	-0.138571	-0.172235	-0.187499	-0.211965
x2_hydroxybutyrate_p	pseudoxanthomonas	0.0421213	-0.102208	0.0577768	0.0479543
x2_hydroxybutyrate_p	psychrobacter	0.12864	-0.0316129	0.154552	0.0234373
x2_hydroxybutyrate_p	psychroflexus	0.0798898	-0.0627653	0.0846721	-0.0270524
x2_hydroxybutyrate_p	psychromonas	0.131534	-0.0028668	-0.0302572	-0.0412653
x2_hydroxybutyrate_p	pusillimonas	-0.164341	-0.124236	-0.190956	-0.16605
x2_hydroxybutyrate_p	pyrococcus	0.0113323	-0.118608	0.0572485	-0.0134858
x2_hydroxybutyrate_p	pyrodictium	-0.116141	-0.159726	-0.0441851	-0.124737
x2_hydroxybutyrate_p	pyrolobus	0.0706707	-0.0288045	-0.0263189	-0.0769739
x2_hydroxybutyrate_p	rahnella	0.0539959	0.181719	-0.171649	-0.102442
x2_hydroxybutyrate_p	ralstonia	-0.181386	-0.182381	-0.235046	-0.0936532
x2_hydroxybutyrate_p	ramlibacter	-0.189645	-0.225754	-0.166751	-0.139499
x2_hydroxybutyrate_p	raoultella	0.0868753	0.24148	-0.162188	-0.152391
x2_hydroxybutyrate_p	raphidiopsis	-0.135147	0.0267767	-0.117763	-0.156556
x2_hydroxybutyrate_p	rathayibacter	-0.254532	-0.177868	-0.245708	-0.149187
x2_hydroxybutyrate_p	reinekea	0.0872463	-0.042426	0.079197	0.00666878
x2_hydroxybutyrate_p	renibacterium	0.0844825	-0.0113108	0.0851524	0.078667
x2_hydroxybutyrate_p	rhizobacter	0.102709	-0.0986911	0.117667	0.0951259
x2_hydroxybutyrate_p	rhizobium	0.145026	-0.0887845	0.199073	0.0119588
x2_hydroxybutyrate_p	rhizorhabdus	0.028917	-0.0990265	0.0911558	0.0316899
x2_hydroxybutyrate_p	rhodanobacter	-0.00109645	-0.103012	0.0184905	-0.0373432
x2_hydroxybutyrate_p	rhodobaca	-0.0309851	-0.0961019	0.00518695	-0.0183113
x2_hydroxybutyrate_p	rhodobacter	0.10435	-0.101297	0.117187	0.0402469
x2_hydroxybutyrate_p	rhodococcus	-0.0373609	-0.123087	0.0204596	-0.0238215
x2_hydroxybutyrate_p	rhodoferax	-0.145747	-0.155537	0.028144	-0.0285762
x2_hydroxybutyrate_p	rhodoluna	0.0795703	-0.0336412	0.0965829	0.0170033
x2_hydroxybutyrate_p	rhodomicrobium	-0.0012135	-0.129167	-0.00960546	-0.0326043
x2_hydroxybutyrate_p	rhodopirellula	0.046456	-0.0656561	0.0154168	-0.0675332
x2_hydroxybutyrate_p	rhodoplanes	-0.178873	-0.0987089	-0.144418	-0.0739558
x2_hydroxybutyrate_p	rhodopseudomonas	0.0983036	-0.109635	0.0901472	-0.0157533
x2_hydroxybutyrate_p	rhodospirillum	-0.115591	-0.171896	-0.0448575	-0.0788077
x2_hydroxybutyrate_p	rhodothermus	-0.00153088	-0.156756	0.0966789	0.0364047
x2_hydroxybutyrate_p	rhodovulum	-0.304626	-0.210822	-0.307567	-0.187231
x2_hydroxybutyrate_p	rickettsia	0.142984	-0.123809	0.0946137	0.0314609
x2_hydroxybutyrate_p	riemerella	0.184563	0.0487392	0.203636	0.144614
x2_hydroxybutyrate_p	rivularia	-0.316369	-0.293545	-0.21862	-0.302664
x2_hydroxybutyrate_p	robiginitalea	0.0322907	-0.076907	0.0435607	0.0229096
x2_hydroxybutyrate_p	roseateles	-0.144412	-0.116678	-0.132699	-0.0465256
x2_hydroxybutyrate_p	roseburia	-0.151628	-0.110903	-0.131114	-0.0936052
x2_hydroxybutyrate_p	roseibacterium	-0.11797	-0.146032	-0.12295	-0.100328
x2_hydroxybutyrate_p	roseiflexus	-0.0863442	-0.229394	-0.0761713	-0.130013
x2_hydroxybutyrate_p	roseobacter	0.184342	0.0420035	0.214394	0.0914179
x2_hydroxybutyrate_p	roseomonas	-0.00500047	-0.153361	-0.0255985	-0.0547731
x2_hydroxybutyrate_p	roseovarius	0.00913033	-0.112864	0.0209879	-0.0729404
x2_hydroxybutyrate_p	rothia	0.133453	0.191527	0.130058	0.0782845
x2_hydroxybutyrate_p	rouxiella	0.133883	0.174297	-0.0521576	-0.0676224
x2_hydroxybutyrate_p	rubinisphaera	0.105368	0.011761	0.116082	0.0708794
x2_hydroxybutyrate_p	rubrivivax	0.268709	-0.00960945	0.191725	0.103309
x2_hydroxybutyrate_p	rubrobacter	-0.217831	-0.254997	-0.129482	-0.125549
x2_hydroxybutyrate_p	ruegeria	-0.235158	-0.120307	-0.222991	-0.150233
x2_hydroxybutyrate_p	rufibacter	-0.0448704	-0.0201958	0.0842879	-9.60546e-05
x2_hydroxybutyrate_p	ruminiclostridium	0.0406606	-0.0839818	0.0476431	-0.0167615
x2_hydroxybutyrate_p	ruminococcus	-0.22259	-0.187795	-0.177557	-0.143794
x2_hydroxybutyrate_p	rummeliibacillus	-0.0706953	-0.15056	-0.0250702	-0.067821
x2_hydroxybutyrate_p	runella	-0.00121237	-0.0253025	0.208198	0.0720889
x2_hydroxybutyrate_p	saccharomonospora	-0.194325	-0.197983	-0.115698	-0.0972072
x2_hydroxybutyrate_p	saccharophagus	0.192771	0.0786276	0.239272	0.199524
x2_hydroxybutyrate_p	saccharopolyspora	0.132231	0.00152605	0.202723	0.108822
x2_hydroxybutyrate_p	saccharothrix	-0.0562296	-0.19711	-0.0447134	-0.101423
x2_hydroxybutyrate_p	sagittula	-0.0899694	-0.158509	-0.0349639	-0.0108761
x2_hydroxybutyrate_p	salegentibacter	-0.0378336	-0.151694	-0.0677185	-0.129434
x2_hydroxybutyrate_p	salimicrobium	-0.062804	-0.115785	-0.0705521	-0.0559306
x2_hydroxybutyrate_p	salinarchaeum	-0.119591	-0.108621	-0.187787	-0.158223
x2_hydroxybutyrate_p	salinibacter	0.0756004	-0.0456136	0.151526	0.0577667
x2_hydroxybutyrate_p	salinibacterium	-0.0283135	-0.141057	0.0329947	-0.0257723
x2_hydroxybutyrate_p	salinicoccus	0.18048	0.036496	0.16579	0.0702707
x2_hydroxybutyrate_p	salinicola	-0.0988582	-0.143105	-0.0607545	-0.0572295
x2_hydroxybutyrate_p	salinigranum	-0.0888376	-0.180508	-0.0996086	-0.117772
x2_hydroxybutyrate_p	salinimonas	0.0736577	-0.00518798	0.15532	0.0449055
x2_hydroxybutyrate_p	salinisphaera	-0.098573	-0.0134958	-0.126792	-0.0789189
x2_hydroxybutyrate_p	salinispira	0.161778	0.089342	0.28509	0.210167
x2_hydroxybutyrate_p	salinispora	-0.0577626	-0.0966068	-0.0190668	-0.0464574
x2_hydroxybutyrate_p	salinivirga	0.0826307	-0.0127654	0.110991	0.0282908
x2_hydroxybutyrate_p	salipiger	0.191621	-0.103037	0.232548	0.151627
x2_hydroxybutyrate_p	salmonella	0.0969438	0.150693	0.0585933	-0.0373652
x2_hydroxybutyrate_p	sandaracinus	-0.0066431	-0.122304	0.00326586	-0.0111957
x2_hydroxybutyrate_p	sanguibacter	-0.119582	-0.168553	-0.0754989	-0.0974258
x2_hydroxybutyrate_p	saprospira	0.0242764	-0.0266363	0.0772759	-0.00782022
x2_hydroxybutyrate_p	scardovia	-0.186995	-0.126232	-0.188267	-0.157006
x2_hydroxybutyrate_p	scytonema	-0.151863	-0.132713	-0.128761	-0.082759
x2_hydroxybutyrate_p	sebaldella	0.154477	0.104077	0.086353	0.0297769
x2_hydroxybutyrate_p	sedimenticola	-0.265569	-0.194754	-0.238984	-0.157677
x2_hydroxybutyrate_p	sediminicola	0.289055	0.0214991	0.292198	0.121511
x2_hydroxybutyrate_p	sediminispirochaeta	-0.0504593	0.0178077	0.00605144	-0.0553274
x2_hydroxybutyrate_p	segniliparus	-0.000204456	-0.16217	0.095094	-0.00237418
x2_hydroxybutyrate_p	selenomonas	-0.408131	-0.196422	-0.192685	-0.138511
x2_hydroxybutyrate_p	seonamhaeicola	0.0693301	0.0424665	0.0265111	-0.0144757
x2_hydroxybutyrate_p	serinicoccus	0.144568	-0.0311978	0.0327066	0.0226994
x2_hydroxybutyrate_p	serratia	0.183752	0.485768	0.116322	-0.0329467
x2_hydroxybutyrate_p	shewanella	0.233859	0.135205	0.0819345	0.0868333
x2_hydroxybutyrate_p	shigella	0.112171	0.346567	0.012391	-0.0212403
x2_hydroxybutyrate_p	shimwellia	0.185028	0.401991	0.061619	0.0847702
x2_hydroxybutyrate_p	shinella	0.0241638	-0.0527564	0.0477391	0.0591358
x2_hydroxybutyrate_p	siansivirga	0.215458	0.220037	0.173811	0.0773139
x2_hydroxybutyrate_p	sideroxydans	-0.117765	-0.0884522	-0.0260788	-0.0378786
x2_hydroxybutyrate_p	simiduia	-0.27114	-0.232064	-0.337248	-0.243312
x2_hydroxybutyrate_p	simkania	-0.0816897	0.122516	-0.189708	-0.334689
x2_hydroxybutyrate_p	simonsiella	-0.245031	-0.243138	-0.267368	-0.295106
x2_hydroxybutyrate_p	simplicispira	-0.006155	-0.13896	0.0236294	-0.0378293
x2_hydroxybutyrate_p	singulisphaera	-0.040716	-0.124817	-0.0109502	-0.043446
x2_hydroxybutyrate_p	sinomonas	0.0839415	-0.111017	0.095142	0.0656988
x2_hydroxybutyrate_p	sinorhizobium	-0.172892	-0.153419	0.0132555	-0.0392383
x2_hydroxybutyrate_p	slackia	-0.202403	-0.156601	-0.192157	-0.0625795
x2_hydroxybutyrate_p	sneathia	0.0387961	-0.0568862	-0.0248301	-0.0561013
x2_hydroxybutyrate_p	snodgrassella	-0.164745	0.128339	-0.194607	-0.117766
x2_hydroxybutyrate_p	sodalis	0.177567	0.146933	0.125831	-0.0100377
x2_hydroxybutyrate_p	solibacillus	-0.0673483	-0.00611298	-0.061571	-0.143986
x2_hydroxybutyrate_p	solitalea	0.0999504	0.0172407	0.207478	0.116658
x2_hydroxybutyrate_p	sorangium	-0.122085	-0.133798	0.0381817	-0.0234373
x2_hydroxybutyrate_p	sphaerobacter	-0.075131	-0.103662	-0.109934	-0.0900007
x2_hydroxybutyrate_p	sphaerochaeta	-0.271242	-0.202681	-0.200226	-0.114113
x2_hydroxybutyrate_p	sphaerospermopsis	0.131819	-0.0126115	0.122614	0.112789
x2_hydroxybutyrate_p	sphingobacterium	0.196233	-0.036741	0.118723	0.0106621
x2_hydroxybutyrate_p	sphingobium	-0.0856137	-0.109471	0.051005	0.0356362
x2_hydroxybutyrate_p	sphingomonas	-0.0482764	-0.139549	0.0582091	0.0273755
x2_hydroxybutyrate_p	sphingopyxis	-0.218434	-0.175758	-0.133084	-0.100377
x2_hydroxybutyrate_p	sphingorhabdus	0.00321199	-0.109722	0.140336	0.00677185
x2_hydroxybutyrate_p	spiribacter	-0.273288	-0.226023	-0.306798	-0.218626
x2_hydroxybutyrate_p	spirochaeta	0.112083	-0.0758051	0.129722	0.0152246
x2_hydroxybutyrate_p	spiroplasma	0.10801	-0.0151107	-0.0427923	-0.0274716
x2_hydroxybutyrate_p	spirosoma	0.0983748	-0.0758416	0.129626	0.0145042
x2_hydroxybutyrate_p	spongiibacter	0.272318	0.0961941	0.209207	0.120578
x2_hydroxybutyrate_p	spongiibacterium	0.15351	0.0930499	0.223567	0.140237
x2_hydroxybutyrate_p	sporosarcina	-0.0884814	-0.0891	-0.0831352	-0.117187
x2_hydroxybutyrate_p	stackebrandtia	-0.0196278	-0.131061	-0.0506208	-0.076777
x2_hydroxybutyrate_p	stanieria	0.0267818	0.0255077	-0.0183944	-0.0804363
x2_hydroxybutyrate_p	staphylococcus	0.0338096	-0.113839	0.00134476	-0.0591216
x2_hydroxybutyrate_p	staphylothermus	-0.0873544	-0.21821	-0.138991	-0.238519
x2_hydroxybutyrate_p	stappia	0.00255438	-0.0646465	0.0504767	0.0272799
x2_hydroxybutyrate_p	starkeya	-0.0279249	-0.187497	-0.0415916	-0.0516856
x2_hydroxybutyrate_p	stenotrophomonas	0.268826	-0.105793	0.284658	0.00465865
x2_hydroxybutyrate_p	steroidobacter	0.0413862	-0.0326076	0.0730495	0.0372232
x2_hydroxybutyrate_p	stigmatella	-0.0599608	-0.101865	0.000192109	-0.0116762
x2_hydroxybutyrate_p	streptobacillus	0.113082	-0.00931336	0.0449055	0.03612
x2_hydroxybutyrate_p	streptococcus	0.395088	0.500252	0.25637	0.259491
x2_hydroxybutyrate_p	streptomyces	-0.086319	-0.15178	0.0290085	-0.0310737
x2_hydroxybutyrate_p	streptosporangium	-0.0871138	-0.165347	-0.108494	-0.0998007
x2_hydroxybutyrate_p	sulfitobacter	0.237638	0.0520638	0.32697	0.142219
x2_hydroxybutyrate_p	sulfolobus	0.151259	0.0294014	0.00504286	0.05097
x2_hydroxybutyrate_p	sulfuricaulis	-0.0653353	-0.103276	-0.0573446	-0.0158223
x2_hydroxybutyrate_p	sulfuricella	-0.119986	-0.0567143	-0.146723	-0.0670373
x2_hydroxybutyrate_p	sulfuricurvum	0.0945971	-0.028064	0.13414	0.0602171
x2_hydroxybutyrate_p	sulfuriferula	-0.0414706	-0.117512	-0.035204	-0.000144203
x2_hydroxybutyrate_p	sulfurifustis	0.257487	0.0564553	0.275677	0.190452
x2_hydroxybutyrate_p	sulfurihydrogenibium	0.0719272	-0.0401513	0.0638763	-0.0290181
x2_hydroxybutyrate_p	sulfurimonas	0.0950569	-0.111223	0.159306	0.0428894
x2_hydroxybutyrate_p	sulfuritalea	-0.101961	-0.0373512	-0.0248781	-0.0194991
x2_hydroxybutyrate_p	sulfurospirillum	0.0208657	-0.0667777	-0.0156089	-0.109934
x2_hydroxybutyrate_p	sulfurovum	-0.323732	-0.202352	-0.316116	-0.283416
x2_hydroxybutyrate_p	symbiobacterium	-0.137908	-0.135861	-0.0505247	-0.0468517
x2_hydroxybutyrate_p	synechococcus	-0.182234	-0.160511	-0.0678625	-0.0767476
x2_hydroxybutyrate_p	synechocystis	0.0971951	-0.0532685	0.0773719	0.0434772
x2_hydroxybutyrate_p	syntrophobacter	-0.062279	-0.00130747	0.0178661	0.0237981
x2_hydroxybutyrate_p	syntrophobotulus	-0.131657	-0.137143	-0.0787167	-0.0383738
x2_hydroxybutyrate_p	syntrophomonas	-0.0169776	-0.114927	0.0208438	-0.0260333
x2_hydroxybutyrate_p	syntrophothermus	0.140286	0.445397	-0.0615229	-0.043709
x2_hydroxybutyrate_p	syntrophus	-0.0251223	0.0313129	0.0553755	-0.00802133
x2_hydroxybutyrate_p	tamlana	0.0178662	0.0375547	-0.00859688	-0.076668
x2_hydroxybutyrate_p	tannerella	-0.0578686	-0.133624	0.0761713	-0.0916841
x2_hydroxybutyrate_p	tateyamaria	0.279731	0.0350739	0.232356	0.12242
x2_hydroxybutyrate_p	tatlockia	0.319577	0.5248	0.174339	0.402999
x2_hydroxybutyrate_p	tatumella	0.225987	0.556173	0.0450496	-0.021132
x2_hydroxybutyrate_p	taylorella	-0.150894	-0.179777	-0.184665	-0.236207
x2_hydroxybutyrate_p	tenacibaculum	0.0651971	-0.0780917	0.0889465	0.00886125
x2_hydroxybutyrate_p	tepidanaerobacter	-0.00408958	0.0795103	-0.00744423	-0.115169
x2_hydroxybutyrate_p	teredinibacter	-0.199877	-0.127674	-0.227265	-0.203452
x2_hydroxybutyrate_p	terribacillus	-0.26375	-0.085515	-0.205893	-0.154434
x2_hydroxybutyrate_p	terriglobus	-0.234554	-0.187314	-0.0514852	-0.0336191
x2_hydroxybutyrate_p	tessaracoccus	0.018874	-0.198849	0.066854	-0.0695915
x2_hydroxybutyrate_p	tetragenococcus	-0.11068	0.0905367	-0.111231	-0.214255
x2_hydroxybutyrate_p	thalassococcus	0.270234	0.0629488	0.334654	0.207437
x2_hydroxybutyrate_p	thalassolituus	-0.177635	-0.231273	-0.157049	-0.199361
x2_hydroxybutyrate_p	thalassospira	-0.133767	-0.0989461	0.00802056	-0.0517303
x2_hydroxybutyrate_p	thalassotalea	0.301711	0.355995	0.122806	0.116674
x2_hydroxybutyrate_p	thauera	-0.0882907	-0.124862	-0.118723	-0.0646943
x2_hydroxybutyrate_p	thermacetogenium	0.134702	0.124484	0.241769	0.183216
x2_hydroxybutyrate_p	thermaerobacter	-0.109643	-0.0715692	-0.0223327	-0.0160415
x2_hydroxybutyrate_p	thermanaeromonas	-0.0613619	0.0730059	-0.0764114	-0.0327144
x2_hydroxybutyrate_p	thermanaerovibrio	-0.140169	-0.0484697	-0.0519175	-0.0010567
x2_hydroxybutyrate_p	thermincola	-0.235691	-0.126393	-0.170257	-0.122289
x2_hydroxybutyrate_p	thermoanaerobacter	0.0615262	-0.0562209	-0.042312	-0.0762673
x2_hydroxybutyrate_p	thermoanaerobacterium	0.153931	-0.0561275	0.0996086	0.0297769
x2_hydroxybutyrate_p	thermobacillus	-0.298581	-0.197196	-0.14485	-0.120789
x2_hydroxybutyrate_p	thermobaculum	0.0898857	-0.092311	0.0469227	0.075252
x2_hydroxybutyrate_p	thermobifida	0.0557098	-0.101482	0.0883702	0.0187821
x2_hydroxybutyrate_p	thermobispora	0.0819401	-0.0912708	0.0538386	0.0325427
x2_hydroxybutyrate_p	thermococcus	0.159011	-0.140116	0.163197	0.0215642
x2_hydroxybutyrate_p	thermocrinis	-0.0587783	0.00421682	-0.0249262	-0.123059
x2_hydroxybutyrate_p	thermodesulfatator	0.0671823	-0.0754721	-0.000144082	-0.0925912
x2_hydroxybutyrate_p	thermodesulfobacterium	0.0217362	0.0214806	-0.124535	-0.105578
x2_hydroxybutyrate_p	thermodesulfobium	0.237537	-0.055398	0.202483	0.0680108
x2_hydroxybutyrate_p	thermodesulfovibrio	0.144889	0.0841665	0.0584972	-0.039632
x2_hydroxybutyrate_p	thermofilum	0.0431716	-0.0646824	-0.0417357	-0.102549
x2_hydroxybutyrate_p	thermogladius	0.210695	0.300385	0.153111	0.254323
x2_hydroxybutyrate_p	thermogutta	0.085867	-0.0545875	0.102538	0.0318369
x2_hydroxybutyrate_p	thermomicrobium	-0.0631773	-0.0689666	-0.0311217	-0.123609
x2_hydroxybutyrate_p	thermomonospora	-0.125494	-0.128448	-0.0943736	-0.07771
x2_hydroxybutyrate_p	thermoplasma	0.224143	0.0646382	0.225584	0.211899
x2_hydroxybutyrate_p	thermoproteus	0.0976506	-0.0299907	0.0374613	0.0157003
x2_hydroxybutyrate_p	thermosediminibacter	-0.180511	-0.12803	-0.128713	-0.10884
x2_hydroxybutyrate_p	thermosipho	0.0830022	-0.0959902	0.0825589	-0.0036981
x2_hydroxybutyrate_p	thermosphaera	0.101327	0.00338907	0.0325625	0.0742581
x2_hydroxybutyrate_p	thermosulfidibacter	-0.0342238	-0.134953	0.0374133	-0.0318334
x2_hydroxybutyrate_p	thermosynechococcus	0.052714	-0.0764722	0.0806858	0.00300778
x2_hydroxybutyrate_p	thermotoga	0.29564	0.0920783	0.306078	0.0614749
x2_hydroxybutyrate_p	thermovibrio	-0.00437905	-0.132728	0.0578248	0.0131453
x2_hydroxybutyrate_p	thermovirga	0.09661	-0.0411446	0.105132	0.0193537
x2_hydroxybutyrate_p	thermus	-0.120737	-0.0312358	0.0657974	-0.00614749
x2_hydroxybutyrate_p	thioalkalivibrio	-0.232345	-0.207416	-0.202099	-0.115602
x2_hydroxybutyrate_p	thiobacillus	-0.0258494	-0.177588	-0.112048	-0.0904308
x2_hydroxybutyrate_p	thioclava	-0.235979	-0.181503	-0.214826	-0.17862
x2_hydroxybutyrate_p	thiocystis	-0.0196766	-0.132787	0.0751627	0.0426973
x2_hydroxybutyrate_p	thiodictyon	-0.0942156	-0.133965	0.0899071	-0.0208919
x2_hydroxybutyrate_p	thioflavicoccus	0.16302	-0.0990784	0.187739	0.0597714
x2_hydroxybutyrate_p	thiohalobacter	-0.0113267	-0.13834	-0.0413035	-0.0627297
x2_hydroxybutyrate_p	thiolapillus	-0.0221489	-0.0264322	0.0113825	-0.0258449
x2_hydroxybutyrate_p	thiomicrospira	-0.0853849	-0.0607624	-0.0925966	-0.0216414
x2_hydroxybutyrate_p	thiomonas	-0.115363	-0.147109	-0.0833273	-0.0734817
x2_hydroxybutyrate_p	thioploca	-0.111703	-0.0878073	-0.106525	-0.209867
x2_hydroxybutyrate_p	tistrella	-0.168188	-0.139924	-0.131066	-0.0659341
x2_hydroxybutyrate_p	tolumonas	-0.0431158	0.0398681	-0.065221	-0.0733553
x2_hydroxybutyrate_p	treponema	-0.173845	-0.057331	-0.080926	-0.0605624
x2_hydroxybutyrate_p	trichodesmium	0.113627	0.0297872	0.133708	0.0633275
x2_hydroxybutyrate_p	trichormus	-0.232318	-0.198128	-0.227745	-0.287611
x2_hydroxybutyrate_p	tropheryma	-0.0179145	-0.126104	-0.0787647	-0.14216
x2_hydroxybutyrate_p	truepera	0.0399351	-0.0703467	0.123958	0.0729668
x2_hydroxybutyrate_p	trueperella	-0.116982	-0.123908	-0.0803016	-0.0909156
x2_hydroxybutyrate_p	tsukamurella	-0.122387	-0.112751	-0.0188747	-0.0307789
x2_hydroxybutyrate_p	tumebacillus	0.04712	-0.186964	-0.0552794	-0.0941815
x2_hydroxybutyrate_p	turicibacter	-0.0362724	-0.0921094	-0.0384699	-0.112192
x2_hydroxybutyrate_p	turneriella	-0.159657	-0.128541	-0.118243	-0.10897
x2_hydroxybutyrate_p	ureaplasma	-0.0702458	0.0778003	-0.101962	-0.195566
x2_hydroxybutyrate_p	vagococcus	0.138627	0.100047	0.0269913	-0.0348198
x2_hydroxybutyrate_p	variibacter	0.129822	-0.0186138	0.111615	0.075002
x2_hydroxybutyrate_p	variovorax	-0.235843	-0.15116	-0.104844	-0.0535984
x2_hydroxybutyrate_p	veillonella	-0.0992036	-0.183025	-0.0758831	-0.199601
x2_hydroxybutyrate_p	verminephrobacter	0.13255	0.0336264	0.124006	0.0638676
x2_hydroxybutyrate_p	verrucomicrobium	0.115145	-0.0255448	0.096823	0.0151286
x2_hydroxybutyrate_p	verrucosispora	0.0803212	-0.0168362	0.14	0.0510834
x2_hydroxybutyrate_p	vibrio	0.171635	0.156726	-0.0829431	0.0236294
x2_hydroxybutyrate_p	virgibacillus	-0.0780698	0.021303	-0.114113	-0.188891
x2_hydroxybutyrate_p	vitreoscilla	-0.0666445	-0.119103	-0.0677185	0.00321814
x2_hydroxybutyrate_p	vogesella	-0.250665	-0.12423	-0.198161	-0.109176
x2_hydroxybutyrate_p	vulcanisaeta	0.135504	0.0590692	0.065125	0.0364861
x2_hydroxybutyrate_p	vulgatibacter	-0.109905	-0.124476	-0.0597459	-0.038152
x2_hydroxybutyrate_p	waddlia	-0.0238584	-0.0400526	-0.0163293	-0.0327172
x2_hydroxybutyrate_p	weeksella	-0.027067	-0.0802847	-0.0240617	-0.0829408
x2_hydroxybutyrate_p	weissella	0.112021	-0.052017	0.0882261	0.0356362
x2_hydroxybutyrate_p	wenyingzhuangia	0.0248456	-0.0353861	-0.0130154	-0.0620661
x2_hydroxybutyrate_p	wenzhouxiangella	0.106274	-0.0968748	0.0748265	0.0131155
x2_hydroxybutyrate_p	wigglesworthia	0.0872324	-0.0196089	-0.0706481	-0.0636366
x2_hydroxybutyrate_p	winogradskyella	0.157985	-0.0381336	0.168336	0.0521096
x2_hydroxybutyrate_p	woeseia	0.0557676	-0.106057	0.116178	0.123932
x2_hydroxybutyrate_p	wolbachia	-0.155385	-0.188758	-0.137598	-0.12101
x2_hydroxybutyrate_p	wolinella	-0.013847	-0.0971037	0.00432246	-0.066838
x2_hydroxybutyrate_p	xanthobacter	-0.0298977	-0.099128	0.0484115	-0.0203444
x2_hydroxybutyrate_p	xanthomonas	0.0711435	-0.196636	0.056384	-0.0970631
x2_hydroxybutyrate_p	xenorhabdus	0.271496	0.556473	0.0564801	-0.0520135
x2_hydroxybutyrate_p	xylanimonas	0.03278	-0.0482663	-0.044041	-0.091134
x2_hydroxybutyrate_p	xylella	-0.232465	-0.153246	-0.234085	-0.302457
x2_hydroxybutyrate_p	yangia	-0.0595653	-0.163184	-0.0195471	-0.020621
x2_hydroxybutyrate_p	yersinia	0.117504	0.472394	-0.0521576	-0.158922
x2_hydroxybutyrate_p	yoonia	0.040013	-0.0713593	0.125976	0.033523
x2_hydroxybutyrate_p	zea	0.0813058	-0.0665442	-0.0114305	-0.0940602
x2_hydroxybutyrate_p	zhihengliuella	-0.19954	-0.181044	-0.156521	-0.214497
x2_hydroxybutyrate_p	zhongshania	-0.0318358	-0.0325718	-0.106717	-0.105773
x2_hydroxybutyrate_p	zobellella	-0.124834	-0.133601	-0.054559	-0.0224533
x2_hydroxybutyrate_p	zobellia	0.00841828	-0.0957686	0.049276	-0.0210941
x2_hydroxybutyrate_p	zunongwangia	0.194348	0.0988321	0.215306	0.194193
x2_hydroxybutyrate_p	zymomonas	-0.0445653	-0.102082	-0.0478352	-0.0938476
x3_hydroxybutyrate_p	acaryochloris	-0.183378	-0.0687139	-0.132168	-0.114927
x3_hydroxybutyrate_p	acetoanaerobium	-0.0840962	-0.0249205	-0.15378	-0.0739602
x3_hydroxybutyrate_p	acetobacter	-0.123891	0.0844555	-0.101191	-0.018346
x3_hydroxybutyrate_p	acetobacterium	-0.140035	0.0234051	-0.142061	0.00629142
x3_hydroxybutyrate_p	acetohalobium	-0.23696	0.00725456	-0.262415	-0.239698
x3_hydroxybutyrate_p	acetomicrobium	0.271985	0.178125	0.288637	0.234997
x3_hydroxybutyrate_p	acholeplasma	-0.0861057	-0.0414178	-0.167083	-0.109115
x3_hydroxybutyrate_p	achromobacter	0.0692559	0.0132804	0.107915	0.0910575
x3_hydroxybutyrate_p	acidaminococcus	-0.175096	-0.120068	-0.179474	-0.100231
x3_hydroxybutyrate_p	acidianus	-0.103699	-0.133588	-0.0839016	-0.0772866
x3_hydroxybutyrate_p	acidiferrobacter	0.108493	-0.0422477	0.139996	0.126805
x3_hydroxybutyrate_p	acidihalobacter	-0.10804	-0.127547	-0.165066	-0.051388
x3_hydroxybutyrate_p	acidilobus	-0.0105154	-0.0726562	-0.0301124	0.113049
x3_hydroxybutyrate_p	acidimicrobium	-0.00492331	0.32834	-0.0608971	-0.0554769
x3_hydroxybutyrate_p	acidiphilium	-0.0590288	-0.091743	-0.090049	0.030552
x3_hydroxybutyrate_p	acidipropionibacterium	0.308752	0.0543479	0.273173	0.156963
x3_hydroxybutyrate_p	acidithiobacillus	0.155367	0.12559	0.15085	0.135194
x3_hydroxybutyrate_p	acidobacterium	-0.17352	-0.0331453	-0.177601	-0.0448941
x3_hydroxybutyrate_p	acidothermus	-0.0686691	-0.103992	-0.0484584	-0.0297403
x3_hydroxybutyrate_p	acidovorax	0.162589	0.0483075	0.16958	0.0805398
x3_hydroxybutyrate_p	aciduliprofundum	-0.154827	-0.144125	-0.147296	-0.0804281
x3_hydroxybutyrate_p	acinetobacter	0.0586371	0.112182	-0.0142638	0.0708866
x3_hydroxybutyrate_p	actinoalloteichus	-0.171316	-0.175382	-0.122995	0.0298009
x3_hydroxybutyrate_p	actinobacillus	-0.288097	-0.148493	-0.341514	-0.0715109
x3_hydroxybutyrate_p	actinomyces	-0.035462	0.0218175	-0.0541254	-0.0958601
x3_hydroxybutyrate_p	actinoplanes	0.00301764	-0.151437	-0.00292959	0.0135914
x3_hydroxybutyrate_p	actinopolymorpha	0.119962	0.0422004	0.177985	0.114918
x3_hydroxybutyrate_p	actinopolyspora	-0.152515	-0.065963	-0.0778504	-0.0227105
x3_hydroxybutyrate_p	actinosynnema	-0.142318	-0.117955	-0.0592162	-0.0539579
x3_hydroxybutyrate_p	actinotignum	0.056608	0.027651	0.0629142	0.0947075
x3_hydroxybutyrate_p	adlercreutzia	-0.0981501	-0.109196	-0.0781385	-0.0566228
x3_hydroxybutyrate_p	advenella	-0.0835708	0.0429277	-0.0649313	0.0290106
x3_hydroxybutyrate_p	aequorivita	-0.189271	-0.135407	-0.177457	-0.0488603
x3_hydroxybutyrate_p	aeribacillus	0.0537925	0.0253255	0.071703	0.0589055
x3_hydroxybutyrate_p	aerococcus	0.0426234	0.0319566	0.00883681	0.038613
x3_hydroxybutyrate_p	aeromicrobium	-0.0636056	-0.0820018	-0.113534	0.00283354
x3_hydroxybutyrate_p	aeromonas	0.201186	0.0509327	0.243492	0.120546
x3_hydroxybutyrate_p	afipia	0.265554	0.113802	0.251417	0.206002
x3_hydroxybutyrate_p	agarilytica	-0.167293	-0.196495	-0.109788	-0.0551046
x3_hydroxybutyrate_p	agarivorans	-0.0377597	-0.00341837	-0.146144	-0.119481
x3_hydroxybutyrate_p	aggregatibacter	-0.103139	-0.135956	-0.142205	-0.016617
x3_hydroxybutyrate_p	agrobacterium	-0.173526	-0.0507071	-0.0705984	-0.0211315
x3_hydroxybutyrate_p	agrococcus	-0.00740597	-0.0471237	-0.011046	0.0513591
x3_hydroxybutyrate_p	agromyces	0.0132788	-0.11578	-0.0211315	0.011046
x3_hydroxybutyrate_p	ahniella	-0.325484	-0.106441	-0.335414	-0.232858
x3_hydroxybutyrate_p	akkermansia	-0.0844974	0.0470097	-0.082653	-0.0424551
x3_hydroxybutyrate_p	alcaligenes	0.109083	0.0872094	0.137451	0.0600807
x3_hydroxybutyrate_p	alcanivorax	0.0701763	-0.0547595	0.0794352	0.055086
x3_hydroxybutyrate_p	algibacter	0.147225	0.0309813	0.148689	0.198038
x3_hydroxybutyrate_p	algoriphagus	0.11705	-0.0390557	0.176544	0.131159
x3_hydroxybutyrate_p	alicycliphilus	0.0709492	-0.0890887	0.0652675	0.0565548
x3_hydroxybutyrate_p	alicyclobacillus	-0.00506897	-0.0639026	0.0171453	0.0371812
x3_hydroxybutyrate_p	aliivibrio	0.150037	0.467523	0.00619537	0.135062
x3_hydroxybutyrate_p	alistipes	0.129991	-0.0291525	0.250888	0.222121
x3_hydroxybutyrate_p	alkalilimnicola	0.0239799	-0.0649572	-0.0390933	0.0468848
x3_hydroxybutyrate_p	alkaliphilus	-0.042213	-0.105032	-0.105129	-0.0126789
x3_hydroxybutyrate_p	alkalitalea	0.0596498	-0.0863567	0.15085	0.0842879
x3_hydroxybutyrate_p	alloactinosynnema	0.0904783	0.0383205	0.131303	0.0951152
x3_hydroxybutyrate_p	allochromatium	0.0174732	-0.169212	-0.0274229	-0.0570825
x3_hydroxybutyrate_p	allofrancisella	0.0891781	-0.0730333	0.103544	0.150619
x3_hydroxybutyrate_p	allokutzneria	0.127656	0.0247991	0.172846	0.15117
x3_hydroxybutyrate_p	altererythrobacter	0.0935049	0.0925238	0.100231	0.108923
x3_hydroxybutyrate_p	alteromonas	-0.0436501	0.0173414	-0.0583037	-0.0400538
x3_hydroxybutyrate_p	aminobacter	0.0602566	0.0471745	0.115071	0.150862
x3_hydroxybutyrate_p	aminobacterium	-0.152758	-0.119411	-0.122323	-0.102093
x3_hydroxybutyrate_p	aminomonas	0.0680341	0.0754406	0.0591682	0.138569
x3_hydroxybutyrate_p	ammonifex	0.0390749	0.00325035	0.0593123	0.0627042
x3_hydroxybutyrate_p	amphibacillus	-0.136422	-0.105324	-0.163241	-0.103347
x3_hydroxybutyrate_p	amycolatopsis	0.0153755	-0.134241	-0.0184901	0.00163289
x3_hydroxybutyrate_p	anabaena	0.189694	0.155304	0.218855	0.167676
x3_hydroxybutyrate_p	anabaenopsis	0.135621	-0.00742063	0.138796	0.21304
x3_hydroxybutyrate_p	anaerococcus	-0.0444025	0.0819508	-0.181107	-0.0563827
x3_hydroxybutyrate_p	anaerolinea	-0.0175016	0.145172	-0.00177697	0.067147
x3_hydroxybutyrate_p	anaeromyxobacter	0.0397198	-0.0809523	-0.0485544	0.0125828
x3_hydroxybutyrate_p	anaerostipes	-0.246356	-0.185495	-0.267746	-0.184949
x3_hydroxybutyrate_p	anaerotignum	-0.0719586	-0.155917	-0.016473	-0.0119105
x3_hydroxybutyrate_p	anaplasma	0.190712	0.0152143	0.171405	0.173253
x3_hydroxybutyrate_p	anderseniella	-0.0402291	-0.0324853	0.00979733	0.0426677
x3_hydroxybutyrate_p	aneurinibacillus	-0.172769	0.0351183	-0.204447	-0.097493
x3_hydroxybutyrate_p	anoxybacillus	-0.245918	-0.0283669	-0.220632	-0.145471
x3_hydroxybutyrate_p	antarctobacter	-0.079673	0.0918122	-0.051388	-0.0349664
x3_hydroxybutyrate_p	aquabacterium	0.224553	0.00705004	0.255355	0.194359
x3_hydroxybutyrate_p	aquaspirillum	0.0417235	0.104243	0.0345788	0.0285756
x3_hydroxybutyrate_p	aquifex	0.0299935	0.0883229	-0.000480261	0.0446589
x3_hydroxybutyrate_p	aquiflexum	0.0219824	-0.0163825	0.0879839	0.0903515
x3_hydroxybutyrate_p	arachidicoccus	0.20983	0.0104267	0.270099	0.196158
x3_hydroxybutyrate_p	arcanobacterium	0.1717	0.257068	0.152339	0.127378
x3_hydroxybutyrate_p	archaeoglobus	-0.25967	-0.250081	-0.307607	-0.189998
x3_hydroxybutyrate_p	archangium	0.0350571	-0.140634	0.0108059	0.0139769
x3_hydroxybutyrate_p	arcobacter	0.0573972	0.11855	-0.0103256	0.0908654
x3_hydroxybutyrate_p	arcticibacterium	-0.0924397	-0.00706515	0.00922102	-0.0485472
x3_hydroxybutyrate_p	arenibacter	0.130072	0.0422374	0.164586	0.183509
x3_hydroxybutyrate_p	aromatoleum	-0.0869054	-0.117734	-0.108971	-0.0509126
x3_hydroxybutyrate_p	arsenicicoccus	0.0130645	-0.00636148	0.0640188	0.040252
x3_hydroxybutyrate_p	arsenophonus	-0.0243803	0.196185	-0.103064	-0.124741
x3_hydroxybutyrate_p	arthrobacter	0.053512	-0.0119741	0.158486	0.0463452
x3_hydroxybutyrate_p	arthrospira	-0.230668	-0.0854145	-0.25814	-0.219725
x3_hydroxybutyrate_p	asaia	-0.353643	-0.167833	-0.399001	-0.232028
x3_hydroxybutyrate_p	asticcacaulis	0.0620446	0.126053	0.0484584	0.0499712
x3_hydroxybutyrate_p	atopobium	-0.0460533	0.0590394	-0.0693017	-0.0842859
x3_hydroxybutyrate_p	aurantimicrobium	-0.140351	-0.199115	-0.125252	-0.0788538
x3_hydroxybutyrate_p	auraticoccus	-0.242912	-0.214275	-0.14792	-0.071188
x3_hydroxybutyrate_p	aureimonas	-0.0850837	-0.00922375	-0.0860628	0.0214004
x3_hydroxybutyrate_p	aureitalea	0.0355169	0.0145609	0.0523005	0.0451755
x3_hydroxybutyrate_p	auricoccus	-0.25149	0.0359133	-0.29344	-0.244253
x3_hydroxybutyrate_p	azoarcus	0.354733	0.097129	0.340985	0.236817
x3_hydroxybutyrate_p	azorhizobium	-0.0066254	-0.0748553	0.0318893	0.0417067
x3_hydroxybutyrate_p	azospira	0.0521622	-0.127257	0.0644991	0.0414465
x3_hydroxybutyrate_p	azospirillum	0.145711	0.0393169	0.123523	0.0839016
x3_hydroxybutyrate_p	azotobacter	0.268244	0.0661542	0.208529	0.124655
x3_hydroxybutyrate_p	bacillus	-0.195187	0.00612621	-0.176544	-0.150754
x3_hydroxybutyrate_p	bacterioplanes	0.0852679	0.0891444	0.0982134	0.0961336
x3_hydroxybutyrate_p	bacteriovorax	-0.135315	-0.00473462	-0.225146	-0.125502
x3_hydroxybutyrate_p	bacteroides	0.00706726	0.0288427	0.0990299	0.172174
x3_hydroxybutyrate_p	barnesiella	0.034271	0.0953084	0.134473	0.184276
x3_hydroxybutyrate_p	bartonella	0.101456	0.199025	0.138988	0.0373163
x3_hydroxybutyrate_p	basfia	0.0251798	0.0922929	-0.0876477	-0.071257
x3_hydroxybutyrate_p	basilea	-0.140777	-0.134761	-0.120305	-0.120022
x3_hydroxybutyrate_p	bdellovibrio	0.36736	0.237757	0.42652	0.266545
x3_hydroxybutyrate_p	beggiatoa	-0.259529	-0.126419	-0.269331	-0.188908
x3_hydroxybutyrate_p	beijerinckia	-0.0778462	-0.10919	-0.0687734	-0.0431162
x3_hydroxybutyrate_p	belliella	0.170388	0.132989	0.151667	0.143311
x3_hydroxybutyrate_p	bernardetia	0.190553	0.178114	0.213236	0.21425
x3_hydroxybutyrate_p	beutenbergia	-0.239878	-0.218314	-0.274469	-0.163547
x3_hydroxybutyrate_p	bibersteinia	0.0553914	-0.0095691	0.0878398	0.119258
x3_hydroxybutyrate_p	bifidobacterium	-0.00601815	-0.0384388	-0.0817885	-0.0512919
x3_hydroxybutyrate_p	blastochloris	-0.0413732	0.0420477	-0.0249736	0.0258886
x3_hydroxybutyrate_p	blastococcus	0.0897349	0.161575	0.107098	0.0884747
x3_hydroxybutyrate_p	blastomonas	-0.130041	-0.0559653	-0.0681491	-0.010154
x3_hydroxybutyrate_p	blattabacterium	0.252679	0.141301	0.226971	0.165994
x3_hydroxybutyrate_p	blautia	-0.26673	-0.0843906	-0.26789	-0.180002
x3_hydroxybutyrate_p	bordetella	-0.0725608	-0.029311	0.0100375	0.0752089
x3_hydroxybutyrate_p	borrelia	-0.105335	-0.168081	-0.127749	-0.0507648
x3_hydroxybutyrate_p	borreliella	0.190524	0.15579	0.128566	0.140461
x3_hydroxybutyrate_p	bosea	0.269362	-0.041227	0.272596	0.13188
x3_hydroxybutyrate_p	brachybacterium	0.00778363	-0.0177538	-0.0541254	-0.0148881
x3_hydroxybutyrate_p	brachyspira	0.0493839	0.0618462	-0.0725675	0.0356834
x3_hydroxybutyrate_p	bradymonas	0.0260254	-0.053926	0.0828931	0.0445641
x3_hydroxybutyrate_p	bradyrhizobium	-0.0516258	-0.00680285	0.100999	0.0401979
x3_hydroxybutyrate_p	brenneria	-0.304779	0.025059	-0.439967	-0.276102
x3_hydroxybutyrate_p	brevefilum	0.00593825	-0.0348701	0.0547018	0.038494
x3_hydroxybutyrate_p	brevibacillus	-0.373942	-0.0494007	-0.408462	-0.229805
x3_hydroxybutyrate_p	brevibacterium	-0.221499	-0.0203597	-0.0811642	0.00172894
x3_hydroxybutyrate_p	brevirhabdus	-0.0206974	-0.201341	-0.0281913	-0.00592431
x3_hydroxybutyrate_p	brevundimonas	0.184217	0.0135266	0.120642	0.0942753
x3_hydroxybutyrate_p	brochothrix	-0.320513	0.0832777	-0.278167	-0.291565
x3_hydroxybutyrate_p	brucella	0.172406	0.0452116	0.143742	0.124724
x3_hydroxybutyrate_p	buchnera	-0.0206575	0.0119201	-0.084574	0.0132072
x3_hydroxybutyrate_p	burkholderia	0.23317	0.0255654	0.202382	0.134041
x3_hydroxybutyrate_p	butyrivibrio	-0.30739	-0.0612013	-0.315003	-0.175103
x3_hydroxybutyrate_p	caldanaerobacter	-0.0140174	0.218733	-0.111325	-0.0161848
x3_hydroxybutyrate_p	caldicellulosiruptor	-0.123108	-0.0929612	-0.193689	-0.0657478
x3_hydroxybutyrate_p	caldilinea	-0.265989	-0.20448	-0.183892	-0.0796462
x3_hydroxybutyrate_p	caldimicrobium	0.117297	0.0678581	0.0375564	0.0872227
x3_hydroxybutyrate_p	caldisericum	0.0589595	0.0349866	0.0278552	0.0213143
x3_hydroxybutyrate_p	caldisphaera	-0.00846342	-0.0581366	-0.0265584	-0.00495042
x3_hydroxybutyrate_p	calditerrivibrio	-0.327558	-0.133919	-0.317693	-0.279603
x3_hydroxybutyrate_p	caldithrix	0.0321465	0.0295052	0.0987417	0.0222414
x3_hydroxybutyrate_p	calothrix	0.0205509	0.244661	-0.0954759	-0.0457209
x3_hydroxybutyrate_p	campylobacter	-0.245237	-0.152428	-0.209634	-0.168187
x3_hydroxybutyrate_p	candidatus_accumulibacter	0.161577	0.0876292	0.217654	0.21281
x3_hydroxybutyrate_p	candidatus_amoebophilus	0.302123	0.275713	0.329171	0.344654
x3_hydroxybutyrate_p	candidatus_aquiluna	-0.227559	-0.204468	-0.273749	-0.13258
x3_hydroxybutyrate_p	candidatus_arthromitus	-0.101789	-0.026581	-0.171501	-0.058784
x3_hydroxybutyrate_p	candidatus_atelocyanobacterium	-0.185849	-0.114796	-0.322832	-0.194986
x3_hydroxybutyrate_p	candidatus_azobacteroides	0.210009	0.042516	0.207857	0.241908
x3_hydroxybutyrate_p	candidatus_babela	-0.00886826	0.0189489	0.0500432	0.0662256
x3_hydroxybutyrate_p	candidatus_blochmannia	-0.284827	-0.152255	-0.300307	-0.200797
x3_hydroxybutyrate_p	candidatus_cardinium	0.164211	0.0245565	0.231966	0.183846
x3_hydroxybutyrate_p	candidatus_carsonella	-0.0941018	-0.15308	-0.119009	-0.187354
x3_hydroxybutyrate_p	candidatus_cloacimonas	0.0561926	0.139453	0.0714149	0.0182745
x3_hydroxybutyrate_p	candidatus_desulfofervidus	-0.0906196	0.0764044	-0.0862069	-0.108929
x3_hydroxybutyrate_p	candidatus_desulforudis	-0.0338844	0.0427988	0.0178657	0.00206512
x3_hydroxybutyrate_p	candidatus_doolittlea	-0.0775571	-0.0563848	-0.0843819	-0.117251
x3_hydroxybutyrate_p	candidatus_endolissoclinum	0.30019	0.427946	0.208097	0.201944
x3_hydroxybutyrate_p	candidatus_evansia	-0.0179115	-0.0192275	0.0190664	0.0412678
x3_hydroxybutyrate_p	candidatus_fokinia	-0.174644	-0.146135	-0.170685	-0.196573
x3_hydroxybutyrate_p	candidatus_fonsibacter	0.0100418	0.0729897	-0.0580636	-0.0169926
x3_hydroxybutyrate_p	candidatus_gullanella	-0.000683893	0.0565162	-0.0075401	0.102097
x3_hydroxybutyrate_p	candidatus_hamiltonella	-0.174276	-0.15412	-0.206608	-0.224199
x3_hydroxybutyrate_p	candidatus_hoaglandella	-0.268108	-0.116727	-0.303909	-0.350967
x3_hydroxybutyrate_p	candidatus_ishikawaella	-0.12463	-0.051527	-0.133513	-0.145708
x3_hydroxybutyrate_p	candidatus_izimaplasma	-0.229546	-0.00999285	-0.252473	-0.109019
x3_hydroxybutyrate_p	candidatus_kinetoplastibacterium	-0.103697	-0.122654	-0.151474	-0.0767326
x3_hydroxybutyrate_p	candidatus_korarchaeum	-0.00742699	0.00588412	-0.0224762	-0.0652041
x3_hydroxybutyrate_p	candidatus_koribacter	0.0781754	0.0533107	0.0363558	0.0367968
x3_hydroxybutyrate_p	candidatus_kuenenia	-0.0366312	0.100871	-0.0380847	-0.0809174
x3_hydroxybutyrate_p	candidatus_methanomethylophilus	0.0974086	-0.00859548	0.164153	0.145471
x3_hydroxybutyrate_p	candidatus_methanoplasma	-0.185836	-0.0933949	-0.238834	-0.186334
x3_hydroxybutyrate_p	candidatus_methylopumilus	-0.243175	-0.237215	-0.230141	-0.155559
x3_hydroxybutyrate_p	candidatus_midichloria	-0.0601572	-0.0234876	-0.116944	-0.0359497
x3_hydroxybutyrate_p	candidatus_mikella	-0.0770477	-0.0438701	-0.115455	-0.141977
x3_hydroxybutyrate_p	candidatus_moranella	-0.232092	-0.180281	-0.253194	-0.301983
x3_hydroxybutyrate_p	candidatus_nanopelagicus	0.00593013	0.0260169	-0.062578	0.0225658
x3_hydroxybutyrate_p	candidatus_nasuia	0.0321719	0.0420712	0.0254058	0.169516
x3_hydroxybutyrate_p	candidatus_nitrosocaldus	0.0552255	0.0967112	-0.00590721	0.0894236
x3_hydroxybutyrate_p	candidatus_nitrosoglobus	-0.134118	-0.0834504	-0.154164	-0.0925177
x3_hydroxybutyrate_p	candidatus_nitrosomarinus	-0.0238522	-0.0897535	-0.0365959	0.00102075
x3_hydroxybutyrate_p	candidatus_nitrosopelagicus	0.0487278	0.00666016	0.0126309	0.11896
x3_hydroxybutyrate_p	candidatus_nitrosotenuis	0.0339745	0.0943147	0.0171934	0.00778327
x3_hydroxybutyrate_p	candidatus_nucleicultrix	-0.000684001	0.299391	-0.0792911	-0.0876835
x3_hydroxybutyrate_p	candidatus_paracaedibacter	0.119343	-0.00890552	0.113966	0.111654
x3_hydroxybutyrate_p	candidatus_pelagibacter	0.318678	0.228108	0.260206	0.314915
x3_hydroxybutyrate_p	candidatus_phaeomarinobacter	-0.20996	-0.0397725	-0.271396	-0.175023
x3_hydroxybutyrate_p	candidatus_phycorickettsia	0.278678	0.200151	0.20195	0.205188
x3_hydroxybutyrate_p	candidatus_phytoplasma	-0.0206349	-0.0124178	-0.049563	0.0127922
x3_hydroxybutyrate_p	candidatus_planktophila	-0.296503	-0.0628155	-0.326434	-0.269571
x3_hydroxybutyrate_p	candidatus_portiera	0.0306237	0.0103666	0.0174335	0.053783
x3_hydroxybutyrate_p	candidatus_profftella	0.414536	0.350873	0.333782	0.332074
x3_hydroxybutyrate_p	candidatus_promineofilum	0.0459714	-0.00727396	0.0530689	0.0530461
x3_hydroxybutyrate_p	candidatus_protochlamydia	0.111023	-0.0221766	0.133032	0.172575
x3_hydroxybutyrate_p	candidatus_puniceispirillum	0.0184555	0.194427	-0.0382288	-0.0213896
x3_hydroxybutyrate_p	candidatus_riesia	-0.143538	-0.131582	-0.237057	-0.218681
x3_hydroxybutyrate_p	candidatus_ruthia	-0.0399468	-0.13875	-0.00523485	0.101261
x3_hydroxybutyrate_p	candidatus_solibacter	-0.0889865	-0.0172922	-0.128854	-0.0990874
x3_hydroxybutyrate_p	candidatus_sulcia	0.116143	0.220254	0.0666122	0.0933258
x3_hydroxybutyrate_p	candidatus_symbiobacter	0.0616548	-0.0277738	-0.00379406	0.132027
x3_hydroxybutyrate_p	candidatus_tachikawaea	0.176967	0.314336	0.0788589	0.174473
x3_hydroxybutyrate_p	candidatus_thioglobus	0.0302825	0.175354	0.0212275	0.00657974
x3_hydroxybutyrate_p	candidatus_tremblaya	-0.0662993	-0.155071	-0.0536932	-0.174157
x3_hydroxybutyrate_p	candidatus_walczuchella	0.0668451	0.0492656	0.0636346	0.12912
x3_hydroxybutyrate_p	candidatus_xiphinematobacter	-0.0349528	-0.101703	-0.0443281	0.0155011
x3_hydroxybutyrate_p	capnocytophaga	0.166907	0.162232	0.219672	0.262367
x3_hydroxybutyrate_p	carboxydocella	-0.0245262	0.0635256	-0.025742	0.067147
x3_hydroxybutyrate_p	carboxydothermus	-0.170851	-0.0620351	-0.112765	-0.0597108
x3_hydroxybutyrate_p	carnobacterium	-0.0757892	-0.0556656	-0.153347	-0.134569
x3_hydroxybutyrate_p	castellaniella	0.271332	0.117139	0.243252	0.169026
x3_hydroxybutyrate_p	catenovulum	0.0906521	0.134828	0.0384209	0.0707329
x3_hydroxybutyrate_p	catenulispora	-0.0777335	-0.202733	-0.0370762	-0.110324
x3_hydroxybutyrate_p	caulobacter	0.0183254	-0.0372862	-0.00316972	0.0722793
x3_hydroxybutyrate_p	cedecea	-0.273014	-0.124975	-0.349822	-0.257756
x3_hydroxybutyrate_p	celeribacter	-0.00311139	-0.0170257	0.0669004	0.057007
x3_hydroxybutyrate_p	cellulomonas	0.069461	0.0256754	0.0351551	0.082653
x3_hydroxybutyrate_p	cellulophaga	-0.0167919	-0.108501	-0.00504274	-0.0443281
x3_hydroxybutyrate_p	cellulosilyticum	-0.161186	-0.0403816	-0.187542	-0.180098
x3_hydroxybutyrate_p	cellulosimicrobium	0.267939	0.149182	0.251225	0.201062
x3_hydroxybutyrate_p	cellvibrio	0.0844968	-0.0373059	0.105513	0.09927
x3_hydroxybutyrate_p	chamaesiphon	0.194819	0.0833889	0.228893	0.220114
x3_hydroxybutyrate_p	chania	0.180663	0.168266	0.24599	0.318444
x3_hydroxybutyrate_p	chelativorans	0.176022	0.0271036	0.225579	0.16832
x3_hydroxybutyrate_p	chelatococcus	-0.017496	-0.145782	0.0914898	0.0719981
x3_hydroxybutyrate_p	chitinophaga	0.0667364	0.0328656	0.219816	0.0874076
x3_hydroxybutyrate_p	chlamydia	-0.112465	-0.00901614	-0.157334	-0.139804
x3_hydroxybutyrate_p	chloracidobacterium	-0.25088	-0.103513	-0.284171	-0.155622
x3_hydroxybutyrate_p	chlorobaculum	0.246924	0.105001	0.265008	0.154356
x3_hydroxybutyrate_p	chlorobium	0.219347	0.157794	0.354961	0.258188
x3_hydroxybutyrate_p	chloroflexus	0.0945376	0.135668	0.080828	0.0966626
x3_hydroxybutyrate_p	chloroherpeton	0.00138168	0.00241059	-0.00657958	0.0101953
x3_hydroxybutyrate_p	chondrocystis	0.00177364	0.0263344	-0.00350591	-0.0438399
x3_hydroxybutyrate_p	chondromyces	-0.0057093	0.023225	0.0983095	0.114762
x3_hydroxybutyrate_p	christensenella	-0.205221	-0.0191457	-0.270675	-0.121122
x3_hydroxybutyrate_p	chromobacterium	0.115233	0.00800281	0.238786	0.11332
x3_hydroxybutyrate_p	chromohalobacter	-0.0996596	-0.195498	-0.0123427	0.0106644
x3_hydroxybutyrate_p	chroococcidiopsis	0.101262	0.173238	0.0532129	0.11307
x3_hydroxybutyrate_p	chryseobacterium	-0.111544	-0.105581	-0.0504274	-0.0258861
x3_hydroxybutyrate_p	chthonomonas	0.0151187	0.132494	-0.071655	-0.0135344
x3_hydroxybutyrate_p	citrobacter	-0.138046	0.0862987	-0.164105	-0.185333
x3_hydroxybutyrate_p	citromicrobium	0.209748	-0.00695345	0.182307	0.211282
x3_hydroxybutyrate_p	clavibacter	-0.0143773	-0.0218734	0.0509557	0.0621473
x3_hydroxybutyrate_p	cloacibacillus	0.0713161	0.00465219	0.136298	0.109644
x3_hydroxybutyrate_p	clostridioides	-0.116023	-0.102909	-0.227884	-0.0700701
x3_hydroxybutyrate_p	clostridium	-0.101032	0.0588427	-0.174191	-0.165546
x3_hydroxybutyrate_p	cnuibacter	-0.115836	-0.0372266	-0.11483	-0.0585148
x3_hydroxybutyrate_p	cobetia	0.041645	-0.0281823	0.0151282	0.093898
x3_hydroxybutyrate_p	cohaesibacter	0.121314	0.168227	0.127509	0.128339
x3_hydroxybutyrate_p	collimonas	-0.117535	-0.0853019	-0.0693978	-0.0236289
x3_hydroxybutyrate_p	collinsella	-0.0251819	-0.120426	-0.0810201	-0.012919
x3_hydroxybutyrate_p	colwellia	0.124799	-0.000397805	0.0563827	0.090001
x3_hydroxybutyrate_p	comamonas	0.019634	0.0846779	0.12165	0.105369
x3_hydroxybutyrate_p	conexibacter	-0.217998	-0.115702	-0.259053	-0.134185
x3_hydroxybutyrate_p	confluentimicrobium	-0.101503	-0.0511162	-0.113726	-0.00805183
x3_hydroxybutyrate_p	congregibacter	-0.0588498	-0.115002	-0.0357314	-0.00622836
x3_hydroxybutyrate_p	coprothermobacter	-0.018211	-0.0861325	-0.0359235	0.0310053
x3_hydroxybutyrate_p	coraliomargarita	-0.0069433	-0.0580763	0.0232927	0.0583768
x3_hydroxybutyrate_p	corallococcus	0.0423809	-0.129193	0.0138315	0.0643859
x3_hydroxybutyrate_p	coriobacterium	-0.254392	0.0938567	-0.319134	-0.178517
x3_hydroxybutyrate_p	corynebacterium	-0.195942	-0.053061	-0.133657	-0.0234848
x3_hydroxybutyrate_p	coxiella	-0.0516678	0.157689	-0.226587	-0.19749
x3_hydroxybutyrate_p	crinalium	-0.122752	-0.0821827	-0.156997	-0.113737
x3_hydroxybutyrate_p	croceibacter	-0.0242911	-0.115453	0.0144559	0.0466245
x3_hydroxybutyrate_p	croceicoccus	0.133784	-0.0460431	0.157766	0.14001
x3_hydroxybutyrate_p	cronobacter	-0.278637	-0.080926	-0.298867	-0.209634
x3_hydroxybutyrate_p	cryobacterium	0.0432068	-0.0111669	0.0366439	0.0571284
x3_hydroxybutyrate_p	cryptobacterium	-0.44167	-0.225314	-0.475363	-0.218092
x3_hydroxybutyrate_p	cuniculiplasma	0.0427569	0.011171	0.0124868	0.0363767
x3_hydroxybutyrate_p	cupriavidus	0.0471113	-0.0180342	0.160023	0.132168
x3_hydroxybutyrate_p	curtobacterium	0.0690252	-0.0503201	0.112669	0.0955743
x3_hydroxybutyrate_p	curvibacter	-0.209227	-0.0940162	-0.188166	-0.115143
x3_hydroxybutyrate_p	cutibacterium	-0.187914	-0.131268	-0.246326	-0.116752
x3_hydroxybutyrate_p	cyanobacterium	0.158635	0.043436	0.150514	0.167151
x3_hydroxybutyrate_p	cyanobium	0.093472	-0.0742305	0.113966	0.0751867
x3_hydroxybutyrate_p	cyanothece	0.173528	0.120269	0.15498	0.116271
x3_hydroxybutyrate_p	cyclobacterium	0.269249	0.0161496	0.282346	0.213881
x3_hydroxybutyrate_p	cycloclasticus	0.31483	0.60009	0.229853	0.284339
x3_hydroxybutyrate_p	cylindrospermum	-0.176239	-0.113082	-0.254154	-0.193957
x3_hydroxybutyrate_p	cystobacter	0.0591951	-0.00926471	0.057055	0.0666683
x3_hydroxybutyrate_p	cytophaga	0.161424	0.116386	0.183508	0.172671
x3_hydroxybutyrate_p	dactylococcopsis	0.190438	0.0241951	0.243204	0.237307
x3_hydroxybutyrate_p	dechloromonas	-0.0124359	-0.123744	0.0113822	-0.00403613
x3_hydroxybutyrate_p	deferribacter	-0.127406	0.0336551	-0.142974	-0.100276
x3_hydroxybutyrate_p	defluviimonas	0.105164	-0.0506966	0.110268	0.11514
x3_hydroxybutyrate_p	defluviitoga	-0.0303855	-0.0211908	-0.057007	-0.010905
x3_hydroxybutyrate_p	dehalobacter	-0.181407	0.0275447	-0.191528	-0.0535491
x3_hydroxybutyrate_p	dehalobacterium	-0.135111	-0.0445003	-0.11728	-0.0221881
x3_hydroxybutyrate_p	dehalococcoides	0.0692661	-0.0331865	0.153636	0.123715
x3_hydroxybutyrate_p	dehalogenimonas	-0.278064	-0.0540899	-0.272116	-0.0667819
x3_hydroxybutyrate_p	deinococcus	0.0234733	-0.0126143	0.103112	0.0804918
x3_hydroxybutyrate_p	delftia	-0.0161574	-0.0277023	0.00662761	0.0285303
x3_hydroxybutyrate_p	denitrobacterium	-0.151587	0.0126231	-0.166987	-0.0555676
x3_hydroxybutyrate_p	denitrovibrio	0.0724952	0.00587983	0.071751	0.0727624
x3_hydroxybutyrate_p	dermabacter	-0.0486904	-0.0660472	-0.0690135	-0.00683944
x3_hydroxybutyrate_p	dermacoccus	-0.0390518	0.201594	-0.021996	-0.059414
x3_hydroxybutyrate_p	dermatophilus	-0.277878	-0.130535	-0.230669	-0.199639
x3_hydroxybutyrate_p	desulfallas	0.0297008	0.0872195	-0.0427913	-0.0131355
x3_hydroxybutyrate_p	desulfarculus	0.152114	0.0349005	0.202622	0.145389
x3_hydroxybutyrate_p	desulfatibacillum	0.015851	0.0231549	0.0760254	0.0791249
x3_hydroxybutyrate_p	desulfitobacterium	-0.110844	-0.0504074	-0.189223	-0.0426952
x3_hydroxybutyrate_p	desulfobacca	-0.136845	-0.086112	-0.115503	-0.0604648
x3_hydroxybutyrate_p	desulfobacter	-0.0474436	-0.0907164	-0.034915	-0.0829329
x3_hydroxybutyrate_p	desulfobacterium	0.0528638	-0.0269646	0.0796273	0.0944284
x3_hydroxybutyrate_p	desulfobacula	-0.0713537	-0.0137836	-0.0541735	-0.0297791
x3_hydroxybutyrate_p	desulfobulbus	0.109499	0.0403576	0.0471617	0.0934611
x3_hydroxybutyrate_p	desulfocapsa	0.145745	0.123655	0.123043	0.171694
x3_hydroxybutyrate_p	desulfococcus	0.118363	0.143971	0.0908174	0.0959562
x3_hydroxybutyrate_p	desulfofarcimen	-0.10678	-0.0365903	-0.045961	-0.0988378
x3_hydroxybutyrate_p	desulfohalobium	0.0815355	0.0514892	0.069926	0.107645
x3_hydroxybutyrate_p	desulfomicrobium	-0.110868	0.034621	-0.0255979	0.0420229
x3_hydroxybutyrate_p	desulfomonile	-0.147808	-0.0195846	-0.147872	-0.123727
x3_hydroxybutyrate_p	desulfosporosinus	-0.259286	0.00768041	-0.203583	-0.131688
x3_hydroxybutyrate_p	desulfotalea	-0.0167001	-0.0865541	-0.0044184	0.0142204
x3_hydroxybutyrate_p	desulfotomaculum	-0.101291	-0.104696	0.00302565	-0.0129671
x3_hydroxybutyrate_p	desulfovibrio	0.019926	0.100687	0.0664682	0.047834
x3_hydroxybutyrate_p	desulfurella	0.108245	0.101907	0.0309769	0.0558052
x3_hydroxybutyrate_p	desulfurispirillum	-0.112973	0.0012911	-0.132792	-0.0572232
x3_hydroxybutyrate_p	desulfurivibrio	0.170282	-0.0250815	0.259629	0.189554
x3_hydroxybutyrate_p	desulfurobacterium	-0.190285	-0.0966722	-0.204015	-0.185255
x3_hydroxybutyrate_p	desulfurococcus	-0.0733119	-0.114643	-0.0620498	-0.278284
x3_hydroxybutyrate_p	desulfuromonas	-0.219633	-0.0168603	-0.0981654	-0.00509077
x3_hydroxybutyrate_p	devosia	0.106705	0.0716675	0.132552	0.145087
x3_hydroxybutyrate_p	devriesea	-0.00625505	0.090858	-0.0328979	-0.0540541
x3_hydroxybutyrate_p	dialister	0.104649	0.11425	0.0719912	0.105033
x3_hydroxybutyrate_p	diaphorobacter	-0.037689	-0.0794573	-0.049611	0.0196296
x3_hydroxybutyrate_p	dichelobacter	-0.0735937	0.0840005	-0.0940352	-0.0497969
x3_hydroxybutyrate_p	dickeya	-0.139613	0.0374699	-0.221689	-0.116031
x3_hydroxybutyrate_p	dictyoglomus	-0.156233	0.0106177	-0.237969	-0.206436
x3_hydroxybutyrate_p	dietzia	0.0404425	0.0297245	0.0303045	0.0408702
x3_hydroxybutyrate_p	dinoroseobacter	0.202881	-0.0270572	0.193689	0.166731
x3_hydroxybutyrate_p	dokdonella	-0.128213	-0.0562568	-0.084622	-0.00218571
x3_hydroxybutyrate_p	dokdonia	0.181623	0.0471403	0.24599	0.208001
x3_hydroxybutyrate_p	dolichospermum	0.208866	0.196775	0.209154	0.248078
x3_hydroxybutyrate_p	draconibacterium	0.197904	0.174336	0.268562	0.322688
x3_hydroxybutyrate_p	dyadobacter	0.333216	0.0402979	0.386658	0.317963
x3_hydroxybutyrate_p	dyella	-0.00960015	-0.114759	-0.01095	0.0432235
x3_hydroxybutyrate_p	echinicola	0.278869	0.254128	0.316636	0.302709
x3_hydroxybutyrate_p	ectothiorhodospira	0.0689788	0.014771	0.0816924	0.0605391
x3_hydroxybutyrate_p	edwardsiella	-0.16489	-0.00649235	-0.326338	-0.126261
x3_hydroxybutyrate_p	eggerthella	0.0822184	0.0917214	0.080876	0.0796753
x3_hydroxybutyrate_p	ehrlichia	-0.0684631	0.0653161	-0.126645	-0.0916582
x3_hydroxybutyrate_p	eikenella	-0.0406422	-0.0509768	-0.080876	0.0855756
x3_hydroxybutyrate_p	elizabethkingia	0.0754049	-0.0492475	0.131592	0.127557
x3_hydroxybutyrate_p	elusimicrobium	0.00548818	-0.10047	0.071703	0.0349197
x3_hydroxybutyrate_p	endomicrobium	-0.173456	-0.0500605	-0.121266	-0.0861671
x3_hydroxybutyrate_p	endozoicomonas	0.0657718	-0.0479668	0.0189703	0.0509089
x3_hydroxybutyrate_p	ensifer	0.383017	0.186089	0.406061	0.232598
x3_hydroxybutyrate_p	enterobacter	-0.218471	0.0180094	-0.434204	-0.329747
x3_hydroxybutyrate_p	enterococcus	-0.0734737	0.0569261	-0.0758333	-0.0903852
x3_hydroxybutyrate_p	entomoplasma	0.20519	0.0541843	0.179762	0.127152
x3_hydroxybutyrate_p	epibacterium	0.106788	0.242837	0.093795	0.0697686
x3_hydroxybutyrate_p	ereboglobus	0.0048644	-0.0515972	0.0243973	0.0463083
x3_hydroxybutyrate_p	erwinia	-0.214372	-0.137295	-0.184084	-0.170253
x3_hydroxybutyrate_p	erysipelatoclostridium	0.0751645	0.107839	0.0519643	0.118012
x3_hydroxybutyrate_p	erysipelothrix	0.00336579	0.032775	-0.109452	-0.0674767
x3_hydroxybutyrate_p	erythrobacter	0.192362	0.122945	0.147728	0.0843359
x3_hydroxybutyrate_p	escherichia	-0.182106	-0.168574	-0.165402	-0.202526
x3_hydroxybutyrate_p	ethanoligenens	-0.14258	-0.0595482	-0.100231	-0.0358755
x3_hydroxybutyrate_p	eubacterium	0.0115822	-0.00479505	0.0381327	0.075401
x3_hydroxybutyrate_p	euzebya	0.184094	-0.0386328	0.209826	0.183141
x3_hydroxybutyrate_p	exiguobacterium	-0.121149	0.0930841	-0.100999	-0.0644991
x3_hydroxybutyrate_p	ezakiella	0.0935469	-0.0588524	0.144126	0.0672366
x3_hydroxybutyrate_p	faecalibacterium	-0.142467	-0.121023	-0.0810201	-0.109355
x3_hydroxybutyrate_p	faecalibaculum	-0.141709	0.0707191	-0.222457	-0.146624
x3_hydroxybutyrate_p	faecalitalea	-0.149213	0.0486915	-0.283018	-0.120738
x3_hydroxybutyrate_p	fastidiosipila	0.0526872	-0.0911835	-0.00417827	0.112429
x3_hydroxybutyrate_p	fermentimonas	0.0367779	-0.00114715	0.0466814	0.205504
x3_hydroxybutyrate_p	ferrimonas	0.132663	0.00824594	0.123571	0.111084
x3_hydroxybutyrate_p	ferroglobus	0.0666008	0.14744	0.034915	0.200723
x3_hydroxybutyrate_p	ferroplasma	0.0789457	0.0815326	0.0762175	0.238358
x3_hydroxybutyrate_p	fervidobacterium	0.00131275	0.0163224	-0.0176736	0.0120077
x3_hydroxybutyrate_p	fibrella	0.10874	-0.00022956	0.207377	0.165066
x3_hydroxybutyrate_p	fibrobacter	-0.0663916	-0.0524885	0.0228604	-0.00571511
x3_hydroxybutyrate_p	fictibacillus	-0.295592	-0.138956	-0.339545	-0.268178
x3_hydroxybutyrate_p	filifactor	-0.110463	0.087571	-0.24671	-0.0985016
x3_hydroxybutyrate_p	filimonas	0.164675	0.141224	0.208145	0.13779
x3_hydroxybutyrate_p	filomicrobium	0.0593128	-0.0055596	0.0471136	0.0874572
x3_hydroxybutyrate_p	fimbriimonas	0.0452553	0.0640085	0.0787628	0.0791353
x3_hydroxybutyrate_p	finegoldia	-0.0653697	-0.0335212	-0.0833253	-0.0557103
x3_hydroxybutyrate_p	fischerella	-0.118737	0.115147	-0.163097	-0.108564
x3_hydroxybutyrate_p	flammeovirga	0.305119	0.110635	0.264624	0.29143
x3_hydroxybutyrate_p	flavisolibacter	0.0725276	-0.0221945	0.139132	0.147895
x3_hydroxybutyrate_p	flavivirga	-0.0335493	-0.0920904	-0.0223802	0.0328441
x3_hydroxybutyrate_p	flavobacterium	0.187006	0.135012	0.241139	0.213908
x3_hydroxybutyrate_p	flavonifractor	-0.121372	-0.0703492	-0.016521	0.0159447
x3_hydroxybutyrate_p	flexistipes	0.115705	-0.00112566	0.167179	0.207631
x3_hydroxybutyrate_p	fluoribacter	-0.0646208	-0.137193	0.0176256	0.0649927
x3_hydroxybutyrate_p	fluviicola	-0.0166897	-0.130056	0.0515801	0.0211733
x3_hydroxybutyrate_p	formosa	0.113049	-0.0398242	0.116415	0.225889
x3_hydroxybutyrate_p	francisella	-0.0666088	-0.0878722	-0.0729997	-0.0307367
x3_hydroxybutyrate_p	frankia	-0.0113957	0.0417139	0.0917779	0.0689655
x3_hydroxybutyrate_p	frateuria	0.307568	0.126876	0.272596	0.244027
x3_hydroxybutyrate_p	friedmanniella	-0.0246921	-0.124989	-0.0463932	0.0402498
x3_hydroxybutyrate_p	frischella	0.0706878	0.0200142	0.0189223	0.126796
x3_hydroxybutyrate_p	frondihabitans	0.0752292	0.0613348	0.0802997	0.0915169
x3_hydroxybutyrate_p	fuerstia	-0.130491	-0.0898006	-0.212708	-0.120407
x3_hydroxybutyrate_p	fusobacterium	0.136104	0.161795	0.00720392	0.0758333
x3_hydroxybutyrate_p	gallibacterium	-0.0862011	-0.156464	-0.0907694	-0.0610705
x3_hydroxybutyrate_p	gallionella	0.195487	0.00803785	0.1983	0.180004
x3_hydroxybutyrate_p	gardnerella	0.144667	0.0136757	0.192489	0.180213
x3_hydroxybutyrate_p	geitlerinema	0.13612	0.146436	0.100327	0.136839
x3_hydroxybutyrate_p	gemella	-0.174089	-0.063193	-0.200989	-0.134953
x3_hydroxybutyrate_p	geminocystis	-0.12869	-0.00849681	-0.17251	-0.179382
x3_hydroxybutyrate_p	gemmata	0.0241113	0.0174059	0.0368841	0.0537865
x3_hydroxybutyrate_p	gemmatimonas	0.242761	0.0719881	0.237297	0.189001
x3_hydroxybutyrate_p	gemmatirosa	0.0518183	-0.0713194	0.0720392	0.066476
x3_hydroxybutyrate_p	gemmobacter	-0.221096	-0.153669	-0.2275	-0.103716
x3_hydroxybutyrate_p	geoalkalibacter	0.0295315	0.0451784	0.00134473	0.0161852
x3_hydroxybutyrate_p	geobacillus	-0.0976046	0.0197707	-0.171789	-0.0707905
x3_hydroxybutyrate_p	geobacter	-0.0779258	-0.0371091	0.0896648	0.0891365
x3_hydroxybutyrate_p	geodermatophilus	-0.00338787	-0.0480906	0.0316972	0.0332532
x3_hydroxybutyrate_p	geoglobus	0.17036	0.000302328	0.235712	0.197342
x3_hydroxybutyrate_p	geosporobacter	-0.181106	0.00749823	-0.249448	-0.151955
x3_hydroxybutyrate_p	gibbsiella	-0.256222	-0.0731285	-0.345212	-0.272308
x3_hydroxybutyrate_p	gilliamella	-0.0520026	-0.0173694	-0.135722	-0.0845437
x3_hydroxybutyrate_p	gillisia	0.143523	0.230751	0.119489	0.0951586
x3_hydroxybutyrate_p	gilvibacter	0.229828	0.379633	0.220584	0.180156
x3_hydroxybutyrate_p	glaciecola	0.0760109	0.0366198	0.00830852	0.0827895
x3_hydroxybutyrate_p	glaesserella	0.0341689	-0.0479368	0.0129671	0.0702209
x3_hydroxybutyrate_p	gloeobacter	-0.0984066	0.0326581	-0.170877	-0.0698557
x3_hydroxybutyrate_p	gloeocapsa	0.340092	0.262684	0.324272	0.402578
x3_hydroxybutyrate_p	gloeomargarita	0.180139	0.180718	0.22702	0.196848
x3_hydroxybutyrate_p	gluconacetobacter	0.142162	-0.0375908	0.248055	0.190826
x3_hydroxybutyrate_p	gluconobacter	-0.452606	-0.171348	-0.465373	-0.252041
x3_hydroxybutyrate_p	glutamicibacter	-0.0587135	0.063013	-0.0885122	-0.0163848
x3_hydroxybutyrate_p	gordonia	-0.179201	-0.00886628	-0.123235	-0.0162328
x3_hydroxybutyrate_p	gordonibacter	0.0751595	0.00970676	0.0952838	0.0599846
x3_hydroxybutyrate_p	gottschalkia	-0.0629194	-0.0595075	-0.114398	-0.0290078
x3_hydroxybutyrate_p	gramella	0.179646	0.0523955	0.257036	0.241764
x3_hydroxybutyrate_p	granulibacter	0.226096	0.14297	0.211219	0.131863
x3_hydroxybutyrate_p	granulicella	0.0962389	0.0894978	0.0217558	0.0465865
x3_hydroxybutyrate_p	granulosicoccus	-0.20142	-0.0101578	-0.297234	-0.168956
x3_hydroxybutyrate_p	grimontia	-0.165936	-0.108105	-0.220008	-0.114497
x3_hydroxybutyrate_p	gynuella	0.284289	0.213888	0.279704	0.13655
x3_hydroxybutyrate_p	haematospirillum	0.162227	0.140343	0.167611	0.126507
x3_hydroxybutyrate_p	haemophilus	-0.138515	-0.10747	-0.130967	-0.00705984
x3_hydroxybutyrate_p	hafnia	-0.293572	-0.0994481	-0.374844	-0.246182
x3_hydroxybutyrate_p	hahella	0.233929	0.000271816	0.273269	0.280035
x3_hydroxybutyrate_p	halalkalicoccus	0.0185084	0.111699	-0.0927865	-0.0105242
x3_hydroxybutyrate_p	halanaeroarchaeum	0.0788507	-0.0359057	0.0417827	0.125949
x3_hydroxybutyrate_p	halanaerobium	0.101952	0.0657466	0.0528287	0.097397
x3_hydroxybutyrate_p	haliangium	-0.196758	-0.180432	-0.144703	-0.0513646
x3_hydroxybutyrate_p	halioglobus	0.350971	0.219295	0.356882	0.261436
x3_hydroxybutyrate_p	haliscomenobacter	0.207645	0.13343	0.246566	0.260523
x3_hydroxybutyrate_p	haloarcula	-0.110481	-0.0557819	-0.135674	-0.0492824
x3_hydroxybutyrate_p	halobacillus	-0.114878	-0.0392163	-0.0960042	-0.180482
x3_hydroxybutyrate_p	halobacteriovorax	0.138542	0.160801	0.105129	0.0882982
x3_hydroxybutyrate_p	halobacterium	-0.23206	-0.218534	-0.207281	-0.0986531
x3_hydroxybutyrate_p	halobacteroides	-0.0692287	0.0123459	-0.109932	-0.0250907
x3_hydroxybutyrate_p	halobiforma	-0.0851282	-0.095721	-0.0542695	-0.0208264
x3_hydroxybutyrate_p	halocynthiibacter	-0.189792	0.0514958	-0.211027	-0.189515
x3_hydroxybutyrate_p	halodesulfurarchaeum	0.100436	-0.0162713	0.131928	0.115013
x3_hydroxybutyrate_p	haloferax	0.244294	0.13025	0.265152	0.211165
x3_hydroxybutyrate_p	halogeometricum	0.0969991	-0.100775	0.193881	0.178627
x3_hydroxybutyrate_p	halohasta	-0.036195	-0.00776956	-0.042215	-0.0101841
x3_hydroxybutyrate_p	halomicrobium	-0.117503	0.0420863	-0.174527	-0.0909604
x3_hydroxybutyrate_p	halomicronema	0.0382781	0.0641977	-0.00840457	0.00466245
x3_hydroxybutyrate_p	halomonas	0.152074	-0.0470851	0.159495	0.0785227
x3_hydroxybutyrate_p	halopenitus	0.0685407	0.00880372	0.0574392	0.102361
x3_hydroxybutyrate_p	halopiger	-0.100708	-0.138196	0.0143598	0.000426772
x3_hydroxybutyrate_p	haloplanus	0.152005	-0.0581164	0.1095	0.234624
x3_hydroxybutyrate_p	haloquadratum	-0.0634149	-0.0720494	-0.142109	-0.0956371
x3_hydroxybutyrate_p	halorhabdus	-0.0593867	0.166546	-0.016521	-0.0407644
x3_hydroxybutyrate_p	halorhodospira	0.128181	0.142972	0.0824609	0.0935375
x3_hydroxybutyrate_p	halorientalis	-0.227605	-0.0895046	-0.282442	-0.199172
x3_hydroxybutyrate_p	halorubrum	0.0125767	-0.0252278	0.125684	0.0496513
x3_hydroxybutyrate_p	halostagnicola	-0.107301	-0.162798	-0.0935549	0.0638063
x3_hydroxybutyrate_p	halotalea	0.122383	-0.0118592	0.0942753	0.105722
x3_hydroxybutyrate_p	haloterrigena	-0.00551808	-0.0565783	-0.00470656	0.0641843
x3_hydroxybutyrate_p	halothece	-0.0599848	0.397312	-0.276775	-0.151939
x3_hydroxybutyrate_p	halothermothrix	0.0835831	0.0915066	0.0806359	0.0947646
x3_hydroxybutyrate_p	halothiobacillus	-0.113989	-0.0746621	-0.104073	0.00321775
x3_hydroxybutyrate_p	hartmannibacter	0.0292568	0.0951623	0.0387571	0.0316919
x3_hydroxybutyrate_p	helicobacter	0.130529	0.275908	0.0903852	0.120305
x3_hydroxybutyrate_p	heliobacterium	-0.208415	-0.0939516	-0.235904	-0.116271
x3_hydroxybutyrate_p	herbaspirillum	-0.0213052	-0.000673709	-0.0324657	0.00408222
x3_hydroxybutyrate_p	herbinix	-0.361288	-0.113781	-0.401402	-0.256748
x3_hydroxybutyrate_p	herbivorax	-0.00831823	0.0562728	0.014648	-0.00547498
x3_hydroxybutyrate_p	herminiimonas	-0.0117502	-0.149286	-0.0449525	-0.0911013
x3_hydroxybutyrate_p	hippea	0.13404	0.261283	0.108779	0.0606598
x3_hydroxybutyrate_p	hirschia	0.197597	0.260184	0.137739	0.154174
x3_hydroxybutyrate_p	histophilus	0.0557441	-0.0488889	0.14014	0.00648353
x3_hydroxybutyrate_p	hoeflea	-0.139011	0.0588579	-0.161224	-0.0286373
x3_hydroxybutyrate_p	homo	-0.270821	-0.124392	-0.28734	-0.271588
x3_hydroxybutyrate_p	hoyosella	0.0479671	0.0956985	0.0503314	0.0367908
x3_hydroxybutyrate_p	hydrogenobacter	0.0472869	-0.0201079	0.0800115	0.091685
x3_hydroxybutyrate_p	hydrogenobaculum	-0.053289	0.00708082	-0.0866872	0.0160144
x3_hydroxybutyrate_p	hydrogenophaga	0.250062	0.227402	0.209154	0.233071
x3_hydroxybutyrate_p	hydrogenovibrio	-0.00598433	-0.0303087	-0.014648	0.00745911
x3_hydroxybutyrate_p	hydromonas	0.106043	-0.042726	0.101287	0.139848
x3_hydroxybutyrate_p	hymenobacter	0.110371	0.021633	0.198204	0.17616
x3_hydroxybutyrate_p	hyperthermus	0.0594114	0.155863	0.00158486	0.133806
x3_hydroxybutyrate_p	hyphomicrobium	0.14996	0.0507263	0.176208	0.138988
x3_hydroxybutyrate_p	hyphomonas	0.16166	0.0533933	0.116415	0.122334
x3_hydroxybutyrate_p	ichthyobacterium	0.221219	0.291429	0.044088	0.0685717
x3_hydroxybutyrate_p	idiomarina	-0.360184	-0.20967	-0.3966	-0.395879
x3_hydroxybutyrate_p	ignavibacterium	0.0150294	0.215234	-0.0579195	-0.0171117
x3_hydroxybutyrate_p	ignicoccus	0.0505912	0.0245236	0.00638747	0.112038
x3_hydroxybutyrate_p	ilyobacter	0.070855	0.174867	-0.0851983	0.0713188
x3_hydroxybutyrate_p	immundisolibacter	0.0165359	-0.143773	0.0457689	0.0338601
x3_hydroxybutyrate_p	intestinimonas	0.00306245	-0.0273721	0.090145	0.0855345
x3_hydroxybutyrate_p	intrasporangium	-0.241867	-0.12338	-0.182499	-0.0724709
x3_hydroxybutyrate_p	isoptericola	-0.312959	-0.192447	-0.281097	-0.148838
x3_hydroxybutyrate_p	isosphaera	0.107894	-0.00414393	0.0442321	0.14922
x3_hydroxybutyrate_p	janibacter	0.0614983	0.0517227	0.0582557	0.0826129
x3_hydroxybutyrate_p	jannaschia	0.0625059	0.0257592	0.119729	0.0537056
x3_hydroxybutyrate_p	janthinobacterium	0.227479	-0.0459569	0.210018	0.187254
x3_hydroxybutyrate_p	jatrophihabitans	0.133282	-0.0439262	0.142061	0.137801
x3_hydroxybutyrate_p	jeongeupia	0.371666	0.134499	0.338248	0.284073
x3_hydroxybutyrate_p	jeotgalibaca	0.0468944	0.0163286	0.0351071	0.0867832
x3_hydroxybutyrate_p	jeotgalibacillus	-0.196033	0.0328029	-0.197243	-0.15743
x3_hydroxybutyrate_p	jeotgalicoccus	-0.0593175	0.143319	-0.0586879	-0.0798454
x3_hydroxybutyrate_p	jiangella	-0.164101	-0.16182	-0.14331	-0.0278305
x3_hydroxybutyrate_p	jonesia	-0.054353	0.0862123	-0.162424	-0.0861458
x3_hydroxybutyrate_p	jonquetella	-0.1176	-0.0574669	-0.0623859	0.0248301
x3_hydroxybutyrate_p	kangiella	0.0656196	0.00554294	0.0544136	0.0721833
x3_hydroxybutyrate_p	ketobacter	-0.0387887	-0.0821781	0.00369801	0.0153757
x3_hydroxybutyrate_p	ketogulonicigenium	-0.195354	-0.125663	-0.214629	-0.138095
x3_hydroxybutyrate_p	kibdelosporangium	-0.0786236	0.0299635	-0.15743	-0.0745993
x3_hydroxybutyrate_p	kineococcus	-0.0418834	-0.129299	0.0198828	0.0642974
x3_hydroxybutyrate_p	kingella	-0.157372	-0.1798	-0.199981	-0.111808
x3_hydroxybutyrate_p	kiritimatiella	0.0333771	-0.111963	0.0713188	0.114052
x3_hydroxybutyrate_p	kitasatospora	-0.00506552	-0.0427156	0.0468735	0.014744
x3_hydroxybutyrate_p	klebsiella	-0.273125	-0.0492411	-0.364182	-0.308712
x3_hydroxybutyrate_p	kluyvera	-0.297088	-0.201834	-0.335943	-0.305232
x3_hydroxybutyrate_p	kocuria	0.103609	0.0230989	0.112861	0.0414946
x3_hydroxybutyrate_p	komagataeibacter	-0.205482	-0.00803808	-0.20243	-0.0248295
x3_hydroxybutyrate_p	kosakonia	-0.142361	-0.0694811	-0.0463932	-0.197243
x3_hydroxybutyrate_p	kosmotoga	0.142179	0.0231538	0.115023	0.155149
x3_hydroxybutyrate_p	kozakia	-0.154216	0.00641842	-0.130967	-0.147367
x3_hydroxybutyrate_p	kribbella	0.057175	0.00606783	0.0517241	0.0971101
x3_hydroxybutyrate_p	kurthia	-0.230935	-0.181969	-0.327874	-0.170493
x3_hydroxybutyrate_p	kushneria	0.000246876	-0.121464	-0.00811642	-0.0379656
x3_hydroxybutyrate_p	kutzneria	0.00658608	0.0230338	0.0261262	0.0541857
x3_hydroxybutyrate_p	kyrpidia	-0.0395887	0.22556	-0.0519162	-0.00591218
x3_hydroxybutyrate_p	kytococcus	-0.0792581	-0.0952045	-0.00984536	0.0187325
x3_hydroxybutyrate_p	labrenzia	0.294086	0.113319	0.347613	0.260206
x3_hydroxybutyrate_p	laceyella	-0.171657	0.0404536	-0.160695	-0.0875036
x3_hydroxybutyrate_p	lachnoclostridium	-0.0324818	-0.0621264	0.0675247	0.07713
x3_hydroxybutyrate_p	lacimicrobium	-0.0702779	0.0499055	-0.0824128	-0.118156
x3_hydroxybutyrate_p	lacinutrix	0.25347	0.210671	0.240179	0.258553
x3_hydroxybutyrate_p	lactobacillus	-0.112486	-0.0966658	-0.156709	0.00590721
x3_hydroxybutyrate_p	lactococcus	-0.181984	-0.03768	-0.234848	-0.215445
x3_hydroxybutyrate_p	lacunisphaera	-0.0701079	-0.145486	-0.0546057	-0.0173761
x3_hydroxybutyrate_p	laribacter	-0.132927	-0.121511	-0.163817	-0.051633
x3_hydroxybutyrate_p	lawsonella	-0.138047	-0.0036473	-0.135722	-0.0966761
x3_hydroxybutyrate_p	lawsonia	0.0405407	0.0608515	0.0150322	0.0610705
x3_hydroxybutyrate_p	leadbetterella	0.296907	0.0659639	0.32677	0.338184
x3_hydroxybutyrate_p	leclercia	-0.319197	-0.124757	-0.381231	-0.334646
x3_hydroxybutyrate_p	legionella	0.0817559	0.107119	-0.00998943	0.0708866
x3_hydroxybutyrate_p	leifsonia	0.34819	0.196307	0.31606	0.173086
x3_hydroxybutyrate_p	leisingera	0.00654979	0.0322594	0.0880319	0.0591949
x3_hydroxybutyrate_p	lelliottia	-0.197619	-0.0937734	-0.272981	-0.187782
x3_hydroxybutyrate_p	leminorella	-0.0224761	-0.103969	-0.130439	-0.0178661
x3_hydroxybutyrate_p	lentibacillus	-0.12153	-0.064739	-0.0813082	-0.10213
x3_hydroxybutyrate_p	lentzea	0.00810656	0.0161695	0.047738	0.0780756
x3_hydroxybutyrate_p	leptolyngbya	-0.268116	0.0666435	-0.2786	-0.168605
x3_hydroxybutyrate_p	leptospira	-0.0889265	-0.00600724	-0.0375564	-0.0248295
x3_hydroxybutyrate_p	leptospirillum	0.0689995	0.0867595	0.132648	0.102969
x3_hydroxybutyrate_p	leptothrix	0.274457	0.171663	0.246134	0.183888
x3_hydroxybutyrate_p	leptotrichia	0.0592775	0.0918124	-0.0296321	0.0615215
x3_hydroxybutyrate_p	leuconostoc	-0.0995767	-0.0821444	-0.102488	-0.0947075
x3_hydroxybutyrate_p	libanicoccus	-0.134347	-0.0659621	-0.182499	-0.055134
x3_hydroxybutyrate_p	liberibacter	-0.053765	-0.0556199	-0.0885122	-0.0571319
x3_hydroxybutyrate_p	limnobaculum	-0.227453	-0.157132	-0.306167	-0.243108
x3_hydroxybutyrate_p	limnochorda	0.0737381	0.0076318	0.12093	0.100375
x3_hydroxybutyrate_p	limnohabitans	-0.00771595	-0.118795	0.00437038	0.0130182
x3_hydroxybutyrate_p	listeria	-0.0487382	0.0205028	-0.147776	-0.0813563
x3_hydroxybutyrate_p	luteibacter	-0.0484516	-0.0229296	-0.145327	0.00720998
x3_hydroxybutyrate_p	luteimonas	-0.168625	-0.0872411	-0.0957641	0.0361483
x3_hydroxybutyrate_p	luteipulveratus	-0.0638913	-0.0841666	-0.132408	0.0354909
x3_hydroxybutyrate_p	luteitalea	-0.042121	-0.0813578	0.00946115	0.0268012
x3_hydroxybutyrate_p	lutibacter	0.35864	0.186878	0.34574	0.329795
x3_hydroxybutyrate_p	lysinibacillus	-0.0122811	0.122899	-0.0221881	-0.00120065
x3_hydroxybutyrate_p	lysobacter	0.27283	0.0955825	0.205696	0.138171
x3_hydroxybutyrate_p	macrococcus	-0.075584	0.0327267	-0.136971	-0.0725195
x3_hydroxybutyrate_p	mageeibacillus	-0.229481	-0.104044	-0.127942	-0.0855826
x3_hydroxybutyrate_p	magnetococcus	0.114241	0.0780927	0.134905	0.123043
x3_hydroxybutyrate_p	magnetospira	-0.312725	-0.118286	-0.303285	-0.134966
x3_hydroxybutyrate_p	magnetospirillum	0.0960856	-0.0217052	0.0513399	0.101191
x3_hydroxybutyrate_p	mahella	-0.188087	-0.0160303	-0.181347	-0.12117
x3_hydroxybutyrate_p	mannheimia	0.0286891	-0.0440348	0.0390933	0.0323216
x3_hydroxybutyrate_p	maribacter	0.0232322	-0.110679	0.086351	-0.0302565
x3_hydroxybutyrate_p	maricaulis	0.250548	0.290466	0.215157	0.152812
x3_hydroxybutyrate_p	marichromatium	-0.0846667	-0.139022	-0.0832293	-0.00588461
x3_hydroxybutyrate_p	marinilactibacillus	-0.0556579	0.0513472	-0.117904	-0.074002
x3_hydroxybutyrate_p	marinithermus	0.098489	0.0356685	0.123763	0.120669
x3_hydroxybutyrate_p	marinitoga	0.193733	0.174957	0.139756	0.107109
x3_hydroxybutyrate_p	marinobacter	0.18933	0.068395	0.259341	0.12823
x3_hydroxybutyrate_p	marinobacterium	-0.200517	-0.0965056	-0.177553	0.00960546
x3_hydroxybutyrate_p	marinomonas	0.0267332	-0.066318	0.00965325	0.0161848
x3_hydroxybutyrate_p	marinovum	-0.0274406	0.0892624	-0.0715589	-0.0812077
x3_hydroxybutyrate_p	mariprofundus	-0.171315	-0.0671894	-0.141197	-0.046848
x3_hydroxybutyrate_p	marivirga	0.108052	-0.0993449	0.181203	0.180505
x3_hydroxybutyrate_p	marivivens	-0.251794	-0.16373	-0.249976	-0.177277
x3_hydroxybutyrate_p	marmoricola	0.107939	-0.0758739	0.093699	0.144621
x3_hydroxybutyrate_p	martelella	-0.140336	-0.00696442	-0.121794	-0.0358755
x3_hydroxybutyrate_p	massilia	0.172779	0.0197319	0.099222	0.0865911
x3_hydroxybutyrate_p	megamonas	-0.00614128	-0.00953158	-0.0897608	-0.0972049
x3_hydroxybutyrate_p	megasphaera	-0.178228	-0.0920332	-0.20147	-0.0649313
x3_hydroxybutyrate_p	meiothermus	0.0193115	-0.060418	0.0455768	0.0366135
x3_hydroxybutyrate_p	melaminivora	0.222374	-0.0535408	0.293103	0.254235
x3_hydroxybutyrate_p	melioribacter	0.184066	0.154729	0.228172	0.158742
x3_hydroxybutyrate_p	melissococcus	-0.0993469	-0.0526855	-0.143022	-0.106606
x3_hydroxybutyrate_p	melittangium	0.121434	-0.0557936	0.17203	0.139487
x3_hydroxybutyrate_p	mesoplasma	-0.222235	0.00967094	-0.237681	-0.234031
x3_hydroxybutyrate_p	mesorhizobium	-0.0194279	0.0169116	0.0433196	0.0333782
x3_hydroxybutyrate_p	mesotoga	0.0563798	0.0385579	0.0726635	0.0678455
x3_hydroxybutyrate_p	metallosphaera	0.135895	0.151368	0.0949477	0.289215
x3_hydroxybutyrate_p	methanobacterium	-0.135657	-0.1164	-0.0859668	-0.0965588
x3_hydroxybutyrate_p	methanobrevibacter	0.234571	0.479782	0.0262703	0.161128
x3_hydroxybutyrate_p	methanocaldococcus	-0.0610004	-0.113931	-0.0444242	0.0106149
x3_hydroxybutyrate_p	methanocella	-0.0522638	-0.00385983	-0.0741043	0.00769065
x3_hydroxybutyrate_p	methanococcoides	0.0712479	-0.0608254	0.0921621	0.0914296
x3_hydroxybutyrate_p	methanococcus	0.206554	0.0877667	0.263567	0.284538
x3_hydroxybutyrate_p	methanocorpusculum	-0.0686934	-0.021159	-0.101719	-0.100399
x3_hydroxybutyrate_p	methanoculleus	0.308084	0.171572	0.334742	0.298867
x3_hydroxybutyrate_p	methanofollis	0.156817	-0.0070539	0.212275	0.226815
x3_hydroxybutyrate_p	methanohalobium	-0.10949	0.0473782	-0.0829891	-0.0558172
x3_hydroxybutyrate_p	methanohalophilus	-0.0825539	-0.0754805	-0.0562386	-0.0489466
x3_hydroxybutyrate_p	methanolacinia	-0.12713	-0.0605924	-0.0401018	-0.0525481
x3_hydroxybutyrate_p	methanolinea	0.152881	0.0878257	0.190376	0.256318
x3_hydroxybutyrate_p	methanolobus	0.0054614	0.027573	0.0240611	0.00421527
x3_hydroxybutyrate_p	methanomassiliicoccus	0.0182821	-0.0148811	-0.0328499	0.0649224
x3_hydroxybutyrate_p	methanomethylovorans	0.0952831	0.11315	0.077274	0.0502595
x3_hydroxybutyrate_p	methanoplanus	0.157011	0.051853	0.19537	0.198103
x3_hydroxybutyrate_p	methanopyrus	-0.217926	-0.129602	-0.23163	-0.133816
x3_hydroxybutyrate_p	methanoregula	-0.159874	-0.113591	-0.136394	-0.0874881
x3_hydroxybutyrate_p	methanosalsum	0.0185961	0.183345	-0.00403419	-0.0391877
x3_hydroxybutyrate_p	methanosarcina	0.07984	0.0823668	0.0804438	0.0727116
x3_hydroxybutyrate_p	methanosphaera	-0.0559888	0.0713323	-0.0571031	-0.00424314
x3_hydroxybutyrate_p	methanosphaerula	-0.0492419	-0.0568741	-0.0268946	-0.0407726
x3_hydroxybutyrate_p	methanospirillum	-0.0544849	-0.093047	-0.104121	0.0123724
x3_hydroxybutyrate_p	methanothermobacter	0.0784769	0.0555353	0.0986937	0.128662
x3_hydroxybutyrate_p	methanothermococcus	-0.172849	-0.137965	-0.153924	-0.194644
x3_hydroxybutyrate_p	methanothermus	0.0774954	0.1899	0.0190183	0.0537308
x3_hydroxybutyrate_p	methanothrix	-0.0856572	0.00287016	-0.101815	-0.0588577
x3_hydroxybutyrate_p	methanotorris	-0.0546124	-0.146704	-0.115311	-0.0975033
x3_hydroxybutyrate_p	methylacidiphilum	-0.0663151	-0.144394	0.00686774	0.0450212
x3_hydroxybutyrate_p	methylibium	-0.08853	-0.0749929	-0.138651	-0.0267154
x3_hydroxybutyrate_p	methylobacillus	-0.110533	-0.0406491	-0.15767	-0.100626
x3_hydroxybutyrate_p	methylobacterium	0.122831	-0.0160413	0.126357	0.0941792
x3_hydroxybutyrate_p	methyloceanibacter	-0.0453587	0.0595698	-0.00633945	0.0327066
x3_hydroxybutyrate_p	methylocella	0.304469	0.143779	0.288685	0.219344
x3_hydroxybutyrate_p	methylococcus	-0.108932	-0.0493566	-0.157238	-0.0800986
x3_hydroxybutyrate_p	methylocystis	-0.106284	-0.111185	-0.147152	-0.0394813
x3_hydroxybutyrate_p	methylomicrobium	0.186426	-0.0364333	0.254538	0.190637
x3_hydroxybutyrate_p	methylomonas	0.310084	0.188862	0.360964	0.277063
x3_hydroxybutyrate_p	methylophaga	0.240345	0.194192	0.265729	0.250696
x3_hydroxybutyrate_p	methylophilus	0.195307	0.170393	0.16934	0.136465
x3_hydroxybutyrate_p	methylorubrum	0.185219	-0.036902	0.182259	0.146384
x3_hydroxybutyrate_p	methylosinus	-0.202042	-0.231507	-0.151667	-0.0648908
x3_hydroxybutyrate_p	methylotenera	0.11356	-0.0757252	0.1837	0.10404
x3_hydroxybutyrate_p	methyloversatilis	0.0797054	0.169214	0.0308328	0.0558117
x3_hydroxybutyrate_p	methylovorus	0.0389861	0.148873	0.00922102	0.089763
x3_hydroxybutyrate_p	methylovulum	0.0972049	0.0216021	0.0699741	0.131287
x3_hydroxybutyrate_p	micavibrio	0.282407	0.334041	0.261983	0.206484
x3_hydroxybutyrate_p	microbacterium	0.0427484	-0.0862929	0.0235808	0.0895207
x3_hydroxybutyrate_p	microbulbifer	-0.0492862	-0.0670969	-0.0173374	0.0577754
x3_hydroxybutyrate_p	microcella	0.0585216	-0.11392	0.106522	0.132667
x3_hydroxybutyrate_p	microchaete	-0.0493424	-0.0848223	-0.0291519	-0.0483961
x3_hydroxybutyrate_p	micrococcus	-0.110361	-0.149346	-0.109884	0.00537893
x3_hydroxybutyrate_p	microcoleus	0.0611409	-0.0545486	0.117616	0.121275
x3_hydroxybutyrate_p	microcystis	0.282083	0.112844	0.300355	0.242926
x3_hydroxybutyrate_p	microlunatus	0.121806	-0.0126466	0.114542	0.0821217
x3_hydroxybutyrate_p	micromonospora	0.00359141	-0.0983328	0.090097	0.0782346
x3_hydroxybutyrate_p	micropruina	0.00789527	-0.058829	0.0401498	0.081688
x3_hydroxybutyrate_p	microterricola	-0.15439	-0.0268725	-0.117664	0.00653312
x3_hydroxybutyrate_p	microvirga	0.0827312	0.080058	0.133465	0.181731
x3_hydroxybutyrate_p	microvirgula	0.392248	0.119113	0.383248	0.287818
x3_hydroxybutyrate_p	miniimonas	-0.117165	0.0513549	-0.123283	-0.0719443
x3_hydroxybutyrate_p	mitsuaria	0.256597	-0.0541741	0.312074	0.206109
x3_hydroxybutyrate_p	mobiluncus	0.0688524	-0.211655	0.0231006	-0.0243996
x3_hydroxybutyrate_p	modestobacter	-0.0295543	-0.0117139	-0.0815003	0.0307775
x3_hydroxybutyrate_p	mogibacterium	0.0651848	-0.0446734	-0.0612813	-0.00571511
x3_hydroxybutyrate_p	monoglobus	0.0381612	0.0520343	-0.0131592	0.0641629
x3_hydroxybutyrate_p	moorea	0.101562	0.169193	-0.0575353	0.100262
x3_hydroxybutyrate_p	moorella	0.0694589	0.00883918	0.146384	0.11601
x3_hydroxybutyrate_p	moraxella	0.273371	0.115195	0.307127	0.11094
x3_hydroxybutyrate_p	mordavella	-0.290337	-0.174284	-0.335943	-0.206608
x3_hydroxybutyrate_p	morganella	-0.340183	0.036952	-0.412016	-0.48612
x3_hydroxybutyrate_p	moritella	0.221465	0.138631	0.12554	0.245737
x3_hydroxybutyrate_p	mucilaginibacter	0.0213812	0.0658363	0.115215	0.117472
x3_hydroxybutyrate_p	mucinivorans	0.175125	-0.0396859	0.269859	0.155316
x3_hydroxybutyrate_p	murdochiella	-0.0420248	-0.134967	-0.0501393	-0.00129671
x3_hydroxybutyrate_p	muribaculum	0.119975	0.107012	0.224618	0.288877
x3_hydroxybutyrate_p	muricauda	0.215888	0.211189	0.303477	0.308838
x3_hydroxybutyrate_p	mycetocola	0.0282793	0.114572	0.0562386	0.103969
x3_hydroxybutyrate_p	mycobacterium	-0.0741117	-0.0776375	0.0433676	0.0431755
x3_hydroxybutyrate_p	mycobacteroides	0.17794	-0.0263504	0.206608	0.170829
x3_hydroxybutyrate_p	mycolicibacter	-0.119653	0.0807338	-0.123475	-0.0643222
x3_hydroxybutyrate_p	mycolicibacterium	0.201619	-0.0381175	0.230285	0.155172
x3_hydroxybutyrate_p	mycoplasma	-0.0172979	0.0215208	-0.0245414	-0.0223802
x3_hydroxybutyrate_p	myroides	0.0254326	-0.0521904	0.0683892	0.115023
x3_hydroxybutyrate_p	myxococcus	-0.0727628	-0.0635174	0.0111901	0.0391893
x3_hydroxybutyrate_p	nakamurella	-0.136344	-0.148876	-0.111036	-0.0507998
x3_hydroxybutyrate_p	natranaerobius	-0.140734	0.0032813	-0.153972	-0.145379
x3_hydroxybutyrate_p	natrialba	-0.0281708	0.153143	-0.0513399	-0.0534158
x3_hydroxybutyrate_p	natrinema	0.0149689	-0.112999	0.0409663	0.0725613
x3_hydroxybutyrate_p	natronobacterium	-0.0239803	0.0737756	-0.0557103	-0.0560395
x3_hydroxybutyrate_p	natronococcus	0.0399785	0.0912406	0.012823	0.044467
x3_hydroxybutyrate_p	natronomonas	-0.235296	-0.227853	-0.251465	-0.145216
x3_hydroxybutyrate_p	nautilia	-0.0382998	-0.0230662	-0.0525406	0.0525456
x3_hydroxybutyrate_p	ndongobacter	-0.136923	0.0840312	-0.171357	-0.0667339
x3_hydroxybutyrate_p	negativicoccus	0.0918864	0.0958005	0.0448564	0.122659
x3_hydroxybutyrate_p	neisseria	0.223209	0.134155	0.260494	0.0954759
x3_hydroxybutyrate_p	neoasaia	-0.179656	-0.0746065	-0.185525	-0.0636019
x3_hydroxybutyrate_p	neomicrococcus	-0.245488	-0.177332	-0.0700221	-0.0973477
x3_hydroxybutyrate_p	neorhizobium	-0.0946369	-0.0586196	-0.0603208	0.00100865
x3_hydroxybutyrate_p	neorickettsia	0.258618	0.0939614	0.225867	0.255918
x3_hydroxybutyrate_p	niabella	0.0335526	0.0195099	0.07348	0.127128
x3_hydroxybutyrate_p	niastella	0.0611142	-0.0966394	0.112573	0.106837
x3_hydroxybutyrate_p	nitratifractor	-0.0974792	0.058436	-0.0775622	0.0249075
x3_hydroxybutyrate_p	nitratireductor	0.034281	-0.071923	0.0247815	0.0609946
x3_hydroxybutyrate_p	nitratiruptor	0.0809274	0.214598	0.0799635	0.0799897
x3_hydroxybutyrate_p	nitrobacter	-0.17049	-0.146818	-0.152147	-0.0427474
x3_hydroxybutyrate_p	nitrosococcus	-0.0815631	-0.0499582	-0.110508	0.048003
x3_hydroxybutyrate_p	nitrosomonas	0.0345418	0.0822044	0.0485544	0.0262223
x3_hydroxybutyrate_p	nitrosopumilus	0.0512218	-0.0664342	0.0906253	0.12584
x3_hydroxybutyrate_p	nitrososphaera	-0.192966	-0.206294	-0.211795	-0.176736
x3_hydroxybutyrate_p	nitrosospira	-0.0256776	-0.0901542	-0.042263	-0.00782845
x3_hydroxybutyrate_p	nitrospira	0.199528	0.160391	0.141869	0.051532
x3_hydroxybutyrate_p	nitrospirillum	0.184985	0.146815	0.214917	0.151057
x3_hydroxybutyrate_p	niveispirillum	0.350862	0.123913	0.350447	0.245005
x3_hydroxybutyrate_p	nocardia	0.176734	0.105981	0.256988	0.105081
x3_hydroxybutyrate_p	nocardioides	-0.0338992	-0.0982427	0.00802036	0.0342907
x3_hydroxybutyrate_p	nocardiopsis	0.0383865	-0.115151	0.0728076	0.0563242
x3_hydroxybutyrate_p	nodularia	0.189713	0.205037	0.150082	0.321123
x3_hydroxybutyrate_p	nonlabens	0.125592	-0.0394444	0.252233	0.114782
x3_hydroxybutyrate_p	nonomuraea	-0.182857	-0.0344162	-0.130919	-0.0346782
x3_hydroxybutyrate_p	nostoc	0.0205767	-0.0115094	0.00998943	-0.0394295
x3_hydroxybutyrate_p	novibacillus	-0.18626	0.0117761	-0.241908	-0.156336
x3_hydroxybutyrate_p	novosphingobium	0.118882	0.0159582	0.148305	0.115551
x3_hydroxybutyrate_p	obesumbacterium	-0.208212	-0.111229	-0.248295	-0.263841
x3_hydroxybutyrate_p	oblitimonas	0.206588	0.20231	0.142253	0.147404
x3_hydroxybutyrate_p	oceanicoccus	-0.209366	-0.0604472	-0.249736	-0.227731
x3_hydroxybutyrate_p	oceanimonas	-0.0912702	-0.213149	-0.0872154	-0.108261
x3_hydroxybutyrate_p	oceanisphaera	-0.074733	-0.0959595	-0.0750648	-0.0274841
x3_hydroxybutyrate_p	oceanithermus	-0.0988273	-0.0768044	-0.0484584	0.0349183
x3_hydroxybutyrate_p	oceanobacillus	-0.113441	-0.0816591	-0.177841	-0.128758
x3_hydroxybutyrate_p	ochrobactrum	0.166766	0.217474	0.146864	0.0938911
x3_hydroxybutyrate_p	octadecabacter	-0.309523	-0.0162161	-0.346701	-0.155066
x3_hydroxybutyrate_p	odoribacter	0.048528	-0.0536999	0.0805398	0.186437
x3_hydroxybutyrate_p	oenococcus	-0.026475	0.134974	0.0391413	-0.0488473
x3_hydroxybutyrate_p	oleiphilus	-0.0500801	-0.0996514	-0.0282394	0.0259828
x3_hydroxybutyrate_p	oleispira	-0.022284	-0.0592532	-0.00148881	0.0396309
x3_hydroxybutyrate_p	oligella	-0.252851	-0.208594	-0.305254	-0.27489
x3_hydroxybutyrate_p	oligotropha	0.0121285	-0.0887856	-0.0653155	0.017918
x3_hydroxybutyrate_p	olleya	-0.0446871	-0.0295686	-0.0372683	-0.0372107
x3_hydroxybutyrate_p	olsenella	0.0193753	0.0315957	-0.0636826	-0.00936509
x3_hydroxybutyrate_p	opitutus	0.145052	-0.0446803	0.0879358	0.0796945
x3_hydroxybutyrate_p	orientia	0.00173383	0.0663575	0.00470656	0.0117144
x3_hydroxybutyrate_p	ornithobacterium	-0.0412851	-0.130651	0.0462972	0.0436077
x3_hydroxybutyrate_p	orrella	0.129986	0.00468387	0.184084	0.149673
x3_hydroxybutyrate_p	oscillatoria	0.000335313	0.0120145	-0.0184901	0.0222895
x3_hydroxybutyrate_p	oscillibacter	0.00862953	-0.0313189	0.091826	0.0598406
x3_hydroxybutyrate_p	ottowia	0.190465	0.0129008	0.261742	0.166463
x3_hydroxybutyrate_p	owenweeksia	0.0544241	-0.00919494	0.105465	0.128506
x3_hydroxybutyrate_p	oxalobacter	-0.00847268	-0.0635232	0.0395735	0.0707202
x3_hydroxybutyrate_p	paenalcaligenes	0.0171483	0.046881	0.078955	0.0482887
x3_hydroxybutyrate_p	paenarthrobacter	-0.00827666	-0.0182203	-0.00941312	0.13414
x3_hydroxybutyrate_p	paenibacillus	-0.294993	0.0104801	-0.216502	-0.0931227
x3_hydroxybutyrate_p	paeniclostridium	-0.127538	0.0406474	-0.270579	-0.188118
x3_hydroxybutyrate_p	pajaroellobacter	0.00255819	-0.0511003	-0.0199308	0.0559773
x3_hydroxybutyrate_p	palaeococcus	-0.0131376	-0.0732571	-0.0510518	0.00554562
x3_hydroxybutyrate_p	paludibacter	0.222188	0.174573	0.302901	0.307493
x3_hydroxybutyrate_p	paludisphaera	0.08393	-0.124406	0.0241571	0.0323774
x3_hydroxybutyrate_p	pandoraea	-0.0127889	-0.0197272	-0.0448564	0.0211795
x3_hydroxybutyrate_p	pannonibacter	-0.0867874	0.120223	-0.0925463	-0.035228
x3_hydroxybutyrate_p	pantoea	-0.1745	-0.0287583	-0.316492	-0.195995
x3_hydroxybutyrate_p	parabacteroides	0.0851309	0.364392	0.0574392	0.116031
x3_hydroxybutyrate_p	paraburkholderia	0.0133578	-0.00555301	0.0793392	0.107194
x3_hydroxybutyrate_p	parachlamydia	-0.175886	-0.139397	-0.0754971	-0.109926
x3_hydroxybutyrate_p	paracoccus	-0.214841	0.00102588	-0.0645471	-0.0184901
x3_hydroxybutyrate_p	parageobacillus	-0.0370577	0.183012	-0.0225243	-0.0262223
x3_hydroxybutyrate_p	paraglaciecola	-0.229426	-0.174638	-0.259293	-0.200532
x3_hydroxybutyrate_p	paraliobacillus	-0.150602	0.00336511	-0.193978	-0.178436
x3_hydroxybutyrate_p	paraoerskovia	-0.106207	-0.015519	-0.122899	-0.0320979
x3_hydroxybutyrate_p	paraphotobacterium	0.081582	-0.00186611	0.0347229	0.0935167
x3_hydroxybutyrate_p	pararhodospirillum	-0.0284759	0.0335798	-0.0388531	0.0248301
x3_hydroxybutyrate_p	parasaccharibacter	0.256042	0.171657	0.253626	0.238809
x3_hydroxybutyrate_p	parascardovia	0.0379091	-0.0928805	-0.0137835	0.048367
x3_hydroxybutyrate_p	parvibaculum	0.0197377	-0.10778	0.0820286	0.0586624
x3_hydroxybutyrate_p	parvimonas	-0.159455	-0.115323	-0.219672	-0.130706
x3_hydroxybutyrate_p	parvularcula	0.0792088	-0.0438516	0.199789	0.146661
x3_hydroxybutyrate_p	pasteurella	-0.0190861	-0.0482707	0.0493709	0.0144559
x3_hydroxybutyrate_p	paucibacter	0.293141	-0.0645187	0.406829	0.351968
x3_hydroxybutyrate_p	paucimonas	-0.171368	-0.0965638	-0.184997	-0.0915649
x3_hydroxybutyrate_p	pectobacterium	-0.077259	0.0353618	-0.142061	-0.0387571
x3_hydroxybutyrate_p	pediococcus	-0.116759	0.0100481	-0.149986	-0.0658438
x3_hydroxybutyrate_p	pedobacter	0.121244	0.226882	0.19854	0.255019
x3_hydroxybutyrate_p	pelagibaca	-0.0895727	0.0733769	-0.0817405	-0.0230548
x3_hydroxybutyrate_p	pelagibacterium	-0.132682	-0.108124	-0.0668043	-0.0446764
x3_hydroxybutyrate_p	pelobacter	0.0624255	0.0155331	0.0328499	0.0713188
x3_hydroxybutyrate_p	pelodictyon	0.123299	0.0452686	0.13577	0.147824
x3_hydroxybutyrate_p	pelosinus	-0.105879	-0.0958856	-0.0524926	-0.0701662
x3_hydroxybutyrate_p	peptoclostridium	0.0830519	-0.0493632	0.044088	0.0597445
x3_hydroxybutyrate_p	peptoniphilus	-0.0944139	0.0377965	-0.109404	-0.0632984
x3_hydroxybutyrate_p	persephonella	0.1563	0.161643	0.137883	0.149745
x3_hydroxybutyrate_p	persicobacter	0.312051	0.274956	0.405004	0.418678
x3_hydroxybutyrate_p	petrimonas	0.0273187	0.0599349	0.168284	0.099318
x3_hydroxybutyrate_p	petrotoga	0.239849	0.00391337	0.253482	0.243198
x3_hydroxybutyrate_p	phaeobacter	0.108335	0.0774567	0.228941	0.133032
x3_hydroxybutyrate_p	phenylobacterium	0.114515	0.00840456	0.0782826	0.0155573
x3_hydroxybutyrate_p	phoenicibacter	-0.0206717	0.0633418	-0.118144	-0.0269907
x3_hydroxybutyrate_p	photobacterium	-0.15209	-0.0959312	-0.246182	-0.147248
x3_hydroxybutyrate_p	photorhabdus	0.0221587	0.0750243	0.0451446	0.101335
x3_hydroxybutyrate_p	phreatobacter	-0.0513629	-0.0857953	-0.0647872	0.000288295
x3_hydroxybutyrate_p	phycicoccus	-0.0817898	0.0797383	-0.0943713	-0.0370459
x3_hydroxybutyrate_p	phycisphaera	0.00732291	-0.0946116	0.0853424	0.128152
x3_hydroxybutyrate_p	phyllobacterium	0.205325	0.277615	0.16958	0.108805
x3_hydroxybutyrate_p	phytobacter	-0.02663	0.0383656	-0.0876957	-0.0586262
x3_hydroxybutyrate_p	picrophilus	0.0453213	0.160275	-0.0268946	-0.0119874
x3_hydroxybutyrate_p	pimelobacter	-0.14374	-0.204778	-0.0472577	-0.0381909
x3_hydroxybutyrate_p	pirellula	-0.217806	-0.190594	-0.0948036	-0.0313852
x3_hydroxybutyrate_p	piscirickettsia	-0.157378	-0.140747	-0.211843	-0.170177
x3_hydroxybutyrate_p	planctomyces	-0.0472481	-0.0700198	-0.0839016	0.0204596
x3_hydroxybutyrate_p	planctopirus	0.230644	0.087698	0.173086	0.158855
x3_hydroxybutyrate_p	planktomarina	0.110692	0.188017	0.0709346	0.0949164
x3_hydroxybutyrate_p	planktothrix	0.144432	0.000517057	0.19076	0.217413
x3_hydroxybutyrate_p	planococcus	-0.238755	-0.0198921	-0.178321	-0.177841
x3_hydroxybutyrate_p	plantactinospora	-0.104574	-0.129453	-0.0840937	0.0179048
x3_hydroxybutyrate_p	plantibacter	0.203023	0.124499	0.161512	0.181212
x3_hydroxybutyrate_p	plesiomonas	-0.0766884	0.0312757	-0.252281	-0.171934
x3_hydroxybutyrate_p	pleurocapsa	0.167466	0.308531	0.151763	0.151819
x3_hydroxybutyrate_p	pluralibacter	-0.075435	0.0160168	-0.07713	-0.0442801
x3_hydroxybutyrate_p	polaribacter	0.192194	0.100982	0.232735	0.338008
x3_hydroxybutyrate_p	polaromonas	-0.112165	0.0988624	-0.0929306	0.0104697
x3_hydroxybutyrate_p	polymorphum	0.0634293	-0.0446434	0.0952838	0.0888869
x3_hydroxybutyrate_p	polynucleobacter	-0.283525	-0.0687199	-0.296849	-0.153924
x3_hydroxybutyrate_p	pontibacter	0.0195612	0.0346282	0.108203	0.134377
x3_hydroxybutyrate_p	pontimonas	-0.231242	-0.169167	-0.2287	-0.193234
x3_hydroxybutyrate_p	porphyrobacter	0.197074	-0.0371834	0.233167	0.139951
x3_hydroxybutyrate_p	porphyromonas	0.163369	0.141033	0.156277	0.197435
x3_hydroxybutyrate_p	pragia	-0.0682933	-0.102538	-0.0893766	-0.0431316
x3_hydroxybutyrate_p	prauserella	0.000770922	0.136008	-0.0150802	0.0500723
x3_hydroxybutyrate_p	prevotella	0.0643695	-0.0677957	0.233167	0.225915
x3_hydroxybutyrate_p	prochlorococcus	0.0588879	0.0318629	0.0788109	0.0427923
[truncated: 83,801 more rows]
