# Supplementary material for: Statistical and computational methods for integrating microbiome, host genomics, and metabolomics data
Source: eLife. 2024 Jun 4;13:e88956. doi: 10.7554/eLife.88956 (PMC11149933; doi:10.7554/eLife.88956)
Supplement: Supplementary file 2. — Table of significant HAllA clusters and their associated adjusted p-value. [file elife-88956-supp2.xlsx]

## Sheet: Baseline
cluster_rank	microbe	metabolite	best_adjusted_pvalue
1	asticcacaulis;syntrophomonas;methanofollis;borrelia;blastomonas;haloterrigena	x3a_hydroxy_7_12_diketo_cholanic_acid_ba;x3a_hydroxy_12_ketolithocholic_acid_ba;chenodeoxycholic_acid_cdca_ba;x3_dehydrocholic_acid_ba;cholic_acid_ca_ba	3.6141402399171064e-05
2	thermococcus;catenulispora;faecalibacterium;monoglobus;ruminococcus;eubacterium;faecalibaculum;roseburia;rummeliibacillus	acetate_s;butyrate_s	0.000117565
3	candidatus_promineofilum;novosphingobium;archangium;chlorobaculum;acidipropionibacterium;amycolatopsis;mycobacterium;rhodococcus	x3a_hydroxy_7_12_diketo_cholanic_acid_ba;x3a_hydroxy_12_ketolithocholic_acid_ba;chenodeoxycholic_acid_cdca_ba;x3_dehydrocholic_acid_ba;cholic_acid_ca_ba	0.000117565
4	jatrophihabitans	x3a_hydroxy_7_12_diketo_cholanic_acid_ba;x3a_hydroxy_12_ketolithocholic_acid_ba;chenodeoxycholic_acid_cdca_ba;x3_dehydrocholic_acid_ba;cholic_acid_ca_ba	0.000146659
5	marmoricola	x3a_hydroxy_7_12_diketo_cholanic_acid_ba;x3a_hydroxy_12_ketolithocholic_acid_ba;chenodeoxycholic_acid_cdca_ba;x3_dehydrocholic_acid_ba;cholic_acid_ca_ba	0.000218412
6	actinopolymorpha;moraxella;cloacibacillus;limnochorda;intestinimonas;oscillibacter;thermaerobacter;thermobacillus	x3a_hydroxy_7_12_diketo_cholanic_acid_ba;x3a_hydroxy_12_ketolithocholic_acid_ba;chenodeoxycholic_acid_cdca_ba;x3_dehydrocholic_acid_ba;cholic_acid_ca_ba	0.0003399
7	halodesulfurarchaeum;kutzneria	x3a_hydroxy_7_12_diketo_cholanic_acid_ba;x3a_hydroxy_12_ketolithocholic_acid_ba;chenodeoxycholic_acid_cdca_ba;x3_dehydrocholic_acid_ba;cholic_acid_ca_ba	0.000344692
8	meiothermus;caulobacter;chromobacterium;aeromicrobium;tessaracoccus	allolithocholic_acid_ba;hyodeoxycholic_acid_ba;lithocholenic_acid_ba;x8_14_5b_cholenic_acid_3a_12a_diol_ba;deoxycholic_acid_dca_ba;isolithocholic_acid_ba;lithocholic_acid_ba	0.000344692
9	geitlerinema;thiohalobacter	x3a_hydroxy_7_12_diketo_cholanic_acid_ba;x3a_hydroxy_12_ketolithocholic_acid_ba;chenodeoxycholic_acid_cdca_ba;x3_dehydrocholic_acid_ba;cholic_acid_ca_ba	0.000344692
10	parabacteroides	murocholic_acid_muro_ca_ba;ursodeoxycholic_acid_udca_ba	0.000508696
11	monoglobus;ruminococcus	x3a_hydroxy_12_ketolithocholic_acid_ba;chenodeoxycholic_acid_cdca_ba;x3_dehydrocholic_acid_ba;cholic_acid_ca_ba	0.000508696
12	actinosynnema	x3a_hydroxy_12_ketolithocholic_acid_ba;chenodeoxycholic_acid_cdca_ba;x3_dehydrocholic_acid_ba;cholic_acid_ca_ba	0.000508696
13	agrococcus;neorhizobium;tsukamurella	x3a_hydroxy_12_ketolithocholic_acid_ba;chenodeoxycholic_acid_cdca_ba;x3_dehydrocholic_acid_ba;cholic_acid_ca_ba	0.000508696
14	desulfarculus;methylorubrum	x3a_hydroxy_7_12_diketo_cholanic_acid_ba;x3a_hydroxy_12_ketolithocholic_acid_ba;chenodeoxycholic_acid_cdca_ba;x3_dehydrocholic_acid_ba;cholic_acid_ca_ba	0.000508696
15	thioalkalivibrio;ethanoligenens;streptosporangium	x3a_hydroxy_12_ketolithocholic_acid_ba;chenodeoxycholic_acid_cdca_ba;x3_dehydrocholic_acid_ba;cholic_acid_ca_ba	0.000508696
16	meiothermus;caulobacter;chromobacterium;aeromicrobium;tessaracoccus	x3a_hydroxy_7_12_diketo_cholanic_acid_ba;x3a_hydroxy_12_ketolithocholic_acid_ba;chenodeoxycholic_acid_cdca_ba;x3_dehydrocholic_acid_ba;cholic_acid_ca_ba	0.000508696
17	jannaschia;cnuibacter;salinispora	x3a_hydroxy_12_ketolithocholic_acid_ba;chenodeoxycholic_acid_cdca_ba;x3_dehydrocholic_acid_ba;cholic_acid_ca_ba	0.000967175
18	jiangella;entomoplasma;methanothrix;ketogulonicigenium;marivirga	x3a_hydroxy_12_ketolithocholic_acid_ba;chenodeoxycholic_acid_cdca_ba;x3_dehydrocholic_acid_ba;cholic_acid_ca_ba	0.00102482
19	methylacidiphilum	glycochenodeoxycholic_acid_gcdca_ba;glycocholic_acid_gca_ba;taurochenodeoxycholic_acid_tcdca_ba;tauro_w_muricholic_acid_tw_mca_ba;taurocholic_acid_tca_ba	0.00123344
20	pseudarthrobacter	x3a_hydroxy_12_ketolithocholic_acid_ba;chenodeoxycholic_acid_cdca_ba;x3_dehydrocholic_acid_ba;cholic_acid_ca_ba	0.00128579
21	mycetocola	tauro_w_muricholic_acid_tw_mca_ba;taurocholic_acid_tca_ba	0.00128579
22	marichromatium;alkalilimnicola;nitratifractor;hyphomonas;pararhodospirillum;congregibacter;pseudodesulfovibrio;desulfomicrobium;desulfovibrio;leptospirillum;lawsonia;verrucosispora	tauro_w_muricholic_acid_tw_mca_ba;taurocholic_acid_tca_ba	0.00128579
23	asticcacaulis;syntrophomonas;methanofollis;borrelia;blastomonas;haloterrigena	succinate_s	0.00128579
24	candidatus_promineofilum;novosphingobium;archangium;chlorobaculum;acidipropionibacterium;amycolatopsis;mycobacterium;rhodococcus	allolithocholic_acid_ba	0.00128579
25	confluentimicrobium	butyrate_s	0.00130525
26	candidatus_methanomethylophilus	allolithocholic_acid_ba	0.00151519
27	thioalkalivibrio;ethanoligenens;streptosporangium	taurocholic_acid_tca_ba	0.00154914
28	bdellovibrio;microvirga;pseudarthrobacter;methylomonas;salinibacter;chlorobium;magnetococcus	lithocholenic_acid_ba;x8_14_5b_cholenic_acid_3a_12a_diol_ba;deoxycholic_acid_dca_ba;isolithocholic_acid_ba;lithocholic_acid_ba	0.00162595
29	gemmata;magnetospirillum;nocardiopsis;stigmatella;saccharomonospora;micromonospora;nocardioides;mesorhizobium;frankia;bradyrhizobium;microbacterium	chenodeoxycholic_acid_cdca_ba;x3_dehydrocholic_acid_ba;cholic_acid_ca_ba	0.00162595
30	chondrocystis	butyrate_s	0.00178723
31	nitrobacter;rhodospirillum;agrococcus;neorhizobium;tsukamurella	allolithocholic_acid_ba	0.00178723
32	desulfarculus;methylorubrum	allolithocholic_acid_ba	0.00178723
33	sulfuricaulis;gemmatirosa;melittangium;kocuria;thioalkalivibrio;ethanoligenens;streptosporangium;dietzia;planctomyces	allolithocholic_acid_ba	0.00178723
34	borrelia;blastomonas;haloterrigena	allolithocholic_acid_ba	0.00180033
35	simplicispira	alanine_s	0.00196314
36	granulibacter;cyanobium;symbiobacterium	x3a_hydroxy_7_12_diketo_cholanic_acid_ba;x3a_hydroxy_12_ketolithocholic_acid_ba;chenodeoxycholic_acid_cdca_ba;x3_dehydrocholic_acid_ba;cholic_acid_ca_ba	0.00208359
37	actinopolymorpha	lithocholenic_acid_ba;x8_14_5b_cholenic_acid_3a_12a_diol_ba;deoxycholic_acid_dca_ba;isolithocholic_acid_ba;lithocholic_acid_ba	0.00214411
38	rubrobacter	x3a_hydroxy_12_ketolithocholic_acid_ba;chenodeoxycholic_acid_cdca_ba;x3_dehydrocholic_acid_ba;cholic_acid_ca_ba	0.00249034
39	gordonibacter;aminomonas;candidatus_desulforudis	lithocholenic_acid_ba;x8_14_5b_cholenic_acid_3a_12a_diol_ba;deoxycholic_acid_dca_ba;isolithocholic_acid_ba;lithocholic_acid_ba	0.00257691
40	candidatus_methanomethylophilus;methylosinus;geitlerinema;thiohalobacter;actinopolymorpha;moraxella;cloacibacillus;limnochorda;intestinimonas;oscillibacter;thermaerobacter;thermobacillus;meiothermus;caulobacter;chromobacterium;aeromicrobium;tessaracoccus	taurocholic_acid_tca_ba	0.00262225
41	methylosinus	x3a_hydroxy_7_12_diketo_cholanic_acid_ba;x3a_hydroxy_12_ketolithocholic_acid_ba;chenodeoxycholic_acid_cdca_ba;x3_dehydrocholic_acid_ba;cholic_acid_ca_ba	0.00263911
42	gemmatirosa;melittangium	x3a_hydroxy_7_12_diketo_cholanic_acid_ba;x3a_hydroxy_12_ketolithocholic_acid_ba;chenodeoxycholic_acid_cdca_ba;x3_dehydrocholic_acid_ba;cholic_acid_ca_ba	0.00268644
43	halanaeroarchaeum;marmoricola;renibacterium;thermacetogenium	allolithocholic_acid_ba	0.00286381
44	actinopolymorpha;moraxella;cloacibacillus;limnochorda;intestinimonas;oscillibacter;thermaerobacter;thermobacillus	allolithocholic_acid_ba	0.00286381
45	adlercreutzia;denitrobacterium;libanicoccus;olsenella;slackia	x3a_hydroxy_12_ketolithocholic_acid_ba;chenodeoxycholic_acid_cdca_ba;x3_dehydrocholic_acid_ba;cholic_acid_ca_ba	0.00286381
46	bdellovibrio;microvirga;pseudarthrobacter;methylomonas;salinibacter;chlorobium;magnetococcus	allolithocholic_acid_ba	0.00286799
47	methylomonas	x3a_hydroxy_12_ketolithocholic_acid_ba;chenodeoxycholic_acid_cdca_ba;x3_dehydrocholic_acid_ba;cholic_acid_ca_ba	0.00286799
48	sulfuriferula;methyloceanibacter;limnohabitans;allochromatium;oceanithermus	glutamate_s	0.00286799
49	catenulispora;faecalibacterium	x3a_hydroxy_12_ketolithocholic_acid_ba;chenodeoxycholic_acid_cdca_ba;x3_dehydrocholic_acid_ba;cholic_acid_ca_ba	0.00286799
50	actinopolymorpha	succinate_s	0.00286799
51	halioglobus;sphingorhabdus	allolithocholic_acid_ba;hyodeoxycholic_acid_ba;lithocholenic_acid_ba;x8_14_5b_cholenic_acid_3a_12a_diol_ba;deoxycholic_acid_dca_ba;isolithocholic_acid_ba;lithocholic_acid_ba	0.00290806
52	niveispirillum	x3a_hydroxy_7_12_diketo_cholanic_acid_ba;x3a_hydroxy_12_ketolithocholic_acid_ba;chenodeoxycholic_acid_cdca_ba;x3_dehydrocholic_acid_ba;cholic_acid_ca_ba	0.00290806
53	cloacibacillus;limnochorda;intestinimonas;oscillibacter;thermaerobacter;thermobacillus	lithocholenic_acid_ba	0.00290806
54	dyadobacter	x3a_hydroxy_7_12_diketo_cholanic_acid_ba;x3a_hydroxy_12_ketolithocholic_acid_ba;chenodeoxycholic_acid_cdca_ba;x3_dehydrocholic_acid_ba;cholic_acid_ca_ba	0.00309385
55	beijerinckia;natrialba;roseibacterium	x3a_hydroxy_7_12_diketo_cholanic_acid_ba;x3a_hydroxy_12_ketolithocholic_acid_ba;chenodeoxycholic_acid_cdca_ba;x3_dehydrocholic_acid_ba;cholic_acid_ca_ba	0.00313421
56	jeongeupia;rhodanobacter	x3a_hydroxy_12_ketolithocholic_acid_ba;chenodeoxycholic_acid_cdca_ba;x3_dehydrocholic_acid_ba;cholic_acid_ca_ba	0.00324072
57	microcella	x3a_hydroxy_12_ketolithocholic_acid_ba;chenodeoxycholic_acid_cdca_ba;x3_dehydrocholic_acid_ba;cholic_acid_ca_ba	0.00341393
58	mannheimia	acetate_s	0.00342132
59	bradymonas;sinomonas	allolithocholic_acid_ba	0.00343018
60	frondihabitans;miniimonas;arsenicicoccus;sanguibacter	x3a_hydroxy_12_ketolithocholic_acid_ba;chenodeoxycholic_acid_cdca_ba;x3_dehydrocholic_acid_ba;cholic_acid_ca_ba	0.00343018
61	phenylobacterium;immundisolibacter;xanthobacter	taurocholic_acid_tca_ba	0.00348956
62	phenylobacterium;immundisolibacter;xanthobacter;cystobacter;lacunisphaera;verrucomicrobium;nonomuraea;allokutzneria;coraliomargarita	x3a_hydroxy_12_ketolithocholic_acid_ba;chenodeoxycholic_acid_cdca_ba;x3_dehydrocholic_acid_ba;cholic_acid_ca_ba	0.00356005
63	kocuria	x3a_hydroxy_12_ketolithocholic_acid_ba;chenodeoxycholic_acid_cdca_ba;x3_dehydrocholic_acid_ba;cholic_acid_ca_ba	0.00356005
64	pseudoxanthomonas	chenodeoxycholic_acid_cdca_ba;x3_dehydrocholic_acid_ba;cholic_acid_ca_ba	0.00359579
65	lacinutrix	x3a_hydroxy_7_12_diketo_cholanic_acid_ba;x3a_hydroxy_12_ketolithocholic_acid_ba;chenodeoxycholic_acid_cdca_ba;x3_dehydrocholic_acid_ba;cholic_acid_ca_ba	0.00377823
66	leptothrix	allolithocholic_acid_ba;hyodeoxycholic_acid_ba;lithocholenic_acid_ba;x8_14_5b_cholenic_acid_3a_12a_diol_ba;deoxycholic_acid_dca_ba;isolithocholic_acid_ba;lithocholic_acid_ba	0.00390053
67	intestinimonas;oscillibacter	butyrate_s	0.00394587
68	saccharomonospora	x3a_hydroxy_12_ketolithocholic_acid_ba	0.00395476
69	ensifer;segniliparus	succinate_s	0.00403898
70	chloroherpeton;confluentimicrobium	x3a_hydroxy_12_ketolithocholic_acid_ba;chenodeoxycholic_acid_cdca_ba;x3_dehydrocholic_acid_ba;cholic_acid_ca_ba	0.00403898
71	wolbachia	x3a_hydroxy_12_ketolithocholic_acid_ba;chenodeoxycholic_acid_cdca_ba;x3_dehydrocholic_acid_ba;cholic_acid_ca_ba	0.00407909
72	pseudonocardia;trueperella	x3a_hydroxy_12_ketolithocholic_acid_ba;chenodeoxycholic_acid_cdca_ba;x3_dehydrocholic_acid_ba;cholic_acid_ca_ba	0.00407909
73	halanaeroarchaeum;marmoricola;renibacterium;thermacetogenium	lithocholenic_acid_ba;x8_14_5b_cholenic_acid_3a_12a_diol_ba;deoxycholic_acid_dca_ba;isolithocholic_acid_ba;lithocholic_acid_ba	0.0045581
74	neorhizobium	taurocholic_acid_tca_ba	0.0045581
75	desulfurivibrio;luteibacter	allolithocholic_acid_ba	0.00456645
76	rhodospirillum	lithocholenic_acid_ba;x8_14_5b_cholenic_acid_3a_12a_diol_ba;deoxycholic_acid_dca_ba;isolithocholic_acid_ba;lithocholic_acid_ba	0.00456645
77	sphingorhabdus	chenodeoxycholic_acid_cdca_ba	0.0046407
78	alicyclobacillus	x3a_hydroxy_12_ketolithocholic_acid_ba;chenodeoxycholic_acid_cdca_ba;x3_dehydrocholic_acid_ba;cholic_acid_ca_ba	0.0046407
79	neorickettsia;methanococcus;pasteurella;lysinibacillus;solibacillus	acetate_s	0.00465113
80	sulfuricaulis	tauro_w_muricholic_acid_tw_mca_ba	0.00465878
81	polymorphum	allolithocholic_acid_ba	0.00473756
82	halopiger	x3a_hydroxy_7_12_diketo_cholanic_acid_ba;x3a_hydroxy_12_ketolithocholic_acid_ba;chenodeoxycholic_acid_cdca_ba;x3_dehydrocholic_acid_ba;cholic_acid_ca_ba	0.00477381
83	sagittula	allolithocholic_acid_ba	0.00486698
84	nautilia	acetate_s	0.00492382
85	thermacetogenium	chenodeoxycholic_acid_cdca_ba	0.00492382
86	jatrophihabitans	allolithocholic_acid_ba	0.00492382
87	aminobacter	acetate_s	0.00493796
88	spirochaeta;phaeobacter;porphyrobacter;neisseria;marinobacter;nocardia	chenodeoxycholic_acid_cdca_ba	0.00494134
89	christensenella	taurocholic_acid_tca_ba	0.00494134
90	sediminicola;trichodesmium;olleya;aquiflexum;methanomassiliicoccus;palaeococcus	butyrate_s	0.00502828
91	halopiger	taurocholic_acid_tca_ba	0.00502828
92	jiangella;entomoplasma;methanothrix;ketogulonicigenium;marivirga	allolithocholic_acid_ba	0.00502828
93	frondihabitans	butyrate_s	0.00502828
94	blastomonas	lithocholenic_acid_ba;x8_14_5b_cholenic_acid_3a_12a_diol_ba;deoxycholic_acid_dca_ba;isolithocholic_acid_ba;lithocholic_acid_ba	0.00502828
95	saccharomonospora	allolithocholic_acid_ba	0.00520839
96	siansivirga	lithocholenic_acid_ba;x8_14_5b_cholenic_acid_3a_12a_diol_ba;deoxycholic_acid_dca_ba;isolithocholic_acid_ba;lithocholic_acid_ba	0.00522674
97	rhodospirillum	x3a_hydroxy_12_ketolithocholic_acid_ba;chenodeoxycholic_acid_cdca_ba;x3_dehydrocholic_acid_ba;cholic_acid_ca_ba	0.00528378
98	desulfarculus;methylorubrum	succinate_s	0.00528378
99	oscillibacter	x3_6_diketocholanic_acid_ba	0.00528378
100	methanospirillum	acetate_s;butyrate_s	0.00535721
101	beutenbergia	isodeoxycholic_acid_ba	0.00535721
102	geitlerinema;thiohalobacter	allolithocholic_acid_ba	0.00535721
103	novosphingobium;archangium;chlorobaculum	taurocholic_acid_tca_ba	0.00539489
104	thermobispora	x3a_hydroxy_7_12_diketo_cholanic_acid_ba;x3a_hydroxy_12_ketolithocholic_acid_ba;chenodeoxycholic_acid_cdca_ba;x3_dehydrocholic_acid_ba;cholic_acid_ca_ba	0.00539816
105	rhodoferax	chenodeoxycholic_acid_cdca_ba	0.00543989
106	salinicola;simplicispira	butyrate_s	0.00556247
107	algoriphagus	acetate_s	0.00572044
108	meiothermus;caulobacter;chromobacterium;aeromicrobium;tessaracoccus	x3_6_diketocholanic_acid_ba	0.00572044
109	halanaeroarchaeum;marmoricola	x3_6_diketocholanic_acid_ba	0.0057815
110	bradymonas;sinomonas	x3a_hydroxy_12_ketolithocholic_acid_ba;chenodeoxycholic_acid_cdca_ba;x3_dehydrocholic_acid_ba;cholic_acid_ca_ba	0.00607555
111	paenibacillus	isodeoxycholic_acid_ba	0.00625352
112	halanaeroarchaeum	chenodeoxycholic_acid_cdca_ba	0.0064267
113	methanomassiliicoccus	tauro_w_muricholic_acid_tw_mca_ba	0.00659606
114	methylacidiphilum	x3a_hydroxy_7_12_diketo_cholanic_acid_ba;x3a_hydroxy_12_ketolithocholic_acid_ba;chenodeoxycholic_acid_cdca_ba;x3_dehydrocholic_acid_ba;cholic_acid_ca_ba	0.00659606
115	oceanimonas	hyodeoxycholic_acid_ba;lithocholenic_acid_ba;x8_14_5b_cholenic_acid_3a_12a_diol_ba;deoxycholic_acid_dca_ba;isolithocholic_acid_ba;lithocholic_acid_ba	0.00659606
116	pedobacter	allolithocholic_acid_ba;hyodeoxycholic_acid_ba;lithocholenic_acid_ba;x8_14_5b_cholenic_acid_3a_12a_diol_ba;deoxycholic_acid_dca_ba;isolithocholic_acid_ba;lithocholic_acid_ba	0.00659606
117	salinibacterium	x3a_hydroxy_7_12_diketo_cholanic_acid_ba;x3a_hydroxy_12_ketolithocholic_acid_ba;chenodeoxycholic_acid_cdca_ba;x3_dehydrocholic_acid_ba;cholic_acid_ca_ba	0.00659606
118	leptothrix	chenodeoxycholic_acid_cdca_ba	0.00659606
119	kytococcus	x3a_hydroxy_12_ketolithocholic_acid_ba;chenodeoxycholic_acid_cdca_ba;x3_dehydrocholic_acid_ba;cholic_acid_ca_ba	0.00659606
120	devosia	x3a_hydroxy_7_12_diketo_cholanic_acid_ba;x3a_hydroxy_12_ketolithocholic_acid_ba;chenodeoxycholic_acid_cdca_ba;x3_dehydrocholic_acid_ba;cholic_acid_ca_ba	0.00659606
121	bradymonas;sinomonas	lithocholenic_acid_ba	0.00680773
122	anaerostipes	butyrate_s	0.00680773
123	ezakiella	acetate_s;butyrate_s	0.00685932
124	chthonomonas	tauro_w_muricholic_acid_tw_mca_ba	0.0068952
125	kitasatospora	x3a_hydroxy_12_ketolithocholic_acid_ba;chenodeoxycholic_acid_cdca_ba;x3_dehydrocholic_acid_ba;cholic_acid_ca_ba	0.00706357
126	calditerrivibrio;microbulbifer;oceanimonas	glutamate_s	0.0070919
127	methylosinus	allolithocholic_acid_ba;hyodeoxycholic_acid_ba;lithocholenic_acid_ba;x8_14_5b_cholenic_acid_3a_12a_diol_ba;deoxycholic_acid_dca_ba;isolithocholic_acid_ba;lithocholic_acid_ba	0.00713136
128	methanofollis;borrelia;blastomonas;haloterrigena	butyrate_s	0.00723704
129	jannaschia;cnuibacter;salinispora	lithocholenic_acid_ba;x8_14_5b_cholenic_acid_3a_12a_diol_ba;deoxycholic_acid_dca_ba;isolithocholic_acid_ba;lithocholic_acid_ba	0.0073528
130	akkermansia	histidine_s	0.00739188
131	anabaena	tauro_w_muricholic_acid_tw_mca_ba	0.00739188
132	sagittula	x3a_hydroxy_12_ketolithocholic_acid_ba;chenodeoxycholic_acid_cdca_ba;x3_dehydrocholic_acid_ba;cholic_acid_ca_ba	0.00739188
133	arthrobacter	lithocholenic_acid_ba;x8_14_5b_cholenic_acid_3a_12a_diol_ba;deoxycholic_acid_dca_ba;isolithocholic_acid_ba;lithocholic_acid_ba	0.00741589
134	acidobacterium	allolithocholic_acid_ba;hyodeoxycholic_acid_ba;lithocholenic_acid_ba;x8_14_5b_cholenic_acid_3a_12a_diol_ba;deoxycholic_acid_dca_ba;isolithocholic_acid_ba;lithocholic_acid_ba	0.00749819
135	microcystis	allolithocholic_acid_ba;hyodeoxycholic_acid_ba;lithocholenic_acid_ba;x8_14_5b_cholenic_acid_3a_12a_diol_ba;deoxycholic_acid_dca_ba;isolithocholic_acid_ba;lithocholic_acid_ba	0.00752767
136	neorhizobium	lithocholenic_acid_ba;x8_14_5b_cholenic_acid_3a_12a_diol_ba;deoxycholic_acid_dca_ba;isolithocholic_acid_ba;lithocholic_acid_ba	0.00755487
137	mobiluncus	alanine_s	0.00762613
138	monoglobus;ruminococcus	taurocholic_acid_tca_ba	0.00762613
139	candidatus_pelagibacter	butyrate_s	0.00765073
140	desulfohalobium;desulfobulbus;microterricola	allolithocholic_acid_ba	0.00774823
141	serinicoccus	butyrate_s	0.00774823
142	actinosynnema	taurocholic_acid_tca_ba	0.00774823
143	defluviimonas	x3a_hydroxy_12_ketolithocholic_acid_ba;chenodeoxycholic_acid_cdca_ba;x3_dehydrocholic_acid_ba;cholic_acid_ca_ba	0.00791983
144	escherichia;shigella	butyrate_s	0.00811575
145	arsenicicoccus;sanguibacter	allolithocholic_acid_ba	0.00811575
146	salinibacter	chenodeoxycholic_acid_cdca_ba	0.008194
147	phreatobacter;luteitalea;sandaracinus	tauro_w_muricholic_acid_tw_mca_ba;taurocholic_acid_tca_ba	0.00824066
148	gordonibacter	chenodeoxycholic_acid_cdca_ba;x3_dehydrocholic_acid_ba;cholic_acid_ca_ba	0.00824443
149	candidatus_desulforudis	isodeoxycholic_acid_ba	0.00832565
150	polymorphum	x3a_hydroxy_12_ketolithocholic_acid_ba;chenodeoxycholic_acid_cdca_ba;x3_dehydrocholic_acid_ba;cholic_acid_ca_ba	0.00834522
151	dokdonella	tauro_w_muricholic_acid_tw_mca_ba;taurocholic_acid_tca_ba	0.00846018
152	pseudohongiella	tauro_w_muricholic_acid_tw_mca_ba;taurocholic_acid_tca_ba	0.0085732
153	saccharomonospora;micromonospora;nocardioides;mesorhizobium;frankia;bradyrhizobium;microbacterium	isolithocholic_acid_ba;lithocholic_acid_ba	0.0085732
154	sagittula	tauro_w_muricholic_acid_tw_mca_ba	0.0085732
155	hirschia	x3a_hydroxy_12_ketolithocholic_acid_ba	0.00865138
156	thiodictyon	chenodeoxycholic_acid_cdca_ba	0.00865138
157	haliangium	tauro_w_muricholic_acid_tw_mca_ba	0.00865138
158	candidatus_methanomethylophilus	x3a_hydroxy_7_12_diketo_cholanic_acid_ba;x3a_hydroxy_12_ketolithocholic_acid_ba;chenodeoxycholic_acid_cdca_ba;x3_dehydrocholic_acid_ba;cholic_acid_ca_ba	0.00865138
159	nakamurella	x3a_hydroxy_7_12_diketo_cholanic_acid_ba;x3a_hydroxy_12_ketolithocholic_acid_ba;chenodeoxycholic_acid_cdca_ba;x3_dehydrocholic_acid_ba;cholic_acid_ca_ba	0.00871908
160	methanosphaerula	tauro_w_muricholic_acid_tw_mca_ba	0.00871908
161	geitlerinema;thiohalobacter	tauro_w_muricholic_acid_tw_mca_ba	0.00871908
162	actinosynnema;microcella;pirellula;jannaschia;cnuibacter;salinispora;caldilinea;kytococcus;salinivirga	allolithocholic_acid_ba	0.00873363
163	bartonella;pelodictyon	hyodeoxycholic_acid_ba;lithocholenic_acid_ba;x8_14_5b_cholenic_acid_3a_12a_diol_ba;deoxycholic_acid_dca_ba;isolithocholic_acid_ba;lithocholic_acid_ba	0.00874129
164	fastidiosipila;lacinutrix	butyrate_s	0.00878073
165	jatrophihabitans	succinate_s	0.00878868
166	desulfallas	chenodeoxycholic_acid_cdca_ba	0.00879119
167	ethanoligenens	lithocholenic_acid_ba;x8_14_5b_cholenic_acid_3a_12a_diol_ba;deoxycholic_acid_dca_ba;isolithocholic_acid_ba;lithocholic_acid_ba	0.00884563
168	algibacter	x3a_hydroxy_7_12_diketo_cholanic_acid_ba;x3a_hydroxy_12_ketolithocholic_acid_ba;chenodeoxycholic_acid_cdca_ba;x3_dehydrocholic_acid_ba;cholic_acid_ca_ba	0.00884563
169	entomoplasma;methanothrix	acetate_s;butyrate_s	0.00892246
170	beutenbergia	glutamate_s	0.00893693
171	jannaschia;cnuibacter;salinispora	tauro_w_muricholic_acid_tw_mca_ba;taurocholic_acid_tca_ba	0.00895322
172	archangium	succinate_s	0.00895322
173	wolbachia	tauro_w_muricholic_acid_tw_mca_ba	0.00902799
174	lachnoclostridium	murocholic_acid_muro_ca_ba;ursodeoxycholic_acid_udca_ba	0.00922883
175	marinilactibacillus	glycoursodeoxycholic_acid_gudca_ba	0.00924518
176	chondromyces	x3a_hydroxy_7_12_diketo_cholanic_acid_ba;x3a_hydroxy_12_ketolithocholic_acid_ba;chenodeoxycholic_acid_cdca_ba;x3_dehydrocholic_acid_ba;cholic_acid_ca_ba	0.00941269
177	haliangium	taurocholic_acid_tca_ba	0.00941269
178	prevotella	creatinine_p	0.009465
179	natronococcus	butyrate_s	0.00946581
180	nonomuraea;allokutzneria;coraliomargarita	taurocholic_acid_tca_ba	0.0095799
181	niveispirillum	allolithocholic_acid_ba	0.0095799
182	halopiger	allolithocholic_acid_ba	0.00970459
183	asticcacaulis	lithocholenic_acid_ba;x8_14_5b_cholenic_acid_3a_12a_diol_ba;deoxycholic_acid_dca_ba;isolithocholic_acid_ba;lithocholic_acid_ba	0.00972112
184	luteipulveratus	allolithocholic_acid_ba	0.0098446
185	defluviimonas	butyrate_s	0.00989289
186	rhodobacter	x5b_cholanic_acid_3a_6a_diol_7_one_ba	0.00991887
187	candidatus_sulcia	acetate_s;butyrate_s	0.00991887
188	gordonibacter;aminomonas;candidatus_desulforudis	allolithocholic_acid_ba	0.0099501
189	candidatus_hoaglandella	butyrate_s	0.010044195692116788
190	rufibacter	lithocholenic_acid_ba;x8_14_5b_cholenic_acid_3a_12a_diol_ba;deoxycholic_acid_dca_ba;isolithocholic_acid_ba;lithocholic_acid_ba	0.0100468
191	micromonospora	allolithocholic_acid_ba	0.010102032812381371
192	luteipulveratus	chenodeoxycholic_acid_cdca_ba	0.010155798121364608
193	devosia;mycolicibacterium	allolithocholic_acid_ba	0.010302240538449983
194	lacunisphaera	allolithocholic_acid_ba;hyodeoxycholic_acid_ba;lithocholenic_acid_ba;x8_14_5b_cholenic_acid_3a_12a_diol_ba;deoxycholic_acid_dca_ba;isolithocholic_acid_ba;lithocholic_acid_ba	0.010445561460765569
195	psychrobacter	lithocholenic_acid_ba;x8_14_5b_cholenic_acid_3a_12a_diol_ba;deoxycholic_acid_dca_ba;isolithocholic_acid_ba;lithocholic_acid_ba	0.0106699
196	labrenzia;methanoculleus;haloferax;nitrospirillum;gloeocapsa;mycobacteroides	isolithocholic_acid_ba;lithocholic_acid_ba	0.0106699
197	desulfatibacillum;singulisphaera	allolithocholic_acid_ba	0.0106699
198	thermobaculum	butyrate_s	0.010782361353124888
199	blastochloris	chenodeoxycholic_acid_cdca_ba	0.010930553058553496
200	natrinema	x3a_hydroxy_12_ketolithocholic_acid_ba;chenodeoxycholic_acid_cdca_ba;x3_dehydrocholic_acid_ba;cholic_acid_ca_ba	0.010963580379668164
201	chromohalobacter	allolithocholic_acid_ba	0.010963580379668164
202	thermanaerovibrio;gloeobacter;thermomonospora;beutenbergia;pseudonocardia;trueperella	allolithocholic_acid_ba	0.011012523982389643
203	halotalea	x3a_hydroxy_7_12_diketo_cholanic_acid_ba;x3a_hydroxy_12_ketolithocholic_acid_ba;chenodeoxycholic_acid_cdca_ba;x3_dehydrocholic_acid_ba;cholic_acid_ca_ba	0.011061849353852822
204	geitlerinema;thiohalobacter	succinate_s	0.011061849353852822
205	aeromicrobium;tessaracoccus	succinate_s	0.011061849353852822
206	lysinibacillus	lithocholenic_acid_ba;x8_14_5b_cholenic_acid_3a_12a_diol_ba;deoxycholic_acid_dca_ba;isolithocholic_acid_ba;lithocholic_acid_ba	0.011096023876076595
207	wolbachia	taurocholic_acid_tca_ba	0.011259377645837513
208	archangium;chlorobaculum	tauro_w_muricholic_acid_tw_mca_ba	0.0113183
209	murdochiella	taurocholic_acid_tca_ba	0.011410477444362075
210	spongiibacterium	isolithocholic_acid_ba;lithocholic_acid_ba	0.011454723479231436
211	halopiger	butyrate_s	0.011486686417576119
212	micropruina	chenodeoxycholic_acid_cdca_ba	0.011486686417576119
213	salmonella	butyrate_s	0.011963456069565682
214	methanosarcina	allolithocholic_acid_ba;hyodeoxycholic_acid_ba;lithocholenic_acid_ba;x8_14_5b_cholenic_acid_3a_12a_diol_ba;deoxycholic_acid_dca_ba;isolithocholic_acid_ba;lithocholic_acid_ba	0.0119848
215	thermobispora	deoxycholic_acid_dca_ba;isolithocholic_acid_ba;lithocholic_acid_ba	0.012029914920808413
216	pararhodospirillum	allolithocholic_acid_ba	0.012029914920808413
217	thalassospira	glutamate_s	0.0121496
218	lawsonia;verrucosispora	allolithocholic_acid_ba	0.012209930791799758
219	monoglobus;ruminococcus	x3a_hydroxy_7_12_diketo_cholanic_acid_ba	0.012209930791799758
220	bdellovibrio;microvirga;pseudarthrobacter;methylomonas;salinibacter	x3_6_diketocholanic_acid_ba	0.012318875697941887
221	agromyces	taurocholic_acid_tca_ba	0.012328133303290923
222	micromonospora	lithocholenic_acid_ba;x8_14_5b_cholenic_acid_3a_12a_diol_ba	0.012336069138411017
223	mageeibacillus;mannheimia	butyrate_s	0.012336069138411017
224	novosphingobium	butyrate_s	0.012424068619332037
225	salinicola;simplicispira	x3a_hydroxy_12_ketolithocholic_acid_ba;chenodeoxycholic_acid_cdca_ba;x3_dehydrocholic_acid_ba;cholic_acid_ca_ba	0.012624660381816597
226	granulibacter;cyanobium;symbiobacterium	taurocholic_acid_tca_ba	0.0126632
227	thermincola	chenodeoxycholic_acid_cdca_ba;x3_dehydrocholic_acid_ba;cholic_acid_ca_ba	0.0126632
228	ruminiclostridium	butyrate_s	0.0126632
229	collimonas	glutamate_s	0.0126632
230	fastidiosipila	acetate_s	0.0126632
231	gloeobacter	x3a_hydroxy_12_ketolithocholic_acid_ba	0.0127565
232	aequorivita	acetate_s	0.012763556475669754
233	methyloceanibacter	x3_6_diketocholanic_acid_ba	0.012763556475669754
234	brachybacterium	chenodeoxycholic_acid_cdca_ba	0.012763556475669754
235	intestinimonas;oscillibacter	ursodeoxycholic_acid_udca_ba	0.012763556475669754
236	fibrella;hymenobacter	chenodeoxycholic_acid_cdca_ba	0.012833331822138513
237	methanocella;pyrococcus	allolithocholic_acid_ba	0.012941340446056472
238	serinicoccus	taurocholic_acid_tca_ba	0.012941340446056472
239	mitsuaria	alanine_s	0.012968184480060794
240	faecalibacterium	ursodeoxycholic_acid_udca_ba	0.012999038051019369
241	waddlia	chenodeoxycholic_acid_cdca_ba;x3_dehydrocholic_acid_ba;cholic_acid_ca_ba	0.013068741875974541
242	rhodoferax	allolithocholic_acid_ba	0.013079260913940016
243	thermoanaerobacterium	butyrate_s	0.013221699612357618
244	sulfuricaulis	taurocholic_acid_tca_ba	0.0132245
245	eubacterium;faecalibaculum	x3a_hydroxy_12_ketolithocholic_acid_ba;chenodeoxycholic_acid_cdca_ba;x3_dehydrocholic_acid_ba;cholic_acid_ca_ba	0.0132786
246	adlercreutzia	allolithocholic_acid_ba;hyodeoxycholic_acid_ba;lithocholenic_acid_ba;x8_14_5b_cholenic_acid_3a_12a_diol_ba;deoxycholic_acid_dca_ba;isolithocholic_acid_ba;lithocholic_acid_ba	0.013289085893619606
247	spongiibacterium	x8_14_5b_cholenic_acid_3a_12a_diol_ba	0.013408287993919283
248	histophilus	isodeoxycholic_acid_ba	0.013408287993919283
249	butyrivibrio	acetate_s;butyrate_s	0.013408287993919283
250	flavonifractor	chenodeoxycholic_acid_cdca_ba	0.013462881199142523
251	haloplanus	succinate_s	0.013462881199142523
252	actinoplanes	x3a_hydroxy_12_ketolithocholic_acid_ba;chenodeoxycholic_acid_cdca_ba;x3_dehydrocholic_acid_ba;cholic_acid_ca_ba	0.013462881199142523
253	snodgrassella	tauro_w_muricholic_acid_tw_mca_ba;taurocholic_acid_tca_ba	0.0134649
254	monoglobus;ruminococcus	ursodeoxycholic_acid_udca_ba	0.013475970774911446
255	blastomonas;haloterrigena	tauro_w_muricholic_acid_tw_mca_ba;taurocholic_acid_tca_ba	0.013492433032704022
256	opitutus	x5b_cholanic_acid_3a_6a_diol_7_one_ba	0.013525909346362329
257	neisseria	lithocholenic_acid_ba;x8_14_5b_cholenic_acid_3a_12a_diol_ba;deoxycholic_acid_dca_ba;isolithocholic_acid_ba;lithocholic_acid_ba	0.013579395527760905
258	saccharomonospora	taurochenodeoxycholic_acid_tcdca_ba;tauro_w_muricholic_acid_tw_mca_ba;taurocholic_acid_tca_ba	0.013629026409561653
259	methanocorpusculum	lithocholenic_acid_ba;x8_14_5b_cholenic_acid_3a_12a_diol_ba;deoxycholic_acid_dca_ba;isolithocholic_acid_ba;lithocholic_acid_ba	0.013705903834611512
260	methylomicrobium	alanine_s	0.013736909820612807
261	chelativorans;thermincola;selenomonas;desulfotomaculum;paenibacillus;ruminiclostridium	allolithocholic_acid_ba	0.013736909820612807
262	escherichia;shigella	isolithocholic_acid_ba;lithocholic_acid_ba	0.013750891699185515
263	halodesulfurarchaeum	ursodeoxycholic_acid_udca_ba	0.013750891699185515
264	thermus	allolithocholic_acid_ba;hyodeoxycholic_acid_ba;lithocholenic_acid_ba;x8_14_5b_cholenic_acid_3a_12a_diol_ba;deoxycholic_acid_dca_ba;isolithocholic_acid_ba;lithocholic_acid_ba	0.013750891699185515
265	epibacterium	alanine_s	0.013750891699185515
266	desulfarculus;methylorubrum	x3_6_diketocholanic_acid_ba	0.013750891699185515
267	natrialba	ursodeoxycholic_acid_udca_ba	0.013826391176804053
268	hahella	allolithocholic_acid_ba	0.0138443
269	pseudovibrio	acetate_s	0.0139721
270	endomicrobium	acetate_s	0.014021662852271254
271	sedimenticola	deoxycholic_acid_dca_ba;isolithocholic_acid_ba;lithocholic_acid_ba	0.014021662852271254
272	geitlerinema;thiohalobacter	lithocholenic_acid_ba;x8_14_5b_cholenic_acid_3a_12a_diol_ba;deoxycholic_acid_dca_ba;isolithocholic_acid_ba;lithocholic_acid_ba	0.014059603161213722
273	beutenbergia;pseudonocardia;trueperella	lithocholenic_acid_ba;x8_14_5b_cholenic_acid_3a_12a_diol_ba	0.014064344647273292
274	cyanothece	glutamate_s	0.014107
275	sinorhizobium;vogesella;herbaspirillum;massilia	x5b_cholanic_acid_3a_6a_diol_7_one_ba	0.014212255223112364
276	rubrivivax	x3_6_diketocholanic_acid_ba	0.014241995081692129
277	olsenella	allolithocholic_acid_ba;hyodeoxycholic_acid_ba;lithocholenic_acid_ba;x8_14_5b_cholenic_acid_3a_12a_diol_ba;deoxycholic_acid_dca_ba;isolithocholic_acid_ba;lithocholic_acid_ba	0.014241995081692129
278	cystobacter;lacunisphaera	taurocholic_acid_tca_ba	0.014280734199412878
279	desulfitobacterium;synechococcus	isodeoxycholic_acid_ba	0.014344226951468905
280	borrelia	lithocholenic_acid_ba;x8_14_5b_cholenic_acid_3a_12a_diol_ba;deoxycholic_acid_dca_ba;isolithocholic_acid_ba;lithocholic_acid_ba	0.014462432731437644
281	halalkalicoccus	x3_dehydrocholic_acid_ba;cholic_acid_ca_ba	0.014555135645842616
282	brachybacterium	cholic_acid_ca_ba	0.014698991810125937
283	jeongeupia;rhodanobacter	tauro_w_muricholic_acid_tw_mca_ba;taurocholic_acid_tca_ba	0.014727853150537857
284	ensifer;segniliparus	x3a_hydroxy_12_ketolithocholic_acid_ba;chenodeoxycholic_acid_cdca_ba;x3_dehydrocholic_acid_ba;cholic_acid_ca_ba	0.014727853150537857
285	saccharophagus	taurodeoxycholic_acid_tdca_ba	0.014781184816041945
286	sagittula	lithocholenic_acid_ba;x8_14_5b_cholenic_acid_3a_12a_diol_ba;deoxycholic_acid_dca_ba;isolithocholic_acid_ba;lithocholic_acid_ba	0.014781184816041945
287	nocardioides	taurocholic_acid_tca_ba	0.0148396
288	serinicoccus	x3a_hydroxy_7_12_diketo_cholanic_acid_ba;x3a_hydroxy_12_ketolithocholic_acid_ba;chenodeoxycholic_acid_cdca_ba;x3_dehydrocholic_acid_ba;cholic_acid_ca_ba	0.014867897560035313
289	corallococcus	chenodeoxycholic_acid_cdca_ba;x3_dehydrocholic_acid_ba;cholic_acid_ca_ba	0.0150292
290	gordonibacter	tauro_w_muricholic_acid_tw_mca_ba;taurocholic_acid_tca_ba	0.015117888074002493
291	segniliparus	allolithocholic_acid_ba	0.0151277
292	archangium	lithocholenic_acid_ba	0.0151277
293	sagittula	taurocholic_acid_tca_ba	0.015133970457697292
294	microcella	lithocholenic_acid_ba	0.0151409
295	cystobacter	taurochenodeoxycholic_acid_tcdca_ba	0.015193626329360053
296	methylovorus	glutamate_s	0.0151963
297	methylococcus	x5b_cholanic_acid_3a_6a_diol_7_one_ba	0.015291960902367516
298	haliangium	allolithocholic_acid_ba	0.015451616813411085
299	mitsuaria;sulfurifustis	succinate_s	0.0155861
300	actinopolyspora;tateyamaria;wenzhouxiangella	x3a_hydroxy_12_ketolithocholic_acid_ba	0.015608377340187812
301	hirschia	x3_dehydrocholic_acid_ba	0.015608377340187812
302	ochrobactrum;thiodictyon	deoxycholic_acid_dca_ba;isolithocholic_acid_ba;lithocholic_acid_ba	0.015608377340187812
303	immundisolibacter	hyodeoxycholic_acid_ba;lithocholenic_acid_ba;x8_14_5b_cholenic_acid_3a_12a_diol_ba;deoxycholic_acid_dca_ba;isolithocholic_acid_ba;lithocholic_acid_ba	0.015608377340187812
304	terribacillus	allolithocholic_acid_ba;hyodeoxycholic_acid_ba;lithocholenic_acid_ba;x8_14_5b_cholenic_acid_3a_12a_diol_ba;deoxycholic_acid_dca_ba;isolithocholic_acid_ba;lithocholic_acid_ba	0.015608377340187812
305	tepidanaerobacter;herbivorax;mogibacterium;sporosarcina	acetate_s	0.015608377340187812
306	desulfallas	cholic_acid_ca_ba	0.015609798639792304
307	acidiferrobacter	chenodeoxycholic_acid_cdca_ba	0.015695485218664165
308	marivirga	butyrate_s	0.016060142477520873
309	candidatus_mikella	chenodeoxycholic_acid_cdca_ba;x3_dehydrocholic_acid_ba;cholic_acid_ca_ba	0.016106741317606078
310	corallococcus	allolithocholic_acid_ba	0.016106741317606078
311	frondihabitans	x3a_hydroxy_7_12_diketo_cholanic_acid_ba	0.016106741317606078
312	nakamurella	allolithocholic_acid_ba	0.0161324
313	methylovulum;psychroflexus	allolithocholic_acid_ba;hyodeoxycholic_acid_ba;lithocholenic_acid_ba;x8_14_5b_cholenic_acid_3a_12a_diol_ba;deoxycholic_acid_dca_ba;isolithocholic_acid_ba;lithocholic_acid_ba	0.016146168218865106
314	agromyces	chenodeoxycholic_acid_cdca_ba;x3_dehydrocholic_acid_ba;cholic_acid_ca_ba	0.016146168218865106
315	desulfarculus;methylorubrum	lithocholenic_acid_ba;x8_14_5b_cholenic_acid_3a_12a_diol_ba;deoxycholic_acid_dca_ba;isolithocholic_acid_ba;lithocholic_acid_ba	0.016146168218865106
316	hirschia	cholic_acid_ca_ba	0.016158536199429443
317	thermacetogenium	taurocholic_acid_tca_ba	0.016203302029030822
318	bartonella;pelodictyon	glutamate_s	0.016280956808994662
319	chloroherpeton	alanine_s	0.016353701841729303
320	acidobacterium	chenodeoxycholic_acid_cdca_ba;x3_dehydrocholic_acid_ba;cholic_acid_ca_ba	0.016433416688136773
321	denitrovibrio	butyrate_s	0.016433416688136773
322	curvibacter	x3a_hydroxy_12_ketolithocholic_acid_ba	0.016433416688136773
323	flavonifractor	x3_6_diketocholanic_acid_ba	0.0164944
324	monoglobus;ruminococcus	allolithocholic_acid_ba	0.0164944
325	methanofollis	ursodeoxycholic_acid_udca_ba	0.0164944
326	mucinivorans	chenodeoxycholic_acid_cdca_ba	0.0165107
327	micropruina;brevibacterium;alicyclobacillus;actinoplanes;tumebacillus;clavibacter;curtobacterium	allolithocholic_acid_ba	0.016653806077751306
328	moraxella	acetate_s	0.016653806077751306
329	amycolatopsis	lithocholenic_acid_ba;x8_14_5b_cholenic_acid_3a_12a_diol_ba;deoxycholic_acid_dca_ba;isolithocholic_acid_ba;lithocholic_acid_ba	0.016839810480505035
330	kitasatospora;rhodobaca;moorella;christensenella;dehalobacterium;brachybacterium;dehalobacter;desulfallas	allolithocholic_acid_ba	0.0169809
331	brevirhabdus	x3_6_diketocholanic_acid_ba	0.0169809
332	spongiibacterium	chenodeoxycholic_acid_cdca_ba	0.017011584067673034
333	agrobacterium	chenodeoxycholic_acid_cdca_ba	0.017011584067673034
334	bdellovibrio	chenodeoxycholic_acid_cdca_ba	0.017029396575571665
335	hoyosella	glycodeoxycholic_acid_gdca_ba	0.017101514811547192
336	rhodanobacter	isolithocholic_acid_ba;lithocholic_acid_ba	0.017101514811547192
337	rhodoplanes	x5b_cholanic_acid_3a_6a_diol_7_one_ba	0.017101514811547192
338	denitrovibrio	x3_dehydrocholic_acid_ba;cholic_acid_ca_ba	0.017101514811547192
339	rhodothermus;rufibacter;spirosoma;fibrella;hymenobacter	allolithocholic_acid_ba	0.017118645975262685
340	sphaerochaeta	allolithocholic_acid_ba	0.017502215987296933
341	dokdonella	chenodeoxycholic_acid_cdca_ba;x3_dehydrocholic_acid_ba;cholic_acid_ca_ba	0.017615482836488835
342	thioclava	tauro_w_muricholic_acid_tw_mca_ba	0.017615482836488835
343	fastidiosipila;lacinutrix	alanine_s	0.017676616377053925
344	ruminococcus	tauro_w_muricholic_acid_tw_mca_ba	0.017775305716725642
345	limnochorda	isolithocholic_acid_ba;lithocholic_acid_ba	0.0178048
346	agarivorans	glutamate_s	0.0178244
347	lachnoclostridium	x3a_hydroxy_12_ketolithocholic_acid_ba	0.017875264375314545
348	lawsonella	taurochenodeoxycholic_acid_tcdca_ba	0.017951004527399013
349	oscillibacter	isolithocholic_acid_ba;lithocholic_acid_ba	0.018073420410768214
350	methanohalobium	x3a_hydroxy_12_ketolithocholic_acid_ba	0.018204022198582245
351	agrococcus	taurocholic_acid_tca_ba	0.0182342
352	porphyrobacter	cholic_acid_ca_ba	0.018250558865323823
353	sulfolobus	glycolithocholic_acid_glca_ba	0.018260948982504556
354	vulcanisaeta	acetate_s;butyrate_s	0.0182832
355	plantibacter	allolithocholic_acid_ba	0.0182901
356	methanocorpusculum	x3_6_diketocholanic_acid_ba	0.018331979933307166
357	cyanobium;symbiobacterium	allolithocholic_acid_ba	0.018331979933307166
358	jeotgalicoccus	isolithocholic_acid_ba;lithocholic_acid_ba	0.018331979933307166
359	diaphorobacter	succinate_s	0.018379607520361285
360	micromonospora	taurocholic_acid_tca_ba	0.018379607520361285
361	mitsuaria	cholic_acid_ca_ba	0.0184713
362	anaerolinea	acetate_s;butyrate_s	0.018500773261394272
363	sulfitobacter;desulfurivibrio;luteibacter	chenodeoxycholic_acid_cdca_ba;x3_dehydrocholic_acid_ba;cholic_acid_ca_ba	0.018500773261394272
364	melittangium	taurocholic_acid_tca_ba	0.018500773261394272
365	blastomonas	x3_6_diketocholanic_acid_ba	0.0187005
366	gemmatimonas;nonlabens	isolithocholic_acid_ba;lithocholic_acid_ba	0.018748560449084566
367	rhodoferax;hydrogenophaga;leptothrix	x3_6_diketocholanic_acid_ba	0.018808286541572034
368	thermus;deinococcus;streptomyces;arthrobacter;corynebacterium	chenodeoxycholic_acid_cdca_ba	0.0189265
369	acidiferrobacter	x3_6_diketocholanic_acid_ba	0.018940246820016705
370	selenomonas	isodeoxycholic_acid_ba	0.018940246820016705
371	raoultella	isolithocholic_acid_ba;lithocholic_acid_ba	0.0189407
372	algoriphagus;mucinivorans	allolithocholic_acid_ba	0.019004031966058467
373	spiribacter	chenodeoxycholic_acid_cdca_ba	0.019004031966058467
374	methanoplanus	x3_hydroxybutyrate_p	0.019149192184425342
375	actinopolymorpha	x3_6_diketocholanic_acid_ba	0.0192556
376	christensenella	chenodeoxycholic_acid_cdca_ba	0.019276074909398797
377	archangium	x3_6_diketocholanic_acid_ba	0.019276074909398797
378	hahella	x8_14_5b_cholenic_acid_3a_12a_diol_ba	0.019311163342927894
379	phycisphaera	chenodeoxycholic_acid_cdca_ba	0.019311163342927894
380	aureitalea	x8_14_5b_cholenic_acid_3a_12a_diol_ba	0.0193969
381	nocardia	cholic_acid_ca_ba	0.0198383
382	leisingera	x3a_hydroxy_12_ketolithocholic_acid_ba	0.0198383
383	terribacillus	chenodeoxycholic_acid_cdca_ba;x3_dehydrocholic_acid_ba;cholic_acid_ca_ba	0.0198383
384	oscillibacter	x8_14_5b_cholenic_acid_3a_12a_diol_ba	0.0198383
385	escherichia;shigella	allolithocholic_acid_ba	0.019982358007064695
386	corallococcus	taurocholic_acid_tca_ba	0.019982358007064695
387	leifsonia	chenodeoxycholic_acid_cdca_ba;x3_dehydrocholic_acid_ba;cholic_acid_ca_ba	0.020015176686001272
388	agrobacterium	allolithocholic_acid_ba	0.020288418644873227
389	lachnoclostridium	x3_dehydrocholic_acid_ba;cholic_acid_ca_ba	0.020374044449541034
390	haloarcula	allolithocholic_acid_ba	0.020374044449541034
391	acidobacterium	x5b_cholanic_acid_3a_6a_diol_7_one_ba	0.020536476238733555
392	salinibacterium	taurochenodeoxycholic_acid_tcdca_ba	0.020618669588255274
393	haloplanus;microlunatus	allolithocholic_acid_ba	0.020618669588255274
394	methanothrix	isolithocholic_acid_ba	0.020734842933160347
395	polynucleobacter	glutamate_s	0.0208542
396	desulfurivibrio;luteibacter	taurocholic_acid_tca_ba	0.021069321782463478
397	sulfuricaulis	x3a_hydroxy_7_12_diketo_cholanic_acid_ba;x3a_hydroxy_12_ketolithocholic_acid_ba;chenodeoxycholic_acid_cdca_ba;x3_dehydrocholic_acid_ba;cholic_acid_ca_ba	0.021071513099083165
398	ketogulonicigenium;marivirga	alanine_s	0.021084125338952896
399	arcticibacterium	x8_14_5b_cholenic_acid_3a_12a_diol_ba	0.021135093397832747
400	salinibacterium	taurocholic_acid_tca_ba	0.021135093397832747
401	desulfotomaculum	isodeoxycholic_acid_ba	0.021297002711646685
402	paenibacillus	isolithocholic_acid_ba;lithocholic_acid_ba	0.0214015
403	ethanoligenens	tauro_w_muricholic_acid_tw_mca_ba	0.0214015
404	spongiibacterium	deoxycholic_acid_dca_ba	0.0215316
405	microcoleus	trimethylamine_s	0.0215316
406	rhodoferax	lithocholenic_acid_ba;x8_14_5b_cholenic_acid_3a_12a_diol_ba;deoxycholic_acid_dca_ba;isolithocholic_acid_ba;lithocholic_acid_ba	0.021575487066654724
407	cupriavidus	allolithocholic_acid_ba	0.021582987801450126
408	isosphaera;planctopirus	x3_6_diketocholanic_acid_ba	0.021654
409	paucibacter	butyrate_s	0.021654
410	thiohalobacter	taurochenodeoxycholic_acid_tcdca_ba	0.0216896
411	candidatus_cloacimonas	chenodeoxycholic_acid_cdca_ba;x3_dehydrocholic_acid_ba;cholic_acid_ca_ba	0.021711516619101305
412	rhodanobacter	lithocholenic_acid_ba	0.021752884895448025
413	alkalilimnicola	allolithocholic_acid_ba	0.021752884895448025
414	christensenella	x3a_hydroxy_12_ketolithocholic_acid_ba	0.021752884895448025
415	gemmatimonas;nonlabens	deoxycholic_acid_dca_ba	0.0217853
416	bradymonas	x8_14_5b_cholenic_acid_3a_12a_diol_ba	0.0220331
417	rubinisphaera	isodeoxycholic_acid_ba	0.022127457054189364
418	paludisphaera	allolithocholic_acid_ba	0.022127457054189364
419	salinivirga	lithocholenic_acid_ba;x8_14_5b_cholenic_acid_3a_12a_diol_ba;deoxycholic_acid_dca_ba;isolithocholic_acid_ba;lithocholic_acid_ba	0.022508992138879462
420	nitrosospira;thermosediminibacter	deoxycholic_acid_dca_ba;isolithocholic_acid_ba;lithocholic_acid_ba	0.022508992138879462
421	defluviimonas	allolithocholic_acid_ba	0.022557685013797135
422	gemmatirosa;melittangium	succinate_s	0.022557685013797135
423	ottowia	chenodeoxycholic_acid_cdca_ba	0.022571857827734174
424	coprothermobacter	taurocholic_acid_tca_ba	0.022571857827734174
425	methanohalobium	chenodeoxycholic_acid_cdca_ba	0.022911367623062912
426	candidatus_puniceispirillum	chenodeoxycholic_acid_cdca_ba;x3_dehydrocholic_acid_ba;cholic_acid_ca_ba	0.022913795452725472
427	tistrella	chenodeoxycholic_acid_cdca_ba	0.022956361925565487
428	brachybacterium	lithocholenic_acid_ba;x8_14_5b_cholenic_acid_3a_12a_diol_ba;deoxycholic_acid_dca_ba;isolithocholic_acid_ba;lithocholic_acid_ba	0.022956361925565487
429	marinovum	tauro_w_muricholic_acid_tw_mca_ba	0.022956361925565487
430	epibacterium	butyrate_s	0.0229841
431	arsenicicoccus	butyrate_s	0.0229939
432	pseudanabaena	butyrate_s	0.023160499522410616
433	roseiflexus	allolithocholic_acid_ba	0.0233015
434	aeribacillus	butyrate_s	0.023349506517139344
435	methanothrix	lithocholic_acid_ba	0.023382200709198546
436	frankia;bradyrhizobium;microbacterium	allolithocholic_acid_ba	0.023384532014992642
437	gordonibacter	isodeoxycholic_acid_ba	0.023421935040116592
438	ichthyobacterium	acetate_s;butyrate_s	0.023434682178760192
439	escherichia;shigella	succinate_s	0.023578285435575597
440	fibrella;hymenobacter	x8_14_5b_cholenic_acid_3a_12a_diol_ba	0.023578285435575597
441	thermanaeromonas	isodeoxycholic_acid_ba	0.023578285435575597
442	eubacterium;faecalibaculum	taurocholic_acid_tca_ba	0.023578285435575597
443	thermanaeromonas	allolithocholic_acid_ba	0.023592754586419556
444	luteipulveratus	succinate_s	0.023856665127701022
445	methanococcoides;plantibacter	x3a_hydroxy_12_ketolithocholic_acid_ba	0.023979087234061582
446	jiangella;entomoplasma;methanothrix;ketogulonicigenium;marivirga	ursodeoxycholic_acid_udca_ba	0.0240576
447	thermobacillus	butyrate_s	0.024203054265329902
448	lysinibacillus	allolithocholic_acid_ba	0.024359040161194397
449	desulfallas	x3a_hydroxy_12_ketolithocholic_acid_ba	0.024485090057684355
450	acidothermus	glucose_s	0.0245121
451	chlorobium	x3_6_diketocholanic_acid_ba	0.0245121
452	alicyclobacillus	taurocholic_acid_tca_ba	0.0245121
453	allochromatium	x3_6_diketocholanic_acid_ba	0.0245806
454	polymorphum;rhizorhabdus	tauro_w_muricholic_acid_tw_mca_ba	0.0245806
455	hirschia	taurocholic_acid_tca_ba	0.024617199135364035
456	propionimicrobium	butyrate_s	0.024617199135364035
457	asticcacaulis;syntrophomonas	tauro_w_muricholic_acid_tw_mca_ba;taurocholic_acid_tca_ba	0.024617199135364035
458	halanaerobium	acetate_s	0.024617199135364035
459	rubinisphaera	taurocholic_acid_tca_ba	0.024669351493055842
460	carboxydocella	acetate_s	0.024669351493055842
461	haemophilus	butyrate_s	0.0247023
462	coraliomargarita	glycocholic_acid_gca_ba	0.0247023
463	brachybacterium	x3a_hydroxy_12_ketolithocholic_acid_ba	0.0247023
464	paenibacillus;ruminiclostridium	acetate_s	0.0247023
465	roseovarius	cholic_acid_ca_ba	0.0247023
466	acidipropionibacterium	lithocholenic_acid_ba;x8_14_5b_cholenic_acid_3a_12a_diol_ba;deoxycholic_acid_dca_ba;isolithocholic_acid_ba;lithocholic_acid_ba	0.0247023
467	fimbriimonas	allolithocholic_acid_ba	0.0247023
468	rathayibacter	lactate_p	0.0247023
469	arsenicicoccus	lithocholenic_acid_ba;x8_14_5b_cholenic_acid_3a_12a_diol_ba;deoxycholic_acid_dca_ba;isolithocholic_acid_ba;lithocholic_acid_ba	0.0248333
470	christensenella	cholic_acid_ca_ba	0.024848517061168036
471	methylobacterium;myxococcus	chenodeoxycholic_acid_cdca_ba	0.024944685900830297
472	acidiphilium	x3_6_diketocholanic_acid_ba	0.024944685900830297
473	thermobispora	taurochenodeoxycholic_acid_tcdca_ba	0.0249517
474	escherichia;shigella	chenodeoxycholic_acid_cdca_ba;x3_dehydrocholic_acid_ba;cholic_acid_ca_ba	0.024963472723420872
475	saccharophagus	x8_14_5b_cholenic_acid_3a_12a_diol_ba	0.024963472723420872
476	magnetococcus	acetate_s	0.024963472723420872
477	amycolatopsis	taurocholic_acid_tca_ba	0.024963472723420872
478	ethanoligenens	x3_6_diketocholanic_acid_ba	0.024963472723420872
479	thermanaeromonas	isolithocholic_acid_ba;lithocholic_acid_ba	0.024986323833447035
480	shimwellia	methylamine_s	0.0251217
481	haemophilus	acetate_s	0.0253345
482	mucilaginibacter;filimonas;paludibacter;capnocytophaga;flavobacterium	x8_14_5b_cholenic_acid_3a_12a_diol_ba	0.025406074656351956
483	thermogutta	creatinine_p	0.025406074656351956
484	hirschia	chenodeoxycholic_acid_cdca_ba	0.025406074656351956
485	brucella	taurocholic_acid_tca_ba	0.025487724305253104
486	akkermansia	deoxycholic_acid_dca_ba;isolithocholic_acid_ba;lithocholic_acid_ba	0.025555218989584964
487	rhodanobacter	allolithocholic_acid_ba	0.025555218989584964
488	aquiflexum	acetate_s	0.0256159
489	marichromatium	x3a_hydroxy_12_ketolithocholic_acid_ba	0.0256159
490	cupriavidus	chenodeoxycholic_acid_cdca_ba	0.025640875825176303
491	yangia	allolithocholic_acid_ba	0.025640875825176303
492	blastochloris	x3a_hydroxy_12_ketolithocholic_acid_ba	0.02567
493	arcticibacterium	taurodeoxycholic_acid_tdca_ba	0.025692024750869406
494	pseudohongiella	cholic_acid_ca_ba	0.025692024750869406
495	denitrovibrio	acetate_s	0.025692024750869406
496	mycobacterium	isodeoxycholic_acid_ba	0.025692024750869406
497	cloacibacillus	x3_6_diketocholanic_acid_ba	0.025692024750869406
498	candidatus_midichloria	isodeoxycholic_acid_ba	0.0259622
499	intestinimonas;oscillibacter	acetate_s	0.026098057909334137
500	nitrosospira	allolithocholic_acid_ba	0.026161656014428717
501	candidatus_kuenenia;halomicronema	taurocholic_acid_tca_ba	0.026649730702273104
502	methanocorpusculum	chenodeoxycholic_acid_cdca_ba	0.0267192
503	cystobacter	isolithocholic_acid_ba;lithocholic_acid_ba	0.026724715569893122
504	croceibacter	glutamate_s	0.026728868689892535
505	cellvibrio	glutamate_s	0.026728868689892535
506	tistrella	lithocholenic_acid_ba;x8_14_5b_cholenic_acid_3a_12a_diol_ba;deoxycholic_acid_dca_ba;isolithocholic_acid_ba;lithocholic_acid_ba	0.026728868689892535
507	agrobacterium	glutamate_s	0.026728868689892535
508	methanothrix	tauro_w_muricholic_acid_tw_mca_ba	0.026728868689892535
509	clostridioides	glycoursodeoxycholic_acid_gudca_ba	0.026728868689892535
510	beutenbergia;pseudonocardia;trueperella	x3_6_diketocholanic_acid_ba	0.026728868689892535
511	legionella	lithocholenic_acid_ba;x8_14_5b_cholenic_acid_3a_12a_diol_ba;deoxycholic_acid_dca_ba;isolithocholic_acid_ba;lithocholic_acid_ba	0.026728868689892535
512	flavisolibacter	lithocholenic_acid_ba;x8_14_5b_cholenic_acid_3a_12a_diol_ba;deoxycholic_acid_dca_ba;isolithocholic_acid_ba;lithocholic_acid_ba	0.026757740284692293
513	caldilinea	taurocholic_acid_tca_ba	0.026797070469419187
514	candidatus_endolissoclinum	glucose_s	0.026798572695594266
515	arcticibacterium	deoxycholic_acid_dca_ba	0.026798572695594266
516	nitrobacter;rhodospirillum;agrococcus;neorhizobium;tsukamurella	tauro_w_muricholic_acid_tw_mca_ba	0.026798572695594266
517	amycolatopsis	x3_6_diketocholanic_acid_ba	0.026798572695594266
518	haliangium	succinate_s	0.0268385
519	lysinibacillus;solibacillus	isodeoxycholic_acid_ba	0.0269869
520	chamaesiphon	x8_14_5b_cholenic_acid_3a_12a_diol_ba	0.0269869
521	afipia	x8_14_5b_cholenic_acid_3a_12a_diol_ba	0.0269869
522	olleya	alanine_s	0.0271123
523	fibrella;hymenobacter	deoxycholic_acid_dca_ba;isolithocholic_acid_ba;lithocholic_acid_ba	0.0271123
524	pseudohongiella	chenodeoxycholic_acid_cdca_ba	0.0271123
525	methylomicrobium	cholic_acid_ca_ba	0.0271123
526	propionimicrobium	chenodeoxycholic_acid_cdca_ba	0.0271123
527	roseovarius	chenodeoxycholic_acid_cdca_ba	0.0271123
528	halioglobus	chenodeoxycholic_acid_cdca_ba	0.027206439054805093
529	mesotoga	lithocholenic_acid_ba;x8_14_5b_cholenic_acid_3a_12a_diol_ba;deoxycholic_acid_dca_ba;isolithocholic_acid_ba;lithocholic_acid_ba	0.027206439054805093
530	coriobacterium	alanine_s	0.0272149
531	actinopolymorpha;moraxella	isodeoxycholic_acid_ba	0.0272149
532	escherichia;shigella	lithocholenic_acid_ba	0.027225284279982356
533	catenulispora	lithocholenic_acid_ba	0.027225284279982356
534	rhodobaca	butyrate_s	0.027225284279982356
535	salinivirga	chenodeoxycholic_acid_cdca_ba	0.027225284279982356
536	thermaerobacter	glutamate_s	0.027225284279982356
537	yangia	chenodeoxycholic_acid_cdca_ba	0.027295
538	hahella	succinate_s	0.0273912
539	tistrella	x3_6_diketocholanic_acid_ba	0.027500221157407863
540	corynebacterium	isodeoxycholic_acid_ba	0.027500221157407863
541	chromohalobacter	x3_6_diketocholanic_acid_ba	0.027500221157407863
542	dechloromonas	allolithocholic_acid_ba	0.027500221157407863
543	thermococcus;catenulispora;faecalibacterium	allolithocholic_acid_ba	0.027500221157407863
544	roseburia	x3a_hydroxy_12_ketolithocholic_acid_ba	0.027500221157407863
545	roseovarius	taurocholic_acid_tca_ba	0.027500221157407863
546	chondromyces	taurochenodeoxycholic_acid_tcdca_ba;tauro_w_muricholic_acid_tw_mca_ba;taurocholic_acid_tca_ba	0.027500221157407863
547	acidiphilium	chenodeoxycholic_acid_cdca_ba	0.027500221157407863
548	candidatus_arthromitus;colwellia	acetate_s	0.027500221157407863
549	methanoregula	x8_14_5b_cholenic_acid_3a_12a_diol_ba	0.027650947580675916
550	anaerolinea	cholic_acid_ca_ba	0.027650947580675916
551	geobacter	isolithocholic_acid_ba;lithocholic_acid_ba	0.027650947580675916
552	roseovarius;salinarchaeum	x3a_hydroxy_12_ketolithocholic_acid_ba	0.027650947580675916
553	devosia	x3a_12a_23_nordeoxycholic_acid_ba	0.027650947580675916
554	ethanoligenens;streptosporangium	butyrate_s	0.027650947580675916
555	spongiibacterium	lithocholenic_acid_ba	0.0277365
556	syntrophus	x3a_hydroxy_7_12_diketo_cholanic_acid_ba;x3a_hydroxy_12_ketolithocholic_acid_ba;chenodeoxycholic_acid_cdca_ba;x3_dehydrocholic_acid_ba;cholic_acid_ca_ba	0.0277365
557	buchnera	pyruvate_p	0.0277365
558	chlorobium	chenodeoxycholic_acid_cdca_ba	0.0277746
559	thermobispora	allolithocholic_acid_ba	0.027826662559195248
560	caldilinea	chenodeoxycholic_acid_cdca_ba	0.027826662559195248
561	devosia	butyrate_s	0.027826662559195248
562	pelodictyon	x3_6_diketocholanic_acid_ba	0.027861463281878704
563	methylosinus	succinate_s	0.027861463281878704
564	catenulispora;faecalibacterium	taurocholic_acid_tca_ba	0.027943711449846243
565	maribacter	acetate_s	0.0279973
566	pseudovibrio	x3a_hydroxy_12_ketolithocholic_acid_ba	0.0279973
567	leisingera	cholic_acid_ca_ba	0.027998820629453927
568	erythrobacter	glutamate_s	0.027998820629453927
569	oceanithermus	allolithocholic_acid_ba	0.028061305938186558
570	methanolacinia	deoxycholic_acid_dca_ba	0.028342684171733544
571	halopiger;parvibaculum	x3a_12a_23_nordeoxycholic_acid_ba	0.028342684171733544
572	hoeflea	glucose_s	0.028342684171733544
573	gloeobacter;thermomonospora	tauro_w_muricholic_acid_tw_mca_ba;taurocholic_acid_tca_ba	0.028342684171733544
574	hirschia	acetate_s	0.028487356641123337
575	klebsiella	x3_dehydrocholic_acid_ba;cholic_acid_ca_ba	0.028582267048487323
576	aureitalea	isolithocholic_acid_ba;lithocholic_acid_ba	0.028582267048487323
577	leisingera	chenodeoxycholic_acid_cdca_ba	0.028705262687005528
578	flavobacterium	glutamate_s	0.028746241045235137
579	methanothrix	taurocholic_acid_tca_ba	0.028746241045235137
580	neorhizobium	taurochenodeoxycholic_acid_tcdca_ba	0.028777
581	maricaulis	chenodeoxycholic_acid_cdca_ba;x3_dehydrocholic_acid_ba;cholic_acid_ca_ba	0.0287886
582	chthonomonas	chenodeoxycholic_acid_cdca_ba;x3_dehydrocholic_acid_ba;cholic_acid_ca_ba	0.0288182
583	bradymonas	succinate_s	0.028954823906066917
584	halioglobus;sphingorhabdus	x3_6_diketocholanic_acid_ba	0.029045147278651574
585	dokdonella	isolithocholic_acid_ba;lithocholic_acid_ba	0.029046684327614657
586	dehalobacterium	isodeoxycholic_acid_ba	0.029052127613667277
587	thermosynechococcus	taurochenodeoxycholic_acid_tcdca_ba	0.029060524203831522
588	slackia	allolithocholic_acid_ba	0.0290726
589	blastomonas	ursodeoxycholic_acid_udca_ba	0.0291442
590	salmonella	methylamine_s	0.029309182870179584
591	marinomonas;owenweeksia	x3_6_diketocholanic_acid_ba	0.029309182870179584
592	chloroflexus;parasaccharibacter	x8_14_5b_cholenic_acid_3a_12a_diol_ba	0.029309182870179584
593	bartonella;pelodictyon	chenodeoxycholic_acid_cdca_ba	0.0294023
594	candidatus_doolittlea	isolithocholic_acid_ba;lithocholic_acid_ba	0.029402704088501107
595	thermocrinis	chenodeoxycholic_acid_cdca_ba	0.029402704088501107
596	coraliomargarita	lithocholenic_acid_ba	0.029402704088501107
597	haloplanus	cholic_acid_ca_ba	0.0294175
598	candidatus_desulforudis	chenodeoxycholic_acid_cdca_ba	0.029451720681427065
599	serinicoccus	alanine_s	0.0294738
600	olsenella	alanine_s	0.0295008
601	flavobacterium	isolithocholic_acid_ba;lithocholic_acid_ba	0.029528981747433687
602	microlunatus	isodeoxycholic_acid_ba	0.029689726235393118
603	faecalibaculum	allolithocholic_acid_ba	0.0297091
604	mycobacterium	acetate_s	0.0297091
605	fischerella	isodeoxycholic_acid_ba	0.0297091
606	chelativorans;thermincola	taurocholic_acid_tca_ba	0.029824773914435044
607	coraliomargarita	isolithocholic_acid_ba;lithocholic_acid_ba	0.0299102
608	immundisolibacter	taurochenodeoxycholic_acid_tcdca_ba	0.029953
609	nocardiopsis;stigmatella	taurocholic_acid_tca_ba	0.029983328841837596
610	natranaerobius	x8_14_5b_cholenic_acid_3a_12a_diol_ba	0.029983328841837596
611	saccharopolyspora	allolithocholic_acid_ba	0.030175556490974746
612	bartonella;pelodictyon	glycodeoxycholic_acid_gdca_ba	0.0301864
613	ruminiclostridium	cholic_acid_ca_ba	0.0301864
614	yangia	cholic_acid_ca_ba	0.0301864
615	aureitalea	lithocholenic_acid_ba	0.030200949258816775
616	ruegeria	acetate_s	0.030212300946147644
617	chromohalobacter	chenodeoxycholic_acid_cdca_ba	0.030212300946147644
618	salinivirga	x3_dehydrocholic_acid_ba	0.030212300946147644
619	roseburia	cholic_acid_ca_ba	0.0302283
620	wolbachia	allolithocholic_acid_ba	0.0302283
621	kytococcus	lithocholenic_acid_ba	0.030240604364221543
622	singulisphaera	chenodeoxycholic_acid_cdca_ba;x3_dehydrocholic_acid_ba;cholic_acid_ca_ba	0.030308319228800104
623	janthinobacterium	x5b_cholanic_acid_3a_6a_diol_7_one_ba	0.0303684
624	rhodothermus	chenodeoxycholic_acid_cdca_ba	0.030397024832402655
625	pseudogulbenkiania	alanine_s	0.0304253
626	salinibacterium	allolithocholic_acid_ba	0.030671912803378915
627	lacunisphaera	tauro_w_muricholic_acid_tw_mca_ba	0.030700331995712028
628	frankia	taurocholic_acid_tca_ba	0.0309221
629	deinococcus;streptomyces	allolithocholic_acid_ba	0.030948
630	hyphomonas;pararhodospirillum	succinate_s	0.030948
631	spiribacter	x3a_hydroxy_12_ketolithocholic_acid_ba	0.030948
632	archangium	x3a_12a_23_nordeoxycholic_acid_ba	0.030948
633	acidiferrobacter	cholic_acid_ca_ba	0.030994293734737118
634	eggerthella	valine_s;isoleucine_s;leucine_s	0.030994449907040166
635	thermocrinis	taurocholic_acid_tca_ba	0.030994449907040166
636	marichromatium	butyrate_s	0.030994449907040166
637	bdellovibrio	acetate_s	0.031197730392134092
638	corynebacterium	cholic_acid_ca_ba	0.031197730392134092
639	alistipes	allolithocholic_acid_ba	0.0311985
640	nautilia	allolithocholic_acid_ba	0.0311985
641	haloplanus	taurocholic_acid_tca_ba	0.0311985
642	mitsuaria	butyrate_s	0.0311985
643	rhodospirillum	taurocholic_acid_tca_ba	0.0311985
644	ketogulonicigenium;marivirga	taurocholic_acid_tca_ba	0.0312085
645	wenzhouxiangella	x3_dehydrocholic_acid_ba	0.0313019
646	flammeovirga	x8_14_5b_cholenic_acid_3a_12a_diol_ba	0.031323365385783335
647	streptomyces	isolithocholic_acid_ba;lithocholic_acid_ba	0.031323365385783335
648	christensenella	butyrate_s	0.0314042
649	adlercreutzia	x3_6_diketocholanic_acid_ba	0.0314042
650	thiodictyon	cholic_acid_ca_ba	0.0314071
651	rhodanobacter	butyrate_s	0.0314576
652	methanohalobium	taurocholic_acid_tca_ba	0.0314642
653	brevundimonas	chenodeoxycholic_acid_cdca_ba	0.031638176058389283
654	brachybacterium	x3_dehydrocholic_acid_ba	0.0317823
655	asticcacaulis	x3_6_diketocholanic_acid_ba	0.0318069
656	phycisphaera	x3_dehydrocholic_acid_ba	0.0318652
657	pimelobacter	lithocholenic_acid_ba	0.0318805
658	nonomuraea	allolithocholic_acid_ba	0.0318805
659	micropruina	cholic_acid_ca_ba	0.0318805
660	pseudoxanthomonas	taurocholic_acid_tca_ba	0.0319108
661	candidatus_thioglobus	isolithocholic_acid_ba;lithocholic_acid_ba	0.032015692805031484
662	brevundimonas	cholic_acid_ca_ba	0.032062362586372364
663	gordonibacter	x3_6_diketocholanic_acid_ba	0.032062362586372364
664	natrialba	succinate_s	0.0321372
665	candidatus_midichloria	allolithocholic_acid_ba	0.032143705807966244
666	glaciecola	tauro_w_muricholic_acid_tw_mca_ba	0.0322078
667	nocardia	x3_dehydrocholic_acid_ba	0.0322078
668	dokdonella	allolithocholic_acid_ba	0.0322078
669	candidatus_puniceispirillum	lithocholenic_acid_ba	0.0322078
670	wolbachia	alanine_s	0.0322078
671	acinetobacter	acetate_s	0.0324496
672	methylobacterium	cholic_acid_ca_ba	0.0324538
673	salinicola;simplicispira	taurocholic_acid_tca_ba	0.0325464
674	salinibacterium	lithocholenic_acid_ba	0.0325863
675	desulfallas	x3_dehydrocholic_acid_ba	0.032610769437205124
676	segniliparus	isolithocholic_acid_ba;lithocholic_acid_ba	0.032622944011664906
677	ilyobacter	x8_14_5b_cholenic_acid_3a_12a_diol_ba	0.0326418
678	lentibacillus	hyodeoxycholic_acid_ba	0.0330692
679	picrophilus	glycodeoxycholic_acid_gdca_ba	0.0331362
680	geobacter	chenodeoxycholic_acid_cdca_ba	0.0331376
681	denitrobacterium	tauro_w_muricholic_acid_tw_mca_ba	0.0331376
682	siansivirga	chenodeoxycholic_acid_cdca_ba	0.0331462
683	coriobacterium	butyrate_s	0.033199181712809916
684	siansivirga	allolithocholic_acid_ba	0.0332385
685	lawsonella	chenodeoxycholic_acid_cdca_ba	0.0332385
686	natrinema	taurocholic_acid_tca_ba	0.0332385
687	thermobispora	taurocholic_acid_tca_ba	0.0332385
688	halotalea	allolithocholic_acid_ba	0.0332385
689	methylosinus	butyrate_s	0.0332385
690	denitrovibrio	alanine_s	0.033331782359659994
691	chelativorans	tauro_w_muricholic_acid_tw_mca_ba	0.0333464
692	thermanaeromonas	lithocholenic_acid_ba	0.0333746
693	leifsonia	alanine_s	0.0333746
694	algoriphagus;mucinivorans	x8_14_5b_cholenic_acid_3a_12a_diol_ba	0.0334117
695	diaphorobacter	deoxycholic_acid_dca_ba	0.0334117
696	nonomuraea	lithocholenic_acid_ba;x8_14_5b_cholenic_acid_3a_12a_diol_ba;deoxycholic_acid_dca_ba;isolithocholic_acid_ba;lithocholic_acid_ba	0.0334117
697	hyphomonas;pararhodospirillum	chenodeoxycholic_acid_cdca_ba	0.0334117
698	synechococcus	isolithocholic_acid_ba;lithocholic_acid_ba	0.0334318
699	desulfobulbus	deoxycholic_acid_dca_ba;isolithocholic_acid_ba;lithocholic_acid_ba	0.033467125776033384
700	actinopolyspora;tateyamaria;wenzhouxiangella	x3a_hydroxy_7_12_diketo_cholanic_acid_ba	0.033522833518436206
701	nitrospirillum	deoxycholic_acid_dca_ba	0.033667231659903034
702	porphyrobacter	x3_dehydrocholic_acid_ba	0.033670983405798126
703	mucinivorans	glutamate_s	0.033670983405798126
704	methylovulum	x3_6_diketocholanic_acid_ba	0.0337009
705	moorea	lithocholenic_acid_ba;x8_14_5b_cholenic_acid_3a_12a_diol_ba	0.033892
706	arsenicicoccus	glycodeoxycholic_acid_gdca_ba	0.0339279
707	salinispora	succinate_s	0.0339279
708	halothece	x3_dehydrocholic_acid_ba;cholic_acid_ca_ba	0.0339949
709	polymorphum;rhizorhabdus	succinate_s	0.0339949
710	nocardioides	taurochenodeoxycholic_acid_tcdca_ba	0.0340551
711	melaminivora	glycocholic_acid_gca_ba	0.034067811727428655
712	stappia	chenodeoxycholic_acid_cdca_ba	0.034067811727428655
713	actinopolyspora	x3_dehydrocholic_acid_ba	0.0340841
714	aureitalea	glutamate_s	0.0341857
715	janibacter	allolithocholic_acid_ba	0.0342049
716	lysinibacillus	chenodeoxycholic_acid_cdca_ba	0.0342527
717	melaminivora	tauro_w_muricholic_acid_tw_mca_ba;taurocholic_acid_tca_ba	0.0342527
718	pelagibacterium	isolithocholic_acid_ba;lithocholic_acid_ba	0.0342527
719	ignavibacterium	x3a_hydroxy_12_ketolithocholic_acid_ba	0.034273
720	persicobacter	x8_14_5b_cholenic_acid_3a_12a_diol_ba	0.034273
721	marivivens	butyrate_s	0.0343224
722	gynuella	chenodeoxycholic_acid_cdca_ba	0.0343257
723	vulgatibacter	allolithocholic_acid_ba	0.034433662769367185
724	fastidiosipila	tauro_w_muricholic_acid_tw_mca_ba	0.034462078905867256
725	zobellella	chenodeoxycholic_acid_cdca_ba	0.034465274194101204
726	denitrovibrio	x3a_hydroxy_12_ketolithocholic_acid_ba	0.0344734
727	amycolatopsis	x3a_12a_23_nordeoxycholic_acid_ba	0.034497591623926224
728	paraoerskovia	isodeoxycholic_acid_ba	0.0346199
729	rhodoferax	cholic_acid_ca_ba	0.034655153200969895
730	mogibacterium	x8_14_5b_cholenic_acid_3a_12a_diol_ba	0.034655153200969895
731	dialister	x3a_hydroxy_12_ketolithocholic_acid_ba	0.034671793274704446
732	methanohalophilus	acetoacetate_p	0.034671793274704446
733	spiribacter	alanine_s	0.0347483
734	pelodictyon	allolithocholic_acid_ba	0.0347991
735	halioglobus	isodeoxycholic_acid_ba	0.0347991
736	corallococcus	x3_6_diketocholanic_acid_ba	0.0347991
737	aminobacter	chenodeoxycholic_acid_cdca_ba;x3_dehydrocholic_acid_ba;cholic_acid_ca_ba	0.0347991
738	brachybacterium	taurocholic_acid_tca_ba	0.0347991
739	candidatus_cloacimonas	tauro_w_muricholic_acid_tw_mca_ba	0.0348065
740	ectothiorhodospira;vulgatibacter	chenodeoxycholic_acid_cdca_ba	0.0348589
741	moraxella	butyrate_s	0.0348589
742	hoyosella	hyodeoxycholic_acid_ba	0.034880363698211465
743	salinispira	glutamate_s	0.034880363698211465
744	rhodospirillum	x3_6_diketocholanic_acid_ba	0.034880363698211465
745	labrenzia	x8_14_5b_cholenic_acid_3a_12a_diol_ba	0.0349045
746	enterobacter;raoultella	butyrate_s	0.0349211
747	desulfotomaculum	isolithocholic_acid_ba;lithocholic_acid_ba	0.0349211
748	ruminiclostridium	x3a_hydroxy_12_ketolithocholic_acid_ba	0.0349211
749	candidatus_phycorickettsia	pyruvate_p	0.0349437
750	lawsonella	taurocholic_acid_tca_ba	0.034967512030499796
751	beutenbergia	taurocholic_acid_tca_ba	0.034967512030499796
752	desulfohalobium	hyodeoxycholic_acid_ba	0.034972087492569616
753	mogibacterium	glycodeoxycholic_acid_gdca_ba	0.0350094
754	sphaerochaeta	chenodeoxycholic_acid_cdca_ba	0.0350094
755	zhihengliuella	butyrate_s	0.0350094
756	desulfurispirillum	glucose_s	0.035099
757	rhodothermus;rufibacter	glutamate_s	0.0352834
758	acidiphilium	glutamate_s	0.0353335
759	mycobacterium	succinate_s	0.0353696
760	marmoricola	succinate_s	0.0354347
761	thermacetogenium	cholic_acid_ca_ba	0.0354347
762	lachnoclostridium	tauro_w_muricholic_acid_tw_mca_ba	0.0354595
763	thermacetogenium	isodeoxycholic_acid_ba	0.0355558
764	cupriavidus	x3_6_diketocholanic_acid_ba	0.0355558
765	microcella	isolithocholic_acid_ba;lithocholic_acid_ba	0.0355558
766	mucilaginibacter	glutamate_s	0.0355951
767	rhodothermus	x8_14_5b_cholenic_acid_3a_12a_diol_ba	0.0355951
768	actinotignum	taurocholic_acid_tca_ba	0.0355951
769	propionimicrobium	x3a_hydroxy_12_ketolithocholic_acid_ba	0.0355951
770	alistipes	chenodeoxycholic_acid_cdca_ba	0.0356637
771	erythrobacter	allolithocholic_acid_ba	0.035731
772	desulfofarcimen	isodeoxycholic_acid_ba	0.0357599
773	methanococcoides	cholic_acid_ca_ba	0.0357599
774	halomicronema	chenodeoxycholic_acid_cdca_ba	0.0357599
775	chelativorans	chenodeoxycholic_acid_cdca_ba	0.0357599
776	christensenella	ursodeoxycholic_acid_udca_ba	0.0357599
777	pseudarcicella	allolithocholic_acid_ba	0.0358303
778	sphingorhabdus	x3a_hydroxy_12_ketolithocholic_acid_ba	0.0358303
779	flavobacterium	acetate_s	0.0358303
780	halocynthiibacter	x3_6_diketocholanic_acid_ba	0.0358303
781	friedmanniella	x3_dehydrocholic_acid_ba	0.0358303
782	microlunatus	lithocholenic_acid_ba;x8_14_5b_cholenic_acid_3a_12a_diol_ba	0.0358303
783	microvirgula	tauro_w_muricholic_acid_tw_mca_ba	0.0358303
784	octadecabacter	chenodeoxycholic_acid_cdca_ba	0.0358303
785	neorhizobium	succinate_s	0.0358303
786	mucinivorans	x3_hydroxybutyrate_p	0.035871776739627166
787	coprothermobacter	butyrate_s	0.035871776739627166
788	bartonella	acetate_s	0.0359074
789	jeongeupia	isolithocholic_acid_ba;lithocholic_acid_ba	0.035925795291796535
790	endomicrobium	x8_14_5b_cholenic_acid_3a_12a_diol_ba	0.036019216998171975
791	methanocorpusculum	glutamate_s	0.036019216998171975
792	rubrobacter	taurocholic_acid_tca_ba	0.036052943732673835
793	nitrospirillum	hyodeoxycholic_acid_ba	0.036104310072863965
794	paludisphaera	x3_6_diketocholanic_acid_ba	0.0361612
795	actinomyces	butyrate_s	0.0362051
796	methylophaga	x8_14_5b_cholenic_acid_3a_12a_diol_ba	0.0362051
797	candidatus_puniceispirillum	allolithocholic_acid_ba	0.0362051
798	ruminiclostridium	chenodeoxycholic_acid_cdca_ba	0.0362051
799	frankia	x3a_hydroxy_12_ketolithocholic_acid_ba	0.036368131410716806
800	chloroherpeton	taurocholic_acid_tca_ba	0.0363899
801	methanosalsum	acetate_s	0.0363915
802	ruminiclostridium	taurocholic_acid_tca_ba	0.03642
803	fischerella	x8_14_5b_cholenic_acid_3a_12a_diol_ba	0.0364853
804	halothece	x3a_hydroxy_12_ketolithocholic_acid_ba	0.036535213220769774
805	methanothermobacter	acetate_s	0.036535213220769774
806	yoonia	glutamate_s	0.036535213220769774
807	dyadobacter	x3_hydroxybutyrate_p	0.036535213220769774
808	arthrobacter	allolithocholic_acid_ba	0.036535213220769774
809	chelativorans	cholic_acid_ca_ba	0.036535213220769774
810	thermaerobacter	x3_6_diketocholanic_acid_ba	0.036535213220769774
811	candidatus_mikella	butyrate_s	0.036595305820730235
812	thermogutta	isolithocholic_acid_ba;lithocholic_acid_ba	0.0367965
813	desulfatibacillum;singulisphaera	isolithocholic_acid_ba;lithocholic_acid_ba	0.0367965
814	methanohalobium	cholic_acid_ca_ba	0.0367965
815	siansivirga	x3_6_diketocholanic_acid_ba	0.0368801
816	chroococcidiopsis	x3a_hydroxy_12_ketolithocholic_acid_ba	0.0369478
817	acholeplasma	butyrate_s	0.036978653091192616
818	methylotenera	isolithocholic_acid_ba;lithocholic_acid_ba	0.0369937
819	curtobacterium	isodeoxycholic_acid_ba	0.0369937
820	wolbachia	ursodeoxycholic_acid_udca_ba	0.0369937
821	salinispora	taurochenodeoxycholic_acid_tcdca_ba	0.0369937
822	melittangium	butyrate_s	0.0369937
823	blattabacterium	isolithocholic_acid_ba;lithocholic_acid_ba	0.0369937
824	gloeobacter	chenodeoxycholic_acid_cdca_ba	0.0370626
825	filimonas	deoxycholic_acid_dca_ba	0.037083131983527556
826	methylosinus	alanine_s	0.0373325
827	anaerotignum	allolithocholic_acid_ba	0.037425598614394935
828	coriobacterium	cholic_acid_ca_ba	0.0374494
829	acidipropionibacterium	taurocholic_acid_tca_ba	0.0375267
830	thioalkalivibrio	tauro_w_muricholic_acid_tw_mca_ba	0.0375267
831	halanaeroarchaeum	cholic_acid_ca_ba	0.0375528
832	roseovarius	butyrate_s	0.0375528
833	mordavella	allolithocholic_acid_ba	0.0376813
834	lacinutrix	allolithocholic_acid_ba	0.037733886443373624
835	actinosynnema	taurochenodeoxycholic_acid_tcdca_ba	0.037769216777995884
836	moraxella	isolithocholic_acid_ba;lithocholic_acid_ba	0.037769216777995884
837	ketogulonicigenium	glucose_s	0.0379036
838	vulgatibacter	isolithocholic_acid_ba;lithocholic_acid_ba	0.037985119724381934
839	gemmata	taurocholic_acid_tca_ba	0.037985119724381934
840	nocardia	x3a_hydroxy_12_ketolithocholic_acid_ba	0.038085058447407345
841	moorea	x3a_12a_23_nordeoxycholic_acid_ba	0.038085058447407345
842	microvirgula	succinate_s	0.038089939468512676
843	sphaerochaeta	x3a_hydroxy_12_ketolithocholic_acid_ba	0.038089939468512676
844	microlunatus	chenodeoxycholic_acid_cdca_ba	0.0382155
845	methylacidiphilum	lithocholenic_acid_ba	0.0383049
846	haliangium	chenodeoxycholic_acid_cdca_ba	0.0383049
847	desulfofarcimen	chenodeoxycholic_acid_cdca_ba	0.0383127
848	brevibacterium	isodeoxycholic_acid_ba	0.0383127
849	cupriavidus	glutamate_s	0.0383127
850	plantibacter	chenodeoxycholic_acid_cdca_ba	0.0384395
851	syntrophobotulus	x3_6_diketocholanic_acid_ba	0.0384395
852	gemmata	x5b_cholanic_acid_3a_6a_diol_7_one_ba	0.0384486
853	oscillibacter	deoxycholic_acid_dca_ba	0.0384512
854	sphaerochaeta	acetate_s	0.038452944819184286
855	acidiphilium	allolithocholic_acid_ba	0.0385436
856	ketogulonicigenium	isolithocholic_acid_ba	0.0385951
857	halobacterium	x3a_hydroxy_12_ketolithocholic_acid_ba	0.038643666711744074
858	micropruina	taurocholic_acid_tca_ba	0.0386654
859	gillisia	x3a_hydroxy_12_ketolithocholic_acid_ba	0.038764621434388705
860	mycobacteroides	acetate_s	0.0387989
861	roseovarius	tauro_w_muricholic_acid_tw_mca_ba	0.0388728
862	kocuria	isolithocholic_acid_ba;lithocholic_acid_ba	0.0389054
863	hoeflea	x3a_hydroxy_12_ketolithocholic_acid_ba	0.0390091
864	candidatus_puniceispirillum	isolithocholic_acid_ba;lithocholic_acid_ba	0.0390091
865	mycobacterium	butyrate_s	0.0390486
866	moorella	chenodeoxycholic_acid_cdca_ba	0.0392413
867	jonquetella	isodeoxycholic_acid_ba	0.039288882279981466
868	actinotignum	chenodeoxycholic_acid_cdca_ba	0.039288882279981466
869	serinicoccus	tauro_w_muricholic_acid_tw_mca_ba	0.039288882279981466
870	acidiphilium	cholic_acid_ca_ba	0.039288882279981466
871	oceanobacillus	acetate_s	0.039288882279981466
872	fastidiosipila	x3_dehydrocholic_acid_ba	0.039288882279981466
873	tessaracoccus	alanine_s	0.0393184
874	agarilytica	taurocholic_acid_tca_ba	0.0394386
875	rhizorhabdus	chenodeoxycholic_acid_cdca_ba	0.0394552
876	anaplasma	tauro_w_muricholic_acid_tw_mca_ba	0.0395491
877	nonlabens	x8_14_5b_cholenic_acid_3a_12a_diol_ba	0.0395491
878	gillisia	x3_dehydrocholic_acid_ba;cholic_acid_ca_ba	0.0396499
879	actinosynnema	lithocholenic_acid_ba	0.039661
880	melioribacter	acetate_s	0.0396653
881	ammonifex	x3a_hydroxy_12_ketolithocholic_acid_ba	0.0397278
882	methanomassiliicoccus	cholic_acid_ca_ba	0.039731210279146625
883	anaerococcus	glycoursodeoxycholic_acid_gudca_ba	0.039781586663442677
884	meiothermus	glutamate_s	0.039841099719660995
885	devosia	succinate_s	0.0399527
886	ilyobacter	isolithocholic_acid_ba;lithocholic_acid_ba	0.0399527
887	thermogutta	x8_14_5b_cholenic_acid_3a_12a_diol_ba	0.040082883236914134
888	thermus	isodeoxycholic_acid_ba	0.040082883236914134
889	wolbachia	succinate_s	0.040082883236914134
890	thermocrinis	allolithocholic_acid_ba	0.040136
891	thauera	glucose_s	0.0401762
892	chloroflexus;parasaccharibacter	isolithocholic_acid_ba;lithocholic_acid_ba	0.040241
893	methylocystis	glucose_s	0.040408
894	sulfitobacter	x3_6_diketocholanic_acid_ba	0.040449011630277164
895	singulisphaera	taurocholic_acid_tca_ba	0.0404642
896	ketogulonicigenium	lithocholic_acid_ba	0.0404642
897	lacimicrobium	acetate_s	0.0405016
898	geitlerinema	ursodeoxycholic_acid_udca_ba	0.0406047
899	jatrophihabitans	isolithocholic_acid_ba;lithocholic_acid_ba	0.0406139
900	aurantimicrobium	alanine_s	0.0406143
901	chitinophaga	isolithocholic_acid_ba;lithocholic_acid_ba	0.0406268
902	porphyrobacter	x3a_hydroxy_12_ketolithocholic_acid_ba	0.0406824
903	thermococcus	chenodeoxycholic_acid_cdca_ba	0.0407254
904	pseudovibrio	chenodeoxycholic_acid_cdca_ba	0.0408079
905	dermabacter	isodeoxycholic_acid_ba	0.040836331713075914
906	anabaena	x3_dehydrocholic_acid_ba;cholic_acid_ca_ba	0.040901
907	zobellia	x8_14_5b_cholenic_acid_3a_12a_diol_ba	0.040901
908	halodesulfurarchaeum	aspartate_s	0.040901
909	cloacibacillus;limnochorda	x8_14_5b_cholenic_acid_3a_12a_diol_ba	0.040901
910	luteipulveratus	x3a_hydroxy_12_ketolithocholic_acid_ba	0.0409158
911	rhizorhabdus	cholic_acid_ca_ba	0.040924358504847255
912	salinivirga	glutamate_s	0.0409575
913	thermanaeromonas	taurocholic_acid_tca_ba	0.041135874604400276
914	dyadobacter	succinate_s	0.041181
915	salinivirga	acetate_s	0.0413508
916	leptothrix	succinate_s	0.0414355
917	rhizobium	glutamate_s	0.041692439243061555
918	halobacillus	allolithocholic_acid_ba	0.041720957336736676
919	thermocrinis	taurochenodeoxycholic_acid_tcdca_ba	0.041720957336736676
920	micromonospora	deoxycholic_acid_dca_ba	0.0419709
921	isosphaera	x5b_cholanic_acid_3a_6a_diol_7_one_ba	0.0421863
922	rothia	cholic_acid_ca_ba	0.0422685
923	mycobacterium	taurocholic_acid_tca_ba	0.0422685
924	methanothrix	lithocholenic_acid_ba	0.0422723
925	syntrophobotulus	glutamate_s	0.0422723
926	aminobacterium	hyodeoxycholic_acid_ba	0.0422794
927	melittangium	tauro_w_muricholic_acid_tw_mca_ba	0.042328947545794915
928	planctopirus	deoxycholic_acid_dca_ba	0.0423365
929	methylomonas	aspartate_s	0.0423365
930	oscillibacter	glutamate_s	0.0423365
931	hirschia	x3a_hydroxy_7_12_diketo_cholanic_acid_ba	0.0423444
932	rhodopseudomonas	allolithocholic_acid_ba	0.0423444
933	dyadobacter	taurocholic_acid_tca_ba	0.042428742449815815
934	anaerolinea	chenodeoxycholic_acid_cdca_ba	0.042428742449815815
935	salinivirga	tauro_w_muricholic_acid_tw_mca_ba	0.0427869
936	desulfurivibrio	glutamate_s	0.0427907
937	amycolatopsis	glutamate_s	0.0427907
938	candidatus_pelagibacter	alanine_s	0.0429614
939	stappia	x3a_hydroxy_12_ketolithocholic_acid_ba	0.0430673
940	polaribacter	lithocholenic_acid_ba;x8_14_5b_cholenic_acid_3a_12a_diol_ba;deoxycholic_acid_dca_ba;isolithocholic_acid_ba;lithocholic_acid_ba	0.043083236261143736
941	pseudonocardia	isolithocholic_acid_ba;lithocholic_acid_ba	0.0430929
942	halomicronema	allolithocholic_acid_ba	0.043133025916278815
943	thermodesulfovibrio	glutamine_s	0.0431391
944	conexibacter;granulicella	allolithocholic_acid_ba	0.0431539
945	intestinimonas	succinate_s	0.043226830352404245
946	frischella	taurocholic_acid_tca_ba	0.043226830352404245
947	curvibacter	butyrate_s	0.043226830352404245
948	brucella	cholic_acid_ca_ba	0.0432813
949	wenzhouxiangella	butyrate_s	0.0433107
950	isosphaera	taurocholic_acid_tca_ba	0.0433108
951	corynebacterium	isolithocholic_acid_ba;lithocholic_acid_ba	0.0433108
952	paludisphaera	chenodeoxycholic_acid_cdca_ba	0.0434222
953	rhodoferax	x3a_hydroxy_12_ketolithocholic_acid_ba	0.0434222
954	kocuria	x3_6_diketocholanic_acid_ba	0.0434353
955	enterobacter	cholic_acid_ca_ba	0.0435116
956	desulfococcus	x5b_cholanic_acid_3a_6a_diol_7_one_ba	0.0435116
957	rhizobium	isolithocholic_acid_ba;lithocholic_acid_ba	0.0435116
958	ottowia	cholic_acid_ca_ba	0.0435116
959	magnetospirillum	allolithocholic_acid_ba	0.0435116
960	methylotenera	taurodeoxycholic_acid_tdca_ba	0.0435341
961	xylella	alanine_s	0.0436844
962	halodesulfurarchaeum	x3_6_diketocholanic_acid_ba	0.0436844
963	mageeibacillus	alanine_s	0.0436844
964	salinispora	x3_6_diketocholanic_acid_ba	0.0436844
965	halalkalicoccus	alanine_s	0.0437094
966	thermovirga	x3a_hydroxy_12_ketolithocholic_acid_ba	0.0437294
967	raoultella	lithocholenic_acid_ba	0.043741063551238836
968	chondrocystis	x3a_hydroxy_7_12_diketo_cholanic_acid_ba	0.043741063551238836
969	pseudoxanthomonas	allolithocholic_acid_ba	0.0437603
970	ectothiorhodospira	cholic_acid_ca_ba	0.043957125240139006
971	stigmatella	x3a_hydroxy_12_ketolithocholic_acid_ba	0.043957125240139006
972	pseudarthrobacter	succinate_s	0.043961170479083655
973	trueperella	taurocholic_acid_tca_ba	0.044094034620515886
974	microvirgula	x3_dehydrocholic_acid_ba	0.0442062
975	micropruina	x3a_hydroxy_12_ketolithocholic_acid_ba	0.044325469405904275
976	rothia	chenodeoxycholic_acid_cdca_ba	0.044393
977	spiribacter	cholic_acid_ca_ba	0.0444068
978	paenibacillus	lithocholenic_acid_ba;x8_14_5b_cholenic_acid_3a_12a_diol_ba	0.0444068
979	thermosulfidibacter	butyrate_s	0.0444073
980	cyclobacterium	butyrate_s	0.0444874
981	sulfurifustis	cholic_acid_ca_ba	0.044604
982	haloarcula	chenodeoxycholic_acid_cdca_ba	0.044698803553108735
983	prochlorococcus	isolithocholic_acid_ba;lithocholic_acid_ba	0.0447022
984	candidatus_ishikawaella	x3_hydroxyisovalerate_p	0.0447161
985	ignavibacterium	x3_dehydrocholic_acid_ba	0.0447161
986	melaminivora	succinate_s	0.0447161
987	thiodictyon	x3a_hydroxy_12_ketolithocholic_acid_ba	0.0447161
988	blastomonas	x3a_12a_23_nordeoxycholic_acid_ba	0.0447161
989	blattabacterium	x8_14_5b_cholenic_acid_3a_12a_diol_ba	0.0447161
990	anabaena	taurocholic_acid_tca_ba	0.044803948746618825
991	thermincola	succinate_s	0.0448479
992	methylovulum	glutamate_s	0.0448853
993	listeria	isolithocholic_acid_ba;lithocholic_acid_ba	0.0449476
994	dialister	chenodeoxycholic_acid_cdca_ba	0.045076577762900284
995	allochromatium	x8_14_5b_cholenic_acid_3a_12a_diol_ba	0.0450809
996	sphaerobacter	isolithocholic_acid_ba;lithocholic_acid_ba	0.0451985
997	rhodoferax	succinate_s	0.0452351
998	planctopirus	lithocholenic_acid_ba	0.045498
999	melittangium	alanine_s	0.0455239
1000	cloacibacillus	acetate_s	0.0455239
1001	luteitalea;sandaracinus	succinate_s	0.045545
1002	myxococcus	taurocholic_acid_tca_ba	0.0456036
1003	phenylobacterium	tauro_w_muricholic_acid_tw_mca_ba	0.0456036
1004	simplicispira	succinate_s	0.0456036
1005	bradymonas	taurocholic_acid_tca_ba	0.0456223
1006	halothermothrix	allolithocholic_acid_ba	0.045755
1007	roseburia	chenodeoxycholic_acid_cdca_ba	0.0457734
1008	sinomonas	glutamate_s	0.045891368587712915
1009	christensenella	acetate_s	0.045891368587712915
1010	curtobacterium	glycodeoxycholic_acid_gdca_ba	0.0458925
1011	jeotgalicoccus	lithocholenic_acid_ba	0.0458925
1012	jeotgalibacillus	alanine_p	0.0459782
1013	nonlabens	acetate_s	0.0460795
1014	methanosphaerula	x3a_hydroxy_12_ketolithocholic_acid_ba	0.0460795
1015	neorickettsia	x8_14_5b_cholenic_acid_3a_12a_diol_ba	0.0461153
1016	ketogulonicigenium	lithocholenic_acid_ba	0.0461153
1017	syntrophobotulus	allolithocholic_acid_ba	0.0461153
1018	methylocella	alanine_s	0.0463253
1019	bradyrhizobium	x3a_hydroxy_12_ketolithocholic_acid_ba	0.046473
1020	oenococcus	butyrate_s	0.0464952
1021	thermincola	isolithocholic_acid_ba	0.0465101
1022	spirochaeta	cholic_acid_ca_ba	0.046609888046416345
1023	kitasatospora	alanine_s	0.046609888046416345
1024	mucinivorans	lithocholenic_acid_ba	0.0466307
1025	sediminispirochaeta	x8_14_5b_cholenic_acid_3a_12a_diol_ba	0.046720304103102045
1026	orrella	allolithocholic_acid_ba	0.0467639
1027	haematospirillum	allolithocholic_acid_ba	0.0468648
1028	pseudopropionibacterium	isolithocholic_acid_ba;lithocholic_acid_ba	0.0470086
1029	candidatus_promineofilum	butyrate_s	0.0470272
1030	murdochiella	glycocholic_acid_gca_ba	0.047085304247206985
1031	desulfofarcimen	x3a_hydroxy_12_ketolithocholic_acid_ba	0.0471137
1032	paracoccus	x5b_cholanic_acid_3a_6a_diol_7_one_ba	0.047114597313082894
1033	microcella	x8_14_5b_cholenic_acid_3a_12a_diol_ba	0.0471798
1034	teredinibacter	glutamine_s	0.047199
1035	candidatus_solibacter	cholic_acid_ca_ba	0.047199
1036	brachybacterium	alanine_s	0.047199
1037	candidatus_cloacimonas	succinate_s	0.0473033
1038	paenibacillus	chenodeoxycholic_acid_cdca_ba	0.0473033
1039	brevefilum	butyrate_s	0.047325145253761726
1040	sediminispirochaeta	isodeoxycholic_acid_ba	0.0473398
1041	sulfurifustis	chenodeoxycholic_acid_cdca_ba	0.0473398
1042	halodesulfurarchaeum	lithocholenic_acid_ba	0.0473703
1043	thermovirga	chenodeoxycholic_acid_cdca_ba	0.0474026
1044	chloracidobacterium	butyrate_s	0.0474026
1045	aneurinibacillus	x8_14_5b_cholenic_acid_3a_12a_diol_ba	0.0474026
1046	chitinophaga	x8_14_5b_cholenic_acid_3a_12a_diol_ba	0.0474905
1047	pelosinus	hyodeoxycholic_acid_ba	0.0474989
1048	leptothrix	x3a_12a_23_nordeoxycholic_acid_ba	0.0475067
1049	limnochorda	succinate_s	0.0476162
1050	negativicoccus	x3_hydroxyisovalerate_p	0.0476637
1051	coraliomargarita	taurochenodeoxycholic_acid_tcdca_ba	0.0476637
1052	desulfallas	taurocholic_acid_tca_ba	0.047738131911290185
1053	desulfotalea	alanine_s	0.0478062
1054	porphyrobacter	isolithocholic_acid_ba	0.0478187
1055	desulfurivibrio	lithocholenic_acid_ba	0.0478343
1056	aneurinibacillus	isolithocholic_acid_ba	0.0478343
1057	rickettsia	butyrate_s	0.0478343
1058	phycisphaera	isolithocholic_acid_ba	0.047898376424307096
1059	octadecabacter	taurocholic_acid_tca_ba	0.047898376424307096
1060	mycobacterium	alanine_s	0.047898376424307096
1061	pedobacter	acetate_s	0.0479107
1062	natranaerobius	isolithocholic_acid_ba	0.0479107
1063	geosporobacter	glycoursodeoxycholic_acid_gudca_ba	0.0479107
1064	agromyces	allolithocholic_acid_ba	0.0479194
1065	gemmata	allolithocholic_acid_ba	0.047957718732916585
1066	isoptericola	histidine_s	0.0480109
1067	aliivibrio	acetate_s	0.048087811296102824
1068	porphyromonas	chenodeoxycholic_acid_cdca_ba	0.0481014
1069	desulfatibacillum	chenodeoxycholic_acid_cdca_ba	0.0481014
1070	jiangella	glycoursodeoxycholic_acid_gudca_ba	0.0481014
1071	bernardetia	acetate_s	0.0481298
1072	draconibacterium	acetate_s	0.0481298
1073	flavonifractor	glycoursodeoxycholic_acid_gudca_ba	0.0481298
1074	hirschia	glutamate_s	0.0481298
1075	stigmatella	allolithocholic_acid_ba	0.0481298
1076	thermosediminibacter	lithocholenic_acid_ba	0.0482435
1077	thermocrinis	x3a_hydroxy_12_ketolithocholic_acid_ba	0.048327718776841805
1078	bacteriovorax	allolithocholic_acid_ba	0.048327718776841805
1079	aneurinibacillus	deoxycholic_acid_dca_ba	0.0485014
1080	desulfurivibrio	x3_6_diketocholanic_acid_ba	0.0485379
1081	cloacibacillus	alanine_s	0.0486163
1082	desulfallas	ursodeoxycholic_acid_udca_ba	0.0486709
1083	meiothermus	glycodeoxycholic_acid_gdca_ba	0.048825292331910373
1084	curvibacter	cholic_acid_ca_ba	0.048905728863277875
1085	microbulbifer	x8_14_5b_cholenic_acid_3a_12a_diol_ba	0.048952915753313384
1086	rubrivivax	glutamate_s	0.0489552
1087	olsenella	butyrate_s	0.0489552
1088	zymomonas	taurocholic_acid_tca_ba	0.0490554
1089	halobiforma	acetate_s	0.0490818
1090	saccharomonospora	lithocholenic_acid_ba	0.0490818
1091	jeongeupia	lithocholenic_acid_ba	0.0491779
1092	devosia	taurocholic_acid_tca_ba	0.0492604
1093	actinosynnema	ursodeoxycholic_acid_udca_ba	0.049307
1094	tatumella	taurolithocholic_acid_tlca_ba	0.0493649
1095	akkermansia	hyodeoxycholic_acid_ba	0.0493649
1096	renibacterium	x3a_12a_23_nordeoxycholic_acid_ba	0.0493649
1097	neisseria	allolithocholic_acid_ba	0.0493649
1098	nocardia	isolithocholic_acid_ba	0.0493649
1099	jeotgalicoccus	glycodeoxycholic_acid_gdca_ba	0.0493649
1100	ruminococcus	alanine_s	0.0493649
1101	desulfallas	deoxycholic_acid_dca_ba	0.0493649
1102	salinicola	tauro_w_muricholic_acid_tw_mca_ba	0.0493649
1103	sideroxydans	chenodeoxycholic_acid_cdca_ba	0.0493649
1104	microcella	x3_6_diketocholanic_acid_ba	0.0493649
1105	limnobaculum	alanine_s	0.0494111
1106	opitutus	tauro_w_muricholic_acid_tw_mca_ba	0.0494111
1107	hahella	lithocholenic_acid_ba	0.0494413
1108	filimonas	isolithocholic_acid_ba	0.0495364
1109	agromyces	isolithocholic_acid_ba	0.0495508
1110	filimonas	allolithocholic_acid_ba	0.049626474367028696
1111	paenibacillus	deoxycholic_acid_dca_ba	0.0496389
1112	methanosphaerula	cholic_acid_ca_ba	0.049680301556004065
1113	anaerotignum	x3_6_diketocholanic_acid_ba	0.049685987875803576
1114	solibacillus	isolithocholic_acid_ba	0.049741325742134745
1115	candidatus_tachikawaea	tyrosine_p	0.0497716
1116	thermincola	x8_14_5b_cholenic_acid_3a_12a_diol_ba	0.0497716
1117	chitinophaga	allolithocholic_acid_ba	0.0498007
1118	microlunatus	x3_6_diketocholanic_acid_ba	0.0498256
1119	moorella	cholic_acid_ca_ba	0.0498318
1120	phaeobacter	acetate_s	0.049947399293692775
1121	saccharothrix	glutamate_s	0.049995

## Sheet: Week 6
cluster_rank	microbe	metabolite	best_adjusted_pvalue
1	porphyrobacter;allokutzneria;microcella	trimethylamine_s;glycoursodeoxycholic_acid_gudca_ba;glycochenodeoxycholic_acid_gcdca_ba;glycocholic_acid_gca_ba;tauro_w_muricholic_acid_tw_mca_ba;taurochenodeoxycholic_acid_tcdca_ba;taurocholic_acid_tca_ba;succinate_s;murocholic_acid_muro_ca_ba;ursodeoxycholic_acid_udca_ba;x3a_hydroxy_7_12_diketo_cholanic_acid_ba;x3a_hydroxy_12_ketolithocholic_acid_ba;x3_dehydrocholic_acid_ba;chenodeoxycholic_aci…	4.871697658440361e-06
2	brevundimonas;intestinimonas	x5b_cholanic_acid_3b_12a_diol_ba;trimethylamine_s;glycoursodeoxycholic_acid_gudca_ba;glycochenodeoxycholic_acid_gcdca_ba;glycocholic_acid_gca_ba;tauro_w_muricholic_acid_tw_mca_ba;taurochenodeoxycholic_acid_tcdca_ba;taurocholic_acid_tca_ba;succinate_s;murocholic_acid_muro_ca_ba;ursodeoxycholic_acid_udca_ba;x3a_hydroxy_7_12_diketo_cholanic_acid_ba;x3a_hydroxy_12_ketolithocholic_acid_ba;x3_dehydroch…	1.7900032543419126e-05
3	kocuria;pseudonocardia;rubrobacter;phenylobacterium;streptosporangium;immundisolibacter;slackia;thermobacillus;cyanobium;symbiobacterium;oscillibacter;thermaerobacter	trimethylamine_s;glycoursodeoxycholic_acid_gudca_ba;glycochenodeoxycholic_acid_gcdca_ba;glycocholic_acid_gca_ba;tauro_w_muricholic_acid_tw_mca_ba;taurochenodeoxycholic_acid_tcdca_ba;taurocholic_acid_tca_ba;succinate_s;murocholic_acid_muro_ca_ba;ursodeoxycholic_acid_udca_ba;x3a_hydroxy_7_12_diketo_cholanic_acid_ba;x3a_hydroxy_12_ketolithocholic_acid_ba;x3_dehydrocholic_acid_ba;chenodeoxycholic_aci…	1.7900032543419126e-05
4	halodesulfurarchaeum;rubinisphaera	x5b_cholanic_acid_3b_12a_diol_ba;trimethylamine_s;glycoursodeoxycholic_acid_gudca_ba;glycochenodeoxycholic_acid_gcdca_ba;glycocholic_acid_gca_ba;tauro_w_muricholic_acid_tw_mca_ba;taurochenodeoxycholic_acid_tcdca_ba;taurocholic_acid_tca_ba;succinate_s;murocholic_acid_muro_ca_ba;ursodeoxycholic_acid_udca_ba;x3a_hydroxy_7_12_diketo_cholanic_acid_ba;x3a_hydroxy_12_ketolithocholic_acid_ba;x3_dehydroch…	1.7900032543419126e-05
5	granulicella;hydrogenophaga;leifsonia;nitrospira;brucella;roseovarius;granulibacter;ruminococcus;pseudogulbenkiania;methylomicrobium;acidithiobacillus;methylocella;tumebacillus;xanthobacter;pseudorhodoplanes;candidatus_solibacter;martelella;planctomyces;thiocystis;luteibacter;clavibacter;dietzia;micropruina;curtobacterium;microlunatus;niveispirillum;devosia;acidipropionibacterium;roseiflexus;cell…	allolithocholic_acid_ba;x3_6_diketocholanic_acid_ba;lithocholenic_acid_ba;x8_14_5b_cholenic_acid_3a_12a_diol_ba	2.0045453080669346e-05
6	brucella;roseovarius;granulibacter;ruminococcus;pseudogulbenkiania;methylomicrobium;acidithiobacillus;methylocella;tumebacillus;xanthobacter;pseudorhodoplanes;candidatus_solibacter;martelella;planctomyces;thiocystis;luteibacter;clavibacter;dietzia;micropruina;curtobacterium;microlunatus;niveispirillum;devosia;acidipropionibacterium;roseiflexus;cellulosimicrobium;methylorubrum;mycolicibacterium;pa…	succinate_s;murocholic_acid_muro_ca_ba;ursodeoxycholic_acid_udca_ba;x3a_hydroxy_7_12_diketo_cholanic_acid_ba;x3a_hydroxy_12_ketolithocholic_acid_ba;x3_dehydrocholic_acid_ba;chenodeoxycholic_acid_cdca_ba;cholic_acid_ca_ba	2.0045453080669346e-05
7	blastococcus;kitasatospora;kutzneria;simplicispira	succinate_s;murocholic_acid_muro_ca_ba;ursodeoxycholic_acid_udca_ba;x3a_hydroxy_7_12_diketo_cholanic_acid_ba;x3a_hydroxy_12_ketolithocholic_acid_ba;x3_dehydrocholic_acid_ba;chenodeoxycholic_acid_cdca_ba;cholic_acid_ca_ba	2.0045453080669346e-05
8	trueperella;thermosynechococcus;tistrella	succinate_s;murocholic_acid_muro_ca_ba;ursodeoxycholic_acid_udca_ba;x3a_hydroxy_7_12_diketo_cholanic_acid_ba;x3a_hydroxy_12_ketolithocholic_acid_ba;x3_dehydrocholic_acid_ba;chenodeoxycholic_acid_cdca_ba;cholic_acid_ca_ba	2.0045453080669346e-05
9	verrucomicrobium;halobacterium;neomicrococcus;acidobacterium;conexibacter;sphaerochaeta;ammonifex;blastomonas;thermosediminibacter;fimbriimonas;pelobacter;desulfuromonas;paracoccus	succinate_s;murocholic_acid_muro_ca_ba;ursodeoxycholic_acid_udca_ba;x3a_hydroxy_7_12_diketo_cholanic_acid_ba;x3a_hydroxy_12_ketolithocholic_acid_ba;x3_dehydrocholic_acid_ba;chenodeoxycholic_acid_cdca_ba;cholic_acid_ca_ba	2.0045453080669346e-05
10	alkalilimnicola;desulfurivibrio;yangia;salipiger;euzebya;pseudoxanthomonas	succinate_s;murocholic_acid_muro_ca_ba;ursodeoxycholic_acid_udca_ba;x3a_hydroxy_7_12_diketo_cholanic_acid_ba;x3a_hydroxy_12_ketolithocholic_acid_ba;x3_dehydrocholic_acid_ba;chenodeoxycholic_acid_cdca_ba;cholic_acid_ca_ba	2.0045453080669346e-05
11	cryobacterium;nakamurella;stigmatella	trimethylamine_s;glycoursodeoxycholic_acid_gudca_ba;glycochenodeoxycholic_acid_gcdca_ba;glycocholic_acid_gca_ba;tauro_w_muricholic_acid_tw_mca_ba;taurochenodeoxycholic_acid_tcdca_ba;taurocholic_acid_tca_ba;succinate_s;murocholic_acid_muro_ca_ba;ursodeoxycholic_acid_udca_ba;x3a_hydroxy_7_12_diketo_cholanic_acid_ba;x3a_hydroxy_12_ketolithocholic_acid_ba;x3_dehydrocholic_acid_ba;chenodeoxycholic_aci…	2.0045453080669346e-05
12	plantactinospora;gemmata;vulgatibacter;jatrophihabitans;kytococcus	succinate_s;murocholic_acid_muro_ca_ba;ursodeoxycholic_acid_udca_ba;x3a_hydroxy_7_12_diketo_cholanic_acid_ba;x3a_hydroxy_12_ketolithocholic_acid_ba;x3_dehydrocholic_acid_ba;chenodeoxycholic_acid_cdca_ba;cholic_acid_ca_ba	2.0045453080669346e-05
13	sinorhizobium;cloacibacillus;opitutus	tauro_w_muricholic_acid_tw_mca_ba;taurochenodeoxycholic_acid_tcdca_ba;taurocholic_acid_tca_ba;succinate_s;murocholic_acid_muro_ca_ba;ursodeoxycholic_acid_udca_ba;x3a_hydroxy_7_12_diketo_cholanic_acid_ba;x3a_hydroxy_12_ketolithocholic_acid_ba;x3_dehydrocholic_acid_ba;chenodeoxycholic_acid_cdca_ba;cholic_acid_ca_ba	2.0045453080669346e-05
14	amycolatopsis;deinococcus;gemmatirosa;altererythrobacter;magnetospirillum;rhodococcus;anaeromyxobacter;caulobacter;frankia;bradyrhizobium;micromonospora;brachybacterium;ethanoligenens;actinoplanes;nocardiopsis	tauro_w_muricholic_acid_tw_mca_ba;taurochenodeoxycholic_acid_tcdca_ba;taurocholic_acid_tca_ba;succinate_s;murocholic_acid_muro_ca_ba;ursodeoxycholic_acid_udca_ba;x3a_hydroxy_7_12_diketo_cholanic_acid_ba;x3a_hydroxy_12_ketolithocholic_acid_ba;x3_dehydrocholic_acid_ba;chenodeoxycholic_acid_cdca_ba;cholic_acid_ca_ba	2.0045453080669346e-05
15	aminobacter;desulfatibacillum;syntrophomonas;thiolapillus;thermomonospora;aminomonas;moorella	x3a_hydroxy_12_ketolithocholic_acid_ba;x3_dehydrocholic_acid_ba;chenodeoxycholic_acid_cdca_ba;cholic_acid_ca_ba	2.076228568068709e-05
16	aminobacter;desulfatibacillum;syntrophomonas;thiolapillus;thermomonospora;aminomonas;moorella	allolithocholic_acid_ba	2.187200769368441e-05
17	oceanithermus;rhodobacter;chelativorans;polymorphum;sphingomonas	tauro_w_muricholic_acid_tw_mca_ba;taurochenodeoxycholic_acid_tcdca_ba;taurocholic_acid_tca_ba;succinate_s;murocholic_acid_muro_ca_ba;ursodeoxycholic_acid_udca_ba;x3a_hydroxy_7_12_diketo_cholanic_acid_ba;x3a_hydroxy_12_ketolithocholic_acid_ba;x3_dehydrocholic_acid_ba;chenodeoxycholic_acid_cdca_ba;cholic_acid_ca_ba	2.775567015291972e-05
18	sanguibacter;segniliparus;frondihabitans;sideroxydans;cellulomonas;miniimonas	succinate_s;murocholic_acid_muro_ca_ba;ursodeoxycholic_acid_udca_ba;x3a_hydroxy_7_12_diketo_cholanic_acid_ba;x3a_hydroxy_12_ketolithocholic_acid_ba;x3_dehydrocholic_acid_ba;chenodeoxycholic_acid_cdca_ba;cholic_acid_ca_ba	3.211251955966522e-05
19	marmoricola;modestobacter;thalassococcus;variibacter;rhizorhabdus;brevirhabdus;methylosinus	x3a_hydroxy_7_12_diketo_cholanic_acid_ba;x3a_hydroxy_12_ketolithocholic_acid_ba;x3_dehydrocholic_acid_ba;chenodeoxycholic_acid_cdca_ba;cholic_acid_ca_ba	3.581132066103791e-05
20	friedmanniella;sorangium;microbacterium;saccharomonospora;cystobacter;corallococcus;nocardioides	succinate_s;murocholic_acid_muro_ca_ba;ursodeoxycholic_acid_udca_ba;x3a_hydroxy_7_12_diketo_cholanic_acid_ba;x3a_hydroxy_12_ketolithocholic_acid_ba;x3_dehydrocholic_acid_ba;chenodeoxycholic_acid_cdca_ba;cholic_acid_ca_ba	4.075603062754138e-05
21	luteimonas;methylocystis;polaromonas;ralstonia;variovorax;paraburkholderia;burkholderia;massilia;pandoraea;azospira;thauera;desulfococcus;azotobacter;rhodopseudomonas	succinate_s	5.1154823916115616e-05
22	rhodobaca;acidiphilium;gluconacetobacter	succinate_s;murocholic_acid_muro_ca_ba;ursodeoxycholic_acid_udca_ba;x3a_hydroxy_7_12_diketo_cholanic_acid_ba;x3a_hydroxy_12_ketolithocholic_acid_ba;x3_dehydrocholic_acid_ba;chenodeoxycholic_acid_cdca_ba;cholic_acid_ca_ba	5.170133614106736e-05
23	halopiger;defluviimonas;leptothrix;thermosulfidibacter;melaminivora;cohaesibacter;pyrococcus	succinate_s;murocholic_acid_muro_ca_ba;ursodeoxycholic_acid_udca_ba;x3a_hydroxy_7_12_diketo_cholanic_acid_ba;x3a_hydroxy_12_ketolithocholic_acid_ba;x3_dehydrocholic_acid_ba;chenodeoxycholic_acid_cdca_ba;cholic_acid_ca_ba	5.27761489371353e-05
24	nitrobacter;rhodospirillum;ramlibacter;thioalkalivibrio	succinate_s;murocholic_acid_muro_ca_ba;ursodeoxycholic_acid_udca_ba;x3a_hydroxy_7_12_diketo_cholanic_acid_ba;x3a_hydroxy_12_ketolithocholic_acid_ba;x3_dehydrocholic_acid_ba;chenodeoxycholic_acid_cdca_ba;cholic_acid_ca_ba	5.9758522168537805e-05
25	plantactinospora;gemmata;vulgatibacter;jatrophihabitans;kytococcus;actinoalloteichus;terriglobus;archangium;caldilinea;sinorhizobium;cloacibacillus;opitutus;dokdonella;friedmanniella;sorangium;microbacterium;saccharomonospora;cystobacter;corallococcus;nocardioides;aeromicrobium;novosphingobium;brevundimonas;intestinimonas;zobellella;thermus;limnochorda;meiothermus;kocuria;pseudonocardia;rubrobact…	allolithocholic_acid_ba	8.88961792561427e-05
26	marmoricola;modestobacter;thalassococcus;variibacter;rhizorhabdus;brevirhabdus;methylosinus	allolithocholic_acid_ba;x3_6_diketocholanic_acid_ba;lithocholenic_acid_ba;x8_14_5b_cholenic_acid_3a_12a_diol_ba	8.973896698717668e-05
27	micavibrio	x3a_hydroxy_7_12_diketo_cholanic_acid_ba;x3a_hydroxy_12_ketolithocholic_acid_ba;x3_dehydrocholic_acid_ba;chenodeoxycholic_acid_cdca_ba;cholic_acid_ca_ba	9.084062075992142e-05
28	halorubrum;agrococcus;verrucosispora	glycoursodeoxycholic_acid_gudca_ba;glycochenodeoxycholic_acid_gcdca_ba;glycocholic_acid_gca_ba;tauro_w_muricholic_acid_tw_mca_ba;taurochenodeoxycholic_acid_tcdca_ba;taurocholic_acid_tca_ba;succinate_s;murocholic_acid_muro_ca_ba;ursodeoxycholic_acid_udca_ba;x3a_hydroxy_7_12_diketo_cholanic_acid_ba;x3a_hydroxy_12_ketolithocholic_acid_ba;x3_dehydrocholic_acid_ba;chenodeoxycholic_acid_cdca_ba;cholic_…	9.248135192689961e-05
29	asticcacaulis	murocholic_acid_muro_ca_ba;ursodeoxycholic_acid_udca_ba;x3a_hydroxy_7_12_diketo_cholanic_acid_ba;x3a_hydroxy_12_ketolithocholic_acid_ba;x3_dehydrocholic_acid_ba;chenodeoxycholic_acid_cdca_ba;cholic_acid_ca_ba	9.508475342790942e-05
30	halanaeroarchaeum;haloplanus;halodesulfurarchaeum;rubinisphaera	allolithocholic_acid_ba;x3_6_diketocholanic_acid_ba;lithocholenic_acid_ba;x8_14_5b_cholenic_acid_3a_12a_diol_ba	9.508475342790942e-05
31	tsukamurella	succinate_s;murocholic_acid_muro_ca_ba;ursodeoxycholic_acid_udca_ba;x3a_hydroxy_7_12_diketo_cholanic_acid_ba;x3a_hydroxy_12_ketolithocholic_acid_ba;x3_dehydrocholic_acid_ba;chenodeoxycholic_acid_cdca_ba;cholic_acid_ca_ba	0.00013088
32	mobiluncus;propionimicrobium;pelagibaca;coraliomargarita;lacunisphaera;arsenicicoccus;chloracidobacterium;spiribacter;adlercreutzia;methanothrix;desulfallas;stackebrandtia;geitlerinema;geodermatophilus;actinopolymorpha;ketogulonicigenium	succinate_s;murocholic_acid_muro_ca_ba;ursodeoxycholic_acid_udca_ba;x3a_hydroxy_7_12_diketo_cholanic_acid_ba;x3a_hydroxy_12_ketolithocholic_acid_ba;x3_dehydrocholic_acid_ba;chenodeoxycholic_acid_cdca_ba;cholic_acid_ca_ba	0.000133481
33	archangium;caldilinea	glycoursodeoxycholic_acid_gudca_ba;glycochenodeoxycholic_acid_gcdca_ba;glycocholic_acid_gca_ba;tauro_w_muricholic_acid_tw_mca_ba;taurochenodeoxycholic_acid_tcdca_ba;taurocholic_acid_tca_ba;succinate_s;murocholic_acid_muro_ca_ba;ursodeoxycholic_acid_udca_ba;x3a_hydroxy_7_12_diketo_cholanic_acid_ba;x3a_hydroxy_12_ketolithocholic_acid_ba;x3_dehydrocholic_acid_ba;chenodeoxycholic_acid_cdca_ba;cholic_…	0.000137099
34	citromicrobium;waddlia;alistipes;mucinivorans	x3a_hydroxy_12_ketolithocholic_acid_ba;x3_dehydrocholic_acid_ba;chenodeoxycholic_acid_cdca_ba;cholic_acid_ca_ba	0.000138339
35	thermobaculum;aurantimicrobium;pirellula;parascardovia;phycisphaera	murocholic_acid_muro_ca_ba;ursodeoxycholic_acid_udca_ba	0.000143332
36	plantactinospora;gemmata;vulgatibacter;jatrophihabitans;kytococcus;actinoalloteichus;terriglobus;archangium;caldilinea;sinorhizobium;cloacibacillus;opitutus;dokdonella;friedmanniella;sorangium;microbacterium;saccharomonospora;cystobacter;corallococcus;nocardioides;aeromicrobium;novosphingobium;brevundimonas;intestinimonas;zobellella;thermus;limnochorda;meiothermus;kocuria;pseudonocardia;rubrobact…	lithocholenic_acid_ba;x8_14_5b_cholenic_acid_3a_12a_diol_ba	0.000151426
37	luteimonas;methylocystis;polaromonas;ralstonia;variovorax;paraburkholderia;burkholderia;massilia;pandoraea;azospira;thauera;desulfococcus;azotobacter;rhodopseudomonas	x3a_hydroxy_12_ketolithocholic_acid_ba;x3_dehydrocholic_acid_ba;chenodeoxycholic_acid_cdca_ba;cholic_acid_ca_ba	0.000156047
38	thiodictyon;sphingobium;nocardia;arthrobacter;mesorhizobium;streptomyces;chromobacterium;tessaracoccus;acidovorax;achromobacter;cupriavidus	x3a_hydroxy_12_ketolithocholic_acid_ba;x3_dehydrocholic_acid_ba;chenodeoxycholic_acid_cdca_ba;cholic_acid_ca_ba	0.000165591
39	methanofollis;niabella	succinate_s	0.000168613
40	ensifer;lysobacter;salinicola	tauro_w_muricholic_acid_tw_mca_ba;taurochenodeoxycholic_acid_tcdca_ba;taurocholic_acid_tca_ba;succinate_s;murocholic_acid_muro_ca_ba;ursodeoxycholic_acid_udca_ba;x3a_hydroxy_7_12_diketo_cholanic_acid_ba;x3a_hydroxy_12_ketolithocholic_acid_ba;x3_dehydrocholic_acid_ba;chenodeoxycholic_acid_cdca_ba;cholic_acid_ca_ba	0.000171473
41	aquaspirillum;delftia	succinate_s	0.000191006
42	mitsuaria;dechloromonas;castellaniella;sulfurifustis	succinate_s	0.000221472
43	brevefilum;leptolyngbya;pelagibacterium;wenzhouxiangella;fibrobacter;kyrpidia	x3a_hydroxy_12_ketolithocholic_acid_ba;x3_dehydrocholic_acid_ba;chenodeoxycholic_acid_cdca_ba;cholic_acid_ca_ba	0.000229615
44	dokdonella	tauro_w_muricholic_acid_tw_mca_ba;taurochenodeoxycholic_acid_tcdca_ba;taurocholic_acid_tca_ba;succinate_s;murocholic_acid_muro_ca_ba;ursodeoxycholic_acid_udca_ba;x3a_hydroxy_7_12_diketo_cholanic_acid_ba;x3a_hydroxy_12_ketolithocholic_acid_ba;x3_dehydrocholic_acid_ba;chenodeoxycholic_acid_cdca_ba;cholic_acid_ca_ba	0.000230403
45	thermosynechococcus;tistrella	allolithocholic_acid_ba;x3_6_diketocholanic_acid_ba;lithocholenic_acid_ba;x8_14_5b_cholenic_acid_3a_12a_diol_ba	0.000230797
46	blastococcus;kitasatospora;kutzneria;simplicispira	allolithocholic_acid_ba	0.000254586
47	rhizobacter;rubrivivax;methylibium;thiobacillus	succinate_s	0.00026018
48	thermobifida;nonomuraea;entomoplasma;actinotignum;monoglobus	succinate_s;murocholic_acid_muro_ca_ba;ursodeoxycholic_acid_udca_ba;x3a_hydroxy_7_12_diketo_cholanic_acid_ba;x3a_hydroxy_12_ketolithocholic_acid_ba;x3_dehydrocholic_acid_ba;chenodeoxycholic_acid_cdca_ba;cholic_acid_ca_ba	0.000264933
49	brucella;roseovarius;granulibacter;ruminococcus;pseudogulbenkiania;methylomicrobium;acidithiobacillus;methylocella;tumebacillus;xanthobacter;pseudorhodoplanes;candidatus_solibacter;martelella;planctomyces;thiocystis;luteibacter;clavibacter;dietzia;micropruina;curtobacterium;microlunatus;niveispirillum;devosia;acidipropionibacterium;roseiflexus;cellulosimicrobium;methylorubrum;mycolicibacterium;pa…	tauro_w_muricholic_acid_tw_mca_ba	0.000268096
50	alkalitalea;citromicrobium;waddlia;alistipes;mucinivorans	allolithocholic_acid_ba	0.00027764
51	rhodobaca;acidiphilium;gluconacetobacter	allolithocholic_acid_ba	0.000278144
52	thiodictyon;sphingobium;nocardia;arthrobacter;mesorhizobium;streptomyces;chromobacterium;tessaracoccus;acidovorax;achromobacter;cupriavidus	succinate_s	0.000280584
53	rhizobium;stenotrophomonas;xanthomonas;mycobacterium;pseudomonas;geobacter;azospirillum;halomonas;comamonas;bordetella;orrella	succinate_s	0.000284908
54	carboxydocella;candidatus_desulforudis;treponema	succinate_s	0.000284908
55	zobellella;thermus;limnochorda;meiothermus	succinate_s;murocholic_acid_muro_ca_ba;ursodeoxycholic_acid_udca_ba;x3a_hydroxy_7_12_diketo_cholanic_acid_ba;x3a_hydroxy_12_ketolithocholic_acid_ba;x3_dehydrocholic_acid_ba;chenodeoxycholic_acid_cdca_ba;cholic_acid_ca_ba	0.000292668
56	ereboglobus;sagittula	succinate_s;murocholic_acid_muro_ca_ba;ursodeoxycholic_acid_udca_ba;x3a_hydroxy_7_12_diketo_cholanic_acid_ba;x3a_hydroxy_12_ketolithocholic_acid_ba;x3_dehydrocholic_acid_ba;chenodeoxycholic_acid_cdca_ba;cholic_acid_ca_ba	0.00029486
57	jannaschia	succinate_s	0.000309417
58	oceanithermus;rhodobacter;chelativorans;polymorphum;sphingomonas	allolithocholic_acid_ba;x3_6_diketocholanic_acid_ba;lithocholenic_acid_ba;x8_14_5b_cholenic_acid_3a_12a_diol_ba	0.000309417
59	roseomonas	succinate_s;murocholic_acid_muro_ca_ba;ursodeoxycholic_acid_udca_ba;x3a_hydroxy_7_12_diketo_cholanic_acid_ba;x3a_hydroxy_12_ketolithocholic_acid_ba;x3_dehydrocholic_acid_ba;chenodeoxycholic_acid_cdca_ba;cholic_acid_ca_ba	0.000309652
60	actinoalloteichus;terriglobus	succinate_s;murocholic_acid_muro_ca_ba;ursodeoxycholic_acid_udca_ba;x3a_hydroxy_7_12_diketo_cholanic_acid_ba;x3a_hydroxy_12_ketolithocholic_acid_ba;x3_dehydrocholic_acid_ba;chenodeoxycholic_acid_cdca_ba;cholic_acid_ca_ba	0.000312383
61	aeromicrobium;novosphingobium	succinate_s;murocholic_acid_muro_ca_ba;ursodeoxycholic_acid_udca_ba;x3a_hydroxy_7_12_diketo_cholanic_acid_ba;x3a_hydroxy_12_ketolithocholic_acid_ba;x3_dehydrocholic_acid_ba;chenodeoxycholic_acid_cdca_ba;cholic_acid_ca_ba	0.000320552
62	kribbella;melittangium;jiangella;marichromatium;alicycliphilus;paraoerskovia	x3a_hydroxy_12_ketolithocholic_acid_ba;x3_dehydrocholic_acid_ba;chenodeoxycholic_acid_cdca_ba;cholic_acid_ca_ba	0.000332006
63	maricaulis;alloactinosynnema;glutamicibacter	succinate_s;murocholic_acid_muro_ca_ba;ursodeoxycholic_acid_udca_ba;x3a_hydroxy_7_12_diketo_cholanic_acid_ba;x3a_hydroxy_12_ketolithocholic_acid_ba;x3_dehydrocholic_acid_ba;chenodeoxycholic_acid_cdca_ba;cholic_acid_ca_ba	0.000351432
64	azoarcus	succinate_s;murocholic_acid_muro_ca_ba;ursodeoxycholic_acid_udca_ba;x3a_hydroxy_7_12_diketo_cholanic_acid_ba;x3a_hydroxy_12_ketolithocholic_acid_ba;x3_dehydrocholic_acid_ba;chenodeoxycholic_acid_cdca_ba;cholic_acid_ca_ba	0.00036108
65	kribbella;melittangium;jiangella;marichromatium;alicycliphilus;paraoerskovia	succinate_s	0.000363952
66	agromyces;brevibacterium	murocholic_acid_muro_ca_ba;ursodeoxycholic_acid_udca_ba;x3a_hydroxy_7_12_diketo_cholanic_acid_ba;x3a_hydroxy_12_ketolithocholic_acid_ba;x3_dehydrocholic_acid_ba;chenodeoxycholic_acid_cdca_ba;cholic_acid_ca_ba	0.000367912
67	isosphaera;pseudohongiella	murocholic_acid_muro_ca_ba;ursodeoxycholic_acid_udca_ba;x3a_hydroxy_7_12_diketo_cholanic_acid_ba;x3a_hydroxy_12_ketolithocholic_acid_ba;x3_dehydrocholic_acid_ba;chenodeoxycholic_acid_cdca_ba;cholic_acid_ca_ba	0.00036931
68	eikenella	succinate_s;murocholic_acid_muro_ca_ba;ursodeoxycholic_acid_udca_ba;x3a_hydroxy_7_12_diketo_cholanic_acid_ba;x3a_hydroxy_12_ketolithocholic_acid_ba;x3_dehydrocholic_acid_ba;chenodeoxycholic_acid_cdca_ba;cholic_acid_ca_ba	0.000371229
69	citromicrobium;waddlia	x3_6_diketocholanic_acid_ba;lithocholenic_acid_ba;x8_14_5b_cholenic_acid_3a_12a_diol_ba	0.000384103
70	rhodoferax;candidatus_promineofilum;desulfarculus	x3a_hydroxy_7_12_diketo_cholanic_acid_ba;x3a_hydroxy_12_ketolithocholic_acid_ba;x3_dehydrocholic_acid_ba;chenodeoxycholic_acid_cdca_ba;cholic_acid_ca_ba	0.000388416
71	bosea;ottowia	succinate_s	0.000393706
72	agarilytica;coprothermobacter;aequorivita;trichormus	succinate_s	0.000397605
73	leifsonia;nitrospira	succinate_s;murocholic_acid_muro_ca_ba;ursodeoxycholic_acid_udca_ba;x3a_hydroxy_7_12_diketo_cholanic_acid_ba;x3a_hydroxy_12_ketolithocholic_acid_ba;x3_dehydrocholic_acid_ba;chenodeoxycholic_acid_cdca_ba;cholic_acid_ca_ba	0.000401741
74	methylomonas;bdellovibrio;labrenzia;neisseria;magnetococcus;phaeobacter;nitrospirillum;salinibacter;microvirga;pseudarthrobacter	succinate_s	0.000402326
75	micavibrio	succinate_s	0.000404873
76	alistipes	lithocholenic_acid_ba	0.000415387
77	sandaracinus;erythrobacter;luteitalea;myxococcus;sphingopyxis	x3a_hydroxy_7_12_diketo_cholanic_acid_ba;x3a_hydroxy_12_ketolithocholic_acid_ba;x3_dehydrocholic_acid_ba;chenodeoxycholic_acid_cdca_ba;cholic_acid_ca_ba	0.000431659
78	methanofollis;niabella	glycoursodeoxycholic_acid_gudca_ba;glycochenodeoxycholic_acid_gcdca_ba;glycocholic_acid_gca_ba	0.000434245
79	rhodoferax;candidatus_promineofilum;desulfarculus	allolithocholic_acid_ba;x3_6_diketocholanic_acid_ba;lithocholenic_acid_ba;x8_14_5b_cholenic_acid_3a_12a_diol_ba	0.000440436
80	ensifer;lysobacter;salinicola;luteimonas;methylocystis;polaromonas;ralstonia;variovorax;paraburkholderia;burkholderia;massilia;pandoraea;azospira;thauera;desulfococcus;azotobacter;rhodopseudomonas	allolithocholic_acid_ba	0.000453734
81	candidatus_endolissoclinum;hirschia	x3a_hydroxy_7_12_diketo_cholanic_acid_ba;x3a_hydroxy_12_ketolithocholic_acid_ba;x3_dehydrocholic_acid_ba;chenodeoxycholic_acid_cdca_ba;cholic_acid_ca_ba	0.000455169
82	rhizobium;stenotrophomonas;xanthomonas;mycobacterium;pseudomonas;geobacter;azospirillum;halomonas;comamonas;bordetella;orrella	x3a_hydroxy_12_ketolithocholic_acid_ba;x3_dehydrocholic_acid_ba;chenodeoxycholic_acid_cdca_ba;cholic_acid_ca_ba	0.000455572
83	azorhizobium;celeribacter	succinate_s;murocholic_acid_muro_ca_ba;ursodeoxycholic_acid_udca_ba;x3a_hydroxy_7_12_diketo_cholanic_acid_ba;x3a_hydroxy_12_ketolithocholic_acid_ba;x3_dehydrocholic_acid_ba;chenodeoxycholic_acid_cdca_ba;cholic_acid_ca_ba	0.000473637
84	singulisphaera;libanicoccus;denitrobacterium;corynebacterium;olsenella	murocholic_acid_muro_ca_ba;ursodeoxycholic_acid_udca_ba;x3a_hydroxy_7_12_diketo_cholanic_acid_ba;x3a_hydroxy_12_ketolithocholic_acid_ba;x3_dehydrocholic_acid_ba;chenodeoxycholic_acid_cdca_ba;cholic_acid_ca_ba	0.000481648
85	methylovulum;micavibrio	hyodeoxycholic_acid_ba;glycodeoxycholic_acid_gdca_ba;deoxycholic_acid_dca_ba;isolithocholic_acid_ba;lithocholic_acid_ba	0.000483917
86	candidatus_symbiobacter	succinate_s	0.000484388
87	sulfuricaulis	murocholic_acid_muro_ca_ba;ursodeoxycholic_acid_udca_ba;x3a_hydroxy_7_12_diketo_cholanic_acid_ba;x3a_hydroxy_12_ketolithocholic_acid_ba;x3_dehydrocholic_acid_ba;chenodeoxycholic_acid_cdca_ba;cholic_acid_ca_ba	0.000495704
88	natrinema;salinigranum;actinosynnema;auraticoccus	glycochenodeoxycholic_acid_gcdca_ba;glycocholic_acid_gca_ba	0.000517264
89	gordonibacter	tauro_w_muricholic_acid_tw_mca_ba;taurochenodeoxycholic_acid_tcdca_ba;taurocholic_acid_tca_ba;succinate_s;murocholic_acid_muro_ca_ba;ursodeoxycholic_acid_udca_ba;x3a_hydroxy_7_12_diketo_cholanic_acid_ba;x3a_hydroxy_12_ketolithocholic_acid_ba;x3_dehydrocholic_acid_ba;chenodeoxycholic_acid_cdca_ba;cholic_acid_ca_ba	0.000523328
90	citrobacter;methanococcoides	succinate_s;murocholic_acid_muro_ca_ba;ursodeoxycholic_acid_udca_ba;x3a_hydroxy_7_12_diketo_cholanic_acid_ba;x3a_hydroxy_12_ketolithocholic_acid_ba;x3_dehydrocholic_acid_ba;chenodeoxycholic_acid_cdca_ba;cholic_acid_ca_ba	0.000541033
91	dyadobacter	x3a_hydroxy_7_12_diketo_cholanic_acid_ba;x3a_hydroxy_12_ketolithocholic_acid_ba;x3_dehydrocholic_acid_ba;chenodeoxycholic_acid_cdca_ba;cholic_acid_ca_ba	0.000616963
92	methylophilus;kibdelosporangium;prauserella;thermovirga	x3a_hydroxy_12_ketolithocholic_acid_ba;x3_dehydrocholic_acid_ba;chenodeoxycholic_acid_cdca_ba;cholic_acid_ca_ba	0.00062001
93	anabaena;haematospirillum;planktomarina;woeseia;afipia;candidatus_accumulibacter;paucibacter	succinate_s	0.000620598
94	blastochloris;ectothiorhodospira;verminephrobacter;lentzea;thermobispora	allolithocholic_acid_ba	0.000643854
95	alkalilimnicola;desulfurivibrio;yangia;salipiger;euzebya;pseudoxanthomonas	allolithocholic_acid_ba	0.000643854
96	siansivirga;sulfuricurvum	x3a_hydroxy_7_12_diketo_cholanic_acid_ba;x3a_hydroxy_12_ketolithocholic_acid_ba;x3_dehydrocholic_acid_ba;chenodeoxycholic_acid_cdca_ba;cholic_acid_ca_ba	0.00066071
97	rubinisphaera	deoxycholic_acid_dca_ba;isolithocholic_acid_ba;lithocholic_acid_ba	0.00066071
98	acetobacter;ruegeria;synechococcus;dehalogenimonas;selenomonas;desulfitobacterium;desulfotomaculum	succinate_s	0.000663705
99	kineococcus;salinibacterium;pimelobacter;sinomonas;bradymonas;salinispora	x3a_hydroxy_7_12_diketo_cholanic_acid_ba;x3a_hydroxy_12_ketolithocholic_acid_ba;x3_dehydrocholic_acid_ba;chenodeoxycholic_acid_cdca_ba;cholic_acid_ca_ba	0.000697698
100	blastochloris;ectothiorhodospira;verminephrobacter;lentzea;thermobispora	murocholic_acid_muro_ca_ba;ursodeoxycholic_acid_udca_ba;x3a_hydroxy_7_12_diketo_cholanic_acid_ba;x3a_hydroxy_12_ketolithocholic_acid_ba;x3_dehydrocholic_acid_ba;chenodeoxycholic_acid_cdca_ba;cholic_acid_ca_ba	0.000721818
101	siansivirga;sulfuricurvum	succinate_s	0.00073944
102	marinobacterium;pseudodesulfovibrio;lawsonia;desulfomicrobium;desulfovibrio;acidimicrobium;halomicrobium	tauro_w_muricholic_acid_tw_mca_ba	0.00073944
103	leclercia	glutamate_s	0.000742148
104	candidatus_midichloria;halothermothrix;oscillatoria;sulfurovum;candidatus_paracaedibacter;scytonema;anaplasma;nitrosococcus	succinate_s	0.00074957
105	kineococcus;salinibacterium;pimelobacter;sinomonas;bradymonas;salinispora	succinate_s	0.000767428
106	candidatus_methanomethylophilus;thermacetogenium;saccharothrix;jannaschia;microterricola	allolithocholic_acid_ba	0.000776539
107	renibacterium	glycochenodeoxycholic_acid_gcdca_ba;glycocholic_acid_gca_ba	0.000782865
108	aquaspirillum;delftia	x3a_hydroxy_7_12_diketo_cholanic_acid_ba;x3a_hydroxy_12_ketolithocholic_acid_ba;x3_dehydrocholic_acid_ba;chenodeoxycholic_acid_cdca_ba;cholic_acid_ca_ba	0.000791355
109	citrobacter;methanococcoides	lithocholenic_acid_ba	0.000812776
110	thermococcus;aeromonas;serinicoccus	succinate_s	0.000815774
111	anabaena;haematospirillum;planktomarina;woeseia;afipia;candidatus_accumulibacter;paucibacter	x3a_hydroxy_7_12_diketo_cholanic_acid_ba;x3a_hydroxy_12_ketolithocholic_acid_ba;x3_dehydrocholic_acid_ba;chenodeoxycholic_acid_cdca_ba;cholic_acid_ca_ba	0.000815965
112	granulicella;hydrogenophaga	succinate_s	0.000815965
113	roseibacterium	x3a_hydroxy_7_12_diketo_cholanic_acid_ba;x3a_hydroxy_12_ketolithocholic_acid_ba;x3_dehydrocholic_acid_ba;chenodeoxycholic_acid_cdca_ba;cholic_acid_ca_ba	0.000821769
114	kribbella;melittangium;jiangella;marichromatium	x8_14_5b_cholenic_acid_3a_12a_diol_ba	0.000825999
115	mobiluncus;propionimicrobium	x5b_cholanic_acid_3b_12a_diol_ba	0.000827441
116	cryobacterium;nakamurella;stigmatella	allolithocholic_acid_ba	0.000851584
117	ruminiclostridium	x3a_hydroxy_7_12_diketo_cholanic_acid_ba;x3a_hydroxy_12_ketolithocholic_acid_ba;x3_dehydrocholic_acid_ba;chenodeoxycholic_acid_cdca_ba;cholic_acid_ca_ba	0.00085935
118	citromicrobium;waddlia	tauro_w_muricholic_acid_tw_mca_ba	0.000864541
119	rathayibacter;vogesella	succinate_s	0.00086777
120	cnuibacter;geobacillus;gloeobacter	ursodeoxycholic_acid_udca_ba	0.000971298
121	afipia	x8_14_5b_cholenic_acid_3a_12a_diol_ba	0.000980862
122	aminobacterium	x3a_hydroxy_7_12_diketo_cholanic_acid_ba;x3a_hydroxy_12_ketolithocholic_acid_ba;x3_dehydrocholic_acid_ba;chenodeoxycholic_acid_cdca_ba;cholic_acid_ca_ba	0.00100733
123	herbaspirillum;laribacter;roseateles	succinate_s	0.00103713
124	serinicoccus	murocholic_acid_muro_ca_ba;ursodeoxycholic_acid_udca_ba	0.00104365
125	agrobacterium;neorhizobium	x3a_hydroxy_7_12_diketo_cholanic_acid_ba;x3a_hydroxy_12_ketolithocholic_acid_ba;x3_dehydrocholic_acid_ba;chenodeoxycholic_acid_cdca_ba;cholic_acid_ca_ba	0.00105185
126	rhodospirillum;ramlibacter;thioalkalivibrio	allolithocholic_acid_ba	0.00107885
127	agromyces;brevibacterium	succinate_s	0.00109388
128	dechloromonas;castellaniella;sulfurifustis	lithocholenic_acid_ba;x8_14_5b_cholenic_acid_3a_12a_diol_ba	0.00110362
129	brevefilum;leptolyngbya;pelagibacterium;wenzhouxiangella;fibrobacter;kyrpidia	ursodeoxycholic_acid_udca_ba	0.0011067
130	desulfatibacillum;syntrophomonas	tauro_w_muricholic_acid_tw_mca_ba	0.00111064
131	marivirga;salinivirga	tauro_w_muricholic_acid_tw_mca_ba;taurochenodeoxycholic_acid_tcdca_ba;taurocholic_acid_tca_ba;succinate_s;murocholic_acid_muro_ca_ba;ursodeoxycholic_acid_udca_ba;x3a_hydroxy_7_12_diketo_cholanic_acid_ba;x3a_hydroxy_12_ketolithocholic_acid_ba;x3_dehydrocholic_acid_ba;chenodeoxycholic_acid_cdca_ba;cholic_acid_ca_ba	0.00112726
132	desulfatibacillum;syntrophomonas	hyodeoxycholic_acid_ba;glycodeoxycholic_acid_gdca_ba;deoxycholic_acid_dca_ba;isolithocholic_acid_ba;lithocholic_acid_ba	0.00113672
133	kineococcus;salinibacterium;pimelobacter;sinomonas;bradymonas;salinispora	ursodeoxycholic_acid_udca_ba	0.00115205
134	desulfurispirillum;pararhodospirillum	tauro_w_muricholic_acid_tw_mca_ba	0.00116387
135	chondromyces	succinate_s;murocholic_acid_muro_ca_ba;ursodeoxycholic_acid_udca_ba;x3a_hydroxy_7_12_diketo_cholanic_acid_ba;x3a_hydroxy_12_ketolithocholic_acid_ba;x3_dehydrocholic_acid_ba;chenodeoxycholic_acid_cdca_ba;cholic_acid_ca_ba	0.00117931
136	chelatococcus;thiomonas;alcanivorax;phreatobacter	succinate_s	0.00119892
137	nitratifractor;halorubrum;agrococcus;verrucosispora	allolithocholic_acid_ba	0.00122383
138	halogeometricum;methanoculleus	lithocholenic_acid_ba;x8_14_5b_cholenic_acid_3a_12a_diol_ba	0.00129078
139	beijerinckia	x3a_hydroxy_7_12_diketo_cholanic_acid_ba;x3a_hydroxy_12_ketolithocholic_acid_ba;x3_dehydrocholic_acid_ba;chenodeoxycholic_acid_cdca_ba;cholic_acid_ca_ba	0.00130327
140	curvibacter;catenulispora;faecalibacterium;natrinema;salinigranum;actinosynnema;auraticoccus	murocholic_acid_muro_ca_ba;ursodeoxycholic_acid_udca_ba	0.00131672
141	zymomonas;croceicoccus;prosthecochloris	x3a_hydroxy_12_ketolithocholic_acid_ba;x3_dehydrocholic_acid_ba;chenodeoxycholic_acid_cdca_ba;cholic_acid_ca_ba	0.00135237
142	afipia	allolithocholic_acid_ba	0.00138044
143	caldisericum	x3a_hydroxy_12_ketolithocholic_acid_ba;x3_dehydrocholic_acid_ba;chenodeoxycholic_acid_cdca_ba;cholic_acid_ca_ba	0.00142514
144	rhodoferax;candidatus_promineofilum;desulfarculus	succinate_s	0.00143426
145	thermobifida;nonomuraea;entomoplasma;actinotignum;monoglobus	allolithocholic_acid_ba	0.00151404
146	kribbella;melittangium;jiangella;marichromatium	allolithocholic_acid_ba	0.00152249
147	marmoricola;modestobacter;thalassococcus;variibacter;rhizorhabdus;brevirhabdus;methylosinus	succinate_s	0.00159205
148	marinobacterium;pseudodesulfovibrio;lawsonia;desulfomicrobium;desulfovibrio;acidimicrobium;halomicrobium;desulfobulbus;desulfohalobium	allolithocholic_acid_ba	0.00162203
149	rhodobaca;acidiphilium;gluconacetobacter	lithocholenic_acid_ba;x8_14_5b_cholenic_acid_3a_12a_diol_ba	0.00164335
150	methanofollis;niabella	x3a_hydroxy_7_12_diketo_cholanic_acid_ba;x3a_hydroxy_12_ketolithocholic_acid_ba;x3_dehydrocholic_acid_ba;chenodeoxycholic_acid_cdca_ba;cholic_acid_ca_ba	0.00169607
151	candidatus_methanomethylophilus;thermacetogenium	succinate_s;murocholic_acid_muro_ca_ba;ursodeoxycholic_acid_udca_ba;x3a_hydroxy_7_12_diketo_cholanic_acid_ba;x3a_hydroxy_12_ketolithocholic_acid_ba;x3_dehydrocholic_acid_ba;chenodeoxycholic_acid_cdca_ba;cholic_acid_ca_ba	0.00169607
152	aminobacter	murocholic_acid_muro_ca_ba;ursodeoxycholic_acid_udca_ba	0.00169607
153	lawsonella	murocholic_acid_muro_ca_ba;ursodeoxycholic_acid_udca_ba;x3a_hydroxy_7_12_diketo_cholanic_acid_ba;x3a_hydroxy_12_ketolithocholic_acid_ba;x3_dehydrocholic_acid_ba;chenodeoxycholic_acid_cdca_ba;cholic_acid_ca_ba	0.00170795
154	christensenella;dehalobacterium	x3a_hydroxy_12_ketolithocholic_acid_ba;x3_dehydrocholic_acid_ba;chenodeoxycholic_acid_cdca_ba;cholic_acid_ca_ba	0.00170795
155	haloplanus	x3a_hydroxy_7_12_diketo_cholanic_acid_ba;x3a_hydroxy_12_ketolithocholic_acid_ba;x3_dehydrocholic_acid_ba;chenodeoxycholic_acid_cdca_ba;cholic_acid_ca_ba	0.00172579
156	parascardovia;phycisphaera	x3a_hydroxy_12_ketolithocholic_acid_ba;x3_dehydrocholic_acid_ba;chenodeoxycholic_acid_cdca_ba;cholic_acid_ca_ba	0.0017508
157	sphingobium;nocardia;arthrobacter;mesorhizobium;streptomyces;chromobacterium;tessaracoccus;acidovorax;achromobacter;cupriavidus	allolithocholic_acid_ba	0.00181967
158	jeongeupia	x3a_hydroxy_7_12_diketo_cholanic_acid_ba;x3a_hydroxy_12_ketolithocholic_acid_ba;x3_dehydrocholic_acid_ba;chenodeoxycholic_acid_cdca_ba;cholic_acid_ca_ba	0.00182424
159	methylovulum;micavibrio	allolithocholic_acid_ba	0.00183301
160	mitsuaria;dechloromonas;castellaniella;sulfurifustis	x3a_hydroxy_12_ketolithocholic_acid_ba;x3_dehydrocholic_acid_ba;chenodeoxycholic_acid_cdca_ba;cholic_acid_ca_ba	0.00184681
161	epibacterium;natrialba	x3_dehydrocholic_acid_ba;chenodeoxycholic_acid_cdca_ba;cholic_acid_ca_ba	0.00186157
162	ereboglobus;sagittula	allolithocholic_acid_ba;x3_6_diketocholanic_acid_ba;lithocholenic_acid_ba;x8_14_5b_cholenic_acid_3a_12a_diol_ba	0.00186787
163	halorhodospira	lithocholenic_acid_ba;x8_14_5b_cholenic_acid_3a_12a_diol_ba	0.00187634
164	myroides;polaribacter	propionate_s	0.00187634
165	haliangium;komagataeibacter;sulfuricella;hoeflea;rhodoplanes	x3a_hydroxy_7_12_diketo_cholanic_acid_ba;x3a_hydroxy_12_ketolithocholic_acid_ba;x3_dehydrocholic_acid_ba;chenodeoxycholic_acid_cdca_ba;cholic_acid_ca_ba	0.00187725
166	desulfococcus;azotobacter;rhodopseudomonas	tauro_w_muricholic_acid_tw_mca_ba	0.00188508
167	alkalilimnicola;desulfurivibrio;yangia;salipiger;euzebya;pseudoxanthomonas	lithocholenic_acid_ba;x8_14_5b_cholenic_acid_3a_12a_diol_ba	0.00190049
168	candidatus_promineofilum;desulfarculus	ursodeoxycholic_acid_udca_ba	0.00191591
169	agrobacterium;neorhizobium	allolithocholic_acid_ba	0.00191592
170	alkalilimnicola;desulfurivibrio;yangia;salipiger;euzebya;pseudoxanthomonas	taurocholic_acid_tca_ba	0.00192272
171	segniliparus	allolithocholic_acid_ba	0.00192595
172	pelagibacterium;wenzhouxiangella;fibrobacter;kyrpidia	succinate_s	0.00192863
173	citromicrobium;waddlia;alistipes;mucinivorans	taurochenodeoxycholic_acid_tcdca_ba;taurocholic_acid_tca_ba	0.00195979
174	curvibacter;catenulispora;faecalibacterium;natrinema;salinigranum;actinosynnema;auraticoccus	x3a_hydroxy_12_ketolithocholic_acid_ba;x3_dehydrocholic_acid_ba;chenodeoxycholic_acid_cdca_ba;cholic_acid_ca_ba	0.00196993
175	agrobacterium;neorhizobium	succinate_s	0.00198796
176	ensifer;lysobacter;salinicola;luteimonas;methylocystis;polaromonas;ralstonia;variovorax;paraburkholderia;burkholderia;massilia;pandoraea;azospira;thauera;desulfococcus;azotobacter;rhodopseudomonas	lithocholenic_acid_ba;x8_14_5b_cholenic_acid_3a_12a_diol_ba	0.0020065
177	actinoplanes;nocardiopsis	glycochenodeoxycholic_acid_gcdca_ba	0.0020065
178	thalassospira;allochromatium;sulfuriferula	succinate_s	0.00201639
179	nitratifractor	tauro_w_muricholic_acid_tw_mca_ba	0.00201745
180	thermanaerovibrio;gordonia;heliobacterium	succinate_s	0.0020176
181	micrococcus	glycocholic_acid_gca_ba	0.00202244
182	prauserella;thermovirga	tauro_w_muricholic_acid_tw_mca_ba	0.00202244
183	afipia	lithocholenic_acid_ba	0.00203436
184	microcoleus;rhodanobacter	x3a_hydroxy_12_ketolithocholic_acid_ba;x3_dehydrocholic_acid_ba;chenodeoxycholic_acid_cdca_ba;cholic_acid_ca_ba	0.00206618
185	paucimonas	glycine_p	0.0020805
186	epibacterium;natrialba	succinate_s	0.00211112
187	methanolinea	succinate_s	0.00212609
188	desulfatibacillum;syntrophomonas	x8_14_5b_cholenic_acid_3a_12a_diol_ba	0.00213779
189	desulfatibacillum;syntrophomonas	succinate_s	0.00216859
190	singulisphaera;libanicoccus;denitrobacterium;corynebacterium;olsenella	succinate_s	0.00216859
191	geobacillus;gloeobacter	x3a_hydroxy_12_ketolithocholic_acid_ba;x3_dehydrocholic_acid_ba;chenodeoxycholic_acid_cdca_ba;cholic_acid_ca_ba	0.00224829
192	alistipes;mucinivorans	glycochenodeoxycholic_acid_gcdca_ba	0.00226001
193	haematospirillum	isolithocholic_acid_ba;lithocholic_acid_ba	0.00239317
194	croceicoccus;prosthecochloris	succinate_s	0.00248404
195	micropruina;curtobacterium;microlunatus;niveispirillum;devosia;acidipropionibacterium;roseiflexus;cellulosimicrobium;methylorubrum;mycolicibacterium;paludisphaera;hyphomicrobium;rhodothermus;alicyclobacillus;chlorobaculum	taurocholic_acid_tca_ba	0.00249134
196	chloracidobacterium;spiribacter;adlercreutzia;methanothrix;desulfallas;stackebrandtia	allolithocholic_acid_ba	0.00249752
197	agrobacterium;neorhizobium	ursodeoxycholic_acid_udca_ba	0.00257751
198	marmoricola;modestobacter;thalassococcus;variibacter;rhizorhabdus;brevirhabdus;methylosinus	ursodeoxycholic_acid_udca_ba	0.00259247
199	niastella	taurochenodeoxycholic_acid_tcdca_ba;taurocholic_acid_tca_ba	0.00261397
200	agromyces;brevibacterium	tauro_w_muricholic_acid_tw_mca_ba	0.00264682
201	desulfatibacillum;syntrophomonas;thiolapillus;thermomonospora;aminomonas;moorella	lithocholenic_acid_ba	0.002664
202	caldisericum;methanobrevibacter	x3a_hydroxy_7_12_diketo_cholanic_acid_ba	0.00267357
203	sandaracinus;erythrobacter;luteitalea;myxococcus;sphingopyxis	tauro_w_muricholic_acid_tw_mca_ba;taurochenodeoxycholic_acid_tcdca_ba;taurocholic_acid_tca_ba	0.00273282
204	chelatococcus;thiomonas;alcanivorax;phreatobacter	taurocholic_acid_tca_ba	0.00276609
205	actinoplanes;nocardiopsis	glycocholic_acid_gca_ba	0.00276728
206	melittangium	taurocholic_acid_tca_ba	0.00277217
207	aminobacterium;natronococcus	succinate_s	0.0028023
208	ferrimonas	succinate_s	0.00281307
209	desulfocapsa;syntrophothermus	x3a_hydroxy_7_12_diketo_cholanic_acid_ba	0.00282861
210	micavibrio	lithocholenic_acid_ba	0.00284272
211	cohaesibacter	tauro_w_muricholic_acid_tw_mca_ba	0.00284272
212	chelatococcus;thiomonas;alcanivorax;phreatobacter	glycocholic_acid_gca_ba	0.00287439
213	marmoricola;modestobacter	tauro_w_muricholic_acid_tw_mca_ba	0.00288731
214	microbacterium;saccharomonospora;cystobacter;corallococcus;nocardioides	glycoursodeoxycholic_acid_gudca_ba;glycochenodeoxycholic_acid_gcdca_ba;glycocholic_acid_gca_ba	0.00288731
215	azorhizobium;celeribacter;rhodovulum;roseibacterium	allolithocholic_acid_ba	0.00292763
216	cronobacter	glycodeoxycholic_acid_gdca_ba;deoxycholic_acid_dca_ba;isolithocholic_acid_ba;lithocholic_acid_ba	0.00295234
217	confluentimicrobium	succinate_s;murocholic_acid_muro_ca_ba;ursodeoxycholic_acid_udca_ba;x3a_hydroxy_7_12_diketo_cholanic_acid_ba;x3a_hydroxy_12_ketolithocholic_acid_ba;x3_dehydrocholic_acid_ba;chenodeoxycholic_acid_cdca_ba;cholic_acid_ca_ba	0.00296063
218	tumebacillus	alanine_s	0.00304627
219	melittangium	tauro_w_muricholic_acid_tw_mca_ba	0.00305668
220	gluconobacter;jonquetella	succinate_s	0.00309149
221	rhodospirillum	lithocholenic_acid_ba;x8_14_5b_cholenic_acid_3a_12a_diol_ba	0.00310119
222	corallococcus;nocardioides	taurocholic_acid_tca_ba	0.00310444
223	aquiflexum;tateyamaria	succinate_s	0.00311252
224	microvirgula	succinate_s	0.00317452
225	pseudodesulfovibrio	succinate_s	0.00318204
226	thiohalobacter;stappia;sulfuricaulis	succinate_s	0.00322536
227	erythrobacter	ursodeoxycholic_acid_udca_ba	0.0032593
228	mobiluncus;propionimicrobium;pelagibaca;coraliomargarita;lacunisphaera	allolithocholic_acid_ba	0.00328884
229	nocardia	lithocholenic_acid_ba;x8_14_5b_cholenic_acid_3a_12a_diol_ba	0.00329282
230	halorhodospira	glycodeoxycholic_acid_gdca_ba	0.00332434
231	rhodovulum	x3a_hydroxy_7_12_diketo_cholanic_acid_ba;x3a_hydroxy_12_ketolithocholic_acid_ba;x3_dehydrocholic_acid_ba;chenodeoxycholic_acid_cdca_ba;cholic_acid_ca_ba	0.00335648
232	friedmanniella;sorangium;microbacterium;saccharomonospora;cystobacter;corallococcus;nocardioides	tauro_w_muricholic_acid_tw_mca_ba	0.00337619
233	blastococcus	lithocholenic_acid_ba;x8_14_5b_cholenic_acid_3a_12a_diol_ba	0.00339101
234	ketobacter	tauro_w_muricholic_acid_tw_mca_ba;taurochenodeoxycholic_acid_tcdca_ba;taurocholic_acid_tca_ba	0.00339155
235	candidatus_desulforudis	x3a_hydroxy_7_12_diketo_cholanic_acid_ba;x3a_hydroxy_12_ketolithocholic_acid_ba;x3_dehydrocholic_acid_ba;chenodeoxycholic_acid_cdca_ba;cholic_acid_ca_ba	0.003423
236	christensenella;dehalobacterium	ursodeoxycholic_acid_udca_ba	0.00344235
237	eikenella	allolithocholic_acid_ba	0.00346504
238	aromatoleum;leptospira;sphaerobacter;chelatococcus;thiomonas;alcanivorax;phreatobacter;sandaracinus;erythrobacter;luteitalea;myxococcus;sphingopyxis	glycochenodeoxycholic_acid_gcdca_ba	0.00347122
239	catenulispora	tryptophan_p	0.00347122
240	dinoroseobacter	ursodeoxycholic_acid_udca_ba	0.00348433
241	chlorobium	succinate_s	0.00352242
242	methanosalsum	x3a_hydroxy_7_12_diketo_cholanic_acid_ba;x3a_hydroxy_12_ketolithocholic_acid_ba;x3_dehydrocholic_acid_ba;chenodeoxycholic_acid_cdca_ba;cholic_acid_ca_ba	0.00352347
243	aminobacterium;natronococcus	allolithocholic_acid_ba	0.00357405
244	methylovulum;micavibrio	x8_14_5b_cholenic_acid_3a_12a_diol_ba	0.00357883
245	thermosediminibacter;fimbriimonas;pelobacter;desulfuromonas;paracoccus	allolithocholic_acid_ba	0.0036406
246	sandaracinus;erythrobacter;luteitalea;myxococcus;sphingopyxis	succinate_s	0.00365854
247	thermobispora	lithocholenic_acid_ba	0.00372231
248	rhizorhabdus	tauro_w_muricholic_acid_tw_mca_ba;taurochenodeoxycholic_acid_tcdca_ba;taurocholic_acid_tca_ba	0.00372668
249	candidatus_nitrosoglobus;paenarthrobacter	x3a_hydroxy_7_12_diketo_cholanic_acid_ba;x3a_hydroxy_12_ketolithocholic_acid_ba;x3_dehydrocholic_acid_ba;chenodeoxycholic_acid_cdca_ba;cholic_acid_ca_ba	0.00373234
250	salinibacter	lithocholenic_acid_ba	0.0037399
251	aquiflexum;tateyamaria	allolithocholic_acid_ba	0.00376768
252	porphyrobacter;allokutzneria;microcella	allolithocholic_acid_ba	0.00377205
253	jannaschia	x3a_hydroxy_7_12_diketo_cholanic_acid_ba;x3a_hydroxy_12_ketolithocholic_acid_ba;x3_dehydrocholic_acid_ba;chenodeoxycholic_acid_cdca_ba;cholic_acid_ca_ba	0.00381553
254	rhodobaca	tauro_w_muricholic_acid_tw_mca_ba	0.00385943
255	alkalilimnicola;desulfurivibrio;yangia;salipiger;euzebya;pseudoxanthomonas	tauro_w_muricholic_acid_tw_mca_ba	0.00389225
256	trichormus	x3a_hydroxy_12_ketolithocholic_acid_ba;x3_dehydrocholic_acid_ba;chenodeoxycholic_acid_cdca_ba;cholic_acid_ca_ba	0.00392106
257	kingella	glycoursocholanic_acid_ba	0.00399259
258	bosea;ottowia	x3_dehydrocholic_acid_ba;chenodeoxycholic_acid_cdca_ba;cholic_acid_ca_ba	0.00402805
259	stappia	x3a_hydroxy_7_12_diketo_cholanic_acid_ba;x3a_hydroxy_12_ketolithocholic_acid_ba;x3_dehydrocholic_acid_ba;chenodeoxycholic_acid_cdca_ba;cholic_acid_ca_ba	0.0040331
260	catenulispora;faecalibacterium	butyrate_s	0.00408323
261	chelatococcus;thiomonas;alcanivorax;phreatobacter	x3a_hydroxy_12_ketolithocholic_acid_ba;x3_dehydrocholic_acid_ba;chenodeoxycholic_acid_cdca_ba;cholic_acid_ca_ba	0.00409732
262	aeromicrobium;novosphingobium	tauro_w_muricholic_acid_tw_mca_ba	0.00410811
263	halostagnicola;chromohalobacter;kiritimatiella	allolithocholic_acid_ba	0.00413686
264	nitratifractor	x3a_hydroxy_7_12_diketo_cholanic_acid_ba;x3a_hydroxy_12_ketolithocholic_acid_ba;x3_dehydrocholic_acid_ba;chenodeoxycholic_acid_cdca_ba;cholic_acid_ca_ba	0.00413712
265	anderseniella	x3a_hydroxy_12_ketolithocholic_acid_ba	0.00414877
266	methanofollis;niabella	allolithocholic_acid_ba	0.00416048
267	jeongeupia	succinate_s	0.00416048
268	catenulispora;faecalibacterium	succinate_s	0.00417201
269	methanoculleus	hyodeoxycholic_acid_ba;glycodeoxycholic_acid_gdca_ba;deoxycholic_acid_dca_ba;isolithocholic_acid_ba;lithocholic_acid_ba	0.00417421
270	thiodictyon;sphingobium;nocardia;arthrobacter;mesorhizobium;streptomyces;chromobacterium;tessaracoccus;acidovorax;achromobacter;cupriavidus	ursodeoxycholic_acid_udca_ba	0.00419414
271	dinoroseobacter	x3a_hydroxy_12_ketolithocholic_acid_ba;x3_dehydrocholic_acid_ba;chenodeoxycholic_acid_cdca_ba;cholic_acid_ca_ba	0.00421393
272	friedmanniella	x5b_cholanic_acid_3b_12a_diol_ba	0.00421393
273	thermococcus;aeromonas;serinicoccus	cholic_acid_ca_ba	0.00422274
274	thermomonospora	murocholic_acid_muro_ca_ba;ursodeoxycholic_acid_udca_ba	0.00426986
275	hirschia	murocholic_acid_muro_ca_ba;ursodeoxycholic_acid_udca_ba	0.00428583
276	aminobacter	methylamine_s	0.00430025
277	methylophilus	lithocholenic_acid_ba;x8_14_5b_cholenic_acid_3a_12a_diol_ba	0.00430922
278	haliangium	tauro_w_muricholic_acid_tw_mca_ba;taurochenodeoxycholic_acid_tcdca_ba;taurocholic_acid_tca_ba	0.00435414
279	aurantimicrobium	x3a_hydroxy_12_ketolithocholic_acid_ba;x3_dehydrocholic_acid_ba;chenodeoxycholic_acid_cdca_ba;cholic_acid_ca_ba	0.00438538
280	sedimenticola	x3a_hydroxy_7_12_diketo_cholanic_acid_ba;x3a_hydroxy_12_ketolithocholic_acid_ba;x3_dehydrocholic_acid_ba;chenodeoxycholic_acid_cdca_ba;cholic_acid_ca_ba	0.00441783
281	haematospirillum	x8_14_5b_cholenic_acid_3a_12a_diol_ba	0.00447457
282	leisingera	ursodeoxycholic_acid_udca_ba	0.00448151
283	phreatobacter	tauro_w_muricholic_acid_tw_mca_ba	0.00457255
284	micavibrio	taurocholic_acid_tca_ba	0.00460319
285	catenulispora	phenylalanine_p;tyrosine_p	0.00464484
286	kineococcus;salinibacterium;pimelobacter;sinomonas;bradymonas;salinispora	glycocholic_acid_gca_ba	0.00468619
287	ruminiclostridium	succinate_s	0.00469666
288	methylobacterium	succinate_s	0.00470583
289	polymorphum	glycocholic_acid_gca_ba	0.00473378
290	borrelia	succinate_s	0.00473539
291	escherichia;shigella	x3a_hydroxy_12_ketolithocholic_acid_ba;x3_dehydrocholic_acid_ba;chenodeoxycholic_acid_cdca_ba;cholic_acid_ca_ba	0.0047457
292	hirschia	allolithocholic_acid_ba	0.0047457
293	blastococcus;kitasatospora	tauro_w_muricholic_acid_tw_mca_ba	0.00479996
294	thermodesulfobium	x5b_cholanic_acid_3b_12a_diol_ba	0.00481732
295	methylomonas	lithocholenic_acid_ba	0.00484656
296	cyclobacterium	glycoursodeoxycholic_acid_gudca_ba;glycochenodeoxycholic_acid_gcdca_ba;glycocholic_acid_gca_ba	0.00486201
297	methanofollis	lithocholenic_acid_ba	0.00487677
298	filomicrobium	lithocholenic_acid_ba;x8_14_5b_cholenic_acid_3a_12a_diol_ba	0.00488473
299	actinopolyspora	murocholic_acid_muro_ca_ba;ursodeoxycholic_acid_udca_ba;x3a_hydroxy_7_12_diketo_cholanic_acid_ba;x3a_hydroxy_12_ketolithocholic_acid_ba;x3_dehydrocholic_acid_ba;chenodeoxycholic_acid_cdca_ba;cholic_acid_ca_ba	0.00490718
300	niastella	glycochenodeoxycholic_acid_gcdca_ba	0.00490718
301	thermobispora	x8_14_5b_cholenic_acid_3a_12a_diol_ba	0.00495301
302	roseibacterium	ursodeoxycholic_acid_udca_ba	0.00510133
303	microvirgula	x3_dehydrocholic_acid_ba;chenodeoxycholic_acid_cdca_ba;cholic_acid_ca_ba	0.00511593
304	methylomonas;bdellovibrio;labrenzia;neisseria;magnetococcus;phaeobacter;nitrospirillum;salinibacter;microvirga;pseudarthrobacter	x8_14_5b_cholenic_acid_3a_12a_diol_ba	0.00520457
305	thiohalobacter	x3_dehydrocholic_acid_ba;chenodeoxycholic_acid_cdca_ba;cholic_acid_ca_ba	0.00521918
306	rhizorhabdus;brevirhabdus;methylosinus	glycochenodeoxycholic_acid_gcdca_ba	0.00526381
307	brevundimonas;intestinimonas	x3_6_diketocholanic_acid_ba	0.00527726
308	mucilaginibacter;runella	propionate_s	0.00527875
309	renibacterium	x3a_hydroxy_7_12_diketo_cholanic_acid_ba;x3a_hydroxy_12_ketolithocholic_acid_ba;x3_dehydrocholic_acid_ba;chenodeoxycholic_acid_cdca_ba;cholic_acid_ca_ba	0.00533413
310	proteus	lithocholenic_acid_ba	0.005363
311	anderseniella	tauro_w_muricholic_acid_tw_mca_ba;taurochenodeoxycholic_acid_tcdca_ba;taurocholic_acid_tca_ba	0.00543349
312	oxalobacter;mariprofundus;mycetocola	succinate_s	0.00543349
313	salinigranum	succinate_s	0.00543349
314	rhizobacter;rubrivivax;methylibium;thiobacillus	x3a_hydroxy_12_ketolithocholic_acid_ba;x3_dehydrocholic_acid_ba;chenodeoxycholic_acid_cdca_ba;cholic_acid_ca_ba	0.00546518
315	singulisphaera	allolithocholic_acid_ba	0.00554979
316	luteibacter	taurocholic_acid_tca_ba	0.00556205
317	halogeometricum;methanoculleus;hahella;pelodictyon;salinispira	succinate_s	0.00556709
318	stenotrophomonas;xanthomonas	glycochenodeoxycholic_acid_gcdca_ba;glycocholic_acid_gca_ba	0.00556709
319	asticcacaulis	allolithocholic_acid_ba	0.00568015
320	neisseria;magnetococcus;phaeobacter;nitrospirillum;salinibacter;microvirga;pseudarthrobacter	cholic_acid_ca_ba	0.00569962
321	morganella	deoxycholic_acid_dca_ba	0.00571513
322	euzebya	taurochenodeoxycholic_acid_tcdca_ba	0.00573152
323	paraburkholderia;burkholderia;massilia	taurocholic_acid_tca_ba	0.00580656
324	candidatus_desulforudis	allolithocholic_acid_ba	0.00582472
325	kribbella	glycochenodeoxycholic_acid_gcdca_ba;glycocholic_acid_gca_ba	0.00583154
326	paenarthrobacter	ursodeoxycholic_acid_udca_ba	0.00583243
327	chromohalobacter;kiritimatiella	succinate_s	0.00595369
328	halorhodospira;parvibaculum	x3a_hydroxy_12_ketolithocholic_acid_ba;x3_dehydrocholic_acid_ba;chenodeoxycholic_acid_cdca_ba;cholic_acid_ca_ba	0.00601477
329	agromyces;brevibacterium	allolithocholic_acid_ba	0.00601527
330	phycisphaera	allolithocholic_acid_ba	0.00601938
331	marichromatium	taurocholic_acid_tca_ba	0.00602509
332	brevefilum	x3a_hydroxy_7_12_diketo_cholanic_acid_ba	0.00609401
333	raoultella	deoxycholic_acid_dca_ba;isolithocholic_acid_ba;lithocholic_acid_ba	0.00612088
334	thiocystis	taurocholic_acid_tca_ba	0.00612983
335	escherichia;shigella	ursodeoxycholic_acid_udca_ba	0.00613335
336	microcoleus;rhodanobacter	ursodeoxycholic_acid_udca_ba	0.00614113
337	hyphomonas;salinisphaera	tauro_w_muricholic_acid_tw_mca_ba	0.0061553
338	actinosynnema	succinate_s	0.0061553
339	desulfotalea	x3a_hydroxy_12_ketolithocholic_acid_ba;x3_dehydrocholic_acid_ba;chenodeoxycholic_acid_cdca_ba;cholic_acid_ca_ba	0.00618329
340	melittangium;jiangella;marichromatium	murocholic_acid_muro_ca_ba;ursodeoxycholic_acid_udca_ba	0.00618944
341	aquiflexum;tateyamaria	x3a_hydroxy_12_ketolithocholic_acid_ba;x3_dehydrocholic_acid_ba;chenodeoxycholic_acid_cdca_ba;cholic_acid_ca_ba	0.00620799
342	dyadobacter	tauro_w_muricholic_acid_tw_mca_ba;taurochenodeoxycholic_acid_tcdca_ba;taurocholic_acid_tca_ba	0.00621119
343	chromohalobacter;kiritimatiella	x3a_hydroxy_12_ketolithocholic_acid_ba;x3_dehydrocholic_acid_ba;chenodeoxycholic_acid_cdca_ba;cholic_acid_ca_ba	0.00622168
344	thermosynechococcus;tistrella	glycoursodeoxycholic_acid_gudca_ba;glycochenodeoxycholic_acid_gcdca_ba;glycocholic_acid_gca_ba	0.00624496
345	methylovulum	x3a_hydroxy_7_12_diketo_cholanic_acid_ba;x3a_hydroxy_12_ketolithocholic_acid_ba;x3_dehydrocholic_acid_ba;chenodeoxycholic_acid_cdca_ba;cholic_acid_ca_ba	0.00624594
346	orrella	x5b_cholenic_acid_7a_ol_3_one_ba;allolithocholic_acid_ba;x3_6_diketocholanic_acid_ba;lithocholenic_acid_ba;x8_14_5b_cholenic_acid_3a_12a_diol_ba;hyodeoxycholic_acid_ba;glycodeoxycholic_acid_gdca_ba;deoxycholic_acid_dca_ba;isolithocholic_acid_ba;lithocholic_acid_ba	0.00626886
347	tumebacillus	glycoursodeoxycholic_acid_gudca_ba	0.00630739
348	pararhodospirillum	x5a_cholanic_acid_3a_ol_6_one_ba	0.00635945
349	sulfuricaulis	allolithocholic_acid_ba	0.00646243
350	vitreoscilla	succinate_s	0.00651093
351	kosakonia	taurodeoxycholic_acid_tdca_ba	0.00651326
352	variibacter	taurochenodeoxycholic_acid_tcdca_ba	0.00653489
353	roseomonas	allolithocholic_acid_ba	0.00659031
354	auraticoccus	x5b_cholanic_acid_3b_12a_diol_ba	0.00662318
355	murdochiella	succinate_s;murocholic_acid_muro_ca_ba;ursodeoxycholic_acid_udca_ba;x3a_hydroxy_7_12_diketo_cholanic_acid_ba;x3a_hydroxy_12_ketolithocholic_acid_ba;x3_dehydrocholic_acid_ba;chenodeoxycholic_acid_cdca_ba;cholic_acid_ca_ba	0.00665396
356	mycobacterium;pseudomonas;geobacter;azospirillum;halomonas	glycochenodeoxycholic_acid_gcdca_ba;glycocholic_acid_gca_ba	0.00667298
357	desulfobacca	succinate_s	0.0066993
358	methyloversatilis	allolithocholic_acid_ba	0.0066993
359	melittangium	lithocholenic_acid_ba	0.00671508
360	paludisphaera	glycochenodeoxycholic_acid_gcdca_ba;glycocholic_acid_gca_ba	0.00673491
361	dyadobacter	glycochenodeoxycholic_acid_gcdca_ba;glycocholic_acid_gca_ba	0.00680563
362	cohaesibacter	x8_14_5b_cholenic_acid_3a_12a_diol_ba	0.00681038
363	chelativorans;polymorphum;sphingomonas	glycochenodeoxycholic_acid_gcdca_ba	0.00681038
364	castellaniella;sulfurifustis	isolithocholic_acid_ba;lithocholic_acid_ba	0.006821
365	halogeometricum;methanoculleus	allolithocholic_acid_ba	0.0068511
366	halomicronema	x5b_cholanic_acid_3a_6a_diol_7_one_ba	0.00686966
367	citrobacter;methanococcoides	allolithocholic_acid_ba	0.00687561
368	dechloromonas;castellaniella;sulfurifustis	allolithocholic_acid_ba	0.00687561
369	agrobacterium;neorhizobium	lithocholenic_acid_ba	0.00689058
370	ectothiorhodospira	glycine_p	0.00689744
371	geitlerinema;geodermatophilus;actinopolymorpha;ketogulonicigenium	allolithocholic_acid_ba	0.00691775
372	stappia	ursodeoxycholic_acid_udca_ba	0.00695808
373	niabella	taurochenodeoxycholic_acid_tcdca_ba;taurocholic_acid_tca_ba	0.00696033
374	kutzneria;simplicispira	lithocholenic_acid_ba;x8_14_5b_cholenic_acid_3a_12a_diol_ba	0.00696074
375	eubacterium	butyrate_s	0.00697176
376	tepidanaerobacter;thermotoga;turicibacter	butyrate_s	0.00703319
377	azoarcus	hyodeoxycholic_acid_ba;glycodeoxycholic_acid_gdca_ba;deoxycholic_acid_dca_ba;isolithocholic_acid_ba;lithocholic_acid_ba	0.00711255
378	roseburia	butyrate_s	0.00711255
379	pannonibacter;phoenicibacter	x3_dehydrocholic_acid_ba	0.00716224
380	isosphaera	allolithocholic_acid_ba	0.00720124
381	afipia	x3_6_diketocholanic_acid_ba	0.00721392
382	dyella	cholic_acid_ca_ba	0.00722759
383	turneriella	allolithocholic_acid_ba	0.00723496
384	zhongshania	x3a_12a_23_nordeoxycholic_acid_ba	0.00726759
385	geobacillus;gloeobacter	tauro_w_muricholic_acid_tw_mca_ba	0.00728094
386	haloplanus	tauro_w_muricholic_acid_tw_mca_ba	0.00733428
387	chloroherpeton	x3a_hydroxy_12_ketolithocholic_acid_ba;x3_dehydrocholic_acid_ba;chenodeoxycholic_acid_cdca_ba;cholic_acid_ca_ba	0.00734555
388	pimelobacter	glycochenodeoxycholic_acid_gcdca_ba	0.00734555
389	jatrophihabitans;kytococcus	glycoursodeoxycholic_acid_gudca_ba;glycochenodeoxycholic_acid_gcdca_ba;glycocholic_acid_gca_ba	0.00739483
390	mageeibacillus	ursodeoxycholic_acid_udca_ba	0.00756589
391	micrococcus	glycochenodeoxycholic_acid_gcdca_ba	0.00757331
392	plantactinospora;gemmata;vulgatibacter;jatrophihabitans;kytococcus	tauro_w_muricholic_acid_tw_mca_ba	0.00757331
393	bradymonas;salinispora	x8_14_5b_cholenic_acid_3a_12a_diol_ba	0.00758406
394	defluviimonas;leptothrix	allolithocholic_acid_ba	0.0076719
395	methylobacillus;haliangium;komagataeibacter;sulfuricella;hoeflea;rhodoplanes	allolithocholic_acid_ba	0.00767928
396	starkeya	succinate_s	0.00769549
397	variibacter	tauro_w_muricholic_acid_tw_mca_ba	0.00770369
398	brevirhabdus	glycocholic_acid_gca_ba	0.00770997
399	morganella	taurodeoxycholic_acid_tdca_ba	0.00771028
400	desulfobacca	cholic_acid_ca_ba	0.00775565
401	kineococcus;salinibacterium;pimelobacter;sinomonas;bradymonas;salinispora	allolithocholic_acid_ba	0.00775565
402	cohaesibacter	glycodeoxycholic_acid_gdca_ba	0.00776504
403	mitsuaria	lithocholenic_acid_ba;x8_14_5b_cholenic_acid_3a_12a_diol_ba	0.00788489
404	sinorhizobium;cloacibacillus;opitutus	glycochenodeoxycholic_acid_gcdca_ba;glycocholic_acid_gca_ba	0.00788965
405	altererythrobacter;magnetospirillum;rhodococcus;anaeromyxobacter;caulobacter;frankia;bradyrhizobium;micromonospora	x3_6_diketocholanic_acid_ba	0.0078984
406	croceicoccus;prosthecochloris	allolithocholic_acid_ba	0.00792623
407	pararhodospirillum	x8_14_5b_cholenic_acid_3a_12a_diol_ba	0.00794183
408	archangium;caldilinea	x3_6_diketocholanic_acid_ba	0.00794183
409	variibacter	taurocholic_acid_tca_ba	0.00795452
410	beijerinckia	glycochenodeoxycholic_acid_gcdca_ba;glycocholic_acid_gca_ba	0.00800779
411	agarilytica;coprothermobacter	x3a_hydroxy_12_ketolithocholic_acid_ba;x3_dehydrocholic_acid_ba;chenodeoxycholic_acid_cdca_ba;cholic_acid_ca_ba	0.00801667
412	luteipulveratus	x3a_hydroxy_7_12_diketo_cholanic_acid_ba;x3a_hydroxy_12_ketolithocholic_acid_ba;x3_dehydrocholic_acid_ba;chenodeoxycholic_acid_cdca_ba;cholic_acid_ca_ba	0.00802295
413	parvularcula	taurochenodeoxycholic_acid_tcdca_ba;taurocholic_acid_tca_ba	0.00805702
414	ereboglobus;sagittula	tauro_w_muricholic_acid_tw_mca_ba	0.00810446
415	faecalibaculum	ursodeoxycholic_acid_udca_ba	0.00812684
416	thiocystis	taurochenodeoxycholic_acid_tcdca_ba	0.00820669
417	marinithermus	taurocholic_acid_tca_ba	0.00820669
418	sanguibacter;segniliparus	glycochenodeoxycholic_acid_gcdca_ba	0.00821914
419	euzebya;pseudoxanthomonas	glycochenodeoxycholic_acid_gcdca_ba;glycocholic_acid_gca_ba	0.00821914
420	gordonibacter	lithocholenic_acid_ba;x8_14_5b_cholenic_acid_3a_12a_diol_ba	0.00823594
421	croceicoccus	lithocholenic_acid_ba	0.00824115
422	entomoplasma	glycochenodeoxycholic_acid_gcdca_ba;glycocholic_acid_gca_ba	0.00824115
423	parabacteroides	propionate_s	0.00830338
424	thermotoga	x3a_hydroxy_7_12_diketo_cholanic_acid_ba;x3a_hydroxy_12_ketolithocholic_acid_ba;x3_dehydrocholic_acid_ba;chenodeoxycholic_acid_cdca_ba;cholic_acid_ca_ba	0.00833601
425	pseudarcicella	allolithocholic_acid_ba	0.00838745
426	mycobacteroides	succinate_s	0.00838745
427	azoarcus	allolithocholic_acid_ba	0.00839982
428	croceicoccus	ursodeoxycholic_acid_udca_ba	0.0084097
429	antarctobacter	allolithocholic_acid_ba	0.00845516
430	isosphaera;pseudohongiella	tauro_w_muricholic_acid_tw_mca_ba	0.00845516
431	zunongwangia	methylamine_s	0.00848878
432	azotobacter;rhodopseudomonas	ursodeoxycholic_acid_udca_ba	0.00849531
433	agromyces;brevibacterium	taurocholic_acid_tca_ba	0.00851471
434	methylacidiphilum	taurochenodeoxycholic_acid_tcdca_ba;taurocholic_acid_tca_ba	0.00855646
435	immundisolibacter	x5b_cholanic_acid_3b_12a_diol_ba	0.00855646
436	oscillatoria	lithocholic_acid_ba	0.00857182
437	phycisphaera	succinate_s	0.00862097
438	asticcacaulis	tauro_w_muricholic_acid_tw_mca_ba	0.00862287
439	magnetospira;rathayibacter;vogesella	x3_dehydrocholic_acid_ba	0.00864646
440	sulfuricaulis	tauro_w_muricholic_acid_tw_mca_ba	0.00872505
441	leptothrix	lithocholenic_acid_ba;x8_14_5b_cholenic_acid_3a_12a_diol_ba	0.00879057
442	citrobacter;methanococcoides	tauro_w_muricholic_acid_tw_mca_ba	0.00881999
443	geobacter	allolithocholic_acid_ba	0.00883176
444	desulfurella;mycolicibacter;roseburia;beutenbergia;cnuibacter;geobacillus;gloeobacter	succinate_s	0.00883522
445	sulfuricurvum	glycochenodeoxycholic_acid_gcdca_ba;glycocholic_acid_gca_ba	0.0088578
446	desulfomicrobium;desulfovibrio	taurocholic_acid_tca_ba	0.00895324
447	orrella	ursodeoxycholic_acid_udca_ba	0.00897914
448	kitasatospora	x5b_cholanic_acid_3b_12a_diol_ba	0.00898166
449	prauserella;thermovirga	ursodeoxycholic_acid_udca_ba	0.00898332
450	stigmatella	lithocholenic_acid_ba;x8_14_5b_cholenic_acid_3a_12a_diol_ba	0.00899787
451	dichelobacter;herminiimonas	allolithocholic_acid_ba	0.0090431
452	acidiphilium	taurocholic_acid_tca_ba	0.0090431
453	wigglesworthia	lithocholenic_acid_ba	0.00905569
454	geobacillus;gloeobacter	allolithocholic_acid_ba	0.00914328
455	oscillatoria	isolithocholic_acid_ba	0.00922152
456	gramella;leadbetterella	propionate_s	0.00924554
457	candidatus_phycorickettsia	x3a_hydroxy_12_ketolithocholic_acid_ba	0.0092804
458	desulfatibacillum;syntrophomonas	ursodeoxycholic_acid_udca_ba	0.00930671
459	kineococcus;salinibacterium	glycochenodeoxycholic_acid_gcdca_ba	0.00936837
460	ottowia	lithocholenic_acid_ba	0.00936837
461	microcoleus	glycochenodeoxycholic_acid_gcdca_ba;glycocholic_acid_gca_ba	0.009391
462	devosia;acidipropionibacterium;roseiflexus	glycoursodeoxycholic_acid_gudca_ba	0.00941221
463	niveispirillum	glycoursodeoxycholic_acid_gudca_ba	0.00951414
464	roseomonas	tauro_w_muricholic_acid_tw_mca_ba	0.00955757
465	gloeomargarita	deoxycholic_acid_dca_ba;isolithocholic_acid_ba;lithocholic_acid_ba	0.00955817
466	azospira;thauera	ursodeoxycholic_acid_udca_ba	0.00956419
467	methylobacterium	x3a_hydroxy_7_12_diketo_cholanic_acid_ba;x3a_hydroxy_12_ketolithocholic_acid_ba;x3_dehydrocholic_acid_ba;chenodeoxycholic_acid_cdca_ba;cholic_acid_ca_ba	0.00960878
468	thiomicrospira	succinate_s	0.00963386
469	saccharothrix	x3_dehydrocholic_acid_ba;chenodeoxycholic_acid_cdca_ba;cholic_acid_ca_ba	0.00964172
470	morganella	glycodeoxycholic_acid_gdca_ba	0.00967316
471	candidatus_kuenenia	butyrate_s	0.00969214
472	afipia	isolithocholic_acid_ba;lithocholic_acid_ba	0.00971895
473	haloplanus	aspartate_s	0.00973335
474	gordonibacter	allolithocholic_acid_ba	0.00974451
475	mucinivorans	formate_p	0.00975988
476	marinobacter	x3a_hydroxy_7_12_diketo_cholanic_acid_ba;x3a_hydroxy_12_ketolithocholic_acid_ba;x3_dehydrocholic_acid_ba;chenodeoxycholic_acid_cdca_ba;cholic_acid_ca_ba	0.00976699
477	haloterrigena	x3_dehydrocholic_acid_ba;chenodeoxycholic_acid_cdca_ba;cholic_acid_ca_ba	0.00979873
478	ralstonia;variovorax;paraburkholderia;burkholderia;massilia	tauro_w_muricholic_acid_tw_mca_ba	0.00989346
479	antarctobacter	x3_6_diketocholanic_acid_ba	0.00994541
480	xanthomonas	ursodeoxycholic_acid_udca_ba	0.010004220240794578
481	marinobacterium	succinate_s	0.010040946700335193
482	haloterrigena	murocholic_acid_muro_ca_ba;ursodeoxycholic_acid_udca_ba	0.0100915
483	anaerolinea	succinate_s	0.010102433669788578
484	nitrosomonas	succinate_s	0.010161
485	kribbella	taurocholic_acid_tca_ba	0.0101927
486	brevefilum	murocholic_acid_muro_ca_ba	0.010206228948049583
487	halopiger	glycochenodeoxycholic_acid_gcdca_ba;glycocholic_acid_gca_ba	0.010208949158560477
488	candidatus_blochmannia	deoxycholic_acid_dca_ba;isolithocholic_acid_ba;lithocholic_acid_ba	0.010244990745245484
489	thioflavicoccus	taurochenodeoxycholic_acid_tcdca_ba;taurocholic_acid_tca_ba	0.010244990745245484
490	desulfococcus;azotobacter;rhodopseudomonas	taurocholic_acid_tca_ba	0.010244990745245484
491	simplicispira	x5b_cholanic_acid_3b_12a_diol_ba	0.010244990745245484
492	ruminiclostridium	ursodeoxycholic_acid_udca_ba	0.010244990745245484
493	alistipes;mucinivorans	succinate_s	0.010256963986622701
494	serinicoccus	x3_dehydrocholic_acid_ba	0.010270223573269661
495	magnetospirillum	glycoursodeoxycholic_acid_gudca_ba	0.010368262972318146
496	providencia	glycodeoxycholic_acid_gdca_ba	0.010375117786488868
497	gallionella	glycine_p	0.0103966
498	octadecabacter	x3_dehydrocholic_acid_ba	0.010429788466436034
499	chroococcidiopsis	x3a_hydroxy_7_12_diketo_cholanic_acid_ba	0.010431271350424348
500	microbacterium;saccharomonospora;cystobacter;corallococcus;nocardioides	x5b_cholanic_acid_3b_12a_diol_ba	0.010485952345766722
501	halorhodospira;parvibaculum	tauro_w_muricholic_acid_tw_mca_ba;taurochenodeoxycholic_acid_tcdca_ba;taurocholic_acid_tca_ba	0.0104909
502	thermus;limnochorda;meiothermus	x5b_cholanic_acid_3b_12a_diol_ba	0.010527752916665653
503	acetomicrobium	glycine_p	0.010538214788914436
504	fibrella;hymenobacter	succinate_s	0.010538439751170333
505	fastidiosipila	tryptophan_p	0.010618134792781862
506	mycobacteroides	glycocholic_acid_gca_ba	0.010639642900504613
507	neisseria	x3_dehydrocholic_acid_ba	0.010650686920858507
508	halotalea;methyloversatilis;dyella;thioflavicoccus	x3_dehydrocholic_acid_ba	0.010696875125628846
509	natronobacterium	propionate_s	0.010742067053427548
510	marmoricola;modestobacter	taurocholic_acid_tca_ba	0.010742067053427548
511	sulfuricurvum	citrate_p	0.010787429992712831
512	acidiphilium	x3_6_diketocholanic_acid_ba	0.010819
513	aurantimicrobium	succinate_s	0.010964513224024372
514	entomoplasma	glycoursodeoxycholic_acid_gudca_ba	0.010977033629039408
515	micavibrio	tauro_w_muricholic_acid_tw_mca_ba	0.011015507354200465
516	blastococcus	x5a_cholanic_acid_3a_ol_6_one_ba	0.011076331579718594
517	auraticoccus	glycoursodeoxycholic_acid_gudca_ba	0.011085971814384832
518	thermincola	glycocholic_acid_gca_ba	0.011135510495304068
519	christensenella;dehalobacterium	succinate_s	0.011160982706307537
520	actinopolymorpha	x8_14_5b_cholenic_acid_3a_12a_diol_ba	0.011175520323255105
521	amycolatopsis;deinococcus;gemmatirosa;altererythrobacter;magnetospirillum;rhodococcus;anaeromyxobacter;caulobacter;frankia;bradyrhizobium;micromonospora	glycochenodeoxycholic_acid_gcdca_ba	0.011180671990659927
522	haloferax	deoxycholic_acid_dca_ba	0.0112415
523	gemmobacter	x5b_cholanic_acid_3a_6a_diol_7_one_ba	0.011292
524	methanoculleus	x3_dehydrocholic_acid_ba;chenodeoxycholic_acid_cdca_ba;cholic_acid_ca_ba	0.011411581239265325
525	denitrovibrio;methanohalophilus	glycoursocholanic_acid_ba	0.011411581239265325
526	sulfitobacter	aspartate_s	0.011572223211130347
527	thermovirga	taurocholic_acid_tca_ba	0.011620854269854727
528	azorhizobium;celeribacter	lithocholenic_acid_ba;x8_14_5b_cholenic_acid_3a_12a_diol_ba	0.011620854269854727
529	blastomonas	allolithocholic_acid_ba	0.011620854269854727
530	thermincola	succinate_s	0.011667693463958205
531	gemmatirosa	glycocholic_acid_gca_ba	0.011677342031539428
532	prevotella	glycochenodeoxycholic_acid_gcdca_ba;glycocholic_acid_gca_ba	0.011687557661308873
533	marichromatium	tauro_w_muricholic_acid_tw_mca_ba	0.011700664827278998
534	thermincola	x3_dehydrocholic_acid_ba	0.011763650125574397
535	maricaulis	allolithocholic_acid_ba	0.011779729327212782
536	candidatus_promineofilum;desulfarculus	tauro_w_muricholic_acid_tw_mca_ba	0.011852990692587254
537	candidatus_desulforudis	ursodeoxycholic_acid_udca_ba	0.011871998918540507
538	segniliparus	taurocholic_acid_tca_ba	0.011967208422147376
539	porphyromonas	glycochenodeoxycholic_acid_gcdca_ba	0.012018889453572743
540	dehalogenimonas	taurocholic_acid_tca_ba	0.012043732547243538
541	plantactinospora;gemmata;vulgatibacter;jatrophihabitans;kytococcus	x5b_cholanic_acid_3b_12a_diol_ba	0.012094834433699702
542	turneriella	tauro_w_muricholic_acid_tw_mca_ba	0.012139810060481582
543	brevirhabdus;methylosinus	taurocholic_acid_tca_ba	0.012139810060481582
544	nitratifractor	taurocholic_acid_tca_ba	0.012139810060481582
545	desulfatibacillum	taurocholic_acid_tca_ba	0.0121587
546	acetobacterium	glycoursocholanic_acid_ba	0.012174206208563297
547	asticcacaulis	succinate_s	0.0122034
548	niastella	x3a_hydroxy_7_12_diketo_cholanic_acid_ba;x3a_hydroxy_12_ketolithocholic_acid_ba;x3_dehydrocholic_acid_ba;chenodeoxycholic_acid_cdca_ba;cholic_acid_ca_ba	0.012204635574605285
549	providencia	deoxycholic_acid_dca_ba	0.012244295038337964
550	pajaroellobacter	succinate_s	0.012244295038337964
551	aquabacterium	succinate_s	0.012244295038337964
552	cycloclasticus	glycoursocholanic_acid_ba	0.012316186445396168
553	halostagnicola;chromohalobacter;kiritimatiella	lithocholenic_acid_ba	0.012319989498106561
554	barnesiella	aspartate_s	0.012374357967919292
555	dyella;thioflavicoccus	lithocholenic_acid_ba	0.012395263612924002
556	candidatus_koribacter	succinate_s	0.012557991212569774
557	azospirillum	allolithocholic_acid_ba	0.012557991212569774
558	desulfitobacterium	x3a_hydroxy_12_ketolithocholic_acid_ba;x3_dehydrocholic_acid_ba;chenodeoxycholic_acid_cdca_ba;cholic_acid_ca_ba	0.012569035416860773
559	afipia	x5b_cholanic_acid_3a_6a_diol_7_one_ba	0.0126089
560	cystobacter	x3_6_diketocholanic_acid_ba	0.012682002754096599
561	thermotoga	glycoursocholanic_acid_ba	0.012682002754096599
562	belliella	x5b_cholenic_acid_7a_ol_3_one_ba	0.012741433257584938
563	mycolicibacter	glycoursodeoxycholic_acid_gudca_ba	0.012827736544586122
564	turneriella	glycine_p	0.0128291
565	oceanimonas	phenylalanine_p;tyrosine_p	0.012891451784904346
566	gloeobacter	murocholic_acid_muro_ca_ba	0.012967837605308962
567	herminiimonas	x3_dehydrocholic_acid_ba;chenodeoxycholic_acid_cdca_ba;cholic_acid_ca_ba	0.013150340576531125
568	aminomonas;moorella	succinate_s	0.013232712381982622
569	moorella	murocholic_acid_muro_ca_ba;ursodeoxycholic_acid_udca_ba	0.0132432
570	sphingorhabdus	chenodeoxycholic_acid_cdca_ba;cholic_acid_ca_ba	0.0133968
571	dehalogenimonas	x3_dehydrocholic_acid_ba	0.013420451625538158
572	alloactinosynnema	allolithocholic_acid_ba	0.013450371802130903
573	acetomicrobium	chenodeoxycholic_acid_cdca_ba;cholic_acid_ca_ba	0.013474821532978598
574	haliangium;komagataeibacter;sulfuricella;hoeflea;rhodoplanes	ursodeoxycholic_acid_udca_ba	0.013544507133241047
575	azorhizobium	taurocholic_acid_tca_ba	0.0135992
576	anderseniella	x3_dehydrocholic_acid_ba	0.013607317840858345
577	tolumonas	glycoursodeoxycholic_acid_gudca_ba	0.013607317840858345
578	pannonibacter	lithocholenic_acid_ba;x8_14_5b_cholenic_acid_3a_12a_diol_ba	0.013616868298058037
579	sideroxydans	lithocholenic_acid_ba;x8_14_5b_cholenic_acid_3a_12a_diol_ba	0.013627708481141358
580	dyella	succinate_s	0.013671112250097848
581	siansivirga	allolithocholic_acid_ba	0.013750574955474527
582	curvibacter;catenulispora;faecalibacterium	x5b_cholanic_acid_3b_12a_diol_ba	0.013750574955474527
583	ehrlichia	x3a_hydroxy_7_12_diketo_cholanic_acid_ba	0.013816095688195501
584	ruegeria	x3_dehydrocholic_acid_ba	0.013834327425695993
585	janibacter	x3_dehydrocholic_acid_ba	0.013834327425695993
586	candidatus_hamiltonella;candidatus_hoaglandella	x3_dehydrocholic_acid_ba;chenodeoxycholic_acid_cdca_ba;cholic_acid_ca_ba	0.013838729164330153
587	mycobacterium;pseudomonas;geobacter;azospirillum;halomonas	ursodeoxycholic_acid_udca_ba	0.013860658637681437
588	limnohabitans	glutamine_s	0.013861125664536018
589	methanocella	succinate_s	0.013862195930003988
590	sulfuricurvum	lithocholenic_acid_ba	0.013903613285190923
591	aquifex;candidatus_fonsibacter;candidatus_phycorickettsia;candidatus_cloacimonas;petrotoga	x3a_hydroxy_7_12_diketo_cholanic_acid_ba	0.0139073
592	dialister;negativicoccus	x3_dehydrocholic_acid_ba	0.013918083683038122
593	amycolatopsis	x3_6_diketocholanic_acid_ba	0.013919111627660477
594	thermobaculum	x3a_hydroxy_12_ketolithocholic_acid_ba;x3_dehydrocholic_acid_ba;chenodeoxycholic_acid_cdca_ba;cholic_acid_ca_ba	0.013975253057703503
595	candidatus_phycorickettsia	x3_dehydrocholic_acid_ba	0.013991608909521225
596	jannaschia	ursodeoxycholic_acid_udca_ba	0.014053653348382784
597	persephonella	x3a_12a_23_nordeoxycholic_acid_ba	0.014058413566283142
598	congregibacter;ketobacter	glycocholic_acid_gca_ba	0.014058413566283142
599	thermomonospora	tauro_w_muricholic_acid_tw_mca_ba	0.0140667
600	oxalobacter	x3a_hydroxy_7_12_diketo_cholanic_acid_ba;x3a_hydroxy_12_ketolithocholic_acid_ba;x3_dehydrocholic_acid_ba;chenodeoxycholic_acid_cdca_ba;cholic_acid_ca_ba	0.014108224764602984
601	parvibaculum	murocholic_acid_muro_ca_ba;ursodeoxycholic_acid_udca_ba	0.014142429819773305
602	desulfotalea	allolithocholic_acid_ba	0.014168934219818574
603	ereboglobus;sagittula	taurocholic_acid_tca_ba	0.0143343
604	halobacterium	lithocholenic_acid_ba	0.014400635554499636
605	methanococcoides	x5b_cholanic_acid_3b_12a_diol_ba	0.014507051368635714
606	methanosphaerula	glycoursodeoxycholic_acid_gudca_ba	0.014507051368635714
607	thermincola	cholic_acid_ca_ba	0.014507051368635714
608	magnetospira	x3a_hydroxy_12_ketolithocholic_acid_ba	0.014507051368635714
609	candidatus_accumulibacter	x8_14_5b_cholenic_acid_3a_12a_diol_ba	0.014551
610	pararhodospirillum	taurocholic_acid_tca_ba	0.014636120028929573
611	thermovibrio	ursodeoxycholic_acid_udca_ba	0.014660699250164186
612	halalkalicoccus;halorientalis	succinate_s	0.014696781200846434
613	catenulispora	allolithocholic_acid_ba;x3_6_diketocholanic_acid_ba;lithocholenic_acid_ba;x8_14_5b_cholenic_acid_3a_12a_diol_ba	0.014696781200846434
614	segniliparus	tauro_w_muricholic_acid_tw_mca_ba	0.014696781200846434
615	nitratifractor	succinate_s	0.014711259457681864
616	glaciecola	x3_hydroxyisovalerate_p	0.014727249383863977
617	catenulispora	glycochenodeoxycholic_acid_gcdca_ba;glycocholic_acid_gca_ba	0.0147903
618	corallococcus	taurochenodeoxycholic_acid_tcdca_ba	0.0147903
619	beijerinckia	succinate_s	0.014798545172486195
620	aquaspirillum;delftia	allolithocholic_acid_ba	0.014817143427435635
621	haliangium;komagataeibacter;sulfuricella;hoeflea;rhodoplanes	succinate_s	0.0148515
622	cobetia	tauro_w_muricholic_acid_tw_mca_ba	0.014891551522402187
623	phenylobacterium;streptosporangium	x5b_cholanic_acid_3b_12a_diol_ba	0.014925465845737089
624	beutenbergia	glycoursodeoxycholic_acid_gudca_ba	0.014927851883515095
625	odoribacter	hyodeoxycholic_acid_ba	0.014961115631259772
626	paraburkholderia;burkholderia;massilia	ursodeoxycholic_acid_udca_ba	0.014969447661701364
627	desulfomicrobium;desulfovibrio	x3_dehydrocholic_acid_ba	0.015004367585615703
628	sulfuricurvum	allolithocholic_acid_ba	0.0150164
629	thermobifida	glycoursodeoxycholic_acid_gudca_ba	0.0150164
630	neisseria	chenodeoxycholic_acid_cdca_ba	0.015075700165443144
631	ruegeria	ursodeoxycholic_acid_udca_ba	0.015078517944046032
632	actinopolymorpha	tauro_w_muricholic_acid_tw_mca_ba	0.015102684715120057
633	ruminiclostridium	allolithocholic_acid_ba	0.0152992
634	halobacterium	allolithocholic_acid_ba	0.015321840108792548
635	neorhizobium	x8_14_5b_cholenic_acid_3a_12a_diol_ba	0.015332958481236987
636	sideroxydans	taurochenodeoxycholic_acid_tcdca_ba;taurocholic_acid_tca_ba	0.015340482311099853
637	nitratireductor	x8_14_5b_cholenic_acid_3a_12a_diol_ba	0.015452560383632963
638	brevirhabdus	tauro_w_muricholic_acid_tw_mca_ba	0.015452560383632963
639	asaia	x3_dehydrocholic_acid_ba	0.015533494530342964
640	pararhodospirillum	succinate_s	0.015533494530342964
641	sulfuriferula	tauro_w_muricholic_acid_tw_mca_ba	0.015562359670149675
642	microlunatus	glycochenodeoxycholic_acid_gcdca_ba;glycocholic_acid_gca_ba	0.015572700997960506
643	trueperella	glycocholic_acid_gca_ba	0.0155893
644	pseudodesulfovibrio	glycolithocholic_acid_glca_ba	0.015621551073848484
645	thermobaculum	allolithocholic_acid_ba	0.0157583
646	candidatus_hamiltonella	deoxycholic_acid_dca_ba;isolithocholic_acid_ba;lithocholic_acid_ba	0.015876909685052475
647	rathayibacter;vogesella	ursodeoxycholic_acid_udca_ba	0.015898207485999745
648	zhongshania	tauro_w_muricholic_acid_tw_mca_ba	0.016046
649	methylacidiphilum	tryptophan_p	0.016074237985688106
650	chlorobium	deoxycholic_acid_dca_ba	0.0160773
651	pararhodospirillum	allolithocholic_acid_ba	0.016077949841753945
652	methanolobus	tauro_w_muricholic_acid_tw_mca_ba	0.016103743503787953
653	starkeya	x3_dehydrocholic_acid_ba;chenodeoxycholic_acid_cdca_ba;cholic_acid_ca_ba	0.016118400584482107
654	epibacterium	methylamine_s	0.016128377476582613
655	dyella;thioflavicoccus	x3a_hydroxy_12_ketolithocholic_acid_ba	0.016165775028797822
656	mariprofundus	allolithocholic_acid_ba	0.016188705157632828
657	natronobacterium	murocholic_acid_muro_ca_ba;ursodeoxycholic_acid_udca_ba	0.016189727810710056
658	azoarcus	lithocholenic_acid_ba;x8_14_5b_cholenic_acid_3a_12a_diol_ba	0.016246789832434345
659	flavisolibacter	lithocholenic_acid_ba;x8_14_5b_cholenic_acid_3a_12a_diol_ba	0.0162541
660	lutibacter;solitalea	succinate_s	0.016309967063653244
661	xanthobacter	glycochenodeoxycholic_acid_gcdca_ba;glycocholic_acid_gca_ba	0.0163409
662	microterricola	chenodeoxycholic_acid_cdca_ba;cholic_acid_ca_ba	0.016357
663	kineococcus;salinibacterium;pimelobacter;sinomonas;bradymonas;salinispora	lithocholenic_acid_ba	0.016460068852714383
664	planctomyces	taurocholic_acid_tca_ba	0.016525142084967484
665	desulfatibacillum	x3a_hydroxy_7_12_diketo_cholanic_acid_ba	0.016531339249563896
666	rhodobaca	taurocholic_acid_tca_ba	0.016598050076679173
667	thermodesulfobium	propionate_s	0.016671328342108674
668	methanohalophilus	butyrate_s	0.0166737
669	waddlia	isolithocholic_acid_ba;lithocholic_acid_ba	0.016682991266644083
670	leifsonia;nitrospira	tauro_w_muricholic_acid_tw_mca_ba	0.016709173593235982
671	adlercreutzia;methanothrix	glycochenodeoxycholic_acid_gcdca_ba	0.016765401686157987
672	fastidiosipila	murocholic_acid_muro_ca_ba;ursodeoxycholic_acid_udca_ba	0.016768911435871458
673	roseibacterium	lithocholenic_acid_ba;x8_14_5b_cholenic_acid_3a_12a_diol_ba	0.0167752
674	porphyrobacter;allokutzneria;microcella	lithocholenic_acid_ba	0.016782285643324447
675	halorhodospira	allolithocholic_acid_ba	0.016834
676	halorientalis	taurocholic_acid_tca_ba	0.0168365
677	brevibacterium	lithocholenic_acid_ba	0.0168658
678	pseudanabaena	murocholic_acid_muro_ca_ba	0.016925428678562466
679	sodalis	acetate_s	0.016965
680	lentzea;thermobispora	glycochenodeoxycholic_acid_gcdca_ba	0.016982279952130565
681	methylibium;thiobacillus	taurocholic_acid_tca_ba	0.017137508725047917
682	verrucosispora	lithocholenic_acid_ba	0.017137508725047917
683	fibrella	glycochenodeoxycholic_acid_gcdca_ba	0.017137508725047917
684	bradymonas;salinispora	taurocholic_acid_tca_ba	0.017184991423347725
685	flavisolibacter	allolithocholic_acid_ba	0.017194872587364633
686	cryobacterium	lithocholenic_acid_ba;x8_14_5b_cholenic_acid_3a_12a_diol_ba	0.017210615290094284
687	nocardioides	tryptophan_p	0.017221156391477994
688	acidipropionibacterium	glycochenodeoxycholic_acid_gcdca_ba	0.017259761714875598
689	candidatus_promineofilum;desulfarculus	glycocholic_acid_gca_ba	0.017261097390598137
690	thermosynechococcus	butyrate_s	0.017286906851988127
691	pseudodesulfovibrio	x8_14_5b_cholenic_acid_3a_12a_diol_ba	0.017375326170068178
692	acidimicrobium	x3_6_diketocholanic_acid_ba	0.017419404393412802
693	thermovirga	x3a_hydroxy_7_12_diketo_cholanic_acid_ba	0.017420205697587454
694	elizabethkingia	deoxycholic_acid_dca_ba	0.017420205697587454
695	nitrospirillum	chenodeoxycholic_acid_cdca_ba	0.017420205697587454
696	echinicola	glycodeoxycholic_acid_gdca_ba	0.017458557695663787
697	ruegeria	x3a_hydroxy_12_ketolithocholic_acid_ba	0.017503945686773013
698	bacterioplanes	succinate_s	0.017503945686773013
699	halobacterium	x5b_cholanic_acid_3b_12a_diol_ba	0.017508991749534426
700	magnetospira;rathayibacter;vogesella	cholic_acid_ca_ba	0.017513371915115913
701	afipia	taurodeoxycholic_acid_tdca_ba	0.0175685
702	candidatus_hoaglandella	lithocholenic_acid_ba;x8_14_5b_cholenic_acid_3a_12a_diol_ba	0.017569570675213544
703	congregibacter	succinate_s	0.017576279577666398
704	phycisphaera	x5b_cholanic_acid_3b_12a_diol_ba	0.017718205015284264
705	castellaniella;sulfurifustis	deoxycholic_acid_dca_ba	0.017718205015284264
706	methylomonas	deoxycholic_acid_dca_ba;isolithocholic_acid_ba;lithocholic_acid_ba	0.017762711948359666
707	acidothermus	taurocholic_acid_tca_ba	0.017870647477173002
708	segniliparus	lithocholenic_acid_ba;x8_14_5b_cholenic_acid_3a_12a_diol_ba	0.017872500572417998
709	auraticoccus	isodeoxycholic_acid_ba	0.0179045
710	granulicella	x3_dehydrocholic_acid_ba	0.0179045
711	actinopolyspora;haloarcula	allolithocholic_acid_ba	0.017925
712	aquiflexum	butyrate_s	0.018075114713734106
713	brevefilum	tauro_w_muricholic_acid_tw_mca_ba	0.0181119
714	actinotignum	glycochenodeoxycholic_acid_gcdca_ba;glycocholic_acid_gca_ba	0.018114264865412025
715	desulfobacca	x3_dehydrocholic_acid_ba	0.018172235976623104
716	salinispira	aspartate_s	0.018248092143043203
717	mycolicibacter	allolithocholic_acid_ba	0.0182768
718	hydrogenophaga	x3_dehydrocholic_acid_ba;chenodeoxycholic_acid_cdca_ba;cholic_acid_ca_ba	0.018298375081691153
719	methanothrix	glycoursodeoxycholic_acid_gudca_ba	0.018330484411622668
720	thermogutta	deoxycholic_acid_dca_ba	0.018330484411622668
721	aquiflexum	lithocholenic_acid_ba	0.018356420338420065
722	pseudogulbenkiania	x3_hydroxyisovalerate_p	0.0183711
723	treponema	x3_dehydrocholic_acid_ba	0.0183711
724	thermaerobacter	x5b_cholanic_acid_3b_12a_diol_ba	0.018392019392422965
725	prosthecochloris	glycochenodeoxycholic_acid_gcdca_ba	0.018454109370081243
726	haematospirillum	allolithocholic_acid_ba	0.018460498466125342
727	saccharothrix	x5b_cholanic_acid_3b_12a_diol_ba	0.018460498466125342
728	herminiimonas	x5b_cholanic_acid_3a_6a_diol_7_one_ba	0.018461604277717175
729	neomicrococcus	lithocholenic_acid_ba	0.018469031101811754
730	micrococcus	succinate_s	0.018500817161122993
731	syntrophobacter	taurocholic_acid_tca_ba	0.018674217525104092
732	zobellella	glycochenodeoxycholic_acid_gcdca_ba	0.018674217525104092
733	alicyclobacillus	glycochenodeoxycholic_acid_gcdca_ba;glycocholic_acid_gca_ba	0.018704172907611404
734	desulfomicrobium;desulfovibrio	x8_14_5b_cholenic_acid_3a_12a_diol_ba	0.018716547903797114
735	epibacterium	allolithocholic_acid_ba	0.0187355
736	congregibacter	taurocholic_acid_tca_ba	0.018747716531330116
737	plantibacter	x5b_cholanic_acid_3a_6a_diol_7_one_ba	0.018751465729711505
738	synechocystis	x3_dehydrocholic_acid_ba	0.018795847507415676
739	ereboglobus;sagittula	glycoursodeoxycholic_acid_gudca_ba;glycochenodeoxycholic_acid_gcdca_ba;glycocholic_acid_gca_ba	0.018842986754527464
740	denitrovibrio	succinate_s	0.018976245686834276
741	desulfotalea;thermodesulfatator	succinate_s	0.0190192
742	pelodictyon	allolithocholic_acid_ba	0.019219374420363745
743	clavibacter	taurocholic_acid_tca_ba	0.019254659334179264
744	pseudodesulfovibrio	cholic_acid_ca_ba	0.019270774128314443
745	halorhabdus	succinate_s	0.0192753
746	thiohalobacter	taurocholic_acid_tca_ba	0.019313025639745195
747	morganella	x3_hydroxybutyrate_p	0.019361998579964092
748	microterricola	tauro_w_muricholic_acid_tw_mca_ba	0.019361998579964092
749	starkeya	ursodeoxycholic_acid_udca_ba	0.019363131842280876
750	enterobacter;raoultella	lithocholenic_acid_ba	0.019402566955579965
751	acidiphilium;gluconacetobacter	glycochenodeoxycholic_acid_gcdca_ba	0.019405885843024658
752	psychroflexus	glycochenodeoxycholic_acid_gcdca_ba;glycocholic_acid_gca_ba	0.019446424484930842
753	sulfuriferula	taurocholic_acid_tca_ba	0.019495780270168992
754	aminobacter	glycodeoxycholic_acid_gdca_ba	0.019495780270168992
755	hahella	taurocholic_acid_tca_ba	0.019504523039598664
756	prosthecochloris	tauro_w_muricholic_acid_tw_mca_ba	0.019536942573128036
757	epibacterium	x8_14_5b_cholenic_acid_3a_12a_diol_ba	0.019536942573128036
758	synechococcus	glycocholic_acid_gca_ba	0.019599472585438937
759	chondromyces;luteipulveratus	allolithocholic_acid_ba	0.019614734953042806
760	desulfarculus	murocholic_acid_muro_ca_ba	0.019644
761	dyella	chenodeoxycholic_acid_cdca_ba	0.0197262
762	brucella	isolithocholic_acid_ba;lithocholic_acid_ba	0.0197262
763	arthrobacter;mesorhizobium;streptomyces;chromobacterium;tessaracoccus	glycocholic_acid_gca_ba	0.0198104
764	planktomarina	allolithocholic_acid_ba	0.0198134
765	candidatus_profftella	taurodeoxycholic_acid_tdca_ba	0.0198407
766	mycolicibacter	x3_dehydrocholic_acid_ba	0.019855086372020662
767	pelagibacterium;wenzhouxiangella	murocholic_acid_muro_ca_ba	0.019865
768	fibrella	chenodeoxycholic_acid_cdca_ba;cholic_acid_ca_ba	0.019983126629551803
769	bradyrhizobium;micromonospora	glycocholic_acid_gca_ba	0.0200012
770	serinicoccus	x3a_hydroxy_12_ketolithocholic_acid_ba	0.020086821746492286
771	eubacterium	methylamine_s	0.020235844394503447
772	roseibacterium	succinate_s	0.0202553
773	candidatus_paracaedibacter	deoxycholic_acid_dca_ba	0.020289116891587942
774	geobacter	taurocholic_acid_tca_ba	0.020298245693658713
775	salmonella	butyrate_s	0.020494842263280643
776	sulfuricurvum	isolithocholic_acid_ba;lithocholic_acid_ba	0.020494842263280643
777	thermococcus	murocholic_acid_muro_ca_ba;ursodeoxycholic_acid_udca_ba	0.020494842263280643
778	marinobacter	ursodeoxycholic_acid_udca_ba	0.020494842263280643
779	acetomicrobium	x8_14_5b_cholenic_acid_3a_12a_diol_ba	0.020498552889440098
780	conexibacter;sphaerochaeta	allolithocholic_acid_ba	0.0205696
781	marivirga;salinivirga	allolithocholic_acid_ba	0.0206037
782	zhongshania	x8_14_5b_cholenic_acid_3a_12a_diol_ba	0.020636466232026994
783	heliobacterium	cholic_acid_ca_ba	0.020640791731400723
784	dichelobacter	glutamate_s	0.0206705
785	rubrobacter	x5b_cholanic_acid_3b_12a_diol_ba	0.0206885
786	pajaroellobacter	x3_dehydrocholic_acid_ba	0.0206885
787	cobetia	allolithocholic_acid_ba;x3_6_diketocholanic_acid_ba;lithocholenic_acid_ba;x8_14_5b_cholenic_acid_3a_12a_diol_ba	0.020760742808212936
788	kineococcus;salinibacterium	x5b_cholanic_acid_3b_12a_diol_ba	0.020783261724864357
789	desulfitobacterium	taurocholic_acid_tca_ba	0.0207925
790	adlercreutzia	x3_6_diketocholanic_acid_ba;lithocholenic_acid_ba;x8_14_5b_cholenic_acid_3a_12a_diol_ba	0.020802318123024466
791	cronobacter	taurodeoxycholic_acid_tdca_ba	0.020813184133234536
792	jeongeupia	allolithocholic_acid_ba	0.020889093893230806
793	haloferax;parasaccharibacter	x8_14_5b_cholenic_acid_3a_12a_diol_ba	0.0209102
794	methylacidiphilum	ursodeoxycholic_acid_udca_ba	0.020958280352780106
795	halohasta	ursodeoxycholic_acid_udca_ba	0.0209591
796	mariprofundus	x3_dehydrocholic_acid_ba	0.021019554368012228
797	sideroxydans	glycocholic_acid_gca_ba	0.021019554368012228
798	marivirga	x8_14_5b_cholenic_acid_3a_12a_diol_ba	0.021109800525347847
799	ruegeria	cholic_acid_ca_ba	0.021109800525347847
800	dehalogenimonas	cholic_acid_ca_ba	0.021109800525347847
801	defluviimonas	glycochenodeoxycholic_acid_gcdca_ba	0.021139503341315202
802	lentzea	tauro_w_muricholic_acid_tw_mca_ba;taurochenodeoxycholic_acid_tcdca_ba;taurocholic_acid_tca_ba	0.021211347464640342
803	candidatus_blochmannia	aspartate_s	0.021225030157823586
804	salinisphaera	x3a_hydroxy_12_ketolithocholic_acid_ba	0.021225030157823586
805	alistipes	glucose_s	0.021236032149959828
806	congregibacter	cholic_acid_ca_ba	0.021346761803513577
807	actinoplanes;nocardiopsis	x3_6_diketocholanic_acid_ba	0.021383466724930873
808	mariprofundus	cholic_acid_ca_ba	0.0214678
809	friedmanniella	x3_6_diketocholanic_acid_ba	0.021474058333444943
810	haloferax	glycodeoxycholic_acid_gdca_ba	0.021474058333444943
811	methylomonas	chenodeoxycholic_acid_cdca_ba;cholic_acid_ca_ba	0.0214809
812	halorhodospira;parvibaculum	succinate_s	0.021559577307929022
813	archangium;caldilinea	x5b_cholanic_acid_3b_12a_diol_ba	0.021634113652447107
814	akkermansia;renibacterium	allolithocholic_acid_ba	0.0216928
815	singulisphaera;libanicoccus;denitrobacterium;corynebacterium;olsenella	tauro_w_muricholic_acid_tw_mca_ba	0.0216998
816	neorhizobium	glycochenodeoxycholic_acid_gcdca_ba	0.021720330498646283
817	thermomonospora	x8_14_5b_cholenic_acid_3a_12a_diol_ba	0.021728099972113963
818	magnetococcus;phaeobacter	lithocholenic_acid_ba	0.021783455666770205
819	ruegeria	methylamine_s	0.021842837798768416
820	polymorphum	glycoursodeoxycholic_acid_gudca_ba	0.021852421474445022
821	desulfuromonas	tauro_w_muricholic_acid_tw_mca_ba	0.021952622101834376
822	haloterrigena	x5b_cholanic_acid_3b_12a_diol_ba	0.021991093170341747
823	natronococcus	glycocholic_acid_gca_ba	0.022002104956348998
824	microlunatus	taurochenodeoxycholic_acid_tcdca_ba	0.022091659888470595
825	sulfuriferula	lithocholenic_acid_ba;x8_14_5b_cholenic_acid_3a_12a_diol_ba	0.0221964
826	planctopirus	cholic_acid_ca_ba	0.022202336934602215
827	chelatococcus	taurochenodeoxycholic_acid_tcdca_ba	0.022208811615416827
828	citromicrobium	x5a_cholanic_acid_3a_ol_6_one_ba	0.022286591974860062
829	leptospirillum	methylamine_s	0.022359766201747136
830	thalassospira	x8_14_5b_cholenic_acid_3a_12a_diol_ba	0.022359766201747136
831	acidiphilium	tauro_w_muricholic_acid_tw_mca_ba	0.0223814
832	haloferax	taurodeoxycholic_acid_tdca_ba	0.0223961
833	candidatus_moranella	isolithocholic_acid_ba;lithocholic_acid_ba	0.0224214
834	thioflavicoccus	tauro_w_muricholic_acid_tw_mca_ba	0.022443044704482367
835	serinicoccus	chenodeoxycholic_acid_cdca_ba	0.022443044704482367
836	methanospirillum	glycochenodeoxycholic_acid_gcdca_ba	0.022451364051901974
837	basilea	glutamine_s	0.022451364051901974
838	halotalea	allolithocholic_acid_ba	0.022451364051901974
839	haloterrigena	allolithocholic_acid_ba	0.022459041936265228
840	obesumbacterium	deoxycholic_acid_dca_ba;isolithocholic_acid_ba;lithocholic_acid_ba	0.0224656
841	zunongwangia	glycodeoxycholic_acid_gdca_ba	0.022499620600571094
842	ensifer	isolithocholic_acid_ba;lithocholic_acid_ba	0.0225107
843	spiribacter	x5b_cholanic_acid_3b_12a_diol_ba	0.0225107
844	microvirgula	murocholic_acid_muro_ca_ba	0.0225107
845	hartmannibacter;nitrosospira	succinate_s	0.022521489814901433
846	paenibacillus	succinate_s	0.022575690955132826
847	thermovirga	glycochenodeoxycholic_acid_gcdca_ba	0.0225843
848	methanomassiliicoccus	glycoursodeoxycholic_acid_gudca_ba	0.022612209384750136
849	aquifex	murocholic_acid_muro_ca_ba;ursodeoxycholic_acid_udca_ba	0.022618684881568894
850	dinoroseobacter;nitratireductor	lithocholenic_acid_ba	0.022618684881568894
851	formosa	taurodeoxycholic_acid_tdca_ba	0.0226522
852	hyphomonas	x8_14_5b_cholenic_acid_3a_12a_diol_ba	0.0226522
853	rubrobacter	x3_6_diketocholanic_acid_ba	0.0226522
854	actinoalloteichus	x5b_cholanic_acid_3b_12a_diol_ba	0.0226522
855	methanothrix	tauro_w_muricholic_acid_tw_mca_ba	0.0226522
856	methylococcus	x3_dehydrocholic_acid_ba	0.0226522
857	flavisolibacter	deoxycholic_acid_dca_ba;isolithocholic_acid_ba;lithocholic_acid_ba	0.022805916416434188
858	halopenitus	chenodeoxycholic_acid_cdca_ba;cholic_acid_ca_ba	0.022853244255158018
859	anaplasma	allolithocholic_acid_ba	0.022853244255158018
860	candidatus_accumulibacter	aspartate_s	0.022853244255158018
861	pararhodospirillum	x3_dehydrocholic_acid_ba	0.022853244255158018
862	segniliparus	glycoursodeoxycholic_acid_gudca_ba	0.022853244255158018
863	syntrophobacter	isolithocholic_acid_ba;lithocholic_acid_ba	0.022853244255158018
864	planctopirus	formate_p	0.0228576
865	methylovulum	succinate_s	0.0228576
866	thiohalobacter	tauro_w_muricholic_acid_tw_mca_ba	0.022861787380883597
867	salinisphaera	x3_dehydrocholic_acid_ba	0.022869002022897735
868	haloterrigena	glycoursodeoxycholic_acid_gudca_ba;glycochenodeoxycholic_acid_gcdca_ba;glycocholic_acid_gca_ba	0.022874499265027288
869	jatrophihabitans	taurocholic_acid_tca_ba	0.022891633867636985
870	halocynthiibacter	x3_dehydrocholic_acid_ba	0.022916131443930492
871	wenzhouxiangella	allolithocholic_acid_ba	0.022936711208477206
872	janibacter	x5b_cholanic_acid_3b_12a_diol_ba	0.023007019547079708
873	myxococcus;sphingopyxis	allolithocholic_acid_ba	0.023007695510386367
874	blastomonas	lithocholenic_acid_ba	0.0230267
875	cellulosimicrobium	x3_hydroxyisovalerate_p	0.023100649301044215
876	salinispira	glycolithocholic_acid_glca_ba	0.023139949087697495
877	hydrogenobaculum	x3_dehydrocholic_acid_ba	0.023140546748869922
878	thiocystis	glycochenodeoxycholic_acid_gcdca_ba	0.023140546748869922
879	desulfovibrio	x3a_12a_23_nordeoxycholic_acid_ba	0.023191943635941206
880	micromonospora	x5b_cholanic_acid_3b_12a_diol_ba	0.023218021300800813
881	halopenitus	glycoursodeoxycholic_acid_gudca_ba	0.0232669
882	hartmannibacter	cholic_acid_ca_ba	0.023352158875481418
883	lacunisphaera	x5b_cholanic_acid_3b_12a_diol_ba	0.023380534894039556
884	methylorubrum;mycolicibacterium	alanine_s	0.0233971
885	desulfomicrobium;desulfovibrio	cholic_acid_ca_ba	0.0234267
886	negativicoccus	succinate_s	0.023447404842544674
887	auraticoccus	tyrosine_p	0.023447404842544674
888	methylacidiphilum	cholic_acid_ca_ba	0.023457799681671547
889	brucella	taurocholic_acid_tca_ba	0.023489223961693218
890	peptoniphilus	glycoursocholanic_acid_ba	0.0235555
891	planktomarina	x8_14_5b_cholenic_acid_3a_12a_diol_ba	0.023606179549232092
892	streptomyces;chromobacterium;tessaracoccus	lithocholenic_acid_ba	0.023606179549232092
893	chlorobium	glycodeoxycholic_acid_gdca_ba	0.0237327
894	candidatus_methanomethylophilus	glycochenodeoxycholic_acid_gcdca_ba	0.0238081
895	hartmannibacter	ursodeoxycholic_acid_udca_ba	0.0238244
896	isosphaera;pseudohongiella	lithocholenic_acid_ba	0.0239048
897	hyphomonas;salinisphaera	succinate_s	0.023940290181611756
898	kibdelosporangium	x5a_cholanic_acid_3a_ol_6_one_ba;x5b_cholanic_acid_3a_6a_diol_7_one_ba	0.023972570732817968
899	halomonas	taurocholic_acid_tca_ba	0.0239932
900	salinisphaera	cholic_acid_ca_ba	0.0240839
901	rhizorhabdus	x5a_cholanic_acid_3a_ol_6_one_ba	0.0240839
902	candidatus_paracaedibacter	x3a_12a_23_nordeoxycholic_acid_ba	0.024097741310085255
903	agrobacterium;neorhizobium	glycocholic_acid_gca_ba	0.024157498999131652
904	halotalea	cholic_acid_ca_ba	0.0241955
905	luteitalea	ursodeoxycholic_acid_udca_ba	0.024202126028030513
906	jiangella	glycocholic_acid_gca_ba	0.024224889196127166
907	komagataeibacter	glycocholic_acid_gca_ba	0.024359551914397815
908	methylacidiphilum	x3a_hydroxy_12_ketolithocholic_acid_ba	0.0244916
909	alkalitalea	chenodeoxycholic_acid_cdca_ba;cholic_acid_ca_ba	0.0245143
910	gillisia	tauro_w_muricholic_acid_tw_mca_ba	0.024523289559697833
911	eubacterium	x3_dehydrocholic_acid_ba	0.0245475
912	entomoplasma	x5b_cholanic_acid_3b_12a_diol_ba	0.024579
913	corynebacterium;olsenella	allolithocholic_acid_ba	0.024629
914	bdellovibrio	chenodeoxycholic_acid_cdca_ba;cholic_acid_ca_ba	0.024641336096288387
915	haloplanus	succinate_s	0.0246754
916	pseudohongiella	glycochenodeoxycholic_acid_gcdca_ba;glycocholic_acid_gca_ba	0.024738595000877245
917	lacunisphaera	x3_6_diketocholanic_acid_ba	0.024806259760183635
918	acetomicrobium	succinate_s	0.024815547014195073
919	blastochloris	lithocholenic_acid_ba	0.024815547014195073
920	methyloversatilis	tauro_w_muricholic_acid_tw_mca_ba	0.024825160658676706
921	citrobacter	x8_14_5b_cholenic_acid_3a_12a_diol_ba	0.024827065602819602
922	methylococcus	x3a_hydroxy_12_ketolithocholic_acid_ba	0.024873241201492473
923	methanofollis	ursodeoxycholic_acid_udca_ba	0.024879460374114544
924	dialister	cholic_acid_ca_ba	0.0249007
925	sideroxydans	glycochenodeoxycholic_acid_gcdca_ba	0.024988821330624036
926	geobacter	lithocholenic_acid_ba	0.024988821330624036
927	morganella	isolithocholic_acid_ba	0.025007223615104757
928	melittangium	taurochenodeoxycholic_acid_tcdca_ba	0.0250237
929	rhodovulum;roseibacterium	taurocholic_acid_tca_ba	0.025031105268240032
930	dehalogenimonas	glycocholic_acid_gca_ba	0.0251301
931	acidimicrobium	x8_14_5b_cholenic_acid_3a_12a_diol_ba	0.0252287
932	halopiger	taurochenodeoxycholic_acid_tcdca_ba;taurocholic_acid_tca_ba	0.025255297950767443
933	collimonas;nitrosomonas	x3_dehydrocholic_acid_ba	0.025269486842884426
934	dyadobacter	ursodeoxycholic_acid_udca_ba	0.0253392
935	brevibacterium	glycochenodeoxycholic_acid_gcdca_ba	0.0253615
936	phreatobacter	taurochenodeoxycholic_acid_tcdca_ba	0.025376639329572348
937	alkalitalea	alanine_s	0.025418
938	myxococcus	ursodeoxycholic_acid_udca_ba	0.025418
939	faecalibaculum	x3_dehydrocholic_acid_ba	0.025418
940	anderseniella	cholic_acid_ca_ba	0.025544117263926205
941	methanofollis	tauro_w_muricholic_acid_tw_mca_ba	0.025547225987342142
942	parasaccharibacter	deoxycholic_acid_dca_ba	0.025602520765542685
943	fimbriimonas	lithocholenic_acid_ba	0.025633541950439896
944	salinibacter	x3_6_diketocholanic_acid_ba	0.025674937054661978
945	pelagibacterium;wenzhouxiangella	glycochenodeoxycholic_acid_gcdca_ba	0.025753887219828325
946	verminephrobacter	lithocholenic_acid_ba	0.025753887219828325
947	tenacibaculum	propionate_s	0.025753887219828325
948	morganella	lithocholic_acid_ba	0.025780147632419665
949	aromatoleum	taurocholic_acid_tca_ba	0.025900741940711996
950	chlorobium	x8_14_5b_cholenic_acid_3a_12a_diol_ba	0.025900741940711996
951	thermus;limnochorda;meiothermus	glycochenodeoxycholic_acid_gcdca_ba;glycocholic_acid_gca_ba	0.0259069
952	cobetia	ursodeoxycholic_acid_udca_ba	0.0259069
953	fimbriimonas	tauro_w_muricholic_acid_tw_mca_ba	0.025919744725211757
954	shimwellia	chenodeoxycholic_acid_cdca_ba	0.025941974360108408
955	gluconacetobacter	x5b_cholanic_acid_3b_12a_diol_ba	0.0259773
956	hydromonas	succinate_s	0.026005757851535607
957	aminomonas	tauro_w_muricholic_acid_tw_mca_ba	0.026005757851535607
958	mobiluncus	glycoursodeoxycholic_acid_gudca_ba	0.026005757851535607
959	raoultella	x8_14_5b_cholenic_acid_3a_12a_diol_ba	0.0260515
960	dinoroseobacter;nitratireductor	allolithocholic_acid_ba	0.026106993406947755
961	methanomassiliicoccus	murocholic_acid_muro_ca_ba;ursodeoxycholic_acid_udca_ba	0.026143062194049414
962	candidatus_phaeomarinobacter	tauro_w_muricholic_acid_tw_mca_ba	0.026143062194049414
963	anaerolinea	x3a_hydroxy_12_ketolithocholic_acid_ba	0.026150547097195533
964	methanoculleus	methylamine_s	0.026296724493407406
965	haloterrigena	alanine_s	0.026359873228087412
966	gordonia	cholic_acid_ca_ba	0.0263788
967	amphibacillus	glycoursocholanic_acid_ba	0.0263788
968	thermovibrio	x3_dehydrocholic_acid_ba;chenodeoxycholic_acid_cdca_ba;cholic_acid_ca_ba	0.026390052731599927
969	acidothermus	x8_14_5b_cholenic_acid_3a_12a_diol_ba	0.0264042
970	halogeometricum	chenodeoxycholic_acid_cdca_ba	0.026464556013578222
971	elusimicrobium	taurocholic_acid_tca_ba	0.0264892
972	cohaesibacter;pyrococcus	allolithocholic_acid_ba	0.0264908
973	ezakiella	x3a_hydroxy_7_12_diketo_cholanic_acid_ba	0.026520277316730772
974	planctopirus	succinate_s	0.026555373673959128
975	janibacter	allolithocholic_acid_ba	0.026561281506703727
976	thiomicrospira	methylamine_s	0.0265687
977	desulfotalea	lithocholenic_acid_ba;x8_14_5b_cholenic_acid_3a_12a_diol_ba	0.0265687
978	oxalobacter	allolithocholic_acid_ba	0.0265687
979	paucibacter	taurodeoxycholic_acid_tdca_ba	0.026646146840216177
980	methanobacterium	glycoursocholanic_acid_ba	0.026676506082863254
981	thermacetogenium	lithocholenic_acid_ba	0.026693471627833615
982	tolumonas	phenylalanine_p;tyrosine_p	0.0267611
983	salinarchaeum	x3a_12a_23_nordeoxycholic_acid_ba	0.026798058524501057
984	hahella	allolithocholic_acid_ba	0.026845848967402396
985	sulfurimonas	x3_dehydrocholic_acid_ba	0.0268709
986	leifsonia;nitrospira	glycodeoxycholic_acid_gdca_ba	0.0268709
987	desulfarculus	glycochenodeoxycholic_acid_gcdca_ba	0.0268709
988	salinibacter	chenodeoxycholic_acid_cdca_ba	0.0269187
989	hymenobacter	chenodeoxycholic_acid_cdca_ba;cholic_acid_ca_ba	0.026987436980359672
990	candidatus_accumulibacter	allolithocholic_acid_ba	0.0270101
991	blattabacterium	lactate_p	0.0270666
992	heliobacterium	x3a_hydroxy_12_ketolithocholic_acid_ba	0.0270666
993	pimelobacter	murocholic_acid_muro_ca_ba	0.0270727
994	thiomicrospira	glycocholic_acid_gca_ba	0.0271018
995	oceanimonas	lysine_p	0.027121679263200697
996	thalassospira	allolithocholic_acid_ba	0.027122874058320295
997	prosthecochloris	taurocholic_acid_tca_ba	0.027232522410155266
998	nitratireductor	x3_dehydrocholic_acid_ba	0.0272357
999	phaeobacter	chenodeoxycholic_acid_cdca_ba	0.0272433
1000	mesotoga	succinate_s	0.02725
1001	hyphomonas;salinisphaera	taurocholic_acid_tca_ba	0.027258005176882705
1002	ramlibacter	lithocholenic_acid_ba;x8_14_5b_cholenic_acid_3a_12a_diol_ba	0.027258005176882705
1003	nitratireductor	taurocholic_acid_tca_ba	0.0273514
1004	spongiibacterium	deoxycholic_acid_dca_ba	0.027445038527907643
1005	eikenella	lithocholenic_acid_ba	0.027446852352652523
1006	methylomicrobium;acidithiobacillus;methylocella	isolithocholic_acid_ba;lithocholic_acid_ba	0.0274656
1007	mycolicibacterium	isolithocholic_acid_ba;lithocholic_acid_ba	0.0274656
1008	akkermansia	succinate_s	0.0274656
1009	stackebrandtia	glycocholic_acid_gca_ba	0.027518055612373825
1010	rhodopseudomonas	x3_6_diketocholanic_acid_ba	0.0275374
1011	methanothrix	butyrate_s	0.027608073364030435
1012	marinovum	allolithocholic_acid_ba	0.027661137746849303
1013	zobellia	succinate_s	0.0276791
1014	acetomicrobium	x3a_hydroxy_12_ketolithocholic_acid_ba	0.027752765022661913
1015	pluralibacter	deoxycholic_acid_dca_ba	0.027765227809116767
1016	sulfurimonas	cholic_acid_ca_ba	0.027877237136131515
1017	nitratireductor	cholic_acid_ca_ba	0.0279166
1018	erysipelothrix	tryptophan_p	0.027923550072896184
1019	xylella	alanine_p	0.027953526600271242
1020	marinobacterium	lithocholenic_acid_ba	0.027990416341787526
1021	defluviimonas	taurocholic_acid_tca_ba	0.027991308523890878
1022	corynebacterium	glycocholic_acid_gca_ba	0.028000354817043754
1023	kribbella	tauro_w_muricholic_acid_tw_mca_ba	0.028043443418844082
1024	devosia	glycochenodeoxycholic_acid_gcdca_ba	0.0280757
1025	neomicrococcus	glycochenodeoxycholic_acid_gcdca_ba;glycocholic_acid_gca_ba	0.0280757
1026	afipia	citrate_p	0.0281013
1027	thermobispora	x3_6_diketocholanic_acid_ba	0.028119
1028	idiomarina	x3_hydroxybutyrate_p	0.0281722
1029	leptothrix	deoxycholic_acid_dca_ba;isolithocholic_acid_ba;lithocholic_acid_ba	0.0281807
1030	synechococcus	glycochenodeoxycholic_acid_gcdca_ba	0.028184606531342932
1031	caldimicrobium	ursodeoxycholic_acid_udca_ba	0.028186198704822984
1032	hippea	x3a_12a_23_nordeoxycholic_acid_ba	0.028195539530587843
1033	pyrococcus	methylamine_s	0.028195539530587843
1034	methylobacterium	allolithocholic_acid_ba	0.028195539530587843
1035	verrucosispora	x8_14_5b_cholenic_acid_3a_12a_diol_ba	0.028195539530587843
1036	pseudarthrobacter	chenodeoxycholic_acid_cdca_ba	0.028195539530587843
1037	sulfurifustis	aspartate_s	0.0282156
1038	cobetia	chenodeoxycholic_acid_cdca_ba;cholic_acid_ca_ba	0.0282156
1039	roseomonas	glycochenodeoxycholic_acid_gcdca_ba;glycocholic_acid_gca_ba	0.028415572063510135
1040	allochromatium;sulfuriferula	x3_dehydrocholic_acid_ba	0.028536137430900502
1041	cryptobacterium	taurocholic_acid_tca_ba	0.028536137430900502
1042	natrinema	succinate_s	0.028536137430900502
1043	brevirhabdus	murocholic_acid_muro_ca_ba	0.028536137430900502
1044	aminobacterium	lithocholenic_acid_ba	0.028544482010995856
1045	woeseia	lactate_p	0.028552818897476268
1046	salinigranum	taurocholic_acid_tca_ba	0.0285561
1047	candidatus_phytoplasma;picrophilus	glycoursocholanic_acid_ba	0.028562253096501677
1048	fluoribacter	glycocholic_acid_gca_ba	0.028564935462479197
1049	oscillatoria	deoxycholic_acid_dca_ba	0.028615219987463244
1050	methylococcus	cholic_acid_ca_ba	0.028615219987463244
1051	anabaena	lactate_p	0.028635328324149462
1052	candidatus_solibacter	tyrosine_p	0.0286776
1053	pyrococcus	lactate_p	0.028689089615750153
1054	ahniella	x5b_cholanic_acid_3a_6a_diol_7_one_ba	0.0287545
1055	echinicola	deoxycholic_acid_dca_ba	0.0287874
1056	salinispora	murocholic_acid_muro_ca_ba	0.028837460399675025
1057	geitlerinema	x8_14_5b_cholenic_acid_3a_12a_diol_ba	0.028871000173659542
1058	candidatus_phytoplasma	x3_dehydrocholic_acid_ba	0.028907012929552774
1059	candidatus_hoaglandella	butyrate_s	0.028917154681390948
1060	dolichospermum	creatinine_p	0.028932029982909238
1061	candidatus_moranella	taurodeoxycholic_acid_tdca_ba	0.028987877215536643
1062	kiritimatiella	ursodeoxycholic_acid_udca_ba	0.029016762876241605
1063	butyrivibrio	butyrate_s	0.029026893024785526
1064	thermincola	x5b_cholanic_acid_3a_6a_diol_7_one_ba	0.029077165820535978
1065	heliobacterium	x3_dehydrocholic_acid_ba	0.0291482
1066	alkalitalea	x8_14_5b_cholenic_acid_3a_12a_diol_ba	0.029162047137365057
1067	phoenicibacter	glycine_p	0.029205491711816464
1068	methylobacterium	x8_14_5b_cholenic_acid_3a_12a_diol_ba	0.0292062
1069	xanthobacter	taurocholic_acid_tca_ba	0.029215082178664725
1070	halobacterium	tyrosine_p	0.029271124199910334
1071	sphingobium	lithocholenic_acid_ba;x8_14_5b_cholenic_acid_3a_12a_diol_ba	0.029304395246736656
1072	mucinivorans	lithocholenic_acid_ba	0.029338961356685764
1073	desulfobulbus;desulfohalobium	cholic_acid_ca_ba	0.029384
1074	marinobacterium	x3_6_diketocholanic_acid_ba	0.029387999962035755
1075	citromicrobium	alanine_s	0.0294241
1076	eubacterium	ursodeoxycholic_acid_udca_ba	0.0294281
1077	roseovarius	alanine_s	0.029467996853460805
1078	haloarcula	chenodeoxycholic_acid_cdca_ba;cholic_acid_ca_ba	0.029493805553177096
1079	aeromicrobium;novosphingobium	x5b_cholanic_acid_3b_12a_diol_ba	0.029493805553177096
1080	desulfobacca	glycocholic_acid_gca_ba	0.029494727707585155
1081	nitratireductor	succinate_s	0.029529817927115613
1082	leisingera	x3_dehydrocholic_acid_ba	0.029552569807878425
1083	ezakiella	cholic_acid_ca_ba	0.0296458
1084	halostagnicola	murocholic_acid_muro_ca_ba;ursodeoxycholic_acid_udca_ba	0.0296621
1085	frankia	x5b_cholanic_acid_3b_12a_diol_ba	0.029791544633405474
1086	candidatus_koribacter	cholic_acid_ca_ba	0.029822350344117652
1087	syntrophothermus	x3_dehydrocholic_acid_ba	0.0298319
1088	acetomicrobium	butyrate_s	0.0298319
1089	azotobacter	murocholic_acid_muro_ca_ba	0.0298319
1090	dokdonella	glycochenodeoxycholic_acid_gcdca_ba	0.0298319
1091	renibacterium	ursodeoxycholic_acid_udca_ba	0.029959057288010422
1092	desulfohalobium	glycolithocholic_acid_glca_ba	0.029983530407476092
1093	zunongwangia	deoxycholic_acid_dca_ba	0.030003
1094	paraburkholderia	x3_6_diketocholanic_acid_ba	0.0300093
1095	candidatus_promineofilum;desulfarculus	taurocholic_acid_tca_ba	0.0300362
1096	waddlia	glycochenodeoxycholic_acid_gcdca_ba	0.030039
1097	sphaerobacter	cholic_acid_ca_ba	0.030039178521141064
1098	waddlia	aspartate_s	0.030051
1099	sedimenticola	succinate_s	0.0300772
1100	zhihengliuella	glycoursodeoxycholic_acid_gudca_ba	0.030108015093996687
1101	salinigranum	tyrosine_p	0.0301292
1102	hartmannibacter	x3_dehydrocholic_acid_ba	0.030140428252019152
1103	caldisericum	murocholic_acid_muro_ca_ba	0.0303162
1104	natronococcus	cholic_acid_ca_ba	0.0303162
1105	nocardia	x3_6_diketocholanic_acid_ba	0.030325659698727744
1106	acidobacterium	glycocholic_acid_gca_ba	0.0305106
1107	nocardiopsis	glycoursodeoxycholic_acid_gudca_ba	0.0305845
1108	tepidanaerobacter	glycoursocholanic_acid_ba	0.0305845
1109	rhodopirellula	x3a_12a_23_nordeoxycholic_acid_ba	0.030586280041124226
1110	synechocystis	x3a_hydroxy_12_ketolithocholic_acid_ba	0.030596026721795375
1111	pseudodesulfovibrio	taurocholic_acid_tca_ba	0.030645146950431964
1112	aminobacterium	isolithocholic_acid_ba;lithocholic_acid_ba	0.030670369327868197
1113	roseobacter	succinate_s	0.0308027
1114	hirschia	tauro_w_muricholic_acid_tw_mca_ba	0.0309231
1115	flavisolibacter	chenodeoxycholic_acid_cdca_ba;cholic_acid_ca_ba	0.0309468
1116	filomicrobium	allolithocholic_acid_ba	0.030989320458912378
1117	desulfuromonas	x8_14_5b_cholenic_acid_3a_12a_diol_ba	0.030989320458912378
1118	gordonibacter	glycochenodeoxycholic_acid_gcdca_ba;glycocholic_acid_gca_ba	0.030989320458912378
1119	halomicronema	x3_dehydrocholic_acid_ba	0.031111929726892282
1120	caldanaerobacter;jeotgalicoccus	glycoursocholanic_acid_ba	0.031146480051185543
1121	dactylococcopsis	alanine_p	0.0312078
1122	curvibacter	propionate_s	0.031236615342926932
1123	zhihengliuella	cholic_acid_ca_ba	0.0313292
1124	clavibacter	glycodeoxycholic_acid_gdca_ba	0.0313292
1125	pannonibacter;phoenicibacter	x3a_hydroxy_12_ketolithocholic_acid_ba	0.0313526
1126	sulfuricaulis	lithocholenic_acid_ba;x8_14_5b_cholenic_acid_3a_12a_diol_ba	0.0313526
1127	asaia	cholic_acid_ca_ba	0.0314439
1128	cellulomonas	glycochenodeoxycholic_acid_gcdca_ba	0.031464607382789715
1129	bifidobacterium	x3_dehydrocholic_acid_ba	0.0315476
1130	scardovia	tyrosine_p	0.031556263135125745
1131	renibacterium	taurocholic_acid_tca_ba	0.0315596
1132	parvularcula	deoxycholic_acid_dca_ba	0.0316013
1133	curtobacterium	glycoursodeoxycholic_acid_gudca_ba	0.0316462
1134	proteiniphilum	glycochenodeoxycholic_acid_gcdca_ba	0.0316552
1135	mycobacterium	tauro_w_muricholic_acid_tw_mca_ba	0.0317155
1136	cobetia	x5b_cholanic_acid_3b_12a_diol_ba	0.0317976
1137	methanolinea	taurochenodeoxycholic_acid_tcdca_ba	0.031872
1138	acidihalobacter	ursodeoxycholic_acid_udca_ba	0.031958742385135026
1139	desulfosporosinus;virgibacillus	succinate_s	0.0319865
1140	synechocystis	glycochenodeoxycholic_acid_gcdca_ba	0.031996125574012234
1141	candidatus_hamiltonella	allolithocholic_acid_ba	0.032063603901527564
1142	oceanithermus	glycochenodeoxycholic_acid_gcdca_ba	0.032139257837185374
1143	kosakonia	lithocholic_acid_ba	0.032178302914754105
1144	mycolicibacter	cholic_acid_ca_ba	0.0322067
1145	fibrobacter	murocholic_acid_muro_ca_ba	0.0322283
1146	paraglaciecola	glycolithocholic_acid_glca_ba	0.032287696151791744
1147	saccharothrix	murocholic_acid_muro_ca_ba;ursodeoxycholic_acid_udca_ba	0.032287696151791744
1148	halorientalis	glycolithocholic_acid_glca_ba	0.032367896082552305
1149	nocardioides	tyrosine_p	0.032367896082552305
1150	zunongwangia	taurodeoxycholic_acid_tdca_ba	0.032367896082552305
1151	wolinella	butyrate_s	0.0323786
1152	jonquetella	x3_dehydrocholic_acid_ba	0.0323832
1153	simplicispira	glycochenodeoxycholic_acid_gcdca_ba	0.032385351927605215
1154	sphaerobacter	x3a_hydroxy_12_ketolithocholic_acid_ba	0.0323905
1155	jonquetella	ursodeoxycholic_acid_udca_ba	0.0324979
1156	acidothermus	tauro_w_muricholic_acid_tw_mca_ba	0.0324981
1157	chlorobaculum	isolithocholic_acid_ba;lithocholic_acid_ba	0.0324981
1158	actinotignum	x8_14_5b_cholenic_acid_3a_12a_diol_ba	0.032518207157824136
1159	methylovulum	x5b_cholanic_acid_3a_6a_diol_7_one_ba	0.032539658704671265
1160	paraburkholderia	isolithocholic_acid_ba;lithocholic_acid_ba	0.032559278047121096
1161	anaplasma	x8_14_5b_cholenic_acid_3a_12a_diol_ba	0.032594
1162	rhodospirillum	glycochenodeoxycholic_acid_gcdca_ba	0.0327081
1163	acetobacterium	x3_dehydrocholic_acid_ba	0.0327262
1164	nitratifractor	x3a_12a_23_nordeoxycholic_acid_ba	0.032754024889887705
1165	thermobaculum	glycine_p	0.032847689148265816
1166	actinotignum	taurocholic_acid_tca_ba	0.0328681
1167	luteitalea;myxococcus;sphingopyxis	glycocholic_acid_gca_ba	0.0329737
1168	kosakonia	isolithocholic_acid_ba	0.0329951
1169	morganella	lithocholenic_acid_ba;x8_14_5b_cholenic_acid_3a_12a_diol_ba	0.032998082206655927
1170	niabella	lithocholenic_acid_ba	0.032998082206655927
1171	nitrospirillum	glycodeoxycholic_acid_gdca_ba	0.032998082206655927
1172	blastochloris	succinate_s	0.0330358
1173	roseovarius	phenylalanine_s	0.0331138
1174	kineococcus	taurocholic_acid_tca_ba	0.033128391083209106
1175	corynebacterium	taurocholic_acid_tca_ba	0.033144362847484676
1176	melittangium	x3_6_diketocholanic_acid_ba	0.033150563776479736
1177	exiguobacterium	isopropanol_p	0.0331521
1178	rhodopirellula	tauro_w_muricholic_acid_tw_mca_ba	0.033178789007741835
1179	halomicronema	x3a_12a_23_nordeoxycholic_acid_ba	0.033213273144302745
1180	aquaspirillum;delftia	methylamine_s	0.033213273144302745
1181	orrella	glycolithocholic_acid_glca_ba	0.033213273144302745
1182	psychrobacter	propionate_s	0.033213273144302745
1183	pimelobacter	tyrosine_p	0.033349312510827026
1184	roseburia	x3_dehydrocholic_acid_ba	0.033356491573338504
1185	asticcacaulis	lithocholenic_acid_ba	0.0334059
1186	alkalitalea	deoxycholic_acid_dca_ba;isolithocholic_acid_ba;lithocholic_acid_ba	0.0334593
1187	coriobacterium	x3_dehydrocholic_acid_ba	0.0334593
1188	prevotella	taurochenodeoxycholic_acid_tcdca_ba	0.0334593
1189	monoglobus	glycoursodeoxycholic_acid_gudca_ba	0.033483488844194005
1190	anderseniella	succinate_s	0.0334872
1191	jatrophihabitans	isolithocholic_acid_ba;lithocholic_acid_ba	0.0334872
1192	pannonibacter	tauro_w_muricholic_acid_tw_mca_ba	0.033588
1193	natrinema	lithocholenic_acid_ba	0.033588
1194	azospira	taurocholic_acid_tca_ba	0.033588
1195	desulfobulbus;desulfohalobium	hyodeoxycholic_acid_ba	0.0336617
1196	paraoerskovia	ursodeoxycholic_acid_udca_ba	0.033671
1197	ferrimonas	allolithocholic_acid_ba	0.0337564
1198	laribacter	x3_dehydrocholic_acid_ba	0.0337564
1199	parascardovia	x3a_hydroxy_7_12_diketo_cholanic_acid_ba	0.0337855
1200	psychromonas	x3_dehydrocholic_acid_ba	0.0338364
1201	auraticoccus	taurochenodeoxycholic_acid_tcdca_ba	0.0338376
1202	micrococcus	cholic_acid_ca_ba	0.033840215628130554
1203	congregibacter	x3_dehydrocholic_acid_ba	0.033840215628130554
1204	sulfitobacter	isolithocholic_acid_ba;lithocholic_acid_ba	0.0338737
1205	roseburia	cholic_acid_ca_ba	0.0339002
1206	candidatus_fokinia	trimethylamine_s	0.033902850840178904
1207	nitrospirillum	x3_dehydrocholic_acid_ba	0.0339086
1208	carboxydocella	x3_dehydrocholic_acid_ba	0.0341098
1209	methylococcus	x5b_cholanic_acid_3a_6a_diol_7_one_ba	0.0341398
1210	synechocystis	cholic_acid_ca_ba	0.0341476
1211	acidihalobacter	cholic_acid_ca_ba	0.034154000051955506
1212	ezakiella	x3_dehydrocholic_acid_ba	0.0342056
1213	leifsonia	trimethylamine_s	0.0343302
1214	haloarcula	x3a_hydroxy_12_ketolithocholic_acid_ba	0.0343352
1215	nitrososphaera	tyrosine_p	0.034352694766055215
1216	cohaesibacter	taurocholic_acid_tca_ba	0.034352694766055215
1217	aneurinibacillus	succinate_s	0.0343746
1218	carboxydothermus	butyrate_s	0.034396637657295406
1219	cedecea	alanine_p	0.0343998
1220	halobacteriovorax	isoleucine_p	0.034433160488324135
1221	cyanothece	lysine_p	0.034433160488324135
1222	rhizorhabdus	murocholic_acid_muro_ca_ba	0.034506381481364465
1223	chromohalobacter;kiritimatiella	taurocholic_acid_tca_ba	0.0345138
1224	amycolatopsis	glycocholic_acid_gca_ba	0.034569730996589915
1225	desulfomonile	x3_dehydrocholic_acid_ba	0.0346135
1226	halohasta	cholic_acid_ca_ba	0.034640946475316466
1227	phenylobacterium	tyrosine_p	0.034664256905854694
1228	azoarcus	glycolithocholic_acid_glca_ba	0.034695303250407615
1229	dehalobacterium	allolithocholic_acid_ba	0.034695303250407615
1230	niastella	succinate_s	0.034767373900931216
1231	janibacter	lithocholenic_acid_ba;x8_14_5b_cholenic_acid_3a_12a_diol_ba	0.0347718
1232	shigella	butyrate_s	0.0347851
1233	clostridioides	ursodeoxycholic_acid_udca_ba	0.034836423176850026
1234	thermococcus	x3_dehydrocholic_acid_ba	0.0351154
1235	winogradskyella	x3_hydroxybutyrate_p	0.035116
1236	hydrogenobaculum	x3a_hydroxy_7_12_diketo_cholanic_acid_ba	0.0351807
1237	porphyromonas	propionate_s	0.0352249
1238	geobacillus	x3_6_diketocholanic_acid_ba	0.0352562
1239	cuniculiplasma	x3a_hydroxy_7_12_diketo_cholanic_acid_ba	0.0352711
1240	candidatus_mikella	methylamine_s	0.0353202
1241	bosea	allolithocholic_acid_ba	0.0353362
1242	ethanoligenens	x3_6_diketocholanic_acid_ba	0.035347173713713924
1243	ramlibacter	x5b_cholanic_acid_3b_12a_diol_ba	0.035458642521284535
1244	melaminivora	glycochenodeoxycholic_acid_gcdca_ba	0.0356439
1245	pannonibacter;phoenicibacter	succinate_s	0.0356439
1246	desulfohalobium	aspartate_s	0.0356439
1247	anaerotignum	taurodeoxycholic_acid_tdca_ba	0.0356439
1248	desulfovibrio	taurochenodeoxycholic_acid_tcdca_ba	0.0357081
1249	psychromonas	x3a_hydroxy_7_12_diketo_cholanic_acid_ba	0.0358058
1250	aquabacterium	cholic_acid_ca_ba	0.0358507
1251	thermobifida	lithocholenic_acid_ba	0.0358507
1252	pannonibacter	cholic_acid_ca_ba	0.0358872
1253	stackebrandtia	x8_14_5b_cholenic_acid_3a_12a_diol_ba	0.035896032635566934
1254	verminephrobacter	glycochenodeoxycholic_acid_gcdca_ba	0.035911475463099155
1255	microbacterium	taurocholic_acid_tca_ba	0.036109075999064426
1256	candidatus_tachikawaea	alanine_s	0.0361334
1257	desulfuromonas	taurocholic_acid_tca_ba	0.0361599
1258	zunongwangia	citrate_p	0.0361599
1259	archaeoglobus	glycochenodeoxycholic_acid_gcdca_ba	0.036164667511149114
1260	caldithrix;gillisia	x3_dehydrocholic_acid_ba	0.036164667511149114
1261	zobellella	tauro_w_muricholic_acid_tw_mca_ba	0.036164667511149114
1262	raoultella	aspartate_s	0.036184765498580844
1263	serinicoccus	x3a_hydroxy_7_12_diketo_cholanic_acid_ba	0.036184765498580844
1264	rhodomicrobium	x3_dehydrocholic_acid_ba	0.0361864
1265	parvimonas	leucine_p	0.036202436928087736
1266	auraticoccus	taurocholic_acid_tca_ba	0.0362339
1267	methylomicrobium	alanine_s	0.0362339
1268	corynebacterium	glycochenodeoxycholic_acid_gcdca_ba	0.036258086633929446
1269	zunongwangia	x3_hydroxybutyrate_p	0.0363132
1270	candidatus_phycorickettsia	cholic_acid_ca_ba	0.0363282
1271	jonquetella	cholic_acid_ca_ba	0.036342752767028315
1272	dinoroseobacter	murocholic_acid_muro_ca_ba	0.0363465
1273	pseudarcicella	cholic_acid_ca_ba	0.0363465
1274	azorhizobium	tauro_w_muricholic_acid_tw_mca_ba	0.0364154
1275	stackebrandtia	glycochenodeoxycholic_acid_gcdca_ba	0.0364532
1276	leptospira	x3a_hydroxy_12_ketolithocholic_acid_ba	0.0364777
1277	castellaniella;sulfurifustis	glycodeoxycholic_acid_gdca_ba	0.0365098
1278	marinobacterium	chenodeoxycholic_acid_cdca_ba;cholic_acid_ca_ba	0.0365221
1279	roseomonas	taurocholic_acid_tca_ba	0.036554037073706636
1280	candidatus_hoaglandella	deoxycholic_acid_dca_ba;isolithocholic_acid_ba;lithocholic_acid_ba	0.036563885214763114
1281	melaminivora	taurocholic_acid_tca_ba	0.036563885214763114
1282	desulfobacterium	glycocholic_acid_gca_ba	0.036563885214763114
1283	janthinobacterium	succinate_s	0.0365976
1284	haematospirillum	lactate_p	0.0365976
1285	snodgrassella	x3_dehydrocholic_acid_ba	0.036625064401659475
1286	kyrpidia	glycine_p	0.0366376
1287	dyella	allolithocholic_acid_ba	0.0366834
1288	pelagibacterium	x8_14_5b_cholenic_acid_3a_12a_diol_ba	0.036783
1289	aromatoleum	x5a_cholanic_acid_3a_ol_6_one_ba	0.0368558
1290	methylovulum	taurocholic_acid_tca_ba	0.03686
1291	turneriella	x3_dehydrocholic_acid_ba	0.0368745
1292	acetomicrobium	ursodeoxycholic_acid_udca_ba	0.036955098112182984
1293	methylorubrum	glycoursodeoxycholic_acid_gudca_ba	0.036955098112182984
1294	riemerella	glycochenodeoxycholic_acid_gcdca_ba	0.036989
1295	rhizobacter	allolithocholic_acid_ba	0.0369961
1296	methanocella;murdochiella	allolithocholic_acid_ba	0.0370347
1297	tatlockia	valine_p	0.0370495
1298	allochromatium;sulfuriferula	cholic_acid_ca_ba	0.0370495
1299	rubinisphaera	citrate_p	0.037174409737849065
1300	cellvibrio	glycocholic_acid_gca_ba	0.037246
1301	anaerolinea;desulfobacterium	glycochenodeoxycholic_acid_gcdca_ba	0.0372846
1302	candidatus_koribacter	glycochenodeoxycholic_acid_gcdca_ba;glycocholic_acid_gca_ba	0.0372846
1303	opitutus	x3_6_diketocholanic_acid_ba	0.0372846
1304	arsenicicoccus	propionate_s	0.037307320438383605
1305	thermotoga	ursodeoxycholic_acid_udca_ba	0.037307320438383605
1306	pajaroellobacter	x3a_hydroxy_12_ketolithocholic_acid_ba	0.0373236
1307	tateyamaria	ursodeoxycholic_acid_udca_ba	0.0373236
1308	nitrobacter	taurocholic_acid_tca_ba	0.0373236
1309	amycolatopsis	alanine_s	0.0373236
1310	lacunisphaera	glycoursodeoxycholic_acid_gudca_ba	0.0373236
1311	simplicispira	tauro_w_muricholic_acid_tw_mca_ba	0.0374412
1312	sideroxydans	x5a_cholanic_acid_3a_ol_6_one_ba	0.0374703
1313	rhizorhabdus	glycolithocholic_acid_glca_ba	0.0374905
1314	pimelobacter	glycoursodeoxycholic_acid_gudca_ba	0.0375295
1315	nonomuraea	x5b_cholanic_acid_3b_12a_diol_ba	0.0375468
1316	methanosalsum	butyrate_s	0.0375546
1317	haloarcula	glycochenodeoxycholic_acid_gcdca_ba	0.0375879
1318	candidatus_atelocyanobacterium	glutamate_s	0.0376194
1319	roseibacterium	x5b_cholanic_acid_3b_12a_diol_ba	0.0376194
1320	thermovirga	murocholic_acid_muro_ca_ba	0.0377152
1321	nitrosococcus	x3_dehydrocholic_acid_ba	0.0378017
1322	auraticoccus	tryptophan_p	0.037827476271857764
1323	murdochiella	glycoursodeoxycholic_acid_gudca_ba	0.037827476271857764
1324	chloroherpeton	ursodeoxycholic_acid_udca_ba	0.0378364
1325	aeromonas	glycocholic_acid_gca_ba	0.0378454
1326	granulibacter	alanine_s	0.0379055
1327	acidithiobacillus	glycodeoxycholic_acid_gdca_ba	0.0379284
1328	cyanobium;symbiobacterium	x3_6_diketocholanic_acid_ba	0.0379501
1329	acidiphilium	taurochenodeoxycholic_acid_tcdca_ba	0.0380181
1330	catenovulum	x5b_cholanic_acid_3b_12a_diol_ba	0.0380293
1331	azoarcus	taurodeoxycholic_acid_tdca_ba	0.0380404
1332	tsukamurella	lithocholenic_acid_ba	0.0380404
1333	mitsuaria	glycodeoxycholic_acid_gdca_ba	0.0381526
1334	wenzhouxiangella	taurocholic_acid_tca_ba	0.0382283
1335	nitratifractor	x8_14_5b_cholenic_acid_3a_12a_diol_ba	0.038286
1336	methanothrix	glycocholic_acid_gca_ba	0.0383473
1337	sulfuricurvum	glycoursocholanic_acid_ba	0.038451081419630675
1338	citrobacter	isolithocholic_acid_ba;lithocholic_acid_ba	0.0384933
1339	sulfurimonas	succinate_s	0.0385222
1340	parvibaculum	glycoursodeoxycholic_acid_gudca_ba	0.0385501
1341	acidihalobacter	x3_dehydrocholic_acid_ba	0.038599788119898476
1342	anaerolinea	x3_dehydrocholic_acid_ba	0.038645886502326025
1343	ethanoligenens	glycoursodeoxycholic_acid_gudca_ba	0.038645886502326025
1344	halohasta	x5b_cholanic_acid_3b_12a_diol_ba	0.038655965475831056
1345	yersinia	lithocholenic_acid_ba	0.0386896
1346	defluviimonas	taurochenodeoxycholic_acid_tcdca_ba	0.0386896
1347	sedimenticola	ursodeoxycholic_acid_udca_ba	0.0387152
1348	jeongeupia	murocholic_acid_muro_ca_ba	0.0387152
1349	natrinema	taurochenodeoxycholic_acid_tcdca_ba	0.0387152
1350	aquaspirillum	glycocholic_acid_gca_ba	0.0387263
1351	rhodovulum	x5b_cholanic_acid_3a_6a_diol_7_one_ba	0.038900175376418406
1352	thermogutta	methylamine_s	0.0389408
1353	azospirillum	lithocholenic_acid_ba	0.038940984029128746
1354	halomicronema	x3a_hydroxy_12_ketolithocholic_acid_ba	0.0389963
1355	luteimonas	ursodeoxycholic_acid_udca_ba	0.0389963
1356	orientia	x3a_hydroxy_12_ketolithocholic_acid_ba	0.0391006
1357	mycobacterium	taurocholic_acid_tca_ba	0.0391006
1358	methylibium	glycocholic_acid_gca_ba	0.0391028
1359	streptomyces	glycochenodeoxycholic_acid_gcdca_ba	0.0391116
1360	methylacidiphilum	x3_dehydrocholic_acid_ba	0.0391245
1361	haematospirillum	lithocholenic_acid_ba	0.039261216757555464
1362	alicyclobacillus;chlorobaculum	taurochenodeoxycholic_acid_tcdca_ba	0.039261216757555464
1363	sulfurifustis	tauro_w_muricholic_acid_tw_mca_ba	0.039261216757555464
1364	mitsuaria	isolithocholic_acid_ba;lithocholic_acid_ba	0.0394071
1365	chania	x5b_cholenic_acid_7a_ol_3_one_ba	0.0394071
1366	klebsiella;salmonella	chenodeoxycholic_acid_cdca_ba	0.0394182
1367	variibacter	glycoursodeoxycholic_acid_gudca_ba	0.0394493
1368	arcanobacterium	succinate_s	0.039485824656491954
1369	gynuella;sphingorhabdus	x8_14_5b_cholenic_acid_3a_12a_diol_ba	0.0395036
1370	thermobifida	tauro_w_muricholic_acid_tw_mca_ba	0.039582
1371	planctomyces	taurochenodeoxycholic_acid_tcdca_ba	0.039665054497229756
1372	delftia	ursodeoxycholic_acid_udca_ba	0.039665054497229756
1373	thermincola	x3a_hydroxy_12_ketolithocholic_acid_ba	0.0396756
1374	thermanaeromonas	x3_dehydrocholic_acid_ba	0.0397137
1375	arachidicoccus	x8_14_5b_cholenic_acid_3a_12a_diol_ba	0.0398773
1376	methanofollis	x3_6_diketocholanic_acid_ba	0.039880779886706574
1377	faecalibaculum	x3a_hydroxy_12_ketolithocholic_acid_ba	0.039880779886706574
1378	sulfuricaulis	taurocholic_acid_tca_ba	0.039892497000837274
1379	blastochloris	taurocholic_acid_tca_ba	0.039973373713165186
1380	sulfitobacter	taurocholic_acid_tca_ba	0.039977161913753646
1381	pelodictyon	x3_dehydrocholic_acid_ba	0.0400065
1382	blastococcus	glycocholic_acid_gca_ba	0.0400065
1383	methyloversatilis	cholic_acid_ca_ba	0.040031539304305364
1384	micropruina	glycoursodeoxycholic_acid_gudca_ba	0.0400403
1385	phycisphaera	lithocholenic_acid_ba	0.0400462
1386	niveispirillum	glycocholic_acid_gca_ba	0.0400462
1387	azorhizobium	taurochenodeoxycholic_acid_tcdca_ba	0.0400462
1388	sinomonas	tryptophan_p	0.0401754
1389	natronococcus	murocholic_acid_muro_ca_ba	0.0403369
1390	hydrogenobaculum	x3a_hydroxy_12_ketolithocholic_acid_ba	0.0404319
1391	aquabacterium	x3_dehydrocholic_acid_ba	0.0405393
1392	microterricola	x3_6_diketocholanic_acid_ba	0.040613497219468456
1393	gallionella	aspartate_s	0.0406641
1394	kosakonia	deoxycholic_acid_dca_ba	0.0407042
1395	anderseniella	glycochenodeoxycholic_acid_gcdca_ba	0.0407731
1396	gloeomargarita	x8_14_5b_cholenic_acid_3a_12a_diol_ba	0.0407984
1397	anabaena	isolithocholic_acid_ba;lithocholic_acid_ba	0.0408469
1398	luteipulveratus	tauro_w_muricholic_acid_tw_mca_ba	0.0408714
1399	terriglobus	glycochenodeoxycholic_acid_gcdca_ba	0.0409692
1400	anabaena	x3_hydroxyisovalerate_p	0.040969710952014605
1401	candidatus_profftella	deoxycholic_acid_dca_ba	0.0409847
1402	limnochorda	tauro_w_muricholic_acid_tw_mca_ba	0.041017473272290696
1403	octadecabacter	allolithocholic_acid_ba	0.0410412
1404	paraoerskovia	x8_14_5b_cholenic_acid_3a_12a_diol_ba	0.0410412
1405	candidatus_desulforudis	lithocholenic_acid_ba;x8_14_5b_cholenic_acid_3a_12a_diol_ba	0.041079705919593534
1406	hyphomonas	glycine_p	0.041269086241310586
1407	desulfitobacterium	glycocholic_acid_gca_ba	0.041369
1408	methylosinus	taurochenodeoxycholic_acid_tcdca_ba	0.0414333
1409	salimicrobium	x3_dehydrocholic_acid_ba	0.041491308493695186
1410	methylobacterium	tauro_w_muricholic_acid_tw_mca_ba	0.041491308493695186
1411	paludisphaera	x5a_cholanic_acid_3a_ol_6_one_ba	0.041491308493695186
1412	pluralibacter	glycodeoxycholic_acid_gdca_ba	0.0415602
1413	microvirgula	allolithocholic_acid_ba	0.0415612
1414	thiohalobacter	murocholic_acid_muro_ca_ba	0.0417089
1415	niveispirillum	isolithocholic_acid_ba;lithocholic_acid_ba	0.041722
1416	pedobacter	methylamine_s	0.041746957335203505
1417	natronomonas	acetate_p	0.0417579
1418	magnetococcus	x3_6_diketocholanic_acid_ba	0.041760663570733804
1419	candidatus_hoaglandella	allolithocholic_acid_ba	0.041761634490628884
1420	actinotignum	tauro_w_muricholic_acid_tw_mca_ba	0.041768701053346347
1421	ferrimonas	x3_dehydrocholic_acid_ba	0.041778529780945366
1422	niastella	glycocholic_acid_gca_ba	0.041825887146172885
1423	citromicrobium	succinate_s	0.0419383
1424	mogibacterium	glycoursocholanic_acid_ba	0.041950276697721285
1425	pajaroellobacter	cholic_acid_ca_ba	0.0420132
1426	beijerinckia	ursodeoxycholic_acid_udca_ba	0.0420132
1427	salinigranum	x5b_cholanic_acid_3b_12a_diol_ba	0.0420132
1428	sulfuricaulis	x3a_12a_23_nordeoxycholic_acid_ba	0.0420132
1429	desulfovibrio	hyodeoxycholic_acid_ba	0.0420132
1430	haliscomenobacter	deoxycholic_acid_dca_ba	0.0420132
1431	blastochloris	tauro_w_muricholic_acid_tw_mca_ba	0.0420184
1432	methylomonas	allolithocholic_acid_ba	0.042122279847874665
1433	cystobacter	tryptophan_p	0.042124112364476274
1434	granulicella	glycodeoxycholic_acid_gdca_ba	0.0421425
1435	heliobacterium	glycocholic_acid_gca_ba	0.042169457614317694
1436	salinispira	lithocholenic_acid_ba;x8_14_5b_cholenic_acid_3a_12a_diol_ba	0.0422028
1437	halopiger	allolithocholic_acid_ba	0.0422028
1438	fibrobacter	glycocholic_acid_gca_ba	0.0422553
1439	leifsonia	alanine_s	0.0422553
1440	thiodictyon	taurochenodeoxycholic_acid_tcdca_ba	0.0422553
1441	coriobacterium	ursodeoxycholic_acid_udca_ba	0.0422553
1442	spirochaeta	succinate_s	0.0422553
1443	klebsiella	x3a_hydroxy_12_ketolithocholic_acid_ba	0.042265834904230914
1444	phaeobacter	x3_dehydrocholic_acid_ba	0.042265834904230914
1445	serinicoccus	propionate_s	0.0422723
1446	sorangium	taurocholic_acid_tca_ba	0.0422737
1447	syntrophobotulus	isopropanol_p	0.0423371
1448	frateuria	methylamine_s	0.042381
1449	raoultella	taurodeoxycholic_acid_tdca_ba	0.0424035
1450	leisingera	chenodeoxycholic_acid_cdca_ba	0.0424698
1451	gordonia	methylamine_s	0.0424731
1452	salinibacter	deoxycholic_acid_dca_ba;isolithocholic_acid_ba;lithocholic_acid_ba	0.0424731
1453	asaia	x3a_hydroxy_12_ketolithocholic_acid_ba	0.0424891
1454	variibacter	murocholic_acid_muro_ca_ba	0.042511432083400295
1455	luteibacter	taurochenodeoxycholic_acid_tcdca_ba	0.042542611609191566
1456	mycobacterium	allolithocholic_acid_ba	0.0426109
1457	ottowia	allolithocholic_acid_ba	0.042651
1458	olleya	tryptophan_p	0.0426777
1459	thermomonospora	glycodeoxycholic_acid_gdca_ba	0.0426777
1460	blastococcus	glycochenodeoxycholic_acid_gcdca_ba	0.0426777
1461	pseudodesulfovibrio	x3_dehydrocholic_acid_ba	0.0426777
1462	intestinimonas	butyrate_s	0.0426807
1463	gardnerella	pyruvate_p	0.042734775665467475
1464	pseudarcicella	x3_dehydrocholic_acid_ba	0.042734775665467475
1465	thiohalobacter	allolithocholic_acid_ba	0.0428214
1466	alkalitalea	succinate_s	0.0428829
1467	arthrobacter	methylamine_s	0.0428829
1468	sorangium	x3_6_diketocholanic_acid_ba	0.0428829
1469	blastococcus	taurocholic_acid_tca_ba	0.042894458946902046
1470	aurantimicrobium	glycocholic_acid_gca_ba	0.0429045
1471	serratia	propionate_s	0.0429215
1472	parvibaculum	glycochenodeoxycholic_acid_gcdca_ba	0.0429293
1473	chromobacterium	x8_14_5b_cholenic_acid_3a_12a_diol_ba	0.0429293
1474	plesiomonas	glycodeoxycholic_acid_gdca_ba	0.042997
1475	marichromatium	lithocholenic_acid_ba	0.0430019
1476	brevibacterium	taurochenodeoxycholic_acid_tcdca_ba	0.0430562
1477	jannaschia	lithocholenic_acid_ba	0.043068276628966715
1478	cyclobacterium	chenodeoxycholic_acid_cdca_ba;cholic_acid_ca_ba	0.0433472
1479	symbiobacterium	x5b_cholanic_acid_3b_12a_diol_ba	0.0434283
1480	xanthobacter	aspartate_s	0.0435437
1481	pseudarthrobacter	lithocholenic_acid_ba	0.0435437
1482	obesumbacterium	isodeoxycholic_acid_ba	0.043650704995842705
1483	luteipulveratus	succinate_s	0.043650704995842705
1484	azospira	isolithocholic_acid_ba;lithocholic_acid_ba	0.043685649694911045
1485	candidatus_paracaedibacter	x8_14_5b_cholenic_acid_3a_12a_diol_ba	0.0437463
1486	labrenzia	deoxycholic_acid_dca_ba	0.0438229
1487	pajaroellobacter	lactate_p	0.0438881
1488	mycolicibacterium	trimethylamine_s	0.0439165
1489	geobacter	tauro_w_muricholic_acid_tw_mca_ba	0.0439396
1490	rathayibacter	chenodeoxycholic_acid_cdca_ba	0.044092899007722675
1491	candidatus_phycorickettsia	x5b_cholanic_acid_3a_6a_diol_7_one_ba	0.0441143
1492	fastidiosipila	x3a_hydroxy_7_12_diketo_cholanic_acid_ba	0.044195784276951616
1493	azospira	glycodeoxycholic_acid_gdca_ba	0.0442057
1494	enterobacter	x3a_hydroxy_12_ketolithocholic_acid_ba	0.0442489
1495	brucella	glycocholic_acid_gca_ba	0.0442489
1496	wenzhouxiangella	tauro_w_muricholic_acid_tw_mca_ba	0.0443012
1497	faecalibacterium	tauro_w_muricholic_acid_tw_mca_ba	0.044301955788770254
1498	selenomonas	cholic_acid_ca_ba	0.0443082
1499	gibbsiella	deoxycholic_acid_dca_ba	0.044336
1500	ectothiorhodospira	glycocholic_acid_gca_ba	0.0444004
1501	yersinia	x5b_cholanic_acid_3b_12a_diol_ba	0.0444627
1502	coriobacterium	cholic_acid_ca_ba	0.0444825
1503	elizabethkingia	hyodeoxycholic_acid_ba	0.0444825
1504	nitrospira	x5a_cholanic_acid_3a_ol_6_one_ba	0.0445072
1505	dinoroseobacter	glycochenodeoxycholic_acid_gcdca_ba	0.0445263
1506	porphyrobacter	x8_14_5b_cholenic_acid_3a_12a_diol_ba	0.0445808
1507	syntrophus	x3_dehydrocholic_acid_ba	0.0445808
1508	cellulomonas	glycocholic_acid_gca_ba	0.044583068801032785
1509	octadecabacter	x3a_hydroxy_12_ketolithocholic_acid_ba	0.0446551
1510	pimelobacter	taurocholic_acid_tca_ba	0.044778548363929305
1511	marmoricola	glycocholic_acid_gca_ba	0.044847933128151996
1512	melaminivora	taurochenodeoxycholic_acid_tcdca_ba	0.044884455817021184
1513	desulfobacterium	butyrate_s	0.0449108
1514	acidovorax	x8_14_5b_cholenic_acid_3a_12a_diol_ba	0.0449991
1515	desulfobacca	x3a_hydroxy_12_ketolithocholic_acid_ba	0.0450426
1516	actinotignum	lithocholenic_acid_ba	0.0450426
1517	methanosalsum	ursodeoxycholic_acid_udca_ba	0.0450655
1518	rhizobacter	lithocholenic_acid_ba	0.0450914
1519	borrelia	cholic_acid_ca_ba	0.0450925
1520	zhihengliuella	succinate_s	0.0450925
1521	blastococcus	x3_6_diketocholanic_acid_ba	0.0450925
1522	pararhodospirillum	cholic_acid_ca_ba	0.0451051
1523	confluentimicrobium	x5b_cholanic_acid_3b_12a_diol_ba	0.0451273
1524	thermococcus	glycoursodeoxycholic_acid_gudca_ba	0.045145670990473154
1525	parasaccharibacter	x5b_cholenic_acid_7a_ol_3_one_ba	0.045145670990473154
1526	congregibacter	x3a_hydroxy_12_ketolithocholic_acid_ba	0.045156557929476884
1527	methylobacterium	ursodeoxycholic_acid_udca_ba	0.045156557929476884
1528	ensifer	glycocholic_acid_gca_ba	0.045156557929476884
1529	teredinibacter	x3_dehydrocholic_acid_ba	0.045156557929476884
1530	natronococcus	x8_14_5b_cholenic_acid_3a_12a_diol_ba	0.045291607767323806
1531	planctopirus	taurocholic_acid_tca_ba	0.0453491
1532	simplicispira	methylamine_s	0.045455576214616704
1533	spirosoma	succinate_s	0.045494405102072144
1534	octadecabacter	cholic_acid_ca_ba	0.0455599
1535	shigella	succinate_s	0.045643
1536	shinella	glycodeoxycholic_acid_gdca_ba	0.0456791
1537	raoultella	chenodeoxycholic_acid_cdca_ba	0.0457188
1538	flavobacterium	succinate_s	0.045731303141040465
1539	candidatus_methanomethylophilus	taurocholic_acid_tca_ba	0.0457393
1540	frankia	glycoursodeoxycholic_acid_gudca_ba	0.0457604
1541	saccharopolyspora	glucose_s	0.0458032
1542	rhodococcus	x5b_cholanic_acid_3b_12a_diol_ba	0.045891689238297305
1543	morganella	trimethylamine_s	0.0458929
1544	anabaena	allolithocholic_acid_ba	0.045922556510229334
1545	escherichia	lactate_p	0.0459276
1546	methylacidiphilum	succinate_s	0.045933827618822476
1547	jeongeupia	taurocholic_acid_tca_ba	0.045933827618822476
1548	taylorella	succinate_s	0.0460266
1549	rhodobaca	x5a_cholanic_acid_3a_ol_6_one_ba	0.0460621
1550	ochrobactrum	succinate_s	0.046135743181895464
1551	polymorphum	isolithocholic_acid_ba;lithocholic_acid_ba	0.0461367
1552	alistipes	x3_6_diketocholanic_acid_ba	0.046151
1553	desulfomicrobium	succinate_s	0.046243990366456385
1554	pirellula	x5b_cholanic_acid_3b_12a_diol_ba	0.046456
1555	candidatus_nitrosoglobus	allolithocholic_acid_ba	0.046535744368276996
1556	rhodoplanes	x5b_cholanic_acid_3a_6a_diol_7_one_ba	0.046689173522047316
1557	saccharophagus	glycocholic_acid_gca_ba	0.046749186330385016
1558	dehalobacter	x3a_hydroxy_12_ketolithocholic_acid_ba	0.046821469929490975
1559	candidatus_paracaedibacter	lithocholic_acid_ba	0.046864561798920984
1560	acidihalobacter	glycine_p	0.046864561798920984
1561	thiodictyon	x8_14_5b_cholenic_acid_3a_12a_diol_ba	0.046864561798920984
1562	zhihengliuella	allolithocholic_acid_ba	0.0469133
1563	aromatoleum	succinate_s	0.0470495
1564	rhodospirillum	glycoursodeoxycholic_acid_gudca_ba	0.0470723
1565	rhizobacter	glycocholic_acid_gca_ba	0.0471213
1566	amphibacillus	x3_dehydrocholic_acid_ba	0.0471856
1567	plantactinospora	taurocholic_acid_tca_ba	0.047191298801011375
1568	truepera	glucose_s	0.0472245
1569	miniimonas	propionate_s	0.047254447049478836
1570	calothrix	glycoursocholanic_acid_ba	0.0473494
1571	halopiger	x5b_cholanic_acid_3b_12a_diol_ba	0.0473494
1572	thauera	glycodeoxycholic_acid_gdca_ba	0.0473494
1573	clostridioides	glycocholic_acid_gca_ba	0.0473494
1574	rubinisphaera	x3a_12a_23_nordeoxycholic_acid_ba	0.0474617
1575	hydrogenobacter	propionate_s	0.0474989
1576	natrialba	x5b_cholanic_acid_3a_6a_diol_7_one_ba	0.047568302580902395
1577	gillisia	x3a_hydroxy_12_ketolithocholic_acid_ba	0.047580755045596244
1578	maricaulis	lithocholenic_acid_ba	0.047580755045596244
1579	salinibacter	allolithocholic_acid_ba	0.0476506
1580	hydrogenobaculum	succinate_s	0.0476854
1581	thiolapillus	glycodeoxycholic_acid_gdca_ba	0.0477213
1582	roseibacterium	tauro_w_muricholic_acid_tw_mca_ba	0.0477296
1583	solitalea	glycochenodeoxycholic_acid_gcdca_ba	0.0477296
1584	neisseria	allolithocholic_acid_ba	0.0477327
1585	rickettsia	x3_dehydrocholic_acid_ba	0.0477328
1586	antarctobacter	lithocholenic_acid_ba	0.0478155
1587	turneriella	x3a_hydroxy_12_ketolithocholic_acid_ba	0.0478155
1588	slackia	x5b_cholanic_acid_3b_12a_diol_ba	0.0478171
1589	eubacterium	x3a_hydroxy_12_ketolithocholic_acid_ba	0.0478201
1590	afipia	ursodeoxycholic_acid_udca_ba	0.0478332
1591	methylacidiphilum	glycochenodeoxycholic_acid_gcdca_ba	0.047872
1592	veillonella	x3_hydroxybutyrate_p	0.0479914
1593	alistipes	ursodeoxycholic_acid_udca_ba	0.0480562
1594	homo	citrate_p	0.0481381
1595	candidatus_paracaedibacter	isolithocholic_acid_ba	0.0481381
1596	marivirga	lactate_p	0.0481381
1597	immundisolibacter	x3_6_diketocholanic_acid_ba	0.0482224
1598	aquiflexum	tauro_w_muricholic_acid_tw_mca_ba	0.0483007
1599	microvirga	deoxycholic_acid_dca_ba	0.0483007
1600	gordonia	x3_dehydrocholic_acid_ba	0.0483363
1601	halopenitus	lithocholenic_acid_ba	0.0484383
1602	candidatus_fonsibacter	murocholic_acid_muro_ca_ba	0.0484383
1603	acidipropionibacterium	glycocholic_acid_gca_ba	0.0484383
1604	thermotoga	leucine_p	0.0484383
1605	mordavella	glycocholic_acid_gca_ba	0.0485583
1606	orientia	ursodeoxycholic_acid_udca_ba	0.0485591
1607	serinicoccus	x5b_cholanic_acid_3b_12a_diol_ba	0.0485591
1608	thermovirga	x8_14_5b_cholenic_acid_3a_12a_diol_ba	0.048609345626862456
1609	devosia	alanine_s	0.0486419
1610	cronobacter	aspartate_s	0.0486996
1611	aminobacter	x8_14_5b_cholenic_acid_3a_12a_diol_ba	0.0486996
1612	dactylococcopsis	ursodeoxycholic_acid_udca_ba	0.0486996
1613	yangia	glycodeoxycholic_acid_gdca_ba	0.048712719898900574
1614	desulfatibacillum	murocholic_acid_muro_ca_ba	0.0487679
1615	idiomarina	isodeoxycholic_acid_ba	0.0488041
1616	planctomyces	glycochenodeoxycholic_acid_gcdca_ba	0.0488041
1617	winogradskyella	lactate_p	0.0488518
1618	anaerolinea	ursodeoxycholic_acid_udca_ba	0.0488518
1619	roseburia	x3a_hydroxy_12_ketolithocholic_acid_ba	0.0488518
1620	desulfobulbus	x8_14_5b_cholenic_acid_3a_12a_diol_ba	0.0488518
1621	carboxydocella	butyrate_s	0.0488518
1622	mogibacterium	x3a_hydroxy_7_12_diketo_cholanic_acid_ba	0.0488518
1623	candidatus_endolissoclinum	glycoursocholanic_acid_ba	0.048921266475894315
1624	halopenitus	x3a_hydroxy_12_ketolithocholic_acid_ba	0.0489401
1625	zhihengliuella	x3_dehydrocholic_acid_ba	0.048959556636849595
1626	chondromyces	lithocholenic_acid_ba	0.048960835827949134
1627	lentzea;thermobispora	succinate_s	0.048960835827949134
1628	roseomonas	trimethylamine_s	0.0490677
1629	thioclava	x3a_12a_23_nordeoxycholic_acid_ba	0.0491055
1630	paludibacter	deoxycholic_acid_dca_ba	0.0491068
1631	cellulophaga	taurocholic_acid_tca_ba	0.0491109
1632	xylella	murocholic_acid_muro_ca_ba	0.049286129134035045
1633	yersinia	allolithocholic_acid_ba	0.049308531886671954
1634	janibacter	ursodeoxycholic_acid_udca_ba	0.0493404
1635	roseateles	x8_14_5b_cholenic_acid_3a_12a_diol_ba	0.0494017
1636	synechococcus	taurocholic_acid_tca_ba	0.0496113
1637	fibrella	x3a_hydroxy_12_ketolithocholic_acid_ba	0.0496411
1638	parasaccharibacter	hyodeoxycholic_acid_ba	0.0497714
1639	chelativorans	x5a_cholanic_acid_3a_ol_6_one_ba	0.0498171
1640	methanococcoides	glycoursodeoxycholic_acid_gudca_ba	0.0498237
1641	nocardioides	butyrate_s	0.049845068647561865
1642	fibrobacter	taurocholic_acid_tca_ba	0.049877
1643	thioflavicoccus	glycine_p	0.0498962
1644	aquiflexum	glycoursodeoxycholic_acid_gudca_ba	0.0499071
1645	belliella	x3_6_diketocholanic_acid_ba	0.0499644
1646	leifsonia	lactate_p	0.0499644
1647	bradyrhizobium	glycoursodeoxycholic_acid_gudca_ba	0.0499644
1648	spongiibacterium	x5b_cholenic_acid_7a_ol_3_one_ba	0.0499644
1649	turneriella	ursodeoxycholic_acid_udca_ba	0.049972507343598954
