# Supplementary material for: Statistical and computational methods for integrating microbiome, host genomics, and metabolomics data
Source: eLife. 2024 Jun 4;13:e88956. doi: 10.7554/eLife.88956 (PMC11149933; doi:10.7554/eLife.88956)
Supplement: Supplementary file 3. — Table of regression coefficients, standard errors, z-scores, and p-values from the model regressing each metabolite on each microbe and prior surgery status. Adjusted p-values, after false discovery rate (FDR) correction at the 0.05 level, for the microbe coefficient are reported as well. Models are fit at both baseline and week 6. [file elife-88956-supp3.xlsx]

## Sheet: Baseline
metabolite	microbe	term	estimate	std.error	statistic	p.value	pval.adj
x2_hydroxybutyrate_p	acaryochloris	(Intercept)	-3.88416	0.102615	-37.8515	9.13431958247469e-36	1
x2_hydroxybutyrate_p	acaryochloris	acaryochloris	-7961.04	19473.2	-0.408821	0.68461	1
x2_hydroxybutyrate_p	acaryochloris	intest_surgery1	-0.260519	0.144845	-1.7986	0.0787918	1
x3_hydroxybutyrate_p	acaryochloris	(Intercept)	-3.8031	0.181126	-20.997	6.97607079341826e-25	1
x3_hydroxybutyrate_p	acaryochloris	acaryochloris	27366.6	34372	0.796189	0.430103	1
x3_hydroxybutyrate_p	acaryochloris	intest_surgery1	-0.201204	0.255666	-0.786979	0.435419	1
x3_hydroxyisovalerate_p	acaryochloris	(Intercept)	-4.67273	0.0286526	-163.082	4.9633082577344e-64	1
x3_hydroxyisovalerate_p	acaryochloris	acaryochloris	-2799.96	5437.36	-0.514947	0.60911	1
x3_hydroxyisovalerate_p	acaryochloris	intest_surgery1	0.0294044	0.0404442	0.727036	0.470969	1
acetate_p	acaryochloris	(Intercept)	-2.95561	0.0526323	-56.1559	2.58173993505873e-43	1
acetate_p	acaryochloris	acaryochloris	9595.23	9987.94	0.960682	0.341846	1
acetate_p	acaryochloris	intest_surgery1	0.089014	0.0742923	1.19816	0.237128	1
acetoacetate_p	acaryochloris	(Intercept)	-4.15328	0.0996622	-41.6736	1.35456135290439e-37	1
acetoacetate_p	acaryochloris	acaryochloris	15659.1	18912.7	0.827967	0.412059	1
acetoacetate_p	acaryochloris	intest_surgery1	-0.0370495	0.140677	-0.263366	0.793471	1
alanine_p	acaryochloris	(Intercept)	-1.3975	0.0572679	-24.4029	1.37590291485737e-27	1
alanine_p	acaryochloris	acaryochloris	-8680.88	10867.6	-0.798783	0.428612	1
alanine_p	acaryochloris	intest_surgery1	0.170566	0.0808356	2.11003	0.0404486	1
citrate_p	acaryochloris	(Intercept)	-2.50222	0.0553384	-45.2167	3.74592332095796e-39	1
citrate_p	acaryochloris	acaryochloris	5220.05	10501.5	0.497078	0.621554	1
citrate_p	acaryochloris	intest_surgery1	-0.0411594	0.0781121	-0.526927	0.600832	1
creatinine_p	acaryochloris	(Intercept)	-3.84596	0.0669562	-57.44	9.46247964156455e-44	1
creatinine_p	acaryochloris	acaryochloris	12134.4	12706.2	0.955	0.34468	1
creatinine_p	acaryochloris	intest_surgery1	-0.110736	0.0945111	-1.17168	0.247493	1
formate_p	acaryochloris	(Intercept)	-2.9018	0.0579881	-50.0413	4.26659038892743e-41	1
formate_p	acaryochloris	acaryochloris	4659.3	11004.3	0.423407	0.674015	1
formate_p	acaryochloris	intest_surgery1	0.0749192	0.0818523	0.915297	0.364915	1
glucose_p	acaryochloris	(Intercept)	1.13265	0.0361567	31.3261	3.35414394284891e-32	1
glucose_p	acaryochloris	acaryochloris	1930.79	6861.39	0.281399	0.779695	1
glucose_p	acaryochloris	intest_surgery1	-0.0132469	0.0510364	-0.259557	0.79639	1
glutamine_p	acaryochloris	(Intercept)	-1.07433	0.036267	-29.6228	3.70480588182571e-31	1
glutamine_p	acaryochloris	acaryochloris	-4528.48	6882.33	-0.657987	0.513899	1
glutamine_p	acaryochloris	intest_surgery1	0.117362	0.0511922	2.29257	0.0266009	1
glycine_p	acaryochloris	(Intercept)	-1.76321	0.0676841	-26.0505	8.79900928178185e-29	1
glycine_p	acaryochloris	acaryochloris	-9765.15	12844.3	-0.760271	0.451058	1
glycine_p	acaryochloris	intest_surgery1	0.182133	0.0955386	1.90638	0.0629995	1
histidine_p	acaryochloris	(Intercept)	-2.90154	0.0523117	-55.4663	4.46693913375128e-43	1
histidine_p	acaryochloris	acaryochloris	-4305.39	9927.1	-0.433701	0.666578	1
histidine_p	acaryochloris	intest_surgery1	0.0434989	0.0738398	0.589099	0.558741	1
isoleucine_p	acaryochloris	(Intercept)	-3.4227	0.0573725	-59.6574	1.7584519938228e-44	1
isoleucine_p	acaryochloris	acaryochloris	3495.95	10887.5	0.321098	0.749623	1
isoleucine_p	acaryochloris	intest_surgery1	0.0134414	0.0809833	0.165977	0.868919	1
isopropanol_p	acaryochloris	(Intercept)	-5.05077	0.318423	-15.8618	4.79219983748112e-20	1
isopropanol_p	acaryochloris	acaryochloris	-17822.7	60426.6	-0.294948	0.76939	1
isopropanol_p	acaryochloris	intest_surgery1	-0.183137	0.449465	-0.407456	0.685605	1
lactate_p	acaryochloris	(Intercept)	-0.0780025	0.0685396	-1.13806	0.261117	1
lactate_p	acaryochloris	acaryochloris	-15517.7	13006.7	-1.19306	0.239099	1
lactate_p	acaryochloris	intest_surgery1	0.0139676	0.0967462	0.144373	0.88585	1
leucine_p	acaryochloris	(Intercept)	-2.86931	0.0564005	-50.8737	2.05654324024626e-41	1
leucine_p	acaryochloris	acaryochloris	9664.78	10703	0.902994	0.371338	1
leucine_p	acaryochloris	intest_surgery1	0.0217243	0.0796114	0.272879	0.786195	1
lysine_p	acaryochloris	(Intercept)	-2.46954	0.0508404	-48.5744	1.58917579354139e-40	1
lysine_p	acaryochloris	acaryochloris	-9637.95	9647.89	-0.99897	0.323151	1
lysine_p	acaryochloris	intest_surgery1	0.0276825	0.071763	0.385749	0.7015	1
phenylalanine_p	acaryochloris	(Intercept)	-3.30995	0.0425073	-77.8678	1.22572398611123e-49	1
phenylalanine_p	acaryochloris	acaryochloris	-573.195	8066.54	-0.0710583	0.943666	1
phenylalanine_p	acaryochloris	intest_surgery1	-0.0668867	0.0600006	-1.11477	0.270868	1
pyruvate_p	acaryochloris	(Intercept)	-3.16212	0.0807712	-39.1491	2.09385951185084e-36	1
pyruvate_p	acaryochloris	acaryochloris	-24377.7	15327.8	-1.59042	0.118742	1
pyruvate_p	acaryochloris	intest_surgery1	-0.0084644	0.114011	-0.0742417	0.941147	1
tryptophan_p	acaryochloris	(Intercept)	-3.50836	0.0603517	-58.1318	5.5597896617938e-44	1
tryptophan_p	acaryochloris	acaryochloris	10640.9	11452.8	0.929108	0.35779	1
tryptophan_p	acaryochloris	intest_surgery1	-0.0351715	0.0851886	-0.412867	0.681665	1
tyrosine_p	acaryochloris	(Intercept)	-3.19516	0.0562597	-56.7931	1.5645285135379e-43	1
tyrosine_p	acaryochloris	acaryochloris	5011.64	10676.3	0.469417	0.641038	1
tyrosine_p	acaryochloris	intest_surgery1	-0.0221487	0.0794126	-0.278907	0.781594	1
valine_p	acaryochloris	(Intercept)	-1.98522	0.0472644	-42.0024	9.59400234079426e-38	1
valine_p	acaryochloris	acaryochloris	-1176.62	8969.29	-0.131183	0.896215	1
valine_p	acaryochloris	intest_surgery1	-0.0693121	0.0667154	-1.03892	0.304392	1
acetate_s	acaryochloris	(Intercept)	4.26885	0.0650291	65.6453	2.49282708757547e-46	1
acetate_s	acaryochloris	acaryochloris	23039.8	12340.5	1.86701	0.068423	1
acetate_s	acaryochloris	intest_surgery1	-0.118622	0.0917909	-1.29231	0.202847	1
alanine_s	acaryochloris	(Intercept)	1.19345	0.105222	11.3422	8.70356592465787e-15	1
alanine_s	acaryochloris	acaryochloris	-33447.2	19967.8	-1.67506	0.10086	1
alanine_s	acaryochloris	intest_surgery1	0.191089	0.148525	1.28658	0.204819	1
aspartate_s	acaryochloris	(Intercept)	0.629441	0.111077	5.66669	9.73052250635417e-07	1
aspartate_s	acaryochloris	acaryochloris	-8289.64	21079	-0.393266	0.69598	1
aspartate_s	acaryochloris	intest_surgery1	-0.322446	0.15679	-2.05655	0.0455559	1
butyrate_s	acaryochloris	(Intercept)	2.57304	0.146793	17.5284	9.87527614079048e-22	1
butyrate_s	acaryochloris	acaryochloris	56112	27856.7	2.01431	0.0499775	1
butyrate_s	acaryochloris	intest_surgery1	-0.340813	0.207204	-1.64482	0.106975	1
formate_s	acaryochloris	(Intercept)	-1.20288	0.164423	-7.31579	3.47433054791807e-09	1
formate_s	acaryochloris	acaryochloris	-25115.9	31202.2	-0.80494	0.425087	1
formate_s	acaryochloris	intest_surgery1	0.119483	0.232088	0.514815	0.609202	1
glucose_s	acaryochloris	(Intercept)	2.04032	0.155345	13.1341	5.31024944882684e-17	1
glucose_s	acaryochloris	acaryochloris	-4364.78	29479.6	-0.148061	0.882956	1
glucose_s	acaryochloris	intest_surgery1	0.103747	0.219276	0.473136	0.638403	1
glutamate_s	acaryochloris	(Intercept)	1.4001	0.138339	10.1208	3.56533747552972e-13	1
glutamate_s	acaryochloris	acaryochloris	-6413.66	26252.3	-0.244308	0.808103	1
glutamate_s	acaryochloris	intest_surgery1	-0.286559	0.19527	-1.4675	0.149195	1
glutamine_s	acaryochloris	(Intercept)	0.578735	0.111201	5.20441	4.64396513441492e-06	1
glutamine_s	acaryochloris	acaryochloris	-9908.99	21102.4	-0.469567	0.640932	1
glutamine_s	acaryochloris	intest_surgery1	-0.294239	0.156964	-1.87456	0.0673529	1
histidine_s	acaryochloris	(Intercept)	-0.492214	0.138722	-3.54819	0.000920748	1
histidine_s	acaryochloris	acaryochloris	-23880	26325.1	-0.907119	0.369176	1
histidine_s	acaryochloris	intest_surgery1	0.0908919	0.195812	0.46418	0.644756	1
isoleucine_s	acaryochloris	(Intercept)	0.787093	0.101729	7.73719	8.33933200547096e-10	1
isoleucine_s	acaryochloris	acaryochloris	-16004.3	19304.9	-0.82903	0.411463	1
isoleucine_s	acaryochloris	intest_surgery1	-0.0802741	0.143593	-0.559037	0.578908	1
lactate_s	acaryochloris	(Intercept)	0.770075	0.138745	5.5503	1.44480302434743e-06	1
lactate_s	acaryochloris	acaryochloris	-22991.6	26329.4	-0.873231	0.387173	1
lactate_s	acaryochloris	intest_surgery1	-0.016494	0.195843	-0.0842204	0.933255	1
leucine_s	acaryochloris	(Intercept)	1.11152	0.119133	9.3301	4.35867825253389e-12	1
leucine_s	acaryochloris	acaryochloris	-17001.9	22607.6	-0.752042	0.455942	1
leucine_s	acaryochloris	intest_surgery1	-0.0196792	0.16816	-0.117026	0.90736	1
methylamine_s	acaryochloris	(Intercept)	-1.27127	0.23133	-5.49547	1.73992411836403e-06	1
methylamine_s	acaryochloris	acaryochloris	3811.85	43899.1	0.0868321	0.93119	1
methylamine_s	acaryochloris	intest_surgery1	-0.868531	0.32653	-2.65988	0.0107919	1
phenylalanine_s	acaryochloris	(Intercept)	0.563439	0.10961	5.14038	5.75626737325556e-06	1
phenylalanine_s	acaryochloris	acaryochloris	-25191.9	20800.6	-1.21111	0.232174	1
phenylalanine_s	acaryochloris	intest_surgery1	0.0900417	0.154719	0.581969	0.563492	1
propionate_s	acaryochloris	(Intercept)	3.12756	0.0849071	36.8351	2.99479073622232e-35	1
propionate_s	acaryochloris	acaryochloris	-9057.37	16112.7	-0.562127	0.576819	1
propionate_s	acaryochloris	intest_surgery1	-0.0210611	0.119849	-0.17573	0.861294	1
succinate_s	acaryochloris	(Intercept)	0.0607398	0.484298	0.125418	0.900751	1
succinate_s	acaryochloris	acaryochloris	-145501	91904.5	-1.58317	0.120386	1
succinate_s	acaryochloris	intest_surgery1	0.679577	0.683604	0.994109	0.325486	1
trimethylamine_s	acaryochloris	(Intercept)	-1.75149	0.147277	-11.8925	1.74036640454898e-15	1
trimethylamine_s	acaryochloris	acaryochloris	-32352.3	27948.5	-1.15757	0.253148	1
trimethylamine_s	acaryochloris	intest_surgery1	0.0984713	0.207887	0.473678	0.63802	1
tyrosine_s	acaryochloris	(Intercept)	0.640924	0.0988139	6.48617	5.91098785842564e-08	1
tyrosine_s	acaryochloris	acaryochloris	-22798.3	18751.7	-1.21579	0.230403	1
tyrosine_s	acaryochloris	intest_surgery1	-0.0268642	0.139479	-0.192604	0.848136	1
valine_s	acaryochloris	(Intercept)	1.27128	0.128283	9.91	6.89773004861863e-13	1
valine_s	acaryochloris	acaryochloris	-20188.8	24344	-0.829314	0.411304	1
valine_s	acaryochloris	intest_surgery1	-0.0241763	0.181076	-0.133515	0.894382	1
lithocholenic_acid_ba	acaryochloris	(Intercept)	3.37891	0.466963	7.23592	4.55882833885958e-09	1
lithocholenic_acid_ba	acaryochloris	acaryochloris	72263.8	88614.8	0.815482	0.419092	1
lithocholenic_acid_ba	acaryochloris	intest_surgery1	-1.75459	0.659135	-2.66196	0.0107348	1
isolithocholic_acid_ba	acaryochloris	(Intercept)	6.27039	0.415473	15.0922	3.17679544545926e-19	1
isolithocholic_acid_ba	acaryochloris	acaryochloris	59788.9	78843.6	0.758323	0.452211	1
isolithocholic_acid_ba	acaryochloris	intest_surgery1	-1.81522	0.586455	-3.09524	0.00337787	1
allolithocholic_acid_ba	acaryochloris	(Intercept)	1.48338	0.405439	3.65869	0.000662368	1
allolithocholic_acid_ba	acaryochloris	acaryochloris	89912	76939.5	1.16861	0.248716	1
allolithocholic_acid_ba	acaryochloris	intest_surgery1	-1.28713	0.572291	-2.24908	0.029448	1
x3a_12a_23_nordeoxycholic_acid_ba	acaryochloris	(Intercept)	-3.13283	0.461935	-6.78197	2.14691075195332e-08	1
x3a_12a_23_nordeoxycholic_acid_ba	acaryochloris	acaryochloris	34694.4	87660.6	0.395781	0.694137	1
x3a_12a_23_nordeoxycholic_acid_ba	acaryochloris	intest_surgery1	-0.12908	0.652038	-0.197965	0.843964	1
x3_6_diketocholanic_acid_ba	acaryochloris	(Intercept)	2.4689	0.393139	6.27996	1.19790662174626e-07	1
x3_6_diketocholanic_acid_ba	acaryochloris	acaryochloris	73135.3	74605.3	0.980297	0.332181	1
x3_6_diketocholanic_acid_ba	acaryochloris	intest_surgery1	-0.610841	0.554929	-1.10076	0.276856	1
x8_14_5b_cholenic_acid_3a_12a_diol_ba	acaryochloris	(Intercept)	4.78007	0.629381	7.59487	1.3485436390788e-09	1
x8_14_5b_cholenic_acid_3a_12a_diol_ba	acaryochloris	acaryochloris	120344	119437	1.0076	0.319034	1
x8_14_5b_cholenic_acid_3a_12a_diol_ba	acaryochloris	intest_surgery1	-2.65565	0.888394	-2.98927	0.00451985	1
x5b_cholenic_acid_7a_ol_3_one_ba	acaryochloris	(Intercept)	3.68073	0.267364	13.7668	9.66277847552748e-18	1
x5b_cholenic_acid_7a_ol_3_one_ba	acaryochloris	acaryochloris	14241.4	50737.1	0.28069	0.780235	1
x5b_cholenic_acid_7a_ol_3_one_ba	acaryochloris	intest_surgery1	-0.18338	0.377393	-0.485912	0.629387	1
x5a_cholanic_acid_3a_ol_6_one_ba	acaryochloris	(Intercept)	1.5183	1.04237	1.45658	0.152175	1
x5a_cholanic_acid_3a_ol_6_one_ba	acaryochloris	acaryochloris	61822.6	197809	0.312537	0.756077	1
x5a_cholanic_acid_3a_ol_6_one_ba	acaryochloris	intest_surgery1	-0.884956	1.47135	-0.60146	0.550552	1
x3a_hydroxy_12_ketolithocholic_acid_ba	acaryochloris	(Intercept)	2.37688	0.563014	4.22171	0.000116207	1
x3a_hydroxy_12_ketolithocholic_acid_ba	acaryochloris	acaryochloris	-70035.1	106842	-0.655501	0.515483	1
x3a_hydroxy_12_ketolithocholic_acid_ba	acaryochloris	intest_surgery1	1.65996	0.794714	2.08875	0.0424169	1
lithocholic_acid_ba	acaryochloris	(Intercept)	6.3051	0.417601	15.0984	3.12806278505593e-19	1
lithocholic_acid_ba	acaryochloris	acaryochloris	60670.5	79247.5	0.765582	0.447922	1
lithocholic_acid_ba	acaryochloris	intest_surgery1	-1.82933	0.589459	-3.10341	0.00330217	1
x5b_cholanic_acid_3b_12a_diol_ba	acaryochloris	(Intercept)	2.78746	0.308005	9.05005	1.07694835858706e-11	1
x5b_cholanic_acid_3b_12a_diol_ba	acaryochloris	acaryochloris	-26353.3	58449.5	-0.450873	0.654246	1
x5b_cholanic_acid_3b_12a_diol_ba	acaryochloris	intest_surgery1	0.0630406	0.434759	0.145001	0.885358	1
chenodeoxycholic_acid_cdca_ba	acaryochloris	(Intercept)	3.32908	0.807928	4.12052	0.00015999	1
chenodeoxycholic_acid_cdca_ba	acaryochloris	acaryochloris	-37312.6	153319	-0.243366	0.808828	1
chenodeoxycholic_acid_cdca_ba	acaryochloris	intest_surgery1	2.26546	1.14042	1.98651	0.0530866	1
deoxycholic_acid_dca_ba	acaryochloris	(Intercept)	6.57669	0.880351	7.47053	2.05452786467735e-09	1
deoxycholic_acid_dca_ba	acaryochloris	acaryochloris	151200	167063	0.905048	0.37026	1
deoxycholic_acid_dca_ba	acaryochloris	intest_surgery1	-3.96612	1.24265	-3.19167	0.00257998	1
hyodeoxycholic_acid_ba	acaryochloris	(Intercept)	4.58111	0.319272	14.3486	2.10394688124247e-18	1
hyodeoxycholic_acid_ba	acaryochloris	acaryochloris	48750.8	60587.7	0.804633	0.425263	1
hyodeoxycholic_acid_ba	acaryochloris	intest_surgery1	-0.365786	0.450664	-0.811661	0.421259	1
isodeoxycholic_acid_ba	acaryochloris	(Intercept)	-2.69198	0.768106	-3.5047	0.00104689	1
isodeoxycholic_acid_ba	acaryochloris	acaryochloris	201543	145762	1.38268	0.173586	1
isodeoxycholic_acid_ba	acaryochloris	intest_surgery1	-1.2963	1.08421	-1.19562	0.238107	1
murocholic_acid_muro_ca_ba	acaryochloris	(Intercept)	2.00703	0.743707	2.69868	0.0097684	1
murocholic_acid_muro_ca_ba	acaryochloris	acaryochloris	7014.45	141132	0.0497013	0.96058	1
murocholic_acid_muro_ca_ba	acaryochloris	intest_surgery1	0.375066	1.04977	0.357284	0.722549	1
ursodeoxycholic_acid_udca_ba	acaryochloris	(Intercept)	3.53219	0.355599	9.93307	6.41540163877985e-13	1
ursodeoxycholic_acid_udca_ba	acaryochloris	acaryochloris	-33026.7	67481.4	-0.489419	0.626922	1
ursodeoxycholic_acid_udca_ba	acaryochloris	intest_surgery1	0.606748	0.501941	1.2088	0.233052	1
x3a_hydroxy_7_12_diketo_cholanic_acid_ba	acaryochloris	(Intercept)	-1.77358	0.432323	-4.10244	0.000169345	1
x3a_hydroxy_7_12_diketo_cholanic_acid_ba	acaryochloris	acaryochloris	-8773.71	82041.3	-0.106943	0.91531	1
x3a_hydroxy_7_12_diketo_cholanic_acid_ba	acaryochloris	intest_surgery1	0.430718	0.61024	0.705818	0.483939	1
x5b_cholanic_acid_3a_6a_diol_7_one_ba	acaryochloris	(Intercept)	-1.63182	0.399594	-4.08369	0.00017961	1
x5b_cholanic_acid_3a_6a_diol_7_one_ba	acaryochloris	acaryochloris	45709	75830.3	0.60278	0.549681	1
x5b_cholanic_acid_3a_6a_diol_7_one_ba	acaryochloris	intest_surgery1	-0.376834	0.564041	-0.668096	0.507485	1
x3_dehydrocholic_acid_ba	acaryochloris	(Intercept)	0.435695	0.631073	0.690403	0.493486	1
x3_dehydrocholic_acid_ba	acaryochloris	acaryochloris	-36072.7	119758	-0.301214	0.764639	1
x3_dehydrocholic_acid_ba	acaryochloris	intest_surgery1	1.18401	0.890782	1.32918	0.190488	1
cholic_acid_ca_ba	acaryochloris	(Intercept)	3.96361	0.551815	7.18287	5.46153637158774e-09	1
cholic_acid_ca_ba	acaryochloris	acaryochloris	-93485.8	104717	-0.892747	0.376742	1
cholic_acid_ca_ba	acaryochloris	intest_surgery1	1.31081	0.778906	1.68288	0.099325	1
hyocholic_acid_hca_ba	acaryochloris	(Intercept)	0.874909	0.237345	3.68624	0.000609743	1
hyocholic_acid_hca_ba	acaryochloris	acaryochloris	-39215.2	45040.6	-0.870664	0.388559	1
hyocholic_acid_hca_ba	acaryochloris	intest_surgery1	-0.154814	0.335021	-0.462102	0.646235	1
glycoursocholanic_acid_ba	acaryochloris	(Intercept)	-5.3873	0.478123	-11.2676	1.08597723879763e-14	1
glycoursocholanic_acid_ba	acaryochloris	acaryochloris	14531.3	90732.6	0.160155	0.873476	1
glycoursocholanic_acid_ba	acaryochloris	intest_surgery1	0.801074	0.674888	1.18697	0.241466	1
glycolithocholic_acid_glca_ba	acaryochloris	(Intercept)	-2.05459	0.355092	-5.78607	6.48065736893306e-07	1
glycolithocholic_acid_glca_ba	acaryochloris	acaryochloris	29604	67385.2	0.439324	0.662529	1
glycolithocholic_acid_glca_ba	acaryochloris	intest_surgery1	-0.121371	0.501225	-0.242148	0.809766	1
glycoursodeoxycholic_acid_gudca_ba	acaryochloris	(Intercept)	-2.8988	0.688812	-4.2084	0.000121215	1
glycoursodeoxycholic_acid_gudca_ba	acaryochloris	acaryochloris	-17329.8	130715	-0.132577	0.895119	1
glycoursodeoxycholic_acid_gudca_ba	acaryochloris	intest_surgery1	-0.321658	0.972283	-0.330828	0.74231	1
glycochenodeoxycholic_acid_gcdca_ba	acaryochloris	(Intercept)	1.23752	0.276146	4.48139	5.05553710156691e-05	1
glycochenodeoxycholic_acid_gcdca_ba	acaryochloris	acaryochloris	-1961.37	52403.8	-0.0374281	0.970309	1
glycochenodeoxycholic_acid_gcdca_ba	acaryochloris	intest_surgery1	0.490751	0.38979	1.25901	0.214517	1
glycodeoxycholic_acid_gdca_ba	acaryochloris	(Intercept)	0.399452	0.483742	0.825756	0.413299	1
glycodeoxycholic_acid_gdca_ba	acaryochloris	acaryochloris	70530.5	91798.9	0.768316	0.446313	1
glycodeoxycholic_acid_gdca_ba	acaryochloris	intest_surgery1	-1.65275	0.682819	-2.42048	0.0195986	1
glycocholic_acid_gca_ba	acaryochloris	(Intercept)	0.356331	0.279987	1.27267	0.209672	1
glycocholic_acid_gca_ba	acaryochloris	acaryochloris	-11802.9	53132.8	-0.22214	0.82521	1
glycocholic_acid_gca_ba	acaryochloris	intest_surgery1	0.468503	0.395212	1.18545	0.242063	1
taurolithocholic_acid_tlca_ba	acaryochloris	(Intercept)	-1.22294	0.569044	-2.14912	0.03704	1
taurolithocholic_acid_tlca_ba	acaryochloris	acaryochloris	-105117	107987	-0.973423	0.335547	1
taurolithocholic_acid_tlca_ba	acaryochloris	intest_surgery1	-1.64838	0.803226	-2.0522	0.0459947	1
taurochenodeoxycholic_acid_tcdca_ba	acaryochloris	(Intercept)	-0.0358845	0.399254	-0.0898787	0.928782	1
taurochenodeoxycholic_acid_tcdca_ba	acaryochloris	acaryochloris	-51975.8	75765.9	-0.686005	0.496229	1
taurochenodeoxycholic_acid_tcdca_ba	acaryochloris	intest_surgery1	0.151451	0.563562	0.268739	0.789359	1
taurodeoxycholic_acid_tdca_ba	acaryochloris	(Intercept)	0.175024	0.523466	0.334356	0.739664	1
taurodeoxycholic_acid_tdca_ba	acaryochloris	acaryochloris	-73474.1	99337.2	-0.739643	0.463358	1
taurodeoxycholic_acid_tdca_ba	acaryochloris	intest_surgery1	-2.34836	0.73889	-3.17823	0.0026794	1
tauro_w_muricholic_acid_tw_mca_ba	acaryochloris	(Intercept)	-2.55867	0.674462	-3.79364	0.000440419	1
tauro_w_muricholic_acid_tw_mca_ba	acaryochloris	acaryochloris	-226897	127992	-1.77275	0.0830396	1
tauro_w_muricholic_acid_tw_mca_ba	acaryochloris	intest_surgery1	0.209463	0.952028	0.220017	0.826853	1
taurocholic_acid_tca_ba	acaryochloris	(Intercept)	0.627005	0.365226	1.71676	0.0928994	1
taurocholic_acid_tca_ba	acaryochloris	acaryochloris	-94590.7	69308.3	-1.36478	0.179107	1
taurocholic_acid_tca_ba	acaryochloris	intest_surgery1	0.32484	0.515529	0.630111	0.531809	1
x2_hydroxybutyrate_p	acetoanaerobium	(Intercept)	-3.88594	0.111931	-34.7174	3.93565549676164e-34	1
x2_hydroxybutyrate_p	acetoanaerobium	acetoanaerobium	-1325.66	6716.66	-0.197369	0.844428	1
x2_hydroxybutyrate_p	acetoanaerobium	intest_surgery1	-0.250492	0.151489	-1.65353	0.105183	1
x3_hydroxybutyrate_p	acetoanaerobium	(Intercept)	-3.94642	0.190108	-20.7588	1.11205228766246e-24	1
x3_hydroxybutyrate_p	acetoanaerobium	acetoanaerobium	23228	11407.9	2.03614	0.0476482	1
x3_hydroxybutyrate_p	acetoanaerobium	intest_surgery1	-0.357486	0.257295	-1.3894	0.171548	1
x3_hydroxyisovalerate_p	acetoanaerobium	(Intercept)	-4.67151	0.0312532	-149.473	2.48680102425212e-62	1
x3_hydroxyisovalerate_p	acetoanaerobium	acetoanaerobium	-696.362	1875.42	-0.371309	0.71215	1
x3_hydroxyisovalerate_p	acetoanaerobium	intest_surgery1	0.0344322	0.0422986	0.814028	0.419916	1
acetate_p	acetoanaerobium	(Intercept)	-2.92887	0.0577975	-50.6747	2.44603172744245e-41	1
acetate_p	acetoanaerobium	acetoanaerobium	-1474.4	3468.28	-0.42511	0.672783	1
acetate_p	acetoanaerobium	intest_surgery1	0.0969726	0.078224	1.23968	0.221521	1
acetoacetate_p	acetoanaerobium	(Intercept)	-4.24399	0.103382	-41.0515	2.62034374837474e-37	1
acetoacetate_p	acetoanaerobium	acetoanaerobium	14378.3	6203.69	2.31769	0.0250708	1
acetoacetate_p	acetoanaerobium	intest_surgery1	-0.133567	0.139919	-0.954603	0.344879	1
alanine_p	acetoanaerobium	(Intercept)	-1.3658	0.0612309	-22.3058	5.79832748243472e-26	1
alanine_p	acetoanaerobium	acetoanaerobium	-5648.96	3674.31	-1.53742	0.131193	1
alanine_p	acetoanaerobium	intest_surgery1	0.208923	0.0828709	2.52107	0.0153119	1
citrate_p	acetoanaerobium	(Intercept)	-2.49566	0.0604394	-41.2919	2.02835606613213e-37	1
citrate_p	acetoanaerobium	acetoanaerobium	195.96	3626.81	0.0540308	0.95715	1
citrate_p	acetoanaerobium	intest_surgery1	-0.0433414	0.0817997	-0.529848	0.598822	1
creatinine_p	acetoanaerobium	(Intercept)	-3.84908	0.0733486	-52.4765	5.20895281701956e-42	1
creatinine_p	acetoanaerobium	acetoanaerobium	2749.57	4401.46	0.624696	0.535325	1
creatinine_p	acetoanaerobium	intest_surgery1	-0.130776	0.0992711	-1.31736	0.194387	1
formate_p	acetoanaerobium	(Intercept)	-2.91142	0.0630708	-46.1612	1.50620222727659e-39	1
formate_p	acetoanaerobium	acetoanaerobium	2108.48	3784.72	0.557104	0.580217	1
formate_p	acetoanaerobium	intest_surgery1	0.0603565	0.0853611	0.707073	0.483167	1
glucose_p	acetoanaerobium	(Intercept)	1.12606	0.0393049	28.6494	1.5470635408373e-30	1
glucose_p	acetoanaerobium	acetoanaerobium	1198.35	2358.59	0.508082	0.613878	1
glucose_p	acetoanaerobium	intest_surgery1	-0.0213994	0.0531959	-0.402275	0.689386	1
glutamine_p	acetoanaerobium	(Intercept)	-1.07124	0.0395678	-27.0736	1.72090847174979e-29	1
glutamine_p	acetoanaerobium	acetoanaerobium	-1266.27	2374.36	-0.53331	0.596443	1
glutamine_p	acetoanaerobium	intest_surgery1	0.126407	0.0535516	2.36047	0.0226458	1
glycine_p	acetoanaerobium	(Intercept)	-1.73631	0.0730357	-23.7734	4.10580271891697e-27	1
glycine_p	acetoanaerobium	acetoanaerobium	-5259.94	4382.68	-1.20016	0.236356	1
glycine_p	acetoanaerobium	intest_surgery1	0.21814	0.0988477	2.20683	0.0324702	1
histidine_p	acetoanaerobium	(Intercept)	-2.86603	0.055575	-51.5704	1.1264275444611e-41	1
histidine_p	acetoanaerobium	acetoanaerobium	-5273.66	3334.91	-1.58135	0.120802	1
histidine_p	acetoanaerobium	intest_surgery1	0.0786508	0.0752161	1.04566	0.301301	1
isoleucine_p	acetoanaerobium	(Intercept)	-3.41122	0.0625353	-54.5488	9.36124891811061e-43	1
isoleucine_p	acetoanaerobium	acetoanaerobium	-753.75	3752.58	-0.200862	0.841712	1
isoleucine_p	acetoanaerobium	intest_surgery1	0.017754	0.0846362	0.209768	0.834796	1
isopropanol_p	acetoanaerobium	(Intercept)	-5.05476	0.347092	-14.5632	1.21138951411247e-18	1
isopropanol_p	acetoanaerobium	acetoanaerobium	-2967.93	20828.1	-0.142497	0.887324	1
isopropanol_p	acetoanaerobium	intest_surgery1	-0.160689	0.46976	-0.342067	0.733893	1
lactate_p	acetoanaerobium	(Intercept)	-0.0336174	0.0727814	-0.461896	0.646381	1
lactate_p	acetoanaerobium	acetoanaerobium	-8563.54	4367.42	-1.96078	0.0561124	1
lactate_p	acetoanaerobium	intest_surgery1	0.072524	0.0985035	0.736258	0.465395	1
leucine_p	acetoanaerobium	(Intercept)	-2.86019	0.0619597	-46.1621	1.50481696644496e-39	1
leucine_p	acetoanaerobium	acetoanaerobium	741.544	3718.04	0.199445	0.842813	1
leucine_p	acetoanaerobium	intest_surgery1	0.0152135	0.0838573	0.181421	0.856852	1
lysine_p	acetoanaerobium	(Intercept)	-2.46292	0.0555836	-44.3102	9.13722484161845e-39	1
lysine_p	acetoanaerobium	acetoanaerobium	-2701.89	3335.43	-0.810058	0.42217	1
lysine_p	acetoanaerobium	intest_surgery1	0.0469784	0.0752277	0.624483	0.535464	1
phenylalanine_p	acetoanaerobium	(Intercept)	-3.28387	0.0455398	-72.1099	3.78451874642737e-48	1
phenylalanine_p	acetoanaerobium	acetoanaerobium	-3369.73	2732.72	-1.2331	0.22394	1
phenylalanine_p	acetoanaerobium	intest_surgery1	-0.0448026	0.0616342	-0.726911	0.471045	1
pyruvate_p	acetoanaerobium	(Intercept)	-3.13637	0.0882287	-35.5482	1.40856330489673e-34	1
pyruvate_p	acetoanaerobium	acetoanaerobium	-7959.1	5294.37	-1.50331	0.139744	1
pyruvate_p	acetoanaerobium	intest_surgery1	0.047682	0.11941	0.399313	0.691552	1
tryptophan_p	acetoanaerobium	(Intercept)	-3.45657	0.0654581	-52.8059	3.94821980397142e-42	1
tryptophan_p	acetoanaerobium	acetoanaerobium	-4399.55	3927.97	-1.12006	0.268632	1
tryptophan_p	acetoanaerobium	intest_surgery1	-0.0083095	0.0885921	-0.093795	0.925688	1
tyrosine_p	acetoanaerobium	(Intercept)	-3.21974	0.0606022	-53.1291	3.01296868364719e-42	1
tyrosine_p	acetoanaerobium	acetoanaerobium	4044.65	3636.58	1.11221	0.271954	1
tyrosine_p	acetoanaerobium	intest_surgery1	-0.0494044	0.08202	-0.602346	0.549967	1
valine_p	acetoanaerobium	(Intercept)	-1.98447	0.0514854	-38.5444	4.13562727761918e-36	1
valine_p	acetoanaerobium	acetoanaerobium	-321.566	3089.5	-0.104083	0.917566	1
valine_p	acetoanaerobium	intest_surgery1	-0.0670104	0.0696811	-0.961673	0.341353	1
acetate_s	acetoanaerobium	(Intercept)	4.20298	0.066398	63.2998	1.25974071740228e-45	1
acetate_s	acetoanaerobium	acetoanaerobium	12710.5	3984.37	3.1901	0.00259139	1
acetate_s	acetoanaerobium	intest_surgery1	-0.205537	0.0898642	-2.28719	0.0269394	1
alanine_s	acetoanaerobium	(Intercept)	1.20857	0.116275	10.3941	1.52809457864404e-13	1
alanine_s	acetoanaerobium	acetoanaerobium	-8394.23	6977.33	-1.20307	0.23524	1
alanine_s	acetoanaerobium	intest_surgery1	0.251644	0.157368	1.59908	0.116801	1
aspartate_s	acetoanaerobium	(Intercept)	0.535242	0.118541	4.51524	4.53065066872375e-05	1
aspartate_s	acetoanaerobium	acetoanaerobium	10156.1	7113.35	1.42775	0.160266	1
aspartate_s	acetoanaerobium	intest_surgery1	-0.387272	0.160436	-2.41388	0.0199149	1
butyrate_s	acetoanaerobium	(Intercept)	2.42276	0.149767	16.1768	2.2507995660692e-20	1
butyrate_s	acetoanaerobium	acetoanaerobium	29690.2	8987.13	3.30364	0.00187724	1
butyrate_s	acetoanaerobium	intest_surgery1	-0.544231	0.202697	-2.68495	0.01012	1
formate_s	acetoanaerobium	(Intercept)	-1.21597	0.180198	-6.74797	2.41177999935045e-08	1
formate_s	acetoanaerobium	acetoanaerobium	-3250.26	10813.2	-0.300583	0.765117	1
formate_s	acetoanaerobium	intest_surgery1	0.145035	0.243882	0.594693	0.555027	1
glucose_s	acetoanaerobium	(Intercept)	1.96091	0.167741	11.6901	3.13119688074386e-15	1
glucose_s	acetoanaerobium	acetoanaerobium	9071.95	10065.7	0.901276	0.37224	1
glucose_s	acetoanaerobium	intest_surgery1	0.0453149	0.227023	0.199605	0.842689	1
glutamate_s	acetoanaerobium	(Intercept)	1.36204	0.15053	9.04827	1.08320762101962e-11	1
glutamate_s	acetoanaerobium	acetoanaerobium	3507.18	9032.93	0.388266	0.69965	1
glutamate_s	acetoanaerobium	intest_surgery1	-0.30833	0.20373	-1.51343	0.137164	1
glutamine_s	acetoanaerobium	(Intercept)	0.468444	0.117796	3.97674	0.000250758	1
glutamine_s	acetoanaerobium	acetoanaerobium	11851.6	7068.62	1.67665	0.100545	1
glutamine_s	acetoanaerobium	intest_surgery1	-0.369847	0.159427	-2.31985	0.0249432	1
histidine_s	acetoanaerobium	(Intercept)	-0.486247	0.151886	-3.20139	0.00251028	1
histidine_s	acetoanaerobium	acetoanaerobium	-5390.41	9114.3	-0.591423	0.557196	1
histidine_s	acetoanaerobium	intest_surgery1	0.130193	0.205565	0.633343	0.529716	1
isoleucine_s	acetoanaerobium	(Intercept)	0.746758	0.111546	6.69462	2.89494166884974e-08	1
isoleucine_s	acetoanaerobium	acetoanaerobium	1926.09	6693.58	0.287751	0.774858	1
isoleucine_s	acetoanaerobium	intest_surgery1	-0.0900704	0.150968	-0.596619	0.553752	1
lactate_s	acetoanaerobium	(Intercept)	0.744448	0.152367	4.88589	1.34379285857859e-05	1
lactate_s	acetoanaerobium	acetoanaerobium	-1270.54	9143.15	-0.138961	0.890101	1
lactate_s	acetoanaerobium	intest_surgery1	-0.00422534	0.206216	-0.0204899	0.983743	1
leucine_s	acetoanaerobium	(Intercept)	1.07851	0.13056	8.26065	1.44354774560297e-10	1
leucine_s	acetoanaerobium	acetoanaerobium	817.162	7834.55	0.104302	0.917393	1
leucine_s	acetoanaerobium	intest_surgery1	-0.0220679	0.176702	-0.124888	0.901169	1
methylamine_s	acetoanaerobium	(Intercept)	-1.41106	0.2479	-5.69205	8.9262655939481e-07	1
methylamine_s	acetoanaerobium	acetoanaerobium	18206.2	14875.8	1.22388	0.227368	1
methylamine_s	acetoanaerobium	intest_surgery1	-0.987973	0.335512	-2.94467	0.00510113	1
phenylalanine_s	acetoanaerobium	(Intercept)	0.556196	0.120914	4.59992	3.44017172771578e-05	1
phenylalanine_s	acetoanaerobium	acetoanaerobium	-3995.26	7255.75	-0.550634	0.584608	1
phenylalanine_s	acetoanaerobium	intest_surgery1	0.120468	0.163647	0.736144	0.465463	1
propionate_s	acetoanaerobium	(Intercept)	3.08734	0.0924525	33.3938	2.12277684607891e-33	1
propionate_s	acetoanaerobium	acetoanaerobium	3263.44	5547.83	0.588238	0.559314	1
propionate_s	acetoanaerobium	intest_surgery1	-0.040785	0.125127	-0.32595	0.745973	1
succinate_s	acetoanaerobium	(Intercept)	0.119107	0.534742	0.222737	0.824748	1
succinate_s	acetoanaerobium	acetoanaerobium	-35593.7	32088.5	-1.10924	0.273221	1
succinate_s	acetoanaerobium	intest_surgery1	0.936982	0.723728	1.29466	0.202041	1
trimethylamine_s	acetoanaerobium	(Intercept)	-1.74471	0.16182	-10.7818	4.66833933692379e-14	1
trimethylamine_s	acetoanaerobium	acetoanaerobium	-7139.37	9710.39	-0.73523	0.466014	1
trimethylamine_s	acetoanaerobium	intest_surgery1	0.15065	0.21901	0.687868	0.495067	1
tyrosine_s	acetoanaerobium	(Intercept)	0.633263	0.109043	5.80748	6.02462785082946e-07	1
tyrosine_s	acetoanaerobium	acetoanaerobium	-3477.41	6543.36	-0.531442	0.597726	1
tyrosine_s	acetoanaerobium	intest_surgery1	-0.000230864	0.14758	-0.00156433	0.998759	1
valine_s	acetoanaerobium	(Intercept)	1.24191	0.140792	8.82089	2.27248878771163e-11	1
valine_s	acetoanaerobium	acetoanaerobium	-256.975	8448.53	-0.0304165	0.975869	1
valine_s	acetoanaerobium	intest_surgery1	-0.0190055	0.19055	-0.0997402	0.920994	1
lithocholenic_acid_ba	acetoanaerobium	(Intercept)	3.17087	0.502623	6.30865	1.08581024032216e-07	1
lithocholenic_acid_ba	acetoanaerobium	acetoanaerobium	40046.9	30161.1	1.32777	0.190951	1
lithocholenic_acid_ba	acetoanaerobium	intest_surgery1	-2.02837	0.680258	-2.98177	0.00461305	1
isolithocholic_acid_ba	acetoanaerobium	(Intercept)	5.89324	0.43141	13.6604	1.28233255897151e-17	1
isolithocholic_acid_ba	acetoanaerobium	acetoanaerobium	58748.3	25887.8	2.26934	0.0280895	1
isolithocholic_acid_ba	acetoanaerobium	intest_surgery1	-2.20885	0.583877	-3.78308	0.000454815	1
allolithocholic_acid_ba	acetoanaerobium	(Intercept)	1.38614	0.442179	3.13479	0.00302591	1
allolithocholic_acid_ba	acetoanaerobium	acetoanaerobium	29637.1	26534	1.11695	0.269945	1
allolithocholic_acid_ba	acetoanaerobium	intest_surgery1	-1.49605	0.598452	-2.49987	0.0161371	1
x3a_12a_23_nordeoxycholic_acid_ba	acetoanaerobium	(Intercept)	-3.29273	0.499636	-6.59026	4.13833787738442e-08	1
x3a_12a_23_nordeoxycholic_acid_ba	acetoanaerobium	acetoanaerobium	26725.2	29981.8	0.891378	0.377468	1
x3a_12a_23_nordeoxycholic_acid_ba	acetoanaerobium	intest_surgery1	-0.309447	0.676215	-0.457616	0.64943	1
x3_6_diketocholanic_acid_ba	acetoanaerobium	(Intercept)	2.53831	0.432546	5.8683	4.89592129028021e-07	1
x3_6_diketocholanic_acid_ba	acetoanaerobium	acetoanaerobium	5554.09	25955.9	0.213982	0.831528	1
x3_6_diketocholanic_acid_ba	acetoanaerobium	intest_surgery1	-0.659736	0.585414	-1.12696	0.265735	1
x8_14_5b_cholenic_acid_3a_12a_diol_ba	acetoanaerobium	(Intercept)	4.2973	0.661294	6.49831	5.67026404417197e-08	1
x8_14_5b_cholenic_acid_3a_12a_diol_ba	acetoanaerobium	acetoanaerobium	83722	39682.5	2.10979	0.04047	1
x8_14_5b_cholenic_acid_3a_12a_diol_ba	acetoanaerobium	intest_surgery1	-3.2227	0.895006	-3.60076	0.000787656	1
x5b_cholenic_acid_7a_ol_3_one_ba	acetoanaerobium	(Intercept)	3.67161	0.291313	12.6037	2.30232778235728e-16	1
x5b_cholenic_acid_7a_ol_3_one_ba	acetoanaerobium	acetoanaerobium	3909.01	17480.9	0.223616	0.824068	1
x5b_cholenic_acid_7a_ol_3_one_ba	acetoanaerobium	intest_surgery1	-0.211348	0.394267	-0.536053	0.594562	1
x5a_cholanic_acid_3a_ol_6_one_ba	acetoanaerobium	(Intercept)	1.80273	1.13511	1.58815	0.119254	1
x5a_cholanic_acid_3a_ol_6_one_ba	acetoanaerobium	acetoanaerobium	-23509.1	68115	-0.345139	0.731598	1
x5a_cholanic_acid_3a_ol_6_one_ba	acetoanaerobium	intest_surgery1	-0.742276	1.53628	-0.483166	0.631321	1
x3a_hydroxy_12_ketolithocholic_acid_ba	acetoanaerobium	(Intercept)	2.62956	0.605858	4.34022	7.96423858781339e-05	1
x3a_hydroxy_12_ketolithocholic_acid_ba	acetoanaerobium	acetoanaerobium	-45190.3	36356	-1.243	0.220307	1
x3a_hydroxy_12_ketolithocholic_acid_ba	acetoanaerobium	intest_surgery1	1.96692	0.819978	2.39874	0.0206569	1
lithocholic_acid_ba	acetoanaerobium	(Intercept)	5.92749	0.43374	13.666	1.26336551039863e-17	1
lithocholic_acid_ba	acetoanaerobium	acetoanaerobium	58976	26027.6	2.2659	0.0283163	1
lithocholic_acid_ba	acetoanaerobium	intest_surgery1	-2.22461	0.587031	-3.78959	0.000445889	1
x5b_cholanic_acid_3b_12a_diol_ba	acetoanaerobium	(Intercept)	2.76033	0.336216	8.20997	1.70893644184043e-10	1
x5b_cholanic_acid_3b_12a_diol_ba	acetoanaerobium	acetoanaerobium	-1736.51	20175.5	-0.0860704	0.931792	1
x5b_cholanic_acid_3b_12a_diol_ba	acetoanaerobium	intest_surgery1	0.0789312	0.455041	0.17346	0.863068	1
chenodeoxycholic_acid_cdca_ba	acetoanaerobium	(Intercept)	3.43202	0.879178	3.90368	0.000314352	1
chenodeoxycholic_acid_cdca_ba	acetoanaerobium	acetoanaerobium	-20118.6	52757.2	-0.381344	0.704743	1
chenodeoxycholic_acid_cdca_ba	acetoanaerobium	intest_surgery1	2.40317	1.18989	2.01966	0.0493981	1
deoxycholic_acid_dca_ba	acetoanaerobium	(Intercept)	5.59796	0.891201	6.28137	1.19216731622351e-07	1
deoxycholic_acid_dca_ba	acetoanaerobium	acetoanaerobium	151686	53478.6	2.83638	0.00681562	1
deoxycholic_acid_dca_ba	acetoanaerobium	intest_surgery1	-4.98192	1.20617	-4.13038	0.000155098	1
hyodeoxycholic_acid_ba	acetoanaerobium	(Intercept)	4.53384	0.34816	13.0223	7.21346738394263e-17	1
hyodeoxycholic_acid_ba	acetoanaerobium	acetoanaerobium	15388.4	20892.2	0.736563	0.465211	1
hyodeoxycholic_acid_ba	acetoanaerobium	intest_surgery1	-0.474622	0.471205	-1.00725	0.3192	1
isodeoxycholic_acid_ba	acetoanaerobium	(Intercept)	-3.48857	0.781632	-4.46318	5.36213487454938e-05	1
isodeoxycholic_acid_ba	acetoanaerobium	acetoanaerobium	138722	46903.7	2.9576	0.00492585	1
isodeoxycholic_acid_ba	acetoanaerobium	intest_surgery1	-2.23624	1.05787	-2.11391	0.0400988	1
murocholic_acid_muro_ca_ba	acetoanaerobium	(Intercept)	2.03012	0.81008	2.50608	0.0158915	1
murocholic_acid_muro_ca_ba	acetoanaerobium	acetoanaerobium	-1520.59	48610.8	-0.0312809	0.975184	1
murocholic_acid_muro_ca_ba	acetoanaerobium	intest_surgery1	0.383773	1.09637	0.350038	0.727943	1
ursodeoxycholic_acid_udca_ba	acetoanaerobium	(Intercept)	3.54866	0.387786	9.15109	7.76282119552423e-12	1
ursodeoxycholic_acid_udca_ba	acetoanaerobium	acetoanaerobium	-8482.13	23270	-0.364509	0.717185	1
ursodeoxycholic_acid_udca_ba	acetoanaerobium	intest_surgery1	0.667803	0.524835	1.27241	0.209765	1
x3a_hydroxy_7_12_diketo_cholanic_acid_ba	acetoanaerobium	(Intercept)	-1.37511	0.453256	-3.03384	0.00400132	1
x3a_hydroxy_7_12_diketo_cholanic_acid_ba	acetoanaerobium	acetoanaerobium	-51488.8	27198.7	-1.89306	0.0647915	1
x3a_hydroxy_7_12_diketo_cholanic_acid_ba	acetoanaerobium	intest_surgery1	0.768163	0.613444	1.25221	0.216962	1
x5b_cholanic_acid_3a_6a_diol_7_one_ba	acetoanaerobium	(Intercept)	-1.47685	0.436228	-3.3855	0.00148289	1
x5b_cholanic_acid_3a_6a_diol_7_one_ba	acetoanaerobium	acetoanaerobium	-10469.4	26176.9	-0.399949	0.691087	1
x5b_cholanic_acid_3a_6a_diol_7_one_ba	acetoanaerobium	intest_surgery1	-0.31644	0.590398	-0.535977	0.594614	1
x3_dehydrocholic_acid_ba	acetoanaerobium	(Intercept)	0.776937	0.676931	1.14774	0.257143	1
x3_dehydrocholic_acid_ba	acetoanaerobium	acetoanaerobium	-49648.9	40620.8	-1.22225	0.227976	1
x3_dehydrocholic_acid_ba	acetoanaerobium	intest_surgery1	1.51418	0.916169	1.65273	0.105348	1
cholic_acid_ca_ba	acetoanaerobium	(Intercept)	4.20377	0.594418	7.07208	7.96779287524211e-09	1
cholic_acid_ca_ba	acetoanaerobium	acetoanaerobium	-48187.2	35669.4	-1.35094	0.183469	1
cholic_acid_ca_ba	acetoanaerobium	intest_surgery1	1.64137	0.804494	2.04025	0.0472195	1
hyocholic_acid_hca_ba	acetoanaerobium	(Intercept)	0.902072	0.259249	3.47955	0.0011272	1
hyocholic_acid_hca_ba	acetoanaerobium	acetoanaerobium	-11021.4	15556.9	-0.708457	0.482315	1
hyocholic_acid_hca_ba	acetoanaerobium	intest_surgery1	-0.0761202	0.350872	-0.216946	0.829231	1
glycoursocholanic_acid_ba	acetoanaerobium	(Intercept)	-5.31282	0.520685	-10.2035	2.7559064448353e-13	1
glycoursocholanic_acid_ba	acetoanaerobium	acetoanaerobium	-6477.82	31244.9	-0.207324	0.836692	1
glycoursocholanic_acid_ba	acetoanaerobium	intest_surgery1	0.840822	0.704703	1.19316	0.23906	1
glycolithocholic_acid_glca_ba	acetoanaerobium	(Intercept)	-2.2252	0.381725	-5.82931	5.59244953536867e-07	1
glycolithocholic_acid_glca_ba	acetoanaerobium	acetoanaerobium	27072.7	22906.3	1.18189	0.243459	1
glycolithocholic_acid_glca_ba	acetoanaerobium	intest_surgery1	-0.303123	0.516633	-0.586728	0.560318	1
glycoursodeoxycholic_acid_gudca_ba	acetoanaerobium	(Intercept)	-2.30363	0.725153	-3.17675	0.00269052	1
glycoursodeoxycholic_acid_gudca_ba	acetoanaerobium	acetoanaerobium	-77727	43514.5	-1.78623	0.0808006	1
glycoursodeoxycholic_acid_gudca_ba	acetoanaerobium	intest_surgery1	0.188451	0.981433	0.192017	0.848593	1
glycochenodeoxycholic_acid_gcdca_ba	acetoanaerobium	(Intercept)	1.23351	0.300791	4.10089	0.000170168	1
glycochenodeoxycholic_acid_gcdca_ba	acetoanaerobium	acetoanaerobium	119.365	18049.7	0.00661313	0.994753	1
glycochenodeoxycholic_acid_gcdca_ba	acetoanaerobium	intest_surgery1	0.490312	0.407095	1.20442	0.234725	1
glycodeoxycholic_acid_gdca_ba	acetoanaerobium	(Intercept)	-0.0165233	0.504621	-0.0327441	0.974023	1
glycodeoxycholic_acid_gdca_ba	acetoanaerobium	acetoanaerobium	65688	30281	2.16928	0.0353827	1
glycodeoxycholic_acid_gdca_ba	acetoanaerobium	intest_surgery1	-2.09352	0.682962	-3.06536	0.00366888	1
glycocholic_acid_gca_ba	acetoanaerobium	(Intercept)	0.463686	0.302632	1.53218	0.132479	1
glycocholic_acid_gca_ba	acetoanaerobium	acetoanaerobium	-15707.9	18160.1	-0.864966	0.391645	1
glycocholic_acid_gca_ba	acetoanaerobium	intest_surgery1	0.573029	0.409587	1.39904	0.168656	1
taurolithocholic_acid_tlca_ba	acetoanaerobium	(Intercept)	-1.78343	0.614082	-2.90422	0.00568812	1
taurolithocholic_acid_tlca_ba	acetoanaerobium	acetoanaerobium	49576.2	36849.4	1.34537	0.185245	1
taurolithocholic_acid_tlca_ba	acetoanaerobium	intest_surgery1	-1.95363	0.831108	-2.35064	0.0231839	1
taurochenodeoxycholic_acid_tcdca_ba	acetoanaerobium	(Intercept)	-0.0152955	0.43601	-0.0350806	0.972171	1
taurochenodeoxycholic_acid_tcdca_ba	acetoanaerobium	acetoanaerobium	-12682.2	26163.8	-0.484722	0.630224	1
taurochenodeoxycholic_acid_tcdca_ba	acetoanaerobium	intest_surgery1	0.243189	0.590103	0.412112	0.682214	1
taurodeoxycholic_acid_tdca_ba	acetoanaerobium	(Intercept)	-0.317826	0.561475	-0.566057	0.574168	1
taurodeoxycholic_acid_tdca_ba	acetoanaerobium	acetoanaerobium	47281.3	33692.6	1.40331	0.167386	1
taurodeoxycholic_acid_tdca_ba	acetoanaerobium	intest_surgery1	-2.64412	0.759909	-3.47952	0.00112731	1
tauro_w_muricholic_acid_tw_mca_ba	acetoanaerobium	(Intercept)	-2.40687	0.743519	-3.23713	0.00226895	1
tauro_w_muricholic_acid_tw_mca_ba	acetoanaerobium	acetoanaerobium	-63099.5	44616.6	-1.41426	0.164168	1
tauro_w_muricholic_acid_tw_mca_ba	acetoanaerobium	intest_surgery1	0.66041	1.00629	0.656282	0.514985	1
taurocholic_acid_tca_ba	acetoanaerobium	(Intercept)	0.605717	0.404076	1.49902	0.140852	1
taurocholic_acid_tca_ba	acetoanaerobium	acetoanaerobium	-15739.6	24247.6	-0.649119	0.519561	1
taurocholic_acid_tca_ba	acetoanaerobium	intest_surgery1	0.443901	0.546883	0.811692	0.421241	1
x2_hydroxybutyrate_p	acetobacter	(Intercept)	-3.91433	0.129331	-30.2659	1.47440602022564e-31	1
x2_hydroxybutyrate_p	acetobacter	acetobacter	495.336	2345.94	0.211146	0.833726	1
x2_hydroxybutyrate_p	acetobacter	intest_surgery1	-0.258056	0.145094	-1.77855	0.0820703	1
x3_hydroxybutyrate_p	acetobacter	(Intercept)	-3.99248	0.223342	-17.8761	4.5484766126351e-22	1
x3_hydroxybutyrate_p	acetobacter	acetobacter	6463.56	4051.2	1.59547	0.117608	1
x3_hydroxybutyrate_p	acetobacter	intest_surgery1	-0.191793	0.250563	-0.765447	0.448001	1
x3_hydroxyisovalerate_p	acetobacter	(Intercept)	-4.67606	0.0361686	-129.285	1.67805122592944e-59	1
x3_hydroxyisovalerate_p	acetobacter	acetobacter	-28.6039	656.062	-0.0435994	0.965417	1
x3_hydroxyisovalerate_p	acetobacter	intest_surgery1	0.0298264	0.0405768	0.735061	0.466116	1
acetate_p	acetobacter	(Intercept)	-2.92263	0.0667931	-43.7564	1.58904286345774e-38	1
acetate_p	acetobacter	acetobacter	-502.697	1211.56	-0.414917	0.680174	1
acetate_p	acetobacter	intest_surgery1	0.0862529	0.0749338	1.15106	0.255789	1
acetoacetate_p	acetobacter	(Intercept)	-4.29984	0.120178	-35.779	1.06291219573388e-34	1
acetoacetate_p	acetobacter	acetobacter	4762.45	2179.9	2.18471	0.034159	1
acetoacetate_p	acetobacter	intest_surgery1	-0.0293354	0.134825	-0.217582	0.828739	1
alanine_p	acetobacter	(Intercept)	-1.33094	0.0702345	-18.9499	4.45340095901191e-23	1
alanine_p	acetobacter	acetobacter	-2231.18	1273.98	-1.75134	0.086701	1
alanine_p	acetobacter	intest_surgery1	0.167184	0.0787946	2.12177	0.0393968	1
citrate_p	acetobacter	(Intercept)	-2.49067	0.0698375	-35.6638	1.22305806734868e-34	1
citrate_p	acetobacter	acetobacter	-95.305	1266.78	-0.075234	0.940362	1
citrate_p	acetobacter	intest_surgery1	-0.0422715	0.0783492	-0.539527	0.592183	1
creatinine_p	acetobacter	(Intercept)	-3.86779	0.0846111	-45.7126	2.31649097639612e-39	1
creatinine_p	acetobacter	acetobacter	1134.51	1534.76	0.73921	0.463618	1
creatinine_p	acetobacter	intest_surgery1	-0.110353	0.0949234	-1.16255	0.25114	1
formate_p	acetobacter	(Intercept)	-2.88891	0.0731198	-39.5092	1.40269425652335e-36	1
formate_p	acetobacter	acetobacter	-157.134	1326.32	-0.118473	0.90622	1
formate_p	acetobacter	intest_surgery1	0.0737688	0.0820316	0.899273	0.373294	1
glucose_p	acetobacter	(Intercept)	1.11102	0.0451976	24.5815	1.01357753146506e-27	1
glucose_p	acetobacter	acetobacter	686.258	819.84	0.837063	0.406981	1
glucose_p	acetobacter	intest_surgery1	-0.0120789	0.0507063	-0.238213	0.812797	1
glutamine_p	acetobacter	(Intercept)	-1.05772	0.0455449	-23.2236	1.0887675809438e-26	1
glutamine_p	acetobacter	acetobacter	-659.293	826.138	-0.798042	0.429037	1
glutamine_p	acetobacter	intest_surgery1	0.116702	0.0510958	2.28399	0.0271424	1
glycine_p	acetobacter	(Intercept)	-1.75857	0.0856147	-20.5406	1.71152520540836e-24	1
glycine_p	acetobacter	acetobacter	-552.618	1552.97	-0.355847	0.723618	1
glycine_p	acetobacter	intest_surgery1	0.182613	0.0960494	1.90124	0.0636855	1
histidine_p	acetobacter	(Intercept)	-2.85151	0.0646877	-44.0812	1.14771267673521e-38	1
histidine_p	acetobacter	acetobacter	-1580.5	1173.37	-1.34698	0.184733	1
histidine_p	acetobacter	intest_surgery1	0.0407846	0.0725717	0.56199	0.576911	1
isoleucine_p	acetobacter	(Intercept)	-3.40256	0.0722154	-47.1168	6.10080858966377e-40	1
isoleucine_p	acetobacter	acetobacter	-409.446	1309.92	-0.312574	0.756048	1
isoleucine_p	acetobacter	intest_surgery1	0.0119401	0.081017	0.147377	0.883492	1
isopropanol_p	acetobacter	(Intercept)	-5.18918	0.400365	-12.9611	8.53446751906491e-17	1
isopropanol_p	acetobacter	acetobacter	3083.28	7262.22	0.424564	0.673177	1
isopropanol_p	acetobacter	intest_surgery1	-0.173304	0.449161	-0.385839	0.701434	1
lactate_p	acetobacter	(Intercept)	0.0480855	0.0805838	0.596714	0.553688	1
lactate_p	acetobacter	acetobacter	-4186.13	1461.71	-2.86386	0.00633604	1
lactate_p	acetobacter	intest_surgery1	0.00749049	0.0904053	0.0828545	0.934335	1
leucine_p	acetobacter	(Intercept)	-2.83876	0.0715401	-39.6807	1.16049238432192e-36	1
leucine_p	acetobacter	acetobacter	-431.809	1297.67	-0.332759	0.740862	1
leucine_p	acetobacter	intest_surgery1	0.0191063	0.0802593	0.238058	0.812917	1
lysine_p	acetobacter	(Intercept)	-2.45498	0.06434	-38.1564	6.43502851652018e-36	1
lysine_p	acetobacter	acetobacter	-823.687	1167.06	-0.705777	0.483965	1
lysine_p	acetobacter	intest_surgery1	0.0275477	0.0721817	0.381643	0.704522	1
phenylalanine_p	acetobacter	(Intercept)	-3.27839	0.0529858	-61.873	3.47438817977098e-45	1
phenylalanine_p	acetobacter	acetobacter	-904.165	961.109	-0.940752	0.351855	1
phenylalanine_p	acetobacter	intest_surgery1	-0.0687666	0.0594436	-1.15684	0.253443	1
pyruvate_p	acetobacter	(Intercept)	-3.09512	0.101678	-30.4403	1.15199541827214e-31	1
pyruvate_p	acetobacter	acetobacter	-2924.13	1844.34	-1.58546	0.119865	1
pyruvate_p	acetobacter	intest_surgery1	-0.0106457	0.114071	-0.0933252	0.926059	1
tryptophan_p	acetobacter	(Intercept)	-3.50069	0.0766589	-45.6659	2.42323540473992e-39	1
tryptophan_p	acetobacter	acetobacter	248.119	1390.52	0.178437	0.859181	1
tryptophan_p	acetobacter	intest_surgery1	-0.0364701	0.086002	-0.424062	0.673541	1
tyrosine_p	acetobacter	(Intercept)	-3.21505	0.0706999	-45.4746	2.91555179625987e-39	1
tyrosine_p	acetobacter	acetobacter	771.476	1282.43	0.601576	0.550476	1
tyrosine_p	acetobacter	intest_surgery1	-0.0213274	0.0793168	-0.268889	0.789244	1
valine_p	acetobacter	(Intercept)	-1.97885	0.0594705	-33.2745	2.47838937825653e-33	1
valine_p	acetobacter	acetobacter	-228.438	1078.73	-0.211764	0.833247	1
valine_p	acetobacter	intest_surgery1	-0.0696084	0.0667187	-1.04331	0.302376	1
acetate_s	acetobacter	(Intercept)	4.15839	0.0780726	53.2631	2.69462038506704e-42	1
acetate_s	acetobacter	acetobacter	4077.05	1416.16	2.87895	0.00608615	1
acetate_s	acetobacter	intest_surgery1	-0.113686	0.087588	-1.29796	0.200915	1
alanine_s	acetobacter	(Intercept)	1.20487	0.135726	8.87719	1.89059941771462e-11	1
alanine_s	acetobacter	acetobacter	-1768.95	2461.94	-0.718519	0.476152	1
alanine_s	acetobacter	intest_surgery1	0.193006	0.152268	1.26754	0.211482	1
aspartate_s	acetobacter	(Intercept)	0.575002	0.139723	4.1153	0.000162635	1
aspartate_s	acetobacter	acetobacter	1157.16	2534.43	0.456576	0.650172	1
aspartate_s	acetobacter	intest_surgery1	-0.318478	0.156752	-2.03173	0.0481109	1
butyrate_s	acetobacter	(Intercept)	2.27324	0.171333	13.268	3.68734371720482e-17	0.848341
butyrate_s	acetobacter	acetobacter	10787	3107.8	3.47094	0.00115604	0.848341
butyrate_s	acetobacter	intest_surgery1	-0.326913	0.192215	-1.70077	0.0958873	0.848341
formate_s	acetobacter	(Intercept)	-1.12508	0.206707	-5.44287	2.07897079144436e-06	1
formate_s	acetobacter	acetobacter	-3257.17	3749.45	-0.868704	0.389618	1
formate_s	acetobacter	intest_surgery1	0.1167	0.2319	0.503235	0.617254	1
glucose_s	acetobacter	(Intercept)	2.08793	0.195174	10.6978	6.02640772129009e-14	1
glucose_s	acetobacter	acetobacter	-1515.67	3540.26	-0.428125	0.670602	1
glucose_s	acetobacter	intest_surgery1	0.101185	0.218962	0.462113	0.646227	1
glutamate_s	acetobacter	(Intercept)	1.17823	0.167343	7.04082	8.86436913672668e-09	1
glutamate_s	acetobacter	acetobacter	5903.22	3035.44	1.94477	0.0580682	1
glutamate_s	acetobacter	intest_surgery1	-0.272527	0.187739	-1.45163	0.153541	1
glutamine_s	acetobacter	(Intercept)	0.43514	0.1372	3.17156	0.00273002	1
glutamine_s	acetobacter	acetobacter	3570.94	2488.68	1.43488	0.158237	1
glutamine_s	acetobacter	intest_surgery1	-0.284707	0.153922	-1.84968	0.0709331	1
histidine_s	acetobacter	(Intercept)	-0.509279	0.17613	-2.8915	0.0058854	1
histidine_s	acetobacter	acetobacter	-560.419	3194.82	-0.175415	0.861541	1
histidine_s	acetobacter	intest_surgery1	0.0937983	0.197597	0.474696	0.637299	1
isoleucine_s	acetobacter	(Intercept)	0.656273	0.126714	5.17917	5.05448628740309e-06	1
isoleucine_s	acetobacter	acetobacter	2950.56	2298.47	1.28371	0.205815	1
isoleucine_s	acetobacter	intest_surgery1	-0.0710457	0.142158	-0.499767	0.619674	1
lactate_s	acetobacter	(Intercept)	0.627638	0.174402	3.59881	0.000792232	1
lactate_s	acetobacter	acetobacter	2971.14	3163.47	0.939204	0.35264	1
lactate_s	acetobacter	intest_surgery1	-0.00601125	0.195657	-0.0307233	0.975626	1
leucine_s	acetobacter	(Intercept)	0.97645	0.148821	6.56124	4.57080499483984e-08	1
leucine_s	acetobacter	acetobacter	3025.73	2699.46	1.12087	0.268291	1
leucine_s	acetobacter	intest_surgery1	-0.0101136	0.166959	-0.0605753	0.951966	1
methylamine_s	acetobacter	(Intercept)	-1.47749	0.287104	-5.14618	5.64550664571764e-06	1
methylamine_s	acetobacter	acetobacter	5911	5207.77	1.13503	0.262371	1
methylamine_s	acetobacter	intest_surgery1	-0.856253	0.322096	-2.65838	0.0108334	1
phenylalanine_s	acetobacter	(Intercept)	0.502767	0.140104	3.58853	0.000816859	1
phenylalanine_s	acetobacter	acetobacter	597.602	2541.35	0.235152	0.815158	1
phenylalanine_s	acetobacter	intest_surgery1	0.0957099	0.15718	0.60892	0.545639	1
propionate_s	acetobacter	(Intercept)	3.03098	0.105566	28.7118	1.40983088140355e-30	1
propionate_s	acetobacter	acetobacter	2298.05	1914.85	1.20012	0.236374	1
propionate_s	acetobacter	intest_surgery1	-0.0144634	0.118432	-0.122124	0.903344	1
succinate_s	acetobacter	(Intercept)	0.642965	0.598298	1.07466	0.288257	1
succinate_s	acetobacter	acetobacter	-22533.2	10852.5	-2.07631	0.0436062	1
succinate_s	acetobacter	intest_surgery1	0.655438	0.671218	0.976491	0.334042	1
trimethylamine_s	acetobacter	(Intercept)	-1.80827	0.188102	-9.61322	1.76300248488668e-12	1
trimethylamine_s	acetobacter	acetobacter	178.558	3411.98	0.0523327	0.958495	1
trimethylamine_s	acetobacter	intest_surgery1	0.104462	0.211028	0.495014	0.622999	1
tyrosine_s	acetobacter	(Intercept)	0.492261	0.123712	3.97908	0.000248942	1
tyrosine_s	acetobacter	acetobacter	3152.99	2244.02	1.40506	0.166868	1
tyrosine_s	acetobacter	intest_surgery1	-0.0160169	0.13879	-0.115404	0.908638	1
valine_s	acetobacter	(Intercept)	1.15255	0.161458	7.13837	6.35558861490594e-09	1
valine_s	acetobacter	acetobacter	2432.39	2928.68	0.830539	0.410619	1
valine_s	acetobacter	intest_surgery1	-0.0153579	0.181136	-0.0847862	0.932807	1
lithocholenic_acid_ba	acetobacter	(Intercept)	2.80742	0.570973	4.9169	1.21250981969246e-05	1
lithocholenic_acid_ba	acetobacter	acetobacter	19057.2	10356.9	1.84005	0.0723621	1
lithocholenic_acid_ba	acetobacter	intest_surgery1	-1.72538	0.640563	-2.69354	0.0098987	1
isolithocholic_acid_ba	acetobacter	(Intercept)	5.75056	0.507202	11.3378	8.81820230268732e-15	1
isolithocholic_acid_ba	acetobacter	acetobacter	17076.8	9200.14	1.85615	0.0699877	1
isolithocholic_acid_ba	acetobacter	intest_surgery1	-1.78819	0.569019	-3.14258	0.00296086	1
allolithocholic_acid_ba	acetobacter	(Intercept)	0.810299	0.483373	1.67634	0.100607	1
allolithocholic_acid_ba	acetobacter	acetobacter	22653.2	8767.91	2.58364	0.013095	1
allolithocholic_acid_ba	acetobacter	intest_surgery1	-1.25311	0.542287	-2.31078	0.0254837	1
x3a_12a_23_nordeoxycholic_acid_ba	acetobacter	(Intercept)	-3.21994	0.581522	-5.53709	1.51099335257259e-06	1
x3a_12a_23_nordeoxycholic_acid_ba	acetobacter	acetobacter	3932.05	10548.2	0.372768	0.711071	1
x3a_12a_23_nordeoxycholic_acid_ba	acetobacter	intest_surgery1	-0.126479	0.652398	-0.193867	0.847152	1
x3_6_diketocholanic_acid_ba	acetobacter	(Intercept)	2.03194	0.483908	4.19903	0.00012487	1
x3_6_diketocholanic_acid_ba	acetobacter	acetobacter	15346.6	8777.61	1.74838	0.0872179	1
x3_6_diketocholanic_acid_ba	acetobacter	intest_surgery1	-0.589908	0.542887	-1.08661	0.282994	1
x8_14_5b_cholenic_acid_3a_12a_diol_ba	acetobacter	(Intercept)	4.02584	0.771489	5.21827	4.43278761691864e-06	1
x8_14_5b_cholenic_acid_3a_12a_diol_ba	acetobacter	acetobacter	26234.1	13994	1.87466	0.0673386	1
x8_14_5b_cholenic_acid_3a_12a_diol_ba	acetobacter	intest_surgery1	-2.61905	0.865517	-3.026	0.00408829	1
x5b_cholenic_acid_7a_ol_3_one_ba	acetobacter	(Intercept)	3.69712	0.336805	10.977	2.58859502543454e-14	1
x5b_cholenic_acid_7a_ol_3_one_ba	acetobacter	acetobacter	161.093	6109.31	0.0263684	0.97908	1
x5b_cholenic_acid_7a_ol_3_one_ba	acetobacter	intest_surgery1	-0.185492	0.377855	-0.490908	0.625877	1
x5a_cholanic_acid_3a_ol_6_one_ba	acetobacter	(Intercept)	1.15272	1.30913	0.880525	0.383254	1
x5a_cholanic_acid_3a_ol_6_one_ba	acetobacter	acetobacter	12867.4	23746.2	0.541871	0.590581	1
x5a_cholanic_acid_3a_ol_6_one_ba	acetobacter	intest_surgery1	-0.867491	1.46868	-0.59066	0.557704	1
x3a_hydroxy_12_ketolithocholic_acid_ba	acetobacter	(Intercept)	3.87065	0.610133	6.34395	9.62169084000949e-08	0.371019
x3a_hydroxy_12_ketolithocholic_acid_ba	acetobacter	acetobacter	-44656.5	11067.2	-4.03504	0.000209139	0.371019
x3a_hydroxy_12_ketolithocholic_acid_ba	acetobacter	intest_surgery1	1.57434	0.684495	2.3	0.0261404	0.371019
lithocholic_acid_ba	acetobacter	(Intercept)	5.78222	0.509786	11.3424	8.69791380010524e-15	1
lithocholic_acid_ba	acetobacter	acetobacter	17199.8	9247.01	1.86004	0.069423	1
lithocholic_acid_ba	acetobacter	intest_surgery1	-1.80218	0.571918	-3.15112	0.00289096	1
x5b_cholanic_acid_3b_12a_diol_ba	acetobacter	(Intercept)	2.78561	0.388437	7.17133	5.68052650419688e-09	1
x5b_cholanic_acid_3b_12a_diol_ba	acetobacter	acetobacter	-1091.62	7045.85	-0.154931	0.877568	1
x5b_cholanic_acid_3b_12a_diol_ba	acetobacter	intest_surgery1	0.0652123	0.435779	0.149645	0.881713	1
chenodeoxycholic_acid_cdca_ba	acetobacter	(Intercept)	4.37512	0.985651	4.43881	5.8010824878218e-05	1
chenodeoxycholic_acid_cdca_ba	acetobacter	acetobacter	-30762.6	17878.7	-1.72063	0.0921886	1
chenodeoxycholic_acid_cdca_ba	acetobacter	intest_surgery1	2.20458	1.10578	1.99369	0.0522685	1
deoxycholic_acid_dca_ba	acetobacter	(Intercept)	5.93505	1.0999	5.396	2.43591950849846e-06	1
deoxycholic_acid_dca_ba	acetobacter	acetobacter	24435.9	19951.1	1.22479	0.227026	1
deoxycholic_acid_dca_ba	acetobacter	intest_surgery1	-3.9388	1.23395	-3.19202	0.00257744	1
hyodeoxycholic_acid_ba	acetobacter	(Intercept)	4.52001	0.40351	11.2017	1.32102317287637e-14	1
hyodeoxycholic_acid_ba	acetobacter	acetobacter	3816.96	7319.27	0.521495	0.604579	1
hyodeoxycholic_acid_ba	acetobacter	intest_surgery1	-0.365869	0.45269	-0.808212	0.423221	1
isodeoxycholic_acid_ba	acetobacter	(Intercept)	-3.54353	0.950339	-3.7287	0.000536408	1
isodeoxycholic_acid_ba	acetobacter	acetobacter	32468	17238.2	1.88349	0.0661056	1
isodeoxycholic_acid_ba	acetobacter	intest_surgery1	-1.26012	1.06617	-1.18191	0.243448	1
murocholic_acid_muro_ca_ba	acetobacter	(Intercept)	2.01275	0.936082	2.15018	0.0369508	1
murocholic_acid_muro_ca_ba	acetobacter	acetobacter	144.921	16979.6	0.00853502	0.993228	1
murocholic_acid_muro_ca_ba	acetobacter	intest_surgery1	0.374169	1.05017	0.356294	0.723286	1
ursodeoxycholic_acid_udca_ba	acetobacter	(Intercept)	3.91088	0.43782	8.93263	1.57779420119743e-11	1
ursodeoxycholic_acid_udca_ba	acetobacter	acetobacter	-11983.6	7941.61	-1.50896	0.138299	1
ursodeoxycholic_acid_udca_ba	acetobacter	intest_surgery1	0.586234	0.491181	1.19352	0.23892	1
x3a_hydroxy_7_12_diketo_cholanic_acid_ba	acetobacter	(Intercept)	-1.27232	0.531282	-2.39482	0.0208535	1
x3a_hydroxy_7_12_diketo_cholanic_acid_ba	acetobacter	acetobacter	-14346.3	9636.92	-1.48868	0.143546	1
x3a_hydroxy_7_12_diketo_cholanic_acid_ba	acetobacter	intest_surgery1	0.400835	0.596034	0.672503	0.504702	1
x5b_cholanic_acid_3a_6a_diol_7_one_ba	acetobacter	(Intercept)	-2.21363	0.482328	-4.58948	3.55927392325064e-05	1
x5b_cholanic_acid_3a_6a_diol_7_one_ba	acetobacter	acetobacter	18193	8748.94	2.07945	0.0433036	1
x5b_cholanic_acid_3a_6a_diol_7_one_ba	acetobacter	intest_surgery1	-0.344923	0.541113	-0.637432	0.527074	1
x3_dehydrocholic_acid_ba	acetobacter	(Intercept)	1.951	0.709012	2.75172	0.00851369	0.92657
x3_dehydrocholic_acid_ba	acetobacter	acetobacter	-43783.4	12860.8	-3.40441	0.00140372	0.92657
x3_dehydrocholic_acid_ba	acetobacter	intest_surgery1	1.09442	0.795426	1.37589	0.175665	0.92657
cholic_acid_ca_ba	acetobacter	(Intercept)	5.09983	0.636227	8.01573	3.27015201776718e-10	1
cholic_acid_ca_ba	acetobacter	acetobacter	-35711.8	11540.5	-3.09447	0.00338509	1
cholic_acid_ca_ba	acetobacter	intest_surgery1	1.24882	0.71377	1.74961	0.0870033	1
hyocholic_acid_hca_ba	acetobacter	(Intercept)	0.915909	0.300329	3.04969	0.0038308	1
hyocholic_acid_hca_ba	acetobacter	acetobacter	-2843.41	5447.66	-0.52195	0.604265	1
hyocholic_acid_hca_ba	acetobacter	intest_surgery1	-0.15425	0.336933	-0.457807	0.649294	1
glycoursocholanic_acid_ba	acetobacter	(Intercept)	-5.03999	0.597346	-8.43731	8.03101284286203e-11	1
glycoursocholanic_acid_ba	acetobacter	acetobacter	-9045.98	10835.3	-0.834865	0.408204	1
glycoursocholanic_acid_ba	acetobacter	intest_surgery1	0.778759	0.67015	1.16207	0.251335	1
glycolithocholic_acid_glca_ba	acetobacter	(Intercept)	-2.23543	0.444865	-5.02496	8.46506387214615e-06	1
glycolithocholic_acid_glca_ba	acetobacter	acetobacter	6322.65	8069.4	0.783533	0.437419	1
glycolithocholic_acid_glca_ba	acetobacter	intest_surgery1	-0.112655	0.499085	-0.225723	0.822439	1
glycoursodeoxycholic_acid_gudca_ba	acetobacter	(Intercept)	-1.67197	0.81823	-2.0434	0.0468942	1
glycoursodeoxycholic_acid_gudca_ba	acetobacter	acetobacter	-34932.9	14841.9	-2.35367	0.0230165	1
glycoursodeoxycholic_acid_gudca_ba	acetobacter	intest_surgery1	-0.395122	0.917956	-0.430437	0.668932	1
glycochenodeoxycholic_acid_gcdca_ba	acetobacter	(Intercept)	1.47973	0.343007	4.31399	8.66158202887527e-05	1
glycochenodeoxycholic_acid_gcdca_ba	acetobacter	acetobacter	-6833.25	6221.79	-1.09828	0.277925	1
glycochenodeoxycholic_acid_gcdca_ba	acetobacter	intest_surgery1	0.476134	0.384812	1.23732	0.222388	1
glycodeoxycholic_acid_gdca_ba	acetobacter	(Intercept)	-0.0492614	0.599343	-0.0821924	0.934858	1
glycodeoxycholic_acid_gdca_ba	acetobacter	acetobacter	15561.3	10871.5	1.43139	0.159228	1
glycodeoxycholic_acid_gdca_ba	acetobacter	intest_surgery1	-1.6309	0.672391	-2.42552	0.0193605	1
glycocholic_acid_gca_ba	acetobacter	(Intercept)	0.626701	0.346341	1.80949	0.0770573	1
glycocholic_acid_gca_ba	acetobacter	acetobacter	-8044.89	6282.29	-1.28057	0.206907	1
glycocholic_acid_gca_ba	acetobacter	intest_surgery1	0.452937	0.388553	1.1657	0.249877	1
taurolithocholic_acid_tlca_ba	acetobacter	(Intercept)	-1.00214	0.718347	-1.39506	0.169845	1
taurolithocholic_acid_tlca_ba	acetobacter	acetobacter	-10711.7	13030.1	-0.822078	0.415367	1
taurolithocholic_acid_tlca_ba	acetobacter	intest_surgery1	-1.65363	0.805898	-2.05191	0.0460238	1
taurochenodeoxycholic_acid_tcdca_ba	acetobacter	(Intercept)	0.154922	0.501291	0.309045	0.758713	1
taurochenodeoxycholic_acid_tcdca_ba	acetobacter	acetobacter	-7570.76	9092.91	-0.832601	0.409467	1
taurochenodeoxycholic_acid_tcdca_ba	acetobacter	intest_surgery1	0.143875	0.562387	0.25583	0.799248	1
taurodeoxycholic_acid_tdca_ba	acetobacter	(Intercept)	0.281557	0.660913	0.426012	0.67213	1
taurodeoxycholic_acid_tdca_ba	acetobacter	acetobacter	-6155.37	11988.3	-0.513448	0.61015	1
taurodeoxycholic_acid_tdca_ba	acetobacter	intest_surgery1	-2.34912	0.741464	-3.16821	0.00275578	1
tauro_w_muricholic_acid_tw_mca_ba	acetobacter	(Intercept)	-1.47804	0.814351	-1.81499	0.0761935	1
tauro_w_muricholic_acid_tw_mca_ba	acetobacter	acetobacter	-39950.4	14771.5	-2.70456	0.00962147	1
tauro_w_muricholic_acid_tw_mca_ba	acetobacter	intest_surgery1	0.161288	0.913603	0.17654	0.860662	1
taurocholic_acid_tca_ba	acetobacter	(Intercept)	1.13314	0.444606	2.54864	0.014296	1
taurocholic_acid_tca_ba	acetobacter	acetobacter	-18204.8	8064.7	-2.25735	0.0288868	1
taurocholic_acid_tca_ba	acetobacter	intest_surgery1	0.301364	0.498794	0.604186	0.548754	1
x2_hydroxybutyrate_p	acetobacterium	(Intercept)	-3.93267	0.130767	-30.0738	1.93792790711169e-31	1
x2_hydroxybutyrate_p	acetobacterium	acetobacterium	1878.42	4501.05	0.417329	0.678422	1
x2_hydroxybutyrate_p	acetobacterium	intest_surgery1	-0.258005	0.144821	-1.78155	0.0815723	1
x3_hydroxybutyrate_p	acetobacterium	(Intercept)	-3.99363	0.226447	-17.6361	7.7576877664496e-22	1
x3_hydroxybutyrate_p	acetobacterium	acetobacterium	12124.4	7794.36	1.55553	0.126825	1
x3_hydroxybutyrate_p	acetobacterium	intest_surgery1	-0.198609	0.250782	-0.791959	0.43254	1
x3_hydroxyisovalerate_p	acetobacterium	(Intercept)	-4.67089	0.0365969	-127.631	2.99124932335585e-59	1
x3_hydroxyisovalerate_p	acetobacterium	acetobacterium	-322.495	1259.68	-0.256014	0.799106	1
x3_hydroxyisovalerate_p	acetobacterium	intest_surgery1	0.029694	0.0405299	0.732645	0.467574	1
acetate_p	acetobacterium	(Intercept)	-2.99175	0.0667775	-44.8017	5.62203282601769e-39	1
acetate_p	acetobacterium	acetobacterium	2656.19	2298.5	1.15562	0.253935	1
acetate_p	acetobacterium	intest_surgery1	0.0889594	0.0739539	1.2029	0.235304	1
acetoacetate_p	acetobacterium	(Intercept)	-4.26894	0.12403	-34.4186	5.72752834930917e-34	1
acetoacetate_p	acetobacterium	acetobacterium	7282.53	4269.15	1.70585	0.0949303	1
acetoacetate_p	acetobacterium	intest_surgery1	-0.0353561	0.137359	-0.257399	0.798044	1
alanine_p	acetobacterium	(Intercept)	-1.37908	0.0731473	-18.8535	5.46398639470329e-23	1
alanine_p	acetobacterium	acetobacterium	-1661.1	2517.75	-0.659756	0.512773	1
alanine_p	acetobacterium	intest_surgery1	0.171064	0.0810082	2.11168	0.040299	1
citrate_p	acetobacterium	(Intercept)	-2.53201	0.0702014	-36.0678	7.49204933571239e-35	1
citrate_p	acetobacterium	acetobacterium	1971.88	2416.35	0.816057	0.418766	1
citrate_p	acetobacterium	intest_surgery1	-0.0408705	0.0777457	-0.525695	0.601681	1
creatinine_p	acetobacterium	(Intercept)	-3.84825	0.0860602	-44.7157	6.11823798516808e-39	1
creatinine_p	acetobacterium	acetobacterium	1101.16	2962.22	0.371734	0.711835	1
creatinine_p	acetobacterium	intest_surgery1	-0.112171	0.0953088	-1.17692	0.245416	1
formate_p	acetobacterium	(Intercept)	-2.95578	0.0727538	-40.6272	4.13236226278912e-37	1
formate_p	acetobacterium	acetobacterium	3184.57	2504.21	1.27169	0.210017	1
formate_p	acetobacterium	intest_surgery1	0.0760384	0.0805724	0.943727	0.350349	1
glucose_p	acetobacterium	(Intercept)	1.1043	0.0455764	24.2298	1.85411359955315e-27	1
glucose_p	acetobacterium	acetobacterium	1630.41	1568.75	1.0393	0.304216	1
glucose_p	acetobacterium	intest_surgery1	-0.0125952	0.0504743	-0.249536	0.804082	1
glutamine_p	acetobacterium	(Intercept)	-1.06206	0.0462377	-22.9695	1.72001686872182e-26	1
glutamine_p	acetobacterium	acetobacterium	-1004.76	1591.51	-0.631325	0.531022	1
glutamine_p	acetobacterium	intest_surgery1	0.117538	0.0512067	2.29536	0.026427	1
glycine_p	acetobacterium	(Intercept)	-1.73188	0.0861769	-20.0968	4.16042680822967e-24	1
glycine_p	acetobacterium	acetobacterium	-2419.67	2966.23	-0.815737	0.418947	1
glycine_p	acetobacterium	intest_surgery1	0.18236	0.0954381	1.91076	0.0624187	1
histidine_p	acetobacterium	(Intercept)	-2.88277	0.0665607	-43.3104	2.49353051272448e-38	1
histidine_p	acetobacterium	acetobacterium	-1324.37	2291.04	-0.578065	0.566102	1
histidine_p	acetobacterium	intest_surgery1	0.0434433	0.0737138	0.589351	0.558573	1
isoleucine_p	acetobacterium	(Intercept)	-3.44027	0.0730179	-47.1154	6.10841338798373e-40	1
isoleucine_p	acetobacterium	acetobacterium	1196.89	2513.3	0.476223	0.63622	1
isoleucine_p	acetobacterium	intest_surgery1	0.01356	0.0808649	0.167687	0.867581	1
isopropanol_p	acetobacterium	(Intercept)	-5.09498	0.406187	-12.5434	2.72578301400977e-16	1
isopropanol_p	acetobacterium	acetobacterium	855.989	13981.1	0.0612249	0.951451	1
isopropanol_p	acetobacterium	intest_surgery1	-0.179535	0.449839	-0.39911	0.6917	1
lactate_p	acetobacterium	(Intercept)	-0.0159969	0.0865719	-0.184781	0.854231	1
lactate_p	acetobacterium	acetobacterium	-4481.08	2979.83	-1.50381	0.139618	1
lactate_p	acetobacterium	intest_surgery1	0.0139437	0.0958755	0.145436	0.885016	1
leucine_p	acetobacterium	(Intercept)	-2.89255	0.072013	-40.167	6.80730751310122e-37	1
leucine_p	acetobacterium	acetobacterium	1991.22	2478.71	0.803329	0.426008	1
leucine_p	acetobacterium	intest_surgery1	0.0212556	0.079752	0.266521	0.791056	1
lysine_p	acetobacterium	(Intercept)	-2.46851	0.065408	-37.7403	1.03871252480469e-35	1
lysine_p	acetobacterium	acetobacterium	-833.775	2251.36	-0.370342	0.712865	1
lysine_p	acetobacterium	intest_surgery1	0.0288464	0.0724372	0.398227	0.692346	1
phenylalanine_p	acetobacterium	(Intercept)	-3.26745	0.0532872	-61.3177	5.18873262810871e-45	1
phenylalanine_p	acetobacterium	acetobacterium	-2256.8	1834.16	-1.23043	0.22493	1
phenylalanine_p	acetobacterium	intest_surgery1	-0.0681522	0.0590138	-1.15485	0.254247	1
pyruvate_p	acetobacterium	(Intercept)	-3.07776	0.102142	-30.1323	1.7829195202283e-31	1
pyruvate_p	acetobacterium	acetobacterium	-6361.1	3515.74	-1.80932	0.0770844	1
pyruvate_p	acetobacterium	intest_surgery1	-0.00809158	0.113119	-0.0715319	0.943291	1
tryptophan_p	acetobacterium	(Intercept)	-3.48235	0.0776199	-44.8642	5.28767032235257e-39	1
tryptophan_p	acetobacterium	acetobacterium	-490.85	2671.7	-0.183722	0.855057	1
tryptophan_p	acetobacterium	intest_surgery1	-0.03731	0.0859615	-0.434032	0.666339	1
tyrosine_p	acetobacterium	(Intercept)	-3.21879	0.0715256	-45.002	4.6195292110499e-39	1
tyrosine_p	acetobacterium	acetobacterium	1634.56	2461.93	0.663935	0.51012	1
tyrosine_p	acetobacterium	intest_surgery1	-0.0220277	0.0792122	-0.278085	0.782221	1
valine_p	acetobacterium	(Intercept)	-1.99417	0.0602259	-33.1115	3.06497593493044e-33	1
valine_p	acetobacterium	acetobacterium	370.471	2072.99	0.178713	0.858965	1
valine_p	acetobacterium	intest_surgery1	-0.0688844	0.0666982	-1.03278	0.307227	1
acetate_s	acetobacterium	(Intercept)	4.11484	0.0746415	55.1281	5.85943588859259e-43	0.482666
acetate_s	acetobacterium	acetobacterium	9874.99	2569.18	3.84363	0.000378041	0.482666
acetate_s	acetobacterium	intest_surgery1	-0.116639	0.082663	-1.41101	0.165117	0.482666
alanine_s	acetobacterium	(Intercept)	1.29628	0.133741	9.69245	1.37088102807714e-12	1
alanine_s	acetobacterium	acetobacterium	-8055.71	4603.4	-1.74995	0.0869441	1
alanine_s	acetobacterium	intest_surgery1	0.192007	0.148114	1.29635	0.201464	1
aspartate_s	acetobacterium	(Intercept)	0.625793	0.14179	4.41353	6.2934903250575e-05	1
aspartate_s	acetobacterium	acetobacterium	-481.474	4880.43	-0.0986539	0.921851	1
aspartate_s	acetobacterium	intest_surgery1	-0.321302	0.157027	-2.04615	0.046611	1
butyrate_s	acetobacterium	(Intercept)	2.22371	0.16876	13.1767	4.72693475274192e-17	0.436917
butyrate_s	acetobacterium	acetobacterium	22710.6	5808.78	3.9097	0.000308563	0.436917
butyrate_s	acetobacterium	intest_surgery1	-0.336792	0.186897	-1.80202	0.0782427	0.436917
formate_s	acetobacterium	(Intercept)	-1.04033	0.206105	-5.04756	7.8506324077853e-06	1
formate_s	acetobacterium	acetobacterium	-10487.3	7094.19	-1.4783	0.146295	1
formate_s	acetobacterium	intest_surgery1	0.117488	0.228254	0.514725	0.609264	1
glucose_s	acetobacterium	(Intercept)	2.02404	0.198015	10.2216	2.60511466864687e-13	1
glucose_s	acetobacterium	acetobacterium	493.195	6815.75	0.0723611	0.942635	1
glucose_s	acetobacterium	intest_surgery1	0.104801	0.219296	0.477897	0.635037	1
glutamate_s	acetobacterium	(Intercept)	1.28888	0.174942	7.36746	2.91488705058645e-09	1
glutamate_s	acetobacterium	acetobacterium	5264.75	6021.55	0.874317	0.386588	1
glutamate_s	acetobacterium	intest_surgery1	-0.282265	0.193742	-1.45691	0.152084	1
glutamine_s	acetobacterium	(Intercept)	0.468703	0.140459	3.33694	0.00170607	1
glutamine_s	acetobacterium	acetobacterium	4919.95	4834.63	1.01765	0.314286	1
glutamine_s	acetobacterium	intest_surgery1	-0.289549	0.155554	-1.86141	0.0692261	1
histidine_s	acetobacterium	(Intercept)	-0.426721	0.176898	-2.41225	0.0199936	1
histidine_s	acetobacterium	acetobacterium	-5339.51	6088.86	-0.876931	0.385182	1
histidine_s	acetobacterium	intest_surgery1	0.0917963	0.195908	0.468568	0.641641	1
isoleucine_s	acetobacterium	(Intercept)	0.780146	0.130571	5.97489	3.40214278212936e-07	1
isoleucine_s	acetobacterium	acetobacterium	-934.572	4494.28	-0.207947	0.836209	1
isoleucine_s	acetobacterium	intest_surgery1	-0.0780692	0.144603	-0.539887	0.591936	1
lactate_s	acetobacterium	(Intercept)	0.723901	0.178299	4.06005	0.000193414	1
lactate_s	acetobacterium	acetobacterium	539.695	6137.09	0.0879398	0.930315	1
lactate_s	acetobacterium	intest_surgery1	-0.0121883	0.19746	-0.0617255	0.951055	1
leucine_s	acetobacterium	(Intercept)	1.1134	0.152645	7.29402	3.74122244921915e-09	1
leucine_s	acetobacterium	acetobacterium	-1474.28	5254.1	-0.280597	0.780306	1
leucine_s	acetobacterium	intest_surgery1	-0.017628	0.16905	-0.104277	0.917413	1
methylamine_s	acetobacterium	(Intercept)	-1.30651	0.294695	-4.43344	5.90257983135496e-05	1
methylamine_s	acetobacterium	acetobacterium	2141.66	10143.5	0.211136	0.833734	1
methylamine_s	acetobacterium	intest_surgery1	-0.867896	0.326365	-2.65928	0.0108085	1
phenylalanine_s	acetobacterium	(Intercept)	0.6254	0.140109	4.46366	5.35390110102922e-05	1
phenylalanine_s	acetobacterium	acetobacterium	-5262.06	4822.6	-1.09113	0.281025	1
phenylalanine_s	acetobacterium	intest_surgery1	0.09122	0.155166	0.587885	0.559548	1
propionate_s	acetobacterium	(Intercept)	3.09426	0.108502	28.518	1.88277988527577e-30	1
propionate_s	acetobacterium	acetobacterium	998.272	3734.68	0.267298	0.790461	1
propionate_s	acetobacterium	intest_surgery1	-0.0188899	0.120163	-0.157202	0.875789	1
succinate_s	acetobacterium	(Intercept)	0.596267	0.610497	0.976691	0.333943	1
succinate_s	acetobacterium	acetobacterium	-39631.4	21013.5	-1.886	0.0657595	1
succinate_s	acetobacterium	intest_surgery1	0.680796	0.676105	1.00694	0.319349	1
trimethylamine_s	acetobacterium	(Intercept)	-1.63086	0.186535	-8.7429	2.93381862982626e-11	1
trimethylamine_s	acetobacterium	acetobacterium	-8892.72	6420.6	-1.38503	0.172872	1
trimethylamine_s	acetobacterium	intest_surgery1	0.0986935	0.206582	0.477745	0.635144	1
tyrosine_s	acetobacterium	(Intercept)	0.659711	0.127399	5.17831	5.06902598020056e-06	1
tyrosine_s	acetobacterium	acetobacterium	-2823	4385.1	-0.64377	0.522992	1
tyrosine_s	acetobacterium	intest_surgery1	-0.0246254	0.14109	-0.174537	0.862227	1
valine_s	acetobacterium	(Intercept)	1.29684	0.164233	7.89633	4.8810965288286e-10	1
valine_s	acetobacterium	acetobacterium	-2963.6	5652.94	-0.524258	0.602672	1
valine_s	acetobacterium	intest_surgery1	-0.022474	0.181883	-0.123563	0.902211	1
lithocholenic_acid_ba	acetobacterium	(Intercept)	2.75284	0.575957	4.77959	1.90908839851731e-05	1
lithocholenic_acid_ba	acetobacterium	acetobacterium	38410.2	19824.6	1.9375	0.0589752	1
lithocholenic_acid_ba	acetobacterium	intest_surgery1	-1.74387	0.637853	-2.73397	0.00891602	1
isolithocholic_acid_ba	acetobacterium	(Intercept)	5.56683	0.501751	11.0948	1.81793639667266e-14	1
isolithocholic_acid_ba	acetobacterium	acetobacterium	41430.2	17270.4	2.39891	0.0206484	1
isolithocholic_acid_ba	acetobacterium	intest_surgery1	-1.80051	0.555672	-3.24024	0.00224901	1
allolithocholic_acid_ba	acetobacterium	(Intercept)	0.586856	0.46967	1.24951	0.217939	1
allolithocholic_acid_ba	acetobacterium	acetobacterium	53903.9	16166.2	3.33437	0.00171877	1
allolithocholic_acid_ba	acetobacterium	intest_surgery1	-1.2701	0.520144	-2.44182	0.0186078	1
x3a_12a_23_nordeoxycholic_acid_ba	acetobacterium	(Intercept)	-3.16976	0.589377	-5.37815	2.58724000310824e-06	1
x3a_12a_23_nordeoxycholic_acid_ba	acetobacterium	acetobacterium	4729.73	20286.5	0.233146	0.816705	1
x3a_12a_23_nordeoxycholic_acid_ba	acetobacterium	intest_surgery1	-0.132225	0.652716	-0.202577	0.840379	1
x3_6_diketocholanic_acid_ba	acetobacterium	(Intercept)	2.2642	0.501244	4.51716	4.50257107446298e-05	1
x3_6_diketocholanic_acid_ba	acetobacterium	acetobacterium	16567	17253	0.960242	0.342065	1
x3_6_diketocholanic_acid_ba	acetobacterium	intest_surgery1	-0.613482	0.555112	-1.10515	0.274969	1
x8_14_5b_cholenic_acid_3a_12a_diol_ba	acetobacterium	(Intercept)	4.20941	0.792936	5.30865	3.27075053768571e-06	1
x8_14_5b_cholenic_acid_3a_12a_diol_ba	acetobacterium	acetobacterium	39421.1	27293.1	1.44436	0.155564	1
x8_14_5b_cholenic_acid_3a_12a_diol_ba	acetobacterium	intest_surgery1	-2.65264	0.87815	-3.02071	0.00414792	1
x5b_cholenic_acid_7a_ol_3_one_ba	acetobacterium	(Intercept)	3.81476	0.340106	11.2164	1.26458738907618e-14	1
x5b_cholenic_acid_7a_ol_3_one_ba	acetobacterium	acetobacterium	-5817.18	11706.5	-0.496918	0.621666	1
x5b_cholenic_acid_7a_ol_3_one_ba	acetobacterium	intest_surgery1	-0.189362	0.376656	-0.502746	0.617595	1
x5a_cholanic_acid_3a_ol_6_one_ba	acetobacterium	(Intercept)	1.2581	1.32746	0.947748	0.34832	1
x5a_cholanic_acid_3a_ol_6_one_ba	acetobacterium	acetobacterium	18537.7	45691.5	0.405715	0.686875	1
x5a_cholanic_acid_3a_ol_6_one_ba	acetobacterium	intest_surgery1	-0.884446	1.47012	-0.601617	0.550448	1
x3a_hydroxy_12_ketolithocholic_acid_ba	acetobacterium	(Intercept)	3.87664	0.62327	6.21984	1.47175172245347e-07	0.442912
x3a_hydroxy_12_ketolithocholic_acid_ba	acetobacterium	acetobacterium	-83666.1	21453.1	-3.89995	0.000317982	0.442912
x3a_hydroxy_12_ketolithocholic_acid_ba	acetobacterium	intest_surgery1	1.62149	0.690251	2.34913	0.023267	0.442912
lithocholic_acid_ba	acetobacterium	(Intercept)	5.59537	0.504111	11.0995	1.79273138095925e-14	1
lithocholic_acid_ba	acetobacterium	acetobacterium	41822.1	17351.6	2.41027	0.0200897	1
lithocholic_acid_ba	acetobacterium	intest_surgery1	-1.81454	0.558287	-3.2502	0.00218632	1
x5b_cholanic_acid_3b_12a_diol_ba	acetobacterium	(Intercept)	3.08887	0.385785	8.00671	3.37041050470897e-10	1
x5b_cholanic_acid_3b_12a_diol_ba	acetobacterium	acetobacterium	-17808.9	13278.8	-1.34115	0.186603	1
x5b_cholanic_acid_3b_12a_diol_ba	acetobacterium	intest_surgery1	0.0568331	0.427244	0.133023	0.894769	1
chenodeoxycholic_acid_cdca_ba	acetobacterium	(Intercept)	4.55742	0.988756	4.60925	3.3371173108644e-05	1
chenodeoxycholic_acid_cdca_ba	acetobacterium	acetobacterium	-66901.4	34033.3	-1.96576	0.0555146	1
chenodeoxycholic_acid_cdca_ba	acetobacterium	intest_surgery1	2.23146	1.09502	2.03784	0.0474708	1
deoxycholic_acid_dca_ba	acetobacterium	(Intercept)	5.31593	1.08081	4.91849	1.20615125750333e-05	1
deoxycholic_acid_dca_ba	acetobacterium	acetobacterium	77808.7	37201.7	2.09154	0.0421546	1
deoxycholic_acid_dca_ba	acetobacterium	intest_surgery1	-3.94524	1.19696	-3.29605	0.00191842	1
hyodeoxycholic_acid_ba	acetobacterium	(Intercept)	4.57246	0.409367	11.1696	1.45396456830972e-14	1
hyodeoxycholic_acid_ba	acetobacterium	acetobacterium	4397.32	14090.5	0.312076	0.756424	1
hyodeoxycholic_acid_ba	acetobacterium	intest_surgery1	-0.371565	0.453361	-0.819579	0.416776	1
isodeoxycholic_acid_ba	acetobacterium	(Intercept)	-3.45572	0.969571	-3.56417	0.000878163	1
isodeoxycholic_acid_ba	acetobacterium	acetobacterium	56037.3	33372.9	1.67912	0.100059	1
isodeoxycholic_acid_ba	acetobacterium	intest_surgery1	-1.2973	1.07377	-1.20817	0.233291	1
murocholic_acid_muro_ca_ba	acetobacterium	(Intercept)	2.78361	0.932018	2.98665	0.00455222	1
murocholic_acid_muro_ca_ba	acetobacterium	acetobacterium	-39818.3	32080.3	-1.24121	0.22096	1
murocholic_acid_muro_ca_ba	acetobacterium	intest_surgery1	0.349775	1.03218	0.33887	0.736284	1
ursodeoxycholic_acid_udca_ba	acetobacterium	(Intercept)	4.15588	0.428199	9.70549	1.31538548492539e-12	1
ursodeoxycholic_acid_udca_ba	acetobacterium	acetobacterium	-35109.2	14738.7	-2.38211	0.0215014	1
ursodeoxycholic_acid_udca_ba	acetobacterium	intest_surgery1	0.591234	0.474216	1.24676	0.218936	1
x3a_hydroxy_7_12_diketo_cholanic_acid_ba	acetobacterium	(Intercept)	-1.09925	0.528805	-2.07874	0.0433722	1
x3a_hydroxy_7_12_diketo_cholanic_acid_ba	acetobacterium	acetobacterium	-35779.3	18201.6	-1.96572	0.0555198	1
x3a_hydroxy_7_12_diketo_cholanic_acid_ba	acetobacterium	intest_surgery1	0.410602	0.585634	0.701124	0.486836	1
x5b_cholanic_acid_3a_6a_diol_7_one_ba	acetobacterium	(Intercept)	-1.51396	0.511203	-2.96156	0.00487326	1
x5b_cholanic_acid_3a_6a_diol_7_one_ba	acetobacterium	acetobacterium	-2428.21	17595.7	-0.138	0.890856	1
x5b_cholanic_acid_3a_6a_diol_7_one_ba	acetobacterium	intest_surgery1	-0.386213	0.566141	-0.682186	0.498618	1
x3_dehydrocholic_acid_ba	acetobacterium	(Intercept)	2.02407	0.714809	2.83162	0.0069021	0.841126
x3_dehydrocholic_acid_ba	acetobacterium	acetobacterium	-85524.7	24603.9	-3.47606	0.00113883	0.841126
x3_dehydrocholic_acid_ba	acetobacterium	intest_surgery1	1.13854	0.791628	1.43823	0.157289	0.841126
cholic_acid_ca_ba	acetobacterium	(Intercept)	5.38556	0.615373	8.7517	2.85039429753723e-11	0.48173
cholic_acid_ca_ba	acetobacterium	acetobacterium	-81518.5	21181.3	-3.8486	0.000372331	0.48173
cholic_acid_ca_ba	acetobacterium	intest_surgery1	1.27769	0.681506	1.87481	0.067318	0.48173
hyocholic_acid_hca_ba	acetobacterium	(Intercept)	0.911664	0.304223	2.9967	0.00442925	1
hyocholic_acid_hca_ba	acetobacterium	acetobacterium	-5086.68	10471.4	-0.485767	0.629489	1
hyocholic_acid_hca_ba	acetobacterium	intest_surgery1	-0.151102	0.336917	-0.448485	0.655955	1
glycoursocholanic_acid_ba	acetobacterium	(Intercept)	-5.10165	0.606628	-8.40985	8.79576598934398e-11	1
glycoursocholanic_acid_ba	acetobacterium	acetobacterium	-13678.7	20880.3	-0.655102	0.515737	1
glycoursocholanic_acid_ba	acetobacterium	intest_surgery1	0.790288	0.67182	1.17634	0.245645	1
glycolithocholic_acid_glca_ba	acetobacterium	(Intercept)	-2.08936	0.453148	-4.61078	3.32047053646488e-05	1
glycolithocholic_acid_glca_ba	acetobacterium	acetobacterium	4205.56	15597.5	0.269631	0.788677	1
glycolithocholic_acid_glca_ba	acetobacterium	intest_surgery1	-0.123951	0.501846	-0.246991	0.806039	1
glycoursodeoxycholic_acid_gudca_ba	acetobacterium	(Intercept)	-1.7636	0.838097	-2.1043	0.040971	1
glycoursodeoxycholic_acid_gudca_ba	acetobacterium	acetobacterium	-60439.4	28847.5	-2.09513	0.0418182	1
glycoursodeoxycholic_acid_gudca_ba	acetobacterium	intest_surgery1	-0.355205	0.928165	-0.382696	0.703747	1
glycochenodeoxycholic_acid_gcdca_ba	acetobacterium	(Intercept)	1.484	0.347421	4.27146	9.92048649028328e-05	1
glycochenodeoxycholic_acid_gcdca_ba	acetobacterium	acetobacterium	-12976.9	11958.3	-1.08518	0.283624	1
glycochenodeoxycholic_acid_gcdca_ba	acetobacterium	intest_surgery1	0.483244	0.384758	1.25597	0.215609	1
glycodeoxycholic_acid_gdca_ba	acetobacterium	(Intercept)	0.0818001	0.613017	0.133439	0.894442	1
glycodeoxycholic_acid_gdca_ba	acetobacterium	acetobacterium	22230.4	21100.2	1.05356	0.297707	1
glycodeoxycholic_acid_gdca_ba	acetobacterium	intest_surgery1	-1.65152	0.678896	-2.43265	0.0190279	1
glycocholic_acid_gca_ba	acetobacterium	(Intercept)	0.565162	0.353337	1.5995	0.116708	1
glycocholic_acid_gca_ba	acetobacterium	acetobacterium	-11816	12162	-0.971552	0.336467	1
glycocholic_acid_gca_ba	acetobacterium	intest_surgery1	0.463401	0.391309	1.18423	0.242538	1
taurolithocholic_acid_tlca_ba	acetobacterium	(Intercept)	-1.10083	0.729977	-1.50803	0.138537	1
taurolithocholic_acid_tlca_ba	acetobacterium	acetobacterium	-14862	25126	-0.5915	0.557146	1
taurolithocholic_acid_tlca_ba	acetobacterium	intest_surgery1	-1.63917	0.808425	-2.02761	0.0485465	1
taurochenodeoxycholic_acid_tcdca_ba	acetobacterium	(Intercept)	0.230882	0.50545	0.456784	0.650023	1
taurochenodeoxycholic_acid_tcdca_ba	acetobacterium	acetobacterium	-18081.7	17397.7	-1.03931	0.304211	1
taurochenodeoxycholic_acid_tcdca_ba	acetobacterium	intest_surgery1	0.149513	0.559769	0.267098	0.790614	1
taurodeoxycholic_acid_tdca_ba	acetobacterium	(Intercept)	0.115533	0.671056	0.172166	0.864079	1
taurodeoxycholic_acid_tdca_ba	acetobacterium	acetobacterium	-2855.31	23097.9	-0.123618	0.902169	1
taurodeoxycholic_acid_tdca_ba	acetobacterium	intest_surgery1	-2.33737	0.743172	-3.14513	0.00293984	1
tauro_w_muricholic_acid_tw_mca_ba	acetobacterium	(Intercept)	-0.896836	0.764498	-1.1731	0.246926	0.395808
tauro_w_muricholic_acid_tw_mca_ba	acetobacterium	acetobacterium	-104796	26314.2	-3.98248	0.000246327	0.395808
tauro_w_muricholic_acid_tw_mca_ba	acetobacterium	intest_surgery1	0.185366	0.846656	0.218938	0.827688	0.395808
taurocholic_acid_tca_ba	acetobacterium	(Intercept)	1.36844	0.430759	3.17681	0.00269005	1
taurocholic_acid_tca_ba	acetobacterium	acetobacterium	-46217.6	14826.9	-3.11715	0.00317838	1
taurocholic_acid_tca_ba	acetobacterium	intest_surgery1	0.313265	0.477052	0.656669	0.514738	1
x2_hydroxybutyrate_p	acetohalobium	(Intercept)	-3.9736	0.1061	-37.4516	1.45223227423004e-35	1
x2_hydroxybutyrate_p	acetohalobium	acetohalobium	19721.3	11908.5	1.65607	0.104665	1
x2_hydroxybutyrate_p	acetohalobium	intest_surgery1	-0.294932	0.142495	-2.06977	0.0442433	1
x3_hydroxybutyrate_p	acetohalobium	(Intercept)	-3.87422	0.19	-20.3906	2.30678272942561e-24	1
x3_hydroxybutyrate_p	acetohalobium	acetohalobium	29106.1	21325.3	1.36486	0.179083	1
x3_hydroxybutyrate_p	acetohalobium	intest_surgery1	-0.258763	0.255175	-1.01406	0.315975	1
x3_hydroxyisovalerate_p	acetohalobium	(Intercept)	-4.6719	0.0304971	-153.192	8.24710721814785e-63	1
x3_hydroxyisovalerate_p	acetohalobium	acetohalobium	-1328.53	3422.94	-0.388125	0.699754	1
x3_hydroxyisovalerate_p	acetohalobium	intest_surgery1	0.0323001	0.0409583	0.788608	0.434476	1
acetate_p	acetohalobium	(Intercept)	-2.93483	0.0564853	-51.9574	8.090514709187e-42	1
acetate_p	acetohalobium	acetohalobium	-1495.75	6339.82	-0.235929	0.814558	1
acetate_p	acetohalobium	intest_surgery1	0.0900678	0.0758612	1.18727	0.24135	1
acetoacetate_p	acetohalobium	(Intercept)	-4.19259	0.104529	-40.1094	7.24914806460525e-37	1
acetoacetate_p	acetohalobium	acetohalobium	16300.2	11732.2	1.38936	0.171561	1
acetoacetate_p	acetohalobium	intest_surgery1	-0.0693418	0.140385	-0.49394	0.623751	1
alanine_p	acetohalobium	(Intercept)	-1.36761	0.0595049	-22.9832	1.67820254490474e-26	1
alanine_p	acetohalobium	acetohalobium	-11110	6678.74	-1.66349	0.103164	1
alanine_p	acetohalobium	intest_surgery1	0.192231	0.0799166	2.40539	0.0203279	1
citrate_p	acetohalobium	(Intercept)	-2.50309	0.0589079	-42.4917	5.76884025645457e-38	1
citrate_p	acetohalobium	acetohalobium	2304.72	6611.73	0.34858	0.72903	1
citrate_p	acetohalobium	intest_surgery1	-0.0462455	0.0791148	-0.584537	0.561778	1
creatinine_p	acetohalobium	(Intercept)	-3.83811	0.0717958	-53.4587	2.29057595262128e-42	1
creatinine_p	acetohalobium	acetohalobium	2825.46	8058.24	0.350629	0.727503	1
creatinine_p	acetohalobium	intest_surgery1	-0.117964	0.0964236	-1.2234	0.227547	1
formate_p	acetohalobium	(Intercept)	-2.90783	0.0616001	-47.205	5.61745868020346e-40	1
formate_p	acetohalobium	acetohalobium	3400.45	6913.9	0.491827	0.625232	1
formate_p	acetohalobium	intest_surgery1	0.0679415	0.0827306	0.821238	0.41584	1
glucose_p	acetohalobium	(Intercept)	1.1245	0.038282	29.3742	5.31504506606044e-31	1
glucose_p	acetohalobium	acetohalobium	2854.3	4296.71	0.664298	0.50989	1
glucose_p	acetohalobium	intest_surgery1	-0.0187611	0.0514137	-0.364905	0.716892	1
glutamine_p	acetohalobium	(Intercept)	-1.07282	0.0386282	-27.7729	5.82068405898798e-30	1
glutamine_p	acetohalobium	acetohalobium	-2191.53	4335.57	-0.505477	0.615691	1
glutamine_p	acetohalobium	intest_surgery1	0.122123	0.0518787	2.35401	0.0229981	1
glycine_p	acetohalobium	(Intercept)	-1.75759	0.072064	-24.3894	1.4084071548613e-27	1
glycine_p	acetohalobium	acetohalobium	-5327.54	8088.35	-0.658668	0.513465	1
glycine_p	acetohalobium	intest_surgery1	0.193491	0.0967838	1.99921	0.051646	1
histidine_p	acetohalobium	(Intercept)	-2.88946	0.0553578	-52.196	6.6044012307774e-42	1
histidine_p	acetohalobium	acetohalobium	-4806.66	6213.27	-0.773612	0.443205	1
histidine_p	acetohalobium	intest_surgery1	0.0529674	0.0743469	0.712435	0.479873	1
isoleucine_p	acetohalobium	(Intercept)	-3.43421	0.0607856	-56.497	1.9731256928249e-43	1
isoleucine_p	acetohalobium	acetohalobium	4339.23	6822.48	0.63602	0.527985	1
isoleucine_p	acetohalobium	intest_surgery1	0.00496132	0.0816366	0.0607732	0.951809	1
isopropanol_p	acetohalobium	(Intercept)	-5.16213	0.337624	-15.2896	1.94357892506854e-19	1
isopropanol_p	acetohalobium	acetohalobium	21399.9	37894.4	0.564723	0.575066	1
isopropanol_p	acetohalobium	intest_surgery1	-0.21889	0.453438	-0.482734	0.631625	1
lactate_p	acetohalobium	(Intercept)	-0.028432	0.0696292	-0.408335	0.684965	1
lactate_p	acetohalobium	acetohalobium	-18870.6	7815.07	-2.41465	0.0198779	1
lactate_p	acetohalobium	intest_surgery1	0.0509003	0.0935138	0.544308	0.588916	1
leucine_p	acetohalobium	(Intercept)	-2.89343	0.059012	-49.0312	1.05091889724012e-40	1
leucine_p	acetohalobium	acetohalobium	10026.4	6623.42	1.51378	0.137075	1
leucine_p	acetohalobium	intest_surgery1	0.00185534	0.0792547	0.0234098	0.981427	1
lysine_p	acetohalobium	(Intercept)	-2.48108	0.0546278	-45.4179	3.08019431635107e-39	1
lysine_p	acetohalobium	acetohalobium	-886.449	6131.34	-0.144577	0.885691	1
lysine_p	acetohalobium	intest_surgery1	0.0309594	0.0733666	0.421982	0.675048	1
phenylalanine_p	acetohalobium	(Intercept)	-3.29064	0.0446639	-73.6756	1.45105494203742e-48	1
phenylalanine_p	acetohalobium	acetohalobium	-5171.13	5013	-1.03154	0.307798	1
phenylalanine_p	acetohalobium	intest_surgery1	-0.0574028	0.0599847	-0.956957	0.343702	1
pyruvate_p	acetohalobium	(Intercept)	-3.08672	0.0793838	-38.8835	2.82011307492127e-36	1
pyruvate_p	acetohalobium	acetohalobium	-29012.8	8909.91	-3.25624	0.00214914	1
pyruvate_p	acetohalobium	intest_surgery1	0.0484081	0.106614	0.454048	0.651977	1
tryptophan_p	acetohalobium	(Intercept)	-3.50254	0.0646645	-54.1649	1.28032458019762e-42	1
tryptophan_p	acetohalobium	acetohalobium	2753.06	7257.84	0.379323	0.706232	1
tryptophan_p	acetohalobium	intest_surgery1	-0.0420096	0.0868461	-0.483725	0.630927	1
tyrosine_p	acetohalobium	(Intercept)	-3.18533	0.0599477	-53.1351	2.99786037232107e-42	1
tyrosine_p	acetohalobium	acetohalobium	-521.082	6728.43	-0.0774447	0.938613	1
tyrosine_p	acetohalobium	intest_surgery1	-0.0220704	0.0805113	-0.274128	0.785241	1
valine_p	acetohalobium	(Intercept)	-2.00777	0.0497568	-40.3516	5.56855049602039e-37	1
valine_p	acetohalobium	acetohalobium	5302.86	5584.63	0.949546	0.347415	1
valine_p	acetohalobium	intest_surgery1	-0.0787322	0.0668247	-1.17819	0.244914	1
acetate_s	acetohalobium	(Intercept)	4.27317	0.0709489	60.2289	1.15096735797909e-44	1
acetate_s	acetohalobium	acetohalobium	8075.12	7963.19	1.01406	0.315977	1
acetate_s	acetohalobium	intest_surgery1	-0.137265	0.0952861	-1.44055	0.156633	1
alanine_s	acetohalobium	(Intercept)	1.14784	0.115267	9.95812	5.93012048258337e-13	1
alanine_s	acetohalobium	acetohalobium	-1655.05	12937.4	-0.127928	0.898776	1
alanine_s	acetohalobium	intest_surgery1	0.199882	0.154806	1.29117	0.203237	1
aspartate_s	acetohalobium	(Intercept)	0.566838	0.117068	4.84195	1.55407966851316e-05	1
aspartate_s	acetohalobium	acetohalobium	12719.4	13139.6	0.96802	0.338208	1
aspartate_s	acetohalobium	intest_surgery1	-0.344094	0.157226	-2.18854	0.0338614	1
butyrate_s	acetohalobium	(Intercept)	2.57802	0.160503	16.0622	2.95989406754984e-20	1
butyrate_s	acetohalobium	acetohalobium	21085.9	18014.6	1.17049	0.247964	1
butyrate_s	acetohalobium	intest_surgery1	-0.388792	0.215559	-1.80364	0.0779842	1
formate_s	acetohalobium	(Intercept)	-1.17486	0.174554	-6.73065	2.55904700671407e-08	1
formate_s	acetohalobium	acetohalobium	-17178.8	19591.7	-0.876842	0.385229	1
formate_s	acetohalobium	intest_surgery1	0.155006	0.234431	0.661203	0.511853	1
glucose_s	acetohalobium	(Intercept)	1.93931	0.162041	11.968	1.39970335170886e-15	1
glucose_s	acetohalobium	acetohalobium	24114	18187.3	1.32587	0.191574	1
glucose_s	acetohalobium	intest_surgery1	0.0607398	0.217626	0.279102	0.781445	1
glutamate_s	acetohalobium	(Intercept)	1.2862	0.142853	9.00369	1.2520066497958e-11	1
glutamate_s	acetohalobium	acetohalobium	26594.1	16033.6	1.65865	0.104142	1
glutamate_s	acetohalobium	intest_surgery1	-0.333713	0.191855	-1.7394	0.088802	1
glutamine_s	acetohalobium	(Intercept)	0.482719	0.115288	4.18705	0.000129696	1
glutamine_s	acetohalobium	acetohalobium	20625.9	12939.8	1.59399	0.117939	1
glutamine_s	acetohalobium	intest_surgery1	-0.329956	0.154835	-2.13101	0.0385861	1
histidine_s	acetohalobium	(Intercept)	-0.480311	0.147869	-3.24821	0.0021987	1
histidine_s	acetohalobium	acetohalobium	-12562.2	16596.6	-0.756917	0.453044	1
histidine_s	acetohalobium	intest_surgery1	0.117823	0.198592	0.593293	0.555955	1
isoleucine_s	acetohalobium	(Intercept)	0.71117	0.107574	6.61096	3.85509282680328e-08	1
isoleucine_s	acetohalobium	acetohalobium	13054.1	12074	1.08118	0.285379	1
isoleucine_s	acetohalobium	intest_surgery1	-0.101195	0.144475	-0.700433	0.487263	1
lactate_s	acetohalobium	(Intercept)	0.69051	0.147987	4.66601	2.77217573069211e-05	1
lactate_s	acetohalobium	acetohalobium	11202	16609.9	0.674418	0.503495	1
lactate_s	acetohalobium	intest_surgery1	-0.0328444	0.198751	-0.165254	0.869484	1
leucine_s	acetohalobium	(Intercept)	1.03451	0.126271	8.19277	1.80978444102025e-10	1
leucine_s	acetohalobium	acetohalobium	12935.6	14172.4	0.912727	0.36625	1
leucine_s	acetohalobium	intest_surgery1	-0.0402124	0.169585	-0.237122	0.813638	1
methylamine_s	acetohalobium	(Intercept)	-1.27949	0.245883	-5.20366	4.65570943714004e-06	1
methylamine_s	acetohalobium	acetohalobium	3624.2	27597.5	0.131324	0.896105	1
methylamine_s	acetohalobium	intest_surgery1	-0.875768	0.330227	-2.65202	0.0110109	1
phenylalanine_s	acetohalobium	(Intercept)	0.502803	0.118178	4.25461	0.000104673	1
phenylalanine_s	acetohalobium	acetohalobium	5480.68	13264.1	0.413195	0.681426	1
phenylalanine_s	acetohalobium	intest_surgery1	0.0844553	0.158717	0.532114	0.597265	1
propionate_s	acetohalobium	(Intercept)	3.08279	0.0899727	34.2636	6.96558812948652e-34	1
propionate_s	acetohalobium	acetohalobium	7849.42	10098.4	0.777295	0.441052	1
propionate_s	acetohalobium	intest_surgery1	-0.0337389	0.120836	-0.279213	0.781361	1
succinate_s	acetohalobium	(Intercept)	0.0223034	0.525085	0.0424757	0.966307	1
succinate_s	acetohalobium	acetohalobium	-48142.3	58934.7	-0.816875	0.418304	1
succinate_s	acetohalobium	intest_surgery1	0.79213	0.705203	1.12327	0.267282	1
trimethylamine_s	acetohalobium	(Intercept)	-1.67793	0.153186	-10.9536	2.77800918589593e-14	1
trimethylamine_s	acetohalobium	acetohalobium	-31718.6	17193.3	-1.84482	0.0716512	1
trimethylamine_s	acetohalobium	intest_surgery1	0.161635	0.205732	0.785655	0.436187	1
tyrosine_s	acetohalobium	(Intercept)	0.574216	0.106224	5.40569	2.35741805122573e-06	1
tyrosine_s	acetohalobium	acetohalobium	7988.48	11922.4	0.670037	0.506258	1
tyrosine_s	acetohalobium	intest_surgery1	-0.0374161	0.142662	-0.262271	0.794309	1
valine_s	acetohalobium	(Intercept)	1.18845	0.136291	8.71996	3.16312741645085e-11	1
valine_s	acetohalobium	acetohalobium	13155.8	15297	0.860021	0.394336	1
valine_s	acetohalobium	intest_surgery1	-0.0445575	0.183042	-0.243428	0.80878	1
lithocholenic_acid_ba	acetohalobium	(Intercept)	2.98659	0.469679	6.35878	9.14495884036442e-08	1
lithocholenic_acid_ba	acetohalobium	acetohalobium	129207	52716	2.451	0.0181953	1
lithocholenic_acid_ba	acetohalobium	intest_surgery1	-2.00159	0.630791	-3.17314	0.00271798	1
isolithocholic_acid_ba	acetohalobium	(Intercept)	5.93624	0.420075	14.1314	3.69953406670338e-18	1
isolithocholic_acid_ba	acetohalobium	acetohalobium	109347	47148.5	2.3192	0.0249818	1
isolithocholic_acid_ba	acetohalobium	intest_surgery1	-2.02401	0.564171	-3.58759	0.000819157	1
allolithocholic_acid_ba	acetohalobium	(Intercept)	1.36086	0.428285	3.17745	0.00268522	1
allolithocholic_acid_ba	acetohalobium	acetohalobium	67186.3	48070	1.39767	0.169064	1
allolithocholic_acid_ba	acetohalobium	intest_surgery1	-1.42462	0.575198	-2.47675	0.0170829	1
x3a_12a_23_nordeoxycholic_acid_ba	acetohalobium	(Intercept)	-3.07094	0.491895	-6.24309	1.35913657488088e-07	1
x3a_12a_23_nordeoxycholic_acid_ba	acetohalobium	acetohalobium	-2013.91	55209.5	-0.0364775	0.971063	1
x3a_12a_23_nordeoxycholic_acid_ba	acetohalobium	intest_surgery1	-0.13143	0.660627	-0.198948	0.8432	1
x3_6_diketocholanic_acid_ba	acetohalobium	(Intercept)	2.3856	0.417003	5.72083	8.09346635123647e-07	1
x3_6_diketocholanic_acid_ba	acetohalobium	acetohalobium	50461	46803.8	1.07814	0.286717	1
x3_6_diketocholanic_acid_ba	acetohalobium	intest_surgery1	-0.715078	0.560046	-1.27682	0.208216	1
x8_14_5b_cholenic_acid_3a_12a_diol_ba	acetohalobium	(Intercept)	4.39255	0.647714	6.78161	2.14958419284424e-08	1
x8_14_5b_cholenic_acid_3a_12a_diol_ba	acetohalobium	acetohalobium	147137	72698.4	2.02393	0.0489387	1
x8_14_5b_cholenic_acid_3a_12a_diol_ba	acetohalobium	intest_surgery1	-2.94351	0.869897	-3.38374	0.00149046	1
x5b_cholenic_acid_7a_ol_3_one_ba	acetohalobium	(Intercept)	3.58955	0.281841	12.7361	1.59112656812444e-16	1
x5b_cholenic_acid_7a_ol_3_one_ba	acetohalobium	acetohalobium	29010.7	31633.4	0.91709	0.363984	1
x5b_cholenic_acid_7a_ol_3_one_ba	acetohalobium	intest_surgery1	-0.238494	0.37852	-0.630071	0.531835	1
x5a_cholanic_acid_3a_ol_6_one_ba	acetohalobium	(Intercept)	1.06341	1.09333	0.972635	0.335934	1
x5a_cholanic_acid_3a_ol_6_one_ba	acetohalobium	acetohalobium	141058	122714	1.14949	0.256427	1
x5a_cholanic_acid_3a_ol_6_one_ba	acetohalobium	intest_surgery1	-1.15165	1.46837	-0.784304	0.436971	1
x3a_hydroxy_12_ketolithocholic_acid_ba	acetohalobium	(Intercept)	2.6308	0.588555	4.46993	5.24644818074954e-05	1
x3a_hydroxy_12_ketolithocholic_acid_ba	acetohalobium	acetohalobium	-92895.9	66058.4	-1.40627	0.166512	1
x3a_hydroxy_12_ketolithocholic_acid_ba	acetohalobium	intest_surgery1	1.84067	0.790444	2.32866	0.0244281	1
lithocholic_acid_ba	acetohalobium	(Intercept)	5.97101	0.422387	14.1363	3.65207819583446e-18	1
lithocholic_acid_ba	acetohalobium	acetohalobium	109682	47408	2.31357	0.0253164	1
lithocholic_acid_ba	acetohalobium	intest_surgery1	-2.03889	0.567277	-3.59417	0.00080327	1
x5b_cholanic_acid_3b_12a_diol_ba	acetohalobium	(Intercept)	2.93412	0.321893	9.11522	8.71819460904051e-12	1
x5b_cholanic_acid_3b_12a_diol_ba	acetohalobium	acetohalobium	-48039.1	36128.7	-1.32967	0.190329	1
x5b_cholanic_acid_3b_12a_diol_ba	acetohalobium	intest_surgery1	0.154785	0.43231	0.358041	0.721987	1
chenodeoxycholic_acid_cdca_ba	acetohalobium	(Intercept)	3.60571	0.851848	4.23281	0.000112184	1
chenodeoxycholic_acid_cdca_ba	acetohalobium	acetohalobium	-85667.8	95610	-0.896013	0.375014	1
chenodeoxycholic_acid_cdca_ba	acetohalobium	intest_surgery1	2.42739	1.14405	2.12174	0.0393994	1
deoxycholic_acid_dca_ba	acetohalobium	(Intercept)	5.91259	0.893438	6.61779	3.76602842087027e-08	1
deoxycholic_acid_dca_ba	acetohalobium	acetohalobium	230222	100278	2.29584	0.0263977	1
deoxycholic_acid_dca_ba	acetohalobium	intest_surgery1	-4.4101	1.19991	-3.67536	0.000630027	1
hyodeoxycholic_acid_ba	acetohalobium	(Intercept)	4.45704	0.335	13.3046	3.33856764667423e-17	1
hyodeoxycholic_acid_ba	acetohalobium	acetohalobium	51179.6	37599.8	1.36117	0.180239	1
hyodeoxycholic_acid_ba	acetohalobium	intest_surgery1	-0.467106	0.449913	-1.03821	0.304717	1
isodeoxycholic_acid_ba	acetohalobium	(Intercept)	-3.43575	0.752185	-4.56769	3.82089359414044e-05	1
isodeoxycholic_acid_ba	acetohalobium	acetohalobium	270672	84424.1	3.2061	0.0024771	1
isodeoxycholic_acid_ba	acetohalobium	intest_surgery1	-1.82241	1.0102	-1.804	0.0779274	1
murocholic_acid_muro_ca_ba	acetohalobium	(Intercept)	1.92401	0.789955	2.4356	0.018892	1
murocholic_acid_muro_ca_ba	acetohalobium	acetohalobium	24042.3	88663.3	0.271164	0.787505	1
murocholic_acid_muro_ca_ba	acetohalobium	intest_surgery1	0.330219	1.06093	0.311254	0.757045	1
ursodeoxycholic_acid_udca_ba	acetohalobium	(Intercept)	3.55617	0.378148	9.4042	3.43620754792024e-12	1
ursodeoxycholic_acid_udca_ba	acetohalobium	acetohalobium	-19299.3	42442.7	-0.454715	0.6515	1
ursodeoxycholic_acid_udca_ba	acetohalobium	intest_surgery1	0.647489	0.507862	1.27493	0.208877	1
x3a_hydroxy_7_12_diketo_cholanic_acid_ba	acetohalobium	(Intercept)	-1.58337	0.454374	-3.48472	0.00111023	1
x3a_hydroxy_7_12_diketo_cholanic_acid_ba	acetohalobium	acetohalobium	-52178.9	50998.2	-1.02315	0.311705	1
x3a_hydroxy_7_12_diketo_cholanic_acid_ba	acetohalobium	intest_surgery1	0.526933	0.610236	0.86349	0.392447	1
x5b_cholanic_acid_3a_6a_diol_7_one_ba	acetohalobium	(Intercept)	-1.60652	0.426205	-3.76937	0.000474184	1
x5b_cholanic_acid_3a_6a_diol_7_one_ba	acetohalobium	acetohalobium	11740.4	47836.5	0.245427	0.807241	1
x5b_cholanic_acid_3a_6a_diol_7_one_ba	acetohalobium	intest_surgery1	-0.406052	0.572404	-0.70938	0.481748	1
x3_dehydrocholic_acid_ba	acetohalobium	(Intercept)	0.902593	0.647555	1.39385	0.17021	1
x3_dehydrocholic_acid_ba	acetohalobium	acetohalobium	-133872	72680.6	-1.84192	0.0720825	1
x3_dehydrocholic_acid_ba	acetohalobium	intest_surgery1	1.43321	0.869684	1.64797	0.106325	1
cholic_acid_ca_ba	acetohalobium	(Intercept)	4.37062	0.561164	7.78849	7.01541738796604e-10	1
cholic_acid_ca_ba	acetohalobium	acetohalobium	-141421	62984.1	-2.24535	0.0297045	1
cholic_acid_ca_ba	acetohalobium	intest_surgery1	1.58364	0.753657	2.10128	0.0412485	1
hyocholic_acid_hca_ba	acetohalobium	(Intercept)	0.757184	0.253689	2.98469	0.00457655	1
hyocholic_acid_hca_ba	acetohalobium	acetohalobium	14503.9	28473.7	0.509378	0.612976	1
hyocholic_acid_hca_ba	acetohalobium	intest_surgery1	-0.174349	0.340711	-0.511719	0.61135	1
glycoursocholanic_acid_ba	acetohalobium	(Intercept)	-5.29249	0.507809	-10.4222	1.40118913522199e-13	1
glycoursocholanic_acid_ba	acetohalobium	acetohalobium	-18475	56995.6	-0.324147	0.747329	1
glycoursocholanic_acid_ba	acetohalobium	intest_surgery1	0.832088	0.682	1.22007	0.228794	1
glycolithocholic_acid_glca_ba	acetohalobium	(Intercept)	-2.31029	0.364104	-6.34513	9.58274096528093e-08	1
glycolithocholic_acid_glca_ba	acetohalobium	acetohalobium	77240.2	40866.4	1.89006	0.0652008	1
glycolithocholic_acid_glca_ba	acetohalobium	intest_surgery1	-0.266672	0.489001	-0.545341	0.588212	1
glycoursodeoxycholic_acid_gudca_ba	acetohalobium	(Intercept)	-2.19417	0.688848	-3.18527	0.00262685	1
glycoursodeoxycholic_acid_gudca_ba	acetohalobium	acetohalobium	-187250	77315.2	-2.4219	0.0195314	1
glycoursodeoxycholic_acid_gudca_ba	acetohalobium	intest_surgery1	0.0211677	0.92514	0.0228805	0.981847	1
glycochenodeoxycholic_acid_gcdca_ba	acetohalobium	(Intercept)	1.32142	0.292063	4.52444	4.39739633892094e-05	1
glycochenodeoxycholic_acid_gcdca_ba	acetohalobium	acetohalobium	-22255.3	32780.7	-0.678914	0.50067	1
glycochenodeoxycholic_acid_gcdca_ba	acetohalobium	intest_surgery1	0.53148	0.392248	1.35496	0.182194	1
glycodeoxycholic_acid_gdca_ba	acetohalobium	(Intercept)	0.0376414	0.492137	0.0764857	0.939372	1
glycodeoxycholic_acid_gdca_ba	acetohalobium	acetohalobium	120707	55236.6	2.18527	0.0341153	1
glycodeoxycholic_acid_gdca_ba	acetohalobium	intest_surgery1	-1.88402	0.660952	-2.85047	0.00656574	1
glycocholic_acid_gca_ba	acetohalobium	(Intercept)	0.487007	0.293455	1.65956	0.103956	1
glycocholic_acid_gca_ba	acetohalobium	acetohalobium	-38148.4	32936.9	-1.15823	0.252881	1
glycocholic_acid_gca_ba	acetohalobium	intest_surgery1	0.539779	0.394117	1.36959	0.177611	1
taurolithocholic_acid_tlca_ba	acetohalobium	(Intercept)	-1.69179	0.602375	-2.80853	0.00733602	1
taurolithocholic_acid_tlca_ba	acetohalobium	acetohalobium	78109.3	67609.6	1.1553	0.254066	1
taurolithocholic_acid_tlca_ba	acetohalobium	intest_surgery1	-1.77194	0.809005	-2.19027	0.0337273	1
taurochenodeoxycholic_acid_tcdca_ba	acetohalobium	(Intercept)	0.0396599	0.423302	0.0936917	0.92577	1
taurochenodeoxycholic_acid_tcdca_ba	acetohalobium	acetohalobium	-40046.3	47510.8	-0.842889	0.403748	1
taurochenodeoxycholic_acid_tcdca_ba	acetohalobium	intest_surgery1	0.233124	0.568506	0.410065	0.683704	1
taurodeoxycholic_acid_tdca_ba	acetohalobium	(Intercept)	-0.0927619	0.557396	-0.16642	0.868572	1
taurodeoxycholic_acid_tdca_ba	acetohalobium	acetohalobium	39258.7	62561.2	0.627525	0.533487	1
taurodeoxycholic_acid_tdca_ba	acetohalobium	intest_surgery1	-2.40689	0.748597	-3.21521	0.00241424	1
tauro_w_muricholic_acid_tw_mca_ba	acetohalobium	(Intercept)	-2.41811	0.722334	-3.34764	0.00165433	1
tauro_w_muricholic_acid_tw_mca_ba	acetohalobium	acetohalobium	-126389	81073.6	-1.55894	0.126016	1
tauro_w_muricholic_acid_tw_mca_ba	acetohalobium	intest_surgery1	0.478108	0.970113	0.492838	0.624523	1
taurocholic_acid_tca_ba	acetohalobium	(Intercept)	0.730572	0.386913	1.88821	0.0654553	1
taurocholic_acid_tca_ba	acetohalobium	acetohalobium	-64199.7	43426.5	-1.47835	0.146279	1
taurocholic_acid_tca_ba	acetohalobium	intest_surgery1	0.457724	0.519634	0.880857	0.383076	1
x2_hydroxybutyrate_p	acetomicrobium	(Intercept)	-3.84567	0.10574	-36.369	5.21618159841996e-35	1
x2_hydroxybutyrate_p	acetomicrobium	acetomicrobium	-59347.9	49878	-1.18986	0.240341	1
x2_hydroxybutyrate_p	acetomicrobium	intest_surgery1	-0.257562	0.142851	-1.80301	0.0780854	1
x3_hydroxybutyrate_p	acetomicrobium	(Intercept)	-3.82751	0.188924	-20.2595	2.99855127408896e-24	1
x3_hydroxybutyrate_p	acetomicrobium	acetomicrobium	78163.7	89116	0.8771	0.385091	1
x3_hydroxybutyrate_p	acetomicrobium	intest_surgery1	-0.208019	0.25523	-0.815028	0.419349	1
x3_hydroxyisovalerate_p	acetomicrobium	(Intercept)	-4.6702	0.0299111	-156.136	3.50679186711865e-63	1
x3_hydroxyisovalerate_p	acetomicrobium	acetomicrobium	-8030.05	14109.1	-0.569138	0.572092	1
x3_hydroxyisovalerate_p	acetomicrobium	intest_surgery1	0.0301026	0.0404088	0.744951	0.460175	1
acetate_p	acetomicrobium	(Intercept)	-2.91426	0.0546808	-53.2959	2.62219449951209e-42	1
acetate_p	acetomicrobium	acetomicrobium	-30801.7	25793.1	-1.19418	0.238663	1
acetate_p	acetomicrobium	intest_surgery1	0.0881724	0.0738718	1.19359	0.238894	1
acetoacetate_p	acetomicrobium	(Intercept)	-4.16971	0.103813	-40.1657	6.81723350391738e-37	1
acetoacetate_p	acetomicrobium	acetomicrobium	47597.3	48968.8	0.971993	0.33625	1
acetoacetate_p	acetomicrobium	intest_surgery1	-0.0410256	0.140247	-0.292523	0.771231	1
alanine_p	acetomicrobium	(Intercept)	-1.40725	0.0602285	-23.3652	8.4530662011644e-27	1
alanine_p	acetomicrobium	acetomicrobium	-4393.42	28410	-0.154644	0.877794	1
alanine_p	acetomicrobium	intest_surgery1	0.172185	0.0813665	2.11616	0.0398962	1
citrate_p	acetomicrobium	(Intercept)	-2.49992	0.057925	-43.1579	2.91188870229769e-38	1
citrate_p	acetomicrobium	acetomicrobium	6801.77	27323.4	0.248936	0.804543	1
citrate_p	acetomicrobium	intest_surgery1	-0.0422438	0.0782546	-0.539825	0.591979	1
creatinine_p	acetomicrobium	(Intercept)	-3.81936	0.0705904	-54.106	1.34362880089331e-42	1
creatinine_p	acetomicrobium	acetomicrobium	-8994.8	33297.7	-0.270133	0.788293	1
creatinine_p	acetomicrobium	intest_surgery1	-0.112597	0.095365	-1.1807	0.243925	1
formate_p	acetomicrobium	(Intercept)	-2.89868	0.0606757	-47.7733	3.31232347386067e-40	1
formate_p	acetomicrobium	acetomicrobium	4819.72	28620.9	0.168399	0.867024	1
formate_p	acetomicrobium	intest_surgery1	0.0739846	0.0819707	0.902573	0.371558	1
glucose_p	acetomicrobium	(Intercept)	1.11853	0.0372719	30.0101	2.12250453799248e-31	1
glucose_p	acetomicrobium	acetomicrobium	19969.1	17581.3	1.13582	0.262046	1
glucose_p	acetomicrobium	intest_surgery1	-0.0141121	0.050353	-0.280263	0.78056	1
glutamine_p	acetomicrobium	(Intercept)	-1.08515	0.0380409	-28.5257	1.86100611697495e-30	1
glutamine_p	acetomicrobium	acetomicrobium	4392.81	17944	0.244807	0.807719	1
glutamine_p	acetomicrobium	intest_surgery1	0.118029	0.0513919	2.29664	0.0263477	1
glycine_p	acetomicrobium	(Intercept)	-1.78731	0.0710798	-25.1451	3.91092337455774e-28	1
glycine_p	acetomicrobium	acetomicrobium	10375.3	33528.5	0.309446	0.758411	1
glycine_p	acetomicrobium	intest_surgery1	0.183547	0.0960262	1.91142	0.0623315	1
histidine_p	acetomicrobium	(Intercept)	-2.89605	0.0545742	-53.0663	3.17490930487823e-42	1
histidine_p	acetomicrobium	acetomicrobium	-14214.2	25742.8	-0.552162	0.583569	1
histidine_p	acetomicrobium	intest_surgery1	0.0446221	0.0737278	0.605228	0.548068	1
isoleucine_p	acetomicrobium	(Intercept)	-3.40591	0.0598541	-56.9036	1.43518065900576e-43	1
isoleucine_p	acetomicrobium	acetomicrobium	-13226.1	28233.3	-0.468455	0.64172	1
isoleucine_p	acetomicrobium	intest_surgery1	0.013188	0.0808607	0.163096	0.871173	1
isopropanol_p	acetomicrobium	(Intercept)	-5.05054	0.332786	-15.1765	2.57365715824566e-19	1
isopropanol_p	acetomicrobium	acetomicrobium	-32633.9	156976	-0.207891	0.836252	1
isopropanol_p	acetomicrobium	intest_surgery1	-0.179185	0.449581	-0.398559	0.692103	1
lactate_p	acetomicrobium	(Intercept)	-0.0662287	0.0715035	-0.92623	0.359268	1
lactate_p	acetomicrobium	acetomicrobium	-41911	33728.4	-1.2426	0.220451	1
lactate_p	acetomicrobium	intest_surgery1	0.017768	0.0965987	0.183936	0.85489	1
leucine_p	acetomicrobium	(Intercept)	-2.83882	0.0591743	-47.9739	2.75293346064137e-40	1
leucine_p	acetomicrobium	acetomicrobium	-18007.6	27912.7	-0.645141	0.522112	1
leucine_p	acetomicrobium	intest_surgery1	0.0205304	0.0799423	0.256816	0.798492	1
lysine_p	acetomicrobium	(Intercept)	-2.48257	0.0536884	-46.2402	1.39670085818587e-39	1
lysine_p	acetomicrobium	acetomicrobium	-2311.01	25325	-0.0912542	0.927696	1
lysine_p	acetomicrobium	intest_surgery1	0.0294121	0.0725311	0.40551	0.687024	1
phenylalanine_p	acetomicrobium	(Intercept)	-3.29922	0.0441985	-74.6455	8.0930188325495e-49	1
phenylalanine_p	acetomicrobium	acetomicrobium	-13551.9	20848.6	-0.650015	0.518987	1
phenylalanine_p	acetomicrobium	intest_surgery1	-0.0664271	0.0597106	-1.11248	0.271838	1
pyruvate_p	acetomicrobium	(Intercept)	-3.18785	0.0865952	-36.8133	3.07316161582313e-35	1
pyruvate_p	acetomicrobium	acetomicrobium	-14253.9	40847.2	-0.348956	0.72875	1
pyruvate_p	acetomicrobium	intest_surgery1	-0.00386609	0.116987	-0.0330472	0.973783	1
tryptophan_p	acetomicrobium	(Intercept)	-3.47752	0.0634273	-54.8268	7.47158988315509e-43	1
tryptophan_p	acetomicrobium	acetomicrobium	-16647	29918.8	-0.556404	0.580691	1
tryptophan_p	acetomicrobium	intest_surgery1	-0.0365705	0.085688	-0.426787	0.67157	1
tyrosine_p	acetomicrobium	(Intercept)	-3.20971	0.0583338	-55.0232	6.37586929056863e-43	1
tyrosine_p	acetomicrobium	acetomicrobium	26065.1	27516.2	0.947263	0.348564	1
tyrosine_p	acetomicrobium	intest_surgery1	-0.0237093	0.0788068	-0.300854	0.764912	1
valine_p	acetomicrobium	(Intercept)	-1.97612	0.0492173	-40.151	6.92728651658034e-37	1
valine_p	acetomicrobium	acetomicrobium	-12740.9	23215.9	-0.548801	0.585855	1
valine_p	acetomicrobium	intest_surgery1	-0.0687696	0.0664908	-1.03427	0.306536	1
acetate_s	acetomicrobium	(Intercept)	4.23973	0.0663165	63.9317	8.09541088612597e-46	1
acetate_s	acetomicrobium	acetomicrobium	75806.8	31281.7	2.42336	0.0194621	1
acetate_s	acetomicrobium	intest_surgery1	-0.124626	0.0895912	-1.39105	0.17105	1
alanine_s	acetomicrobium	(Intercept)	1.17996	0.112393	10.4985	1.10829348107331e-13	1
alanine_s	acetomicrobium	acetomicrobium	-45000.5	53016.2	-0.848806	0.400482	1
alanine_s	acetomicrobium	intest_surgery1	0.198075	0.151839	1.3045	0.198694	1
aspartate_s	acetomicrobium	(Intercept)	0.59576	0.115978	5.13683	5.82502285338656e-06	1
aspartate_s	acetomicrobium	acetomicrobium	24230.5	54707.1	0.442912	0.659951	1
aspartate_s	acetomicrobium	intest_surgery1	-0.321655	0.156682	-2.05292	0.0459221	1
butyrate_s	acetomicrobium	(Intercept)	2.49999	0.148785	16.8027	5.17158461966988e-21	1
butyrate_s	acetomicrobium	acetomicrobium	187100	70182.1	2.66593	0.0106262	1
butyrate_s	acetomicrobium	intest_surgery1	-0.355501	0.201003	-1.76864	0.0837328	1
formate_s	acetomicrobium	(Intercept)	-1.24201	0.172988	-7.17978	5.51917422177978e-09	1
formate_s	acetomicrobium	acetomicrobium	33.8283	81598.7	0.000414569	0.999671	1
formate_s	acetomicrobium	intest_surgery1	0.123829	0.2337	0.529862	0.598812	1
glucose_s	acetomicrobium	(Intercept)	2.0108	0.162097	12.405	4.02527880408833e-16	1
glucose_s	acetomicrobium	acetomicrobium	26501.9	76461.5	0.346605	0.730504	1
glucose_s	acetomicrobium	intest_surgery1	0.103798	0.218987	0.473991	0.637798	1
glutamate_s	acetomicrobium	(Intercept)	1.27686	0.138448	9.22267	6.16013074528303e-12	1
glutamate_s	acetomicrobium	acetomicrobium	132091	65306.2	2.02264	0.0490767	1
glutamate_s	acetomicrobium	intest_surgery1	-0.288962	0.187038	-1.54494	0.129366	1
glutamine_s	acetomicrobium	(Intercept)	0.508717	0.114693	4.43548	5.86384710476219e-05	1
glutamine_s	acetomicrobium	acetomicrobium	63670.5	54100.9	1.17688	0.24543	1
glutamine_s	acetomicrobium	intest_surgery1	-0.294217	0.154946	-1.89884	0.0640087	1
histidine_s	acetomicrobium	(Intercept)	-0.555369	0.145914	-3.80613	0.000423967	1
histidine_s	acetomicrobium	acetomicrobium	30295.6	68828.1	0.440164	0.661926	1
histidine_s	acetomicrobium	intest_surgery1	0.0942192	0.197125	0.477967	0.634987	1
isoleucine_s	acetomicrobium	(Intercept)	0.72198	0.106044	6.80831	1.96192466994367e-08	1
isoleucine_s	acetomicrobium	acetomicrobium	46880.4	50021.2	0.937211	0.353653	1
isoleucine_s	acetomicrobium	intest_surgery1	-0.0787509	0.143261	-0.5497	0.585243	1
lactate_s	acetomicrobium	(Intercept)	0.620398	0.139998	4.43148	5.93994656776299e-05	1
lactate_s	acetomicrobium	acetomicrobium	132822	66037.4	2.01132	0.0503043	1
lactate_s	acetomicrobium	intest_surgery1	-0.0160471	0.189132	-0.0848459	0.93276	1
leucine_s	acetomicrobium	(Intercept)	1.0434	0.124281	8.39552	9.22355326419751e-11	1
leucine_s	acetomicrobium	acetomicrobium	48573.6	58623.7	0.828566	0.411723	1
leucine_s	acetomicrobium	intest_surgery1	-0.0180283	0.167899	-0.107376	0.914968	1
methylamine_s	acetomicrobium	(Intercept)	-1.26461	0.241667	-5.23285	4.22095393328359e-06	1
methylamine_s	acetomicrobium	acetomicrobium	-845.163	113995	-0.00741404	0.994117	1
methylamine_s	acetomicrobium	intest_surgery1	-0.869168	0.326483	-2.66222	0.0107276	1
phenylalanine_s	acetomicrobium	(Intercept)	0.524537	0.11635	4.50827	4.63416594609548e-05	1
phenylalanine_s	acetomicrobium	acetomicrobium	-373.349	54882.5	-0.00680269	0.994602	1
phenylalanine_s	acetomicrobium	intest_surgery1	0.0944118	0.157184	0.600643	0.551091	1
propionate_s	acetomicrobium	(Intercept)	3.07679	0.0879725	34.9745	2.8567565604047e-34	1
propionate_s	acetomicrobium	acetomicrobium	42766	41496.9	1.03059	0.308243	1
propionate_s	acetomicrobium	intest_surgery1	-0.0206309	0.118848	-0.173591	0.862966	1
succinate_s	acetomicrobium	(Intercept)	0.379346	0.479387	0.791315	0.432911	1
succinate_s	acetomicrobium	acetomicrobium	-635816	226128	-2.81175	0.00727405	1
succinate_s	acetomicrobium	intest_surgery1	0.72167	0.647634	1.11432	0.27106	1
trimethylamine_s	acetomicrobium	(Intercept)	-1.79073	0.156065	-11.4743	5.89395115187932e-15	1
trimethylamine_s	acetomicrobium	acetomicrobium	-12977.9	73616.3	-0.176291	0.860856	1
trimethylamine_s	acetomicrobium	intest_surgery1	0.104416	0.210838	0.495242	0.622839	1
tyrosine_s	acetomicrobium	(Intercept)	0.577485	0.104396	5.5317	1.53885846213389e-06	1
tyrosine_s	acetomicrobium	acetomicrobium	32590.8	49243.6	0.661828	0.511457	1
tyrosine_s	acetomicrobium	intest_surgery1	-0.0237851	0.141035	-0.168648	0.86683	1
valine_s	acetomicrobium	(Intercept)	1.222	0.134864	9.06102	1.03928718703278e-11	1
valine_s	acetomicrobium	acetomicrobium	20813.8	63615.7	0.32718	0.745049	1
valine_s	acetomicrobium	intest_surgery1	-0.0212356	0.182196	-0.116553	0.907733	1
lithocholenic_acid_ba	acetomicrobium	(Intercept)	3.09249	0.468863	6.59572	4.06170157701542e-08	1
lithocholenic_acid_ba	acetomicrobium	acetomicrobium	465287	221164	2.10381	0.0410155	1
lithocholenic_acid_ba	acetomicrobium	intest_surgery1	-1.77947	0.633417	-2.80932	0.00732085	1
isolithocholic_acid_ba	acetomicrobium	(Intercept)	6.02429	0.41849	14.3953	1.86503511570375e-18	1
isolithocholic_acid_ba	acetomicrobium	acetomicrobium	395611	197403	2.00408	0.0511027	1
isolithocholic_acid_ba	acetomicrobium	intest_surgery1	-1.83609	0.565365	-3.24761	0.00220245	1
allolithocholic_acid_ba	acetomicrobium	(Intercept)	1.25864	0.408339	3.08234	0.00350073	1
allolithocholic_acid_ba	acetomicrobium	acetomicrobium	425391	192614	2.20851	0.0323447	1
allolithocholic_acid_ba	acetomicrobium	intest_surgery1	-1.31401	0.551651	-2.38195	0.0215093	1
x3a_12a_23_nordeoxycholic_acid_ba	acetomicrobium	(Intercept)	-3.18711	0.481725	-6.61604	3.7886269596202e-08	1
x3a_12a_23_nordeoxycholic_acid_ba	acetomicrobium	acetomicrobium	126310	227231	0.555865	0.581057	1
x3a_12a_23_nordeoxycholic_acid_ba	acetomicrobium	intest_surgery1	-0.138445	0.650792	-0.212732	0.832497	1
x3_6_diketocholanic_acid_ba	acetomicrobium	(Intercept)	2.26737	0.39842	5.69091	8.96103379458481e-07	1
x3_6_diketocholanic_acid_ba	acetomicrobium	acetomicrobium	367852	187936	1.95733	0.0565289	1
x3_6_diketocholanic_acid_ba	acetomicrobium	intest_surgery1	-0.633282	0.538251	-1.17656	0.245559	1
x8_14_5b_cholenic_acid_3a_12a_diol_ba	acetomicrobium	(Intercept)	4.45328	0.637242	6.98836	1.06029156586788e-08	1
x8_14_5b_cholenic_acid_3a_12a_diol_ba	acetomicrobium	acetomicrobium	599679	300589	1.99501	0.0521183	1
x8_14_5b_cholenic_acid_3a_12a_diol_ba	acetomicrobium	intest_surgery1	-2.69243	0.86089	-3.12749	0.00308818	1
x5b_cholenic_acid_7a_ol_3_one_ba	acetomicrobium	(Intercept)	3.67013	0.279271	13.1418	5.19924776011356e-17	1
x5b_cholenic_acid_7a_ol_3_one_ba	acetomicrobium	acetomicrobium	38222	131733	0.290148	0.773036	1
x5b_cholenic_acid_7a_ol_3_one_ba	acetomicrobium	intest_surgery1	-0.186861	0.377285	-0.495279	0.622813	1
x5a_cholanic_acid_3a_ol_6_one_ba	acetomicrobium	(Intercept)	1.75671	1.08878	1.61346	0.113636	1
x5a_cholanic_acid_3a_ol_6_one_ba	acetomicrobium	acetomicrobium	-165798	513581	-0.322828	0.74832	1
x5a_cholanic_acid_3a_ol_6_one_ba	acetomicrobium	intest_surgery1	-0.891246	1.4709	-0.605918	0.547614	1
x3a_hydroxy_12_ketolithocholic_acid_ba	acetomicrobium	(Intercept)	3.08694	0.507976	6.07694	2.40007906087143e-07	0.39221
x3a_hydroxy_12_ketolithocholic_acid_ba	acetomicrobium	acetomicrobium	-955340	239613	-3.98701	0.000242889	0.39221
x3a_hydroxy_12_ketolithocholic_acid_ba	acetomicrobium	intest_surgery1	1.69749	0.686257	2.47355	0.0172179	0.39221
lithocholic_acid_ba	acetomicrobium	(Intercept)	6.05736	0.42055	14.4034	1.82632142534347e-18	1
lithocholic_acid_ba	acetomicrobium	acetomicrobium	399109	198375	2.0119	0.050241	1
lithocholic_acid_ba	acetomicrobium	intest_surgery1	-1.85045	0.568148	-3.25698	0.00214461	1
x5b_cholanic_acid_3b_12a_diol_ba	acetomicrobium	(Intercept)	2.70055	0.322023	8.38621	9.5126015064211e-11	1
x5b_cholanic_acid_3b_12a_diol_ba	acetomicrobium	acetomicrobium	53501.3	151899	0.352216	0.726321	1
x5b_cholanic_acid_3b_12a_diol_ba	acetomicrobium	intest_surgery1	0.0661789	0.435042	0.152121	0.879772	1
chenodeoxycholic_acid_cdca_ba	acetomicrobium	(Intercept)	3.65978	0.832268	4.39736	6.6296938300959e-05	1
chenodeoxycholic_acid_cdca_ba	acetomicrobium	acetomicrobium	-453464	392583	-1.15508	0.254155	1
chenodeoxycholic_acid_cdca_ba	acetomicrobium	intest_surgery1	2.28397	1.12436	2.03135	0.0481509	1
deoxycholic_acid_dca_ba	acetomicrobium	(Intercept)	6.14566	0.894841	6.86788	1.60035446335127e-08	1
deoxycholic_acid_dca_ba	acetomicrobium	acetomicrobium	777293	422099	1.8415	0.072146	1
deoxycholic_acid_dca_ba	acetomicrobium	intest_surgery1	-4.01296	1.2089	-3.31952	0.00179367	1
hyodeoxycholic_acid_ba	acetomicrobium	(Intercept)	4.61932	0.335614	13.7638	9.73933050577663e-18	1
hyodeoxycholic_acid_ba	acetomicrobium	acetomicrobium	43965.2	158310	0.277716	0.782503	1
hyodeoxycholic_acid_ba	acetomicrobium	intest_surgery1	-0.375393	0.453402	-0.827947	0.41207	1
isodeoxycholic_acid_ba	acetomicrobium	(Intercept)	-2.62857	0.814014	-3.22914	0.00232091	1
isodeoxycholic_acid_ba	acetomicrobium	acetomicrobium	292022	383972	0.760529	0.450905	1
isodeoxycholic_acid_ba	acetomicrobium	intest_surgery1	-1.33895	1.0997	-1.21756	0.229739	1
murocholic_acid_muro_ca_ba	acetomicrobium	(Intercept)	2.15346	0.775289	2.77762	0.00795675	1
murocholic_acid_muro_ca_ba	acetomicrobium	acetomicrobium	-158044	365706	-0.432161	0.667689	1
murocholic_acid_muro_ca_ba	acetomicrobium	intest_surgery1	0.378055	1.04739	0.360951	0.719825	1
ursodeoxycholic_acid_udca_ba	acetomicrobium	(Intercept)	3.78313	0.35538	10.6453	7.07134262987637e-14	1
ursodeoxycholic_acid_udca_ba	acetomicrobium	acetomicrobium	-352653	167634	-2.10371	0.0410246	1
ursodeoxycholic_acid_udca_ba	acetomicrobium	intest_surgery1	0.621843	0.480105	1.29522	0.201849	1
x3a_hydroxy_7_12_diketo_cholanic_acid_ba	acetomicrobium	(Intercept)	-1.38865	0.427099	-3.25135	0.00217919	1
x3a_hydroxy_7_12_diketo_cholanic_acid_ba	acetomicrobium	acetomicrobium	-464889	201464	-2.30756	0.0256784	1
x3a_hydroxy_7_12_diketo_cholanic_acid_ba	acetomicrobium	intest_surgery1	0.444601	0.576995	0.770545	0.445003	1
x5b_cholanic_acid_3a_6a_diol_7_one_ba	acetomicrobium	(Intercept)	-1.62573	0.41841	-3.88548	0.000332464	1
x5b_cholanic_acid_3a_6a_diol_7_one_ba	acetomicrobium	acetomicrobium	75899.2	197365	0.384563	0.702373	1
x5b_cholanic_acid_3a_6a_diol_7_one_ba	acetomicrobium	intest_surgery1	-0.386763	0.565257	-0.684226	0.497341	1
x3_dehydrocholic_acid_ba	acetomicrobium	(Intercept)	1.3301	0.559182	2.37865	0.0216804	0.285794
x3_dehydrocholic_acid_ba	acetomicrobium	acetomicrobium	-1.10867e+06	263767	-4.20323	0.00012322	0.285794
x3_dehydrocholic_acid_ba	acetomicrobium	intest_surgery1	1.21974	0.755434	1.61462	0.113384	0.285794
cholic_acid_ca_ba	acetomicrobium	(Intercept)	4.41619	0.538093	8.20712	1.72525237496069e-10	1
cholic_acid_ca_ba	acetomicrobium	acetomicrobium	-697621	253820	-2.74849	0.00858567	1
cholic_acid_ca_ba	acetomicrobium	intest_surgery1	1.34554	0.726944	1.85095	0.0707466	1
hyocholic_acid_hca_ba	acetomicrobium	(Intercept)	0.891332	0.248373	3.58868	0.000816494	1
hyocholic_acid_hca_ba	acetomicrobium	acetomicrobium	-90365.6	117158	-0.771312	0.444553	1
hyocholic_acid_hca_ba	acetomicrobium	intest_surgery1	-0.145623	0.335543	-0.433992	0.666368	1
glycoursocholanic_acid_ba	acetomicrobium	(Intercept)	-5.30559	0.499114	-10.63	7.40917648632888e-14	1
glycoursocholanic_acid_ba	acetomicrobium	acetomicrobium	-68911.3	235433	-0.2927	0.771097	1
glycoursocholanic_acid_ba	acetomicrobium	intest_surgery1	0.800392	0.674285	1.18702	0.241447	1
glycolithocholic_acid_glca_ba	acetomicrobium	(Intercept)	-1.98437	0.371617	-5.33982	2.94452900258609e-06	1
glycolithocholic_acid_glca_ba	acetomicrobium	acetomicrobium	-28145.2	175293	-0.160561	0.873158	1
glycolithocholic_acid_glca_ba	acetomicrobium	intest_surgery1	-0.125746	0.502041	-0.250469	0.803364	1
glycoursodeoxycholic_acid_gudca_ba	acetomicrobium	(Intercept)	-2.17428	0.664229	-3.27338	0.00204672	1
glycoursodeoxycholic_acid_gudca_ba	acetomicrobium	acetomicrobium	-876504	313318	-2.79748	0.0075525	1
glycoursodeoxycholic_acid_gudca_ba	acetomicrobium	intest_surgery1	-0.295348	0.897349	-0.329134	0.743582	1
glycochenodeoxycholic_acid_gcdca_ba	acetomicrobium	(Intercept)	1.3852	0.283066	4.89356	1.31007768039116e-05	1
glycochenodeoxycholic_acid_gcdca_ba	acetomicrobium	acetomicrobium	-175802	133523	-1.31665	0.194623	1
glycochenodeoxycholic_acid_gcdca_ba	acetomicrobium	intest_surgery1	0.495766	0.382411	1.29642	0.201439	1
glycodeoxycholic_acid_gdca_ba	acetomicrobium	(Intercept)	0.208469	0.496388	0.419972	0.676504	1
glycodeoxycholic_acid_gdca_ba	acetomicrobium	acetomicrobium	350826	234148	1.49831	0.141035	1
glycodeoxycholic_acid_gdca_ba	acetomicrobium	intest_surgery1	-1.67429	0.670602	-2.49669	0.0162642	1
glycocholic_acid_gca_ba	acetomicrobium	(Intercept)	0.484985	0.287573	1.68648	0.0986257	1
glycocholic_acid_gca_ba	acetomicrobium	acetomicrobium	-171486	135649	-1.26419	0.21267	1
glycocholic_acid_gca_ba	acetomicrobium	intest_surgery1	0.475107	0.3885	1.22293	0.227724	1
taurolithocholic_acid_tlca_ba	acetomicrobium	(Intercept)	-1.27498	0.599237	-2.12767	0.0388776	1
taurolithocholic_acid_tlca_ba	acetomicrobium	acetomicrobium	-130191	282662	-0.460589	0.647312	1
taurolithocholic_acid_tlca_ba	acetomicrobium	intest_surgery1	-1.62672	0.809547	-2.00942	0.0505124	1
taurochenodeoxycholic_acid_tcdca_ba	acetomicrobium	(Intercept)	0.0725386	0.413386	0.175474	0.861494	1
taurochenodeoxycholic_acid_tcdca_ba	acetomicrobium	acetomicrobium	-220840	194995	-1.13254	0.263405	1
taurochenodeoxycholic_acid_tcdca_ba	acetomicrobium	intest_surgery1	0.16632	0.558469	0.297814	0.767215	1
taurodeoxycholic_acid_tdca_ba	acetomicrobium	(Intercept)	0.0746117	0.550101	0.135633	0.892717	1
taurodeoxycholic_acid_tdca_ba	acetomicrobium	acetomicrobium	-16308.8	259484	-0.0628508	0.950164	1
taurodeoxycholic_acid_tdca_ba	acetomicrobium	intest_surgery1	-2.33521	0.743166	-3.14224	0.00296362	1
tauro_w_muricholic_acid_tw_mca_ba	acetomicrobium	(Intercept)	-2.15536	0.673258	-3.20138	0.00251032	1
tauro_w_muricholic_acid_tw_mca_ba	acetomicrobium	acetomicrobium	-882423	317578	-2.7786	0.00793616	1
tauro_w_muricholic_acid_tw_mca_ba	acetomicrobium	intest_surgery1	0.272202	0.909547	0.299271	0.766111	1
taurocholic_acid_tca_ba	acetomicrobium	(Intercept)	0.821231	0.36842	2.22906	0.0308474	1
taurocholic_acid_tca_ba	acetomicrobium	acetomicrobium	-398299	173785	-2.29191	0.0266426	1
taurocholic_acid_tca_ba	acetomicrobium	intest_surgery1	0.351805	0.497722	0.706829	0.483317	1
x2_hydroxybutyrate_p	acholeplasma	(Intercept)	-3.86856	0.121868	-31.7438	1.89538139776977e-32	1
x2_hydroxybutyrate_p	acholeplasma	acholeplasma	-2450.32	6335.68	-0.38675	0.700764	1
x2_hydroxybutyrate_p	acholeplasma	intest_surgery1	-0.257752	0.144879	-1.77908	0.081981	1
x3_hydroxybutyrate_p	acholeplasma	(Intercept)	-3.85816	0.215185	-17.9295	4.0415679331082e-22	1
x3_hydroxybutyrate_p	acholeplasma	acholeplasma	8550.17	11187	0.764294	0.448681	1
x3_hydroxybutyrate_p	acholeplasma	intest_surgery1	-0.210787	0.255815	-0.823983	0.414295	1
x3_hydroxyisovalerate_p	acholeplasma	(Intercept)	-4.66498	0.0339863	-137.261	1.14235073042216e-60	1
x3_hydroxyisovalerate_p	acholeplasma	acholeplasma	-1060.02	1766.88	-0.59994	0.551555	1
x3_hydroxyisovalerate_p	acholeplasma	intest_surgery1	0.0304899	0.0404034	0.754636	0.454399	1
acetate_p	acholeplasma	(Intercept)	-2.97516	0.0625362	-47.575	3.98008578758959e-40	1
acetate_p	acholeplasma	acholeplasma	3019.08	3251.13	0.928625	0.358038	1
acetate_p	acholeplasma	intest_surgery1	0.0856419	0.0743441	1.15197	0.255418	1
acetoacetate_p	acholeplasma	(Intercept)	-4.19035	0.118234	-35.4412	1.6057601026103e-34	1
acetoacetate_p	acholeplasma	acholeplasma	5379.32	6146.74	0.875151	0.386139	1
acetoacetate_p	acholeplasma	intest_surgery1	-0.0428089	0.140558	-0.304564	0.762103	1
alanine_p	acholeplasma	(Intercept)	-1.40595	0.0684678	-20.5345	1.73207782900552e-24	1
alanine_p	acholeplasma	acholeplasma	-443.473	3559.5	-0.124589	0.901404	1
alanine_p	acholeplasma	intest_surgery1	0.172319	0.0813956	2.11706	0.039816	1
citrate_p	acholeplasma	(Intercept)	-2.52211	0.0655117	-38.4987	4.35605058154775e-36	1
citrate_p	acholeplasma	acholeplasma	2453.34	3405.82	0.720337	0.475043	1
citrate_p	acholeplasma	intest_surgery1	-0.0434535	0.0778814	-0.557945	0.579647	1
creatinine_p	acholeplasma	(Intercept)	-3.85145	0.0800712	-48.1002	2.45100873775258e-40	1
creatinine_p	acholeplasma	acholeplasma	2133.86	4162.74	0.512609	0.610732	1
creatinine_p	acholeplasma	intest_surgery1	-0.114046	0.09519	-1.19809	0.237154	1
formate_p	acholeplasma	(Intercept)	-2.95311	0.0674069	-43.8102	1.50546330760494e-38	1
formate_p	acholeplasma	acholeplasma	5127.03	3504.35	1.46305	0.150404	1
formate_p	acholeplasma	intest_surgery1	0.0712065	0.0801344	0.888588	0.37895	1
glucose_p	acholeplasma	(Intercept)	1.10339	0.0421994	26.147	7.52567362537479e-29	1
glucose_p	acholeplasma	acholeplasma	2824.91	2193.86	1.28765	0.204452	1
glucose_p	acholeplasma	intest_surgery1	-0.0151823	0.0501673	-0.302633	0.763564	1
glutamine_p	acholeplasma	(Intercept)	-1.06421	0.0430545	-24.7178	8.0370514039331e-28	1
glutamine_p	acholeplasma	acholeplasma	-1502.91	2238.32	-0.671446	0.505369	1
glutamine_p	acholeplasma	intest_surgery1	0.118997	0.0511839	2.3249	0.0246468	1
glycine_p	acholeplasma	(Intercept)	-1.71513	0.0793066	-21.6266	2.0757816202662e-25	1
glycine_p	acholeplasma	acholeplasma	-5539.82	4122.99	-1.34364	0.185801	1
glycine_p	acholeplasma	intest_surgery1	0.186963	0.0942811	1.98304	0.0534866	1
histidine_p	acholeplasma	(Intercept)	-2.87797	0.0617785	-46.5853	1.00623765763267e-39	1
histidine_p	acholeplasma	acholeplasma	-2649.8	3211.74	-0.825037	0.413703	1
histidine_p	acholeplasma	intest_surgery1	0.0457461	0.0734433	0.622877	0.536509	1
isoleucine_p	acholeplasma	(Intercept)	-3.42017	0.0681975	-50.151	3.87282883802957e-41	1
isoleucine_p	acholeplasma	acholeplasma	255.467	3545.45	0.0720548	0.942878	1
isoleucine_p	acholeplasma	intest_surgery1	0.0126915	0.0810743	0.156541	0.876307	1
isopropanol_p	acholeplasma	(Intercept)	-5.10064	0.378416	-13.4789	2.08527567162747e-17	1
isopropanol_p	acholeplasma	acholeplasma	1936.48	19673.1	0.0984328	0.922026	1
isopropanol_p	acholeplasma	intest_surgery1	-0.18115	0.449868	-0.402675	0.689094	1
lactate_p	acholeplasma	(Intercept)	-0.0661625	0.0821648	-0.805241	0.424915	1
lactate_p	acholeplasma	acholeplasma	-3151.68	4271.58	-0.737825	0.464451	1
lactate_p	acholeplasma	intest_surgery1	0.0184398	0.0976789	0.18878	0.851114	1
leucine_p	acholeplasma	(Intercept)	-2.87506	0.0673712	-42.675	4.77490317822864e-38	1
leucine_p	acholeplasma	acholeplasma	1821.48	3502.49	0.520052	0.605576	1
leucine_p	acholeplasma	intest_surgery1	0.019019	0.080092	0.237465	0.813374	1
lysine_p	acholeplasma	(Intercept)	-2.48857	0.0610246	-40.7797	3.50641779067947e-37	1
lysine_p	acholeplasma	acholeplasma	351.776	3172.55	0.110881	0.912204	1
lysine_p	acholeplasma	intest_surgery1	0.0291512	0.0725471	0.401825	0.689715	1
phenylalanine_p	acholeplasma	(Intercept)	-3.28011	0.0498826	-65.7567	2.31147935711775e-46	1
phenylalanine_p	acholeplasma	acholeplasma	-2690.29	2593.29	-1.0374	0.30509	1
phenylalanine_p	acholeplasma	intest_surgery1	-0.0652626	0.0593012	-1.10053	0.276955	1
pyruvate_p	acholeplasma	(Intercept)	-3.16951	0.0982663	-32.2543	9.5224817765062e-33	1
pyruvate_p	acholeplasma	acholeplasma	-2675.51	5108.67	-0.52372	0.603043	1
pyruvate_p	acholeplasma	intest_surgery1	-0.00272858	0.116821	-0.023357	0.981469	1
tryptophan_p	acholeplasma	(Intercept)	-3.4885	0.0723403	-48.2234	2.18921236451726e-40	1
tryptophan_p	acholeplasma	acholeplasma	-288.176	3760.82	-0.0766257	0.939261	1
tryptophan_p	acholeplasma	intest_surgery1	-0.0368499	0.0859993	-0.42849	0.670338	1
tyrosine_p	acholeplasma	(Intercept)	-3.24119	0.065588	-49.4175	7.42937361963206e-41	1
tyrosine_p	acholeplasma	acholeplasma	4712.51	3409.78	1.38206	0.173777	1
tyrosine_p	acholeplasma	intest_surgery1	-0.0256873	0.0779721	-0.329443	0.743349	1
valine_p	acholeplasma	(Intercept)	-1.99214	0.0561174	-35.4995	1.49508154321531e-34	1
valine_p	acholeplasma	acholeplasma	445.553	2917.43	0.152721	0.879301	1
valine_p	acholeplasma	intest_surgery1	-0.069361	0.0667133	-1.03969	0.30404	1
acetate_s	acholeplasma	(Intercept)	4.14827	0.0698668	59.3739	2.17313394595654e-44	0.538019
acetate_s	acholeplasma	acholeplasma	13697.2	3632.23	3.77102	0.000471806	0.538019
acetate_s	acholeplasma	intest_surgery1	-0.130374	0.0830588	-1.56966	0.1235	0.538019
alanine_s	acholeplasma	(Intercept)	1.29016	0.12324	10.4687	1.21436822296084e-13	1
alanine_s	acholeplasma	acholeplasma	-13025.8	6406.99	-2.03306	0.0479708	1
alanine_s	acholeplasma	intest_surgery1	0.204262	0.14651	1.39419	0.170107	1
aspartate_s	acholeplasma	(Intercept)	0.628514	0.132084	4.75843	2.04684424676367e-05	1
aspartate_s	acholeplasma	acholeplasma	-1048.74	6866.8	-0.152726	0.879297	1
aspartate_s	acholeplasma	intest_surgery1	-0.320416	0.157024	-2.04056	0.0471882	1
butyrate_s	acholeplasma	(Intercept)	2.23634	0.147605	15.1508	2.7442421630792e-19	0.110719
butyrate_s	acholeplasma	acholeplasma	37125.5	7673.7	4.83802	1.57439221517946e-05	0.110719
butyrate_s	acholeplasma	intest_surgery1	-0.371569	0.175476	-2.11749	0.0397772	0.110719
formate_s	acholeplasma	(Intercept)	-1.08453	0.19262	-5.6304	1.10079917335536e-06	1
formate_s	acholeplasma	acholeplasma	-13784.5	10013.9	-1.37653	0.175467	1
formate_s	acholeplasma	intest_surgery1	0.131643	0.22899	0.574886	0.568232	1
glucose_s	acholeplasma	(Intercept)	2.04732	0.184468	11.0985	1.79779861610303e-14	1
glucose_s	acholeplasma	acholeplasma	-1207.55	9590.11	-0.125916	0.900359	1
glucose_s	acholeplasma	intest_surgery1	0.105187	0.219298	0.479653	0.633797	1
glutamate_s	acholeplasma	(Intercept)	1.34469	0.163975	8.2006	1.76311506057782e-10	1
glutamate_s	acholeplasma	acholeplasma	3976.3	8524.72	0.466444	0.643148	1
glutamate_s	acholeplasma	intest_surgery1	-0.287703	0.194936	-1.47588	0.146939	1
glutamine_s	acholeplasma	(Intercept)	0.532439	0.132135	4.02951	0.000212775	1
glutamine_s	acholeplasma	acholeplasma	2702.46	6869.41	0.393405	0.695878	1
glutamine_s	acholeplasma	intest_surgery1	-0.294056	0.157084	-1.87196	0.0677193	1
histidine_s	acholeplasma	(Intercept)	-0.432828	0.164439	-2.63215	0.0115829	1
histidine_s	acholeplasma	acholeplasma	-8453.87	8548.87	-0.988887	0.328006	1
histidine_s	acholeplasma	intest_surgery1	0.099817	0.195488	0.510603	0.612125	1
isoleucine_s	acholeplasma	(Intercept)	0.812448	0.121054	6.71144	2.73298940978898e-08	1
isoleucine_s	acholeplasma	acholeplasma	-4401.17	6293.36	-0.699336	0.487941	1
isoleucine_s	acholeplasma	intest_surgery1	-0.0750093	0.143911	-0.52122	0.60477	1
lactate_s	acholeplasma	(Intercept)	0.789556	0.165553	4.7692	1.97559005560192e-05	1
lactate_s	acholeplasma	acholeplasma	-4839.33	8606.78	-0.56227	0.576723	1
lactate_s	acholeplasma	intest_surgery1	-0.00977153	0.196813	-0.0496489	0.960622	1
leucine_s	acholeplasma	(Intercept)	1.14357	0.141583	8.07707	2.66323255779087e-10	1
leucine_s	acholeplasma	acholeplasma	-5123.52	7360.6	-0.696074	0.489962	1
leucine_s	acholeplasma	intest_surgery1	-0.0138323	0.168316	-0.0821805	0.934868	1
methylamine_s	acholeplasma	(Intercept)	-1.46563	0.27006	-5.42707	2.19311765669989e-06	1
methylamine_s	acholeplasma	acholeplasma	17535.8	14039.9	1.249	0.218124	1
methylamine_s	acholeplasma	intest_surgery1	-0.879131	0.321052	-2.73828	0.00881668	1
phenylalanine_s	acholeplasma	(Intercept)	0.635451	0.129273	4.91557	1.21786802666347e-05	1
phenylalanine_s	acholeplasma	acholeplasma	-9738.09	6720.64	-1.44898	0.154276	1
phenylalanine_s	acholeplasma	intest_surgery1	0.0999218	0.153682	0.650186	0.518878	1
propionate_s	acholeplasma	(Intercept)	3.11562	0.10117	30.796	6.99154122360145e-32	1
propionate_s	acholeplasma	acholeplasma	-189.312	5259.6	-0.0359936	0.971447	1
propionate_s	acholeplasma	intest_surgery1	-0.0193862	0.120272	-0.161186	0.872668	1
succinate_s	acholeplasma	(Intercept)	0.472497	0.568707	0.830827	0.410458	1
succinate_s	acholeplasma	acholeplasma	-55880	29565.9	-1.89001	0.0652075	1
succinate_s	acholeplasma	intest_surgery1	0.736435	0.676088	1.08926	0.281839	1
trimethylamine_s	acholeplasma	(Intercept)	-1.72662	0.176452	-9.78524	1.02201810939135e-12	1
trimethylamine_s	acholeplasma	acholeplasma	-6586.72	9173.36	-0.718027	0.476452	1
trimethylamine_s	acholeplasma	intest_surgery1	0.107804	0.209769	0.513921	0.609822	1
tyrosine_s	acholeplasma	(Intercept)	0.670494	0.118118	5.67648	9.41163726064543e-07	1
tyrosine_s	acholeplasma	acholeplasma	-5696.28	6140.71	-0.927626	0.35855	1
tyrosine_s	acholeplasma	intest_surgery1	-0.0196895	0.140421	-0.140218	0.889113	1
valine_s	acholeplasma	(Intercept)	1.3303	0.151792	8.76399	2.7378843603157e-11	1
valine_s	acholeplasma	acholeplasma	-7918.93	7891.37	-1.00349	0.320989	1
valine_s	acholeplasma	intest_surgery1	-0.0161932	0.180453	-0.0897365	0.928895	1
lithocholenic_acid_ba	acholeplasma	(Intercept)	2.97088	0.543049	5.47075	1.89180013542645e-06	1
lithocholenic_acid_ba	acholeplasma	acholeplasma	45570.8	28232	1.61415	0.113485	1
lithocholenic_acid_ba	acholeplasma	intest_surgery1	-1.79293	0.645585	-2.77721	0.00796516	1
isolithocholic_acid_ba	acholeplasma	(Intercept)	5.71563	0.469078	12.1848	7.51842048893172e-16	1
isolithocholic_acid_ba	acholeplasma	acholeplasma	56716.4	24386.4	2.32574	0.0245978	1
isolithocholic_acid_ba	acholeplasma	intest_surgery1	-1.85772	0.557648	-3.33134	0.00173378	1
allolithocholic_acid_ba	acholeplasma	(Intercept)	0.931919	0.456798	2.04011	0.0472341	1
allolithocholic_acid_ba	acholeplasma	acholeplasma	60533.2	23748	2.54898	0.0142839	1
allolithocholic_acid_ba	acholeplasma	intest_surgery1	-1.337	0.543049	-2.46203	0.0177111	1
x3a_12a_23_nordeoxycholic_acid_ba	acholeplasma	(Intercept)	-3.34676	0.545317	-6.13727	1.95245831007607e-07	1
x3a_12a_23_nordeoxycholic_acid_ba	acholeplasma	acholeplasma	23457.8	28349.9	0.827436	0.412356	1
x3a_12a_23_nordeoxycholic_acid_ba	acholeplasma	intest_surgery1	-0.148382	0.648282	-0.228885	0.819995	1
x3_6_diketocholanic_acid_ba	acholeplasma	(Intercept)	2.46988	0.470914	5.24486	4.05394578950725e-06	1
x3_6_diketocholanic_acid_ba	acholeplasma	acholeplasma	9882.54	24481.9	0.403668	0.688369	1
x3_6_diketocholanic_acid_ba	acholeplasma	intest_surgery1	-0.629101	0.559831	-1.12373	0.267085	1
x8_14_5b_cholenic_acid_3a_12a_diol_ba	acholeplasma	(Intercept)	4.10968	0.724378	5.67339	9.51114582486831e-07	1
x8_14_5b_cholenic_acid_3a_12a_diol_ba	acholeplasma	acholeplasma	75093	37658.9	1.99403	0.0522296	1
x8_14_5b_cholenic_acid_3a_12a_diol_ba	acholeplasma	intest_surgery1	-2.71904	0.861152	-3.15745	0.00284022	1
x5b_cholenic_acid_7a_ol_3_one_ba	acholeplasma	(Intercept)	3.87755	0.314703	12.3213	5.10018957544275e-16	1
x5b_cholenic_acid_7a_ol_3_one_ba	acholeplasma	acholeplasma	-15289.8	16360.8	-0.934543	0.355012	1
x5b_cholenic_acid_7a_ol_3_one_ba	acholeplasma	intest_surgery1	-0.177178	0.374124	-0.47358	0.638089	1
x5a_cholanic_acid_3a_ol_6_one_ba	acholeplasma	(Intercept)	1.98682	1.23551	1.60809	0.11481	1
x5a_cholanic_acid_3a_ol_6_one_ba	acholeplasma	acholeplasma	-32590	64231.9	-0.50738	0.614366	1
x5a_cholanic_acid_3a_ol_6_one_ba	acholeplasma	intest_surgery1	-0.877182	1.4688	-0.59721	0.55336	1
x3a_hydroxy_12_ketolithocholic_acid_ba	acholeplasma	(Intercept)	3.35671	0.613568	5.47081	1.89143838219086e-06	1
x3a_hydroxy_12_ketolithocholic_acid_ba	acholeplasma	acholeplasma	-95326.5	31898.2	-2.98846	0.00452979	1
x3a_hydroxy_12_ketolithocholic_acid_ba	acholeplasma	intest_surgery1	1.72612	0.72942	2.36643	0.0223255	1
lithocholic_acid_ba	acholeplasma	(Intercept)	5.74678	0.471405	12.1908	7.39229852699756e-16	1
lithocholic_acid_ba	acholeplasma	acholeplasma	57147.6	24507.4	2.33185	0.0242437	1
lithocholic_acid_ba	acholeplasma	intest_surgery1	-1.87223	0.560414	-3.34079	0.00168728	1
x5b_cholanic_acid_3b_12a_diol_ba	acholeplasma	(Intercept)	3.01078	0.360489	8.35192	1.06587175271759e-10	1
x5b_cholanic_acid_3b_12a_diol_ba	acholeplasma	acholeplasma	-23142.7	18741.1	-1.23486	0.223291	1
x5b_cholanic_acid_3b_12a_diol_ba	acholeplasma	intest_surgery1	0.08072	0.428556	0.188354	0.851446	1
chenodeoxycholic_acid_cdca_ba	acholeplasma	(Intercept)	3.79393	0.950938	3.98967	0.000240885	1
chenodeoxycholic_acid_cdca_ba	acholeplasma	acholeplasma	-45781.2	49437.3	-0.926045	0.359363	1
chenodeoxycholic_acid_cdca_ba	acholeplasma	intest_surgery1	2.29787	1.13049	2.03263	0.0480162	1
deoxycholic_acid_dca_ba	acholeplasma	(Intercept)	5.35499	0.989336	5.41271	2.3021854255075e-06	1
deoxycholic_acid_dca_ba	acholeplasma	acholeplasma	127564	51433.6	2.48018	0.0169398	1
deoxycholic_acid_dca_ba	acholeplasma	intest_surgery1	-4.0646	1.17614	-3.45588	0.00120816	1
hyodeoxycholic_acid_ba	acholeplasma	(Intercept)	4.67394	0.381793	12.2421	6.38730362697825e-16	1
hyodeoxycholic_acid_ba	acholeplasma	acholeplasma	-1481.89	19848.7	-0.0746594	0.940817	1
hyodeoxycholic_acid_ba	acholeplasma	intest_surgery1	-0.373384	0.453882	-0.822645	0.415048	1
isodeoxycholic_acid_ba	acholeplasma	(Intercept)	-3.20948	0.907529	-3.5365	0.000953149	1
isodeoxycholic_acid_ba	acholeplasma	acholeplasma	72775.9	47180.6	1.5425	0.129957	1
isodeoxycholic_acid_ba	acholeplasma	intest_surgery1	-1.37244	1.07889	-1.27209	0.209877	1
murocholic_acid_muro_ca_ba	acholeplasma	(Intercept)	2.35979	0.878914	2.6849	0.0101213	1
murocholic_acid_muro_ca_ba	acholeplasma	acholeplasma	-29927.1	45693	-0.654962	0.515827	1
murocholic_acid_muro_ca_ba	acholeplasma	intest_surgery1	0.390816	1.04487	0.374034	0.710136	1
ursodeoxycholic_acid_udca_ba	acholeplasma	(Intercept)	3.94629	0.406908	9.69825	1.34589912147039e-12	1
ursodeoxycholic_acid_udca_ba	acholeplasma	acholeplasma	-40755	21154.3	-1.92656	0.0603648	1
ursodeoxycholic_acid_udca_ba	acholeplasma	intest_surgery1	0.635566	0.483739	1.31386	0.195552	1
x3a_hydroxy_7_12_diketo_cholanic_acid_ba	acholeplasma	(Intercept)	-1.16972	0.489439	-2.38991	0.0211013	1
x3a_hydroxy_7_12_diketo_cholanic_acid_ba	acholeplasma	acholeplasma	-54061.7	25444.9	-2.12466	0.0391422	1
x3a_hydroxy_7_12_diketo_cholanic_acid_ba	acholeplasma	intest_surgery1	0.462881	0.581853	0.79553	0.430482	1
x5b_cholanic_acid_3a_6a_diol_7_one_ba	acholeplasma	(Intercept)	-1.58372	0.47635	-3.3247	0.00176718	1
x5b_cholanic_acid_3a_6a_diol_7_one_ba	acholeplasma	acholeplasma	2019.77	24764.5	0.0815592	0.935359	1
x5b_cholanic_acid_3a_6a_diol_7_one_ba	acholeplasma	intest_surgery1	-0.38589	0.566293	-0.681432	0.49909	1
x3_dehydrocholic_acid_ba	acholeplasma	(Intercept)	1.6857	0.674622	2.49874	0.0161824	1
x3_dehydrocholic_acid_ba	acholeplasma	acholeplasma	-114350	35072.2	-3.26041	0.00212378	1
x3_dehydrocholic_acid_ba	acholeplasma	intest_surgery1	1.25507	0.802002	1.56492	0.124606	1
cholic_acid_ca_ba	acholeplasma	(Intercept)	5.02295	0.587733	8.54631	5.60145463001806e-11	0.869932
cholic_acid_ca_ba	acholeplasma	acholeplasma	-105483	30555.1	-3.45223	0.0012211	0.869932
cholic_acid_ca_ba	acholeplasma	intest_surgery1	1.38678	0.698707	1.98478	0.0532858	0.869932
hyocholic_acid_hca_ba	acholeplasma	(Intercept)	0.982945	0.280996	3.49807	0.00106752	1
hyocholic_acid_hca_ba	acholeplasma	acholeplasma	-14803.3	14608.4	-1.01334	0.316317	1
hyocholic_acid_hca_ba	acholeplasma	intest_surgery1	-0.139635	0.334053	-0.418003	0.677933	1
glycoursocholanic_acid_ba	acholeplasma	(Intercept)	-5.63065	0.563941	-9.98447	5.459735921955e-13	1
glycoursocholanic_acid_ba	acholeplasma	acholeplasma	23285.2	29318.1	0.794225	0.431233	1
glycoursocholanic_acid_ba	acholeplasma	intest_surgery1	0.78536	0.670422	1.17144	0.247587	1
glycolithocholic_acid_glca_ba	acholeplasma	(Intercept)	-2.07526	0.422203	-4.91531	1.21895660692181e-05	1
glycolithocholic_acid_glca_ba	acholeplasma	acholeplasma	5844.54	21949.5	0.266272	0.791246	1
glycolithocholic_acid_glca_ba	acholeplasma	intest_surgery1	-0.129807	0.501922	-0.25862	0.797107	1
glycoursodeoxycholic_acid_gudca_ba	acholeplasma	(Intercept)	-2.00309	0.784571	-2.5531	0.0141376	1
glycoursodeoxycholic_acid_gudca_ba	acholeplasma	acholeplasma	-80778	40788.3	-1.98042	0.0537893	1
glycoursodeoxycholic_acid_gudca_ba	acholeplasma	intest_surgery1	-0.27287	0.932711	-0.292556	0.771206	1
glycochenodeoxycholic_acid_gcdca_ba	acholeplasma	(Intercept)	1.53932	0.318843	4.82784	1.62823096810773e-05	1
glycochenodeoxycholic_acid_gcdca_ba	acholeplasma	acholeplasma	-26688.7	16576	-1.61008	0.114373	1
glycochenodeoxycholic_acid_gcdca_ba	acholeplasma	intest_surgery1	0.506219	0.379045	1.33551	0.188426	1
glycodeoxycholic_acid_gdca_ba	acholeplasma	(Intercept)	0.0863059	0.568311	0.151864	0.879973	1
glycodeoxycholic_acid_gdca_ba	acholeplasma	acholeplasma	37028.3	29545.3	1.25327	0.21658	1
glycodeoxycholic_acid_gdca_ba	acholeplasma	intest_surgery1	-1.68595	0.675618	-2.49542	0.0163156	1
glycocholic_acid_gca_ba	acholeplasma	(Intercept)	0.730333	0.317718	2.29868	0.0262213	1
glycocholic_acid_gca_ba	acholeplasma	acholeplasma	-34351.1	16517.5	-2.07968	0.0432815	1
glycocholic_acid_gca_ba	acholeplasma	intest_surgery1	0.490018	0.377708	1.29734	0.201125	1
taurolithocholic_acid_tlca_ba	acholeplasma	(Intercept)	-1.14391	0.680029	-1.68215	0.0994673	1
taurolithocholic_acid_tlca_ba	acholeplasma	acholeplasma	-21246.7	35353.3	-0.600983	0.550867	1
taurolithocholic_acid_tlca_ba	acholeplasma	intest_surgery1	-1.61814	0.80843	-2.00159	0.0513805	1
taurochenodeoxycholic_acid_tcdca_ba	acholeplasma	(Intercept)	0.192007	0.470195	0.408356	0.684949	1
taurochenodeoxycholic_acid_tcdca_ba	acholeplasma	acholeplasma	-27035.5	24444.5	-1.106	0.274606	1
taurochenodeoxycholic_acid_tcdca_ba	acholeplasma	intest_surgery1	0.175772	0.558975	0.314453	0.75463	1
taurodeoxycholic_acid_tdca_ba	acholeplasma	(Intercept)	0.127884	0.625096	0.204582	0.838821	1
taurodeoxycholic_acid_tdca_ba	acholeplasma	acholeplasma	-5887.89	32497.5	-0.18118	0.85704	1
taurodeoxycholic_acid_tdca_ba	acholeplasma	intest_surgery1	-2.33231	0.743124	-3.13851	0.00299465	1
tauro_w_muricholic_acid_tw_mca_ba	acholeplasma	(Intercept)	-1.31843	0.725351	-1.81764	0.07578	0.604295
tauro_w_muricholic_acid_tw_mca_ba	acholeplasma	acholeplasma	-139505	37709.5	-3.69946	0.000585925	0.604295
tauro_w_muricholic_acid_tw_mca_ba	acholeplasma	intest_surgery1	0.327811	0.862309	0.380154	0.705619	0.604295
taurocholic_acid_tca_ba	acholeplasma	(Intercept)	1.20356	0.403526	2.98261	0.00460257	1
taurocholic_acid_tca_ba	acholeplasma	acholeplasma	-63368.1	20978.5	-3.02062	0.00414899	1
taurocholic_acid_tca_ba	acholeplasma	intest_surgery1	0.377131	0.479719	0.786151	0.435899	1
x2_hydroxybutyrate_p	achromobacter	(Intercept)	-3.88802	0.133149	-29.2006	6.85029083833353e-31	1
x2_hydroxybutyrate_p	achromobacter	achromobacter	-162.182	1708.65	-0.0949186	0.924801	1
x2_hydroxybutyrate_p	achromobacter	intest_surgery1	-0.26066	0.145941	-1.78607	0.0808276	1
x3_hydroxybutyrate_p	achromobacter	(Intercept)	-3.91575	0.233756	-16.7514	5.82508622433732e-21	1
x3_hydroxybutyrate_p	achromobacter	achromobacter	2950.37	2999.7	0.983554	0.330594	1
x3_hydroxybutyrate_p	achromobacter	intest_surgery1	-0.1783	0.256214	-0.695904	0.490068	1
x3_hydroxyisovalerate_p	achromobacter	(Intercept)	-4.65627	0.0369375	-126.058	5.21776890759768e-59	1
x3_hydroxyisovalerate_p	achromobacter	achromobacter	-395.539	474.006	-0.834461	0.408429	1
x3_hydroxyisovalerate_p	achromobacter	intest_surgery1	0.0261834	0.0404863	0.646723	0.521097	1
acetate_p	achromobacter	(Intercept)	-2.93705	0.0688641	-42.65	4.89949373671745e-38	1
acetate_p	achromobacter	achromobacter	-68.7643	883.708	-0.0778134	0.938321	1
acetate_p	achromobacter	intest_surgery1	0.0867091	0.0754803	1.14876	0.256723	1
acetoacetate_p	achromobacter	(Intercept)	-4.24801	0.127384	-33.348	2.25259014094763e-33	1
acetoacetate_p	achromobacter	achromobacter	2263.45	1634.67	1.38465	0.172988	1
acetoacetate_p	achromobacter	intest_surgery1	-0.0185548	0.139623	-0.132893	0.894871	1
alanine_p	achromobacter	(Intercept)	-1.36971	0.0741429	-18.4739	1.23152026649974e-22	1
alanine_p	achromobacter	achromobacter	-785.042	951.449	-0.825102	0.413667	1
alanine_p	achromobacter	intest_surgery1	0.164713	0.0812662	2.02684	0.0486288	1
citrate_p	achromobacter	(Intercept)	-2.49844	0.0718685	-34.7641	3.71244948035902e-34	1
citrate_p	achromobacter	achromobacter	82.7644	922.262	0.0897407	0.928892	1
citrate_p	achromobacter	intest_surgery1	-0.0412875	0.0787733	-0.524131	0.60276	1
creatinine_p	achromobacter	(Intercept)	-3.87037	0.087078	-44.4472	7.97644230102442e-39	1
creatinine_p	achromobacter	achromobacter	822.895	1117.44	0.73641	0.465303	1
creatinine_p	achromobacter	intest_surgery1	-0.105127	0.0954441	-1.10146	0.276555	1
formate_p	achromobacter	(Intercept)	-2.89652	0.0752588	-38.4875	4.41185767755484e-36	1
formate_p	achromobacter	achromobacter	37.4757	965.768	0.038804	0.969218	1
formate_p	achromobacter	intest_surgery1	0.0744638	0.0824893	0.902709	0.371487	1
glucose_p	achromobacter	(Intercept)	1.10213	0.0462861	23.8113	3.84164188267217e-27	1
glucose_p	achromobacter	achromobacter	637.102	593.972	1.07261	0.289164	1
glucose_p	achromobacter	intest_surgery1	-0.0076124	0.050733	-0.150048	0.881397	1
glutamine_p	achromobacter	(Intercept)	-1.0698	0.0471318	-22.6979	2.81790610567535e-26	1
glutamine_p	achromobacter	achromobacter	-220.126	604.826	-0.363949	0.7176	1
glutamine_p	achromobacter	intest_surgery1	0.116083	0.0516601	2.24706	0.0295866	1
glycine_p	achromobacter	(Intercept)	-1.76303	0.0881654	-19.9968	5.09384585970921e-24	1
glycine_p	achromobacter	achromobacter	-292.352	1131.39	-0.258399	0.797277	1
glycine_p	achromobacter	intest_surgery1	0.181084	0.096636	1.87388	0.0674495	1
histidine_p	achromobacter	(Intercept)	-2.82992	0.0656613	-43.0988	3.09283029984855e-38	1
histidine_p	achromobacter	achromobacter	-1488.37	842.607	-1.76639	0.0841142	1
histidine_p	achromobacter	intest_surgery1	0.0303005	0.0719697	0.421017	0.675747	1
isoleucine_p	achromobacter	(Intercept)	-3.39943	0.0742941	-45.7564	2.22074244332365e-39	1
isoleucine_p	achromobacter	achromobacter	-338.736	953.389	-0.355297	0.724027	1
isoleucine_p	achromobacter	intest_surgery1	0.00966288	0.081432	0.118662	0.906071	1
isopropanol_p	achromobacter	(Intercept)	-5.0199	0.412641	-12.1653	7.94940481108585e-16	1
isopropanol_p	achromobacter	achromobacter	-1114.01	5295.27	-0.210378	0.834322	1
isopropanol_p	achromobacter	intest_surgery1	-0.190489	0.452286	-0.42117	0.675636	1
lactate_p	achromobacter	(Intercept)	-0.000838949	0.0873524	-0.00960418	0.99238	1
lactate_p	achromobacter	achromobacter	-1925.53	1120.96	-1.71774	0.0927184	1
lactate_p	achromobacter	intest_surgery1	-0.00138575	0.0957449	-0.0144734	0.988516	1
leucine_p	achromobacter	(Intercept)	-2.827	0.073467	-38.4798	4.45032556076095e-36	1
leucine_p	achromobacter	achromobacter	-518.034	942.775	-0.549478	0.585394	1
leucine_p	achromobacter	intest_surgery1	0.0151984	0.0805254	0.18874	0.851145	1
lysine_p	achromobacter	(Intercept)	-2.45711	0.0663024	-37.0592	2.29901367674457e-35	1
lysine_p	achromobacter	achromobacter	-521.368	850.834	-0.612773	0.543111	1
lysine_p	achromobacter	intest_surgery1	0.0244662	0.0726724	0.336665	0.737935	1
phenylalanine_p	achromobacter	(Intercept)	-3.26197	0.0539946	-60.413	1.00494213884049e-44	1
phenylalanine_p	achromobacter	achromobacter	-928.675	692.892	-1.34029	0.18688	1
phenylalanine_p	achromobacter	intest_surgery1	-0.0754877	0.0591821	-1.27552	0.208672	1
pyruvate_p	achromobacter	(Intercept)	-3.14046	0.106713	-29.4292	4.90621339964443e-31	1
pyruvate_p	achromobacter	achromobacter	-1132.84	1369.4	-0.827248	0.412462	1
pyruvate_p	achromobacter	intest_surgery1	-0.014858	0.116965	-0.12703	0.899483	1
tryptophan_p	achromobacter	(Intercept)	-3.47512	0.0788325	-44.0824	1.14640489557792e-38	1
tryptophan_p	achromobacter	achromobacter	-316.729	1011.63	-0.313089	0.75566	1
tryptophan_p	achromobacter	intest_surgery1	-0.0399805	0.0864063	-0.462703	0.645807	1
tyrosine_p	achromobacter	(Intercept)	-3.21575	0.0727806	-44.1843	1.03565933148416e-38	1
tyrosine_p	achromobacter	achromobacter	539.571	933.966	0.57772	0.566333	1
tyrosine_p	achromobacter	intest_surgery1	-0.0179612	0.079773	-0.225154	0.822879	1
valine_p	achromobacter	(Intercept)	-1.98063	0.0612157	-32.3549	8.32430038687761e-33	1
valine_p	achromobacter	achromobacter	-121.964	785.559	-0.155257	0.877313	1
valine_p	achromobacter	intest_surgery1	-0.070251	0.0670971	-1.04701	0.300688	1
acetate_s	achromobacter	(Intercept)	4.188	0.0835484	50.1266	3.95700606439185e-41	1
acetate_s	achromobacter	achromobacter	2218.25	1072.15	2.06898	0.0443206	1
acetate_s	achromobacter	intest_surgery1	-0.101828	0.0915754	-1.11196	0.27206	1
alanine_s	achromobacter	(Intercept)	1.22401	0.139287	8.78771	2.53314471701782e-11	1
alanine_s	achromobacter	achromobacter	-1570.36	1787.41	-0.878565	0.384304	1
alanine_s	achromobacter	intest_surgery1	0.182166	0.152669	1.19321	0.239038	1
aspartate_s	achromobacter	(Intercept)	0.565146	0.143676	3.93348	0.000286719	1
aspartate_s	achromobacter	achromobacter	976.579	1843.74	0.529673	0.598942	1
aspartate_s	achromobacter	intest_surgery1	-0.311862	0.157479	-1.98033	0.0537998	1
butyrate_s	achromobacter	(Intercept)	2.34388	0.18582	12.6137	2.23871605106023e-16	1
butyrate_s	achromobacter	achromobacter	6015.22	2384.56	2.52257	0.0152551	1
butyrate_s	achromobacter	intest_surgery1	-0.294172	0.203673	-1.44433	0.155572	1
formate_s	achromobacter	(Intercept)	-1.05806	0.210622	-5.02351	8.50616540551845e-06	1
formate_s	achromobacter	achromobacter	-3495.18	2702.84	-1.29315	0.202558	1
formate_s	achromobacter	intest_surgery1	0.0910854	0.230858	0.394551	0.695038	1
glucose_s	achromobacter	(Intercept)	2.18651	0.19841	11.0201	2.27399726342938e-14	1
glucose_s	achromobacter	achromobacter	-2907.22	2546.13	-1.14182	0.259569	1
glucose_s	achromobacter	intest_surgery1	0.0772666	0.217473	0.355293	0.72403	1
glutamate_s	achromobacter	(Intercept)	1.20276	0.17447	6.89378	1.46474497843771e-08	1
glutamate_s	achromobacter	achromobacter	3560.39	2238.91	1.59023	0.118785	1
glutamate_s	achromobacter	intest_surgery1	-0.252094	0.191233	-1.31826	0.194089	1
glutamine_s	achromobacter	(Intercept)	0.602199	0.144133	4.17809	0.000133425	1
glutamine_s	achromobacter	achromobacter	-739.071	1849.6	-0.399584	0.691353	1
glutamine_s	achromobacter	intest_surgery1	-0.299448	0.15798	-1.89547	0.0644635	1
histidine_s	achromobacter	(Intercept)	-0.400621	0.179077	-2.23715	0.0302749	1
histidine_s	achromobacter	achromobacter	-2447.14	2298.02	-1.06489	0.292607	1
histidine_s	achromobacter	intest_surgery1	0.0720991	0.196282	0.367325	0.715098	1
isoleucine_s	achromobacter	(Intercept)	0.663107	0.130955	5.06362	7.44082436233407e-06	1
isoleucine_s	achromobacter	achromobacter	1882.65	1680.5	1.12029	0.268532	1
isoleucine_s	achromobacter	intest_surgery1	-0.0598666	0.143537	-0.417082	0.678601	1
lactate_s	achromobacter	(Intercept)	0.653771	0.180355	3.62491	0.00073289	1
lactate_s	achromobacter	achromobacter	1529.94	2314.43	0.661044	0.511954	1
lactate_s	achromobacter	intest_surgery1	0.00181845	0.197683	0.00919882	0.992701	1
leucine_s	achromobacter	(Intercept)	0.964094	0.152963	6.30278	1.10785566446353e-07	1
leucine_s	achromobacter	achromobacter	2298.61	1962.92	1.17102	0.247756	1
leucine_s	achromobacter	intest_surgery1	0.00479777	0.167659	0.0286162	0.977297	1
methylamine_s	achromobacter	(Intercept)	-1.5782	0.291592	-5.41236	2.3049234645541e-06	1
methylamine_s	achromobacter	achromobacter	5945.7	3741.9	1.58895	0.119073	1
methylamine_s	achromobacter	intest_surgery1	-0.813489	0.319607	-2.54528	0.0144166	1
phenylalanine_s	achromobacter	(Intercept)	0.48814	0.144051	3.38866	0.00146935	1
phenylalanine_s	achromobacter	achromobacter	685.586	1848.55	0.370877	0.712469	1
phenylalanine_s	achromobacter	intest_surgery1	0.100825	0.157891	0.638572	0.526338	1
propionate_s	achromobacter	(Intercept)	3.00841	0.1079	27.8816	4.92848235870181e-30	1
propionate_s	achromobacter	achromobacter	1996.26	1384.64	1.44172	0.156305	1
propionate_s	achromobacter	intest_surgery1	-0.000791778	0.118266	-0.00669488	0.994688	1
succinate_s	achromobacter	(Intercept)	0.995768	0.591328	1.68395	0.0991163	1
succinate_s	achromobacter	achromobacter	-22074	7588.29	-2.90895	0.00561629	1
succinate_s	achromobacter	intest_surgery1	0.497962	0.64814	0.768293	0.446326	1
trimethylamine_s	achromobacter	(Intercept)	-1.86055	0.193149	-9.63268	1.65725393971598e-12	1
trimethylamine_s	achromobacter	achromobacter	1115.3	2478.62	0.449971	0.654892	1
trimethylamine_s	achromobacter	intest_surgery1	0.114519	0.211706	0.540935	0.59122	1
tyrosine_s	achromobacter	(Intercept)	0.4737	0.126784	3.73627	0.000524253	1
tyrosine_s	achromobacter	achromobacter	2503.33	1626.97	1.53864	0.130895	1
tyrosine_s	achromobacter	intest_surgery1	0.000533782	0.138965	0.00384113	0.996952	1
valine_s	achromobacter	(Intercept)	1.13393	0.165786	6.83972	1.76208139916121e-08	1
valine_s	achromobacter	achromobacter	2012.91	2127.47	0.946154	0.349123	1
valine_s	achromobacter	intest_surgery1	-0.00182427	0.181714	-0.0100392	0.992034	1
lithocholenic_acid_ba	achromobacter	(Intercept)	2.67012	0.581697	4.59022	3.550659865121e-05	1
lithocholenic_acid_ba	achromobacter	achromobacter	15607.7	7464.71	2.09087	0.0422174	1
lithocholenic_acid_ba	achromobacter	intest_surgery1	-1.62088	0.637584	-2.54221	0.0145271	1
isolithocholic_acid_ba	achromobacter	(Intercept)	5.62087	0.516172	10.8895	3.36947342839186e-14	1
isolithocholic_acid_ba	achromobacter	achromobacter	14112.2	6623.84	2.13052	0.0386289	1
isolithocholic_acid_ba	achromobacter	intest_surgery1	-1.69336	0.565763	-2.99305	0.00447355	1
allolithocholic_acid_ba	achromobacter	(Intercept)	0.449174	0.465797	0.964314	0.340042	0.576743
allolithocholic_acid_ba	achromobacter	achromobacter	22313.9	5977.4	3.73305	0.000529393	0.576743
allolithocholic_acid_ba	achromobacter	intest_surgery1	-1.09365	0.510548	-2.1421	0.0376328	0.576743
x3a_12a_23_nordeoxycholic_acid_ba	achromobacter	(Intercept)	-3.37257	0.595855	-5.66006	9.9523893862404e-07	1
x3a_12a_23_nordeoxycholic_acid_ba	achromobacter	achromobacter	5582.48	7646.38	0.730081	0.469124	1
x3a_12a_23_nordeoxycholic_acid_ba	achromobacter	intest_surgery1	-0.0827864	0.653102	-0.126759	0.899696	1
x3_6_diketocholanic_acid_ba	achromobacter	(Intercept)	1.91866	0.493307	3.88938	0.000328504	1
x3_6_diketocholanic_acid_ba	achromobacter	achromobacter	12620.5	6330.42	1.99363	0.0522753	1
x3_6_diketocholanic_acid_ba	achromobacter	intest_surgery1	-0.505266	0.540701	-0.934463	0.355053	1
x8_14_5b_cholenic_acid_3a_12a_diol_ba	achromobacter	(Intercept)	3.95113	0.793249	4.98095	9.80130082394507e-06	1
x8_14_5b_cholenic_acid_3a_12a_diol_ba	achromobacter	achromobacter	19313.5	10179.5	1.8973	0.0642169	1
x8_14_5b_cholenic_acid_3a_12a_diol_ba	achromobacter	intest_surgery1	-2.49554	0.869461	-2.87022	0.0062296	1
x5b_cholenic_acid_7a_ol_3_one_ba	achromobacter	(Intercept)	3.59096	0.34573	10.3866	1.56365076068058e-13	1
x5b_cholenic_acid_7a_ol_3_one_ba	achromobacter	achromobacter	2127.22	4436.63	0.479467	0.633928	1
x5b_cholenic_acid_7a_ol_3_one_ba	achromobacter	intest_surgery1	-0.165916	0.378947	-0.437835	0.6636	1
x5a_cholanic_acid_3a_ol_6_one_ba	achromobacter	(Intercept)	0.427776	1.32599	0.322609	0.748486	1
x5a_cholanic_acid_3a_ol_6_one_ba	achromobacter	achromobacter	22553.1	17015.9	1.32541	0.191724	1
x5a_cholanic_acid_3a_ol_6_one_ba	achromobacter	intest_surgery1	-0.684369	1.45338	-0.47088	0.640001	1
x3a_hydroxy_12_ketolithocholic_acid_ba	achromobacter	(Intercept)	4.00308	0.624623	6.4088	7.70501014873402e-08	0.332829
x3a_hydroxy_12_ketolithocholic_acid_ba	achromobacter	achromobacter	-32976	8015.55	-4.114	0.000163303	0.332829
x3a_hydroxy_12_ketolithocholic_acid_ba	achromobacter	intest_surgery1	1.36315	0.684634	1.99107	0.052566	0.332829
lithocholic_acid_ba	achromobacter	(Intercept)	5.65038	0.518691	10.8935	3.32905871820767e-14	1
lithocholic_acid_ba	achromobacter	achromobacter	14237.1	6656.17	2.13893	0.037903	1
lithocholic_acid_ba	achromobacter	intest_surgery1	-1.70645	0.568525	-3.00155	0.00437104	1
x5b_cholanic_acid_3b_12a_diol_ba	achromobacter	(Intercept)	2.69311	0.399677	6.73822	2.4936468617878e-08	1
x5b_cholanic_acid_3b_12a_diol_ba	achromobacter	achromobacter	1013.14	5128.91	0.197535	0.844298	1
x5b_cholanic_acid_3b_12a_diol_ba	achromobacter	intest_surgery1	0.0770932	0.438077	0.175981	0.861098	1
chenodeoxycholic_acid_cdca_ba	achromobacter	(Intercept)	4.962	0.978379	5.07165	7.24379487407191e-06	1
chenodeoxycholic_acid_cdca_ba	achromobacter	achromobacter	-32135.4	12555.2	-2.55954	0.0139118	1
chenodeoxycholic_acid_cdca_ba	achromobacter	intest_surgery1	1.97086	1.07238	1.83784	0.0726934	1
deoxycholic_acid_dca_ba	achromobacter	(Intercept)	5.93395	1.13418	5.23193	4.23396176953226e-06	1
deoxycholic_acid_dca_ba	achromobacter	achromobacter	16688.1	14554.5	1.14659	0.257611	1
deoxycholic_acid_dca_ba	achromobacter	intest_surgery1	-3.83595	1.24315	-3.08567	0.00346858	1
hyodeoxycholic_acid_ba	achromobacter	(Intercept)	4.46939	0.414445	10.7841	4.63669037170683e-14	1
hyodeoxycholic_acid_ba	achromobacter	achromobacter	3565.49	5318.41	0.670405	0.506026	1
hyodeoxycholic_acid_ba	achromobacter	intest_surgery1	-0.340821	0.454263	-0.750273	0.456995	1
isodeoxycholic_acid_ba	achromobacter	(Intercept)	-3.43053	0.988901	-3.46904	0.00116251	1
isodeoxycholic_acid_ba	achromobacter	achromobacter	19998.4	12690.2	1.57589	0.122055	1
isodeoxycholic_acid_ba	achromobacter	intest_surgery1	-1.14383	1.08391	-1.05528	0.296929	1
murocholic_acid_muro_ca_ba	achromobacter	(Intercept)	1.70544	0.960858	1.77492	0.0826763	1
murocholic_acid_muro_ca_ba	achromobacter	achromobacter	5938.81	12330.3	0.481643	0.632394	1
murocholic_acid_muro_ca_ba	achromobacter	intest_surgery1	0.429489	1.05317	0.407805	0.685351	1
ursodeoxycholic_acid_udca_ba	achromobacter	(Intercept)	3.8786	0.453395	8.55456	5.45109355094517e-11	1
ursodeoxycholic_acid_udca_ba	achromobacter	achromobacter	-7560.2	5818.25	-1.29939	0.200427	1
ursodeoxycholic_acid_udca_ba	achromobacter	intest_surgery1	0.541637	0.496955	1.08991	0.281555	1
x3a_hydroxy_7_12_diketo_cholanic_acid_ba	achromobacter	(Intercept)	-1.35747	0.551954	-2.45939	0.017826	1
x3a_hydroxy_7_12_diketo_cholanic_acid_ba	achromobacter	achromobacter	-8167.19	7083.02	-1.15307	0.254972	1
x3a_hydroxy_7_12_diketo_cholanic_acid_ba	achromobacter	intest_surgery1	0.355723	0.604984	0.587989	0.559479	1
x5b_cholanic_acid_3a_6a_diol_7_one_ba	achromobacter	(Intercept)	-2.39764	0.485712	-4.93634	1.13678240528139e-05	1
x5b_cholanic_acid_3a_6a_diol_7_one_ba	achromobacter	achromobacter	15905.8	6232.96	2.55189	0.0141805	1
x5b_cholanic_acid_3a_6a_diol_7_one_ba	achromobacter	intest_surgery1	-0.235733	0.532377	-0.442793	0.660037	1
x3_dehydrocholic_acid_ba	achromobacter	(Intercept)	2.21814	0.71047	3.12207	0.00313518	0.493125
x3_dehydrocholic_acid_ba	achromobacter	achromobacter	-34940.3	9117.2	-3.83234	0.000391336	0.493125
x3_dehydrocholic_acid_ba	achromobacter	intest_surgery1	0.862921	0.778729	1.10811	0.2737	0.493125
cholic_acid_ca_ba	achromobacter	(Intercept)	5.43298	0.626755	8.66843	3.74644854658873e-11	0.504909
cholic_acid_ca_ba	achromobacter	achromobacter	-30689.5	8042.91	-3.81572	0.000411743	0.504909
cholic_acid_ca_ba	achromobacter	intest_surgery1	1.03948	0.686971	1.51313	0.137239	0.504909
hyocholic_acid_hca_ba	achromobacter	(Intercept)	0.971281	0.308051	3.15298	0.00287594	1
hyocholic_acid_hca_ba	achromobacter	achromobacter	-2991.69	3953.11	-0.756795	0.453117	1
hyocholic_acid_hca_ba	achromobacter	intest_surgery1	-0.176054	0.337648	-0.521413	0.604636	1
glycoursocholanic_acid_ba	achromobacter	(Intercept)	-5.08794	0.616457	-8.25352	1.47820807171135e-10	1
glycoursocholanic_acid_ba	achromobacter	achromobacter	-5258.85	7910.77	-0.664771	0.50959	1
glycoursocholanic_acid_ba	achromobacter	intest_surgery1	0.749292	0.675684	1.10894	0.273348	1
glycolithocholic_acid_glca_ba	achromobacter	(Intercept)	-2.32518	0.455595	-5.10361	6.51000952580388e-06	1
glycolithocholic_acid_glca_ba	achromobacter	achromobacter	6018.1	5846.48	1.02935	0.308814	1
glycolithocholic_acid_glca_ba	achromobacter	intest_surgery1	-0.0701144	0.499366	-0.140407	0.888965	1
glycoursodeoxycholic_acid_gudca_ba	achromobacter	(Intercept)	-1.96808	0.866969	-2.27007	0.0280416	1
glycoursodeoxycholic_acid_gudca_ba	achromobacter	achromobacter	-18199.8	11125.5	-1.63586	0.108845	1
glycoursodeoxycholic_acid_gudca_ba	achromobacter	intest_surgery1	-0.489161	0.950264	-0.514764	0.609237	1
glycochenodeoxycholic_acid_gcdca_ba	achromobacter	(Intercept)	1.60248	0.348343	4.60029	3.43598482173674e-05	1
glycochenodeoxycholic_acid_gcdca_ba	achromobacter	achromobacter	-6993.58	4470.15	-1.56451	0.124705	1
glycochenodeoxycholic_acid_gcdca_ba	achromobacter	intest_surgery1	0.425572	0.38181	1.11462	0.270932	1
glycodeoxycholic_acid_gdca_ba	achromobacter	(Intercept)	0.0709139	0.623207	0.113789	0.909911	1
glycodeoxycholic_acid_gdca_ba	achromobacter	achromobacter	8330.28	7997.38	1.04163	0.303149	1
glycodeoxycholic_acid_gdca_ba	achromobacter	intest_surgery1	-1.58692	0.683082	-2.32317	0.0247477	1
glycocholic_acid_gca_ba	achromobacter	(Intercept)	0.802416	0.348072	2.30532	0.0258146	1
glycocholic_acid_gca_ba	achromobacter	achromobacter	-8826.48	4466.68	-1.97607	0.0542965	1
glycocholic_acid_gca_ba	achromobacter	intest_surgery1	0.387856	0.381513	1.01663	0.314766	1
taurolithocholic_acid_tlca_ba	achromobacter	(Intercept)	-1.02072	0.740395	-1.37862	0.174828	1
taurolithocholic_acid_tlca_ba	achromobacter	achromobacter	-6953.12	9501.22	-0.731814	0.468076	1
taurolithocholic_acid_tlca_ba	achromobacter	intest_surgery1	-1.69532	0.811529	-2.08905	0.0423889	1
taurochenodeoxycholic_acid_tcdca_ba	achromobacter	(Intercept)	0.455738	0.504242	0.903808	0.37091	1
taurochenodeoxycholic_acid_tcdca_ba	achromobacter	achromobacter	-10880.5	6470.75	-1.68149	0.0995971	1
taurochenodeoxycholic_acid_tcdca_ba	achromobacter	intest_surgery1	0.0585142	0.552687	0.105872	0.916154	1
taurodeoxycholic_acid_tdca_ba	achromobacter	(Intercept)	0.407677	0.677825	0.601449	0.550559	1
taurodeoxycholic_acid_tdca_ba	achromobacter	achromobacter	-6595.2	8698.28	-0.758219	0.452273	1
taurodeoxycholic_acid_tdca_ba	achromobacter	intest_surgery1	-2.39743	0.742947	-3.22692	0.00233556	1
tauro_w_muricholic_acid_tw_mca_ba	achromobacter	(Intercept)	-0.873732	0.783611	-1.11501	0.270767	0.47899
tauro_w_muricholic_acid_tw_mca_ba	achromobacter	achromobacter	-38733.4	10055.8	-3.85185	0.000368646	0.47899
tauro_w_muricholic_acid_tw_mca_ba	achromobacter	intest_surgery1	-0.114136	0.858897	-0.132887	0.894875	0.47899
taurocholic_acid_tca_ba	achromobacter	(Intercept)	1.40236	0.437689	3.20402	0.00249169	1
taurocholic_acid_tca_ba	achromobacter	achromobacter	-17533.4	5616.7	-3.12165	0.00313881	1
taurocholic_acid_tca_ba	achromobacter	intest_surgery1	0.176952	0.47974	0.36885	0.713969	1
x2_hydroxybutyrate_p	acidaminococcus	(Intercept)	-3.88554	0.0999742	-38.8654	2.87795524978482e-36	1
x2_hydroxybutyrate_p	acidaminococcus	acidaminococcus	-2.59468	4.78006	-0.542813	0.589937	1
x2_hydroxybutyrate_p	acidaminococcus	intest_surgery1	-0.254393	0.144866	-1.75605	0.0858838	1
x3_hydroxybutyrate_p	acidaminococcus	(Intercept)	-3.73595	0.177037	-21.1027	5.67976426857212e-25	1
x3_hydroxybutyrate_p	acidaminococcus	acidaminococcus	-5.78519	8.46465	-0.683452	0.497825	1
x3_hydroxybutyrate_p	acidaminococcus	intest_surgery1	-0.195355	0.256533	-0.761521	0.450319	1
x3_hydroxyisovalerate_p	acidaminococcus	(Intercept)	-4.68036	0.0279336	-167.553	1.47238022965048e-64	1
x3_hydroxyisovalerate_p	acidaminococcus	acidaminococcus	0.7708	1.33558	0.577126	0.566731	1
x3_hydroxyisovalerate_p	acidaminococcus	intest_surgery1	0.0284787	0.0404768	0.70358	0.485319	1
acetate_p	acidaminococcus	(Intercept)	-2.93792	0.0518344	-56.679	1.7106581013391e-43	1
acetate_p	acidaminococcus	acidaminococcus	-0.648383	2.47835	-0.261619	0.794809	1
acetate_p	acidaminococcus	intest_surgery1	0.0885396	0.07511	1.1788	0.244673	1
acetoacetate_p	acidaminococcus	(Intercept)	-4.12512	0.0979323	-42.1222	8.46614746250294e-38	1
acetoacetate_p	acidaminococcus	acidaminococcus	-0.892064	4.68243	-0.190513	0.849764	1
acetoacetate_p	acidaminococcus	intest_surgery1	-0.0381275	0.141908	-0.268678	0.789405	1
alanine_p	acidaminococcus	(Intercept)	-1.42887	0.0547163	-26.1142	7.93601595033685e-29	1
alanine_p	acidaminococcus	acidaminococcus	4.20805	2.61614	1.6085	0.114721	1
alanine_p	acidaminococcus	intest_surgery1	0.164369	0.079286	2.07311	0.0439171	1
citrate_p	acidaminococcus	(Intercept)	-2.49807	0.0540589	-46.2102	1.43731076745021e-39	1
citrate_p	acidaminococcus	acidaminococcus	0.93884	2.58471	0.363228	0.718135	1
citrate_p	acidaminococcus	intest_surgery1	-0.0437807	0.0783334	-0.558902	0.579	1
creatinine_p	acidaminococcus	(Intercept)	-3.83458	0.0657523	-58.3185	4.82161807763355e-44	1
creatinine_p	acidaminococcus	acidaminococcus	1.76996	3.14381	0.562999	0.57623	1
creatinine_p	acidaminococcus	intest_surgery1	-0.116075	0.0952776	-1.21828	0.229465	1
formate_p	acidaminococcus	(Intercept)	-2.87674	0.0551564	-52.156	6.83259488151855e-42	1
formate_p	acidaminococcus	acidaminococcus	-4.19761	2.63719	-1.5917	0.118454	1
formate_p	acidaminococcus	intest_surgery1	0.0817931	0.0799238	1.02339	0.311594	1
glucose_p	acidaminococcus	(Intercept)	1.12904	0.0349704	32.2856	9.13249040127451e-33	1
glucose_p	acidaminococcus	acidaminococcus	1.5593	1.67204	0.932574	0.356017	1
glucose_p	acidaminococcus	intest_surgery1	-0.0164341	0.0506735	-0.324313	0.747204	1
glutamine_p	acidaminococcus	(Intercept)	-1.08499	0.035454	-30.6028	9.16507100970887e-32	1
glutamine_p	acidaminococcus	acidaminococcus	0.851105	1.69516	0.50208	0.618059	1
glutamine_p	acidaminococcus	intest_surgery1	0.116588	0.0513742	2.2694	0.0280861	1
glycine_p	acidaminococcus	(Intercept)	-1.78235	0.0663947	-26.8447	2.4673154137725e-29	1
glycine_p	acidaminococcus	acidaminococcus	0.928469	3.17452	0.292475	0.771268	1
glycine_p	acidaminococcus	intest_surgery1	0.182124	0.0962084	1.89301	0.0647979	1
histidine_p	acidaminococcus	(Intercept)	-2.89633	0.0503889	-57.4794	9.17821212375568e-44	1
histidine_p	acidaminococcus	acidaminococcus	-2.80763	2.40924	-1.16536	0.250014	1
histidine_p	acidaminococcus	intest_surgery1	0.0493812	0.0730155	0.676311	0.502305	1
isoleucine_p	acidaminococcus	(Intercept)	-3.42942	0.0553209	-61.9914	3.19114454283306e-45	1
isoleucine_p	acidaminococcus	acidaminococcus	2.86765	2.64505	1.08416	0.28407	1
isoleucine_p	acidaminococcus	intest_surgery1	0.00758938	0.0801621	0.0946755	0.924993	1
isopropanol_p	acidaminococcus	(Intercept)	-5.0895	0.31086	-16.3723	1.41574368089128e-20	1
isopropanol_p	acidaminococcus	acidaminococcus	2.58772	14.8631	0.174104	0.862565	1
isopropanol_p	acidaminococcus	intest_surgery1	-0.184787	0.450448	-0.41023	0.683584	1
lactate_p	acidaminococcus	(Intercept)	-0.0999092	0.0678988	-1.47144	0.14813	1
lactate_p	acidaminococcus	acidaminococcus	-0.531227	3.24644	-0.163634	0.870752	1
lactate_p	acidaminococcus	intest_surgery1	0.0176253	0.098388	0.179141	0.858631	1
leucine_p	acidaminococcus	(Intercept)	-2.85477	0.0555213	-51.4176	1.28457735143632e-41	1
leucine_p	acidaminococcus	acidaminococcus	0.121477	2.65464	0.0457605	0.963704	1
leucine_p	acidaminococcus	intest_surgery1	0.0198292	0.0804525	0.246471	0.806438	1
lysine_p	acidaminococcus	(Intercept)	-2.49096	0.049927	-49.892	4.86929108669437e-41	1
lysine_p	acidaminococcus	acidaminococcus	1.51057	2.38715	0.632794	0.530071	1
lysine_p	acidaminococcus	intest_surgery1	0.0265867	0.0723461	0.367494	0.714974	1
phenylalanine_p	acidaminococcus	(Intercept)	-3.30792	0.0414184	-79.8661	3.95065281531916e-50	1
phenylalanine_p	acidaminococcus	acidaminococcus	-0.688459	1.98033	-0.347648	0.729725	1
phenylalanine_p	acidaminococcus	intest_surgery1	-0.0655279	0.0600168	-1.09183	0.280721	1
pyruvate_p	acidaminococcus	(Intercept)	-3.2104	0.0806311	-39.816	9.99852789578612e-37	1
pyruvate_p	acidaminococcus	acidaminococcus	2.43475	3.85521	0.631548	0.530878	1
pyruvate_p	acidaminococcus	intest_surgery1	-0.0087	0.116838	-0.0744624	0.940972	1
tryptophan_p	acidaminococcus	(Intercept)	-3.48518	0.0592448	-58.8268	3.27899053554642e-44	1
tryptophan_p	acidaminococcus	acidaminococcus	-1.55696	2.83266	-0.549646	0.58528	1
tryptophan_p	acidaminococcus	intest_surgery1	-0.0341645	0.0858479	-0.397965	0.692538	1
tyrosine_p	acidaminococcus	(Intercept)	-3.20062	0.0541535	-59.1027	2.66355794140387e-44	1
tyrosine_p	acidaminococcus	acidaminococcus	3.1252	2.58924	1.207	0.23374	1
tyrosine_p	acidaminococcus	intest_surgery1	-0.0287342	0.0784706	-0.366179	0.715948	1
valine_p	acidaminococcus	(Intercept)	-1.99017	0.0460645	-43.204	2.77830198912797e-38	1
valine_p	acidaminococcus	acidaminococcus	0.736131	2.20248	0.334229	0.73976	1
valine_p	acidaminococcus	intest_surgery1	-0.0704553	0.0667492	-1.05552	0.296821	1
acetate_s	acidaminococcus	(Intercept)	4.31196	0.0656411	65.6899	2.41843673803436e-46	1
acetate_s	acidaminococcus	acidaminococcus	-1.70529	3.13849	-0.543348	0.589572	1
acetate_s	acidaminococcus	intest_surgery1	-0.11949	0.0951164	-1.25625	0.215509	1
alanine_s	acidaminococcus	(Intercept)	1.13179	0.105576	10.7202	5.62863571911557e-14	1
alanine_s	acidaminococcus	acidaminococcus	2.25862	5.04788	0.44744	0.656704	1
alanine_s	acidaminococcus	intest_surgery1	0.192746	0.152983	1.25991	0.214195	1
aspartate_s	acidaminococcus	(Intercept)	0.613118	0.108528	5.64939	1.03197846540433e-06	1
aspartate_s	acidaminococcus	acidaminococcus	0.805462	5.18904	0.155224	0.877339	1
aspartate_s	acidaminococcus	intest_surgery1	-0.322485	0.157261	-2.05063	0.0461541	1
butyrate_s	acidaminococcus	(Intercept)	2.65526	0.149486	17.7626	5.8502844488927e-22	1
butyrate_s	acidaminococcus	acidaminococcus	1.21334	7.14735	0.169761	0.865959	1
butyrate_s	acidaminococcus	intest_surgery1	-0.352745	0.216611	-1.62847	0.110406	1
formate_s	acidaminococcus	(Intercept)	-1.22136	0.160854	-7.59295	1.35730768761317e-09	1
formate_s	acidaminococcus	acidaminococcus	-4.8617	7.69092	-0.632136	0.530497	1
formate_s	acidaminococcus	intest_surgery1	0.132725	0.233084	0.569429	0.571896	1
glucose_s	acidaminococcus	(Intercept)	2.06466	0.149861	13.7772	9.39821546786591e-18	1
glucose_s	acidaminococcus	acidaminococcus	-7.33905	7.16526	-1.02425	0.31119	1
glucose_s	acidaminococcus	intest_surgery1	0.117931	0.217154	0.543075	0.589758	1
glutamate_s	acidaminococcus	(Intercept)	1.39223	0.135049	10.3091	1.98647388615464e-13	1
glutamate_s	acidaminococcus	acidaminococcus	-0.499877	6.45706	-0.0774156	0.938636	1
glutamate_s	acidaminococcus	intest_surgery1	-0.284534	0.195691	-1.454	0.152886	1
glutamine_s	acidaminococcus	(Intercept)	0.578819	0.108158	5.35162	2.82958527841532e-06	1
glutamine_s	acidaminococcus	acidaminococcus	-3.65657	5.17133	-0.707084	0.48316	1
glutamine_s	acidaminococcus	intest_surgery1	-0.285833	0.156725	-1.82379	0.0748288	1
histidine_s	acidaminococcus	(Intercept)	-0.551001	0.135648	-4.06199	0.000192239	1
histidine_s	acidaminococcus	acidaminococcus	5.09344	6.48571	0.785332	0.436374	1
histidine_s	acidaminococcus	intest_surgery1	0.0857055	0.196559	0.43603	0.6649	1
isoleucine_s	acidaminococcus	(Intercept)	0.739131	0.0985604	7.49927	1.86384925017055e-09	1
isoleucine_s	acidaminococcus	acidaminococcus	5.43214	4.71246	1.15272	0.255113	1
isoleucine_s	acidaminococcus	intest_surgery1	-0.0874432	0.142818	-0.612271	0.54344	1
lactate_s	acidaminococcus	(Intercept)	0.681407	0.130859	5.2072	4.60076330551534e-06	1
lactate_s	acidaminococcus	acidaminococcus	12.4635	6.25673	1.99201	0.0524586	1
lactate_s	acidaminococcus	intest_surgery1	-0.035319	0.189619	-0.186263	0.853076	1
leucine_s	acidaminococcus	(Intercept)	1.04389	0.112978	9.23973	5.83035060278932e-12	1
leucine_s	acidaminococcus	acidaminococcus	9.70248	5.40183	1.79615	0.0791863	1
leucine_s	acidaminococcus	intest_surgery1	-0.0344891	0.16371	-0.210672	0.834095	1
methylamine_s	acidaminococcus	(Intercept)	-1.28538	0.225231	-5.70694	8.48519796579134e-07	1
methylamine_s	acidaminococcus	acidaminococcus	4.72607	10.7689	0.438862	0.662862	1
methylamine_s	acidaminococcus	intest_surgery1	-0.877838	0.326368	-2.68972	0.00999658	1
phenylalanine_s	acidaminococcus	(Intercept)	0.487355	0.105237	4.63101	3.10830788439782e-05	1
phenylalanine_s	acidaminococcus	acidaminococcus	8.68931	5.03171	1.72691	0.0910431	1
phenylalanine_s	acidaminococcus	intest_surgery1	0.0785031	0.152493	0.514798	0.609214	1
propionate_s	acidaminococcus	(Intercept)	3.10458	0.0828723	37.4623	1.43425377737426e-35	1
propionate_s	acidaminococcus	acidaminococcus	2.09211	3.96237	0.527996	0.600096	1
propionate_s	acidaminococcus	intest_surgery1	-0.0233214	0.120085	-0.194207	0.846888	1
succinate_s	acidaminococcus	(Intercept)	-0.0655865	0.47986	-0.136679	0.891895	1
succinate_s	acidaminococcus	acidaminococcus	-23.6226	22.9435	-1.0296	0.308701	1
succinate_s	acidaminococcus	intest_surgery1	0.747982	0.695335	1.07571	0.287789	1
trimethylamine_s	acidaminococcus	(Intercept)	-1.88532	0.13228	-14.2525	2.69891705675999e-18	1
trimethylamine_s	acidaminococcus	acidaminococcus	19.6755	6.3247	3.1109	0.00323415	1
trimethylamine_s	acidaminococcus	intest_surgery1	0.0680706	0.191679	0.355128	0.724153	1
tyrosine_s	acidaminococcus	(Intercept)	0.570532	0.0945604	6.03352	2.78434816251409e-07	1
tyrosine_s	acidaminococcus	acidaminococcus	8.22608	4.52121	1.81944	0.0755005	1
tyrosine_s	acidaminococcus	intest_surgery1	-0.0379696	0.137022	-0.277106	0.782967	1
valine_s	acidaminococcus	(Intercept)	1.19438	0.121602	9.82207	9.09853515674638e-13	1
valine_s	acidaminococcus	acidaminococcus	10.7183	5.81414	1.84349	0.0718496	1
valine_s	acidaminococcus	intest_surgery1	-0.0402932	0.176206	-0.228671	0.820161	1
lithocholenic_acid_ba	acidaminococcus	(Intercept)	3.32571	0.442485	7.51599	1.76121845186166e-09	1
lithocholenic_acid_ba	acidaminococcus	acidaminococcus	39.0623	21.1565	1.84635	0.071425	1
lithocholenic_acid_ba	acidaminococcus	intest_surgery1	-1.83857	0.641178	-2.86748	0.00627512	1
isolithocholic_acid_ba	acidaminococcus	(Intercept)	6.23555	0.396948	15.7087	6.94518798981463e-20	1
isolithocholic_acid_ba	acidaminococcus	acidaminococcus	30.1576	18.9792	1.58898	0.119067	1
isolithocholic_acid_ba	acidaminococcus	intest_surgery1	-1.88075	0.575192	-3.26977	0.00206794	1
allolithocholic_acid_ba	acidaminococcus	(Intercept)	1.54435	0.397296	3.88716	0.000330756	1
allolithocholic_acid_ba	acidaminococcus	acidaminococcus	18.6254	18.9959	0.980495	0.332084	1
allolithocholic_acid_ba	acidaminococcus	intest_surgery1	-1.33677	0.575697	-2.322	0.0248165	1
x3a_12a_23_nordeoxycholic_acid_ba	acidaminococcus	(Intercept)	-3.06807	0.451395	-6.79688	2.04019393821502e-08	1
x3a_12a_23_nordeoxycholic_acid_ba	acidaminococcus	acidaminococcus	-2.53177	21.5825	-0.117307	0.907139	1
x3a_12a_23_nordeoxycholic_acid_ba	acidaminococcus	intest_surgery1	-0.130453	0.654088	-0.199442	0.842815	1
x3_6_diketocholanic_acid_ba	acidaminococcus	(Intercept)	2.48628	0.381092	6.52409	5.19102315853644e-08	1
x3_6_diketocholanic_acid_ba	acidaminococcus	acidaminococcus	22.744	18.2211	1.24822	0.218406	1
x3_6_diketocholanic_acid_ba	acidaminococcus	intest_surgery1	-0.665114	0.552217	-1.20444	0.234715	1
x8_14_5b_cholenic_acid_3a_12a_diol_ba	acidaminococcus	(Intercept)	4.80728	0.609676	7.88498	5.07077410747859e-10	1
x8_14_5b_cholenic_acid_3a_12a_diol_ba	acidaminococcus	acidaminococcus	37.7535	29.1503	1.29513	0.20188	1
x8_14_5b_cholenic_acid_3a_12a_diol_ba	acidaminococcus	intest_surgery1	-2.74556	0.883443	-3.10779	0.00326222	1
x5b_cholenic_acid_7a_ol_3_one_ba	acidaminococcus	(Intercept)	3.65848	0.259028	14.1239	3.77296496376854e-18	1
x5b_cholenic_acid_7a_ol_3_one_ba	acidaminococcus	acidaminococcus	10.4718	12.3849	0.845534	0.402286	1
x5b_cholenic_acid_7a_ol_3_one_ba	acidaminococcus	intest_surgery1	-0.205005	0.375341	-0.546183	0.587638	1
x5a_cholanic_acid_3a_ol_6_one_ba	acidaminococcus	(Intercept)	1.50162	1.01469	1.47988	0.145873	1
x5a_cholanic_acid_3a_ol_6_one_ba	acidaminococcus	acidaminococcus	26.6224	48.5152	0.548743	0.585894	1
x5a_cholanic_acid_3a_ol_6_one_ba	acidaminococcus	intest_surgery1	-0.944366	1.47032	-0.642285	0.523947	1
x3a_hydroxy_12_ketolithocholic_acid_ba	acidaminococcus	(Intercept)	2.30203	0.55134	4.17533	0.000134592	1
x3a_hydroxy_12_ketolithocholic_acid_ba	acidaminococcus	acidaminococcus	-8.05899	26.3611	-0.305715	0.761232	1
x3a_hydroxy_12_ketolithocholic_acid_ba	acidaminococcus	intest_surgery1	1.68683	0.798912	2.11141	0.040324	1
lithocholic_acid_ba	acidaminococcus	(Intercept)	6.27132	0.399093	15.7139	6.8582216604212e-20	1
lithocholic_acid_ba	acidaminococcus	acidaminococcus	30.2294	19.0818	1.5842	0.120151	1
lithocholic_acid_ba	acidaminococcus	intest_surgery1	-1.89514	0.578301	-3.27709	0.00202524	1
x5b_cholanic_acid_3b_12a_diol_ba	acidaminococcus	(Intercept)	2.76163	0.300971	9.17573	7.16820857748795e-12	1
x5b_cholanic_acid_3b_12a_diol_ba	acidaminococcus	acidaminococcus	-3.58327	14.3903	-0.249006	0.804489	1
x5b_cholanic_acid_3b_12a_diol_ba	acidaminococcus	intest_surgery1	0.074158	0.436118	0.170041	0.86574	1
chenodeoxycholic_acid_cdca_ba	acidaminococcus	(Intercept)	3.49411	0.771527	4.52882	4.3353860331335e-05	1
chenodeoxycholic_acid_cdca_ba	acidaminococcus	acidaminococcus	-52.5958	36.889	-1.42579	0.16083	1
chenodeoxycholic_acid_cdca_ba	acidaminococcus	intest_surgery1	2.36815	1.11797	2.11825	0.0397095	1
deoxycholic_acid_dca_ba	acidaminococcus	(Intercept)	6.68033	0.861255	7.75651	7.81358381357686e-10	1
deoxycholic_acid_dca_ba	acidaminococcus	acidaminococcus	31.0631	41.1791	0.754343	0.454573	1
deoxycholic_acid_dca_ba	acidaminococcus	intest_surgery1	-4.04912	1.24799	-3.24451	0.00222194	1
hyodeoxycholic_acid_ba	acidaminococcus	(Intercept)	4.65054	0.313689	14.8253	6.21607032557615e-19	1
hyodeoxycholic_acid_ba	acidaminococcus	acidaminococcus	1.52609	14.9984	0.10175	0.919407	1
hyodeoxycholic_acid_ba	acidaminococcus	intest_surgery1	-0.377016	0.454548	-0.829431	0.411239	1
isodeoxycholic_acid_ba	acidaminococcus	(Intercept)	-2.28263	0.761914	-2.99591	0.00443876	1
isodeoxycholic_acid_ba	acidaminococcus	acidaminococcus	-22.5268	36.4293	-0.61837	0.539449	1
isodeoxycholic_acid_ba	acidaminococcus	intest_surgery1	-1.28997	1.10404	-1.1684	0.248797	1
murocholic_acid_muro_ca_ba	acidaminococcus	(Intercept)	1.96436	0.724537	2.7112	0.00945784	1
murocholic_acid_muro_ca_ba	acidaminococcus	acidaminococcus	12.6322	34.6422	0.364649	0.717082	1
murocholic_acid_muro_ca_ba	acidaminococcus	intest_surgery1	0.350739	1.04988	0.334075	0.739875	1
ursodeoxycholic_acid_udca_ba	acidaminococcus	(Intercept)	3.50054	0.347553	10.0719	4.15252092443263e-13	1
ursodeoxycholic_acid_udca_ba	acidaminococcus	acidaminococcus	-4.65982	16.6175	-0.280416	0.780443	1
ursodeoxycholic_acid_udca_ba	acidaminococcus	intest_surgery1	0.62099	0.503618	1.23306	0.223957	1
x3a_hydroxy_7_12_diketo_cholanic_acid_ba	acidaminococcus	(Intercept)	-1.77946	0.421805	-4.21868	0.000117331	1
x3a_hydroxy_7_12_diketo_cholanic_acid_ba	acidaminococcus	acidaminococcus	-1.83461	20.1677	-0.0909676	0.927922	1
x3a_hydroxy_7_12_diketo_cholanic_acid_ba	acidaminococcus	intest_surgery1	0.435594	0.611211	0.712673	0.479727	1
x5b_cholanic_acid_3a_6a_diol_7_one_ba	acidaminococcus	(Intercept)	-1.59305	0.390704	-4.07738	0.000183198	1
x5b_cholanic_acid_3a_6a_diol_7_one_ba	acidaminococcus	acidaminococcus	7.63673	18.6807	0.408803	0.684623	1
x5b_cholanic_acid_3a_6a_diol_7_one_ba	acidaminococcus	intest_surgery1	-0.398718	0.566145	-0.704268	0.484895	1
x3_dehydrocholic_acid_ba	acidaminococcus	(Intercept)	0.560211	0.601842	0.930827	0.35691	1
x3_dehydrocholic_acid_ba	acidaminococcus	acidaminococcus	-42.5914	28.7758	-1.48011	0.145811	1
x3_dehydrocholic_acid_ba	acidaminococcus	intest_surgery1	1.26818	0.872092	1.45419	0.152834	1
cholic_acid_ca_ba	acidaminococcus	(Intercept)	3.88118	0.541131	7.17235	5.66076615589326e-09	1
cholic_acid_ca_ba	acidaminococcus	acidaminococcus	-14.88	25.8731	-0.575114	0.568079	1
cholic_acid_ca_ba	acidaminococcus	intest_surgery1	1.35421	0.78412	1.72705	0.0910186	1
hyocholic_acid_hca_ba	acidaminococcus	(Intercept)	0.95691	0.208494	4.58963	3.55752253299055e-05	0.950506
hyocholic_acid_hca_ba	acidaminococcus	acidaminococcus	-33.7226	9.9687	-3.38285	0.00149432	0.950506
hyocholic_acid_hca_ba	acidaminococcus	intest_surgery1	-0.0863245	0.302116	-0.285733	0.776394	0.950506
glycoursocholanic_acid_ba	acidaminococcus	(Intercept)	-5.29743	0.463982	-11.4173	6.9709158175111e-15	1
glycoursocholanic_acid_ba	acidaminococcus	acidaminococcus	-15.851	22.1843	-0.714516	0.478599	1
glycoursocholanic_acid_ba	acidaminococcus	intest_surgery1	0.827562	0.672327	1.23089	0.224759	1
glycolithocholic_acid_glca_ba	acidaminococcus	(Intercept)	-2.05253	0.345671	-5.9378	3.86175974969914e-07	1
glycolithocholic_acid_glca_ba	acidaminococcus	acidaminococcus	10.3789	16.5275	0.627975	0.533195	1
glycolithocholic_acid_glca_ba	acidaminococcus	intest_surgery1	-0.145484	0.500891	-0.290452	0.772805	1
glycoursodeoxycholic_acid_gudca_ba	acidaminococcus	(Intercept)	-2.92596	0.672161	-4.35307	7.64298699806771e-05	1
[truncated: 255,626+ more rows]

## Sheet: Week 6
metabolite	microbe	term	estimate	std.error	statistic	p.value	pval.adj
x2_hydroxybutyrate_p	acaryochloris	(Intercept)	-3.46559	0.115529	-29.9977	2.665075577315e-32	1
x2_hydroxybutyrate_p	acaryochloris	acaryochloris	15340.7	54519.8	0.281379	0.779655	1
x2_hydroxybutyrate_p	acaryochloris	intest_surgery1	-0.266878	0.15787	-1.69049	0.0975578	1
x3_hydroxybutyrate_p	acaryochloris	(Intercept)	-3.05274	0.198288	-15.3955	5.51677760779132e-20	1
x3_hydroxybutyrate_p	acaryochloris	acaryochloris	-43252.3	93575.2	-0.46222	0.646056	1
x3_hydroxybutyrate_p	acaryochloris	intest_surgery1	-0.25164	0.270961	-0.928692	0.357794	1
x3_hydroxyisovalerate_p	acaryochloris	(Intercept)	-4.63632	0.0194858	-237.933	4.53111910501318e-74	1
x3_hydroxyisovalerate_p	acaryochloris	acaryochloris	-7269.68	9195.67	-0.790556	0.433174	1
x3_hydroxyisovalerate_p	acaryochloris	intest_surgery1	-0.0273073	0.0266274	-1.02553	0.310361	1
acetate_p	acaryochloris	(Intercept)	-2.7577	0.0489145	-56.378	8.10885494804689e-45	1
acetate_p	acaryochloris	acaryochloris	21309.8	23083.6	0.923158	0.36064	1
acetate_p	acaryochloris	intest_surgery1	-0.0696456	0.0668419	-1.04194	0.302767	1
acetoacetate_p	acaryochloris	(Intercept)	-3.66771	0.114336	-32.0783	1.31641521879999e-33	1
acetoacetate_p	acaryochloris	acaryochloris	-9109.37	53957	-0.168826	0.866658	1
acetoacetate_p	acaryochloris	intest_surgery1	-0.140541	0.156241	-0.899515	0.372964	1
alanine_p	acaryochloris	(Intercept)	-1.44147	0.050119	-28.7609	1.74439074442822e-31	1
alanine_p	acaryochloris	acaryochloris	-3616.44	23652	-0.152902	0.87913	1
alanine_p	acaryochloris	intest_surgery1	0.0616733	0.0684879	0.900499	0.372446	1
citrate_p	acaryochloris	(Intercept)	-2.37895	0.0593551	-40.08	5.39448816508635e-38	1
citrate_p	acaryochloris	acaryochloris	6094.64	28010.6	0.217583	0.828696	1
citrate_p	acaryochloris	intest_surgery1	-0.10878	0.0811091	-1.34116	0.186314	1
creatinine_p	acaryochloris	(Intercept)	-3.59502	0.0650566	-55.2598	2.05081520507109e-44	1
creatinine_p	acaryochloris	acaryochloris	-37681.1	30701.3	-1.22735	0.225805	1
creatinine_p	acaryochloris	intest_surgery1	-0.163632	0.0889002	-1.84062	0.071995	1
formate_p	acaryochloris	(Intercept)	-2.87209	0.061445	-46.7425	4.66247483310588e-41	1
formate_p	acaryochloris	acaryochloris	2411.68	28996.9	0.0831704	0.934069	1
formate_p	acaryochloris	intest_surgery1	0.135541	0.0839649	1.61425	0.113167	1
glucose_p	acaryochloris	(Intercept)	1.13319	0.0216321	52.3848	2.42907910402768e-43	1
glucose_p	acaryochloris	acaryochloris	17857.8	10208.5	1.7493	0.0867671	1
glucose_p	acaryochloris	intest_surgery1	-0.0528043	0.0295604	-1.78632	0.080499	1
glutamine_p	acaryochloris	(Intercept)	-1.08996	0.0310674	-35.0836	2.3083973278174e-35	1
glutamine_p	acaryochloris	acaryochloris	26219	14661.2	1.78832	0.0801718	1
glutamine_p	acaryochloris	intest_surgery1	0.046932	0.0424538	1.10548	0.274577	1
glycine_p	acaryochloris	(Intercept)	-1.75101	0.0548575	-31.9192	1.64652738899299e-33	1
glycine_p	acaryochloris	acaryochloris	-8679.05	25888.2	-0.335252	0.738927	1
glycine_p	acaryochloris	intest_surgery1	0.119795	0.0749631	1.59805	0.116733	1
histidine_p	acaryochloris	(Intercept)	-2.90291	0.0434421	-66.8225	3.03267483789264e-48	1
histidine_p	acaryochloris	acaryochloris	21368.2	20501	1.0423	0.302606	1
histidine_p	acaryochloris	intest_surgery1	-0.0104924	0.0593639	-0.176748	0.860466	1
isoleucine_p	acaryochloris	(Intercept)	-3.12625	0.07851	-39.8198	7.26433834978557e-38	1
isoleucine_p	acaryochloris	acaryochloris	30367	37050.2	0.819619	0.416571	1
isoleucine_p	acaryochloris	intest_surgery1	-0.139243	0.107284	-1.29789	0.200659	1
isopropanol_p	acaryochloris	(Intercept)	-5.01541	0.274548	-18.2679	5.50984193958101e-23	1
isopropanol_p	acaryochloris	acaryochloris	-89446.9	129564	-0.690369	0.493357	1
isopropanol_p	acaryochloris	intest_surgery1	-0.000550084	0.375172	-0.00146622	0.998836	1
lactate_p	acaryochloris	(Intercept)	-0.254504	0.0805844	-3.15823	0.00277287	1
lactate_p	acaryochloris	acaryochloris	-47963.4	38029.1	-1.26123	0.213451	1
lactate_p	acaryochloris	intest_surgery1	0.148535	0.110119	1.34886	0.183846	1
leucine_p	acaryochloris	(Intercept)	-2.63069	0.0694863	-37.8591	7.2656812242423e-37	1
leucine_p	acaryochloris	acaryochloris	25331.2	32791.7	0.772488	0.443693	1
leucine_p	acaryochloris	intest_surgery1	-0.125969	0.0949534	-1.32664	0.191037	1
lysine_p	acaryochloris	(Intercept)	-2.30203	0.0565894	-40.6795	2.73674072114416e-38	1
lysine_p	acaryochloris	acaryochloris	20284	26705.4	0.759546	0.451319	1
lysine_p	acaryochloris	intest_surgery1	-0.0630107	0.0773297	-0.814833	0.419278	1
phenylalanine_p	acaryochloris	(Intercept)	-3.25557	0.0466641	-69.766	4.07882277220069e-49	1
phenylalanine_p	acaryochloris	acaryochloris	31669.6	22021.6	1.43812	0.157026	1
phenylalanine_p	acaryochloris	intest_surgery1	-0.0625479	0.0637668	-0.980885	0.331672	1
pyruvate_p	acaryochloris	(Intercept)	-3.23064	0.0872437	-37.03	1.99026651138017e-36	1
pyruvate_p	acaryochloris	acaryochloris	-78898.3	41171.8	-1.91632	0.0614169	1
pyruvate_p	acaryochloris	intest_surgery1	0.0185489	0.119219	0.155587	0.877025	1
tryptophan_p	acaryochloris	(Intercept)	-3.3468	0.059975	-55.8033	1.30348242397021e-44	1
tryptophan_p	acaryochloris	acaryochloris	23247.8	28303.2	0.821383	0.415575	1
tryptophan_p	acaryochloris	intest_surgery1	-0.112401	0.0819562	-1.37147	0.17674	1
tyrosine_p	acaryochloris	(Intercept)	-3.02554	0.0748105	-40.4428	3.57362571699952e-38	1
tyrosine_p	acaryochloris	acaryochloris	12400.7	35304.3	0.351251	0.72697	1
tyrosine_p	acaryochloris	intest_surgery1	-0.117595	0.102229	-1.15031	0.255835	1
valine_p	acaryochloris	(Intercept)	-1.78705	0.0643421	-27.7742	8.22966039041976e-31	1
valine_p	acaryochloris	acaryochloris	27582	30364.1	0.908374	0.368315	1
valine_p	acaryochloris	intest_surgery1	-0.12639	0.0879239	-1.43749	0.157203	1
acetate_s	acaryochloris	(Intercept)	4.1575	0.0945013	43.9941	7.55886290807662e-40	1
acetate_s	acaryochloris	acaryochloris	13972.5	44596.7	0.313307	0.755433	1
acetate_s	acaryochloris	intest_surgery1	0.14626	0.129137	1.1326	0.263126	1
alanine_s	acaryochloris	(Intercept)	1.02396	0.116212	8.81117	1.61351296943018e-11	1
alanine_s	acaryochloris	acaryochloris	51780.3	54842.2	0.94417	0.349911	1
alanine_s	acaryochloris	intest_surgery1	0.348486	0.158804	2.19445	0.0331807	1
aspartate_s	acaryochloris	(Intercept)	0.587467	0.0973693	6.03339	2.39600929731772e-07	1
aspartate_s	acaryochloris	acaryochloris	-7763.72	45950.2	-0.16896	0.866554	1
aspartate_s	acaryochloris	intest_surgery1	-0.227695	0.133056	-1.71128	0.0936224	1
butyrate_s	acaryochloris	(Intercept)	2.50899	0.151168	16.5974	2.76032599862314e-21	1
butyrate_s	acaryochloris	acaryochloris	22972.7	71338.5	0.322023	0.748863	1
butyrate_s	acaryochloris	intest_surgery1	-0.356364	0.206571	-1.72514	0.0910739	1
formate_s	acaryochloris	(Intercept)	-1.31692	0.0980029	-13.4376	1.0320632757755e-17	1
formate_s	acaryochloris	acaryochloris	-22295.2	46249.2	-0.482067	0.631996	1
formate_s	acaryochloris	intest_surgery1	-0.0951549	0.133922	-0.710528	0.480888	1
glucose_s	acaryochloris	(Intercept)	1.0273	0.182803	5.61971	1.00807308043544e-06	1
glucose_s	acaryochloris	acaryochloris	80632.1	86267.6	0.934674	0.354734	1
glucose_s	acaryochloris	intest_surgery1	0.558465	0.249801	2.23564	0.0301634	1
glutamate_s	acaryochloris	(Intercept)	1.21257	0.165957	7.30656	2.8068320015731e-09	1
glutamate_s	acaryochloris	acaryochloris	110290	78317.7	1.40824	0.165641	1
glutamate_s	acaryochloris	intest_surgery1	0.102016	0.226781	0.449844	0.654891	1
glutamine_s	acaryochloris	(Intercept)	0.419274	0.0942633	4.4479	5.28743306244156e-05	1
glutamine_s	acaryochloris	acaryochloris	11003.1	44484.4	0.247348	0.805716	1
glutamine_s	acaryochloris	intest_surgery1	-0.193289	0.128811	-1.50056	0.140158	1
histidine_s	acaryochloris	(Intercept)	-0.68518	0.137386	-4.98726	8.7823817320265e-06	1
histidine_s	acaryochloris	acaryochloris	-16631.2	64834.8	-0.256517	0.798671	1
histidine_s	acaryochloris	intest_surgery1	0.053839	0.187739	0.286776	0.775544	1
isoleucine_s	acaryochloris	(Intercept)	0.614879	0.0951262	6.46382	5.3278987203304e-08	1
isoleucine_s	acaryochloris	acaryochloris	66149.3	44891.6	1.47353	0.147274	1
isoleucine_s	acaryochloris	intest_surgery1	0.0360761	0.129991	0.277529	0.782591	1
lactate_s	acaryochloris	(Intercept)	0.649855	0.14769	4.40012	6.18015240080597e-05	1
lactate_s	acaryochloris	acaryochloris	111656	69697.5	1.60201	0.115854	1
lactate_s	acaryochloris	intest_surgery1	0.180383	0.20182	0.893782	0.375992	1
leucine_s	acaryochloris	(Intercept)	0.915064	0.100086	9.14282	5.32018527515901e-12	1
leucine_s	acaryochloris	acaryochloris	53194.8	47232	1.12624	0.26578	1
leucine_s	acaryochloris	intest_surgery1	0.13298	0.136767	0.97231	0.335874	1
methylamine_s	acaryochloris	(Intercept)	-1.63179	0.255923	-6.37608	7.24117056863054e-08	1
methylamine_s	acaryochloris	acaryochloris	3054.12	120774	0.0252879	0.979932	1
methylamine_s	acaryochloris	intest_surgery1	-0.74783	0.34972	-2.13837	0.0377153	1
phenylalanine_s	acaryochloris	(Intercept)	0.382532	0.0974305	3.9262	0.000280808	1
phenylalanine_s	acaryochloris	acaryochloris	36497.9	45979	0.793794	0.431305	1
phenylalanine_s	acaryochloris	intest_surgery1	0.212662	0.133139	1.59729	0.116903	1
propionate_s	acaryochloris	(Intercept)	2.91547	0.174621	16.6959	2.17420378777771e-21	1
propionate_s	acaryochloris	acaryochloris	-15200.5	82406.7	-0.184457	0.854449	1
propionate_s	acaryochloris	intest_surgery1	-0.0700915	0.238621	-0.293735	0.770253	1
succinate_s	acaryochloris	(Intercept)	-0.70272	0.44546	-1.57752	0.121385	1
succinate_s	acaryochloris	acaryochloris	-79953.2	210220	-0.380331	0.705413	1
succinate_s	acaryochloris	intest_surgery1	1.63731	0.608723	2.68975	0.00986657	1
trimethylamine_s	acaryochloris	(Intercept)	-1.85653	0.177983	-10.4309	8.06310540325651e-14	1
trimethylamine_s	acaryochloris	acaryochloris	119686	83993.3	1.42494	0.160781	1
trimethylamine_s	acaryochloris	intest_surgery1	0.243682	0.243215	1.00192	0.321513	1
tyrosine_s	acaryochloris	(Intercept)	0.458658	0.0997342	4.5988	3.21929857320341e-05	1
tyrosine_s	acaryochloris	acaryochloris	36519.8	47066.2	0.775925	0.441681	1
tyrosine_s	acaryochloris	intest_surgery1	0.106834	0.136287	0.783891	0.437037	1
valine_s	acaryochloris	(Intercept)	1.04379	0.107509	9.70886	8.23800576318131e-13	1
valine_s	acaryochloris	acaryochloris	60414.9	50735.2	1.19079	0.239716	1
valine_s	acaryochloris	intest_surgery1	0.149274	0.146911	1.01608	0.314793	1
lithocholenic_acid_ba	acaryochloris	(Intercept)	3.4824	0.494249	7.04584	6.9648575508669e-09	1
lithocholenic_acid_ba	acaryochloris	acaryochloris	185190	233244	0.793973	0.431202	1
lithocholenic_acid_ba	acaryochloris	intest_surgery1	-2.30774	0.675394	-3.41687	0.00131636	1
isolithocholic_acid_ba	acaryochloris	(Intercept)	5.96797	0.452391	13.1921	2.0549284630438e-17	1
isolithocholic_acid_ba	acaryochloris	acaryochloris	124095	213491	0.581267	0.563838	1
isolithocholic_acid_ba	acaryochloris	intest_surgery1	-2.16841	0.618194	-3.50765	0.00100672	1
allolithocholic_acid_ba	acaryochloris	(Intercept)	1.9105	0.34713	5.5037	1.50473635594301e-06	1
allolithocholic_acid_ba	acaryochloris	acaryochloris	73229.7	163816	0.447023	0.656912	1
allolithocholic_acid_ba	acaryochloris	intest_surgery1	-2.04682	0.474355	-4.31496	8.14940817477327e-05	1
x3a_12a_23_nordeoxycholic_acid_ba	acaryochloris	(Intercept)	-4.12631	0.508316	-8.11761	1.70123608434811e-10	1
x3a_12a_23_nordeoxycholic_acid_ba	acaryochloris	acaryochloris	550182	239883	2.29355	0.026334	1
x3a_12a_23_nordeoxycholic_acid_ba	acaryochloris	intest_surgery1	-0.582672	0.694617	-0.838839	0.405806	1
x3_6_diketocholanic_acid_ba	acaryochloris	(Intercept)	3.03869	0.373741	8.13047	1.6279241162841e-10	1
x3_6_diketocholanic_acid_ba	acaryochloris	acaryochloris	168396	176375	0.954764	0.344582	1
x3_6_diketocholanic_acid_ba	acaryochloris	intest_surgery1	-0.957758	0.510719	-1.87531	0.0669701	1
x8_14_5b_cholenic_acid_3a_12a_diol_ba	acaryochloris	(Intercept)	4.70567	0.507417	9.27378	3.44420006174842e-12	1
x8_14_5b_cholenic_acid_3a_12a_diol_ba	acaryochloris	acaryochloris	168769	239458	0.704793	0.484417	1
x8_14_5b_cholenic_acid_3a_12a_diol_ba	acaryochloris	intest_surgery1	-2.38595	0.693388	-3.441	0.0012262	1
x5b_cholenic_acid_7a_ol_3_one_ba	acaryochloris	(Intercept)	3.70512	0.177737	20.8461	2.17234181804873e-25	1
x5b_cholenic_acid_7a_ol_3_one_ba	acaryochloris	acaryochloris	72142.5	83876.8	0.860101	0.3941	1
x5b_cholenic_acid_7a_ol_3_one_ba	acaryochloris	intest_surgery1	-0.0738936	0.242878	-0.304242	0.762287	1
x5a_cholanic_acid_3a_ol_6_one_ba	acaryochloris	(Intercept)	2.71459	0.91112	2.9794	0.00455961	1
x5a_cholanic_acid_3a_ol_6_one_ba	acaryochloris	acaryochloris	220554	429972	0.512949	0.610389	1
x5a_cholanic_acid_3a_ol_6_one_ba	acaryochloris	intest_surgery1	-2.30031	1.24505	-1.84757	0.0709643	1
x3a_hydroxy_12_ketolithocholic_acid_ba	acaryochloris	(Intercept)	0.835057	0.665466	1.25484	0.215739	1
x3a_hydroxy_12_ketolithocholic_acid_ba	acaryochloris	acaryochloris	118914	314044	0.378654	0.70665	1
x3a_hydroxy_12_ketolithocholic_acid_ba	acaryochloris	intest_surgery1	3.54086	0.909364	3.89378	0.000310683	1
lithocholic_acid_ba	acaryochloris	(Intercept)	5.99548	0.453037	13.234	1.82595474057641e-17	1
lithocholic_acid_ba	acaryochloris	acaryochloris	123721	213795	0.578688	0.565563	1
lithocholic_acid_ba	acaryochloris	intest_surgery1	-2.17214	0.619077	-3.50867	0.00100368	1
x5b_cholanic_acid_3b_12a_diol_ba	acaryochloris	(Intercept)	2.17945	0.296674	7.34629	2.44443383371204e-09	1
x5b_cholanic_acid_3b_12a_diol_ba	acaryochloris	acaryochloris	118874	140005	0.849067	0.400148	1
x5b_cholanic_acid_3b_12a_diol_ba	acaryochloris	intest_surgery1	0.460183	0.405407	1.13512	0.262083	1
chenodeoxycholic_acid_cdca_ba	acaryochloris	(Intercept)	0.322198	0.938959	0.343144	0.73302	1
chenodeoxycholic_acid_cdca_ba	acaryochloris	acaryochloris	502738	443110	1.13457	0.26231	1
chenodeoxycholic_acid_cdca_ba	acaryochloris	intest_surgery1	5.78278	1.28309	4.50691	4.35766421121477e-05	1
deoxycholic_acid_dca_ba	acaryochloris	(Intercept)	5.98356	1.05734	5.65906	8.79771035494255e-07	1
deoxycholic_acid_dca_ba	acaryochloris	acaryochloris	205385	498977	0.411613	0.682494	1
deoxycholic_acid_dca_ba	acaryochloris	intest_surgery1	-4.97562	1.44486	-3.44366	0.00121664	1
hyodeoxycholic_acid_ba	acaryochloris	(Intercept)	4.05269	0.285723	14.184	1.33112574552841e-18	1
hyodeoxycholic_acid_ba	acaryochloris	acaryochloris	128253	134838	0.951166	0.346386	1
hyodeoxycholic_acid_ba	acaryochloris	intest_surgery1	-0.189235	0.390443	-0.484669	0.630162	1
isodeoxycholic_acid_ba	acaryochloris	(Intercept)	-3.04946	0.683105	-4.46412	5.01423725588106e-05	1
isodeoxycholic_acid_ba	acaryochloris	acaryochloris	361612	322368	1.12173	0.267674	1
isodeoxycholic_acid_ba	acaryochloris	intest_surgery1	1.60796	0.933466	1.72257	0.0915416	1
murocholic_acid_muro_ca_ba	acaryochloris	(Intercept)	1.32783	0.590286	2.24948	0.029206	1
murocholic_acid_muro_ca_ba	acaryochloris	acaryochloris	2432.68	278565	0.00873289	0.993069	1
murocholic_acid_muro_ca_ba	acaryochloris	intest_surgery1	2.04514	0.806628	2.53541	0.0146173	1
ursodeoxycholic_acid_udca_ba	acaryochloris	(Intercept)	2.87277	0.312788	9.1844	4.63325430382375e-12	1
ursodeoxycholic_acid_udca_ba	acaryochloris	acaryochloris	-127450	147610	-0.863428	0.392287	1
ursodeoxycholic_acid_udca_ba	acaryochloris	intest_surgery1	1.50357	0.427426	3.51772	0.000976999	1
x3a_hydroxy_7_12_diketo_cholanic_acid_ba	acaryochloris	(Intercept)	-2.52195	0.506456	-4.97961	9.01221503121874e-06	1
x3a_hydroxy_7_12_diketo_cholanic_acid_ba	acaryochloris	acaryochloris	112115	239005	0.46909	0.641174	1
x3a_hydroxy_7_12_diketo_cholanic_acid_ba	acaryochloris	intest_surgery1	2.16828	0.692075	3.13302	0.00297698	1
x5b_cholanic_acid_3a_6a_diol_7_one_ba	acaryochloris	(Intercept)	-2.25816	0.498159	-4.533	3.99945110316097e-05	1
x5b_cholanic_acid_3a_6a_diol_7_one_ba	acaryochloris	acaryochloris	245947	235089	1.04618	0.300827	1
x5b_cholanic_acid_3a_6a_diol_7_one_ba	acaryochloris	intest_surgery1	-0.904401	0.680737	-1.32856	0.190407	1
x3_dehydrocholic_acid_ba	acaryochloris	(Intercept)	-0.532363	0.591899	-0.899416	0.373016	1
x3_dehydrocholic_acid_ba	acaryochloris	acaryochloris	180492	279327	0.646166	0.521314	1
x3_dehydrocholic_acid_ba	acaryochloris	intest_surgery1	3.5228	0.808833	4.35541	7.14756643230544e-05	1
cholic_acid_ca_ba	acaryochloris	(Intercept)	2.85106	0.516546	5.51948	1.42503659117357e-06	1
cholic_acid_ca_ba	acaryochloris	acaryochloris	89939.9	243766	0.368959	0.713815	1
cholic_acid_ca_ba	acaryochloris	intest_surgery1	3.19803	0.705863	4.53067	4.030228933234e-05	1
hyocholic_acid_hca_ba	acaryochloris	(Intercept)	0.900395	0.233152	3.86183	0.000343107	1
hyocholic_acid_hca_ba	acaryochloris	acaryochloris	-15487.8	110028	-0.140762	0.888659	1
hyocholic_acid_hca_ba	acaryochloris	intest_surgery1	-0.312344	0.318604	-0.980352	0.331932	1
glycoursocholanic_acid_ba	acaryochloris	(Intercept)	-3.71264	0.54061	-6.86751	1.29847022709452e-08	1
glycoursocholanic_acid_ba	acaryochloris	acaryochloris	41421.9	255123	0.162361	0.871718	1
glycoursocholanic_acid_ba	acaryochloris	intest_surgery1	-1.53042	0.738746	-2.07164	0.0438124	1
glycolithocholic_acid_glca_ba	acaryochloris	(Intercept)	-2.34784	0.286579	-8.19265	1.31573367119224e-10	1
glycolithocholic_acid_glca_ba	acaryochloris	acaryochloris	260413	135241	1.92554	0.0602242	1
glycolithocholic_acid_glca_ba	acaryochloris	intest_surgery1	-0.242019	0.391612	-0.618007	0.539554	1
glycoursodeoxycholic_acid_gudca_ba	acaryochloris	(Intercept)	-4.4422	0.693386	-6.40654	6.50969339846809e-08	1
glycoursodeoxycholic_acid_gudca_ba	acaryochloris	acaryochloris	-288272	327220	-0.880973	0.382816	1
glycoursodeoxycholic_acid_gudca_ba	acaryochloris	intest_surgery1	2.31696	0.947515	2.4453	0.0182744	1
glycochenodeoxycholic_acid_gcdca_ba	acaryochloris	(Intercept)	1.27382	0.302295	4.21384	0.000112899	1
glycochenodeoxycholic_acid_gcdca_ba	acaryochloris	acaryochloris	-44483.8	142658	-0.311822	0.756555	1
glycochenodeoxycholic_acid_gcdca_ba	acaryochloris	intest_surgery1	1.06756	0.413088	2.58433	0.0129235	1
glycodeoxycholic_acid_gdca_ba	acaryochloris	(Intercept)	-0.0100459	0.543033	-0.0184995	0.985319	1
glycodeoxycholic_acid_gdca_ba	acaryochloris	acaryochloris	318842	256266	1.24418	0.219602	1
glycodeoxycholic_acid_gdca_ba	acaryochloris	intest_surgery1	-1.46398	0.742058	-1.97287	0.0544087	1
glycocholic_acid_gca_ba	acaryochloris	(Intercept)	0.60454	0.304369	1.98621	0.052859	1
glycocholic_acid_gca_ba	acaryochloris	acaryochloris	-37285.7	143637	-0.259584	0.796319	1
glycocholic_acid_gca_ba	acaryochloris	intest_surgery1	0.942478	0.415922	2.266	0.0280981	1
taurolithocholic_acid_tlca_ba	acaryochloris	(Intercept)	-2.48931	0.516	-4.82425	1.52006081261408e-05	1
taurolithocholic_acid_tlca_ba	acaryochloris	acaryochloris	-12653.7	243509	-0.051964	0.958778	1
taurolithocholic_acid_tlca_ba	acaryochloris	intest_surgery1	-1.0466	0.705117	-1.48429	0.144409	1
taurochenodeoxycholic_acid_tcdca_ba	acaryochloris	(Intercept)	0.0778039	0.424567	0.183255	0.855386	1
taurochenodeoxycholic_acid_tcdca_ba	acaryochloris	acaryochloris	-73567.9	200360	-0.367179	0.715134	1
taurochenodeoxycholic_acid_tcdca_ba	acaryochloris	intest_surgery1	0.900731	0.580173	1.55252	0.127246	1
taurodeoxycholic_acid_tdca_ba	acaryochloris	(Intercept)	-0.57058	0.481611	-1.18473	0.242079	1
taurodeoxycholic_acid_tdca_ba	acaryochloris	acaryochloris	135322	227280	0.595396	0.554435	1
taurodeoxycholic_acid_tdca_ba	acaryochloris	intest_surgery1	-1.90601	0.658124	-2.89613	0.0057176	1
tauro_w_muricholic_acid_tw_mca_ba	acaryochloris	(Intercept)	-3.55328	0.73437	-4.83853	1.44897464374349e-05	1
tauro_w_muricholic_acid_tw_mca_ba	acaryochloris	acaryochloris	-354461	346561	-1.02279	0.311641	1
tauro_w_muricholic_acid_tw_mca_ba	acaryochloris	intest_surgery1	1.3005	1.00352	1.29593	0.201327	1
taurocholic_acid_tca_ba	acaryochloris	(Intercept)	0.920449	0.357125	2.57739	0.0131525	1
taurocholic_acid_tca_ba	acaryochloris	acaryochloris	-152165	168533	-0.902877	0.371196	1
taurocholic_acid_tca_ba	acaryochloris	intest_surgery1	0.836576	0.488013	1.71425	0.0930715	1
x2_hydroxybutyrate_p	acetoanaerobium	(Intercept)	-3.48999	0.126958	-27.4893	1.29994733796383e-30	1
x2_hydroxybutyrate_p	acetoanaerobium	acetoanaerobium	3172.38	6000.95	0.528647	0.599538	1
x2_hydroxybutyrate_p	acetoanaerobium	intest_surgery1	-0.283555	0.160059	-1.77156	0.0829506	1
x3_hydroxybutyrate_p	acetoanaerobium	(Intercept)	-3.10021	0.218853	-14.1657	1.39819825601982e-18	1
x3_hydroxybutyrate_p	acetoanaerobium	acetoanaerobium	720.672	10344.5	0.069667	0.944754	1
x3_hydroxybutyrate_p	acetoanaerobium	intest_surgery1	-0.250974	0.275913	-0.909614	0.367667	1
x3_hydroxyisovalerate_p	acetoanaerobium	(Intercept)	-4.66065	0.0211126	-220.752	1.53000495050448e-72	1
x3_hydroxyisovalerate_p	acetoanaerobium	acetoanaerobium	1480.59	997.93	1.48366	0.144575	1
x3_hydroxyisovalerate_p	acetoanaerobium	intest_surgery1	-0.033716	0.0266171	-1.2667	0.211504	1
acetate_p	acetoanaerobium	(Intercept)	-2.74075	0.0543514	-50.4265	1.41191975954495e-42	1
acetate_p	acetoanaerobium	acetoanaerobium	179.971	2569.03	0.0700539	0.944448	1
acetate_p	acetoanaerobium	intest_surgery1	-0.0725396	0.0685222	-1.05863	0.295179	1
acetoacetate_p	acetoanaerobium	(Intercept)	-3.76114	0.124039	-30.3222	1.64701322519772e-32	1
acetoacetate_p	acetoanaerobium	acetoanaerobium	7087.72	5862.97	1.2089	0.232749	1
acetoacetate_p	acetoanaerobium	intest_surgery1	-0.173668	0.156379	-1.11056	0.272409	1
alanine_p	acetoanaerobium	(Intercept)	-1.43972	0.0551933	-26.085	1.3174092898565e-29	1
alanine_p	acetoanaerobium	acetoanaerobium	-415.141	2608.83	-0.159129	0.874249	1
alanine_p	acetoanaerobium	intest_surgery1	0.0640091	0.0695837	0.919886	0.362329	1
citrate_p	acetoanaerobium	(Intercept)	-2.39173	0.0652312	-36.6653	3.12100689825226e-36	1
citrate_p	acetoanaerobium	acetoanaerobium	1516.34	3083.29	0.491793	0.625155	1
citrate_p	acetoanaerobium	intest_surgery1	-0.116634	0.0822387	-1.41824	0.162718	1
creatinine_p	acetoanaerobium	(Intercept)	-3.67672	0.071739	-51.2514	6.67435699421239e-43	1
creatinine_p	acetoanaerobium	acetoanaerobium	3982.11	3390.89	1.17435	0.246169	1
creatinine_p	acetoanaerobium	intest_surgery1	-0.17914	0.0904432	-1.98069	0.0534949	1
formate_p	acetoanaerobium	(Intercept)	-2.8904	0.0674684	-42.8407	2.55741566330548e-39	1
formate_p	acetoanaerobium	acetoanaerobium	1701.47	3189.04	0.533538	0.596175	1
formate_p	acetoanaerobium	intest_surgery1	0.12715	0.0850592	1.49484	0.141641	1
glucose_p	acetoanaerobium	(Intercept)	1.14969	0.0245857	46.7625	4.57180909861725e-41	1
glucose_p	acetoanaerobium	acetoanaerobium	-39.535	1162.1	-0.0340204	0.973005	1
glucose_p	acetoanaerobium	intest_surgery1	-0.0543165	0.0309959	-1.75238	0.0862308	1
glutamine_p	acetoanaerobium	(Intercept)	-1.04308	0.0348469	-29.9331	2.93491907134033e-32	1
glutamine_p	acetoanaerobium	acetoanaerobium	-1941.97	1647.11	-1.17902	0.244326	1
glutamine_p	acetoanaerobium	intest_surgery1	0.0537478	0.0439324	1.22342	0.227269	1
glycine_p	acetoanaerobium	(Intercept)	-1.75282	0.0604656	-28.9886	1.22768021157357e-31	1
glycine_p	acetoanaerobium	acetoanaerobium	-496.922	2858.03	-0.173868	0.862716	1
glycine_p	acetoanaerobium	intest_surgery1	0.123005	0.0762306	1.6136	0.11331	1
histidine_p	acetoanaerobium	(Intercept)	-2.88371	0.0483912	-59.5917	6.20430691155822e-46	1
histidine_p	acetoanaerobium	acetoanaerobium	-2.06943	2287.31	-0.000904743	0.999282	1
histidine_p	acetoanaerobium	intest_surgery1	-0.0125188	0.061008	-0.2052	0.838302	1
isoleucine_p	acetoanaerobium	(Intercept)	-3.19524	0.0835028	-38.2651	4.46955269848609e-37	1
isoleucine_p	acetoanaerobium	acetoanaerobium	8000.59	3946.94	2.02704	0.0483518	1
isoleucine_p	acetoanaerobium	intest_surgery1	-0.180511	0.105274	-1.71467	0.0929926	1
isopropanol_p	acetoanaerobium	(Intercept)	-5.18453	0.303024	-17.1093	8.07612809984158e-22	1
isopropanol_p	acetoanaerobium	acetoanaerobium	7388.03	14323.1	0.515813	0.608403	1
isopropanol_p	acetoanaerobium	intest_surgery1	-0.0274616	0.38203	-0.0718834	0.943	1
lactate_p	acetoanaerobium	(Intercept)	-0.211695	0.0875058	-2.41921	0.019478	1
lactate_p	acetoanaerobium	acetoanaerobium	-7136.28	4136.14	-1.72535	0.0910356	1
lactate_p	acetoanaerobium	intest_surgery1	0.187334	0.110321	1.69808	0.0961045	1
leucine_p	acetoanaerobium	(Intercept)	-2.6921	0.0739208	-36.4187	4.24136452008031e-36	1
leucine_p	acetoanaerobium	acetoanaerobium	6994.1	3494.02	2.00173	0.0511042	1
leucine_p	acetoanaerobium	intest_surgery1	-0.161929	0.0931938	-1.73756	0.0888386	1
lysine_p	acetoanaerobium	(Intercept)	-2.31346	0.0622388	-37.1707	1.67498424398038e-36	1
lysine_p	acetoanaerobium	acetoanaerobium	2463.51	2941.85	0.837401	0.406605	1
lysine_p	acetoanaerobium	intest_surgery1	-0.0767597	0.0784661	-0.978253	0.332958	1
phenylalanine_p	acetoanaerobium	(Intercept)	-3.27995	0.0507311	-64.6537	1.40669858140905e-47	1
phenylalanine_p	acetoanaerobium	acetoanaerobium	4389.27	2397.91	1.83046	0.0735266	1
phenylalanine_p	acetoanaerobium	intest_surgery1	-0.0866185	0.063958	-1.3543	0.182115	1
pyruvate_p	acetoanaerobium	(Intercept)	-3.2161	0.0973309	-33.043	3.4656889506025e-34	1
pyruvate_p	acetoanaerobium	acetoanaerobium	-7092.84	4600.55	-1.54174	0.129844	1
pyruvate_p	acetoanaerobium	intest_surgery1	0.0600877	0.122708	0.489682	0.626637	1
tryptophan_p	acetoanaerobium	(Intercept)	-3.39729	0.0639531	-53.1216	1.27347160069284e-43	1
tryptophan_p	acetoanaerobium	acetoanaerobium	5931.4	3022.88	1.96217	0.0556791	1
tryptophan_p	acetoanaerobium	intest_surgery1	-0.143065	0.0806273	-1.7744	0.0824742	1
tyrosine_p	acetoanaerobium	(Intercept)	-3.07589	0.080973	-37.9866	6.2341524217122e-37	1
tyrosine_p	acetoanaerobium	acetoanaerobium	5110.52	3827.36	1.33526	0.188223	1
tyrosine_p	acetoanaerobium	intest_surgery1	-0.143289	0.102085	-1.40363	0.167003	1
valine_p	acetoanaerobium	(Intercept)	-1.83058	0.0692983	-26.4159	7.55963744175375e-30	1
valine_p	acetoanaerobium	acetoanaerobium	5675.47	3275.53	1.73269	0.0897091	1
valine_p	acetoanaerobium	intest_surgery1	-0.15624	0.0873661	-1.78834	0.0801685	1
acetate_s	acetoanaerobium	(Intercept)	4.13369	0.103762	39.8383	7.11203263477705e-38	1
acetate_s	acetoanaerobium	acetoanaerobium	3021.93	4904.52	0.616153	0.540767	1
acetate_s	acetoanaerobium	intest_surgery1	0.130435	0.130815	0.997091	0.323826	1
alanine_s	acetoanaerobium	(Intercept)	1.17524	0.126358	9.30087	3.14867402935698e-12	1
alanine_s	acetoanaerobium	acetoanaerobium	-8714.51	5972.58	-1.45909	0.151193	1
alanine_s	acetoanaerobium	intest_surgery1	0.38535	0.159303	2.41897	0.0194893	1
aspartate_s	acetoanaerobium	(Intercept)	0.678806	0.104255	6.51101	4.51736356309468e-08	1
aspartate_s	acetoanaerobium	acetoanaerobium	-8172.51	4927.84	-1.65844	0.10389	1
aspartate_s	acetoanaerobium	intest_surgery1	-0.187757	0.131437	-1.42849	0.159762	1
butyrate_s	acetoanaerobium	(Intercept)	2.48557	0.166277	14.9484	1.75088827715175e-19	1
butyrate_s	acetoanaerobium	acetoanaerobium	3660.64	7859.41	0.465766	0.643535	1
butyrate_s	acetoanaerobium	intest_surgery1	-0.376111	0.209629	-1.79417	0.0792195	1
formate_s	acetoanaerobium	(Intercept)	-1.35695	0.108072	-12.5559	1.2678947896334e-16	1
formate_s	acetoanaerobium	acetoanaerobium	1664.49	5108.25	0.325843	0.74599	1
formate_s	acetoanaerobium	intest_surgery1	-0.101014	0.136249	-0.741389	0.462146	1
glucose_s	acetoanaerobium	(Intercept)	1.04362	0.202668	5.14941	5.06699447186448e-06	1
glucose_s	acetoanaerobium	acetoanaerobium	4657.02	9579.55	0.486141	0.629126	1
glucose_s	acetoanaerobium	intest_surgery1	0.528444	0.255509	2.0682	0.0441488	1
glutamate_s	acetoanaerobium	(Intercept)	1.3004	0.186557	6.97052	9.05987633918496e-09	1
glutamate_s	acetoanaerobium	acetoanaerobium	924.596	8818.02	0.104853	0.916939	1
glutamate_s	acetoanaerobium	intest_surgery1	0.0870708	0.235198	0.370203	0.712895	1
glutamine_s	acetoanaerobium	(Intercept)	0.590004	0.0953276	6.18923	1.39109055347075e-07	1
glutamine_s	acetoanaerobium	acetoanaerobium	-13372.8	4505.86	-2.96787	0.00470574	1
glutamine_s	acetoanaerobium	intest_surgery1	-0.130197	0.120182	-1.08333	0.284187	1
histidine_s	acetoanaerobium	(Intercept)	-0.618545	0.149952	-4.12495	0.000150013	1
histidine_s	acetoanaerobium	acetoanaerobium	-6780.09	7087.81	-0.956585	0.343672	1
histidine_s	acetoanaerobium	intest_surgery1	0.0879438	0.189049	0.465191	0.643943	1
isoleucine_s	acetoanaerobium	(Intercept)	0.749126	0.105415	7.10644	5.63729487611007e-09	1
isoleucine_s	acetoanaerobium	acetoanaerobium	-6226.66	4982.67	-1.24966	0.217609	1
isoleucine_s	acetoanaerobium	intest_surgery1	0.0596375	0.1329	0.448741	0.65568	1
lactate_s	acetoanaerobium	(Intercept)	0.822876	0.16598	4.95769	9.70450198255536e-06	1
lactate_s	acetoanaerobium	acetoanaerobium	-6055.98	7845.38	-0.771917	0.444028	1
lactate_s	acetoanaerobium	intest_surgery1	0.198789	0.209255	0.949985	0.34698	1
leucine_s	acetoanaerobium	(Intercept)	1.02423	0.110581	9.26232	3.57754609475666e-12	1
leucine_s	acetoanaerobium	acetoanaerobium	-5108.05	5226.83	-0.977276	0.333436	1
leucine_s	acetoanaerobium	intest_surgery1	0.152411	0.139412	1.09324	0.279859	1
methylamine_s	acetoanaerobium	(Intercept)	-1.64301	0.281819	-5.83	4.86304302973458e-07	1
methylamine_s	acetoanaerobium	acetoanaerobium	1160.57	13320.8	0.0871249	0.930942	1
methylamine_s	acetoanaerobium	intest_surgery1	-0.753688	0.355297	-2.12129	0.0392002	1
phenylalanine_s	acetoanaerobium	(Intercept)	0.47936	0.106756	4.49026	4.60245919797388e-05	1
phenylalanine_s	acetoanaerobium	acetoanaerobium	-5327.49	5046.02	-1.05578	0.296465	1
phenylalanine_s	acetoanaerobium	intest_surgery1	0.234737	0.134589	1.7441	0.0876799	1
propionate_s	acetoanaerobium	(Intercept)	3.08566	0.186505	16.5447	3.13782193955698e-21	1
propionate_s	acetoanaerobium	acetoanaerobium	-15282.1	8815.54	-1.73354	0.0895568	1
propionate_s	acetoanaerobium	intest_surgery1	0.00465542	0.235131	0.0197993	0.984287	1
succinate_s	acetoanaerobium	(Intercept)	-0.619406	0.489713	-1.26484	0.212166	1
succinate_s	acetoanaerobium	acetoanaerobium	-12889.6	23147.3	-0.55685	0.580272	1
succinate_s	acetoanaerobium	intest_surgery1	1.70675	0.617393	2.76445	0.00811925	1
trimethylamine_s	acetoanaerobium	(Intercept)	-1.70046	0.199807	-8.51053	4.4545829688381e-11	1
trimethylamine_s	acetoanaerobium	acetoanaerobium	-4047.76	9444.29	-0.428593	0.670177	1
trimethylamine_s	acetoanaerobium	intest_surgery1	0.251691	0.251902	0.999165	0.322831	1
tyrosine_s	acetoanaerobium	(Intercept)	0.602862	0.106774	5.64614	9.20004262533697e-07	1
tyrosine_s	acetoanaerobium	acetoanaerobium	-9264.4	5046.9	-1.83566	0.0727391	1
tyrosine_s	acetoanaerobium	intest_surgery1	0.14779	0.134613	1.09789	0.277847	1
valine_s	acetoanaerobium	(Intercept)	1.17381	0.118584	9.89855	4.44601694662378e-13	1
valine_s	acetoanaerobium	acetoanaerobium	-6303.28	5605.13	-1.12456	0.266488	1
valine_s	acetoanaerobium	intest_surgery1	0.173749	0.149502	1.16219	0.251027	1
lithocholenic_acid_ba	acetoanaerobium	(Intercept)	3.8451	0.545614	7.0473	6.92925162444652e-09	1
lithocholenic_acid_ba	acetoanaerobium	acetoanaerobium	-16340.9	25789.6	-0.633626	0.529397	1
lithocholenic_acid_ba	acetoanaerobium	intest_surgery1	-2.24701	0.687869	-3.26662	0.00203649	1
isolithocholic_acid_ba	acetoanaerobium	(Intercept)	6.15979	0.499565	12.3303	2.44759234636881e-16	1
isolithocholic_acid_ba	acetoanaerobium	acetoanaerobium	-6691.46	23613	-0.28338	0.77813	1
isolithocholic_acid_ba	acetoanaerobium	intest_surgery1	-2.14814	0.629814	-3.41075	0.00134023	1
allolithocholic_acid_ba	acetoanaerobium	(Intercept)	2.27249	0.375479	6.05224	2.24361391959726e-07	1
allolithocholic_acid_ba	acetoanaerobium	acetoanaerobium	-24631.6	17747.8	-1.38787	0.171722	1
allolithocholic_acid_ba	acetoanaerobium	intest_surgery1	-1.93566	0.473375	-4.08906	0.000168146	1
x3a_12a_23_nordeoxycholic_acid_ba	acetoanaerobium	(Intercept)	-3.9162	0.585791	-6.68532	2.45523544010089e-08	1
x3a_12a_23_nordeoxycholic_acid_ba	acetoanaerobium	acetoanaerobium	23568.2	27688.7	0.851186	0.398982	1
x3a_12a_23_nordeoxycholic_acid_ba	acetoanaerobium	intest_surgery1	-0.748145	0.738522	-1.01303	0.316233	1
x3_6_diketocholanic_acid_ba	acetoanaerobium	(Intercept)	3.21431	0.415514	7.73573	6.33342025350238e-10	1
x3_6_diketocholanic_acid_ba	acetoanaerobium	acetoanaerobium	-2039.84	19640.1	-0.103861	0.917722	1
x3_6_diketocholanic_acid_ba	acetoanaerobium	intest_surgery1	-0.964022	0.523849	-1.84026	0.0720483	1
x8_14_5b_cholenic_acid_3a_12a_diol_ba	acetoanaerobium	(Intercept)	4.95573	0.561177	8.83095	1.50973560472984e-11	1
x8_14_5b_cholenic_acid_3a_12a_diol_ba	acetoanaerobium	acetoanaerobium	-8200.24	26525.2	-0.309149	0.758575	1
x8_14_5b_cholenic_acid_3a_12a_diol_ba	acetoanaerobium	intest_surgery1	-2.3627	0.707491	-3.33955	0.00164976	1
x5b_cholenic_acid_7a_ol_3_one_ba	acetoanaerobium	(Intercept)	3.73825	0.197104	18.9659	1.16226652762716e-23	1
x5b_cholenic_acid_7a_ol_3_one_ba	acetoanaerobium	acetoanaerobium	2626.35	9316.52	0.281902	0.779256	1
x5b_cholenic_acid_7a_ol_3_one_ba	acetoanaerobium	intest_surgery1	-0.0933656	0.248494	-0.375727	0.708811	1
x5a_cholanic_acid_3a_ol_6_one_ba	acetoanaerobium	(Intercept)	3.16503	1.0041	3.1521	0.00282126	1
x5a_cholanic_acid_3a_ol_6_one_ba	acetoanaerobium	acetoanaerobium	-20996.9	47461.1	-0.442401	0.660228	1
x5a_cholanic_acid_3a_ol_6_one_ba	acetoanaerobium	intest_surgery1	-2.22062	1.2659	-1.75418	0.0859173	1
x3a_hydroxy_12_ketolithocholic_acid_ba	acetoanaerobium	(Intercept)	0.683541	0.730979	0.935103	0.354515	1
x3a_hydroxy_12_ketolithocholic_acid_ba	acetoanaerobium	acetoanaerobium	21465.4	34551.3	0.621263	0.537428	1
x3a_hydroxy_12_ketolithocholic_acid_ba	acetoanaerobium	intest_surgery1	3.42657	0.921564	3.71821	0.000533803	1
lithocholic_acid_ba	acetoanaerobium	(Intercept)	6.1873	0.50026	12.3682	2.1909137480734e-16	1
lithocholic_acid_ba	acetoanaerobium	acetoanaerobium	-6718.53	23645.8	-0.284131	0.777558	1
lithocholic_acid_ba	acetoanaerobium	intest_surgery1	-2.1517	0.630691	-3.41166	0.00133666	1
x5b_cholanic_acid_3b_12a_diol_ba	acetoanaerobium	(Intercept)	2.46524	0.32599	7.56231	1.15438728106735e-09	1
x5b_cholanic_acid_3b_12a_diol_ba	acetoanaerobium	acetoanaerobium	-14892.5	15408.6	-0.966505	0.338739	1
x5b_cholanic_acid_3b_12a_diol_ba	acetoanaerobium	intest_surgery1	0.520285	0.410985	1.26595	0.211771	1
chenodeoxycholic_acid_cdca_ba	acetoanaerobium	(Intercept)	0.734333	1.04806	0.700657	0.486971	1
chenodeoxycholic_acid_cdca_ba	acetoanaerobium	acetoanaerobium	3234.77	49538.9	0.0652976	0.948214	1
chenodeoxycholic_acid_cdca_ba	acetoanaerobium	intest_surgery1	5.71936	1.32132	4.32852	7.79930177245423e-05	1
deoxycholic_acid_dca_ba	acetoanaerobium	(Intercept)	6.61748	1.1608	5.70081	7.61340654103956e-07	1
deoxycholic_acid_dca_ba	acetoanaerobium	acetoanaerobium	-37381.3	54867.5	-0.681302	0.499024	1
deoxycholic_acid_dca_ba	acetoanaerobium	intest_surgery1	-4.8159	1.46345	-3.29079	0.00189968	1
hyodeoxycholic_acid_ba	acetoanaerobium	(Intercept)	4.45696	0.308886	14.4291	6.89302354903462e-19	1
hyodeoxycholic_acid_ba	acetoanaerobium	acetoanaerobium	-24043	14600.1	-1.64676	0.106278	1
hyodeoxycholic_acid_ba	acetoanaerobium	intest_surgery1	-0.0861387	0.389421	-0.221197	0.825897	1
isodeoxycholic_acid_ba	acetoanaerobium	(Intercept)	-2.07248	0.743675	-2.7868	0.0076549	1
isodeoxycholic_acid_ba	acetoanaerobium	acetoanaerobium	-54249.4	35151.4	-1.54331	0.129463	1
isodeoxycholic_acid_ba	acetoanaerobium	intest_surgery1	1.8337	0.93757	1.9558	0.0564477	1
murocholic_acid_muro_ca_ba	acetoanaerobium	(Intercept)	1.74828	0.641146	2.72681	0.00896049	1
murocholic_acid_muro_ca_ba	acetoanaerobium	acetoanaerobium	-34772.2	30305.1	-1.1474	0.257022	1
murocholic_acid_muro_ca_ba	acetoanaerobium	intest_surgery1	2.21168	0.808309	2.73619	0.00874372	1
ursodeoxycholic_acid_udca_ba	acetoanaerobium	(Intercept)	2.98082	0.342465	8.70401	2.31485327276726e-11	1
ursodeoxycholic_acid_udca_ba	acetoanaerobium	acetoanaerobium	-18488.5	16187.3	-1.14216	0.259173	1
ursodeoxycholic_acid_udca_ba	acetoanaerobium	intest_surgery1	1.60439	0.431754	3.71599	0.000537443	1
x3a_hydroxy_7_12_diketo_cholanic_acid_ba	acetoanaerobium	(Intercept)	-2.14253	0.554452	-3.86422	0.00034057	1
x3a_hydroxy_7_12_diketo_cholanic_acid_ba	acetoanaerobium	acetoanaerobium	-23181	26207.4	-0.884522	0.380917	1
x3a_hydroxy_7_12_diketo_cholanic_acid_ba	acetoanaerobium	intest_surgery1	2.26878	0.699013	3.2457	0.00216239	1
x5b_cholanic_acid_3a_6a_diol_7_one_ba	acetoanaerobium	(Intercept)	-1.69426	0.547927	-3.09212	0.00333847	1
x5b_cholanic_acid_3a_6a_diol_7_one_ba	acetoanaerobium	acetoanaerobium	-28535.1	25898.9	-1.10179	0.276165	1
x5b_cholanic_acid_3a_6a_diol_7_one_ba	acetoanaerobium	intest_surgery1	-0.790975	0.690786	-1.14504	0.257991	1
x3_dehydrocholic_acid_ba	acetoanaerobium	(Intercept)	-0.343981	0.654694	-0.525407	0.60177	1
x3_dehydrocholic_acid_ba	acetoanaerobium	acetoanaerobium	-2198.85	30945.5	-0.0710557	0.943655	1
x3_dehydrocholic_acid_ba	acetoanaerobium	intest_surgery1	3.51615	0.825389	4.25999	9.73267772540798e-05	1
cholic_acid_ca_ba	acetoanaerobium	(Intercept)	2.83288	0.569114	4.97771	9.07050865900481e-06	1
cholic_acid_ca_ba	acetoanaerobium	acetoanaerobium	8219.87	26900.4	0.305567	0.761283	1
cholic_acid_ca_ba	acetoanaerobium	intest_surgery1	3.15004	0.717497	4.39031	6.3806977441148e-05	1
hyocholic_acid_hca_ba	acetoanaerobium	(Intercept)	0.75355	0.254542	2.96041	0.00480258	1
hyocholic_acid_hca_ba	acetoanaerobium	acetoanaerobium	11052.6	12031.5	0.918639	0.362975	1
hyocholic_acid_hca_ba	acetoanaerobium	intest_surgery1	-0.36388	0.320908	-1.13391	0.262584	1
glycoursocholanic_acid_ba	acetoanaerobium	(Intercept)	-4.08333	0.58626	-6.96505	9.23458453628992e-09	1
glycoursocholanic_acid_ba	acetoanaerobium	acetoanaerobium	33906.2	27710.8	1.22357	0.227213	1
glycoursocholanic_acid_ba	acetoanaerobium	intest_surgery1	-1.69699	0.739113	-2.29598	0.0261827	1
glycolithocholic_acid_glca_ba	acetoanaerobium	(Intercept)	-1.99248	0.326322	-6.10587	1.86085992739774e-07	1
glycolithocholic_acid_glca_ba	acetoanaerobium	acetoanaerobium	-10119.6	15424.3	-0.656082	0.51497	1
glycolithocholic_acid_glca_ba	acetoanaerobium	intest_surgery1	-0.218299	0.411403	-0.53062	0.59818	1
glycoursodeoxycholic_acid_gudca_ba	acetoanaerobium	(Intercept)	-4.13194	0.755923	-5.46609	1.71288950174409e-06	1
glycoursodeoxycholic_acid_gudca_ba	acetoanaerobium	acetoanaerobium	-47293.9	35730.3	-1.32364	0.192026	1
glycoursodeoxycholic_acid_gudca_ba	acetoanaerobium	intest_surgery1	2.57127	0.953011	2.69805	0.00965649	1
glycochenodeoxycholic_acid_gcdca_ba	acetoanaerobium	(Intercept)	1.25041	0.333225	3.75244	0.000480757	1
glycochenodeoxycholic_acid_gcdca_ba	acetoanaerobium	acetoanaerobium	-1371.12	15750.6	-0.0870521	0.931	1
glycochenodeoxycholic_acid_gcdca_ba	acetoanaerobium	intest_surgery1	1.07837	0.420106	2.56691	0.0135052	1
glycodeoxycholic_acid_gdca_ba	acetoanaerobium	(Intercept)	0.274363	0.607794	0.451408	0.653772	1
glycodeoxycholic_acid_gdca_ba	acetoanaerobium	acetoanaerobium	137.067	28728.7	0.00477111	0.996213	1
glycodeoxycholic_acid_gdca_ba	acetoanaerobium	intest_surgery1	-1.49502	0.766262	-1.95106	0.0570251	1
glycocholic_acid_gca_ba	acetoanaerobium	(Intercept)	0.561914	0.335424	1.67524	0.10053	1
glycocholic_acid_gca_ba	acetoanaerobium	acetoanaerobium	762.735	15854.5	0.0481084	0.961834	1
glycocholic_acid_gca_ba	acetoanaerobium	intest_surgery1	0.942372	0.422877	2.22848	0.0306699	1
taurolithocholic_acid_tlca_ba	acetoanaerobium	(Intercept)	-2.38394	0.567482	-4.2009	0.000117684	1
taurolithocholic_acid_tlca_ba	acetoanaerobium	acetoanaerobium	-9704.16	26823.2	-0.361782	0.719136	1
taurolithocholic_acid_tlca_ba	acetoanaerobium	intest_surgery1	-0.998846	0.715439	-1.39613	0.169235	1
taurochenodeoxycholic_acid_tcdca_ba	acetoanaerobium	(Intercept)	-0.0521789	0.467944	-0.111507	0.911689	1
taurochenodeoxycholic_acid_tcdca_ba	acetoanaerobium	acetoanaerobium	5318.87	22118.4	0.240473	0.81101	1
taurochenodeoxycholic_acid_tcdca_ba	acetoanaerobium	intest_surgery1	0.882231	0.58995	1.49543	0.141486	1
taurodeoxycholic_acid_tdca_ba	acetoanaerobium	(Intercept)	-0.366053	0.531952	-0.688131	0.494752	1
taurodeoxycholic_acid_tdca_ba	acetoanaerobium	acetoanaerobium	-6910.1	25143.8	-0.274823	0.784657	1
taurodeoxycholic_acid_tdca_ba	acetoanaerobium	intest_surgery1	-1.88576	0.670646	-2.81186	0.00716351	1
tauro_w_muricholic_acid_tw_mca_ba	acetoanaerobium	(Intercept)	-3.91961	0.817596	-4.79407	1.6816551309203e-05	1
tauro_w_muricholic_acid_tw_mca_ba	acetoanaerobium	acetoanaerobium	4017.28	38645.4	0.103952	0.91765	1
tauro_w_muricholic_acid_tw_mca_ba	acetoanaerobium	intest_surgery1	1.31501	1.03076	1.27576	0.20831	1
taurocholic_acid_tca_ba	acetoanaerobium	(Intercept)	0.778985	0.396685	1.96374	0.055491	1
taurocholic_acid_tca_ba	acetoanaerobium	acetoanaerobium	411.119	18750.1	0.0219262	0.9826	1
taurocholic_acid_tca_ba	acetoanaerobium	intest_surgery1	0.849105	0.500111	1.69783	0.0961517	1
x2_hydroxybutyrate_p	acetobacter	(Intercept)	-3.38864	0.150102	-22.5756	7.15940763529392e-27	1
x2_hydroxybutyrate_p	acetobacter	acetobacter	-1812.07	3093.59	-0.585751	0.560845	1
x2_hydroxybutyrate_p	acetobacter	intest_surgery1	-0.273607	0.157601	-1.73607	0.0891031	1
x3_hydroxybutyrate_p	acetobacter	(Intercept)	-3.19287	0.258117	-12.3698	2.18032325339269e-16	1
x3_hydroxybutyrate_p	acetobacter	acetobacter	2905.72	5319.78	0.546211	0.587505	1
x3_hydroxybutyrate_p	acetobacter	intest_surgery1	-0.239071	0.271013	-0.882137	0.382192	1
x3_hydroxyisovalerate_p	acetobacter	(Intercept)	-4.64838	0.0255315	-182.064	1.29766562222861e-68	1
x3_hydroxyisovalerate_p	acetobacter	acetobacter	158.831	526.202	0.301843	0.764103	1
x3_hydroxyisovalerate_p	acetobacter	intest_surgery1	-0.0261528	0.0268071	-0.975592	0.334262	1
acetate_p	acetobacter	(Intercept)	-2.75987	0.0641606	-43.0151	2.12285123821774e-39	1
acetate_p	acetobacter	acetobacter	610.439	1322.34	0.461635	0.646473	1
acetate_p	acetobacter	intest_surgery1	-0.0699019	0.0673661	-1.03764	0.304746	1
acetoacetate_p	acetobacter	(Intercept)	-3.59671	0.148144	-24.2784	3.05863371426855e-28	1
acetoacetate_p	acetobacter	acetobacter	-2270.43	3053.24	-0.743611	0.460813	1
acetoacetate_p	acetobacter	intest_surgery1	-0.146273	0.155546	-0.940382	0.35183	1
alanine_p	acetobacter	(Intercept)	-1.41541	0.0650448	-21.7605	3.47790200205932e-26	1
alanine_p	acetobacter	acetobacter	-840.432	1340.57	-0.626922	0.533744	1
alanine_p	acetobacter	intest_surgery1	0.0595748	0.0682946	0.872322	0.387468	1
citrate_p	acetobacter	(Intercept)	-2.3801	0.077361	-30.7662	8.58831765548312e-33	1
citrate_p	acetobacter	acetobacter	189.78	1594.4	0.119029	0.90576	1
citrate_p	acetobacter	intest_surgery1	-0.108809	0.0812261	-1.33959	0.186821	1
creatinine_p	acetobacter	(Intercept)	-3.5921	0.0857866	-41.8725	7.29043905096181e-39	1
creatinine_p	acetobacter	acetobacter	-1053.17	1768.05	-0.595667	0.554256	1
creatinine_p	acetobacter	intest_surgery1	-0.163102	0.0900726	-1.81079	0.0765686	1
formate_p	acetobacter	(Intercept)	-2.89154	0.0799423	-36.1703	5.78722983724076e-36	1
formate_p	acetobacter	acetobacter	619.591	1647.6	0.376056	0.708567	1
formate_p	acetobacter	intest_surgery1	0.137112	0.0839364	1.63352	0.109041	1
glucose_p	acetobacter	(Intercept)	1.15113	0.0290849	39.5783	9.58980185674406e-38	1
glucose_p	acetobacter	acetobacter	-54.9496	599.437	-0.0916687	0.927351	1
glucose_p	acetobacter	intest_surgery1	-0.0546659	0.030538	-1.79009	0.0798822	1
glutamine_p	acetobacter	(Intercept)	-1.06873	0.0418296	-25.5497	3.27844569349771e-29	1
glutamine_p	acetobacter	acetobacter	65.8666	862.105	0.0764021	0.939423	1
glutamine_p	acetobacter	intest_surgery1	0.0446249	0.0439195	1.01606	0.314803	1
glycine_p	acetobacter	(Intercept)	-1.72324	0.0711944	-24.2047	3.4921200770809e-28	1
glycine_p	acetobacter	acetobacter	-1019.56	1467.31	-0.694853	0.490569	1
glycine_p	acetobacter	intest_surgery1	0.117658	0.0747515	1.57399	0.122197	1
histidine_p	acetobacter	(Intercept)	-2.8301	0.0562065	-50.3518	1.51189600743617e-42	1
histidine_p	acetobacter	acetobacter	-1538.17	1158.41	-1.32783	0.190647	1
histidine_p	acetobacter	intest_surgery1	-0.0170001	0.0590147	-0.288066	0.774563	1
isoleucine_p	acetobacter	(Intercept)	-2.94436	0.0981209	-30.0074	2.62691306998976e-32	1
isoleucine_p	acetobacter	acetobacter	-4434.97	2022.26	-2.19307	0.0332856	1
isoleucine_p	acetobacter	intest_surgery1	-0.155029	0.103023	-1.5048	0.139067	1
isopropanol_p	acetobacter	(Intercept)	-4.80515	0.354649	-13.549	7.56884182398628e-18	1
isopropanol_p	acetobacter	acetobacter	-8331.14	7309.29	-1.1398	0.260145	1
isopropanol_p	acetobacter	intest_surgery1	-0.016244	0.372368	-0.0436234	0.965389	1
lactate_p	acetobacter	(Intercept)	-0.183944	0.104236	-1.76469	0.084114	1
lactate_p	acetobacter	acetobacter	-3257.47	2148.3	-1.5163	0.13614	1
lactate_p	acetobacter	intest_surgery1	0.143636	0.109444	1.31242	0.195752	1
leucine_p	acetobacter	(Intercept)	-2.51346	0.0890647	-28.2206	4.05479410248469e-31	1
leucine_p	acetobacter	acetobacter	-2710.05	1835.62	-1.47637	0.146513	1
leucine_p	acetobacter	intest_surgery1	-0.136261	0.0935146	-1.45711	0.151735	1
lysine_p	acetobacter	(Intercept)	-2.17643	0.0709066	-30.6943	9.53745919727125e-33	1
lysine_p	acetobacter	acetobacter	-3079.85	1461.38	-2.1075	0.0404368	1
lysine_p	acetobacter	intest_surgery1	-0.0738967	0.0744492	-0.992578	0.325998	1
phenylalanine_p	acetobacter	(Intercept)	-3.15813	0.0605217	-52.1818	2.90661293411461e-43	1
phenylalanine_p	acetobacter	acetobacter	-1979.39	1247.35	-1.58688	0.119245	1
phenylalanine_p	acetobacter	intest_surgery1	-0.0713199	0.0635455	-1.12234	0.267417	1
pyruvate_p	acetobacter	(Intercept)	-3.18238	0.115528	-27.5465	1.18557288470625e-30	1
pyruvate_p	acetobacter	acetobacter	-3413.75	2381.01	-1.43374	0.158267	1
pyruvate_p	acetobacter	intest_surgery1	0.0161443	0.1213	0.133094	0.894687	1
tryptophan_p	acetobacter	(Intercept)	-3.25682	0.0774397	-42.0562	5.96558631107596e-39	1
tryptophan_p	acetobacter	acetobacter	-1982.26	1596.02	-1.242	0.220399	1
tryptophan_p	acetobacter	intest_surgery1	-0.120378	0.0813087	-1.48051	0.14541	1
tyrosine_p	acetobacter	(Intercept)	-2.95104	0.096747	-30.5027	1.26268261561617e-32	1
tyrosine_p	acetobacter	acetobacter	-1817.42	1993.95	-0.911467	0.366701	1
tyrosine_p	acetobacter	intest_surgery1	-0.12406	0.101581	-1.22129	0.228066	1
valine_p	acetobacter	(Intercept)	-1.68187	0.082973	-20.2701	7.12572365767981e-25	1
valine_p	acetobacter	acetobacter	-2306.77	1710.07	-1.34894	0.18382	1
valine_p	acetobacter	intest_surgery1	-0.135724	0.0871185	-1.55793	0.12596	1
acetate_s	acetobacter	(Intercept)	4.21556	0.122907	34.2986	6.42981083119752e-35	1
acetate_s	acetobacter	acetobacter	-1305.39	2533.11	-0.515333	0.608736	1
acetate_s	acetobacter	intest_surgery1	0.141134	0.129048	1.09366	0.27968	1
alanine_s	acetobacter	(Intercept)	1.17238	0.151434	7.74184	6.20112639025265e-10	1
alanine_s	acetobacter	acetobacter	-2923.92	3121.04	-0.936842	0.353629	1
alanine_s	acetobacter	intest_surgery1	0.335052	0.159	2.10725	0.0404592	1
aspartate_s	acetobacter	(Intercept)	0.595277	0.126865	4.69219	2.36211022401739e-05	1
aspartate_s	acetobacter	acetobacter	-423.721	2614.68	-0.162054	0.871958	1
aspartate_s	acetobacter	intest_surgery1	-0.228187	0.133204	-1.71307	0.0932901	1
butyrate_s	acetobacter	(Intercept)	2.29566	0.191371	11.9959	6.56799516423274e-16	1
butyrate_s	acetobacter	acetobacter	6708.78	3944.14	1.70095	0.0955608	1
butyrate_s	acetobacter	intest_surgery1	-0.339051	0.200932	-1.68739	0.0981554	1
formate_s	acetobacter	(Intercept)	-1.26053	0.127061	-9.92067	4.1386839830545e-13	1
formate_s	acetobacter	acetobacter	-2190.87	2618.71	-0.836622	0.407039	1
formate_s	acetobacter	intest_surgery1	-0.0993989	0.133409	-0.745071	0.459939	1
glucose_s	acetobacter	(Intercept)	0.94635	0.238355	3.97034	0.000244569	1
glucose_s	acetobacter	acetobacter	4395.91	4912.47	0.894847	0.375429	1
glucose_s	acetobacter	intest_surgery1	0.56356	0.250264	2.25186	0.0290435	1
glutamate_s	acetobacter	(Intercept)	1.22102	0.219974	5.55074	1.27933204035375e-06	1
glutamate_s	acetobacter	acetobacter	2595.38	4533.64	0.572471	0.569732	1
glutamate_s	acetobacter	intest_surgery1	0.0990501	0.230964	0.428854	0.669988	1
glutamine_s	acetobacter	(Intercept)	0.396446	0.122716	3.23059	0.00225782	1
glutamine_s	acetobacter	acetobacter	937.736	2529.17	0.370768	0.712476	1
glutamine_s	acetobacter	intest_surgery1	-0.191612	0.128847	-1.48712	0.14366	1
histidine_s	acetobacter	(Intercept)	-0.519938	0.175354	-2.96509	0.00474169	1
histidine_s	acetobacter	acetobacter	-5166.55	3614.02	-1.42959	0.15945	1
histidine_s	acetobacter	intest_surgery1	0.0404052	0.184115	0.219457	0.827245	1
isoleucine_s	acetobacter	(Intercept)	0.709293	0.12657	5.60394	1.06457975048655e-06	1
isoleucine_s	acetobacter	acetobacter	-1005.61	2608.61	-0.385496	0.701609	1
isoleucine_s	acetobacter	intest_surgery1	0.0268489	0.132894	0.202032	0.840763	1
lactate_s	acetobacter	(Intercept)	0.839085	0.196781	4.26405	9.60618000719371e-05	1
lactate_s	acetobacter	acetobacter	-2553.81	4055.64	-0.629694	0.531944	1
lactate_s	acetobacter	intest_surgery1	0.162318	0.206613	0.785617	0.436035	1
leucine_s	acetobacter	(Intercept)	1.02565	0.131532	7.79777	5.11199768044818e-10	1
leucine_s	acetobacter	acetobacter	-1802.79	2710.86	-0.665026	0.509284	1
leucine_s	acetobacter	intest_surgery1	0.12267	0.138103	0.88825	0.37893	1
methylamine_s	acetobacter	(Intercept)	-2.1414	0.316815	-6.75914	1.89656579489271e-08	1
methylamine_s	acetobacter	acetobacter	14692.7	6529.53	2.2502	0.0291568	1
methylamine_s	acetobacter	intest_surgery1	-0.705411	0.332644	-2.12062	0.0392596	1
phenylalanine_s	acetobacter	(Intercept)	0.530956	0.125615	4.22685	0.000108278	1
phenylalanine_s	acetobacter	acetobacter	-3317.34	2588.91	-1.28136	0.206352	1
phenylalanine_s	acetobacter	intest_surgery1	0.199541	0.131891	1.51293	0.136994	1
propionate_s	acetobacter	(Intercept)	2.81382	0.226894	12.4014	1.98787886691026e-16	1
propionate_s	acetobacter	acetobacter	2524.11	4676.27	0.53977	0.591904	1
propionate_s	acetobacter	intest_surgery1	-0.0613055	0.23823	-0.257337	0.798042	1
succinate_s	acetobacter	(Intercept)	0.246818	0.54307	0.454487	0.65157	1
succinate_s	acetobacter	acetobacter	-29287	11192.6	-2.61664	0.0119053	1
succinate_s	acetobacter	intest_surgery1	1.5598	0.570203	2.73551	0.00875913	1
trimethylamine_s	acetobacter	(Intercept)	-1.9328	0.233899	-8.26339	1.0331522193976e-10	1
trimethylamine_s	acetobacter	acetobacter	5266.53	4820.64	1.09249	0.280184	1
trimethylamine_s	acetobacter	intest_surgery1	0.247586	0.245585	1.00815	0.318546	1
tyrosine_s	acetobacter	(Intercept)	0.544259	0.130333	4.17592	0.000127489	1
tyrosine_s	acetobacter	acetobacter	-1515.19	2686.15	-0.564076	0.575384	1
tyrosine_s	acetobacter	intest_surgery1	0.0989495	0.136844	0.72308	0.473214	1
valine_s	acetobacter	(Intercept)	1.19153	0.140897	8.45677	5.34652196752635e-11	1
valine_s	acetobacter	acetobacter	-2682.56	2903.88	-0.923786	0.360316	1
valine_s	acetobacter	intest_surgery1	0.135718	0.147937	0.917409	0.363612	1
lithocholenic_acid_ba	acetobacter	(Intercept)	2.96729	0.633343	4.68512	2.41833817981349e-05	1
lithocholenic_acid_ba	acetobacter	acetobacter	19536.5	13053.1	1.49669	0.14116	1
lithocholenic_acid_ba	acetobacter	intest_surgery1	-2.26859	0.664986	-3.41149	0.00133733	1
isolithocholic_acid_ba	acetobacter	(Intercept)	5.17998	0.562669	9.20608	4.31128444384049e-12	1
isolithocholic_acid_ba	acetobacter	acetobacter	25790.1	11596.6	2.22394	0.0309944	1
isolithocholic_acid_ba	acetobacter	intest_surgery1	-2.10526	0.590781	-3.56353	0.000852129	1
allolithocholic_acid_ba	acetobacter	(Intercept)	1.59552	0.446602	3.57259	0.000829313	1
allolithocholic_acid_ba	acetobacter	acetobacter	10916.7	9204.42	1.18602	0.241575	1
allolithocholic_acid_ba	acetobacter	intest_surgery1	-2.02207	0.468915	-4.31223	8.22181202699105e-05	1
x3a_12a_23_nordeoxycholic_acid_ba	acetobacter	(Intercept)	-4.30105	0.685064	-6.27833	1.01905297054433e-07	1
x3a_12a_23_nordeoxycholic_acid_ba	acetobacter	acetobacter	19166.3	14119.1	1.35747	0.181113	1
x3a_12a_23_nordeoxycholic_acid_ba	acetobacter	intest_surgery1	-0.579389	0.719291	-0.8055	0.424588	1
x3_6_diketocholanic_acid_ba	acetobacter	(Intercept)	2.81968	0.485875	5.8033	5.33552841541756e-07	1
x3_6_diketocholanic_acid_ba	acetobacter	acetobacter	10613.2	10013.8	1.05985	0.294627	1
x3_6_diketocholanic_acid_ba	acetobacter	intest_surgery1	-0.942954	0.51015	-1.84839	0.0708435	1
x8_14_5b_cholenic_acid_3a_12a_diol_ba	acetobacter	(Intercept)	4.16459	0.649565	6.41135	6.40110113141367e-08	1
x8_14_5b_cholenic_acid_3a_12a_diol_ba	acetobacter	acetobacter	19858.8	13387.5	1.48339	0.144647	1
x8_14_5b_cholenic_acid_3a_12a_diol_ba	acetobacter	intest_surgery1	-2.3443	0.682019	-3.4373	0.00123964	1
x5b_cholenic_acid_7a_ol_3_one_ba	acetobacter	(Intercept)	3.64684	0.232049	15.7158	2.44532673509223e-20	1
x5b_cholenic_acid_7a_ol_3_one_ba	acetobacter	acetobacter	3527.36	4782.51	0.737555	0.464451	1
x5b_cholenic_acid_7a_ol_3_one_ba	acetobacter	intest_surgery1	-0.0705149	0.243643	-0.289419	0.773533	1
x5a_cholanic_acid_3a_ol_6_one_ba	acetobacter	(Intercept)	1.54105	1.15742	1.33145	0.189462	1
x5a_cholanic_acid_3a_ol_6_one_ba	acetobacter	acetobacter	39328.4	23854.2	1.6487	0.105879	1
x5a_cholanic_acid_3a_ol_6_one_ba	acetobacter	intest_surgery1	-2.20701	1.21524	-1.8161	0.075736	1
x3a_hydroxy_12_ketolithocholic_acid_ba	acetobacter	(Intercept)	1.99955	0.841398	2.37646	0.0216051	1
x3a_hydroxy_12_ketolithocholic_acid_ba	acetobacter	acetobacter	-30334.8	17341.1	-1.7493	0.0867675	1
x3a_hydroxy_12_ketolithocholic_acid_ba	acetobacter	intest_surgery1	3.44135	0.883436	3.89541	0.000309108	1
lithocholic_acid_ba	acetobacter	(Intercept)	5.20549	0.563428	9.23897	3.86548020602942e-12	1
lithocholic_acid_ba	acetobacter	acetobacter	25837.8	11612.2	2.22505	0.0309146	1
lithocholic_acid_ba	acetobacter	intest_surgery1	-2.10882	0.591578	-3.56473	0.000849055	1
x5b_cholanic_acid_3b_12a_diol_ba	acetobacter	(Intercept)	2.09257	0.387504	5.40012	2.14922317931169e-06	1
x5b_cholanic_acid_3b_12a_diol_ba	acetobacter	acetobacter	5550.06	7986.41	0.694938	0.490516	1
x5b_cholanic_acid_3b_12a_diol_ba	acetobacter	intest_surgery1	0.464988	0.406864	1.14286	0.258885	1
chenodeoxycholic_acid_cdca_ba	acetobacter	(Intercept)	1.189	1.23713	0.961094	0.341423	1
chenodeoxycholic_acid_cdca_ba	acetobacter	acetobacter	-11922.7	25497.2	-0.467609	0.642225	1
chenodeoxycholic_acid_cdca_ba	acetobacter	intest_surgery1	5.70021	1.29894	4.38835	6.42170185375745e-05	1
deoxycholic_acid_dca_ba	acetobacter	(Intercept)	4.04784	1.3113	3.08689	0.00338759	1
deoxycholic_acid_dca_ba	acetobacter	acetobacter	60795.1	27025.8	2.24952	0.0292032	1
deoxycholic_acid_dca_ba	acetobacter	intest_surgery1	-4.81846	1.37682	-3.49971	0.00103075	1
hyodeoxycholic_acid_ba	acetobacter	(Intercept)	3.81186	0.368828	10.3351	1.09365588697768e-13	1
hyodeoxycholic_acid_ba	acetobacter	acetobacter	10206	7601.51	1.34262	0.185844	1
hyodeoxycholic_acid_ba	acetobacter	intest_surgery1	-0.17179	0.387255	-0.443609	0.659361	1
isodeoxycholic_acid_ba	acetobacter	(Intercept)	-2.96577	0.900527	-3.29337	0.00188562	1
isodeoxycholic_acid_ba	acetobacter	acetobacter	6903.66	18559.8	0.371969	0.711588	1
isodeoxycholic_acid_ba	acetobacter	intest_surgery1	1.59357	0.945519	1.68539	0.0985428	1
murocholic_acid_muro_ca_ba	acetobacter	(Intercept)	1.4117	0.768904	1.83599	0.0726888	1
murocholic_acid_muro_ca_ba	acetobacter	acetobacter	-2342.57	15847	-0.147824	0.883114	1
murocholic_acid_muro_ca_ba	acetobacter	intest_surgery1	2.03809	0.80732	2.52452	0.015021	1
ursodeoxycholic_acid_udca_ba	acetobacter	(Intercept)	3.19728	0.400977	7.97373	2.78804876505615e-10	1
ursodeoxycholic_acid_udca_ba	acetobacter	acetobacter	-12585.1	8264.1	-1.52287	0.134493	1
ursodeoxycholic_acid_udca_ba	acetobacter	intest_surgery1	1.47913	0.42101	3.51329	0.000989986	1
x3a_hydroxy_7_12_diketo_cholanic_acid_ba	acetobacter	(Intercept)	-2.00149	0.655891	-3.05156	0.00373732	1
x3a_hydroxy_7_12_diketo_cholanic_acid_ba	acetobacter	acetobacter	-12040.8	13517.8	-0.890732	0.37761	1
x3a_hydroxy_7_12_diketo_cholanic_acid_ba	acetobacter	intest_surgery1	2.1226	0.68866	3.08221	0.00343203	1
x5b_cholanic_acid_3a_6a_diol_7_one_ba	acetobacter	(Intercept)	-2.88832	0.633449	-4.55967	3.66313424444736e-05	1
x5b_cholanic_acid_3a_6a_diol_7_one_ba	acetobacter	acetobacter	24399.1	13055.3	1.8689	0.0678757	1
x5b_cholanic_acid_3a_6a_diol_7_one_ba	acetobacter	intest_surgery1	-0.856913	0.665097	-1.2884	0.203912	1
x3_dehydrocholic_acid_ba	acetobacter	(Intercept)	0.861456	0.733142	1.17502	0.245905	1
x3_dehydrocholic_acid_ba	acetobacter	acetobacter	-35326.9	15110	-2.33798	0.0236956	1
x3_dehydrocholic_acid_ba	acetobacter	intest_surgery1	3.40291	0.769771	4.42068	5.77931248912737e-05	1
cholic_acid_ca_ba	acetobacter	(Intercept)	3.75668	0.652854	5.75423	6.32615921261277e-07	1
cholic_acid_ca_ba	acetobacter	acetobacter	-23656.3	13455.3	-1.75814	0.0852341	1
cholic_acid_ca_ba	acetobacter	intest_surgery1	3.12069	0.685472	4.55262	3.74928119962089e-05	1
hyocholic_acid_hca_ba	acetobacter	(Intercept)	0.841512	0.303701	2.77086	0.00798348	1
hyocholic_acid_hca_ba	acetobacter	acetobacter	1290.1	6259.24	0.206111	0.837594	1
hyocholic_acid_hca_ba	acetobacter	intest_surgery1	-0.307118	0.318874	-0.963132	0.340411	1
glycoursocholanic_acid_ba	acetobacter	(Intercept)	-3.94595	0.702416	-5.61769	1.01515861985989e-06	1
glycoursocholanic_acid_ba	acetobacter	acetobacter	7756.39	14476.7	0.535783	0.594635	1
glycoursocholanic_acid_ba	acetobacter	intest_surgery1	-1.51182	0.73751	-2.04989	0.045977	1
glycolithocholic_acid_glca_ba	acetobacter	(Intercept)	-2.51092	0.379382	-6.61845	3.10220578530232e-08	1
glycolithocholic_acid_glca_ba	acetobacter	acetobacter	11376.5	7819.03	1.45498	0.152322	1
glycolithocholic_acid_glca_ba	acetobacter	intest_surgery1	-0.233765	0.398337	-0.586854	0.56011	1
glycoursodeoxycholic_acid_gudca_ba	acetobacter	(Intercept)	-4.11387	0.903016	-4.5557	3.71141892881187e-05	1
glycoursodeoxycholic_acid_gudca_ba	acetobacter	acetobacter	-16832.4	18611.1	-0.904427	0.370382	1
glycoursodeoxycholic_acid_gudca_ba	acetobacter	intest_surgery1	2.2955	0.948132	2.42108	0.0193895	1
glycochenodeoxycholic_acid_gcdca_ba	acetobacter	(Intercept)	1.55143	0.388965	3.98861	0.00023093	1
glycochenodeoxycholic_acid_gcdca_ba	acetobacter	acetobacter	-9105.42	8016.52	-1.13583	0.261786	1
glycochenodeoxycholic_acid_gcdca_ba	acetobacter	intest_surgery1	1.04533	0.408398	2.55958	0.0137568	1
glycodeoxycholic_acid_gdca_ba	acetobacter	(Intercept)	-1.01711	0.669467	-1.51929	0.135389	1
glycodeoxycholic_acid_gdca_ba	acetobacter	acetobacter	37083.1	13797.7	2.68763	0.00992069	1
glycodeoxycholic_acid_gdca_ba	acetobacter	intest_surgery1	-1.38657	0.702915	-1.9726	0.0544404	1
glycocholic_acid_gca_ba	acetobacter	(Intercept)	0.926319	0.390242	2.37371	0.021749	1
glycocholic_acid_gca_ba	acetobacter	acetobacter	-10187	8042.85	-1.26659	0.211543	1
glycocholic_acid_gca_ba	acetobacter	intest_surgery1	0.916418	0.409739	2.23659	0.0300968	1
taurolithocholic_acid_tlca_ba	acetobacter	(Intercept)	-3.11737	0.660561	-4.71927	2.15855165923264e-05	1
taurolithocholic_acid_tlca_ba	acetobacter	acetobacter	17685.3	13614.1	1.29904	0.200267	1
taurolithocholic_acid_tlca_ba	acetobacter	intest_surgery1	-0.993981	0.693564	-1.43315	0.158434	1
taurochenodeoxycholic_acid_tcdca_ba	acetobacter	(Intercept)	0.511428	0.5446	0.93909	0.352486	1
taurochenodeoxycholic_acid_tcdca_ba	acetobacter	acetobacter	-14327.9	11224.2	-1.27652	0.208043	1
taurochenodeoxycholic_acid_tcdca_ba	acetobacter	intest_surgery1	0.866092	0.571809	1.51465	0.136557	1
taurodeoxycholic_acid_tdca_ba	acetobacter	(Intercept)	-1.05942	0.617554	-1.71552	0.0928369	1
taurodeoxycholic_acid_tdca_ba	acetobacter	acetobacter	17500.2	12727.7	1.37497	0.175661	1
taurodeoxycholic_acid_tdca_ba	acetobacter	intest_surgery1	-1.86804	0.648408	-2.88096	0.00595609	1
tauro_w_muricholic_acid_tw_mca_ba	acetobacter	(Intercept)	-2.59325	0.931976	-2.78253	0.00774171	1
tauro_w_muricholic_acid_tw_mca_ba	acetobacter	acetobacter	-36650.4	19207.9	-1.90809	0.0624989	1
tauro_w_muricholic_acid_tw_mca_ba	acetobacter	intest_surgery1	1.22773	0.978539	1.25466	0.215805	1
taurocholic_acid_tca_ba	acetobacter	(Intercept)	1.40626	0.451999	3.1112	0.00316497	1
taurocholic_acid_tca_ba	acetobacter	acetobacter	-17846.6	9315.67	-1.91576	0.0614899	1
taurocholic_acid_tca_ba	acetobacter	intest_surgery1	0.799198	0.474582	1.684	0.098812	1
x2_hydroxybutyrate_p	acetobacterium	(Intercept)	-3.37839	0.158449	-21.3216	8.31153421034374e-26	1
x2_hydroxybutyrate_p	acetobacterium	acetobacterium	-3044.58	4943.46	-0.615881	0.540945	1
x2_hydroxybutyrate_p	acetobacterium	intest_surgery1	-0.285309	0.159679	-1.78676	0.0804268	1
x3_hydroxybutyrate_p	acetobacterium	(Intercept)	-3.13372	0.273316	-11.4655	3.23605346374072e-15	1
x3_hydroxybutyrate_p	acetobacterium	acetobacterium	1748.5	8527.23	0.205049	0.838419	1
x3_hydroxybutyrate_p	acetobacterium	intest_surgery1	-0.237772	0.275439	-0.863247	0.392385	1
x3_hydroxyisovalerate_p	acetobacterium	(Intercept)	-4.67194	0.0263916	-177.024	4.84596099616028e-68	1
x3_hydroxyisovalerate_p	acetobacterium	acetobacterium	1206.56	823.394	1.46535	0.149483	1
x3_hydroxyisovalerate_p	acetobacterium	intest_surgery1	-0.0198897	0.0265966	-0.747828	0.45829	1
acetate_p	acetobacterium	(Intercept)	-2.78276	0.067366	-41.308	1.35709308703779e-38	1
acetate_p	acetobacterium	acetobacterium	1831.03	2101.76	0.87119	0.388079	1
acetate_p	acetobacterium	intest_surgery1	-0.061471	0.0678892	-0.90546	0.36984	1
acetoacetate_p	acetobacterium	(Intercept)	-3.65675	0.157316	-23.2446	2.02694095672704e-27	1
acetoacetate_p	acetobacterium	acetobacterium	-793.229	4908.12	-0.161616	0.872301	1
acetoacetate_p	acetobacterium	intest_surgery1	-0.144094	0.158538	-0.908892	0.368044	1
alanine_p	acetobacterium	(Intercept)	-1.40496	0.0685431	-20.4975	4.44385266320209e-25	1
alanine_p	acetobacterium	acetobacterium	-1647.82	2138.48	-0.770557	0.444826	1
alanine_p	acetobacterium	intest_surgery1	0.0528336	0.0690755	0.764868	0.448173	1
citrate_p	acetobacterium	(Intercept)	-2.39007	0.0816431	-29.2746	7.9247210015814e-32	1
citrate_p	acetobacterium	acetobacterium	687.602	2547.19	0.269945	0.788384	1
citrate_p	acetobacterium	intest_surgery1	-0.105529	0.0822773	-1.2826	0.205922	1
creatinine_p	acetobacterium	(Intercept)	-3.66073	0.0907224	-40.3509	3.96508763737541e-38	1
creatinine_p	acetobacterium	acetobacterium	1322.81	2830.46	0.467347	0.642411	1
creatinine_p	acetobacterium	intest_surgery1	-0.152668	0.091427	-1.66983	0.1016	1
formate_p	acetobacterium	(Intercept)	-2.88872	0.0844684	-34.1989	7.33549646988486e-35	1
formate_p	acetobacterium	acetobacterium	779.044	2635.34	0.295614	0.768827	1
formate_p	acetobacterium	intest_surgery1	0.139653	0.0851245	1.64057	0.107563	1
glucose_p	acetobacterium	(Intercept)	1.15418	0.0307016	37.5935	1.001175318021e-36	1
glucose_p	acetobacterium	acetobacterium	-205.871	957.863	-0.214928	0.830754	1
glucose_p	acetobacterium	intest_surgery1	-0.0556536	0.0309401	-1.79875	0.078481	1
glutamine_p	acetobacterium	(Intercept)	-1.0568	0.0441358	-23.9443	5.59244643850957e-28	1
glutamine_p	acetobacterium	acetobacterium	-399.27	1377	-0.289956	0.773125	1
glutamine_p	acetobacterium	intest_surgery1	0.0422081	0.0444787	0.948951	0.3475	1
glycine_p	acetobacterium	(Intercept)	-1.66323	0.0732624	-22.7023	5.6239900523339e-27	1
glycine_p	acetobacterium	acetobacterium	-3961.54	2285.72	-1.73317	0.0896231	1
glycine_p	acetobacterium	intest_surgery1	0.0985421	0.0738315	1.33469	0.188408	1
histidine_p	acetobacterium	(Intercept)	-2.88521	0.0604571	-47.7232	1.79206440914474e-41	1
histidine_p	acetobacterium	acetobacterium	60.995	1886.21	0.0323374	0.97434	1
histidine_p	acetobacterium	intest_surgery1	-0.0121888	0.0609267	-0.200057	0.842299	1
isoleucine_p	acetobacterium	(Intercept)	-3.12128	0.108704	-28.7136	1.876948887289e-31	1
isoleucine_p	acetobacterium	acetobacterium	923.192	3391.46	0.272211	0.786652	1
isoleucine_p	acetobacterium	intest_surgery1	-0.136992	0.109548	-1.25052	0.217301	1
isopropanol_p	acetobacterium	(Intercept)	-4.64684	0.369555	-12.5741	1.20272795570003e-16	1
isopropanol_p	acetobacterium	acetobacterium	-18605.5	11529.8	-1.61369	0.11329	1
isopropanol_p	acetobacterium	intest_surgery1	-0.0957251	0.372426	-0.257031	0.798277	1
lactate_p	acetobacterium	(Intercept)	-0.129855	0.107949	-1.20293	0.235028	1
lactate_p	acetobacterium	acetobacterium	-6950.97	3367.92	-2.06388	0.0445745	1
lactate_p	acetobacterium	intest_surgery1	0.114364	0.108788	1.05126	0.298516	1
leucine_p	acetobacterium	(Intercept)	-2.66255	0.0956263	-27.8432	7.37201069143754e-31	1
leucine_p	acetobacterium	acetobacterium	2262.56	2983.45	0.758368	0.452017	1
leucine_p	acetobacterium	intest_surgery1	-0.115773	0.096369	-1.20135	0.235636	1
lysine_p	acetobacterium	(Intercept)	-2.23283	0.0777104	-28.7327	1.82216968438514e-31	1
lysine_p	acetobacterium	acetobacterium	-2113.93	2424.5	-0.871907	0.387691	1
lysine_p	acetobacterium	intest_surgery1	-0.076726	0.078314	-0.979723	0.332239	1
phenylalanine_p	acetobacterium	(Intercept)	-3.27149	0.0650363	-50.3025	1.5818120757801e-42	1
phenylalanine_p	acetobacterium	acetobacterium	1837.85	2029.07	0.905758	0.369684	1
phenylalanine_p	acetobacterium	intest_surgery1	-0.0553225	0.0655414	-0.844085	0.402898	1
pyruvate_p	acetobacterium	(Intercept)	-3.12313	0.119752	-26.0799	1.32872155563981e-29	1
pyruvate_p	acetobacterium	acetobacterium	-7390.8	3736.16	-1.97818	0.0537872	1
pyruvate_p	acetobacterium	intest_surgery1	-0.0151254	0.120682	-0.125332	0.900795	1
tryptophan_p	acetobacterium	(Intercept)	-3.36458	0.0827703	-40.6496	2.8301893427073e-38	1
tryptophan_p	acetobacterium	acetobacterium	1601.69	2582.36	0.620242	0.538094	1
tryptophan_p	acetobacterium	intest_surgery1	-0.105689	0.0834132	-1.26705	0.211379	1
tyrosine_p	acetobacterium	(Intercept)	-3.07608	0.10237	-30.0488	2.47001225044375e-32	1
tyrosine_p	acetobacterium	acetobacterium	2556.26	3193.84	0.800373	0.427522	1
tyrosine_p	acetobacterium	intest_surgery1	-0.104529	0.103165	-1.01323	0.31614	1
valine_p	acetobacterium	(Intercept)	-1.81484	0.0887183	-20.4562	4.83994823735153e-25	1
valine_p	acetobacterium	acetobacterium	2177.64	2767.93	0.786739	0.435384	1
valine_p	acetobacterium	intest_surgery1	-0.116881	0.0894073	-1.30729	0.197474	1
acetate_s	acetobacterium	(Intercept)	4.02342	0.127018	31.676	2.32221527596285e-33	1
acetate_s	acetobacterium	acetobacterium	6077.94	3962.85	1.53373	0.131801	1
acetate_s	acetobacterium	intest_surgery1	0.178805	0.128005	1.39686	0.169016	1
alanine_s	acetobacterium	(Intercept)	1.18108	0.159971	7.38307	2.15093642668086e-09	1
alanine_s	acetobacterium	acetobacterium	-4587.23	4990.95	-0.91911	0.362731	1
alanine_s	acetobacterium	intest_surgery1	0.317985	0.161213	1.97245	0.0544582	1
aspartate_s	acetobacterium	(Intercept)	0.582399	0.134008	4.34599	7.36961419861586e-05	1
aspartate_s	acetobacterium	acetobacterium	-78.6581	4180.94	-0.0188135	0.98507	1
aspartate_s	acetobacterium	intest_surgery1	-0.227394	0.135049	-1.68379	0.0988541	1
butyrate_s	acetobacterium	(Intercept)	2.01987	0.183289	11.0201	1.27025670902662e-14	1
butyrate_s	acetobacterium	acetobacterium	21130.4	5718.45	3.69512	0.00057272	1
butyrate_s	acetobacterium	intest_surgery1	-0.240781	0.184713	-1.30354	0.198738	1
formate_s	acetobacterium	(Intercept)	-1.30227	0.135006	-9.64602	1.01146248468666e-12	1
formate_s	acetobacterium	acetobacterium	-1436.54	4212.06	-0.341054	0.734583	1
formate_s	acetobacterium	intest_surgery1	-0.101037	0.136054	-0.742621	0.461407	1
glucose_s	acetobacterium	(Intercept)	0.890326	0.250578	3.55308	0.000879178	1
glucose_s	acetobacterium	acetobacterium	8676.89	7817.82	1.10989	0.272694	1
glucose_s	acetobacterium	intest_surgery1	0.599142	0.252524	2.37261	0.0218066	1
glutamate_s	acetobacterium	(Intercept)	1.4743	0.230959	6.38338	7.05863993817545e-08	1
glutamate_s	acetobacterium	acetobacterium	-6747.7	7205.71	-0.936437	0.353835	1
glutamate_s	acetobacterium	intest_surgery1	0.0538966	0.232753	0.231562	0.817884	1
glutamine_s	acetobacterium	(Intercept)	0.413894	0.129745	3.19004	0.00253409	1
glutamine_s	acetobacterium	acetobacterium	632.272	4047.94	0.156196	0.876548	1
glutamine_s	acetobacterium	intest_surgery1	-0.190814	0.130753	-1.45934	0.151122	1
histidine_s	acetobacterium	(Intercept)	-0.611963	0.188386	-3.24845	0.00214539	1
histidine_s	acetobacterium	acetobacterium	-3653.69	5877.47	-0.621644	0.53718	1
histidine_s	acetobacterium	intest_surgery1	0.0350598	0.189849	0.184672	0.854281	1
isoleucine_s	acetobacterium	(Intercept)	0.73632	0.133329	5.52257	1.40992525882672e-06	1
isoleucine_s	acetobacterium	acetobacterium	-2573.98	4159.75	-0.618782	0.539047	1
isoleucine_s	acetobacterium	intest_surgery1	0.0154259	0.134365	0.114806	0.909088	1
lactate_s	acetobacterium	(Intercept)	0.724304	0.208618	3.47191	0.00111927	1
lactate_s	acetobacterium	acetobacterium	1066.44	6508.71	0.163849	0.870553	1
lactate_s	acetobacterium	intest_surgery1	0.175686	0.210239	0.835651	0.40758	1
leucine_s	acetobacterium	(Intercept)	0.999396	0.139371	7.17077	4.50431847722036e-09	1
leucine_s	acetobacterium	acetobacterium	-1517.47	4348.24	-0.348985	0.728659	1
leucine_s	acetobacterium	intest_surgery1	0.119453	0.140453	0.850484	0.399368	1
methylamine_s	acetobacterium	(Intercept)	-2.21075	0.333585	-6.62723	3.00832069067671e-08	1
methylamine_s	acetobacterium	acetobacterium	24113.7	10407.6	2.31694	0.0249139	1
methylamine_s	acetobacterium	intest_surgery1	-0.613722	0.336176	-1.8256	0.0742687	1
phenylalanine_s	acetobacterium	(Intercept)	0.498544	0.133979	3.72105	0.0005292	1
phenylalanine_s	acetobacterium	acetobacterium	-3451.75	4180.04	-0.825769	0.413107	1
phenylalanine_s	acetobacterium	intest_surgery1	0.189946	0.13502	1.4068	0.166066	1
propionate_s	acetobacterium	(Intercept)	3.00691	0.23948	12.556	1.26771665352296e-16	1
propionate_s	acetobacterium	acetobacterium	-4355.79	7471.57	-0.582982	0.562692	1
propionate_s	acetobacterium	intest_surgery1	-0.0929203	0.24134	-0.385018	0.701961	1
succinate_s	acetobacterium	(Intercept)	0.285228	0.578464	0.493078	0.624254	1
succinate_s	acetobacterium	acetobacterium	-43927.7	18047.6	-2.434	0.0187875	1
succinate_s	acetobacterium	intest_surgery1	1.4001	0.582957	2.40171	0.0203247	1
trimethylamine_s	acetobacterium	(Intercept)	-1.77299	0.250074	-7.08984	5.97337033953865e-09	1
trimethylamine_s	acetobacterium	acetobacterium	988.074	7802.1	0.126642	0.899764	1
trimethylamine_s	acetobacterium	intest_surgery1	0.237784	0.252017	0.943524	0.350238	1
tyrosine_s	acetobacterium	(Intercept)	0.586768	0.136856	4.28748	8.90656761683671e-05	1
tyrosine_s	acetobacterium	acetobacterium	-3952.45	4269.79	-0.925677	0.359343	1
tyrosine_s	acetobacterium	intest_surgery1	0.0813248	0.137919	0.589656	0.558245	1
valine_s	acetobacterium	(Intercept)	1.18419	0.149201	7.93689	3.16473840348107e-10	1
valine_s	acetobacterium	acetobacterium	-3573.42	4654.94	-0.767661	0.446528	1
valine_s	acetobacterium	intest_surgery1	0.1236	0.15036	0.822024	0.415214	1
lithocholenic_acid_ba	acetobacterium	(Intercept)	3.04616	0.674542	4.5159	4.23086337077038e-05	1
lithocholenic_acid_ba	acetobacterium	acetobacterium	24970.9	21045.1	1.18654	0.241372	1
lithocholenic_acid_ba	acetobacterium	intest_surgery1	-2.18621	0.679781	-3.21604	0.0023535	1
isolithocholic_acid_ba	acetobacterium	(Intercept)	5.17967	0.59984	8.63508	2.92162712375087e-11	1
isolithocholic_acid_ba	acetobacterium	acetobacterium	37293.2	18714.5	1.99274	0.0521142	1
isolithocholic_acid_ba	acetobacterium	intest_surgery1	-1.97238	0.604499	-3.26283	0.00205878	1
allolithocholic_acid_ba	acetobacterium	(Intercept)	1.60751	0.473258	3.39669	0.00139662	1
allolithocholic_acid_ba	acetobacterium	acetobacterium	15283.5	14765.2	1.0351	0.305917	1
allolithocholic_acid_ba	acetobacterium	intest_surgery1	-1.96862	0.476934	-4.12765	0.000148727	1
x3a_12a_23_nordeoxycholic_acid_ba	acetobacterium	(Intercept)	-4.5653	0.714989	-6.38514	7.01539549162531e-08	1
x3a_12a_23_nordeoxycholic_acid_ba	acetobacterium	acetobacterium	38659.8	22307	1.73308	0.0896394	1
x3a_12a_23_nordeoxycholic_acid_ba	acetobacterium	intest_surgery1	-0.41963	0.720542	-0.582382	0.563093	1
x3_6_diketocholanic_acid_ba	acetobacterium	(Intercept)	3.1534	0.519137	6.07432	2.07737467696856e-07	1
x3_6_diketocholanic_acid_ba	acetobacterium	acetobacterium	1507.69	16196.6	0.0930868	0.92623	1
x3_6_diketocholanic_acid_ba	acetobacterium	intest_surgery1	-0.965402	0.523169	-1.8453	0.0712995	1
x8_14_5b_cholenic_acid_3a_12a_diol_ba	acetobacterium	(Intercept)	3.8778	0.675672	5.73918	6.66532347776974e-07	1
x8_14_5b_cholenic_acid_3a_12a_diol_ba	acetobacterium	acetobacterium	40595.1	21080.4	1.92573	0.0601998	1
x8_14_5b_cholenic_acid_3a_12a_diol_ba	acetobacterium	intest_surgery1	-2.17577	0.68092	-3.19534	0.00249628	1
x5b_cholenic_acid_7a_ol_3_one_ba	acetobacterium	(Intercept)	3.79235	0.246422	15.3896	5.59984319661728e-20	1
x5b_cholenic_acid_7a_ol_3_one_ba	acetobacterium	acetobacterium	-932.909	7688.14	-0.121344	0.903936	1
x5b_cholenic_acid_7a_ol_3_one_ba	acetobacterium	intest_surgery1	-0.0859684	0.248336	-0.346178	0.730754	1
x5a_cholanic_acid_3a_ol_6_one_ba	acetobacterium	(Intercept)	1.61117	1.23153	1.30826	0.197147	1
x5a_cholanic_acid_3a_ol_6_one_ba	acetobacterium	acetobacterium	53943.9	38422.7	1.40396	0.166905	1
x5a_cholanic_acid_3a_ol_6_one_ba	acetobacterium	intest_surgery1	-2.02067	1.2411	-1.62813	0.110183	1
x3a_hydroxy_12_ketolithocholic_acid_ba	acetobacterium	(Intercept)	2.29664	0.878593	2.614	0.0119856	1
x3a_hydroxy_12_ketolithocholic_acid_ba	acetobacterium	acetobacterium	-56165.6	27411.3	-2.04899	0.0460685	1
x3a_hydroxy_12_ketolithocholic_acid_ba	acetobacterium	intest_surgery1	3.21648	0.885417	3.63273	0.000692004	1
lithocholic_acid_ba	acetobacterium	(Intercept)	5.20535	0.600665	8.66599	2.63185540305082e-11	1
lithocholic_acid_ba	acetobacterium	acetobacterium	37355.2	18740.2	1.99332	0.052049	1
lithocholic_acid_ba	acetobacterium	intest_surgery1	-1.97572	0.60533	-3.26388	0.00205257	1
x5b_cholanic_acid_3b_12a_diol_ba	acetobacterium	(Intercept)	2.78255	0.399893	6.95823	9.45734112590924e-09	1
x5b_cholanic_acid_3b_12a_diol_ba	acetobacterium	acetobacterium	-20579.5	12476.3	-1.64949	0.105716	1
x5b_cholanic_acid_3b_12a_diol_ba	acetobacterium	intest_surgery1	0.334153	0.402999	0.829166	0.411202	1
chenodeoxycholic_acid_cdca_ba	acetobacterium	(Intercept)	1.95718	1.2892	1.51813	0.135679	1
chenodeoxycholic_acid_cdca_ba	acetobacterium	acetobacterium	-49078.7	40222	-1.2202	0.228477	1
chenodeoxycholic_acid_cdca_ba	acetobacterium	intest_surgery1	5.46133	1.29922	4.20356	0.000116687	1
deoxycholic_acid_dca_ba	acetobacterium	(Intercept)	3.9348	1.39165	2.82744	0.00687309	1
deoxycholic_acid_dca_ba	acetobacterium	acetobacterium	92567.4	43418.3	2.13199	0.0382638	1
deoxycholic_acid_dca_ba	acetobacterium	intest_surgery1	-4.47926	1.40246	-3.19386	0.0025068	1
hyodeoxycholic_acid_ba	acetobacterium	(Intercept)	4.05963	0.396332	10.243	1.4672243589466e-13	1
hyodeoxycholic_acid_ba	acetobacterium	acetobacterium	4482.23	12365.2	0.362488	0.718613	1
hyodeoxycholic_acid_ba	acetobacterium	intest_surgery1	-0.176476	0.39941	-0.441841	0.660631	1
isodeoxycholic_acid_ba	acetobacterium	(Intercept)	-2.43537	0.95071	-2.56164	0.0136857	1
isodeoxycholic_acid_ba	acetobacterium	acetobacterium	-12007.2	29661.3	-0.404812	0.687452	1
isodeoxycholic_acid_ba	acetobacterium	intest_surgery1	1.50658	0.958094	1.57247	0.12255	1
murocholic_acid_muro_ca_ba	acetobacterium	(Intercept)	2.21187	0.793974	2.78583	0.00767461	1
murocholic_acid_muro_ca_ba	acetobacterium	acetobacterium	-36556.3	24771.3	-1.47576	0.146678	1
murocholic_acid_muro_ca_ba	acetobacterium	intest_surgery1	1.84115	0.80014	2.30104	0.0258714	1
ursodeoxycholic_acid_udca_ba	acetobacterium	(Intercept)	3.47341	0.411027	8.45057	5.46031548902359e-11	1
ursodeoxycholic_acid_udca_ba	acetobacterium	acetobacterium	-29639.1	12823.7	-2.31128	0.0252511	1
ursodeoxycholic_acid_udca_ba	acetobacterium	intest_surgery1	1.35052	0.414219	3.26039	0.00207323	1
x3a_hydroxy_7_12_diketo_cholanic_acid_ba	acetobacterium	(Intercept)	-1.43592	0.67183	-2.13733	0.0378039	1
x3a_hydroxy_7_12_diketo_cholanic_acid_ba	acetobacterium	acetobacterium	-40850.3	20960.5	-1.94892	0.0572881	1
x3a_hydroxy_7_12_diketo_cholanic_acid_ba	acetobacterium	intest_surgery1	1.92992	0.677049	2.85048	0.00646321	1
x5b_cholanic_acid_3a_6a_diol_7_one_ba	acetobacterium	(Intercept)	-2.59175	0.684968	-3.78375	0.000436688	1
x5b_cholanic_acid_3a_6a_diol_7_one_ba	acetobacterium	acetobacterium	22975.8	21370.4	1.07512	0.287807	1
x5b_cholanic_acid_3a_6a_diol_7_one_ba	acetobacterium	intest_surgery1	-0.799782	0.690288	-1.15862	0.252464	1
x3_dehydrocholic_acid_ba	acetobacterium	(Intercept)	1.16413	0.762006	1.52772	0.133286	1
x3_dehydrocholic_acid_ba	acetobacterium	acetobacterium	-63613.2	23773.9	-2.67576	0.0102299	1
x3_dehydrocholic_acid_ba	acetobacterium	intest_surgery1	3.15105	0.767924	4.10333	0.000160692	1
cholic_acid_ca_ba	acetobacterium	(Intercept)	3.89526	0.686798	5.67163	8.42313054177846e-07	1
cholic_acid_ca_ba	acetobacterium	acetobacterium	-39941	21427.5	-1.86401	0.0685736	1
cholic_acid_ca_ba	acetobacterium	intest_surgery1	2.96685	0.692132	4.28653	8.93399987805192e-05	1
hyocholic_acid_hca_ba	acetobacterium	(Intercept)	0.717981	0.31919	2.24939	0.029212	1
hyocholic_acid_hca_ba	acetobacterium	acetobacterium	6985.71	9958.43	0.701486	0.486459	1
hyocholic_acid_hca_ba	acetobacterium	intest_surgery1	-0.271933	0.321669	-0.84538	0.402182	1
glycoursocholanic_acid_ba	acetobacterium	(Intercept)	-4.99958	0.698364	-7.15898	4.69333932955344e-09	1
glycoursocholanic_acid_ba	acetobacterium	acetobacterium	54888.9	21788.3	2.51919	0.0152223	1
glycoursocholanic_acid_ba	acetobacterium	intest_surgery1	-1.22844	0.703788	-1.74546	0.0874394	1
glycolithocholic_acid_glca_ba	acetobacterium	(Intercept)	-2.23009	0.408939	-5.45337	1.78960054507616e-06	1
glycolithocholic_acid_glca_ba	acetobacterium	acetobacterium	4803.87	12758.5	0.376522	0.708223	1
glycolithocholic_acid_glca_ba	acetobacterium	intest_surgery1	-0.240061	0.412115	-0.582511	0.563007	1
glycoursodeoxycholic_acid_gudca_ba	acetobacterium	(Intercept)	-3.40721	0.928608	-3.66916	0.000619736	1
glycoursodeoxycholic_acid_gudca_ba	acetobacterium	acetobacterium	-53625.3	28971.7	-1.85095	0.0704664	1
glycoursodeoxycholic_acid_gudca_ba	acetobacterium	intest_surgery1	2.04555	0.93582	2.18584	0.033844	1
glycochenodeoxycholic_acid_gcdca_ba	acetobacterium	(Intercept)	1.64016	0.408838	4.01175	0.000214711	1
glycochenodeoxycholic_acid_gcdca_ba	acetobacterium	acetobacterium	-16840.4	12755.4	-1.32026	0.193144	1
glycochenodeoxycholic_acid_gcdca_ba	acetobacterium	intest_surgery1	0.977934	0.412014	2.37355	0.0217574	1
glycodeoxycholic_acid_gdca_ba	acetobacterium	(Intercept)	-1.01232	0.717126	-1.41163	0.164644	1
glycodeoxycholic_acid_gdca_ba	acetobacterium	acetobacterium	53406.1	22373.7	2.38701	0.0210618	1
glycodeoxycholic_acid_gdca_ba	acetobacterium	intest_surgery1	-1.1967	0.722695	-1.65589	0.104407	1
glycocholic_acid_gca_ba	acetobacterium	(Intercept)	0.87647	0.414873	2.11262	0.0399735	1
glycocholic_acid_gca_ba	acetobacterium	acetobacterium	-12659.2	12943.7	-0.978024	0.33307	1
glycocholic_acid_gca_ba	acetobacterium	intest_surgery1	0.875474	0.418096	2.09395	0.041684	1
taurolithocholic_acid_tlca_ba	acetobacterium	(Intercept)	-3.01358	0.702979	-4.28687	8.92427168062304e-05	1
taurolithocholic_acid_tlca_ba	acetobacterium	acetobacterium	21262.2	21932.3	0.969447	0.337285	1
taurolithocholic_acid_tlca_ba	acetobacterium	intest_surgery1	-0.926884	0.708439	-1.30835	0.197118	1
taurochenodeoxycholic_acid_tcdca_ba	acetobacterium	(Intercept)	0.501995	0.577223	0.869674	0.388899	1
taurochenodeoxycholic_acid_tcdca_ba	acetobacterium	acetobacterium	-20320.4	18008.8	-1.12836	0.264895	1
taurochenodeoxycholic_acid_tcdca_ba	acetobacterium	intest_surgery1	0.794484	0.581706	1.36578	0.178507	1
taurodeoxycholic_acid_tdca_ba	acetobacterium	(Intercept)	-1.02166	0.655812	-1.55785	0.125976	1
taurodeoxycholic_acid_tdca_ba	acetobacterium	acetobacterium	23731.7	20460.7	1.15987	0.251962	1
taurodeoxycholic_acid_tdca_ba	acetobacterium	intest_surgery1	-1.78664	0.660905	-2.70332	0.00952541	1
tauro_w_muricholic_acid_tw_mca_ba	acetobacterium	(Intercept)	-2.05193	0.958804	-2.14009	0.0375681	1
tauro_w_muricholic_acid_tw_mca_ba	acetobacterium	acetobacterium	-75419.4	29913.8	-2.52122	0.0151451	1
tauro_w_muricholic_acid_tw_mca_ba	acetobacterium	intest_surgery1	0.913919	0.966251	0.94584	0.349068	1
taurocholic_acid_tca_ba	acetobacterium	(Intercept)	1.43417	0.479312	2.99215	0.00440302	1
taurocholic_acid_tca_ba	acetobacterium	acetobacterium	-26955.1	14954.1	-1.80252	0.0778784	1
taurocholic_acid_tca_ba	acetobacterium	intest_surgery1	0.700841	0.483035	1.45091	0.153447	1
x2_hydroxybutyrate_p	acetohalobium	(Intercept)	-3.51407	0.117183	-29.988	2.70420606825751e-32	1
x2_hydroxybutyrate_p	acetohalobium	acetohalobium	11833.9	10496.6	1.1274	0.265297	1
x2_hydroxybutyrate_p	acetohalobium	intest_surgery1	-0.273223	0.155885	-1.75272	0.0861714	1
x3_hydroxybutyrate_p	acetohalobium	(Intercept)	-3.11298	0.204011	-15.2588	7.83318203967862e-20	1
x3_hydroxybutyrate_p	acetohalobium	acetohalobium	4075.73	18274.2	0.223032	0.824477	1
x3_hydroxybutyrate_p	acetohalobium	intest_surgery1	-0.2492	0.271391	-0.918232	0.363186	1
x3_hydroxyisovalerate_p	acetohalobium	(Intercept)	-4.65779	0.0196068	-237.56	4.87786253658541e-74	1
x3_hydroxyisovalerate_p	acetohalobium	acetohalobium	2843.21	1756.27	1.61889	0.112163	1
x3_hydroxyisovalerate_p	acetohalobium	intest_surgery1	-0.0277877	0.0260824	-1.06538	0.292145	1
acetate_p	acetohalobium	(Intercept)	-2.75656	0.0503862	-54.7086	3.26209694224641e-44	1
acetate_p	acetohalobium	acetohalobium	3416.8	4513.32	0.757048	0.4528	1
acetate_p	acetohalobium	intest_surgery1	-0.0730863	0.0670273	-1.0904	0.281098	1
acetoacetate_p	acetohalobium	(Intercept)	-3.70203	0.117188	-31.5904	2.62232673761823e-33	1
acetoacetate_p	acetohalobium	acetohalobium	4970.72	10497.1	0.473533	0.638025	1
acetoacetate_p	acetohalobium	intest_surgery1	-0.141724	0.155892	-0.909114	0.367928	1
alanine_p	acetohalobium	(Intercept)	-1.43391	0.0513803	-27.9079	6.65113743138019e-31	1
alanine_p	acetohalobium	acetohalobium	-2052.79	4602.37	-0.446029	0.657625	1
alanine_p	acetohalobium	intest_surgery1	0.062865	0.0683497	0.919754	0.362398	1
citrate_p	acetohalobium	(Intercept)	-2.37005	0.0609838	-38.8637	2.20268991058822e-37	1
citrate_p	acetohalobium	acetohalobium	-652.675	5462.59	-0.119481	0.905404	1
citrate_p	acetohalobium	intest_surgery1	-0.109092	0.081125	-1.34474	0.185164	1
creatinine_p	acetohalobium	(Intercept)	-3.66185	0.0671062	-54.5679	3.67491980775975e-44	1
creatinine_p	acetohalobium	acetohalobium	6278.43	6011.01	1.04449	0.301602	1
creatinine_p	acetohalobium	intest_surgery1	-0.162631	0.0892694	-1.8218	0.0748518	1
formate_p	acetohalobium	(Intercept)	-2.84917	0.0627854	-45.3795	1.8190301353314e-40	1
formate_p	acetohalobium	acetohalobium	-3946.22	5623.98	-0.701678	0.48634	1
formate_p	acetohalobium	intest_surgery1	0.136939	0.0835217	1.63956	0.107773	1
glucose_p	acetohalobium	(Intercept)	1.14589	0.0229066	50.0244	2.04313683440418e-42	1
glucose_p	acetohalobium	acetohalobium	632.655	2051.85	0.308334	0.75919	1
glucose_p	acetohalobium	intest_surgery1	-0.0547672	0.030472	-1.7973	0.0787149	1
glutamine_p	acetohalobium	(Intercept)	-1.06382	0.0329665	-32.2697	1.00729093183441e-33	1
glutamine_p	acetohalobium	acetohalobium	-497.618	2952.96	-0.168515	0.866901	1
glutamine_p	acetohalobium	intest_surgery1	0.0446388	0.0438544	1.01789	0.313943	1
glycine_p	acetohalobium	(Intercept)	-1.72675	0.0555312	-31.0952	5.33063911732793e-33	1
glycine_p	acetohalobium	acetohalobium	-6091.76	4974.18	-1.22468	0.2268	1
glycine_p	acetohalobium	intest_surgery1	0.123136	0.0738716	1.66689	0.102188	1
histidine_p	acetohalobium	(Intercept)	-2.88789	0.0451128	-64.0149	2.23188209836247e-47	1
histidine_p	acetohalobium	acetohalobium	789.509	4040.96	0.195377	0.84594	1
histidine_p	acetohalobium	intest_surgery1	-0.0128546	0.0600123	-0.214199	0.831319	1
isoleucine_p	acetohalobium	(Intercept)	-3.13084	0.0806101	-38.8393	2.26673878265986e-37	1
isoleucine_p	acetohalobium	acetohalobium	6051.41	7220.61	0.838074	0.406231	1
isoleucine_p	acetohalobium	intest_surgery1	-0.144634	0.107233	-1.34878	0.183871	1
isopropanol_p	acetohalobium	(Intercept)	-4.99711	0.281761	-17.7353	1.86268374982442e-22	1
isopropanol_p	acetohalobium	acetohalobium	-18736.8	25238.7	-0.742384	0.461549	1
isopropanol_p	acetohalobium	intest_surgery1	0.0157056	0.374819	0.0419018	0.966755	1
lactate_p	acetohalobium	(Intercept)	-0.250741	0.082899	-3.02466	0.00402612	1
lactate_p	acetohalobium	acetohalobium	-8896.76	7425.64	-1.19811	0.23688	1
lactate_p	acetohalobium	intest_surgery1	0.156777	0.110278	1.42165	0.161731	1
leucine_p	acetohalobium	(Intercept)	-2.64782	0.0707517	-37.4241	1.2296636969874e-36	1
leucine_p	acetohalobium	acetohalobium	7576.87	6337.56	1.19555	0.237869	1
leucine_p	acetohalobium	intest_surgery1	-0.13151	0.094119	-1.39727	0.168894	1
lysine_p	acetohalobium	(Intercept)	-2.27382	0.0583953	-38.9385	2.01761164124298e-37	1
lysine_p	acetohalobium	acetohalobium	-1901.84	5230.73	-0.36359	0.717795	1
lysine_p	acetohalobium	intest_surgery1	-0.064159	0.0776815	-0.825923	0.413021	1
phenylalanine_p	acetohalobium	(Intercept)	-3.23982	0.0488136	-66.3713	4.15637480405886e-48	1
phenylalanine_p	acetohalobium	acetohalobium	2407.86	4372.46	0.550688	0.584456	1
phenylalanine_p	acetohalobium	intest_surgery1	-0.0665595	0.0649353	-1.02501	0.310604	1
pyruvate_p	acetohalobium	(Intercept)	-3.22742	0.0901755	-35.7904	9.34539721975257e-36	1
pyruvate_p	acetohalobium	acetohalobium	-14070.6	8077.43	-1.74197	0.088055	1
pyruvate_p	acetohalobium	intest_surgery1	0.0318739	0.119958	0.265709	0.791625	1
tryptophan_p	acetohalobium	(Intercept)	-3.34599	0.0617284	-54.205	5.0047495867955e-44	1
tryptophan_p	acetohalobium	acetohalobium	3810.73	5529.3	0.689189	0.494093	1
tryptophan_p	acetohalobium	intest_surgery1	-0.116189	0.0821156	-1.41494	0.163678	1
tyrosine_p	acetohalobium	(Intercept)	-3.02417	0.0768778	-39.3373	1.26739942323269e-37	1
tyrosine_p	acetohalobium	acetohalobium	1853.2	6886.29	0.269114	0.78902	1
tyrosine_p	acetohalobium	intest_surgery1	-0.119541	0.102268	-1.1689	0.248338	1
valine_p	acetohalobium	(Intercept)	-1.80128	0.0655609	-27.4749	1.33046605847113e-30	1
valine_p	acetohalobium	acetohalobium	7409.48	5872.59	1.26171	0.213281	1
valine_p	acetohalobium	intest_surgery1	-0.132076	0.0872138	-1.51439	0.136623	1
acetate_s	acetohalobium	(Intercept)	4.14188	0.0967696	42.8014	2.66732143841145e-39	1
acetate_s	acetohalobium	acetohalobium	5354.09	8668.09	0.617678	0.539769	1
acetate_s	acetohalobium	intest_surgery1	0.14272	0.12873	1.10868	0.273211	1
alanine_s	acetohalobium	(Intercept)	1.07489	0.120477	8.92197	1.11232668478256e-11	1
alanine_s	acetohalobium	acetohalobium	-851.066	10791.7	-0.0788632	0.937476	1
alanine_s	acetohalobium	intest_surgery1	0.343903	0.160267	2.14581	0.0370837	1
aspartate_s	acetohalobium	(Intercept)	0.572049	0.100002	5.72038	7.11424177330514e-07	1
aspartate_s	acetohalobium	acetohalobium	1606.98	8957.64	0.179398	0.858397	1
aspartate_s	acetohalobium	intest_surgery1	-0.227619	0.13303	-1.71104	0.0936679	1
butyrate_s	acetohalobium	(Intercept)	2.44897	0.153415	15.9631	1.31493641034467e-20	1
butyrate_s	acetohalobium	acetohalobium	15329.6	13742	1.11552	0.270297	1
butyrate_s	acetohalobium	intest_surgery1	-0.364878	0.204083	-1.78789	0.0802413	1
formate_s	acetohalobium	(Intercept)	-1.32845	0.100871	-13.1698	2.18825908254714e-17	1
formate_s	acetohalobium	acetohalobium	-1610.94	9035.48	-0.178291	0.859261	1
formate_s	acetohalobium	intest_surgery1	-0.0923655	0.134186	-0.68834	0.494623	1
glucose_s	acetohalobium	(Intercept)	1.01444	0.187645	5.40619	2.10484577524375e-06	1
glucose_s	acetohalobium	acetohalobium	16198.1	16808.2	0.963701	0.340128	1
glucose_s	acetohalobium	intest_surgery1	0.544097	0.249618	2.17971	0.0343227	1
glutamate_s	acetohalobium	(Intercept)	1.27591	0.17366	7.34717	2.43691191855297e-09	1
glutamate_s	acetohalobium	acetohalobium	6771.11	15555.5	0.435287	0.665347	1
glutamate_s	acetohalobium	intest_surgery1	0.0887115	0.231015	0.384008	0.702704	1
glutamine_s	acetohalobium	(Intercept)	0.437386	0.0968452	4.51634	4.22478393013105e-05	1
glutamine_s	acetohalobium	acetohalobium	-1566.54	8674.87	-0.180584	0.857471	1
glutamine_s	acetohalobium	intest_surgery1	-0.193691	0.12883	-1.50346	0.139411	1
histidine_s	acetohalobium	(Intercept)	-0.631801	0.139613	-4.52538	4.10096835372555e-05	1
histidine_s	acetohalobium	acetohalobium	-12985.7	12505.7	-1.03838	0.304408	1
histidine_s	acetohalobium	intest_surgery1	0.0607824	0.185723	0.327275	0.744913	1
isoleucine_s	acetohalobium	(Intercept)	0.645028	0.0995237	6.48115	5.01453855601399e-08	1
isoleucine_s	acetohalobium	acetohalobium	5551.34	8914.79	0.622711	0.536485	1
isoleucine_s	acetohalobium	intest_surgery1	0.0274815	0.132394	0.207574	0.836458	1
lactate_s	acetohalobium	(Intercept)	0.749157	0.155776	4.8092	1.5986416086658e-05	1
lactate_s	acetohalobium	acetohalobium	166.114	13953.6	0.0119048	0.990552	1
lactate_s	acetohalobium	intest_surgery1	0.169674	0.207224	0.818793	0.417037	1
leucine_s	acetohalobium	(Intercept)	0.943099	0.103995	9.0687	6.81048955928312e-12	1
leucine_s	acetohalobium	acetohalobium	3743.59	9315.31	0.401875	0.689598	1
leucine_s	acetohalobium	intest_surgery1	0.126366	0.138342	0.913436	0.365675	1
methylamine_s	acetohalobium	(Intercept)	-1.775	0.258941	-6.85485	1.35719609693265e-08	1
methylamine_s	acetohalobium	acetohalobium	27750.4	23194.6	1.19642	0.237534	1
methylamine_s	acetohalobium	intest_surgery1	-0.759572	0.344462	-2.2051	0.032376	1
phenylalanine_s	acetohalobium	(Intercept)	0.390054	0.100434	3.88368	0.000320601	1
phenylalanine_s	acetohalobium	acetohalobium	4795.55	8996.34	0.533055	0.596507	1
phenylalanine_s	acetohalobium	intest_surgery1	0.207205	0.133605	1.55088	0.127638	1
propionate_s	acetohalobium	(Intercept)	2.87809	0.179264	16.055	1.04599215508275e-20	1
propionate_s	acetohalobium	acetohalobium	4514.96	16057.5	0.281175	0.779811	1
propionate_s	acetohalobium	intest_surgery1	-0.070506	0.23847	-0.29566	0.768792	1
succinate_s	acetohalobium	(Intercept)	-0.578797	0.454204	-1.27431	0.208818	1
succinate_s	acetohalobium	acetohalobium	-37199	40685.1	-0.914314	0.365219	1
succinate_s	acetohalobium	intest_surgery1	1.66028	0.604215	2.74783	0.00848123	1
trimethylamine_s	acetohalobium	(Intercept)	-1.78485	0.186382	-9.57628	1.27093260181297e-12	1
trimethylamine_s	acetohalobium	acetohalobium	6787.3	16695.1	0.406544	0.686188	1
trimethylamine_s	acetohalobium	intest_surgery1	0.229476	0.247939	0.925533	0.359417	1
tyrosine_s	acetohalobium	(Intercept)	0.48058	0.103034	4.66428	2.59160749089814e-05	1
tyrosine_s	acetohalobium	acetohalobium	2061.39	9229.24	0.223354	0.824228	1
tyrosine_s	acetohalobium	intest_surgery1	0.102503	0.137063	0.747855	0.458274	1
valine_s	acetohalobium	(Intercept)	1.07885	0.111917	9.6398	1.03226386728173e-12	1
valine_s	acetohalobium	acetohalobium	3638.53	10024.9	0.36295	0.71827	1
valine_s	acetohalobium	intest_surgery1	0.142015	0.148879	0.953893	0.345018	1
lithocholenic_acid_ba	acetohalobium	(Intercept)	3.44049	0.506949	6.78666	1.72255861314013e-08	1
lithocholenic_acid_ba	acetohalobium	acetohalobium	39555.5	45409.8	0.87108	0.388138	1
lithocholenic_acid_ba	acetohalobium	intest_surgery1	-2.34171	0.67438	-3.47238	0.00111771	1
isolithocholic_acid_ba	acetohalobium	(Intercept)	5.77137	0.456458	12.6438	9.83037618290309e-17	1
isolithocholic_acid_ba	acetohalobium	acetohalobium	58545.6	40887	1.43189	0.158793	1
isolithocholic_acid_ba	acetohalobium	intest_surgery1	-2.20439	0.607213	-3.63035	0.000697011	1
allolithocholic_acid_ba	acetohalobium	(Intercept)	1.97911	0.357286	5.5393	1.33088443214247e-06	1
allolithocholic_acid_ba	acetohalobium	acetohalobium	-553.659	32003.7	-0.0172998	0.986271	1
allolithocholic_acid_ba	acetohalobium	intest_surgery1	-2.05357	0.475287	-4.3207	7.99927470386775e-05	1
x3a_12a_23_nordeoxycholic_acid_ba	acetohalobium	(Intercept)	-3.85192	0.546322	-7.05063	6.84917900271453e-09	1
x3a_12a_23_nordeoxycholic_acid_ba	acetohalobium	acetohalobium	41678.6	48936.6	0.851685	0.398708	1
x3a_12a_23_nordeoxycholic_acid_ba	acetohalobium	intest_surgery1	-0.652302	0.726757	-0.897551	0.374	1
x3_6_diketocholanic_acid_ba	acetohalobium	(Intercept)	3.15612	0.387426	8.14638	1.54155255506002e-10	1
x3_6_diketocholanic_acid_ba	acetohalobium	acetohalobium	6398.04	34703.5	0.184363	0.854522	1
x3_6_diketocholanic_acid_ba	acetohalobium	intest_surgery1	-0.976446	0.515382	-1.89461	0.0643062	1
x8_14_5b_cholenic_acid_3a_12a_diol_ba	acetohalobium	(Intercept)	4.57134	0.51638	8.85267	1.40349346792083e-11	1
x8_14_5b_cholenic_acid_3a_12a_diol_ba	acetohalobium	acetohalobium	54328.6	46254.5	1.17456	0.246088	1
x8_14_5b_cholenic_acid_3a_12a_diol_ba	acetohalobium	intest_surgery1	-2.42445	0.686925	-3.52942	0.000943536	1
x5b_cholenic_acid_7a_ol_3_one_ba	acetohalobium	(Intercept)	3.67128	0.181432	20.235	7.66653518483881e-25	1
x5b_cholenic_acid_7a_ol_3_one_ba	acetohalobium	acetohalobium	18739.4	16251.7	1.15308	0.25471	1
x5b_cholenic_acid_7a_ol_3_one_ba	acetohalobium	intest_surgery1	-0.0885013	0.241354	-0.366687	0.715498	1
x5a_cholanic_acid_3a_ol_6_one_ba	acetohalobium	(Intercept)	2.6176	0.933956	2.8027	0.00733966	1
x5a_cholanic_acid_3a_ol_6_one_ba	acetohalobium	acetohalobium	56062.2	83658.7	0.67013	0.506055	1
x5a_cholanic_acid_3a_ol_6_one_ba	acetohalobium	intest_surgery1	-2.34446	1.24241	-1.88702	0.0653422	1
x3a_hydroxy_12_ketolithocholic_acid_ba	acetohalobium	(Intercept)	0.979372	0.684429	1.43093	0.159065	1
x3a_hydroxy_12_ketolithocholic_acid_ba	acetohalobium	acetohalobium	-7154.13	61307.4	-0.116693	0.907601	1
x3a_hydroxy_12_ketolithocholic_acid_ba	acetohalobium	intest_surgery1	3.53248	0.910476	3.87982	0.000324472	1
lithocholic_acid_ba	acetohalobium	(Intercept)	5.8003	0.457236	12.6856	8.71379006407954e-17	1
lithocholic_acid_ba	acetohalobium	acetohalobium	58213	40956.7	1.42133	0.161822	1
lithocholic_acid_ba	acetohalobium	intest_surgery1	-2.20795	0.608248	-3.63001	0.000697709	1
x5b_cholanic_acid_3b_12a_diol_ba	acetohalobium	(Intercept)	2.3558	0.306276	7.69175	7.37367447635176e-10	1
x5b_cholanic_acid_3b_12a_diol_ba	acetohalobium	acetohalobium	-13251.1	27434.6	-0.483008	0.631332	1
x5b_cholanic_acid_3b_12a_diol_ba	acetohalobium	intest_surgery1	0.454323	0.40743	1.11509	0.27048	1
chenodeoxycholic_acid_cdca_ba	acetohalobium	(Intercept)	0.970478	0.975592	0.994758	0.324948	1
chenodeoxycholic_acid_cdca_ba	acetohalobium	acetohalobium	-37499.3	87388.2	-0.429111	0.669803	1
chenodeoxycholic_acid_cdca_ba	acetohalobium	intest_surgery1	5.75034	1.2978	4.43083	5.59082413556697e-05	1
deoxycholic_acid_dca_ba	acetohalobium	(Intercept)	5.54349	1.07062	5.17784	4.59933773768654e-06	1
deoxycholic_acid_dca_ba	acetohalobium	acetohalobium	118704	95900.2	1.23778	0.221944	1
deoxycholic_acid_dca_ba	acetohalobium	intest_surgery1	-5.04417	1.42421	-3.54173	0.000909531	1
hyodeoxycholic_acid_ba	acetohalobium	(Intercept)	4.00618	0.292018	13.719	4.73031866299467e-18	1
hyodeoxycholic_acid_ba	acetohalobium	acetohalobium	30719.2	26157.3	1.1744	0.246151	1
hyodeoxycholic_acid_ba	acetohalobium	intest_surgery1	-0.214134	0.388463	-0.551234	0.584085	1
isodeoxycholic_acid_ba	acetohalobium	(Intercept)	-2.46225	0.706261	-3.48632	0.00107253	1
isodeoxycholic_acid_ba	acetohalobium	acetohalobium	-49960.9	63263	-0.789734	0.43365	1
isodeoxycholic_acid_ba	acetohalobium	intest_surgery1	1.59411	0.939519	1.69674	0.0963609	1
murocholic_acid_muro_ca_ba	acetohalobium	(Intercept)	1.57091	0.601665	2.61093	0.0120796	1
murocholic_acid_muro_ca_ba	acetohalobium	acetohalobium	-45799.5	53893.9	-0.84981	0.399739	1
murocholic_acid_muro_ca_ba	acetohalobium	intest_surgery1	2.0638	0.800378	2.57854	0.0131144	1
ursodeoxycholic_acid_udca_ba	acetohalobium	(Intercept)	2.84349	0.322722	8.81096	1.6146690187985e-11	1
ursodeoxycholic_acid_udca_ba	acetohalobium	acetohalobium	-16174.2	28907.7	-0.559511	0.57847	1
ursodeoxycholic_acid_udca_ba	acetohalobium	intest_surgery1	1.52239	0.429308	3.54614	0.00089762	1
x3a_hydroxy_7_12_diketo_cholanic_acid_ba	acetohalobium	(Intercept)	-2.34937	0.520909	-4.51013	4.31179618046264e-05	1
x3a_hydroxy_7_12_diketo_cholanic_acid_ba	acetohalobium	acetohalobium	-13688.7	46660.2	-0.29337	0.770531	1
x3a_hydroxy_7_12_diketo_cholanic_acid_ba	acetohalobium	intest_surgery1	2.16325	0.692951	3.12179	0.00307237	1
x5b_cholanic_acid_3a_6a_diol_7_one_ba	acetohalobium	(Intercept)	-2.33731	0.50918	-4.59033	3.31063172943401e-05	1
x5b_cholanic_acid_3a_6a_diol_7_one_ba	acetohalobium	acetohalobium	57001.1	45609.6	1.24976	0.217574	1
x5b_cholanic_acid_3a_6a_diol_7_one_ba	acetohalobium	intest_surgery1	-0.951361	0.677347	-1.40454	0.166733	1
x3_dehydrocholic_acid_ba	acetohalobium	(Intercept)	-0.0393663	0.601957	-0.0653972	0.948135	1
x3_dehydrocholic_acid_ba	acetohalobium	acetohalobium	-62943.7	53920	-1.16735	0.248956	1
x3_dehydrocholic_acid_ba	acetohalobium	intest_surgery1	3.53158	0.800766	4.41025	5.97935007940802e-05	1
cholic_acid_ca_ba	acetohalobium	(Intercept)	3.00587	0.530805	5.66284	8.68324627349542e-07	1
cholic_acid_ca_ba	acetohalobium	acetohalobium	-14090.1	47546.6	-0.296342	0.768274	1
cholic_acid_ca_ba	acetohalobium	intest_surgery1	3.19528	0.706115	4.52515	4.10409939993259e-05	1
hyocholic_acid_hca_ba	acetohalobium	(Intercept)	0.764416	0.236515	3.232	0.00224877	1
hyocholic_acid_hca_ba	acetohalobium	acetohalobium	23211.2	21185.7	1.09561	0.278834	1
hyocholic_acid_hca_ba	acetohalobium	intest_surgery1	-0.320446	0.314629	-1.01849	0.31366	1
glycoursocholanic_acid_ba	acetohalobium	(Intercept)	-4.0371	0.544003	-7.42109	1.88466906558422e-09	1
glycoursocholanic_acid_ba	acetohalobium	acetohalobium	68752.4	48728.8	1.41092	0.164854	1
glycoursocholanic_acid_ba	acetohalobium	intest_surgery1	-1.56273	0.723672	-2.15945	0.0359502	1
glycolithocholic_acid_glca_ba	acetohalobium	(Intercept)	-2.31919	0.299069	-7.75468	5.9320264615525e-10	1
glycolithocholic_acid_glca_ba	acetohalobium	acetohalobium	38972.1	26789	1.45478	0.152377	1
glycolithocholic_acid_glca_ba	acetohalobium	intest_surgery1	-0.282917	0.397843	-0.711128	0.48052	1
glycoursodeoxycholic_acid_gudca_ba	acetohalobium	(Intercept)	-4.72556	0.717976	-6.58177	3.52683056632377e-08	1
glycoursodeoxycholic_acid_gudca_ba	acetohalobium	acetohalobium	4701.04	64312.4	0.0730969	0.942039	1
glycoursodeoxycholic_acid_gudca_ba	acetohalobium	intest_surgery1	2.34249	0.955103	2.45261	0.0179497	1
glycochenodeoxycholic_acid_gcdca_ba	acetohalobium	(Intercept)	1.33953	0.309077	4.33397	7.6626662708894e-05	1
glycochenodeoxycholic_acid_gcdca_ba	acetohalobium	acetohalobium	-20080.1	27685.4	-0.725295	0.471867	1
glycochenodeoxycholic_acid_gcdca_ba	acetohalobium	intest_surgery1	1.08008	0.411156	2.62694	0.0115964	1
glycodeoxycholic_acid_gdca_ba	acetohalobium	(Intercept)	-0.183475	0.548707	-0.334377	0.739583	1
glycodeoxycholic_acid_gdca_ba	acetohalobium	acetohalobium	87360.1	49150.2	1.77741	0.0819715	1
glycodeoxycholic_acid_gdca_ba	acetohalobium	intest_surgery1	-1.53041	0.729929	-2.09666	0.0414319	1
glycocholic_acid_gca_ba	acetohalobium	(Intercept)	0.648394	0.311918	2.07874	0.0431254	1
glycocholic_acid_gca_ba	acetohalobium	acetohalobium	-14697.8	27939.9	-0.526052	0.601326	1
glycocholic_acid_gca_ba	acetohalobium	intest_surgery1	0.952096	0.414935	2.29457	0.0262706	1
taurolithocholic_acid_tlca_ba	acetohalobium	(Intercept)	-2.85675	0.518395	-5.51076	1.46854432345074e-06	1
taurolithocholic_acid_tlca_ba	acetohalobium	acetohalobium	67700.6	46435	1.45797	0.1515	1
taurolithocholic_acid_tlca_ba	acetohalobium	intest_surgery1	-1.07333	0.689606	-1.55644	0.126313	1
taurochenodeoxycholic_acid_tcdca_ba	acetohalobium	(Intercept)	0.187376	0.433292	0.432447	0.667394	1
taurochenodeoxycholic_acid_tcdca_ba	acetohalobium	acetohalobium	-33381.3	38811.9	-0.860079	0.394111	1
taurochenodeoxycholic_acid_tcdca_ba	acetohalobium	intest_surgery1	0.921516	0.576396	1.59876	0.116577	1
taurodeoxycholic_acid_tdca_ba	acetohalobium	(Intercept)	-0.740647	0.488244	-1.51696	0.135975	1
taurodeoxycholic_acid_tdca_ba	acetohalobium	acetohalobium	55416.6	43734.3	1.26712	0.211355	1
taurodeoxycholic_acid_tdca_ba	acetohalobium	intest_surgery1	-1.94178	0.649497	-2.98966	0.00443323	1
tauro_w_muricholic_acid_tw_mca_ba	acetohalobium	(Intercept)	-3.74859	0.761657	-4.92163	1.09590008341696e-05	1
tauro_w_muricholic_acid_tw_mca_ba	acetohalobium	acetohalobium	-23327.6	68225.1	-0.341921	0.733935	1
tauro_w_muricholic_acid_tw_mca_ba	acetohalobium	intest_surgery1	1.3439	1.01321	1.32638	0.191124	1
taurocholic_acid_tca_ba	acetohalobium	(Intercept)	0.938236	0.366865	2.55744	0.0138311	1
taurocholic_acid_tca_ba	acetohalobium	acetohalobium	-29337.3	32861.8	-0.892748	0.376541	1
taurocholic_acid_tca_ba	acetohalobium	intest_surgery1	0.863183	0.48803	1.76871	0.0834321	1
x2_hydroxybutyrate_p	acetomicrobium	(Intercept)	-3.40192	0.122099	-27.8618	7.15676238037959e-31	1
x2_hydroxybutyrate_p	acetomicrobium	acetomicrobium	-42511.9	54377.2	-0.781797	0.438255	1
x2_hydroxybutyrate_p	acetomicrobium	intest_surgery1	-0.279211	0.157516	-1.77259	0.0827778	1
x3_hydroxybutyrate_p	acetomicrobium	(Intercept)	-3.25796	0.206061	-15.8107	1.9258629956583e-20	1
x3_hydroxybutyrate_p	acetomicrobium	acetomicrobium	141736	91769.4	1.54448	0.129179	1
x3_hydroxybutyrate_p	acetomicrobium	intest_surgery1	-0.211272	0.265831	-0.79476	0.430748	1
x3_hydroxyisovalerate_p	acetomicrobium	(Intercept)	-4.64723	0.0208114	-223.303	8.92182962950983e-73	1
x3_hydroxyisovalerate_p	acetomicrobium	acetomicrobium	3740.15	9268.37	0.40354	0.688381	1
x3_hydroxyisovalerate_p	acetomicrobium	intest_surgery1	-0.0256581	0.0268479	-0.955681	0.344123	1
acetate_p	acetomicrobium	(Intercept)	-2.76397	0.051977	-53.1769	1.21368421550767e-43	1
acetate_p	acetomicrobium	acetomicrobium	21621.1	23148	0.934036	0.355059	1
acetate_p	acetomicrobium	intest_surgery1	-0.0661472	0.0670535	-0.986485	0.328946	1
acetoacetate_p	acetomicrobium	(Intercept)	-3.71892	0.120962	-30.7445	8.86458223518073e-33	1
acetoacetate_p	acetomicrobium	acetomicrobium	36659.3	53870.8	0.680504	0.499524	1
acetoacetate_p	acetomicrobium	intest_surgery1	-0.130298	0.156049	-0.834982	0.407952	1
alanine_p	acetomicrobium	(Intercept)	-1.41018	0.0524035	-26.9101	3.33546246713628e-30	1
alanine_p	acetomicrobium	acetomicrobium	-29408.4	23338	-1.26011	0.21385	1
alanine_p	acetomicrobium	intest_surgery1	0.0544973	0.0676037	0.806129	0.424228	1
citrate_p	acetomicrobium	(Intercept)	-2.38962	0.0629556	-37.9572	6.45846369203795e-37	1
citrate_p	acetomicrobium	acetomicrobium	13739.9	28037.4	0.490055	0.626375	1
citrate_p	acetomicrobium	intest_surgery1	-0.105847	0.0812166	-1.30327	0.19883	1
creatinine_p	acetomicrobium	(Intercept)	-3.62364	0.0702287	-51.5977	4.88991019771822e-43	1
creatinine_p	acetomicrobium	acetomicrobium	-4415.83	31276.4	-0.141187	0.888325	1
creatinine_p	acetomicrobium	intest_surgery1	-0.16117	0.0905993	-1.77893	0.0817187	1
formate_p	acetomicrobium	(Intercept)	-2.84198	0.0648434	-43.8283	8.98920803662434e-40	1
formate_p	acetomicrobium	acetomicrobium	-23807	28878.1	-0.824395	0.413879	1
formate_p	acetomicrobium	intest_surgery1	0.129223	0.0836519	1.54477	0.12911	1
glucose_p	acetomicrobium	(Intercept)	1.14867	0.0237275	48.4111	9.2672048983843e-42	1
glucose_p	acetomicrobium	acetomicrobium	461.787	10567.1	0.0437006	0.965328	1
glucose_p	acetomicrobium	intest_surgery1	-0.054388	0.0306099	-1.77681	0.0820713	1
glutamine_p	acetomicrobium	(Intercept)	-1.06021	0.0340801	-31.1092	5.22355758774272e-33	1
glutamine_p	acetomicrobium	acetomicrobium	-5305.6	15177.6	-0.349567	0.728225	1
glutamine_p	acetomicrobium	intest_surgery1	0.0430766	0.0439654	0.979784	0.33221	1
glycine_p	acetomicrobium	(Intercept)	-1.69176	0.0552983	-30.5934	1.10546438205109e-32	1
glycine_p	acetomicrobium	acetomicrobium	-57088.7	24627.2	-2.31812	0.0248445	1
glycine_p	acetomicrobium	intest_surgery1	0.106023	0.0713382	1.4862	0.143904	1
histidine_p	acetomicrobium	(Intercept)	-2.87259	0.0465986	-61.6454	1.28719301805689e-46	1
histidine_p	acetomicrobium	acetomicrobium	-9491.96	20752.8	-0.457383	0.649503	1
histidine_p	acetomicrobium	intest_surgery1	-0.0149562	0.0601151	-0.248792	0.804606	1
isoleucine_p	acetomicrobium	(Intercept)	-3.06875	0.0836122	-36.7021	2.98195465837045e-36	1
isoleucine_p	acetomicrobium	acetomicrobium	-25773.5	37236.8	-0.692151	0.492248	1
isoleucine_p	acetomicrobium	intest_surgery1	-0.148728	0.107865	-1.37884	0.174472	1
isopropanol_p	acetomicrobium	(Intercept)	-5.20689	0.291629	-17.8545	1.4147873338727e-22	1
isopropanol_p	acetomicrobium	acetomicrobium	94725.9	129877	0.729349	0.469407	1
isopropanol_p	acetomicrobium	intest_surgery1	0.0321983	0.376219	0.0855839	0.932161	1
lactate_p	acetomicrobium	(Intercept)	-0.226454	0.0847976	-2.67052	0.010369	1
lactate_p	acetomicrobium	acetomicrobium	-60538.8	37764.8	-1.60305	0.115624	1
lactate_p	acetomicrobium	intest_surgery1	0.137624	0.109394	1.25806	0.214586	1
leucine_p	acetomicrobium	(Intercept)	-2.60822	0.0743196	-35.0947	2.27571400698875e-35	1
leucine_p	acetomicrobium	acetomicrobium	219.649	33098.4	0.00663625	0.994733	1
leucine_p	acetomicrobium	intest_surgery1	-0.128327	0.0958769	-1.33846	0.187187	1
lysine_p	acetomicrobium	(Intercept)	-2.22462	0.0582153	-38.2136	4.75234350594122e-37	1
lysine_p	acetomicrobium	acetomicrobium	-50428.7	25926.3	-1.94508	0.0577613	1
lysine_p	acetomicrobium	intest_surgery1	-0.0778399	0.0751013	-1.03647	0.305288	1
phenylalanine_p	acetomicrobium	(Intercept)	-3.21178	0.0504938	-63.6075	3.00283579083705e-47	1
phenylalanine_p	acetomicrobium	acetomicrobium	-13093.7	22487.5	-0.582267	0.56317	1
phenylalanine_p	acetomicrobium	intest_surgery1	-0.0689144	0.0651401	-1.05794	0.29549	1
pyruvate_p	acetomicrobium	(Intercept)	-3.24265	0.0948738	-34.1786	7.53490844854295e-35	1
pyruvate_p	acetomicrobium	acetomicrobium	-50055.3	42252.2	-1.18468	0.2421	1
pyruvate_p	acetomicrobium	intest_surgery1	0.0132672	0.122393	0.108398	0.914141	1
tryptophan_p	acetomicrobium	(Intercept)	-3.31126	0.0640684	-51.6832	4.52991882206876e-43	1
tryptophan_p	acetomicrobium	acetomicrobium	-12510.6	28532.9	-0.438461	0.663061	1
tryptophan_p	acetomicrobium	intest_surgery1	-0.117815	0.0826521	-1.42544	0.160639	1
tyrosine_p	acetomicrobium	(Intercept)	-3.01225	0.079613	-37.8362	7.46916271786617e-37	1
tyrosine_p	acetomicrobium	acetomicrobium	-1845.44	35455.8	-0.0520492	0.95871	1
tyrosine_p	acetomicrobium	intest_surgery1	-0.119249	0.102706	-1.16107	0.251476	1
valine_p	acetomicrobium	(Intercept)	-1.76174	0.0689824	-25.539	3.33926723895548e-29	1
valine_p	acetomicrobium	acetomicrobium	-484.634	30721.4	-0.0157751	0.987481	1
valine_p	acetomicrobium	intest_surgery1	-0.129142	0.0889915	-1.45118	0.153373	1
acetate_s	acetomicrobium	(Intercept)	4.12816	0.0998629	41.3383	1.31240388287701e-38	1
acetate_s	acetomicrobium	acetomicrobium	35667.3	44474.1	0.80198	0.426601	1
acetate_s	acetomicrobium	intest_surgery1	0.15405	0.128829	1.19577	0.237785	1
alanine_s	acetomicrobium	(Intercept)	1.14714	0.122828	9.3394	2.77190227512158e-12	1
alanine_s	acetomicrobium	acetomicrobium	-65347.9	54701.8	-1.19462	0.23823	1
alanine_s	acetomicrobium	intest_surgery1	0.32684	0.158456	2.06265	0.0446958	1
aspartate_s	acetomicrobium	(Intercept)	0.537901	0.102834	5.23075	3.83961455890766e-06	1
aspartate_s	acetomicrobium	acetomicrobium	36282	45797.4	0.792227	0.432209	1
aspartate_s	acetomicrobium	intest_surgery1	-0.217677	0.132663	-1.64083	0.107508	1
butyrate_s	acetomicrobium	(Intercept)	2.29305	0.146684	15.6326	3.01782413684039e-20	1
butyrate_s	acetomicrobium	acetomicrobium	201470	65326	3.08407	0.00341435	1
butyrate_s	acetomicrobium	intest_surgery1	-0.307031	0.189231	-1.62252	0.111382	1
formate_s	acetomicrobium	(Intercept)	-1.25224	0.101711	-12.3118	2.58428410645416e-16	1
formate_s	acetomicrobium	acetomicrobium	-72126	45296.9	-1.59229	0.118023	1
formate_s	acetomicrobium	intest_surgery1	-0.111475	0.131213	-0.849574	0.399869	1
glucose_s	acetomicrobium	(Intercept)	0.990088	0.19369	5.11171	5.76011401860291e-06	1
glucose_s	acetomicrobium	acetomicrobium	93303.5	86260.2	1.08165	0.284926	1
glucose_s	acetomicrobium	intest_surgery1	0.574642	0.249872	2.29974	0.025951	1
glutamate_s	acetomicrobium	(Intercept)	1.33734	0.179923	7.43287	1.8090887145529e-09	1
glutamate_s	acetomicrobium	acetomicrobium	-21991.2	80129	-0.274447	0.784944	1
glutamate_s	acetomicrobium	intest_surgery1	0.0858817	0.232112	0.370002	0.713043	1
glutamine_s	acetomicrobium	(Intercept)	0.464985	0.0997516	4.66143	2.61626290577097e-05	1
glutamine_s	acetomicrobium	acetomicrobium	-30523.3	44424.5	-0.687082	0.495408	1
glutamine_s	acetomicrobium	intest_surgery1	-0.202144	0.128686	-1.57083	0.12293	1
histidine_s	acetomicrobium	(Intercept)	-0.624708	0.144599	-4.32027	8.010485117453e-05	1
histidine_s	acetomicrobium	acetomicrobium	-64211.7	64397.5	-0.997115	0.323815	1
histidine_s	acetomicrobium	intest_surgery1	0.0390031	0.186542	0.209085	0.835285	1
isoleucine_s	acetomicrobium	(Intercept)	0.726118	0.102394	7.09139	5.94103531654389e-09	1
isoleucine_s	acetomicrobium	acetomicrobium	-44194.5	45601.4	-0.969148	0.337433	1
isoleucine_s	acetomicrobium	intest_surgery1	0.0184703	0.132095	0.139826	0.889395	1
lactate_s	acetomicrobium	(Intercept)	0.815978	0.160146	5.09522	6.09212679810647e-06	1
lactate_s	acetomicrobium	acetomicrobium	-56166	71321.1	-0.787508	0.434938	1
lactate_s	acetomicrobium	intest_surgery1	0.155379	0.206598	0.752084	0.455751	1
leucine_s	acetomicrobium	(Intercept)	0.989015	0.107551	9.19574	4.46198272328139e-12	1
leucine_s	acetomicrobium	acetomicrobium	-22335.8	47898.2	-0.466319	0.643141	1
leucine_s	acetomicrobium	intest_surgery1	0.122199	0.138748	0.880726	0.382948	1
methylamine_s	acetomicrobium	(Intercept)	-1.8856	0.262422	-7.18536	4.28108801852769e-09	1
methylamine_s	acetomicrobium	acetomicrobium	218499	116870	1.86959	0.0677778	1
methylamine_s	acetomicrobium	intest_surgery1	-0.692245	0.338541	-2.04479	0.0464982	1
phenylalanine_s	acetomicrobium	(Intercept)	0.477482	0.10279	4.64523	2.76067143769045e-05	1
phenylalanine_s	acetomicrobium	acetomicrobium	-52979	45777.6	-1.15731	0.252992	1
phenylalanine_s	acetomicrobium	intest_surgery1	0.195636	0.132605	1.47533	0.146793	1
propionate_s	acetomicrobium	(Intercept)	2.87061	0.185456	15.4786	4.46153948383814e-20	1
propionate_s	acetomicrobium	acetomicrobium	26595.1	82593.1	0.322001	0.748879	1
propionate_s	acetomicrobium	intest_surgery1	-0.0618418	0.23925	-0.258482	0.797163	1
succinate_s	acetomicrobium	(Intercept)	-0.11683	0.437256	-0.267189	0.790492	1
succinate_s	acetomicrobium	acetomicrobium	-560084	194733	-2.87617	0.00603319	1
succinate_s	acetomicrobium	intest_surgery1	1.5017	0.564087	2.66218	0.0105943	1
trimethylamine_s	acetomicrobium	(Intercept)	-1.81973	0.192204	-9.46772	1.81541350840868e-12	1
trimethylamine_s	acetomicrobium	acetomicrobium	60112.1	85598.2	0.702258	0.485982	1
trimethylamine_s	acetomicrobium	intest_surgery1	0.247649	0.247955	0.998767	0.323022	1
tyrosine_s	acetomicrobium	(Intercept)	0.533182	0.10604	5.02815	7.64804372569934e-06	1
tyrosine_s	acetomicrobium	acetomicrobium	-35566.2	47224.9	-0.753123	0.455132	1
tyrosine_s	acetomicrobium	intest_surgery1	0.0942588	0.136798	0.689039	0.494187	1
valine_s	acetomicrobium	(Intercept)	1.17584	0.113924	10.3213	1.14273672799128e-13	1
valine_s	acetomicrobium	acetomicrobium	-66300.7	50736	-1.30678	0.197647	1
valine_s	acetomicrobium	intest_surgery1	0.126561	0.146968	0.861147	0.393529	1
lithocholenic_acid_ba	acetomicrobium	(Intercept)	3.19044	0.513142	6.21745	1.26055579551803e-07	1
lithocholenic_acid_ba	acetomicrobium	acetomicrobium	390162	228529	1.70728	0.0943698	1
lithocholenic_acid_ba	acetomicrobium	intest_surgery1	-2.22561	0.661985	-3.36202	0.00154539	1
isolithocholic_acid_ba	acetomicrobium	(Intercept)	5.52614	0.457204	12.0868	5.01451410830398e-16	1
isolithocholic_acid_ba	acetomicrobium	acetomicrobium	471122	203616	2.31377	0.0251022	1
isolithocholic_acid_ba	acetomicrobium	intest_surgery1	-2.05975	0.589821	-3.49217	0.00105407	1
allolithocholic_acid_ba	acetomicrobium	(Intercept)	1.6274	0.356693	4.56248	3.62934452365828e-05	1
allolithocholic_acid_ba	acetomicrobium	acetomicrobium	297061	158854	1.87003	0.0677151	1
allolithocholic_acid_ba	acetomicrobium	intest_surgery1	-1.97783	0.460155	-4.29819	8.60380167646095e-05	1
x3a_12a_23_nordeoxycholic_acid_ba	acetomicrobium	(Intercept)	-4.17486	0.549246	-7.60107	1.00930120070001e-09	1
x3a_12a_23_nordeoxycholic_acid_ba	acetomicrobium	acetomicrobium	461742	244608	1.88768	0.0652514	1
x3a_12a_23_nordeoxycholic_acid_ba	acetomicrobium	intest_surgery1	-0.517023	0.708561	-0.72968	0.469207	1
x3_6_diketocholanic_acid_ba	acetomicrobium	(Intercept)	3.01465	0.398072	7.57313	1.11188009149978e-09	1
x3_6_diketocholanic_acid_ba	acetomicrobium	acetomicrobium	149146	177282	0.841294	0.404444	1
x3_6_diketocholanic_acid_ba	acetomicrobium	intest_surgery1	-0.935664	0.513537	-1.822	0.0748216	1
x8_14_5b_cholenic_acid_3a_12a_diol_ba	acetomicrobium	(Intercept)	4.22455	0.512625	8.24102	1.1151872325078e-10	1
x8_14_5b_cholenic_acid_3a_12a_diol_ba	acetomicrobium	acetomicrobium	538718	228298	2.35971	0.0224939	1
x8_14_5b_cholenic_acid_3a_12a_diol_ba	acetomicrobium	intest_surgery1	-2.26427	0.661318	-3.42387	0.00128959	1
x5b_cholenic_acid_7a_ol_3_one_ba	acetomicrobium	(Intercept)	3.72183	0.189913	19.5975	2.95230527723857e-24	1
x5b_cholenic_acid_7a_ol_3_one_ba	acetomicrobium	acetomicrobium	40887.2	84578.2	0.483425	0.631039	1
x5b_cholenic_acid_7a_ol_3_one_ba	acetomicrobium	intest_surgery1	-0.0703126	0.245	-0.28699	0.775381	1
x5a_cholanic_acid_3a_ol_6_one_ba	acetomicrobium	(Intercept)	2.29267	0.955559	2.3993	0.0204441	1
x5a_cholanic_acid_3a_ol_6_one_ba	acetomicrobium	acetomicrobium	527868	425560	1.24041	0.220981	1
x5a_cholanic_acid_3a_ol_6_one_ba	acetomicrobium	intest_surgery1	-2.18634	1.23273	-1.77358	0.0826127	1
x3a_hydroxy_12_ketolithocholic_acid_ba	acetomicrobium	(Intercept)	1.86565	0.65981	2.82755	0.00687099	1
x3a_hydroxy_12_ketolithocholic_acid_ba	acetomicrobium	acetomicrobium	-786871	293847	-2.67782	0.0101756	1
x3a_hydroxy_12_ketolithocholic_acid_ba	acetomicrobium	intest_surgery1	3.3283	0.851195	3.91015	0.000295234	1
lithocholic_acid_ba	acetomicrobium	(Intercept)	5.54993	0.457595	12.1285	4.43314531219705e-16	1
lithocholic_acid_ba	acetomicrobium	acetomicrobium	474010	203791	2.32597	0.0243847	1
lithocholic_acid_ba	acetomicrobium	intest_surgery1	-2.06271	0.590326	-3.49419	0.00104778	1
x5b_cholanic_acid_3b_12a_diol_ba	acetomicrobium	(Intercept)	2.37904	0.316664	7.51282	1.37056467182397e-09	1
x5b_cholanic_acid_3b_12a_diol_ba	acetomicrobium	acetomicrobium	-79154.5	141027	-0.561273	0.577278	1
x5b_cholanic_acid_3b_12a_diol_ba	acetomicrobium	intest_surgery1	0.428613	0.408516	1.04919	0.299454	1
chenodeoxycholic_acid_cdca_ba	acetomicrobium	(Intercept)	2.36067	0.909456	2.5957	0.0125566	1
chenodeoxycholic_acid_cdca_ba	acetomicrobium	acetomicrobium	-1.35198e+06	405027	-3.338	0.0016572	1
chenodeoxycholic_acid_cdca_ba	acetomicrobium	intest_surgery1	5.38913	1.17325	4.59332	3.2781290359159e-05	1
deoxycholic_acid_dca_ba	acetomicrobium	(Intercept)	4.8565	1.06472	4.56131	3.64343097421722e-05	1
deoxycholic_acid_dca_ba	acetomicrobium	acetomicrobium	1.11683e+06	474173	2.35532	0.0227321	1
deoxycholic_acid_dca_ba	acetomicrobium	intest_surgery1	-4.70958	1.37355	-3.42877	0.00127116	1
hyodeoxycholic_acid_ba	acetomicrobium	(Intercept)	3.96372	0.301256	13.1573	2.26664641946101e-17	1
hyodeoxycholic_acid_ba	acetomicrobium	acetomicrobium	173768	134165	1.29519	0.201582	1
hyodeoxycholic_acid_ba	acetomicrobium	intest_surgery1	-0.15702	0.388638	-0.404026	0.688026	1
isodeoxycholic_acid_ba	acetomicrobium	(Intercept)	-2.89284	0.734189	-3.94018	0.000268807	1
isodeoxycholic_acid_ba	acetomicrobium	acetomicrobium	142919	326972	0.437097	0.664043	1
isodeoxycholic_acid_ba	acetomicrobium	intest_surgery1	1.61005	0.947149	1.69989	0.0957618	1
murocholic_acid_muro_ca_ba	acetomicrobium	(Intercept)	2.12416	0.586963	3.61889	0.000721519	1
murocholic_acid_muro_ca_ba	acetomicrobium	acetomicrobium	-676356	261405	-2.58739	0.0128239	1
murocholic_acid_muro_ca_ba	acetomicrobium	intest_surgery1	1.87194	0.757219	2.47213	0.0171076	1
ursodeoxycholic_acid_udca_ba	acetomicrobium	(Intercept)	3.24236	0.306671	10.5728	5.14670558410156e-14	1
ursodeoxycholic_acid_udca_ba	acetomicrobium	acetomicrobium	-412158	136576	-3.01778	0.00410326	1
ursodeoxycholic_acid_udca_ba	acetomicrobium	intest_surgery1	1.41031	0.395624	3.56478	0.000848939	1
x3a_hydroxy_7_12_diketo_cholanic_acid_ba	acetomicrobium	(Intercept)	-1.77968	0.508978	-3.49657	0.00104039	1
x3a_hydroxy_7_12_diketo_cholanic_acid_ba	acetomicrobium	acetomicrobium	-546512	226674	-2.411	0.0198712	1
x3a_hydroxy_7_12_diketo_cholanic_acid_ba	acetomicrobium	intest_surgery1	2.01784	0.656613	3.0731	0.00352025	1
x5b_cholanic_acid_3a_6a_diol_7_one_ba	acetomicrobium	(Intercept)	-2.3786	0.527069	-4.51289	4.27284570379601e-05	1
x5b_cholanic_acid_3a_6a_diol_7_one_ba	acetomicrobium	acetomicrobium	290515	234731	1.23765	0.221993	1
x5b_cholanic_acid_3a_6a_diol_7_one_ba	acetomicrobium	intest_surgery1	-0.853546	0.679951	-1.25531	0.215573	1
x3_dehydrocholic_acid_ba	acetomicrobium	(Intercept)	0.661765	0.562464	1.17655	0.245301	1
x3_dehydrocholic_acid_ba	acetomicrobium	acetomicrobium	-879101	250494	-3.50947	0.00100128	1
x3_dehydrocholic_acid_ba	acetomicrobium	intest_surgery1	3.28079	0.725613	4.52141	4.15491616496345e-05	1
cholic_acid_ca_ba	acetomicrobium	(Intercept)	3.73948	0.501507	7.45649	1.66657044313608e-09	1
cholic_acid_ca_ba	acetomicrobium	acetomicrobium	-687924	223347	-3.08007	0.00345259	1
cholic_acid_ca_ba	acetomicrobium	intest_surgery1	3.01354	0.646975	4.65789	2.64712454709108e-05	1
hyocholic_acid_hca_ba	acetomicrobium	(Intercept)	0.723426	0.243644	2.96919	0.00468876	1
hyocholic_acid_hca_ba	acetomicrobium	acetomicrobium	138887	108507	1.27998	0.206835	1
hyocholic_acid_hca_ba	acetomicrobium	intest_surgery1	-0.27535	0.314315	-0.876032	0.385468	1
glycoursocholanic_acid_ba	acetomicrobium	(Intercept)	-3.75705	0.574288	-6.54209	4.05191620129997e-08	1
glycoursocholanic_acid_ba	acetomicrobium	acetomicrobium	69470.1	255760	0.271622	0.787102	1
glycoursocholanic_acid_ba	acetomicrobium	intest_surgery1	-1.5166	0.740867	-2.04706	0.046266	1
glycolithocholic_acid_glca_ba	acetomicrobium	(Intercept)	-2.13169	0.316334	-6.73874	2.03677472466385e-08	1
glycolithocholic_acid_glca_ba	acetomicrobium	acetomicrobium	14892.8	140880	0.105713	0.91626	1
glycolithocholic_acid_glca_ba	acetomicrobium	intest_surgery1	-0.263028	0.40809	-0.644533	0.522364	1
glycoursodeoxycholic_acid_gudca_ba	acetomicrobium	(Intercept)	-3.98157	0.715411	-5.56544	1.21604898810439e-06	1
glycoursodeoxycholic_acid_gudca_ba	acetomicrobium	acetomicrobium	-612578	318609	-1.92266	0.0605945	1
glycoursodeoxycholic_acid_gudca_ba	acetomicrobium	intest_surgery1	2.18778	0.922924	2.37049	0.0219183	1
glycochenodeoxycholic_acid_gcdca_ba	acetomicrobium	(Intercept)	1.46102	0.31532	4.63346	2.87045467113134e-05	1
glycochenodeoxycholic_acid_gcdca_ba	acetomicrobium	acetomicrobium	-193424	140428	-1.37739	0.174916	1
glycochenodeoxycholic_acid_gcdca_ba	acetomicrobium	intest_surgery1	1.02233	0.406782	2.51322	0.0154505	1
glycodeoxycholic_acid_gdca_ba	acetomicrobium	(Intercept)	-0.354531	0.559589	-0.633556	0.529442	1
glycodeoxycholic_acid_gdca_ba	acetomicrobium	acetomicrobium	537021	249214	2.15486	0.0363281	1
glycodeoxycholic_acid_gdca_ba	acetomicrobium	intest_surgery1	-1.35703	0.721904	-1.8798	0.0663424	1
glycocholic_acid_gca_ba	acetomicrobium	(Intercept)	0.731831	0.320604	2.28266	0.0270189	1
glycocholic_acid_gca_ba	acetomicrobium	acetomicrobium	-136901	142782	-0.958816	0.342558	1
glycocholic_acid_gca_ba	acetomicrobium	intest_surgery1	0.911021	0.413599	2.20267	0.0325581	1
taurolithocholic_acid_tlca_ba	acetomicrobium	(Intercept)	-2.82402	0.540969	-5.22031	3.97902816074818e-06	1
taurolithocholic_acid_tlca_ba	acetomicrobium	acetomicrobium	275399	240921	1.14311	0.258783	1
taurolithocholic_acid_tlca_ba	acetomicrobium	intest_surgery1	-0.974963	0.697883	-1.39703	0.168966	1
taurochenodeoxycholic_acid_tcdca_ba	acetomicrobium	(Intercept)	0.340659	0.442481	0.769885	0.445221	1
taurochenodeoxycholic_acid_tcdca_ba	acetomicrobium	acetomicrobium	-280083	197059	-1.42131	0.161828	1
taurochenodeoxycholic_acid_tcdca_ba	acetomicrobium	intest_surgery1	0.836116	0.570827	1.46475	0.149648	1
taurodeoxycholic_acid_tdca_ba	acetomicrobium	(Intercept)	-0.930247	0.495964	-1.87563	0.0669246	1
taurodeoxycholic_acid_tdca_ba	acetomicrobium	acetomicrobium	409722	220878	1.85497	0.0698798	1
taurodeoxycholic_acid_tdca_ba	acetomicrobium	intest_surgery1	-1.81413	0.639824	-2.83536	0.00672955	1
tauro_w_muricholic_acid_tw_mca_ba	acetomicrobium	(Intercept)	-2.99949	0.750745	-3.99535	0.00022609	1
tauro_w_muricholic_acid_tw_mca_ba	acetomicrobium	acetomicrobium	-742495	334346	-2.22074	0.0312253	1
tauro_w_muricholic_acid_tw_mca_ba	acetomicrobium	intest_surgery1	1.1444	0.968508	1.18161	0.243305	1
taurocholic_acid_tca_ba	acetomicrobium	(Intercept)	1.13079	0.370413	3.05278	0.00372473	1
taurocholic_acid_tca_ba	acetomicrobium	acetomicrobium	-295414	164964	-1.79078	0.0797708	1
taurocholic_acid_tca_ba	acetomicrobium	intest_surgery1	0.775531	0.477856	1.62294	0.111292	1
x2_hydroxybutyrate_p	acholeplasma	(Intercept)	-3.4383	0.131461	-26.1544	1.17190865848e-29	1
x2_hydroxybutyrate_p	acholeplasma	acholeplasma	-829.823	4873.21	-0.170283	0.865519	1
x2_hydroxybutyrate_p	acholeplasma	intest_surgery1	-0.268768	0.157889	-1.70226	0.0953133	1
x3_hydroxybutyrate_p	acholeplasma	(Intercept)	-3.07132	0.225973	-13.5915	6.72655446826337e-18	1
x3_hydroxybutyrate_p	acholeplasma	acholeplasma	-1239.56	8376.72	-0.147977	0.882994	1
x3_hydroxybutyrate_p	acholeplasma	intest_surgery1	-0.248158	0.271401	-0.91436	0.365195	1
x3_hydroxyisovalerate_p	acholeplasma	(Intercept)	-4.66101	0.0218732	-213.092	8.03321492828049e-72	1
x3_hydroxyisovalerate_p	acholeplasma	acholeplasma	1114.07	810.83	1.37399	0.175962	1
x3_hydroxyisovalerate_p	acholeplasma	intest_surgery1	-0.0260393	0.0262704	-0.991204	0.326662	1
acetate_p	acholeplasma	(Intercept)	-2.76385	0.0558008	-49.5307	3.22894774151757e-42	1
acetate_p	acholeplasma	acholeplasma	1549.39	2068.51	0.749038	0.457567	1
acetate_p	acholeplasma	intest_surgery1	-0.0708764	0.0670184	-1.05757	0.295659	1
acetoacetate_p	acholeplasma	(Intercept)	-3.66709	0.130057	-28.196	4.21551906542675e-31	1
acetoacetate_p	acholeplasma	acholeplasma	-539.275	4821.16	-0.111856	0.911414	1
acetoacetate_p	acholeplasma	intest_surgery1	-0.139951	0.156202	-0.89596	0.37484	1
alanine_p	acholeplasma	(Intercept)	-1.45667	0.0569418	-25.5818	3.10242914229614e-29	1
alanine_p	acholeplasma	acholeplasma	733.383	2110.8	0.347442	0.72981	1
alanine_p	acholeplasma	intest_surgery1	0.0623966	0.0683887	0.912381	0.366225	1
citrate_p	acholeplasma	(Intercept)	-2.38997	0.0674217	-35.4482	1.44494933598499e-35	1
citrate_p	acholeplasma	acholeplasma	1011.03	2499.29	0.404527	0.68766	1
citrate_p	acholeplasma	intest_surgery1	-0.108839	0.0809754	-1.3441	0.185368	1
creatinine_p	acholeplasma	(Intercept)	-3.67251	0.0744228	-49.3466	3.83409808346135e-42	1
creatinine_p	acholeplasma	acholeplasma	2678.96	2758.82	0.971053	0.336493	1
creatinine_p	acholeplasma	intest_surgery1	-0.158658	0.089384	-1.77501	0.0823722	1
formate_p	acholeplasma	(Intercept)	-2.87249	0.0698842	-41.1035	1.70311312641739e-38	1
formate_p	acholeplasma	acholeplasma	156.736	2590.57	0.0605023	0.952012	1
formate_p	acholeplasma	intest_surgery1	0.135392	0.083933	1.61309	0.11342	1
glucose_p	acholeplasma	(Intercept)	1.14815	0.0253893	45.2218	2.13490748667877e-40	1
glucose_p	acholeplasma	acholeplasma	65.4044	941.169	0.0694928	0.944892	1
glucose_p	acholeplasma	intest_surgery1	-0.0544724	0.0304933	-1.78637	0.0804905	1
glutamine_p	acholeplasma	(Intercept)	-1.05962	0.0364785	-29.0479	1.12089815879837e-31	1
glutamine_p	acholeplasma	acholeplasma	-417.696	1352.24	-0.308891	0.758769	1
glutamine_p	acholeplasma	intest_surgery1	0.0442178	0.0438118	1.00927	0.318015	1
glycine_p	acholeplasma	(Intercept)	-1.70265	0.060978	-27.9224	6.4993181352356e-31	1
glycine_p	acholeplasma	acholeplasma	-3442.39	2260.43	-1.5229	0.134485	1
glycine_p	acholeplasma	intest_surgery1	0.118845	0.0732364	1.62276	0.111331	1
histidine_p	acholeplasma	(Intercept)	-2.91859	0.0492623	-59.2458	8.12837239886076e-46	1
histidine_p	acholeplasma	acholeplasma	2136.78	1826.13	1.17011	0.247855	1
histidine_p	acholeplasma	intest_surgery1	-0.0114255	0.0591655	-0.193111	0.847704	1
isoleucine_p	acholeplasma	(Intercept)	-3.13067	0.0896008	-34.9401	2.77932956695174e-35	1
isoleucine_p	acholeplasma	acholeplasma	1941.26	3321.46	0.58446	0.561706	1
isoleucine_p	acholeplasma	intest_surgery1	-0.141135	0.107613	-1.3115	0.196059	1
isopropanol_p	acholeplasma	(Intercept)	-5.03522	0.313486	-16.062	1.02788199892901e-20	1
isopropanol_p	acholeplasma	acholeplasma	-3706.42	11620.8	-0.318949	0.751179	1
isopropanol_p	acholeplasma	intest_surgery1	0.0060604	0.376505	0.0160964	0.987226	1
lactate_p	acholeplasma	(Intercept)	-0.223455	0.0914569	-2.44328	0.0183651	1
lactate_p	acholeplasma	acholeplasma	-4542.47	3390.26	-1.33986	0.186734	1
lactate_p	acholeplasma	intest_surgery1	0.15076	0.109842	1.37251	0.176418	1
leucine_p	acholeplasma	(Intercept)	-2.65481	0.0787201	-33.7246	1.37885402480282e-34	1
leucine_p	acholeplasma	acholeplasma	2872.3	2918.12	0.984298	0.330009	1
leucine_p	acholeplasma	intest_surgery1	-0.1269	0.0945452	-1.34222	0.185974	1
lysine_p	acholeplasma	(Intercept)	-2.27672	0.0647305	-35.1723	2.05902547053591e-35	1
lysine_p	acholeplasma	acholeplasma	-435.869	2399.53	-0.181648	0.85664	1
lysine_p	acholeplasma	intest_surgery1	-0.0651688	0.0777433	-0.838257	0.406129	1
phenylalanine_p	acholeplasma	(Intercept)	-3.2749	0.0529889	-61.8035	1.1428561877167e-46	1
phenylalanine_p	acholeplasma	acholeplasma	2927.47	1964.27	1.49036	0.142811	1
phenylalanine_p	acholeplasma	intest_surgery1	-0.0640544	0.0636412	-1.00649	0.319332	1
pyruvate_p	acholeplasma	(Intercept)	-3.22766	0.101477	-31.8067	1.92980259775283e-33	1
pyruvate_p	acholeplasma	acholeplasma	-4523.06	3761.72	-1.20239	0.235234	1
pyruvate_p	acholeplasma	intest_surgery1	0.0237325	0.121877	0.194725	0.846448	1
tryptophan_p	acholeplasma	(Intercept)	-3.38311	0.067299	-50.2698	1.63007339771297e-42	1
tryptophan_p	acholeplasma	acholeplasma	3505.15	2494.74	1.40502	0.166592	1
tryptophan_p	acholeplasma	intest_surgery1	-0.112806	0.0808281	-1.39563	0.169384	1
tyrosine_p	acholeplasma	(Intercept)	-3.07502	0.0839298	-36.638	3.22870813421471e-36	1
tyrosine_p	acholeplasma	acholeplasma	3716.01	3111.24	1.19438	0.238322	1
tyrosine_p	acholeplasma	intest_surgery1	-0.116858	0.100802	-1.15928	0.252197	1
valine_p	acholeplasma	(Intercept)	-1.81185	0.0728421	-24.8737	1.06190691707781e-28	1
valine_p	acholeplasma	acholeplasma	3037.71	2700.22	1.12499	0.266307	1
valine_p	acholeplasma	intest_surgery1	-0.12745	0.0874855	-1.45681	0.151816	1
acetate_s	acholeplasma	(Intercept)	4.15288	0.10751	38.628	2.90665866805008e-37	1
acetate_s	acholeplasma	acholeplasma	1051.93	3985.33	0.263951	0.792972	1
acetate_s	acholeplasma	intest_surgery1	0.145472	0.129122	1.12662	0.265621	1
alanine_s	acholeplasma	(Intercept)	1.16555	0.131426	8.86846	1.33100120915828e-11	1
alanine_s	acholeplasma	acholeplasma	-5833.39	4871.91	-1.19735	0.237174	1
alanine_s	acholeplasma	intest_surgery1	0.34054	0.157847	2.15741	0.0361181	1
aspartate_s	acholeplasma	(Intercept)	0.587677	0.110759	5.30592	2.96919716157374e-06	1
aspartate_s	acholeplasma	acholeplasma	-440.014	4105.78	-0.107169	0.915111	1
aspartate_s	acholeplasma	intest_surgery1	-0.227183	0.133025	-1.70783	0.094267	1
butyrate_s	acholeplasma	(Intercept)	2.35869	0.167101	14.1154	1.60202436420047e-18	1
butyrate_s	acholeplasma	acholeplasma	10479.7	6194.34	1.69182	0.0973004	1
butyrate_s	acholeplasma	intest_surgery1	-0.353142	0.200693	-1.75962	0.0849807	1
formate_s	acholeplasma	(Intercept)	-1.33394	0.111732	-11.9387	7.78536895444985e-16	1
formate_s	acholeplasma	acholeplasma	-182.888	4141.86	-0.0441559	0.964967	1
formate_s	acholeplasma	intest_surgery1	-0.0931247	0.134194	-0.693957	0.491125	1
glucose_s	acholeplasma	(Intercept)	1.07667	0.209753	5.13304	5.35725469798487e-06	1
glucose_s	acholeplasma	acholeplasma	1408.54	7775.44	0.181152	0.857027	1
glucose_s	acholeplasma	intest_surgery1	0.551508	0.251919	2.18923	0.0335815	1
glutamate_s	acholeplasma	(Intercept)	1.38384	0.191893	7.21152	3.90801090740404e-09	1
glutamate_s	acholeplasma	acholeplasma	-4434.35	7113.38	-0.623382	0.536047	1
glutamate_s	acholeplasma	intest_surgery1	0.089216	0.230469	0.387106	0.700425	1
glutamine_s	acholeplasma	(Intercept)	0.483226	0.10648	4.5382	3.93160298452901e-05	1
glutamine_s	acholeplasma	acholeplasma	-3316.07	3947.15	-0.840118	0.405096	1
glutamine_s	acholeplasma	intest_surgery1	-0.19605	0.127885	-1.53302	0.131976	1
histidine_s	acholeplasma	(Intercept)	-0.564191	0.152882	-3.69037	0.000581071	1
histidine_s	acholeplasma	acholeplasma	-8333.76	5667.27	-1.47051	0.148088	1
histidine_s	acholeplasma	intest_surgery1	0.0511212	0.183616	0.278414	0.781916	1
isoleucine_s	acholeplasma	(Intercept)	0.721828	0.110061	6.55844	3.82670554099555e-08	1
isoleucine_s	acholeplasma	acholeplasma	-2918.82	4079.9	-0.715414	0.477893	1
isoleucine_s	acholeplasma	intest_surgery1	0.0282652	0.132186	0.213828	0.831606	1
lactate_s	acholeplasma	(Intercept)	0.820104	0.171664	4.77739	1.77812644669322e-05	1
lactate_s	acholeplasma	acholeplasma	-4296.78	6363.49	-0.675223	0.502842	1
lactate_s	acholeplasma	intest_surgery1	0.167524	0.206173	0.812539	0.420579	1
leucine_s	acholeplasma	(Intercept)	1.01914	0.11455	8.89698	1.20953244359131e-11	1
leucine_s	acholeplasma	acholeplasma	-3455.6	4246.3	-0.813792	0.419868	1
leucine_s	acholeplasma	intest_surgery1	0.126127	0.137577	0.91677	0.363943	1
methylamine_s	acholeplasma	(Intercept)	-1.88133	0.284629	-6.60978	3.19769560597917e-08	1
methylamine_s	acholeplasma	acholeplasma	15469.8	10551	1.46618	0.149258	1
methylamine_s	acholeplasma	intest_surgery1	-0.740134	0.341847	-2.1651	0.0354896	1
phenylalanine_s	acholeplasma	(Intercept)	0.49275	0.109971	4.48071	4.74884998836856e-05	1
phenylalanine_s	acholeplasma	acholeplasma	-4750.49	4076.58	-1.16531	0.249773	1
phenylalanine_s	acholeplasma	intest_surgery1	0.206732	0.132079	1.56521	0.124242	1
propionate_s	acholeplasma	(Intercept)	2.96247	0.198131	14.9521	1.73397131911008e-19	1
propionate_s	acholeplasma	acholeplasma	-3718.34	7344.6	-0.506268	0.615035	1
propionate_s	acholeplasma	intest_surgery1	-0.0705627	0.237961	-0.296531	0.768131	1
succinate_s	acholeplasma	(Intercept)	-0.0967433	0.480333	-0.201409	0.841248	1
succinate_s	acholeplasma	acholeplasma	-41555.8	17805.7	-2.33385	0.0239309	1
succinate_s	acholeplasma	intest_surgery1	1.62348	0.576895	2.81416	0.00711992	1
trimethylamine_s	acholeplasma	(Intercept)	-1.70546	0.206479	-8.25974	1.04609280727323e-10	1
trimethylamine_s	acholeplasma	acholeplasma	-2678.77	7654.08	-0.34998	0.727917	1
trimethylamine_s	acholeplasma	intest_surgery1	0.230894	0.247988	0.931069	0.356576	1
tyrosine_s	acholeplasma	(Intercept)	0.573821	0.112408	5.1048	5.89696762925569e-06	1
tyrosine_s	acholeplasma	acholeplasma	-5052.5	4166.91	-1.21253	0.23137	1
tyrosine_s	acholeplasma	intest_surgery1	0.100745	0.135005	0.746234	0.459243	1
valine_s	acholeplasma	(Intercept)	1.18108	0.122471	9.6437	1.0191643038714e-12	1
valine_s	acholeplasma	acholeplasma	-5094.73	4539.95	-1.1222	0.267478	1
valine_s	acholeplasma	intest_surgery1	0.140886	0.147092	0.95781	0.34306	1
lithocholenic_acid_ba	acholeplasma	(Intercept)	3.29775	0.559504	5.89406	3.89210293991079e-07	1
lithocholenic_acid_ba	acholeplasma	acholeplasma	21509.9	20740.5	1.03709	0.304999	1
lithocholenic_acid_ba	acholeplasma	intest_surgery1	-2.31428	0.671981	-3.44397	0.00121553	1
isolithocholic_acid_ba	acholeplasma	(Intercept)	5.44932	0.493473	11.0428	1.18414004838527e-14	1
isolithocholic_acid_ba	acholeplasma	acholeplasma	38629.3	18292.8	2.11172	0.0400548	1
isolithocholic_acid_ba	acholeplasma	intest_surgery1	-2.16029	0.592676	-3.64498	0.000666855	1
allolithocholic_acid_ba	acholeplasma	(Intercept)	1.81472	0.393708	4.6093	3.10947332083977e-05	1
allolithocholic_acid_ba	acholeplasma	acholeplasma	9901.56	14594.6	0.678441	0.500819	1
allolithocholic_acid_ba	acholeplasma	intest_surgery1	-2.04869	0.472855	-4.33259	7.69699269725744e-05	1
x3a_12a_23_nordeoxycholic_acid_ba	acholeplasma	(Intercept)	-4.31892	0.58669	-7.3615	2.31844667433796e-09	1
x3a_12a_23_nordeoxycholic_acid_ba	acholeplasma	acholeplasma	42077.5	21748.3	1.93475	0.059053	1
x3a_12a_23_nordeoxycholic_acid_ba	acholeplasma	intest_surgery1	-0.613379	0.704632	-0.870495	0.388454	1
x3_6_diketocholanic_acid_ba	acholeplasma	(Intercept)	3.30436	0.428269	7.71563	6.78928292376934e-10	1
x3_6_diketocholanic_acid_ba	acholeplasma	acholeplasma	-7026.66	15875.7	-0.442604	0.660083	1
x3_6_diketocholanic_acid_ba	acholeplasma	intest_surgery1	-0.977433	0.514364	-1.90028	0.0635407	1
x8_14_5b_cholenic_acid_3a_12a_diol_ba	acholeplasma	(Intercept)	4.36291	0.567744	7.68463	7.55749305168601e-10	1
x8_14_5b_cholenic_acid_3a_12a_diol_ba	acholeplasma	acholeplasma	30302.3	21046	1.43981	0.156548	1
x8_14_5b_cholenic_acid_3a_12a_diol_ba	acholeplasma	intest_surgery1	-2.38639	0.681878	-3.49973	0.00103069	1
x5b_cholenic_acid_7a_ol_3_one_ba	acholeplasma	(Intercept)	3.80651	0.203533	18.7021	2.08165196175868e-23	1
x5b_cholenic_acid_7a_ol_3_one_ba	acholeplasma	acholeplasma	-2248.49	7544.89	-0.298015	0.767005	1
x5b_cholenic_acid_7a_ol_3_one_ba	acholeplasma	intest_surgery1	-0.0819296	0.24445	-0.33516	0.738996	1
x5a_cholanic_acid_3a_ol_6_one_ba	acholeplasma	(Intercept)	2.13565	1.02208	2.08953	0.0420989	1
x5a_cholanic_acid_3a_ol_6_one_ba	acholeplasma	acholeplasma	47632.8	37887.8	1.2572	0.214891	1
x5a_cholanic_acid_3a_ol_6_one_ba	acholeplasma	intest_surgery1	-2.29674	1.22754	-1.871	0.0675772	1
x3a_hydroxy_12_ketolithocholic_acid_ba	acholeplasma	(Intercept)	1.72707	0.733927	2.3532	0.0228484	1
x3a_hydroxy_12_ketolithocholic_acid_ba	acholeplasma	acholeplasma	-48155	27206.3	-1.76999	0.0832152	1
x3a_hydroxy_12_ketolithocholic_acid_ba	acholeplasma	intest_surgery1	3.50466	0.881468	3.97594	0.000240307	1
lithocholic_acid_ba	acholeplasma	(Intercept)	5.47682	0.494251	11.081	1.05199278063587e-14	1
lithocholic_acid_ba	acholeplasma	acholeplasma	38610.1	18321.6	2.10735	0.0404503	1
lithocholic_acid_ba	acholeplasma	intest_surgery1	-2.16399	0.59361	-3.64548	0.000665845	1
x5b_cholanic_acid_3b_12a_diol_ba	acholeplasma	(Intercept)	2.44871	0.337716	7.2508	3.40823706549288e-09	1
x5b_cholanic_acid_3b_12a_diol_ba	acholeplasma	acholeplasma	-9970.68	12519	-0.796446	0.429777	1
x5b_cholanic_acid_3b_12a_diol_ba	acholeplasma	intest_surgery1	0.443707	0.405607	1.09393	0.279559	1
chenodeoxycholic_acid_cdca_ba	acholeplasma	(Intercept)	1.87776	1.04909	1.78989	0.0799147	1
chenodeoxycholic_acid_cdca_ba	acholeplasma	acholeplasma	-67726.7	38889.2	-1.74153	0.0881332	1
chenodeoxycholic_acid_cdca_ba	acholeplasma	intest_surgery1	5.6999	1.25999	4.52378	4.12263798451448e-05	1
deoxycholic_acid_dca_ba	acholeplasma	(Intercept)	4.71482	1.15255	4.09079	0.000167225	1
deoxycholic_acid_dca_ba	acholeplasma	acholeplasma	89095.6	42724.4	2.08536	0.0424929	1
deoxycholic_acid_dca_ba	acholeplasma	intest_surgery1	-4.94919	1.38424	-3.57538	0.0008224	1
hyodeoxycholic_acid_ba	acholeplasma	(Intercept)	4.02918	0.32636	12.3458	2.33887434574318e-16	1
hyodeoxycholic_acid_ba	acholeplasma	acholeplasma	8496.85	12098	0.702335	0.485934	1
hyodeoxycholic_acid_ba	acholeplasma	intest_surgery1	-0.197071	0.391967	-0.502773	0.617472	1
isodeoxycholic_acid_ba	acholeplasma	(Intercept)	-2.96104	0.785168	-3.77121	0.000453844	1
isodeoxycholic_acid_ba	acholeplasma	acholeplasma	14471.7	29105.8	0.497209	0.62136	1
isodeoxycholic_acid_ba	acholeplasma	intest_surgery1	1.58097	0.94301	1.67652	0.100278	1
murocholic_acid_muro_ca_ba	acholeplasma	(Intercept)	1.86728	0.658702	2.83479	0.00673973	1
murocholic_acid_muro_ca_ba	acholeplasma	acholeplasma	-32944.1	24417.8	-1.34919	0.183741	1
murocholic_acid_muro_ca_ba	acholeplasma	intest_surgery1	2.0279	0.79112	2.56332	0.0136278	1
ursodeoxycholic_acid_udca_ba	acholeplasma	(Intercept)	3.08329	0.349873	8.81262	1.60569342668672e-11	1
ursodeoxycholic_acid_udca_ba	acholeplasma	acholeplasma	-19920.5	12969.6	-1.53594	0.131259	1
ursodeoxycholic_acid_udca_ba	acholeplasma	intest_surgery1	1.50543	0.420207	3.58258	0.000804809	1
x3a_hydroxy_7_12_diketo_cholanic_acid_ba	acholeplasma	(Intercept)	-1.71503	0.551615	-3.10911	0.00318357	1
x3a_hydroxy_7_12_diketo_cholanic_acid_ba	acholeplasma	acholeplasma	-43311.2	20448.1	-2.1181	0.039483	1
x3a_hydroxy_7_12_diketo_cholanic_acid_ba	acholeplasma	intest_surgery1	2.13524	0.662506	3.22297	0.00230749	1
x5b_cholanic_acid_3a_6a_diol_7_one_ba	acholeplasma	(Intercept)	-2.68039	0.551728	-4.85817	1.3565896960148e-05	1
x5b_cholanic_acid_3a_6a_diol_7_one_ba	acholeplasma	acholeplasma	39420.8	20452.3	1.92745	0.0599793	1
x5b_cholanic_acid_3a_6a_diol_7_one_ba	acholeplasma	intest_surgery1	-0.907486	0.662641	-1.3695	0.177352	1
x3_dehydrocholic_acid_ba	acholeplasma	(Intercept)	0.677226	0.627126	1.07989	0.285703	1
x3_dehydrocholic_acid_ba	acholeplasma	acholeplasma	-64240.3	23247.3	-2.76335	0.00814278	1
x3_dehydrocholic_acid_ba	acholeplasma	intest_surgery1	3.47244	0.753197	4.61026	3.09955965690631e-05	1
cholic_acid_ca_ba	acholeplasma	(Intercept)	3.60838	0.565216	6.38408	7.0413237250289e-08	1
cholic_acid_ca_ba	acholeplasma	acholeplasma	-41489.5	20952.3	-1.98019	0.0535531	1
cholic_acid_ca_ba	acholeplasma	intest_surgery1	3.16804	0.678841	4.66684	2.56969009089435e-05	1
hyocholic_acid_hca_ba	acholeplasma	(Intercept)	0.697693	0.26128	2.67029	0.0103752	1
hyocholic_acid_hca_ba	acholeplasma	acholeplasma	11577.2	9685.52	1.19531	0.237961	1
hyocholic_acid_hca_ba	acholeplasma	intest_surgery1	-0.304891	0.313805	-0.971593	0.336227	1
glycoursocholanic_acid_ba	acholeplasma	(Intercept)	-4.32657	0.59461	-7.27632	3.11841905240734e-09	1
glycoursocholanic_acid_ba	acholeplasma	acholeplasma	39923.5	22041.9	1.81125	0.0764949	1
glycoursocholanic_acid_ba	acholeplasma	intest_surgery1	-1.51375	0.714144	-2.11967	0.0393434	1
glycolithocholic_acid_glca_ba	acholeplasma	(Intercept)	-2.26956	0.336459	-6.74543	1.98970860859636e-08	1
glycolithocholic_acid_glca_ba	acholeplasma	acholeplasma	9525.87	12472.4	0.763758	0.448829	1
glycolithocholic_acid_glca_ba	acholeplasma	intest_surgery1	-0.261918	0.404097	-0.648156	0.520038	1
glycoursodeoxycholic_acid_gudca_ba	acholeplasma	(Intercept)	-4.53644	0.794087	-5.71277	7.30424892326326e-07	1
glycoursodeoxycholic_acid_gudca_ba	acholeplasma	acholeplasma	-10080.4	29436.4	-0.342448	0.733541	1
glycoursodeoxycholic_acid_gudca_ba	acholeplasma	intest_surgery1	2.33923	0.953721	2.45274	0.0179439	1
glycochenodeoxycholic_acid_gcdca_ba	acholeplasma	(Intercept)	1.46887	0.339456	4.32712	7.83454538491427e-05	1
glycochenodeoxycholic_acid_gcdca_ba	acholeplasma	acholeplasma	-14407.1	12583.5	-1.14492	0.258039	1
glycochenodeoxycholic_acid_gcdca_ba	acholeplasma	intest_surgery1	1.06436	0.407697	2.61066	0.0120881	1
glycodeoxycholic_acid_gdca_ba	acholeplasma	(Intercept)	-0.465283	0.601661	-0.773331	0.443199	1
glycodeoxycholic_acid_gdca_ba	acholeplasma	acholeplasma	45454.8	22303.3	2.03803	0.0471964	1
glycodeoxycholic_acid_gdca_ba	acholeplasma	intest_surgery1	-1.4709	0.722612	-2.03553	0.0474575	1
glycocholic_acid_gca_ba	acholeplasma	(Intercept)	0.851685	0.339728	2.50696	0.0156931	1
glycocholic_acid_gca_ba	acholeplasma	acholeplasma	-17205.7	12593.6	-1.36623	0.17837	1
glycocholic_acid_gca_ba	acholeplasma	intest_surgery1	0.937147	0.408024	2.2968	0.0261324	1
taurolithocholic_acid_tlca_ba	acholeplasma	(Intercept)	-2.62319	0.586122	-4.4755	4.83063508448037e-05	1
taurolithocholic_acid_tlca_ba	acholeplasma	acholeplasma	7513.13	21727.3	0.345793	0.731042	1
taurolithocholic_acid_tlca_ba	acholeplasma	intest_surgery1	-1.04151	0.70395	-1.47953	0.145672	1
taurochenodeoxycholic_acid_tcdca_ba	acholeplasma	(Intercept)	0.296985	0.478634	0.620486	0.537935	1
taurochenodeoxycholic_acid_tcdca_ba	acholeplasma	acholeplasma	-17487	17742.7	-0.985588	0.329382	1
taurochenodeoxycholic_acid_tcdca_ba	acholeplasma	intest_surgery1	0.898713	0.574853	1.56338	0.124673	1
taurodeoxycholic_acid_tdca_ba	acholeplasma	(Intercept)	-0.806585	0.542996	-1.48544	0.144106	1
taurodeoxycholic_acid_tdca_ba	acholeplasma	acholeplasma	21915.8	20128.6	1.08879	0.281798	1
taurodeoxycholic_acid_tdca_ba	acholeplasma	intest_surgery1	-1.90759	0.652154	-2.92507	0.00528726	1
tauro_w_muricholic_acid_tw_mca_ba	acholeplasma	(Intercept)	-2.87782	0.809712	-3.55413	0.00087644	1
tauro_w_muricholic_acid_tw_mca_ba	acholeplasma	acholeplasma	-60917.7	30015.6	-2.02953	0.0480874	1
tauro_w_muricholic_acid_tw_mca_ba	acholeplasma	intest_surgery1	1.30282	0.972488	1.33968	0.186791	1
taurocholic_acid_tca_ba	acholeplasma	(Intercept)	1.24508	0.394268	3.15795	0.00277503	1
taurocholic_acid_tca_ba	acholeplasma	acholeplasma	-28276.9	14615.3	-1.93474	0.0590537	1
taurocholic_acid_tca_ba	acholeplasma	intest_surgery1	0.836477	0.473528	1.76648	0.0838093	1
x2_hydroxybutyrate_p	achromobacter	(Intercept)	-3.33378	0.155632	-21.4209	6.81608869893816e-26	1
x2_hydroxybutyrate_p	achromobacter	achromobacter	-1957.01	1925.07	-1.01659	0.314555	1
x2_hydroxybutyrate_p	achromobacter	intest_surgery1	-0.311814	0.161958	-1.92528	0.0602576	1
x3_hydroxybutyrate_p	achromobacter	(Intercept)	-3.17391	0.269946	-11.7576	1.3385841431605e-15	1
x3_hydroxybutyrate_p	achromobacter	achromobacter	1365.57	3339.07	0.408967	0.684421	1
x3_hydroxybutyrate_p	achromobacter	intest_surgery1	-0.217182	0.280918	-0.773117	0.443324	1
x3_hydroxyisovalerate_p	achromobacter	(Intercept)	-4.65914	0.0264993	-175.821	6.67366153219604e-68	1
x3_hydroxyisovalerate_p	achromobacter	achromobacter	270.286	327.781	0.824595	0.413767	1
x3_hydroxyisovalerate_p	achromobacter	intest_surgery1	-0.0206102	0.0275764	-0.747386	0.458553	1
acetate_p	achromobacter	(Intercept)	-2.78062	0.0666549	-41.7166	8.64835578877825e-39	1
acetate_p	achromobacter	achromobacter	696.79	824.481	0.845126	0.402322	1
acetate_p	achromobacter	intest_surgery1	-0.0561975	0.0693641	-0.810182	0.421919	1
acetoacetate_p	achromobacter	(Intercept)	-3.60799	0.155059	-23.2685	1.93853350388638e-27	1
acetoacetate_p	achromobacter	achromobacter	-1125.45	1917.98	-0.586787	0.560155	1
acetoacetate_p	achromobacter	intest_surgery1	-0.164674	0.161361	-1.02053	0.312701	1
alanine_p	achromobacter	(Intercept)	-1.45902	0.0681573	-21.4067	7.01192311587056e-26	1
alanine_p	achromobacter	achromobacter	237.242	843.064	0.281405	0.779635	1
alanine_p	achromobacter	intest_surgery1	0.0672882	0.0709275	0.94869	0.347631	1
citrate_p	achromobacter	(Intercept)	-2.43268	0.0799734	-30.4186	1.42887764384317e-32	1
citrate_p	achromobacter	achromobacter	981.228	989.221	0.991919	0.326316	1
citrate_p	achromobacter	intest_surgery1	-0.0875635	0.0832238	-1.05214	0.298113	1
creatinine_p	achromobacter	(Intercept)	-3.63807	0.0899128	-40.4621	3.49632626813556e-38	1
creatinine_p	achromobacter	achromobacter	153.231	1112.17	0.137777	0.891005	1
creatinine_p	achromobacter	intest_surgery1	-0.156637	0.0935672	-1.67406	0.100763	1
formate_p	achromobacter	(Intercept)	-2.83531	0.0833409	-34.0206	9.29069784972552e-35	1
formate_p	achromobacter	achromobacter	-573.975	1030.88	-0.556784	0.580317	1
formate_p	achromobacter	intest_surgery1	0.12256	0.0867282	1.41315	0.1642	1
glucose_p	achromobacter	(Intercept)	1.13988	0.0303234	37.5908	1.00448151024037e-36	1
glucose_p	achromobacter	achromobacter	154.771	375.082	0.412632	0.681752	1
glucose_p	achromobacter	intest_surgery1	-0.0510679	0.0315558	-1.61834	0.112283	1
glutamine_p	achromobacter	(Intercept)	-1.05937	0.0436667	-24.2603	3.15974563210027e-28	1
glutamine_p	achromobacter	achromobacter	-117.191	540.13	-0.216969	0.829172	1
glutamine_p	achromobacter	intest_surgery1	0.0418301	0.0454415	0.920526	0.361999	1
glycine_p	achromobacter	(Intercept)	-1.69091	0.0735472	-22.9909	3.25918263581835e-27	1
glycine_p	achromobacter	achromobacter	-1125.29	909.733	-1.23695	0.222252	1
glycine_p	achromobacter	intest_surgery1	0.0956241	0.0765364	1.24939	0.217707	1
histidine_p	achromobacter	(Intercept)	-2.88267	0.0597913	-48.2123	1.1202797182666e-41	1
histidine_p	achromobacter	achromobacter	-17.6475	739.581	-0.0238614	0.981064	1
histidine_p	achromobacter	intest_surgery1	-0.0129208	0.0622214	-0.207659	0.836393	1
isoleucine_p	achromobacter	(Intercept)	-2.96715	0.104457	-28.4054	3.03370007292791e-31	1
isoleucine_p	achromobacter	achromobacter	-2185.85	1292.07	-1.69174	0.0973167	1
isoleucine_p	achromobacter	intest_surgery1	-0.190695	0.108703	-1.75428	0.0859012	1
isopropanol_p	achromobacter	(Intercept)	-4.83324	0.37195	-12.9943	3.59824281735769e-17	1
isopropanol_p	achromobacter	achromobacter	-4350.4	4600.8	-0.945576	0.349201	1
isopropanol_p	achromobacter	intest_surgery1	-0.0886685	0.387068	-0.229077	0.819803	1
lactate_p	achromobacter	(Intercept)	-0.198524	0.1098	-1.80805	0.0769992	1
lactate_p	achromobacter	achromobacter	-1641.4	1358.15	-1.20855	0.23288	1
lactate_p	achromobacter	intest_surgery1	0.116642	0.114262	1.02083	0.31256	1
leucine_p	achromobacter	(Intercept)	-2.54476	0.0943438	-26.9733	3.00709422199425e-30	1
leucine_p	achromobacter	achromobacter	-1047.8	1166.97	-0.897881	0.373826	1
leucine_p	achromobacter	intest_surgery1	-0.15166	0.0981783	-1.54474	0.129117	1
lysine_p	achromobacter	(Intercept)	-2.18819	0.0751834	-29.1047	1.02737751104765e-31	1
lysine_p	achromobacter	achromobacter	-1585.44	929.973	-1.70482	0.0948303	1
lysine_p	achromobacter	intest_surgery1	-0.100164	0.0782392	-1.28022	0.206749	1
phenylalanine_p	achromobacter	(Intercept)	-3.20656	0.0647535	-49.5194	3.26298779687449e-42	1
phenylalanine_p	achromobacter	achromobacter	-341.476	800.961	-0.426332	0.671812	1
phenylalanine_p	achromobacter	intest_surgery1	-0.0731517	0.0673854	-1.08557	0.283205	1
pyruvate_p	achromobacter	(Intercept)	-3.26256	0.12303	-26.5184	6.37287114678449e-30	1
pyruvate_p	achromobacter	achromobacter	-644.173	1521.81	-0.423294	0.674011	1
pyruvate_p	achromobacter	intest_surgery1	0.0117578	0.128031	0.0918355	0.927219	1
tryptophan_p	achromobacter	(Intercept)	-3.32179	0.0821886	-40.4167	3.68076504570336e-38	1
tryptophan_p	achromobacter	achromobacter	-68.8904	1016.62	-0.067764	0.946261	1
tryptophan_p	achromobacter	intest_surgery1	-0.116146	0.0855291	-1.35798	0.180955	1
tyrosine_p	achromobacter	(Intercept)	-3.02377	0.101913	-29.6702	4.35319640319502e-32	1
tyrosine_p	achromobacter	achromobacter	155.111	1260.6	0.123046	0.902596	1
tyrosine_p	achromobacter	intest_surgery1	-0.115331	0.106055	-1.08746	0.282377	1
valine_p	achromobacter	(Intercept)	-1.70011	0.0874755	-19.4353	4.18416925735387e-24	1
valine_p	achromobacter	achromobacter	-1031.12	1082.02	-0.952956	0.345488	1
valine_p	achromobacter	intest_surgery1	-0.151924	0.0910309	-1.66893	0.10178	1
acetate_s	achromobacter	(Intercept)	4.27896	0.12695	33.7057	1.41424798054727e-34	1
acetate_s	achromobacter	achromobacter	-1805.61	1570.3	-1.14985	0.256022	1
acetate_s	achromobacter	intest_surgery1	0.104818	0.13211	0.793413	0.431525	1
alanine_s	achromobacter	(Intercept)	1.15541	0.158756	7.2779	3.10127722435923e-09	1
alanine_s	achromobacter	achromobacter	-1409.06	1963.72	-0.717545	0.476589	1
alanine_s	achromobacter	intest_surgery1	0.31225	0.165209	1.89003	0.0649294	1
aspartate_s	achromobacter	(Intercept)	0.523087	0.132056	3.9611	0.000251759	1
aspartate_s	achromobacter	achromobacter	951.794	1633.45	0.582689	0.562888	1
aspartate_s	achromobacter	intest_surgery1	-0.205812	0.137423	-1.49765	0.140911	1
butyrate_s	achromobacter	(Intercept)	2.26337	0.199237	11.3602	4.46163375542935e-15	1
butyrate_s	achromobacter	achromobacter	4413.55	2464.44	1.79089	0.0797522	1
butyrate_s	achromobacter	intest_surgery1	-0.260508	0.207335	-1.25646	0.215159	1
formate_s	achromobacter	(Intercept)	-1.20375	0.131124	-9.18024	4.69775413101268e-12	1
formate_s	achromobacter	achromobacter	-2207.78	1621.92	-1.36122	0.179937	1
formate_s	achromobacter	intest_surgery1	-0.142075	0.136453	-1.0412	0.303108	1
glucose_s	achromobacter	(Intercept)	1.076	0.251001	4.28685	8.92484630517926e-05	1
glucose_s	achromobacter	achromobacter	391.836	3104.73	0.126206	0.900107	1
glucose_s	achromobacter	intest_surgery1	0.559486	0.261203	2.14196	0.0374094	1
glutamate_s	achromobacter	(Intercept)	1.26972	0.23039	5.51118	1.46641512481302e-06	1
glutamate_s	achromobacter	achromobacter	692.958	2849.79	0.243161	0.808939	1
glutamate_s	achromobacter	intest_surgery1	0.106899	0.239754	0.44587	0.657738	1
glutamine_s	achromobacter	(Intercept)	0.500935	0.12758	3.92645	0.00028059	1
glutamine_s	achromobacter	achromobacter	-1190.1	1578.08	-0.754143	0.454526	1
glutamine_s	achromobacter	intest_surgery1	-0.220775	0.132765	-1.66291	0.102987	1
histidine_s	achromobacter	(Intercept)	-0.518374	0.18367	-2.82231	0.00696744	1
histidine_s	achromobacter	achromobacter	-3012.64	2271.89	-1.32605	0.191231	1
histidine_s	achromobacter	intest_surgery1	-0.0115006	0.191135	-0.0601701	0.952275	1
isoleucine_s	achromobacter	(Intercept)	0.745086	0.131669	5.65877	8.80664369011695e-07	1
isoleucine_s	achromobacter	achromobacter	-1174.69	1628.67	-0.721258	0.474323	1
isoleucine_s	achromobacter	intest_surgery1	0.00367688	0.137021	0.0268344	0.978705	1
lactate_s	achromobacter	(Intercept)	0.857114	0.205314	4.17465	0.000128008	1
lactate_s	achromobacter	achromobacter	-1775.21	2539.61	-0.699008	0.487992	1
lactate_s	achromobacter	intest_surgery1	0.130307	0.213659	0.609882	0.544878	1
leucine_s	achromobacter	(Intercept)	1.00178	0.137803	7.26967	3.19141680072099e-09	1
leucine_s	achromobacter	achromobacter	-646.395	1704.54	-0.37922	0.706232	1
leucine_s	achromobacter	intest_surgery1	0.113552	0.143404	0.791832	0.432437	1
methylamine_s	achromobacter	(Intercept)	-2.22978	0.327841	-6.80141	1.635999493981e-08	1
methylamine_s	achromobacter	achromobacter	9958.87	4055.19	2.45583	0.0178082	1
methylamine_s	achromobacter	intest_surgery1	-0.526889	0.341166	-1.54438	0.129204	1
phenylalanine_s	achromobacter	(Intercept)	0.521871	0.131824	3.95885	0.000253544	1
phenylalanine_s	achromobacter	achromobacter	-1767.1	1630.58	-1.08372	0.284016	1
phenylalanine_s	achromobacter	intest_surgery1	0.169929	0.137182	1.23871	0.221603	1
propionate_s	achromobacter	(Intercept)	2.9996	0.236927	12.6605	9.36934191303359e-17	1
propionate_s	achromobacter	achromobacter	-1620.72	2930.64	-0.553026	0.582867	1
propionate_s	achromobacter	intest_surgery1	-0.104647	0.246556	-0.424433	0.673187	1
succinate_s	achromobacter	(Intercept)	0.698507	0.53444	1.30699	0.197575	1
succinate_s	achromobacter	achromobacter	-24418.4	6610.69	-3.69377	0.00057508	1
succinate_s	achromobacter	intest_surgery1	1.10249	0.556161	1.98231	0.0533076	1
trimethylamine_s	achromobacter	(Intercept)	-1.73619	0.247348	-7.01924	7.64258459579502e-09	1
trimethylamine_s	achromobacter	achromobacter	-214.798	3059.54	-0.0702058	0.944328	1
trimethylamine_s	achromobacter	intest_surgery1	0.227505	0.257401	0.883853	0.381274	1
tyrosine_s	achromobacter	(Intercept)	0.580061	0.135473	4.28176	9.07271125339722e-05	1
tyrosine_s	achromobacter	achromobacter	-1469.44	1675.71	-0.876902	0.385	1
tyrosine_s	achromobacter	intest_surgery1	0.0707111	0.140979	0.501573	0.61831	1
valine_s	achromobacter	(Intercept)	1.20227	0.147073	8.17462	1.39945657027384e-10	1
valine_s	achromobacter	achromobacter	-1728.7	1819.21	-0.95025	0.346846	1
valine_s	achromobacter	intest_surgery1	0.105114	0.153051	0.686791	0.49559	1
lithocholenic_acid_ba	achromobacter	(Intercept)	2.56236	0.642867	3.98583	0.000232959	1
lithocholenic_acid_ba	achromobacter	achromobacter	18006.6	7951.87	2.26444	0.0282007	1
lithocholenic_acid_ba	achromobacter	intest_surgery1	-1.92538	0.668995	-2.87801	0.00600346	1
isolithocholic_acid_ba	achromobacter	(Intercept)	5.1107	0.588049	8.69094	2.41924020320107e-11	1
isolithocholic_acid_ba	achromobacter	achromobacter	16057.2	7273.81	2.20754	0.0321938	1
isolithocholic_acid_ba	achromobacter	intest_surgery1	-1.82353	0.61195	-2.97986	0.00455385	1
allolithocholic_acid_ba	achromobacter	(Intercept)	1.22862	0.450222	2.72892	0.00891131	1
allolithocholic_acid_ba	achromobacter	achromobacter	12393.2	5568.97	2.2254	0.0308897	1
allolithocholic_acid_ba	achromobacter	intest_surgery1	-1.77849	0.468521	-3.79597	0.000420577	1
x3a_12a_23_nordeoxycholic_acid_ba	achromobacter	(Intercept)	-4.65622	0.701372	-6.63874	2.88963181726768e-08	1
x3a_12a_23_nordeoxycholic_acid_ba	achromobacter	achromobacter	16967.7	8675.54	1.95581	0.0564462	1
x3a_12a_23_nordeoxycholic_acid_ba	achromobacter	intest_surgery1	-0.258172	0.729878	-0.35372	0.725131	1
x3_6_diketocholanic_acid_ba	achromobacter	(Intercept)	2.74739	0.506128	5.42824	1.95118448732034e-06	1
x3_6_diketocholanic_acid_ba	achromobacter	achromobacter	7333.76	6260.5	1.17143	0.247329	1
x3_6_diketocholanic_acid_ba	achromobacter	intest_surgery1	-0.810889	0.526699	-1.53957	0.130372	1
x8_14_5b_cholenic_acid_3a_12a_diol_ba	achromobacter	(Intercept)	3.97758	0.672457	5.91501	3.61863249046064e-07	1
x8_14_5b_cholenic_acid_3a_12a_diol_ba	achromobacter	achromobacter	14580.2	8317.88	1.75288	0.0861441	1
x8_14_5b_cholenic_acid_3a_12a_diol_ba	achromobacter	intest_surgery1	-2.07814	0.699788	-2.96967	0.00468269	1
x5b_cholenic_acid_7a_ol_3_one_ba	achromobacter	(Intercept)	3.80426	0.243652	15.6135	3.16695803561006e-20	1
x5b_cholenic_acid_7a_ol_3_one_ba	achromobacter	achromobacter	-570.631	3013.83	-0.189338	0.850643	1
x5b_cholenic_acid_7a_ol_3_one_ba	achromobacter	intest_surgery1	-0.0934451	0.253555	-0.36854	0.714126	1
x5a_cholanic_acid_3a_ol_6_one_ba	achromobacter	(Intercept)	1.56524	1.21502	1.28824	0.20397	1
x5a_cholanic_acid_3a_ol_6_one_ba	achromobacter	achromobacter	22334.1	15029.1	1.48606	0.143942	1
x5a_cholanic_acid_3a_ol_6_one_ba	achromobacter	intest_surgery1	-1.82519	1.26441	-1.44351	0.155509	1
x3a_hydroxy_12_ketolithocholic_acid_ba	achromobacter	(Intercept)	2.76303	0.834075	3.31269	0.00178328	1
x3a_hydroxy_12_ketolithocholic_acid_ba	achromobacter	achromobacter	-30193	10317	-2.92653	0.00526638	1
x3a_hydroxy_12_ketolithocholic_acid_ba	achromobacter	intest_surgery1	2.8588	0.867975	3.29365	0.00188411	1
lithocholic_acid_ba	achromobacter	(Intercept)	5.13436	0.588733	8.72102	2.18581758747197e-11	1
lithocholic_acid_ba	achromobacter	achromobacter	16115.7	7282.27	2.21301	0.0317895	1
lithocholic_acid_ba	achromobacter	intest_surgery1	-1.82592	0.612662	-2.98031	0.00454832	1
x5b_cholanic_acid_3b_12a_diol_ba	achromobacter	(Intercept)	2.70204	0.398563	6.77946	1.76650093068113e-08	1
x5b_cholanic_acid_3b_12a_diol_ba	achromobacter	achromobacter	-6895.36	4929.98	-1.39866	0.16848	1
x5b_cholanic_acid_3b_12a_diol_ba	achromobacter	intest_surgery1	0.295677	0.414763	0.712883	0.479443	1
chenodeoxycholic_acid_cdca_ba	achromobacter	(Intercept)	3.75851	1.15608	3.25107	0.00212939	1
chenodeoxycholic_acid_cdca_ba	achromobacter	achromobacter	-49489.1	14300	-3.46076	0.00115677	1
chenodeoxycholic_acid_cdca_ba	achromobacter	intest_surgery1	4.63549	1.20307	3.85305	0.000352583	1
deoxycholic_acid_dca_ba	achromobacter	(Intercept)	3.95068	1.37462	2.87402	0.00606813	1
deoxycholic_acid_dca_ba	achromobacter	achromobacter	36755.4	17003.2	2.16168	0.0357682	1
deoxycholic_acid_dca_ba	achromobacter	intest_surgery1	-4.17868	1.43049	-2.92116	0.00534356	1
hyodeoxycholic_acid_ba	achromobacter	(Intercept)	3.977	0.390737	10.1782	1.80543013682792e-13	1
hyodeoxycholic_acid_ba	achromobacter	achromobacter	3162.23	4833.18	0.654276	0.516123	1
hyodeoxycholic_acid_ba	achromobacter	intest_surgery1	-0.13121	0.406618	-0.322686	0.748364	1
isodeoxycholic_acid_ba	achromobacter	(Intercept)	-2.86346	0.941483	-3.04144	0.0038437	1
isodeoxycholic_acid_ba	achromobacter	achromobacter	2294.89	11645.6	0.197061	0.844629	1
isodeoxycholic_acid_ba	achromobacter	intest_surgery1	1.62448	0.979749	1.65806	0.103966	1
murocholic_acid_muro_ca_ba	achromobacter	(Intercept)	2.67578	0.758904	3.52585	0.000953644	1
murocholic_acid_muro_ca_ba	achromobacter	achromobacter	-22309.8	9387.17	-2.37662	0.0215967	1
murocholic_acid_muro_ca_ba	achromobacter	intest_surgery1	1.5493	0.789749	1.96177	0.0557275	1
ursodeoxycholic_acid_udca_ba	achromobacter	(Intercept)	3.64063	0.392782	9.26883	3.50114142194946e-12	1
ursodeoxycholic_acid_udca_ba	achromobacter	achromobacter	-14625.1	4858.47	-3.01022	0.00418968	1
ursodeoxycholic_acid_udca_ba	achromobacter	intest_surgery1	1.19082	0.408746	2.91336	0.00545766	1
x3a_hydroxy_7_12_diketo_cholanic_acid_ba	achromobacter	(Intercept)	-1.70694	0.676487	-2.52324	0.0150689	1
x3a_hydroxy_7_12_diketo_cholanic_acid_ba	achromobacter	achromobacter	-11843.6	8367.73	-1.41539	0.163547	1
x3a_hydroxy_7_12_diketo_cholanic_acid_ba	achromobacter	intest_surgery1	1.8945	0.703982	2.69112	0.00983164	1
x5b_cholanic_acid_3a_6a_diol_7_one_ba	achromobacter	(Intercept)	-2.97274	0.660875	-4.49819	4.48421664837665e-05	1
x5b_cholanic_acid_3a_6a_diol_7_one_ba	achromobacter	achromobacter	15504.3	8174.62	1.89664	0.0640307	1
x5b_cholanic_acid_3a_6a_diol_7_one_ba	achromobacter	intest_surgery1	-0.583417	0.687736	-0.848315	0.400562	1
x3_dehydrocholic_acid_ba	achromobacter	(Intercept)	1.77494	0.691769	2.56579	0.0135431	1
x3_dehydrocholic_acid_ba	achromobacter	achromobacter	-35565.4	8556.75	-4.15641	0.00013569	1
x3_dehydrocholic_acid_ba	achromobacter	intest_surgery1	2.71553	0.719885	3.77217	0.000452507	1
cholic_acid_ca_ba	achromobacter	(Intercept)	4.72622	0.610243	7.74482	6.13764473999979e-10	1
cholic_acid_ca_ba	achromobacter	achromobacter	-29748.3	7548.33	-3.94104	0.000268083	1
cholic_acid_ca_ba	achromobacter	intest_surgery1	2.52861	0.635046	3.98178	0.000235939	1
hyocholic_acid_hca_ba	achromobacter	(Intercept)	0.853427	0.317255	2.69003	0.00985924	1
hyocholic_acid_hca_ba	achromobacter	achromobacter	548.274	3924.25	0.139714	0.889483	1
hyocholic_acid_hca_ba	achromobacter	intest_surgery1	-0.298688	0.330149	-0.904706	0.370235	1
glycoursocholanic_acid_ba	achromobacter	(Intercept)	-3.37487	0.733472	-4.60123	3.19356492746962e-05	1
glycoursocholanic_acid_ba	achromobacter	achromobacter	-4983.37	9072.61	-0.549276	0.585416	1
glycoursocholanic_acid_ba	achromobacter	intest_surgery1	-1.64507	0.763284	-2.15525	0.036296	1
glycolithocholic_acid_glca_ba	achromobacter	(Intercept)	-2.5517	0.39591	-6.44516	5.68729272382535e-08	1
glycolithocholic_acid_glca_ba	achromobacter	achromobacter	7252.65	4897.16	1.48099	0.145282	1
glycolithocholic_acid_glca_ba	achromobacter	intest_surgery1	-0.105721	0.412001	-0.256604	0.798604	1
glycoursodeoxycholic_acid_gudca_ba	achromobacter	(Intercept)	-3.24483	0.907676	-3.57488	0.000823639	1
glycoursodeoxycholic_acid_gudca_ba	achromobacter	achromobacter	-24137.3	11227.4	-2.14986	0.0367442	1
glycoursodeoxycholic_acid_gudca_ba	achromobacter	intest_surgery1	1.80823	0.944568	1.91435	0.0616743	1
glycochenodeoxycholic_acid_gcdca_ba	achromobacter	(Intercept)	1.63293	0.404307	4.03883	0.000197132	1
glycochenodeoxycholic_acid_gcdca_ba	achromobacter	achromobacter	-6614.75	5001.03	-1.32268	0.192342	1
glycochenodeoxycholic_acid_gcdca_ba	achromobacter	intest_surgery1	0.924851	0.420739	2.19816	0.0328983	1
glycodeoxycholic_acid_gdca_ba	achromobacter	(Intercept)	-0.984448	0.709407	-1.38771	0.171771	1
glycodeoxycholic_acid_gdca_ba	achromobacter	achromobacter	20895.6	8774.93	2.38129	0.021355	1
glycodeoxycholic_acid_gdca_ba	achromobacter	intest_surgery1	-1.03018	0.738241	-1.39545	0.169439	1
glycocholic_acid_gca_ba	achromobacter	(Intercept)	1.00715	0.405595	2.48313	0.0166487	1
glycocholic_acid_gca_ba	achromobacter	achromobacter	-7228.85	5016.96	-1.44088	0.156247	1
glycocholic_acid_gca_ba	achromobacter	intest_surgery1	0.785445	0.42208	1.86089	0.0690214	1
taurolithocholic_acid_tlca_ba	achromobacter	(Intercept)	-2.69875	0.701081	-3.84941	0.000356576	1
taurolithocholic_acid_tlca_ba	achromobacter	achromobacter	3283.82	8671.94	0.378672	0.706637	1
taurolithocholic_acid_tlca_ba	achromobacter	intest_surgery1	-0.972442	0.729576	-1.33289	0.188994	1
taurochenodeoxycholic_acid_tcdca_ba	achromobacter	(Intercept)	0.791667	0.558093	1.41852	0.162636	1
taurochenodeoxycholic_acid_tcdca_ba	achromobacter	achromobacter	-12928.5	6903.27	-1.8728	0.0673235	1
taurochenodeoxycholic_acid_tcdca_ba	achromobacter	intest_surgery1	0.620541	0.580777	1.06847	0.290767	1
taurodeoxycholic_acid_tdca_ba	achromobacter	(Intercept)	-0.886667	0.652218	-1.35946	0.180487	1
taurodeoxycholic_acid_tdca_ba	achromobacter	achromobacter	7252.68	8067.54	0.898996	0.373238	1
taurodeoxycholic_acid_tdca_ba	achromobacter	intest_surgery1	-1.75779	0.678727	-2.58984	0.0127446	1
tauro_w_muricholic_acid_tw_mca_ba	achromobacter	(Intercept)	-2.09437	0.948734	-2.20754	0.0321939	1
tauro_w_muricholic_acid_tw_mca_ba	achromobacter	achromobacter	-29457.4	11735.3	-2.51017	0.0155683	1
tauro_w_muricholic_acid_tw_mca_ba	achromobacter	intest_surgery1	0.679889	0.987294	0.688639	0.494436	1
taurocholic_acid_tca_ba	achromobacter	(Intercept)	1.62904	0.461458	3.53021	0.000941329	1
taurocholic_acid_tca_ba	achromobacter	achromobacter	-14010.1	5707.96	-2.45449	0.0178671	1
taurocholic_acid_tca_ba	achromobacter	intest_surgery1	0.539848	0.480214	1.12418	0.266645	1
x2_hydroxybutyrate_p	acidaminococcus	(Intercept)	-3.45624	0.105102	-32.8845	4.30453336648596e-34	1
x2_hydroxybutyrate_p	acidaminococcus	acidaminococcus	8.83082	21.359	0.413447	0.681159	1
x2_hydroxybutyrate_p	acidaminococcus	intest_surgery1	-0.280677	0.160431	-1.74952	0.0867286	1
x3_hydroxybutyrate_p	acidaminococcus	(Intercept)	-3.08247	0.180507	-17.0768	8.72564392931396e-22	1
x3_hydroxybutyrate_p	acidaminococcus	acidaminococcus	-18.1907	36.6827	-0.495894	0.622281	1
x3_hydroxybutyrate_p	acidaminococcus	intest_surgery1	-0.222103	0.27553	-0.806092	0.42425	1
x3_hydroxyisovalerate_p	acidaminococcus	(Intercept)	-4.64494	0.0176037	-263.862	3.5188775525557e-76	1
x3_hydroxyisovalerate_p	acidaminococcus	acidaminococcus	4.21781	3.57744	1.179	0.244331	1
x3_hydroxyisovalerate_p	acidaminococcus	intest_surgery1	-0.0325074	0.0268707	-1.20977	0.232418	1
acetate_p	acidaminococcus	(Intercept)	-2.73796	0.0449363	-60.9297	2.21372794794423e-46	1
acetate_p	acidaminococcus	acidaminococcus	-1.26241	9.132	-0.13824	0.890641	1
acetate_p	acidaminococcus	intest_surgery1	-0.0699126	0.068592	-1.01925	0.313301	1
acetoacetate_p	acidaminococcus	(Intercept)	-3.67991	0.103989	-35.3874	1.56173208319095e-35	1
acetoacetate_p	acidaminococcus	acidaminococcus	8.06833	21.1328	0.381792	0.704336	1
acetoacetate_p	acidaminococcus	intest_surgery1	-0.150945	0.158732	-0.950945	0.346497	1
alanine_p	acidaminococcus	(Intercept)	-1.44781	0.0454337	-31.8664	1.77374960015054e-33	1
alanine_p	acidaminococcus	acidaminococcus	6.20629	9.23309	0.672179	0.504761	1
alanine_p	acidaminococcus	intest_surgery1	0.0533469	0.0693513	0.769226	0.445608	1
citrate_p	acidaminococcus	(Intercept)	-2.37009	0.0538576	-44.0067	7.46063079217199e-40	1
citrate_p	acidaminococcus	acidaminococcus	-6.79749	10.945	-0.621058	0.537562	1
citrate_p	acidaminococcus	intest_surgery1	-0.0998641	0.0822099	-1.21475	0.230531	1
creatinine_p	acidaminococcus	(Intercept)	-3.63768	0.0588194	-61.8449	1.10789365828898e-46	1
creatinine_p	acidaminococcus	acidaminococcus	17.7596	11.9534	1.48574	0.144025	1
creatinine_p	acidaminococcus	intest_surgery1	-0.184853	0.0897837	-2.05887	0.0450722	1
formate_p	acidaminococcus	(Intercept)	-2.86499	0.0555042	-51.6175	4.80416571732094e-43	1
formate_p	acidaminococcus	acidaminococcus	-9.91077	11.2796	-0.878644	0.384065	1
formate_p	acidaminococcus	intest_surgery1	0.149157	0.0847233	1.76053	0.0848248	1
glucose_p	acidaminococcus	(Intercept)	1.14596	0.0197846	57.922	2.31814280637191e-45	1
glucose_p	acidaminococcus	acidaminococcus	6.51769	4.02065	1.62105	0.111697	1
glucose_p	acidaminococcus	intest_surgery1	-0.0636122	0.0301998	-2.10638	0.0405384	1
glutamine_p	acidaminococcus	(Intercept)	-1.06114	0.0282279	-37.592	1.00302890670358e-36	1
glutamine_p	acidaminococcus	acidaminococcus	-10.614	5.7365	-1.85026	0.0705673	1
glutamine_p	acidaminococcus	intest_surgery1	0.0592627	0.0430879	1.37539	0.17553	1
glycine_p	acidaminococcus	(Intercept)	-1.75525	0.0497541	-35.2784	1.79612486072452e-35	1
glycine_p	acidaminococcus	acidaminococcus	-7.10825	10.1111	-0.703015	0.485514	1
glycine_p	acidaminococcus	intest_surgery1	0.130553	0.0759461	1.71903	0.0921905	1
histidine_p	acidaminococcus	(Intercept)	-2.88092	0.0398091	-72.3685	7.40829761492127e-50	1
histidine_p	acidaminococcus	acidaminococcus	-5.64314	8.09004	-0.697541	0.488901	1
histidine_p	acidaminococcus	intest_surgery1	-0.00464454	0.0607657	-0.0764336	0.939399	1
isoleucine_p	acidaminococcus	(Intercept)	-3.10212	0.0718637	-43.1667	1.80641869559689e-39	1
isoleucine_p	acidaminococcus	acidaminococcus	6.24379	14.6042	0.427533	0.670943	1
isoleucine_p	acidaminococcus	intest_surgery1	-0.150861	0.109695	-1.37527	0.175566	1
isopropanol_p	acidaminococcus	(Intercept)	-5.1004	0.251186	-20.3053	6.62095504164591e-25	1
isopropanol_p	acidaminococcus	acidaminococcus	9.50492	51.0462	0.186202	0.853088	1
isopropanol_p	acidaminococcus	intest_surgery1	-0.00530562	0.383417	-0.0138377	0.989018	1
lactate_p	acidaminococcus	(Intercept)	-0.306417	0.0735122	-4.16824	0.000130658	1
lactate_p	acidaminococcus	acidaminococcus	17.8036	14.9392	1.19173	0.23935	1
lactate_p	acidaminococcus	intest_surgery1	0.128232	0.112211	1.14277	0.258922	1
leucine_p	acidaminococcus	(Intercept)	-2.61191	0.0634238	-41.1819	1.56100397955084e-38	1
leucine_p	acidaminococcus	acidaminococcus	7.90768	12.8891	0.613518	0.542492	1
leucine_p	acidaminococcus	intest_surgery1	-0.139431	0.0968119	-1.44023	0.156431	1
lysine_p	acidaminococcus	(Intercept)	-2.28861	0.051389	-44.5351	4.31253148625457e-40	1
lysine_p	acidaminococcus	acidaminococcus	9.5877	10.4433	0.91807	0.36327	1
lysine_p	acidaminococcus	intest_surgery1	-0.0783391	0.0784416	-0.998693	0.323058	1
phenylalanine_p	acidaminococcus	(Intercept)	-3.22898	0.04334	-74.5034	1.9111774008331e-50	1
phenylalanine_p	acidaminococcus	acidaminococcus	3.64765	8.8076	0.414148	0.68065	1
phenylalanine_p	acidaminococcus	intest_surgery1	-0.0706622	0.0661554	-1.06812	0.29092	1
pyruvate_p	acidaminococcus	(Intercept)	-3.31093	0.0813498	-40.6999	2.67460864722379e-38	1
pyruvate_p	acidaminococcus	acidaminococcus	19.0656	16.532	1.15325	0.254638	1
pyruvate_p	acidaminococcus	intest_surgery1	-0.000569412	0.124175	-0.00458557	0.996361	1
tryptophan_p	acidaminococcus	(Intercept)	-3.32887	0.0548446	-60.6965	2.64518086648267e-46	1
tryptophan_p	acidaminococcus	acidaminococcus	5.86864	11.1456	0.526544	0.600987	1
tryptophan_p	acidaminococcus	intest_surgery1	-0.122815	0.0837163	-1.46704	0.149025	1
tyrosine_p	acidaminococcus	(Intercept)	-3.01841	0.0679722	-44.4065	4.92466820827844e-40	1
tyrosine_p	acidaminococcus	acidaminococcus	8.00418	13.8134	0.579451	0.565052	1
tyrosine_p	acidaminococcus	intest_surgery1	-0.12996	0.103755	-1.25257	0.21656	1
valine_p	acidaminococcus	(Intercept)	-1.76225	0.0591044	-29.8159	3.49754803548864e-32	1
valine_p	acidaminococcus	acidaminococcus	-0.118405	12.0113	-0.00985787	0.992176	1
valine_p	acidaminococcus	intest_surgery1	-0.128853	0.0902186	-1.42823	0.159837	1
acetate_s	acidaminococcus	(Intercept)	4.16569	0.0859189	48.484	8.64634761286281e-42	1
acetate_s	acidaminococcus	acidaminococcus	8.71454	17.4605	0.499099	0.620038	1
acetate_s	acidaminococcus	intest_surgery1	0.132754	0.131149	1.01223	0.316609	1
alanine_s	acidaminococcus	(Intercept)	1.04025	0.0976126	10.657	3.9472754420214e-14	1
alanine_s	acidaminococcus	acidaminococcus	60.4643	19.8369	3.04807	0.00377373	1
alanine_s	acidaminococcus	intest_surgery1	0.259075	0.148999	1.73877	0.0886219	1
aspartate_s	acidaminococcus	(Intercept)	0.574146	0.0882223	6.50794	4.56607337530844e-08	1
aspartate_s	acidaminococcus	acidaminococcus	12.7406	17.9286	0.710629	0.480826	1
aspartate_s	acidaminococcus	intest_surgery1	-0.244756	0.134665	-1.81752	0.0755162	1
butyrate_s	acidaminococcus	(Intercept)	2.52066	0.137209	18.371	4.36630478250012e-23	1
butyrate_s	acidaminococcus	acidaminococcus	17.9205	27.8838	0.642684	0.523552	1
butyrate_s	acidaminococcus	intest_surgery1	-0.38359	0.20944	-1.8315	0.0733675	1
formate_s	acidaminococcus	(Intercept)	-1.33047	0.0889828	-14.952	1.73438694477398e-19	1
formate_s	acidaminococcus	acidaminococcus	-12.9306	18.0832	-0.715059	0.478109	1
formate_s	acidaminococcus	intest_surgery1	-0.0749645	0.135826	-0.551916	0.583621	1
glucose_s	acidaminococcus	(Intercept)	1.08122	0.165903	6.51718	4.42093372216777e-08	1
glucose_s	acidaminococcus	acidaminococcus	36.9263	33.715	1.09525	0.27899	1
glucose_s	acidaminococcus	intest_surgery1	0.49919	0.25324	1.97122	0.054603	1
glutamate_s	acidaminococcus	(Intercept)	1.31193	0.154281	8.50349	4.56225618704355e-11	1
glutamate_s	acidaminococcus	acidaminococcus	-0.808205	31.3531	-0.0257775	0.979544	1
glutamate_s	acidaminococcus	intest_surgery1	0.0926347	0.235499	0.393355	0.695836	1
glutamine_s	acidaminococcus	(Intercept)	0.424776	0.0856652	4.95857	9.67597299237534e-06	1
glutamine_s	acidaminococcus	acidaminococcus	8.75997	17.409	0.503187	0.617183	1
glutamine_s	acidaminococcus	intest_surgery1	-0.206577	0.130762	-1.57979	0.120861	1
histidine_s	acidaminococcus	(Intercept)	-0.726993	0.119067	-6.10574	1.86174080150625e-07	1
histidine_s	acidaminococcus	acidaminococcus	53.9081	24.197	2.22789	0.030712	1
histidine_s	acidaminococcus	intest_surgery1	-0.0198931	0.181748	-0.109454	0.913308	1
isoleucine_s	acidaminococcus	(Intercept)	0.658407	0.0856299	7.68898	7.44459829174665e-10	1
isoleucine_s	acidaminococcus	acidaminococcus	31.7144	17.4018	1.82248	0.074748	1
isoleucine_s	acidaminococcus	intest_surgery1	-0.0145372	0.130708	-0.111219	0.911917	1
lactate_s	acidaminococcus	(Intercept)	0.74359	0.137804	5.39598	2.18000807661068e-06	1
lactate_s	acidaminococcus	acidaminococcus	12.9118	28.0047	0.461057	0.646884	1
lactate_s	acidaminococcus	intest_surgery1	0.151703	0.210349	0.721197	0.474361	1
leucine_s	acidaminococcus	(Intercept)	0.944261	0.0884321	10.6778	3.69703760606379e-14	1
leucine_s	acidaminococcus	acidaminococcus	37.1427	17.9713	2.06678	0.0442884	1
leucine_s	acidaminococcus	intest_surgery1	0.0760176	0.134985	0.563154	0.576007	1
methylamine_s	acidaminococcus	(Intercept)	-1.60136	0.229626	-6.97379	8.95681548843911e-09	1
methylamine_s	acidaminococcus	acidaminococcus	-55.491	46.6649	-1.18914	0.240358	1
methylamine_s	acidaminococcus	intest_surgery1	-0.670593	0.350508	-1.9132	0.0618248	1
phenylalanine_s	acidaminococcus	(Intercept)	0.393336	0.0835508	4.70774	2.24302446259573e-05	1
phenylalanine_s	acidaminococcus	acidaminococcus	43.9851	16.9793	2.59052	0.0127227	1
phenylalanine_s	acidaminococcus	intest_surgery1	0.147731	0.127534	1.15836	0.252568	1
propionate_s	acidaminococcus	(Intercept)	2.89717	0.158933	18.2289	6.01815117694879e-23	1
propionate_s	acidaminococcus	acidaminococcus	9.34173	32.2986	0.289231	0.773677	1
propionate_s	acidaminococcus	intest_surgery1	-0.0816946	0.2426	-0.336746	0.737807	1
succinate_s	acidaminococcus	(Intercept)	-0.792068	0.405485	-1.95339	0.0567413	1
succinate_s	acidaminococcus	acidaminococcus	35.3144	82.4031	0.428557	0.670203	1
succinate_s	acidaminococcus	intest_surgery1	1.59559	0.618944	2.57793	0.0131346	1
trimethylamine_s	acidaminococcus	(Intercept)	-1.77028	0.162726	-10.8789	1.97027748427928e-14	1
trimethylamine_s	acidaminococcus	acidaminococcus	42.3602	33.0694	1.28095	0.206497	1
trimethylamine_s	acidaminococcus	intest_surgery1	0.173094	0.24839	0.696862	0.489322	1
tyrosine_s	acidaminococcus	(Intercept)	0.469323	0.0856917	5.47687	1.6504498559405e-06	1
tyrosine_s	acidaminococcus	acidaminococcus	44.3029	17.4144	2.54404	0.0143045	1
tyrosine_s	acidaminococcus	intest_surgery1	0.0414569	0.130802	0.316943	0.75269	1
valine_s	acidaminococcus	(Intercept)	1.08007	0.0959646	11.2549	6.15825234502783e-15	1
valine_s	acidaminococcus	acidaminococcus	35.9195	19.502	1.84183	0.0718145	1
valine_s	acidaminococcus	intest_surgery1	0.093332	0.146483	0.637152	0.527117	1
lithocholenic_acid_ba	acidaminococcus	(Intercept)	3.65677	0.452935	8.0735	1.97904443462834e-10	1
lithocholenic_acid_ba	acidaminococcus	acidaminococcus	-16.4966	92.046	-0.179221	0.858534	1
lithocholenic_acid_ba	acidaminococcus	intest_surgery1	-2.30234	0.691373	-3.33009	0.00169566	1
isolithocholic_acid_ba	acidaminococcus	(Intercept)	6.10514	0.411767	14.8267	2.40744860307965e-19	1
isolithocholic_acid_ba	acidaminococcus	acidaminococcus	-51.7921	83.6798	-0.618931	0.53895	1
isolithocholic_acid_ba	acidaminococcus	intest_surgery1	-2.10787	0.628534	-3.35364	0.00158358	1
allolithocholic_acid_ba	acidaminococcus	(Intercept)	1.98587	0.316475	6.27497	1.03107752604691e-07	1
allolithocholic_acid_ba	acidaminococcus	acidaminococcus	-19.3897	64.3144	-0.301484	0.764376	1
allolithocholic_acid_ba	acidaminococcus	intest_surgery1	-2.02671	0.483077	-4.19542	0.00011977	1
x3a_12a_23_nordeoxycholic_acid_ba	acidaminococcus	(Intercept)	-3.65623	0.486934	-7.50869	1.3903662706782e-09	1
x3a_12a_23_nordeoxycholic_acid_ba	acidaminococcus	acidaminococcus	47.1666	98.9552	0.476646	0.635823	1
x3a_12a_23_nordeoxycholic_acid_ba	acidaminococcus	intest_surgery1	-0.701002	0.74327	-0.943133	0.350436	1
x3_6_diketocholanic_acid_ba	acidaminococcus	(Intercept)	3.20107	0.343243	9.32595	2.89799524392987e-12	1
x3_6_diketocholanic_acid_ba	acidaminococcus	acidaminococcus	-22.6418	69.7542	-0.324594	0.746929	1
x3_6_diketocholanic_acid_ba	acidaminococcus	intest_surgery1	-0.942172	0.523936	-1.79826	0.0785605	1
x8_14_5b_cholenic_acid_3a_12a_diol_ba	acidaminococcus	(Intercept)	4.85417	0.464489	10.4506	7.57602297703454e-14	1
x8_14_5b_cholenic_acid_3a_12a_diol_ba	acidaminococcus	acidaminococcus	5.85215	94.394	0.061997	0.950828	1
x8_14_5b_cholenic_acid_3a_12a_diol_ba	acidaminococcus	intest_surgery1	-2.41021	0.70901	-3.3994	0.00138557	1
x5b_cholenic_acid_7a_ol_3_one_ba	acidaminococcus	(Intercept)	3.76899	0.163118	23.1059	2.62609827043254e-27	1
x5b_cholenic_acid_7a_ol_3_one_ba	acidaminococcus	acidaminococcus	1.70697	33.149	0.0514939	0.95915	1
x5b_cholenic_acid_7a_ol_3_one_ba	acidaminococcus	intest_surgery1	-0.0831536	0.248988	-0.333967	0.73989	1
x5a_cholanic_acid_3a_ol_6_one_ba	acidaminococcus	(Intercept)	2.89666	0.831708	3.48278	0.00108382	1
x5a_cholanic_acid_3a_ol_6_one_ba	acidaminococcus	acidaminococcus	31.7006	169.021	0.187555	0.852033	1
x5a_cholanic_acid_3a_ol_6_one_ba	acidaminococcus	intest_surgery1	-2.36562	1.26954	-1.86336	0.0686659	1
x3a_hydroxy_12_ketolithocholic_acid_ba	acidaminococcus	(Intercept)	0.875332	0.599352	1.46046	0.150816	1
x3a_hydroxy_12_ketolithocholic_acid_ba	acidaminococcus	acidaminococcus	133.133	121.801	1.09303	0.279949	1
x3a_hydroxy_12_ketolithocholic_acid_ba	acidaminococcus	intest_surgery1	3.34352	0.914869	3.65465	0.000647621	1
lithocholic_acid_ba	acidaminococcus	(Intercept)	6.13258	0.412313	14.8736	2.12895055872056e-19	1
lithocholic_acid_ba	acidaminococcus	acidaminococcus	-52.3115	83.7908	-0.624311	0.535442	1
lithocholic_acid_ba	acidaminococcus	intest_surgery1	-2.11084	0.629367	-3.35391	0.00158233	1
x5b_cholanic_acid_3b_12a_diol_ba	acidaminococcus	(Intercept)	2.25807	0.269221	8.3874	6.76902086043952e-11	1
x5b_cholanic_acid_3b_12a_diol_ba	acidaminococcus	acidaminococcus	56.198	54.7115	1.02717	0.309598	1
x5b_cholanic_acid_3b_12a_diol_ba	acidaminococcus	intest_surgery1	0.370339	0.410948	0.901182	0.372086	1
chenodeoxycholic_acid_cdca_ba	acidaminococcus	(Intercept)	0.693224	0.858999	0.807014	0.423724	1
chenodeoxycholic_acid_cdca_ba	acidaminococcus	acidaminococcus	160.413	174.567	0.918919	0.36283	1
chenodeoxycholic_acid_cdca_ba	acidaminococcus	intest_surgery1	5.51075	1.3112	4.20283	0.00011696	1
deoxycholic_acid_dca_ba	acidaminococcus	(Intercept)	6.23125	0.960262	6.48912	4.87683450273261e-08	1
deoxycholic_acid_dca_ba	acidaminococcus	acidaminococcus	-127.143	195.146	-0.651529	0.517879	1
deoxycholic_acid_dca_ba	acidaminococcus	intest_surgery1	-4.81755	1.46577	-3.2867	0.00192221	1
hyodeoxycholic_acid_ba	acidaminococcus	(Intercept)	4.15258	0.261774	15.8632	1.68798990340347e-20	1
hyodeoxycholic_acid_ba	acidaminococcus	acidaminococcus	30.421	53.1979	0.571845	0.570152	1
hyodeoxycholic_acid_ba	acidaminococcus	intest_surgery1	-0.24396	0.399579	-0.610543	0.544444	1
isodeoxycholic_acid_ba	acidaminococcus	(Intercept)	-2.63215	0.616003	-4.27295	9.33433074468554e-05	1
isodeoxycholic_acid_ba	acidaminococcus	acidaminococcus	-186.188	125.185	-1.48731	0.143613	1
isodeoxycholic_acid_ba	acidaminococcus	intest_surgery1	1.83363	0.940285	1.95008	0.0571457	1
murocholic_acid_muro_ca_ba	acidaminococcus	(Intercept)	1.26517	0.529376	2.38992	0.0209138	1
murocholic_acid_muro_ca_ba	acidaminococcus	acidaminococcus	129.997	107.58	1.20837	0.23295	1
murocholic_acid_muro_ca_ba	acidaminococcus	intest_surgery1	1.86328	0.808056	2.30588	0.0255764	1
ursodeoxycholic_acid_udca_ba	acidaminococcus	(Intercept)	2.71539	0.280331	9.68638	8.86495560827988e-13	1
ursodeoxycholic_acid_udca_ba	acidaminococcus	acidaminococcus	86.2568	56.9692	1.5141	0.136698	1
ursodeoxycholic_acid_udca_ba	acidaminococcus	intest_surgery1	1.3952	0.427906	3.26053	0.00207238	1
x3a_hydroxy_7_12_diketo_cholanic_acid_ba	acidaminococcus	(Intercept)	-2.42695	0.462206	-5.2508	3.58539556909676e-06	1
x3a_hydroxy_7_12_diketo_cholanic_acid_ba	acidaminococcus	acidaminococcus	11.197	93.9301	0.119206	0.905621	1
x3a_hydroxy_7_12_diketo_cholanic_acid_ba	acidaminococcus	intest_surgery1	2.14196	0.705525	3.03597	0.00390223	1
x5b_cholanic_acid_3a_6a_diol_7_one_ba	acidaminococcus	(Intercept)	-2.01337	0.457579	-4.40005	6.18143196254752e-05	1
x5b_cholanic_acid_3a_6a_diol_7_one_ba	acidaminococcus	acidaminococcus	-48.3644	92.9897	-0.520105	0.605432	1
x5b_cholanic_acid_3a_6a_diol_7_one_ba	acidaminococcus	intest_surgery1	-0.860268	0.698462	-1.23166	0.224203	1
x3_dehydrocholic_acid_ba	acidaminococcus	(Intercept)	-0.416944	0.537241	-0.776084	0.441588	1
x3_dehydrocholic_acid_ba	acidaminococcus	acidaminococcus	93.2449	109.179	0.854057	0.397406	1
x3_dehydrocholic_acid_ba	acidaminococcus	intest_surgery1	3.37533	0.820061	4.11595	0.000154374	1
cholic_acid_ca_ba	acidaminococcus	(Intercept)	2.88399	0.466026	6.18848	1.39474926690252e-07	1
cholic_acid_ca_ba	acidaminococcus	acidaminococcus	95.7557	94.7063	1.01108	0.317155	1
cholic_acid_ca_ba	acidaminococcus	intest_surgery1	3.05568	0.711355	4.29557	8.67681235678812e-05	1
hyocholic_acid_hca_ba	acidaminococcus	(Intercept)	0.898649	0.211641	4.2461	0.000101781	1
hyocholic_acid_hca_ba	acidaminococcus	acidaminococcus	-24.3555	43.01	-0.566275	0.573901	1
hyocholic_acid_hca_ba	acidaminococcus	intest_surgery1	-0.27684	0.323055	-0.856943	0.395825	1
glycoursocholanic_acid_ba	acidaminococcus	(Intercept)	-3.61721	0.485247	-7.45436	1.67892631238883e-09	1
glycoursocholanic_acid_ba	acidaminococcus	acidaminococcus	-116.816	98.6125	-1.1846	0.242131	1
glycoursocholanic_acid_ba	acidaminococcus	intest_surgery1	-1.37116	0.740695	-1.85117	0.0704338	1
glycolithocholic_acid_glca_ba	acidaminococcus	(Intercept)	-2.13228	0.269818	-7.90267	3.56037773610368e-10	1
glycolithocholic_acid_glca_ba	acidaminococcus	acidaminococcus	36.2316	54.8327	0.660767	0.511988	1
glycolithocholic_acid_glca_ba	acidaminococcus	intest_surgery1	-0.317457	0.411858	-0.770792	0.444688	1
glycoursodeoxycholic_acid_gudca_ba	acidaminococcus	(Intercept)	-4.82026	0.612984	-7.8636	4.0735218768988e-10	1
[truncated: 255,401+ more rows]
